# Supplementary material for: Nickel-catalysed migratory hydroalkynylation and enantioselective hydroalkynylation of olefins with bromoalkynes
Source: PubMed Central journal article supplement (PMC8213830; doi:10.1038/s41467-021-24094-9), 2021-06-18
Supplement: 41467_2021_24094_MOESM1_ESM.pdf [file 41467_2021_24094_MOESM1_ESM.pdf]

# **Supplementary Information**

**Nickel-catalysed migratory hydroalkynylation and enantioselective  
hydroalkynylation of olefins with bromoalkynes**

*Jiang et al.*

## Supplementary Methods

**General reagent information.** Solvents were either purified and dried by passage through alumina and Q5 reactant-packed columns on a solvent purification system or bought from the commercial sources and transferred to the glovebox without exposure to air. Other commercial reagents were purchased from Sigma-Aldrich, Acros, Alfa Aesar, TCI, Aladdin, J&K, Energy Chemical, Bide Pharmatech Ltd. and were used as received. Flash chromatography was performed using glass columns with silica gel (*SiliaFlash*® P60, particle size 40-63  $\mu\text{m}$ , Silicycle).

**NiBr<sub>2</sub>·diglyme** (CAS 312696-09-6) was purchased from Sigma-Aldrich;

**NiI<sub>2</sub>·xH<sub>2</sub>O** (CAS 7790-34-3) was purchased from Strem Chemical;

**Na<sub>2</sub>CO<sub>3</sub>** (CAS 497-19-8) was purchased from Alfa Aesar;

**K<sub>3</sub>PO<sub>4</sub>·H<sub>2</sub>O** (CAS 27176-10-9) was purchased from Sigma-Aldrich;

**NaI** (CAS 7681-82-5) was purchased from Alfa Aesar (ACS, 99.0% min.);

**DME** (CAS 110-71-4, 99.9%, extra dry, with molecular sieves, water  $\leq$  30 ppm (by K.F.), EnergySeal) was purchased from Energy Chemical;

**Benzotrifluoride** (PhCF<sub>3</sub>, CAS 98-08-8, 99%, SuperDry, water  $\leq$  10 ppm, J&K Seal) was purchased from J&K;

**Diglyme** (CAS 111-96-6, 99.5%, SuperDry, J&K Seal) was purchased from J&K;

**Bathocuproine** (CAS 4733-39-5) was purchased from Energy Chemical;

**4-Phenyl-1-butene** (CAS 768-56-9) was purchased from TCI;

**PMHS** (CAS 63148-57-2, poly(methylhydrosiloxane)) was purchased from Sigma-Aldrich and stored under nitrogen at  $-20$  °C in glove box;

**(MeO)<sub>3</sub>SiH** (CAS 2487-90-3) was purchased from Energy Chemical and stored under nitrogen at  $-20$  °C in glove box;

**Safety note:** MSDS indicates that (MeO)<sub>3</sub>SiH is a corrosive and flammable liquid. According to the literatures<sup>[1,2]</sup>, it may form pyrophoric gas (possibly SiH<sub>4</sub>) during the storage or reaction. Although during our reaction, we used (MeO)<sub>3</sub>SiH without incident and SiH<sub>4</sub> was not observed, we urge the users of these procedures to be alert to the possibility of SiH<sub>4</sub> formation and possible exotherms and to take suitable precautions (suitable eye protection is also required).

**General analytical information.** All compounds (starting materials and products) were characterized by <sup>1</sup>H NMR, <sup>13</sup>C NMR, IR spectroscopy and high-resolution mass spectrometry. <sup>1</sup>H NMR spectra were recorded on Bruker 500 MHz spectrometer and are referenced relative to residual CDCl<sub>3</sub> proton signals at  $\delta$  7.26 ppm. <sup>19</sup>F NMR spectra were recorded on a Bruker 500 MHz spectrometer and are referenced to CFCl<sub>3</sub> ( $\delta$  0.0

ppm). Data for  $^1\text{H}$  and  $^{19}\text{F}$  NMR are reported as follows: chemical shift ( $\delta$  ppm), multiplicity (s = singlet, d = doublet, t = triplet, q = quartet, m = multiplet, br = broad), integration, and coupling constant (Hz).  $^{13}\text{C}$  NMR spectra were recorded on a Bruker 500 MHz spectrometer and are referenced to  $\text{CDCl}_3$  at  $\delta$  77.16 ppm. The  $^{13}\text{C}$  NMR spectra were obtained with  $^1\text{H}$  decoupling. Data for  $^{13}\text{C}$  NMR are reported in terms of chemical shift and multiplicity where appropriate. IR spectra were obtained on a Bruker Alpha and was reported in terms of frequency of absorption ( $\text{cm}^{-1}$ ). GC analyses were performed on Agilent 7890 or 8890 gas chromatograph with an FID detector using a J&W DB-1 column (10 m, 0.1 mm I.D.). Low Resolution Mass spectra were obtained from on an Agilent 5977A GC-MS. r.r. refers to regioisomeric ratio, representing the ratio of the terminal coupling product to the sum of all other isomers as determined by GC and GC-MS analysis. High Resolution Mass spectra were obtained from on an Agilent 6540 Q-TOF mass spectrometer, operating electrospray ionization (ESI) mode. High pressure liquid chromatography (HPLC) was performed on Agilent 1260 Series chromatographs using Daicel Chiralcel columns (250 mm). Optical rotations were measured on a Rudolph Research Analytical Autopol VI automatic polarimeter using a 50 mm pathlength cell at 589 nm with  $[\alpha]_D$  values reported in degrees; concentration (c) is in g/100 mL.

Medium-sized screw-cap test tubes (8 mL) were used for all 0.20 mmol scale reactions:

**a** Fisher 13×100 mm tube (Cat. No. 14-959-35C)

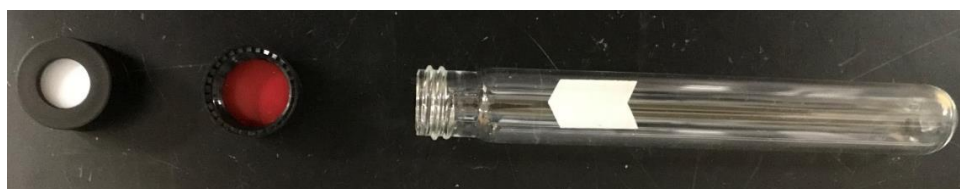

**b** Cap with Septa: Thermo Scientific ASM PHN CAP w/PTFE/SIL (Cat. No. 03378316)

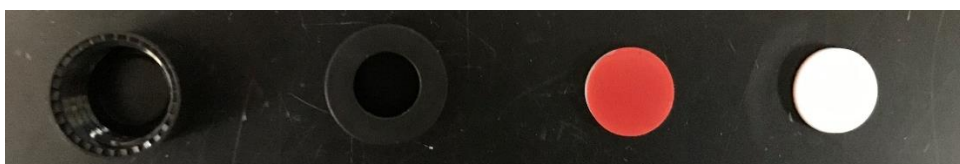

**Supplementary Fig. 1.** Screw-cap test tube and cap used.

## NiH-Catalyzed Reductive Migratory Hydroalkynylation

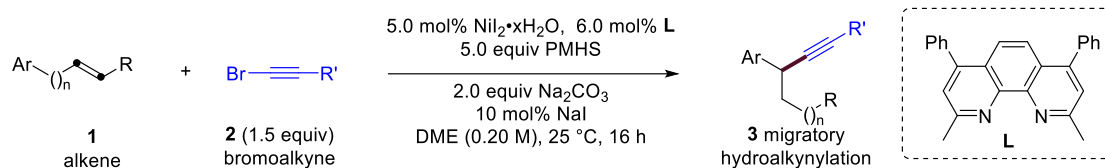

### **General procedure (A) for NiH-catalyzed reductive migratory hydroalkynylation.**

In a nitrogen-filled glove box, to an oven-dried 8 mL screw-cap vial equipped with a magnetic stir bar were added NiI<sub>2</sub>·xH<sub>2</sub>O (3.8 mg, 5.0 mol%), **L** (4.3 mg, 6.0 mol%), Na<sub>2</sub>CO<sub>3</sub> (42.4 mg, 2.0 equiv), NaI (3.0 mg, 10.0 mol%) and anhydrous DME (1.0 mL). The mixture was stirred for 20 min at room temperature (stirred at 800 rpm) before the addition of PMHS (60 μL, 1.0 mmol, 5.0 equiv). Stirring was continued for an additional 5 min at room temperature before the addition of olefin **1** (0.20 mmol, 1.0 equiv) and bromoalkyne **2** (0.30 mmol, 1.5 equiv). The tube was sealed with a teflon-lined screw cap, removed from the glove box and the reaction was stirred at 25 °C for up to 16 h (the mixture was stirred at 1000 rpm). After the reaction was complete, the reaction was quenched upon the addition of H<sub>2</sub>O, and the mixture was extracted with EtOAc. The organic layer was concentrated to give the crude product. Dodecane (20 μL) was added as an internal standard for GC analysis. The product was purified by flash column chromatography (petroleum ether/EtOAc) for each substrate. The yields reported are the average of at least two experiments, unless otherwise indicated.

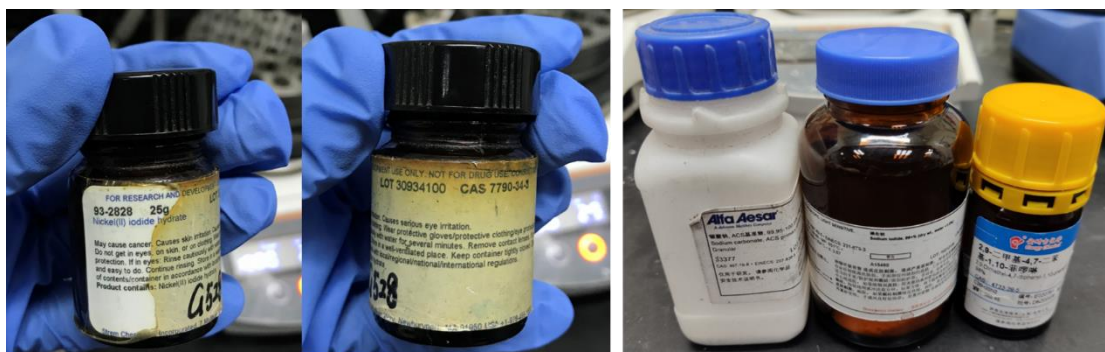

$\text{NiI}_2 \cdot x\text{H}_2\text{O}$

$\text{Na}_2\text{CO}_3$ , NaI, L

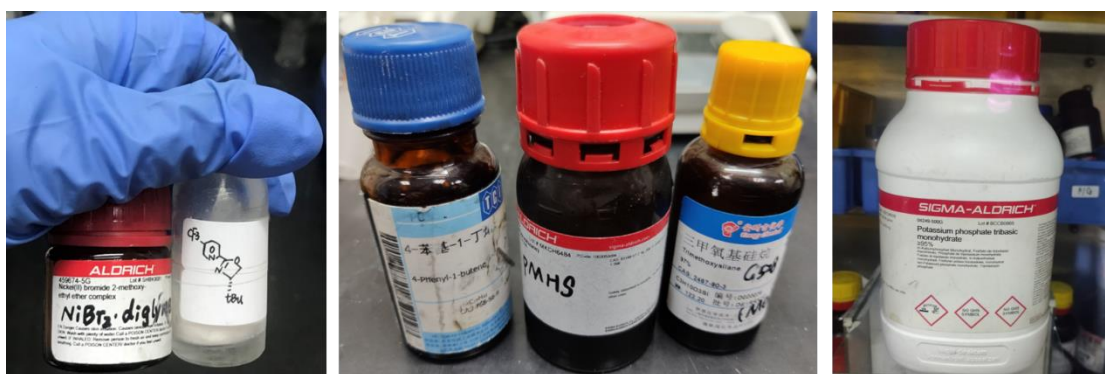

L\*,  $\text{NiBr}_2 \cdot \text{diglyme}$

PMHS,  $(\text{MeO})_3\text{SiH}$ ,  
4-Phenyl-1-butene

$\text{K}_3\text{PO}_4 \cdot \text{H}_2\text{O}$

Supplementary Fig. 2. Catalyst and reagents to be used.

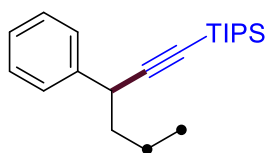

**Triisopropyl(3-phenylhex-1-yn-1-yl)silane** (Figure 3, **3a**). From **4-phenyl-1-butene** (**1a**) (26.4 mg, 0.20 mmol) and **(bromoethynyl)triisopropylsilane** (**2a**) (78.4 mg, 0.30 mmol), the title compound was prepared following the general procedure **A** using  $\text{NiI}_2 \cdot x\text{H}_2\text{O}$  (3.8 mg, 5.0 mol%), **L** (4.3 mg, 6.0 mol%),  $\text{Na}_2\text{CO}_3$  (42.4 mg, 2.0 equiv), NaI (3.0 mg, 10 mol%), PMHS (60.0  $\mu\text{L}$ , 5.0 equiv) and anhydrous DME (1.0 mL). The reaction mixture was stirred for 16 h at 25 °C. The crude material was purified by flash column chromatography (petroleum ether) to provide the title compound as a colorless liquid in 82% yield (51.6 mg), and >99:1 rr was detected by GC.

$^1\text{H NMR}$  (500 MHz,  $\text{CDCl}_3$ )  $\delta$  7.44 – 7.39 (m, 2H), 7.36 – 7.30 (m, 2H), 7.27 – 7.22 (m, 1H), 3.74 (dd,  $J = 7.9, 6.4$  Hz, 1H), 1.78 – 1.69 (m, 2H), 1.60 – 1.46 (m, 2H), 1.20 – 1.06 (m, 21H), 0.96 (t,  $J = 7.4$  Hz, 3H);

$^{13}\text{C NMR}$  (126 MHz,  $\text{CDCl}_3$ )  $\delta$  142.4, 128.4, 127.6, 126.5, 110.2, 83.1, 41.4, 38.8, 20.6, 18.8, 13.9, 11.4;

**HRMS** (ESI) calcd. for  $\text{C}_{21}\text{H}_{34}\text{SiNa}$   $[\text{M}+\text{Na}]^+$   $m/z$  337.2322, found 337.2320;

**IR** (neat,  $\text{cm}^{-1}$ ) 2941, 2864, 2164, 1462, 1097, 663.

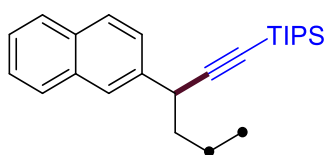

**Triisopropyl(3-(naphthalen-2-yl)hex-1-yn-1-yl)silane** (Figure 3, **3b**). From **2-(but-3-en-1-yl)naphthalene** (**1b**) (36.4 mg, 0.20 mmol), and **(bromoethynyl)triisopropylsilane** (**2a**) (78.4 mg, 0.30 mmol), the title compound was prepared following the general procedure **A** using  $\text{NiI}_2 \cdot x\text{H}_2\text{O}$  (3.8 mg, 5.0 mol%), **L** (4.3 mg, 6.0 mol%),  $\text{Na}_2\text{CO}_3$  (42.4 mg, 2.0 equiv), NaI (3.0 mg, 10 mol%), PMHS (60.0  $\mu\text{L}$ , 5.0 equiv) and anhydrous DME (1.0 mL). The reaction mixture was stirred for 16 h at 25 °C. The crude material was purified by flash column chromatography (petroleum ether) to provide the title compound as a colorless liquid in 54% yield (39.6 mg),

and >99:1 rr was detected by GC.

**<sup>1</sup>H NMR** (500 MHz, CDCl<sub>3</sub>) δ 7.90 – 7.86 (m, 1H), 7.84 – 7.78 (m, 3H), 7.54 – 7.42 (m, 3H), 3.88 (t, *J* = 7.1 Hz, 1H), 1.88 – 1.75 (m, 2H), 1.64 – 1.39 (m, 2H), 1.19 – 1.07 (m, 21H), 0.95 (t, *J* = 7.4 Hz, 3H);

**<sup>13</sup>C NMR** (126 MHz, CDCl<sub>3</sub>) δ 139.8, 133.5, 132.4, 128.0, 127.8, 127.7, 126.2, 126.1 (2C), 125.5, 110.2, 83.5, 41.0, 38.9, 20.6, 18.8, 13.9, 11.5;

**HRMS** (ESI) calcd. for C<sub>25</sub>H<sub>36</sub>SiNa [M+Na]<sup>+</sup> *m/z* 387.2478, found 387.2480;

**IR** (neat, cm<sup>-1</sup>) 2956, 2891, 2167, 1462, 854, 744.

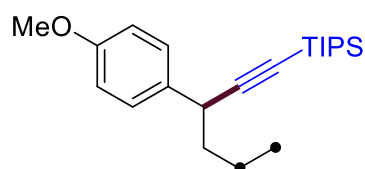

**Triisopropyl(3-(4-methoxyphenyl)hex-1-yn-1-yl)silane** (Figure 3, **3c**). From **1-(but-3-en-1-yl)-4-methoxybenzene** (**1c**) (32.4 mg, 0.20 mmol), and **(bromoethynyl)triisopropylsilane** (**2a**) (78.4 mg, 0.30 mmol), the title compound was prepared following the general procedure **A** using NiI<sub>2</sub>·xH<sub>2</sub>O (3.8 mg, 5.0 mol%), **L** (4.3 mg, 6.0 mol%), Na<sub>2</sub>CO<sub>3</sub> (42.4 mg, 2.0 equiv), NaI (3.0 mg, 10 mol%), PMHS (60.0 μL, 5.0 equiv) and anhydrous diglyme (1.0 mL). The reaction mixture was stirred for 16 h at 25 °C. The crude material was purified by flash column chromatography (petroleum ether) to provide the title compound as a colorless liquid in 75% yield (51.8 mg), and >99:1 rr was detected by GC.

**<sup>1</sup>H NMR** (500 MHz, CDCl<sub>3</sub>) δ 7.30 (d, *J* = 8.6 Hz, 2H), 6.87 (d, *J* = 8.6 Hz, 2H), 3.81 (s, 3H), 3.67 (dd, *J* = 8.0, 6.3 Hz, 1H), 1.75 – 1.64 (m, 2H), 1.59 – 1.35 (m, 2H), 1.12 – 0.97 (m, 21H), 0.93 (t, *J* = 7.4 Hz, 3H);

**<sup>13</sup>C NMR** (126 MHz, CDCl<sub>3</sub>) δ 158.3, 134.6, 128.5, 113.8, 110.6, 82.8, 55.3, 41.4, 37.9, 20.5, 18.8, 13.9, 11.4;

**HRMS** (ESI) calcd. for C<sub>22</sub>H<sub>36</sub>O<sub>2</sub>SiNa [M+Na]<sup>+</sup> *m/z* 367.2428, found 367.2426;

**IR** (neat, cm<sup>-1</sup>) 2955, 2863, 2167, 1610, 1462, 882.

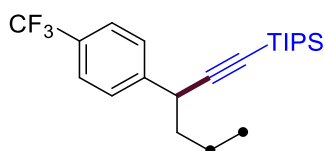

**Triisopropyl(3-(4-(trifluoromethyl)phenyl)hex-1-yn-1-yl)silane** (Figure 3, **3d**). From **1-(but-3-en-1-yl)-4-(trifluoromethyl)benzene (1d)** (40.0 mg, 0.20 mmol), and **(bromoethynyl)triisopropylsilane (2a)** (78.4 mg, 0.30 mmol), the title compound was prepared following the general procedure **A** using  $\text{NiI}_2 \cdot x\text{H}_2\text{O}$  (3.8 mg, 5.0 mol%), **L** (4.3 mg, 6.0 mol%),  $\text{Na}_2\text{CO}_3$  (42.4 mg, 2.0 equiv), NaI (3.0 mg, 10 mol%), PMHS (60.0  $\mu\text{L}$ , 5.0 equiv) and anhydrous diglyme (1.0 mL). The reaction mixture was stirred for 16 h at 25 °C. The crude material was purified by flash column chromatography (petroleum ether) to provide the title compound as a colorless liquid in 92% yield (70.0 mg), and >99:1 rr was detected by GC.

$^1\text{H NMR}$  (500 MHz,  $\text{CDCl}_3$ )  $\delta$  7.58 (d,  $J = 8.1$  Hz, 2H), 7.50 (d,  $J = 8.1$  Hz, 2H), 3.77 (dd,  $J = 7.9, 6.5$  Hz, 1H), 1.76 – 1.67 (m, 2H), 1.58 – 1.46 (m, 2H), 1.16 – 1.04 (m, 21H), 0.94 (t,  $J = 7.3$  Hz, 3H);

$^{13}\text{C NMR}$  (126 MHz,  $\text{CDCl}_3$ )  $\delta$  146.5, 128.9 (q,  $J = 32.4$  Hz), 127.9, 125.4 (q,  $J = 3.9$  Hz), 124.2 (q,  $J = 272.4$  Hz), 109.0, 84.1, 41.1, 38.7, 20.5, 18.8, 13.8, 11.4;

$^{19}\text{F NMR}$  (471 MHz,  $\text{CDCl}_3$ )  $\delta$  -62.3;

**HRMS** (ESI) calcd. for  $\text{C}_{22}\text{H}_{33}\text{F}_3\text{SiNa}$   $[\text{M}+\text{Na}]^+$   $m/z$  405.2196, found 405.2198;

**IR** (neat,  $\text{cm}^{-1}$ ) 2958, 2865, 2169, 1463, 882, 675.

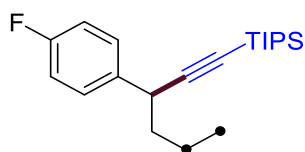

**(3-(4-Fluorophenyl)hex-1-yn-1-yl)triisopropylsilane** (Figure 3, **3e**). From **1-(but-3-en-1-yl)-4-fluorobenzene (1e)** (30.0 mg, 0.20 mmol), and **(bromoethynyl)triisopropylsilane (2a)** (78.4 mg, 0.30 mmol), the title compound was prepared following the general procedure **A** using  $\text{NiI}_2 \cdot x\text{H}_2\text{O}$  (3.8 mg, 5.0 mol%), **L** (4.3 mg, 6.0 mol%),  $\text{Na}_2\text{CO}_3$  (42.4 mg, 2.0 equiv), NaI (3.0 mg, 10 mol%), PMHS (60.0  $\mu\text{L}$ , 5.0 equiv) and anhydrous DME (1.0 mL). The reaction mixture was stirred for 16



h at 25 °C. The crude material was purified by flash column chromatography (petroleum ether) to provide the title compound as a colorless liquid in 65% yield (43.2 mg), and >99:1 rr was detected by GC.

<sup>1</sup>H NMR (500 MHz, CDCl<sub>3</sub>) δ 7.37 – 7.30 (m, 2H), 7.04 – 6.96 (m, 2H), 3.69 (dd, *J* = 8.1, 6.2 Hz, 1H), 1.74 – 1.65 (m, 2H), 1.55 – 1.38 (m, 2H), 1.12 – 1.04 (m, 21H), 0.93 (t, *J* = 7.4 Hz, 3H);

<sup>13</sup>C NMR (126 MHz, CDCl<sub>3</sub>) δ 161.7 (d, *J* = 244.6 Hz), 138.1 (d, *J* = 3.3 Hz), 129.0 (d, *J* = 8.8 Hz), 115.1 (d, *J* = 21.3 Hz), 110.0, 83.4, 41.3, 38.0, 20.5, 18.8, 13.8, 11.4;

<sup>19</sup>F NMR (471 MHz, CDCl<sub>3</sub>) δ –116.8;

HRMS (ESI) calcd. for C<sub>21</sub>H<sub>33</sub>FSiNa [M+Na]<sup>+</sup> *m/z* 355.2228, found 355.2225;

IR (neat, cm<sup>-1</sup>) 2957, 2864, 2168, 1604, 1462, 665.

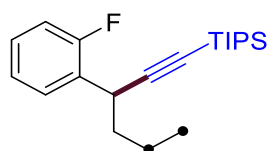

**(3-(2-Fluorophenyl)hex-1-yn-1-yl)triisopropylsilane** (Figure 3, **3f**). From **1-(but-3-en-1-yl)-2-fluorobenzene** (**1f**) (30.0 mg, 0.20 mmol), and **(bromoethynyl)triisopropylsilane** (**2a**) (78.4 mg, 0.30 mmol), the title compound was prepared following the general procedure **A** using NiI<sub>2</sub>·xH<sub>2</sub>O (3.8 mg, 5.0 mol%), **L** (4.3 mg, 6.0 mol%), Na<sub>2</sub>CO<sub>3</sub> (42.4 mg, 2.0 equiv), NaI (3.0 mg, 10 mol%), PMHS (60.0 μL, 5.0 equiv) and anhydrous DME (1.0 mL). The reaction mixture was stirred for 16 h at 25 °C. The crude material was purified by flash column chromatography (petroleum ether) to provide the title compound as a colorless liquid in 75% yield (49.8 mg), and >99:1 rr was detected by GC.

<sup>1</sup>H NMR (500 MHz, CDCl<sub>3</sub>) δ 7.64 – 7.56 (m, 1H), 7.24 – 7.17 (m, 1H), 7.15 – 7.08 (m, 1H), 7.05 – 6.93 (m, 1H), 4.07 (dd, *J* = 8.2, 5.9 Hz, 1H), 1.76 – 1.64 (m, 2H), 1.58 – 1.44 (m, 2H), 1.13 – 1.07 (m, 21H), 0.94 (t, *J* = 7.3 Hz, 3H);

<sup>13</sup>C NMR (126 MHz, CDCl<sub>3</sub>) δ 160.0 (d, *J* = 246.1 Hz), 129.4 (d, *J* = 4.1 Hz), 129.3, 128.2 (d, *J* = 8.1 Hz), 124.1 (d, *J* = 3.5 Hz), 115.2 (d, *J* = 22.3 Hz), 109.1, 83.1, 39.7,

31.9 (d,  $J = 3.3$  Hz), 20.5, 18.8, 13.8, 11.4;

$^{19}\text{F}$  NMR (471 MHz,  $\text{CDCl}_3$ )  $\delta$  -119.8;

HRMS (ESI) calcd. for  $\text{C}_{21}\text{H}_{33}\text{FSiNa}$   $[\text{M}+\text{Na}]^+$   $m/z$  355.2228, found 355.2224;

IR (neat,  $\text{cm}^{-1}$ ) 2957, 2864, 2169, 1228, 882, 675.

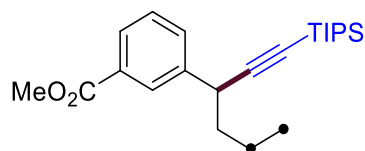

**Methyl 3-(1-(triisopropylsilyl)hex-1-yn-3-yl)benzoate** (Figure 3, **3g**). From **methyl 3-(but-3-en-1-yl)benzoate** (**1g**) (38.0 mg, 0.20 mmol), and **(bromoethynyl)triisopropylsilane** (**2a**) (78.4 mg, 0.30 mmol), the title compound was prepared following the general procedure **A** using  $\text{NiI}_2 \cdot x\text{H}_2\text{O}$  (3.8 mg, 5.0 mol%), **L** (4.3 mg, 6.0 mol%),  $\text{Na}_2\text{CO}_3$  (42.4 mg, 2.0 equiv), NaI (3.0 mg, 10 mol%), PMHS (60.0  $\mu\text{L}$ , 5.0 equiv) and anhydrous diglyme (1.0 mL). The reaction mixture was stirred for 16 h at 25 °C. The crude material was purified by flash column chromatography (petroleum ether/EtOAc = 50:1) to provide the title compound as a colorless liquid in 82% yield (61.0 mg), and >99:1 rr was detected by GC.

$^1\text{H}$  NMR (500 MHz,  $\text{CDCl}_3$ )  $\delta$  8.11 – 8.06 (m, 1H), 7.94 – 7.87 (m, 1H), 7.61 – 7.54 (m, 1H), 7.39 (t,  $J = 7.7$  Hz, 1H), 3.91 (s, 3H), 3.76 (t,  $J = 7.2$  Hz, 1H), 1.80 – 1.67 (m, 2H), 1.55 – 1.36 (m, 2H), 1.13 – 1.05 (m, 21H), 0.93 (t,  $J = 7.4$  Hz, 3H);

$^{13}\text{C}$  NMR (126 MHz,  $\text{CDCl}_3$ )  $\delta$  167.2, 142.8, 132.1, 130.3, 128.8, 128.5, 127.9, 109.4, 83.9, 52.1, 41.1, 38.5, 20.5, 18.7, 13.8, 11.4;

HRMS (ESI) calcd. for  $\text{C}_{23}\text{H}_{36}\text{O}_2\text{SiNa}$   $[\text{M}+\text{Na}]^+$   $m/z$  395.2377, found 395.2374;

IR (neat,  $\text{cm}^{-1}$ ) 2941, 2864, 2168, 1462, 855, 675.

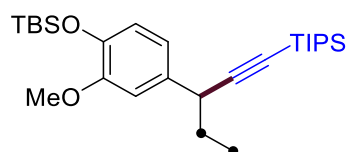

**tert-Butyl(2-methoxy-4-(1-(triisopropylsilyl)pent-1-yn-3-yl)phenoxy)dimethylsilane** (Figure 3, **3h**). From **(4-allyl-2-methoxyphenoxy)(tert-**

**butyl**dimethylsilane (**1h**) (55.7 mg, 0.20 mmol), and **(bromoethynyl)triisopropylsilane (2a)** (78.4 mg, 0.30 mmol), the title compound was prepared following the general procedure **A** using  $\text{NiI}_2 \cdot x\text{H}_2\text{O}$  (3.8 mg, 5.0 mol%), **L** (4.3 mg, 6.0 mol%),  $\text{Na}_2\text{CO}_3$  (42.4 mg, 2.0 equiv), NaI (3.0 mg, 10 mol%), PMHS (60.0  $\mu\text{L}$ , 5.0 equiv) and anhydrous DME (1.0 mL). The reaction mixture was stirred for 16 h at 25 °C. The crude material was purified by flash column chromatography (petroleum ether/EtOAc = 100:1) to provide the title compound as a colorless liquid in 57% yield (52.4 mg), and >99:1 rr was detected by GC.

$^1\text{H NMR}$  (500 MHz,  $\text{CDCl}_3$ )  $\delta$  6.98 (d,  $J = 1.8$  Hz, 1H), 6.81 – 6.73 (m, 2H), 3.80 (s, 3H), 3.61 (dd,  $J = 8.2, 5.4$  Hz, 1H), 1.86 – 1.65 (m, 2H), 1.13 – 1.07 (m, 21H), 1.03 – 0.96 (m, 12H), 0.16 (s, 3H), 0.16 (s, 3H);

$^{13}\text{C NMR}$  (126 MHz,  $\text{CDCl}_3$ )  $\delta$  150.7, 143.5, 135.5, 120.5, 119.7, 111.5, 110.5, 83.2, 55.4, 40.1, 32.2, 25.8, 18.8, 18.5, 11.7, 11.4, -4.4, -4.5;

**HRMS** (ESI) calcd. for  $\text{C}_{27}\text{H}_{48}\text{O}_2\text{Si}_2\text{Na}$   $[\text{M}+\text{Na}]^+$   $m/z$  483.3085, found 483.3082;

**IR** (neat,  $\text{cm}^{-1}$ ) 2938, 2863, 2166, 1463, 1282, 728.

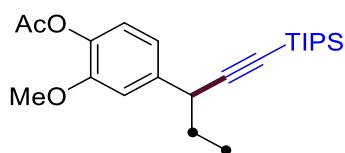

**2-Methoxy-4-(1-(triisopropylsilyl)pent-1-yn-3-yl)phenyl acetate** (Figure 3, **3i**).

From **4-allyl-2-methoxyphenyl acetate (1i)** (41.2 mg, 0.20 mmol), and **(bromoethynyl)triisopropylsilane (2a)** (78.4 mg, 0.30 mmol), the title compound was prepared following the general procedure **A** using  $\text{NiI}_2 \cdot x\text{H}_2\text{O}$  (3.8 mg, 5.0 mol%), **L** (4.3 mg, 6.0 mol%),  $\text{Na}_2\text{CO}_3$  (42.4 mg, 2.0 equiv), NaI (3.0 mg, 10 mol%), PMHS (60.0  $\mu\text{L}$ , 5.0 equiv) and anhydrous diglyme (1.0 mL). The reaction mixture was stirred for 16 h at 25 °C. The crude material was purified by flash column chromatography (petroleum ether/EtOAc = 100:1) to provide the title compound as a colorless liquid in 78% yield (60.8 mg), and >99:1 rr was detected by GC.

$^1\text{H NMR}$  (500 MHz,  $\text{CDCl}_3$ )  $\delta$  7.11 (d,  $J = 2.0$  Hz, 1H), 6.97 (d,  $J = 8.1$  Hz, 1H), 6.90 (dd,  $J = 8.1, 2.0$  Hz, 1H), 3.83 (s, 3H), 3.66 (dd,  $J = 8.5, 5.3$  Hz, 1H), 2.31 (s, 3H), 1.88

– 1.78 (m, 1H), 1.77 – 1.68 (m, 1H), 1.14 – 1.07 (m, 21H), 1.05 (t,  $J = 7.3$  Hz, 3H);

$^{13}\text{C}$  NMR (126 MHz,  $\text{CDCl}_3$ )  $\delta$  169.2, 150.8, 140.9, 138.2, 122.4, 119.7, 111.8, 109.5, 83.8, 55.8, 40.4, 32.2, 20.8, 18.8, 11.8, 11.4;

HRMS (ESI) calcd. for  $\text{C}_{23}\text{H}_{36}\text{O}_3\text{SiNa}$   $[\text{M}+\text{Na}]^+$   $m/z$  411.2326, found 411.2322;

IR (neat,  $\text{cm}^{-1}$ ) 2958, 2864, 2167, 1462, 881, 673.

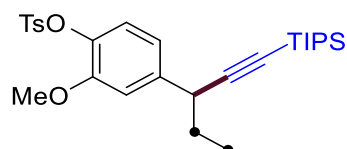

**2-Methoxy-4-(1-(triisopropylsilyl)pent-1-yn-3-yl)phenyl** **4-**

**methylbenzenesulfonate** (Figure 3, **3j**). From **4-allyl-2-methoxyphenyl** **4-**

**methylbenzenesulfonate** (**1j**) (63.7 mg, 0.20 mmol), and

**(bromoethynyl)triisopropylsilane** (**2a**) (78.4 mg, 0.30 mmol), the title compound was

prepared following the general procedure **A** using  $\text{NiI}_2 \cdot x\text{H}_2\text{O}$  (3.8 mg, 5.0 mol%), **L**

(4.3 mg, 6.0 mol%),  $\text{Na}_2\text{CO}_3$  (42.4 mg, 2.0 equiv), NaI (3.0 mg, 10 mol%), PMHS (60.0

$\mu\text{L}$ , 5.0 equiv) and anhydrous diglyme (1.0 mL). The reaction mixture was stirred for

16 h at 25 °C. The crude material was purified by flash column chromatography

(petroleum ether/EtOAc = 100:1) to provide the title compound as a colorless liquid in

99% yield (98.7 mg), and >99:1 rr was detected by GC.

$^1\text{H}$  NMR (500 MHz,  $\text{CDCl}_3$ )  $\delta$  7.77 – 7.70 (m, 2H), 7.28 (d,  $J = 8.1$  Hz, 2H), 7.07 (d,

$J = 8.3$  Hz, 1H), 6.96 (d,  $J = 2.0$  Hz, 1H), 6.83 (dd,  $J = 8.3, 2.0$  Hz, 1H), 3.61 (dd,  $J =$

8.3, 5.3 Hz, 1H), 3.52 (s, 3H), 2.43 (s, 3H), 1.83 – 1.73 (m, 1H), 1.73 – 1.63 (m, 1H),

1.08 (t,  $J = 2.2$  Hz, 21H), 1.00 (t,  $J = 7.3$  Hz, 3H);

$^{13}\text{C}$  NMR (126 MHz,  $\text{CDCl}_3$ )  $\delta$  151.5, 144.9, 142.3, 136.9, 133.3, 129.3, 128.7, 123.7,

119.6, 111.9, 109.3, 84.0, 55.4, 40.3, 32.0, 21.7, 18.7, 11.6, 11.3;

HRMS (ESI) calcd. for  $\text{C}_{28}\text{H}_{40}\text{O}_4\text{SSiNa}$   $[\text{M}+\text{Na}]^+$   $m/z$  523.2309, found 523.2304;

IR (neat,  $\text{cm}^{-1}$ ) 2942, 2865, 2168, 1373, 1092, 649.

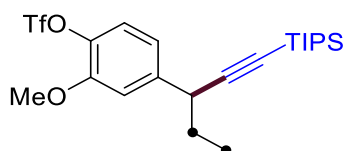

**2-Methoxy-4-(1-(triisopropylsilyl)pent-1-yn-3-yl)phenyl trifluoromethanesulfonate** (Figure 3, **3k**). From **4-allyl-2-methoxyphenyl trifluoromethanesulfonate** (**1k**) (59.2 mg, 0.20 mmol), and **(bromoethynyl)triisopropylsilane** (**2a**) (78.4 mg, 0.30 mmol), the title compound was prepared following the general procedure **A** using  $\text{NiI}_2 \cdot x\text{H}_2\text{O}$  (3.8 mg, 5.0 mol%), **L** (4.3 mg, 6.0 mol%),  $\text{Na}_2\text{CO}_3$  (42.4 mg, 2.0 equiv), NaI (3.0 mg, 10 mol%), PMHS (60.0  $\mu\text{L}$ , 5.0 equiv) and anhydrous diglyme (1.0 mL). The reaction mixture was stirred for 16 h at 25 °C. The crude material was purified by flash column chromatography (petroleum ether/EtOAc = 100:1) to provide the title compound as a colorless liquid in 96% yield (91.4 mg), and >99:1 rr was detected by GC.

$^1\text{H NMR}$  (500 MHz,  $\text{CDCl}_3$ )  $\delta$  7.18 (d,  $J = 2.0$  Hz, 1H), 7.15 (d,  $J = 8.2$  Hz, 1H), 6.93 (dd,  $J = 8.4, 2.0$  Hz, 1H), 3.91 (s, 3H), 3.69 (dd,  $J = 8.4, 5.3$  Hz, 1H), 1.88 – 1.78 (m, 1H), 1.76 – 1.67 (m, 1H), 1.12 – 1.10 (m, 21H), 1.05 (t,  $J = 7.3$  Hz, 3H);

$^{13}\text{C NMR}$  (126 MHz,  $\text{CDCl}_3$ )  $\delta$  151.2, 143.8, 137.3, 122.1, 119.9, 118.9 (q,  $J = 321.3$  Hz), 112.5, 108.8, 84.6, 56.1, 40.4, 32.1, 18.8, 11.7, 11.4;

$^{19}\text{F NMR}$  (471 MHz,  $\text{CDCl}_3$ )  $\delta$  -73.9;

**HRMS** (ESI) calcd. for  $\text{C}_{22}\text{H}_{33}\text{F}_3\text{O}_4\text{SSiNa}$   $[\text{M}+\text{Na}]^+$   $m/z$  501.1713, found 501.1709;

**IR** (neat,  $\text{cm}^{-1}$ ) 2941, 2865, 2169, 1503, 1205, 881.

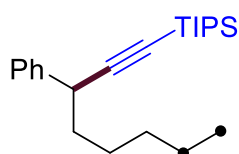

**Triisopropyl(3-phenyloct-1-yn-1-yl)silane** (Figure 3, **3l**). From **hex-5-en-1-ylbenzene** (**1l**) (32.1 mg, 0.20 mmol) and **(bromoethynyl)triisopropylsilane** (**2a**) (78.4 mg, 0.30 mmol), the title compound was prepared following the general procedure **A** using  $\text{NiI}_2 \cdot x\text{H}_2\text{O}$  (7.6 mg, 10.0 mol%), **L** (8.6 mg, 12.0 mol%),  $\text{Na}_2\text{CO}_3$  (42.4 mg, 2.0 equiv), NaI (6.0 mg, 20 mol%), PMHS (60.0  $\mu\text{L}$ , 5.0 equiv) and

anhydrous DME (2.0 mL). The reaction mixture was stirred for 16 h at 25 °C. The crude material was purified by flash column chromatography (petroleum ether) to provide the title compound as a colorless liquid in 44% yield (30.3 mg), and >99:1 rr was detected by GC.

<sup>1</sup>H NMR (400 MHz, CDCl<sub>3</sub>) δ 7.42 – 7.35 (m, 2H), 7.36 – 7.27 (m, 2H), 7.27 – 7.17 (m, 1H), 3.69 (dd, *J* = 7.8, 6.4 Hz, 1H), 1.78 – 1.64 (m, 2H), 1.53 – 1.42 (m, 2H), 1.33 – 1.26 (m, 4H), 1.13 – 1.00 (m, 21H), 0.91 – 0.85 (m, 3H);

<sup>13</sup>C NMR (101 MHz, CDCl<sub>3</sub>) δ 142.5, 128.4, 127.5, 126.5, 110.2, 83.2, 39.2, 39.0, 31.6, 27.0, 22.6, 18.8, 14.1, 11.4;

HRMS (ESI) calcd. for C<sub>23</sub>H<sub>38</sub>SiNa [M+Na]<sup>+</sup> *m/z* 365.2635, found 365.2636;

IR (neat, cm<sup>-1</sup>) 2939, 2863, 2167, 1462, 882, 663.

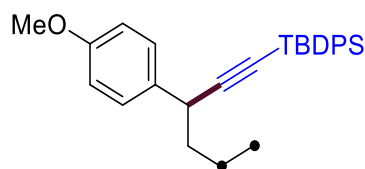

**tert-Butyldiphenyl(3-phenylhex-1-yn-1-yl)silane** (Figure 3, **3m**). From **1-(but-3-en-1-yl)-4-methoxybenzene** (**1m**) (32.4 mg, 0.20 mmol), and **(bromoethynyl)(tert-butyl)diphenylsilane** (**2b**) (103.0 mg, 0.30 mmol), the title compound was prepared following the general procedure A using NiI<sub>2</sub>·xH<sub>2</sub>O (3.8 mg, 5.0 mol%), **L** (4.3 mg, 6.0 mol%), Na<sub>2</sub>CO<sub>3</sub> (42.4 mg, 2.0 equiv), NaI (3.0 mg, 10 mol%), PMHS (60.0 μL, 5.0 equiv) and anhydrous diglyme (1.0 mL). The reaction mixture was stirred for 16 h at 25 °C. The crude material was purified by flash column chromatography (petroleum ether) to provide the title compound as a colorless liquid in 95% yield (80.9 mg), and >99:1 rr was detected by GC.

<sup>1</sup>H NMR (500 MHz, CDCl<sub>3</sub>) 8.14 – 7.62 (m, 4H), 7.43 – 7.32 (m, 8H), 6.94 – 6.85 (m, 2H), 3.87 – 3.70 (m, 4H), 1.90 – 1.71 (m, 2H), 1.63 – 1.46 (m, 2H), 1.11 (s, 9H), 0.97 (t, *J* = 7.4 Hz, 3H);

<sup>13</sup>C NMR (126 MHz, CDCl<sub>3</sub>) δ 158.4, 135.7, 134.1, 134.0, 133.9, 129.4, 128.6, 127.7, 113.9, 113.3, 82.0, 55.4, 41.2, 38.1, 27.2, 20.7, 18.7, 13.9;

**HRMS** (ESI) calcd. for C<sub>29</sub>H<sub>35</sub>OSi [M+H]<sup>+</sup> *m/z* 427.2452, found 427.2446;

**IR** (neat, cm<sup>-1</sup>) 2956, 2856, 2168, 1509, 1248, 697.

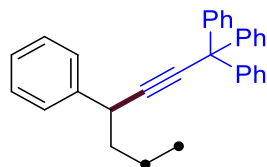

**Hept-2-yne-1,1,1,4-tetrayltetrabenzene** (Figure 3, **3n**). From **4-phenyl-1-butene** (**1n**) (26.4 mg, 0.20 mmol) and **(3-bromoprop-2-yne-1,1,1-triyl)tribenzene** (**2c**) (104.2 mg, 0.30 mmol), the title compound was prepared following the general procedure **A** using NiI<sub>2</sub>·xH<sub>2</sub>O (3.8 mg, 5.0 mol%), **L** (4.3 mg, 6.0 mol%), Na<sub>2</sub>CO<sub>3</sub> (42.4 mg, 2.0 equiv), NaI (3.0 mg, 10.0 mol%), PMHS (60 μL, 1.0 mmol, 5.0 equiv) and anhydrous diglyme (1.0 mL). The reaction mixture was stirred for 16 h at 25 °C. The crude material was purified by flash column chromatography (petroleum ether) to provide the title compound as a colorless liquid in 40% yield (31.8 mg), and >99:1 rr was detected by GC.

**<sup>1</sup>H NMR** (500 MHz, CDCl<sub>3</sub>) δ 7.40 – 7.37 (m, 2H), 7.33 – 7.20 (m, 18H), 3.83 (dd, *J* = 8.4, 6.0 Hz, 1H), 1.90 – 1.74 (m, 2H), 1.54 – 1.43 (m, 2H), 0.93 (t, *J* = 7.4 Hz, 3H);

**<sup>13</sup>C NMR** (126 MHz, CDCl<sub>3</sub>) δ 145.9, 142.8, 129.3, 128.4, 127.9, 127.6, 126.7, 126.5, 89.0, 87.0, 55.8, 41.2, 38.0, 20.7, 13.9;

**HRMS** (ESI) calcd. for C<sub>31</sub>H<sub>28</sub>Na [M+Na]<sup>+</sup> *m/z* 423.2083, found 423.2090;

**IR** (neat, cm<sup>-1</sup>) 2957, 2929, 1490, 1446, 756, 696;

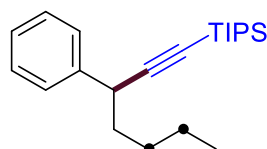

**Triisopropyl(3-phenylhept-1-yn-1-yl)silane** (Figure 3, **3o**). From **pent-3-en-1-ylbenzene** (**1o**) (29.2 mg, 0.20 mmol) and **(bromoethynyl)triisopropylsilane** (**2a**) (78.4 mg, 0.30 mmol), the title compound was prepared following the general procedure **A** using NiI<sub>2</sub>·xH<sub>2</sub>O (3.8 mg, 5.0 mol%), **L** (4.3 mg, 6.0 mol%), Na<sub>2</sub>CO<sub>3</sub> (42.4

mg, 2.0 equiv), NaI (3.0 mg, 10.0 mol%), PMHS (60  $\mu$ L, 1.0 mmol, 5.0 equiv) and anhydrous diglyme (1.0 mL). The reaction mixture was stirred for 16 h at 25  $^{\circ}$ C. The crude material was purified by flash column chromatography (petroleum ether) to provide the title compound as a colorless liquid in 71% yield (46.6 mg), and >99:1 rr was detected by GC.

$^1\text{H NMR}$  (500 MHz,  $\text{CDCl}_3$ )  $\delta$  7.41 – 7.37 (m, 2H), 7.34 – 7.29 (m, 2H), 7.25 – 7.19 (m, 1H), 3.70 (dd,  $J = 8.1, 6.2$  Hz, 1H), 1.82 – 1.69 (m, 2H), 1.52 – 1.42 (m, 2H), 1.40 – 1.25 (m, 2H), 1.20 – 1.05 (m, 21 H), 0.89 (t,  $J = 7.3$  Hz, 3H);

$^{13}\text{C NMR}$  (126 MHz,  $\text{CDCl}_3$ )  $\delta$  142.5, 128.4, 127.5, 126.5, 110.2, 83.2, 39.0, 38.9, 29.6, 22.4, 18.8, 14.1, 11.4;

**HRMS** (ESI) calcd. for  $\text{C}_{22}\text{H}_{36}\text{SiNa}$   $[\text{M}+\text{Na}]^+$   $m/z$  351.2478, found 351.2477;

**IR** (neat,  $\text{cm}^{-1}$ ) 2940, 2864, 2168, 1462, 738, 664.

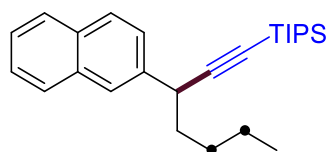

**Triisopropyl(3-(naphthalen-2-yl)hept-1-yn-1-yl)silane** (Figure 3, **3p**). From **2-(pent-3-en-1-yl)naphthalene** (**1p**) (39.3 mg, 0.20 mmol) and **(bromoethynyl)triisopropylsilane** (**2a**) (78.4 mg, 0.30 mmol), the title compound was prepared following the general procedure **A** using  $\text{NiI}_2 \cdot x\text{H}_2\text{O}$  (3.8 mg, 5.0 mol%), **L** (4.3 mg, 6.0 mol%),  $\text{Na}_2\text{CO}_3$  (42.4 mg, 2.0 equiv), NaI (3.0 mg, 10.0 mol%), PMHS (60  $\mu$ L, 1.0 mmol, 5.0 equiv) and anhydrous DME (1.0 mL). The reaction mixture was stirred for 16 h at 25  $^{\circ}$ C. The crude material was purified by flash column chromatography (petroleum ether) to provide the title compound as a colorless liquid in 84% yield (63.8 mg), and >99:1 rr was detected by GC.

$^1\text{H NMR}$  (500 MHz,  $\text{CDCl}_3$ )  $\delta$  7.89 – 7.85 (m, 1H), 7.84 – 7.77 (m, 3H), 7.53 – 7.38 (m, 3H), 3.86 (dd,  $J = 7.9, 6.2$  Hz, 1H), 1.88 – 1.77 (m, 2H), 1.54 – 1.46 (m, 2H), 1.42 – 1.29 (m, 2H), 1.17 – 1.08 (m, 21H), 0.90 (t,  $J = 7.3$  Hz, 3H);

$^{13}\text{C NMR}$  (126 MHz,  $\text{CDCl}_3$ )  $\delta$  139.8, 133.5, 132.4, 128.0, 127.8, 127.7, 126.1, 126.0,



125.5, 110.2, 83.5, 39.1, 38.6, 29.6, 22.5, 18.8, 14.1, 11.5;

**HRMS** (ESI) calcd. for C<sub>26</sub>H<sub>38</sub>SiNa [M+Na]<sup>+</sup> m/z 401.2635, found 401.2637;

**IR** (neat, cm<sup>-1</sup>) 2939, 2863, 2167, 1462, 882, 674.

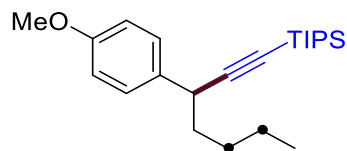

**Triisopropyl(3-(4-methoxyphenyl)hept-1-yn-1-yl)silane** (Figure 3, **3q**). From **1-methoxy-4-(pent-3-en-1-yl)benzene** (**1q**) (35.3 mg, 0.20 mmol) and **(bromoethynyl)triisopropylsilane** (**2a**) (78.4 mg, 0.30 mmol), the title compound was prepared following the general procedure **A** using NiI<sub>2</sub>·xH<sub>2</sub>O (3.8 mg, 5.0 mol%), **L** (4.3 mg, 6.0 mol%), Na<sub>2</sub>CO<sub>3</sub> (42.4 mg, 2.0 equiv), NaI (3.0 mg, 10.0 mol%), PMHS (60 μL, 1.0 mmol, 5.0 equiv) and anhydrous DME (2.0 mL). The reaction mixture was stirred for 16 h at 25 °C. The crude material was purified by flash column chromatography (petroleum ether) to provide the title compound as a colorless liquid in 70% yield (50.0 mg), and >99:1 rr was detected by GC.

**<sup>1</sup>H NMR** (500 MHz, CDCl<sub>3</sub>) δ 7.31 – 7.27 (m, 2H), 6.88 – 6.79 (m, 2H), 3.80 (s, 3H), 3.64 (dd, *J* = 7.8, 6.5 Hz, 1H), 1.75 – 1.65 (m, 2H), 1.48 – 1.40 (m, 2H), 1.36 – 1.27 (m, 2H), 1.12 – 1.01 (m, 21H), 0.88 (t, *J* = 7.3 Hz, 3H);

**<sup>13</sup>C NMR** (126 MHz, CDCl<sub>3</sub>) δ 158.2, 134.6, 128.5, 113.7, 110.6, 82.9, 55.4, 39.0, 38.1, 29.5, 22.5, 18.9, 18.8, 14.1, 11.4;

**HRMS** (ESI) calcd. for C<sub>23</sub>H<sub>38</sub>OSiNa [M+Na]<sup>+</sup> m/z 381.2584, found 381.2581;

**IR** (neat, cm<sup>-1</sup>) 2940, 2864, 2167, 1510, 1247, 677.

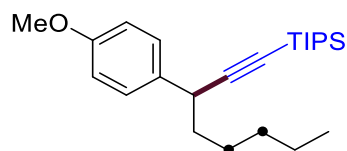

**Triisopropyl(3-(4-methoxyphenyl)oct-1-yn-1-yl)silane** (Figure 3, **3r**). From **1-(hex-3-en-1-yl)-4-methoxybenzene** (**1r**) (38.1 mg, 0.20 mmol) and **(bromoethynyl)triisopropylsilane** (**2a**) (78.4 mg, 0.30 mmol), the title compound was

prepared following the general procedure **A** using  $\text{NiI}_2 \cdot x\text{H}_2\text{O}$  (3.8 mg, 5.0 mol%), **L** (4.3 mg, 6.0 mol%),  $\text{Na}_2\text{CO}_3$  (42.4 mg, 2.0 equiv), NaI (3.0 mg, 10.0 mol%), PMHS (60  $\mu\text{L}$ , 1.0 mmol, 5.0 equiv) and anhydrous DME (2.0 mL). The reaction mixture was stirred for 16 h at 25 °C. The crude material was purified by flash column chromatography (petroleum ether/EtOAc = 100:1) to provide the title compound as a colorless liquid in 77% yield (57.6 mg), and >99:1 rr was detected by GC.

$^1\text{H NMR}$  (500 MHz,  $\text{CDCl}_3$ )  $\delta$  7.32 – 7.27 (m, 2H), 6.90 – 6.82 (m, 2H), 3.80 (s, 3H), 3.70 – 3.55 (m, 1H), 1.73 – 1.65 (m, 2H), 1.52 – 1.41 (m, 2H), 1.34 – 1.24 (m, 4H), 1.14 – 1.02 (m, 21H), 0.92 – 0.83 (m, 3H);

$^{13}\text{C NMR}$  (126 MHz,  $\text{CDCl}_3$ )  $\delta$  158.2, 134.6, 128.5, 113.7, 110.6, 82.9, 55.4, 39.3, 38.1, 31.6, 27.0, 22.7, 18.9, 18.8, 14.1, 11.4;

**HRMS** (ESI) calcd. for  $\text{C}_{24}\text{H}_{40}\text{OSiNa}$   $[\text{M}+\text{Na}]^+$   $m/z$  395.2741, found 395.2743;

**IR** (neat,  $\text{cm}^{-1}$ ) 2937, 2863, 2167, 1510, 1245, 667.

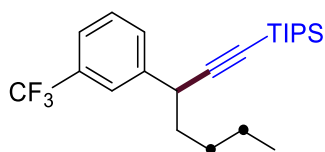

**Triisopropyl(3-(3-(trifluoromethyl)phenyl)hept-1-yn-1-yl)silane** (Figure 3, **3s**).

From **1-(pent-3-en-1-yl)-3-(trifluoromethyl)benzene** (**1s**) (42.8 mg, 0.20 mmol) and **(bromoethynyl)triisopropylsilane** (**2a**) (78.4 mg, 0.30 mmol), the title compound was prepared following the general procedure **A** using  $\text{NiI}_2 \cdot x\text{H}_2\text{O}$  (3.8 mg, 5.0 mol%), **L** (4.3 mg, 6.0 mol%),  $\text{Na}_2\text{CO}_3$  (42.4 mg, 2.0 equiv), NaI (3.0 mg, 10.0 mol%), PMHS (60  $\mu\text{L}$ , 1.0 mmol, 5.0 equiv) and anhydrous diglyme (1.0 mL). The reaction mixture was stirred for 16 h at 25 °C. The crude material was purified by flash column chromatography (petroleum ether) to provide the title compound as a colorless liquid in 69% yield (54.9 mg), and >99:1 rr was detected by GC.

$^1\text{H NMR}$  (500 MHz,  $\text{CDCl}_3$ )  $\delta$  7.73 – 7.70 (m, 1H), 7.56 – 7.51 (m, 1H), 7.50 – 7.47 (m, 1H), 7.45 – 7.40 (m, 1H), 3.75 (dd,  $J = 8.3, 6.1$  Hz, 1H), 1.80 – 1.65 (m, 2H), 1.53 – 1.43 (m, 2H), 1.40 – 1.28 (m, 2H), 1.12 – 1.07 (m, 21H), 0.90 (t,  $J = 7.3$  Hz, 3H);

$^{13}\text{C}$  NMR (126 MHz,  $\text{CDCl}_3$ )  $\delta$  143.5, 130.9, 130.8 (q,  $J = 32.2$  Hz), 128.8, 124.4 (q,  $J = 3.9$  Hz), 124.3 (q,  $J = 272.7$  Hz), 123.5 (q,  $J = 3.9$  Hz), 109.0, 84.4, 38.8, 38.7, 29.5, 22.4, 18.7, 14.1, 11.4;

$^{19}\text{F}$  NMR (471 MHz,  $\text{CDCl}_3$ )  $\delta$  -62.6;

HRMS (ESI) calcd. for  $\text{C}_{23}\text{H}_{35}\text{F}_3\text{SiNa}$   $[\text{M}+\text{Na}]^+$   $m/z$  419.2352, found 419.2351;

IR (neat,  $\text{cm}^{-1}$ ) 2941, 2865, 2170, 1325, 1126, 663.

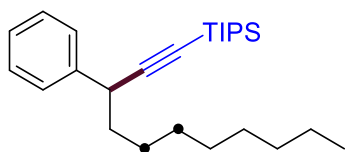

**Triisopropyl(3-phenylundec-1-yn-1-yl)silane** (Figure 3, **3t**). From **non-3-en-1-ylbenzene** (**1t**) (40.5 mg, 0.20 mmol) and **(bromoethynyl)triisopropylsilane** (**2a**) (78.4 mg, 0.30 mmol), the title compound was prepared following the general procedure **A** using  $\text{NiI}_2 \cdot x\text{H}_2\text{O}$  (3.8 mg, 5.0 mol%), **L** (4.3 mg, 6.0 mol%),  $\text{Na}_2\text{CO}_3$  (42.4 mg, 2.0 equiv), NaI (3.0 mg, 10.0 mol%), PMHS (60  $\mu\text{L}$ , 1.0 mmol, 5.0 equiv) and anhydrous DME (2.0 mL). The reaction mixture was stirred for 16 h at 25  $^\circ\text{C}$ . The crude material was purified by flash column chromatography (petroleum ether) to provide the title compound as a colorless liquid in 85% yield (65.5 mg), and >99:1 rr was detected by GC.

$^1\text{H}$  NMR (500 MHz,  $\text{CDCl}_3$ )  $\delta$  7.40 – 7.36 (m, 2H), 7.34 – 7.29 (m, 2H), 7.24 – 7.19 (m, 1H), 3.69 (dd,  $J = 8.2, 6.2$  Hz, 1H), 1.78 – 1.65 (m, 2H), 1.52 – 1.39 (m, 2H), 1.35 – 1.16 (m, 10H), 1.13 – 1.05 (m, 21H), 0.87 (t,  $J = 6.9$  Hz, 3H);

$^{13}\text{C}$  NMR (126 MHz,  $\text{CDCl}_3$ )  $\delta$  142.5, 128.4, 127.5, 126.5, 110.2, 83.2, 39.2, 39.0, 32.0, 29.6, 29.3, 27.4, 22.8, 18.8, 14.2, 11.4;

HRMS (ESI) calcd. for  $\text{C}_{26}\text{H}_{44}\text{SiNa}$   $[\text{M}+\text{Na}]^+$   $m/z$  407.3104, found 407.3105;

IR (neat,  $\text{cm}^{-1}$ ) 2924, 2856, 2168, 1454, 966, 696.

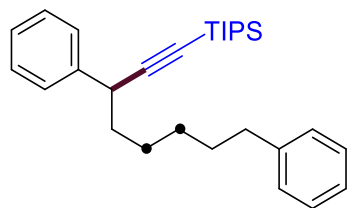

**(3,8-Diphenyloct-1-yn-1-yl)triisopropylsilane** (Figure 3, **3u**). From **1,6-diphenylhex-3-ene (1u)** (47.3 mg, 0.20 mmol) and **(bromoethynyl)triisopropylsilane (2a)** (78.4 mg, 0.30 mmol), the title compound was prepared following the general procedure **A** using  $\text{NiI}_2 \cdot x\text{H}_2\text{O}$  (3.8 mg, 5.0 mol%), **L** (4.3 mg, 6.0 mol%),  $\text{Na}_2\text{CO}_3$  (42.4 mg, 2.0 equiv), NaI (3.0 mg, 10.0 mol%), PMHS (60  $\mu\text{L}$ , 1.0 mmol, 5.0 equiv) and anhydrous DME (1.0 mL). The reaction mixture was stirred for 16 h at 25  $^\circ\text{C}$ . The crude material was purified by flash column chromatography (petroleum ether) to provide the title compound as a colorless liquid in 89% yield (74.7 mg), and >99:1 rr was detected by GC.

$^1\text{H NMR}$  (500 MHz,  $\text{CDCl}_3$ )  $\delta$  7.40 – 7.37 (m, 2H), 7.34 – 7.30 (m, 2H), 7.30 – 7.26 (m, 2H), 7.25 – 7.21 (m, 1H), 7.20 – 7.15 (m, 3H), 3.70 (dd,  $J = 8.0, 6.2$  Hz, 1H), 2.63 – 2.57 (m, 2H), 1.83 – 1.70 (m, 2H), 1.66 – 1.58 (m, 2H), 1.57 – 1.50 (m, 2H), 1.43 – 1.31 (m, 2H), 1.13 – 1.07 (m, 21H);

$^{13}\text{C NMR}$  (126 MHz,  $\text{CDCl}_3$ )  $\delta$  142.9, 142.3, 128.5, 128.4, 128.3, 127.5, 126.5, 125.7, 110.1, 83.3, 39.1, 38.9, 35.9, 31.5, 29.0, 27.2, 18.8, 11.4;

**HRMS** (ESI) calcd. for  $\text{C}_{29}\text{H}_{42}\text{SiNa}$   $[\text{M}+\text{Na}]^+$   $m/z$  441.2948, found 441.2953;

**IR** (neat,  $\text{cm}^{-1}$ ) 2937, 2862, 2167, 1453, 882, 697.

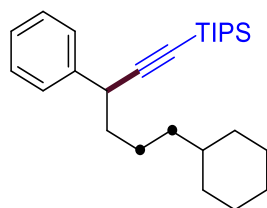

**(6-Cyclohexyl-3-phenylhex-1-yn-1-yl)triisopropylsilane** (Figure 3, **3v**). From **(4-cyclohexylbut-3-en-1-yl)benzene (1v)** (42.9 mg, 0.20 mmol) and **(bromoethynyl)triisopropylsilane (2a)** (78.4 mg, 0.30 mmol), the title compound was

prepared following the general procedure **A** using  $\text{NiI}_2 \cdot x\text{H}_2\text{O}$  (3.8 mg, 5.0 mol%), **L** (4.3 mg, 6.0 mol%),  $\text{Na}_2\text{CO}_3$  (42.4 mg, 2.0 equiv), NaI (3.0 mg, 10.0 mol%), PMHS (60  $\mu\text{L}$ , 1.0 mmol, 5.0 equiv) and anhydrous diglyme (1.0 mL). The reaction mixture was stirred for 16 h at 25 °C. The crude material was purified by flash column chromatography (petroleum ether) to provide the title compound as a colorless liquid in 83% yield (65.8 mg), and >99:1 rr was detected by GC.

$^1\text{H NMR}$  (500 MHz,  $\text{CDCl}_3$ )  $\delta$  7.40 – 7.36 (m, 2H), 7.33 – 7.28 (m, 2H), 7.24 – 7.19 (m, 1H), 3.77 – 3.63 (m, 1H), 1.73 – 1.60 (m, 7H), 1.54 – 1.40 (m, 2H), 1.24 – 1.13 (m, 6H), 1.12 – 1.04 (m, 21H), 0.91 – 0.78 (m, 2H);

$^{13}\text{C NMR}$  (126 MHz,  $\text{CDCl}_3$ )  $\delta$  142.5, 128.4, 127.5, 126.5, 110.2, 83.2, 39.5, 39.0, 37.6, 37.1, 33.5, 33.4, 26.8, 26.6, 26.5, 24.7, 18.9, 18.8, 11.4;

**HRMS** (ESI) calcd. for  $\text{C}_{27}\text{H}_{44}\text{SiNa}$   $[\text{M}+\text{Na}]^+$   $m/z$  419.3104, found 419.3101;

**IR** (neat,  $\text{cm}^{-1}$ ) 2921, 2862, 2168, 1450, 882, 664.

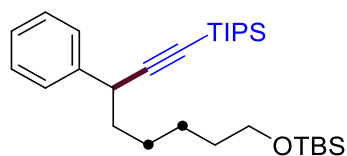

**tert-Butyldimethyl((6-phenyl-8-(triisopropylsilyl)oct-7-yn-1-yl)oxy)silane** (Figure 3, **3w**). From **tert-butyldimethyl((6-phenylhex-3-en-1-yl)oxy)silane** (**1w**) (58.1 mg, 0.20 mmol) and **(bromoethynyl)triisopropylsilane** (**2a**) (78.4 mg, 0.30 mmol), the title compound was prepared following the general procedure **A** using  $\text{NiI}_2 \cdot x\text{H}_2\text{O}$  (3.8 mg, 5.0 mol%), **L** (4.3 mg, 6.0 mol%),  $\text{Na}_2\text{CO}_3$  (42.4 mg, 2.0 equiv), NaI (3.0 mg, 10.0 mol%), PMHS (60  $\mu\text{L}$ , 1.0 mmol, 5.0 equiv) and anhydrous diglyme (1.0 mL). The reaction mixture was stirred for 16 h at 25 °C. The crude material was purified by flash column chromatography (petroleum ether/EtOAc = 100:1) to provide the title compound as a colorless liquid in 45% yield (42.5 mg), and >99:1 rr was detected by GC.

$^1\text{H NMR}$  (500 MHz,  $\text{CDCl}_3$ )  $\delta$  7.41 – 7.36 (m, 2H), 7.34 – 7.29 (m, 2H), 7.24 – 7.20 (m, 1H), 3.69 (dd,  $J = 8.0, 6.3$  Hz, 1H), 3.58 (t,  $J = 6.6$  Hz, 2H), 1.78 – 1.67 (m, 2H),

1.54 – 1.42 (m, 4H), 1.38 – 1.28 (m, 2H), 1.12 – 0.98 (m, 21H), 0.89 (s, 9H), 0.04 (s, 6H);

$^{13}\text{C}$  NMR (126 MHz,  $\text{CDCl}_3$ )  $\delta$  142.4, 128.4, 127.5, 126.5, 110.1, 83.3, 63.3, 39.2, 38.9, 32.9, 27.2, 26.1, 25.6, 18.8, 18.5, 11.4, –5.1;

HRMS (ESI) calcd. for  $\text{C}_{29}\text{H}_{53}\text{OSi}_2$   $[\text{M}+\text{H}]^+$   $m/z$  473.3629, found 473.3633;

IR (neat,  $\text{cm}^{-1}$ ) 2937, 2862, 2168, 1098, 833, 663.

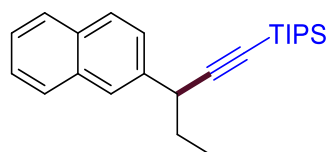

**Triisopropyl(3-(naphthalen-2-yl)pent-1-yn-1-yl)silane** (Figure 3, **3x**). From **2-(prop-1-en-1-yl)naphthalene** (**1x**) (33.6 mg, 0.20 mmol) and **(bromoethynyl)triisopropylsilane** (**2a**) (78.4 mg, 0.30 mmol), the title compound was prepared following the general procedure **A** using  $\text{NiI}_2 \cdot x\text{H}_2\text{O}$  (3.8 mg, 5.0 mol%), **L** (4.3 mg, 6.0 mol%),  $\text{Na}_2\text{CO}_3$  (42.4 mg, 2.0 equiv), NaI (3.0 mg, 10.0 mol%), PMHS (60  $\mu\text{L}$ , 1.0 mmol, 5.0 equiv) and anhydrous DME (2.0 mL). The reaction mixture was stirred for 16 h at 25  $^\circ\text{C}$ . The crude material was purified by flash column chromatography (petroleum ether) to provide the title compound as a colorless liquid in 95% yield (66.5 mg), and >99:1 rr was detected by GC.

$^1\text{H}$  NMR (400 MHz,  $\text{CDCl}_3$ )  $\delta$  7.92 – 7.87 (m, 1H), 7.85 – 7.78 (m, 3H), 7.52 – 7.41 (m, 3H), 3.83 (dd,  $J = 8.1, 5.5$  Hz, 1H), 1.98 – 1.80 (m, 2H), 1.16 – 1.11 (m, 21H), 1.06 (t,  $J = 7.3$  Hz, 3H);

$^{13}\text{C}$  NMR (101 MHz,  $\text{CDCl}_3$ )  $\delta$  139.5, 133.5, 132.5, 128.0, 127.8, 127.7, 126.3, 126.2, 126.1, 125.6, 109.9, 83.7, 40.6, 31.9, 18.8, 11.8, 11.5;

HRMS (ESI) calcd. for  $\text{C}_{24}\text{H}_{34}\text{SiNa}$   $[\text{M}+\text{Na}]^+$   $m/z$  373.2322, found 373.2318;

IR (neat,  $\text{cm}^{-1}$ ) 2940, 2863, 2167, 882, 676.

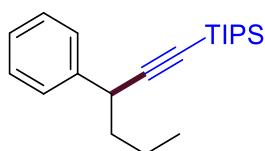

**Triisopropyl(3-phenylhex-1-yn-1-yl)silane** (Figure 3, **3y**). From **but-1-en-1-ylbenzene** (**1y**) (26.4 mg, 0.20 mmol) and **(bromoethynyl)triisopropylsilane** (**2a**) (78.4 mg, 0.30 mmol), the title compound was prepared following the general procedure **A** using  $\text{NiI}_2 \cdot x\text{H}_2\text{O}$  (3.8 mg, 5.0 mol%), **L** (4.3 mg, 6.0 mol%),  $\text{Na}_2\text{CO}_3$  (42.4 mg, 2.0 equiv), NaI (3.0 mg, 10.0 mol%) and PMHS (60  $\mu\text{L}$ , 1.0 mmol, 5.0 equiv), anhydrous DME (2.0 mL). The reaction mixture was stirred for 16 h at 25 °C. The crude material was purified by flash column chromatography (petroleum ether) to provide the title compound as a colorless liquid in 93% yield (58.7 mg), and >99:1 rr was detected by GC.

$^1\text{H NMR}$  (400 MHz,  $\text{CDCl}_3$ )  $\delta$  7.44 – 7.36 (m, 2H), 7.37 – 7.27 (m, 2H), 7.28 – 7.18 (m, 1H), 3.72 (t,  $J = 7.2$  Hz, 1H), 1.79 – 1.68 (m, 2H), 1.58 – 1.45 (m, 2H), 1.14 – 1.06 (m, 21H), 0.94 (t,  $J = 7.3$  Hz, 3H);

$^{13}\text{C NMR}$  (101 MHz,  $\text{CDCl}_3$ )  $\delta$  142.4, 128.4, 127.6, 126.5, 110.2, 83.1, 41.3, 38.8, 20.6, 18.8, 13.9, 11.5;

**HRMS** (ESI) calcd. for  $\text{C}_{21}\text{H}_{34}\text{SiNa}$   $[\text{M}+\text{Na}]^+$   $m/z$  337.2322, found 337.2320;

**IR** (neat,  $\text{cm}^{-1}$ ) 2940, 2864, 2167, 1462, 882, 675.

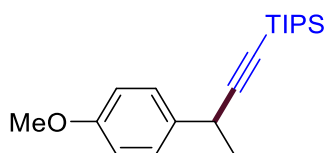

**Triisopropyl(3-(4-methoxyphenyl)pent-1-yn-1-yl)silane** (Figure 3, **3z**). From **(E)-1-methoxy-4-(prop-1-en-1-yl)benzene** (**1z**) (29.6 mg, 0.20 mmol) and **(bromoethynyl)triisopropylsilane** (**2a**) (78.4 mg, 0.30 mmol), the title compound was prepared following the general procedure **A** using  $\text{NiI}_2 \cdot x\text{H}_2\text{O}$  (3.8 mg, 5.0 mol%), **L** (4.3 mg, 6.0 mol%),  $\text{Na}_2\text{CO}_3$  (42.4 mg, 2.0 equiv), NaI (3.0 mg, 10.0 mol%), PMHS (60  $\mu\text{L}$ , 1.0 mmol, 5.0 equiv) and anhydrous DME (1.0 mL). The reaction mixture was stirred for 16 h at 25 °C. The crude material was purified by flash column

chromatography (petroleum ether) to provide the title compound as a colorless liquid in 86% yield (56.8 mg), and >99:1 rr was detected by GC.

**<sup>1</sup>H NMR** (400 MHz, CDCl<sub>3</sub>) δ 7.31 – 7.27 (m, 2H), 6.88 – 6.83 (m, 2H), 3.80 (s, 3H), 3.61 (dd, *J* = 8.1, 5.6 Hz, 1H), 1.82 – 1.66 (m, 2H), 1.14 – 1.05 (m, 21H), 1.01 (t, *J* = 7.3 Hz, 3H);

**<sup>13</sup>C NMR** (101 MHz, CDCl<sub>3</sub>) δ 158.3, 134.2, 128.6, 113.7, 110.3, 83.1, 55.4, 39.7, 32.2, 18.8, 11.7, 11.5;

**HRMS** (ESI) calcd. for C<sub>21</sub>H<sub>34</sub>OSiNa [M+Na]<sup>+</sup> *m/z* 353.2271, found 353.2268;

**IR** (neat, cm<sup>-1</sup>) 2940, 2864, 2166, 1510, 1245, 666.

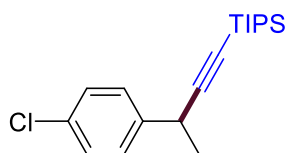

**(3-(4-Chlorophenyl)pent-1-yn-1-yl)triisopropylsilane** (Figure 3, **3a'**). From **1-chloro-4-(prop-1-en-1-yl)benzene (1a')** (30.5 mg, 0.20 mmol) and **(bromoethynyl)triisopropylsilane (2a)** (78.4 mg, 0.30 mmol), the title compound was prepared following the general procedure **A** using NiI<sub>2</sub>·xH<sub>2</sub>O (3.8 mg, 5.0 mol%), **L** (4.3 mg, 6.0 mol%), Na<sub>2</sub>CO<sub>3</sub> (42.4 mg, 2.0 equiv), NaI (3.0 mg, 10.0 mol%), PMHS (60 μL, 1.0 mmol, 5.0 equiv) and anhydrous DME (2.0 mL). The reaction mixture was stirred for 16 h at 25 °C. The crude material was purified by flash column chromatography (petroleum ether) to provide the title compound as a colorless liquid in 94% yield (62.8 mg), and >99:1 rr was detected by GC.

**<sup>1</sup>H NMR** (500 MHz, CDCl<sub>3</sub>) δ 7.37 – 7.27 (m, 4H), 3.63 (dd, *J* = 8.2, 5.6 Hz, 1H), 1.83 – 1.75 (m, 1H), 1.75 – 1.67 (m, 1H), 1.13 – 1.05 (m, 21H), 1.01 (t, *J* = 7.3 Hz, 3H);

**<sup>13</sup>C NMR** (126 MHz, CDCl<sub>3</sub>) δ 140.6, 132.3, 129.0, 128.5, 109.3, 83.8, 39.9, 32.0, 18.8, 11.6, 11.4;

**HRMS** (ESI) calcd. for C<sub>20</sub>H<sub>31</sub>ClSiNa [M+Na]<sup>+</sup> *m/z* 357.1776, found 357.1779;

**IR** (neat, cm<sup>-1</sup>) 2941, 2864, 2169, 1407, 881, 661.



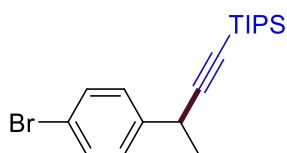

**(3-(4-Bromophenyl)pent-1-yn-1-yl)triisopropylsilane** (Figure 3, **3b'**). From **1-bromo-4-(prop-1-en-1-yl)benzene** (**1b'**) (39.4 mg, 0.20 mmol) and **(bromoethynyl)triisopropylsilane** (**2a**) (78.4 mg, 0.30 mmol), the title compound was prepared following the general procedure **A** using  $\text{NiI}_2 \cdot x\text{H}_2\text{O}$  (3.8 mg, 5.0 mol%), **L** (4.3 mg, 6.0 mol%),  $\text{Na}_2\text{CO}_3$  (42.4 mg, 2.0 equiv), NaI (3.0 mg, 10.0 mol%), PMHS (60  $\mu\text{L}$ , 1.0 mmol, 5.0 equiv) and anhydrous DME (2.0 mL). The reaction mixture was stirred for 16 h at 25 °C. The crude material was purified by flash column chromatography (petroleum ether) to provide the title compound as a colorless liquid in 96% yield (72.7 mg), and >99:1 rr was detected by GC.

$^1\text{H NMR}$  (500 MHz,  $\text{CDCl}_3$ )  $\delta$  7.47 – 7.41 (m, 2H), 7.28 – 7.23 (m, 2H), 3.62 (dd,  $J$  = 8.1, 5.5 Hz, 1H), 1.83 – 1.75 (m, 1H), 1.75 – 1.65 (m, 1H), 1.10 – 1.08 (m, 21H), 1.01 (t,  $J$  = 7.4 Hz, 3H);

$^{13}\text{C NMR}$  (126 MHz,  $\text{CDCl}_3$ )  $\delta$  141.1, 131.4, 129.4, 120.4, 109.2, 83.9, 40.0, 32.0, 18.8, 11.6, 11.4;

**HRMS** (ESI) calcd. for  $\text{C}_{20}\text{H}_{31}\text{BrSiNa}$   $[\text{M}+\text{Na}]^+$   $m/z$  401.1271, found 401.1270;

**IR** (neat,  $\text{cm}^{-1}$ ) 2940, 2864, 2169, 1461, 1101, 881.

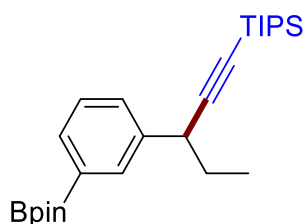

**Triisopropyl(3-(3-(4,4,5,5-tetramethyl-1,3,2-dioxaborolan-2-yl)phenyl)pent-1-yn-1-yl)silane** (Figure 3, **3c'**). From **4,4,5,5-tetramethyl-2-(3-(prop-1-en-1-yl)phenyl)-1,3,2-dioxaborolane** (**1c'**) (48.8 mg, 0.20 mmol) and **(bromoethynyl)triisopropylsilane** (**2a**) (78.4 mg, 0.30 mmol), the title compound was prepared following the general procedure **A** using  $\text{NiI}_2 \cdot x\text{H}_2\text{O}$  (3.8 mg, 5.0 mol%), **L**

(4.3 mg, 6.0 mol%), Na<sub>2</sub>CO<sub>3</sub> (42.4 mg, 2.0 equiv), NaI (3.0 mg, 10.0 mol%), PMHS (60 μL, 1.0 mmol, 5.0 equiv) and anhydrous DME (1.0 mL). The reaction mixture was stirred for 16 h at 25 °C. The crude material was purified by flash column chromatography (petroleum ether/EtOAc = 50:1) to provide the title compound as a colorless liquid in 69% yield (59.1 mg), and >99:1 rr was detected by GC.

<sup>1</sup>H NMR (500 MHz, CDCl<sub>3</sub>) δ 7.85 – 7.81 (m, 1H), 7.66 (d, *J* = 7.3 Hz, 1H), 7.53 – 7.47 (m, 1H), 7.32 (t, *J* = 7.5 Hz, 1H), 3.66 (dd, *J* = 8.5, 5.3 Hz, 1H), 1.87 – 1.77 (m, 1H), 1.76 – 1.68 (m, 1H), 1.34 (s, 12H), 1.13 – 1.07 (m, 21H), 1.02 (t, *J* = 7.3 Hz, 3H);  
<sup>13</sup>C NMR (126 MHz, CDCl<sub>3</sub>) δ 141.4, 134.1, 133.0, 130.5, 127.8, 110.0, 83.8, 83.4, 40.5, 32.1, 25.0, 24.9, 18.8, 11.9, 11.5;

HRMS (ESI) calcd. for C<sub>26</sub>H<sub>43</sub>BO<sub>2</sub>SiNa [M+Na]<sup>+</sup> *m/z* 449.3018, found 449.3019;

IR (neat, cm<sup>-1</sup>) 2940, 2864, 2168, 1357, 1143, 673.

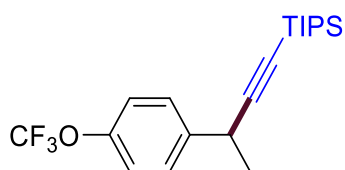

**Triisopropyl(3-(4-(trifluoromethoxy)phenyl)pent-1-yn-1-yl)silane** (Figure 3, **3d'**). From **1-(prop-1-en-1-yl)-4-(trifluoromethoxy)benzene** (**1d'**) (40.4 mg, 0.20 mmol) and **(bromoethynyl)triisopropylsilane** (**2a**) (78.4 mg, 0.30 mmol), the title compound was prepared following the general procedure **A** using NiI<sub>2</sub>·xH<sub>2</sub>O (3.8 mg, 5.0 mol%), **L** (4.3 mg, 6.0 mol%), Na<sub>2</sub>CO<sub>3</sub> (42.4 mg, 2.0 equiv), NaI (3.0 mg, 10.0 mol%), PMHS (60 μL, 1.0 mmol, 5.0 equiv) and anhydrous DME (2.0 mL). The reaction mixture was stirred for 16 h at 25 °C. The crude material was purified by flash column chromatography (petroleum ether) to provide the title compound as a colorless liquid in 93% yield (71.8 mg), and >99:1 rr was detected by GC.

<sup>1</sup>H NMR (500 MHz, CDCl<sub>3</sub>) δ 7.43 – 7.38 (m, 2H), 7.16 (d, *J* = 8.2 Hz, 2H), 3.68 (dd, *J* = 8.3, 5.4 Hz, 1H), 1.86 – 1.66 (m, 2H), 1.12 – 1.07 (m, 21H), 1.02 (t, *J* = 7.3 Hz, 3H);

<sup>13</sup>C NMR (126 MHz, CDCl<sub>3</sub>) δ 147.9, 140.8, 128.9, 120.9, 120.7 (q, *J* = 257.2 Hz),

109.2, 84.1, 39.9, 32.1, 18.8, 11.7, 11.4;

$^{19}\text{F}$  NMR (471 MHz,  $\text{CDCl}_3$ )  $\delta$  -57.9;

HRMS (ESI) calcd. for  $\text{C}_{21}\text{H}_{31}\text{F}_3\text{OSiNa}$   $[\text{M}+\text{Na}]^+$   $m/z$  407.1988, found 407.1987;

IR (neat,  $\text{cm}^{-1}$ ) 2942, 2865, 2170, 1256, 1162, 673.

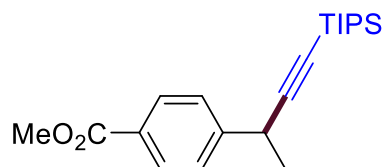

**Methyl 4-(1-(triisopropylsilyl)pent-1-yn-3-yl)benzoate** (Figure 3, **3e'**). From **methyl 4-(prop-1-en-1-yl)benzoate** (**1e'**) (35.2 mg, 0.20 mmol) and **(bromoethynyl)triisopropylsilane** (**2a**) (78.4 mg, 0.30 mmol), the title compound was prepared following the general procedure **A** using  $\text{NiI}_2 \cdot x\text{H}_2\text{O}$  (3.8 mg, 5.0 mol%), **L** (4.3 mg, 6.0 mol%),  $\text{Na}_2\text{CO}_3$  (42.4 mg, 2.0 equiv), NaI (3.0 mg, 10.0 mol%), PMHS (60  $\mu\text{L}$ , 1.0 mmol, 5.0 equiv) and anhydrous DME (1.0 mL). The reaction mixture was stirred for 16 h at 25  $^\circ\text{C}$ . The crude material was purified by flash column chromatography (petroleum ether/EtOAc = 50:1) to provide the title compound as a colorless liquid in 76% yield (54.4 mg), and >99:1 rr was detected by GC.

$^1\text{H}$  NMR (400 MHz,  $\text{CDCl}_3$ )  $\delta$  8.02 – 7.95 (m, 2H), 7.48 – 7.41 (m, 2H), 3.91 (s, 3H), 3.70 (dd,  $J$  = 8.1, 5.5 Hz, 1H), 1.86 – 1.69 (m, 2H), 1.15 – 1.04 (m, 21H), 1.01 (t,  $J$  = 7.4 Hz, 3H);

$^{13}\text{C}$  NMR (101 MHz,  $\text{CDCl}_3$ )  $\delta$  167.1, 147.4, 129.8, 128.6, 127.7, 109.0, 84.2, 52.1, 40.5, 31.9, 18.8, 11.7, 11.4;

HRMS (ESI) calcd. for  $\text{C}_{22}\text{H}_{34}\text{O}_2\text{SiNa}$   $[\text{M}+\text{Na}]^+$   $m/z$  381.2220, found 381.2221;

IR (neat,  $\text{cm}^{-1}$ ) 2941, 2864, 2169, 1725, 1276, 676.

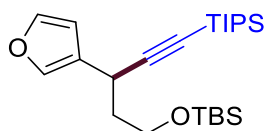

***tert*-Butyl((3-(furan-3-yl)-5-(triisopropylsilyl)pent-4-yn-1-yl)oxy)dimethylsilane**

(Figure 3, **3f'**). From *tert*-butyl((3-(furan-3-yl)allyl)oxy)dimethylsilane (**1f'**) (47.7 mg, 0.20 mmol) and (bromoethynyl)triisopropylsilane (**2a**) (78.4 mg, 0.30 mmol), the title compound was prepared following the general procedure **A** using  $\text{NiI}_2 \cdot x\text{H}_2\text{O}$  (3.8 mg, 5.0 mol%), **L** (4.3 mg, 6.0 mol%),  $\text{Na}_2\text{CO}_3$  (42.4 mg, 2.0 equiv), NaI (3.0 mg, 10.0 mol%), PMHS (60  $\mu\text{L}$ , 1.0 mmol, 5.0 equiv) and anhydrous DME (1.0 mL). The reaction mixture was stirred for 16 h at 25 °C. The crude material was purified by flash column chromatography (petroleum ether/EtOAc = 200:1) to provide the title compound as a colorless liquid in 85% yield (71.9 mg), and >99:1 rr was detected by GC.

$^1\text{H NMR}$  (500 MHz,  $\text{CDCl}_3$ )  $\delta$  7.39 – 7.37 (m, 1H), 7.37 – 7.35 (m, 1H), 6.40 – 6.34 (m, 1H), 3.90 – 3.83 (m, 1H), 3.81 – 3.71 (m, 2H), 2.01 – 1.91 (m, 1H), 1.89 – 1.80 (m, 1H), 1.11 – 1.02 (m, 21H), 0.91 (s, 9H), 0.07 (s, 3H), 0.07 (s, 3H);

$^{13}\text{C NMR}$  (126 MHz,  $\text{CDCl}_3$ )  $\delta$  143.1, 139.5, 126.2, 110.0, 109.1, 82.0, 60.6, 39.9, 26.1, 25.9, 18.8, 18.4, 11.4, -5.1, -5.2;

**HRMS** (ESI) calcd. for  $\text{C}_{24}\text{H}_{44}\text{O}_2\text{Si}_2\text{Na}$   $[\text{M}+\text{Na}]^+$   $m/z$  443.2772, found 443.2767;

**IR** (neat,  $\text{cm}^{-1}$ ) 2942, 2864, 2168, 1103, 833, 775.

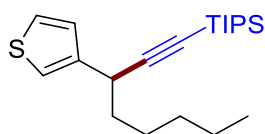

**Triisopropyl(3-(thiophen-3-yl)oct-1-yn-1-yl)silane** (Figure 3, **3g'**). From 3-(hex-1-en-1-yl)thiophene (**1g'**) (33.3 mg, 0.20 mmol) and (bromoethynyl)triisopropylsilane (**2a**) (78.4 mg, 0.30 mmol), the title compound was prepared following the general procedure **A** using  $\text{NiI}_2 \cdot x\text{H}_2\text{O}$  (3.8 mg, 5.0 mol%), **L** (4.3 mg, 6.0 mol%),  $\text{Na}_2\text{CO}_3$  (42.4 mg, 2.0 equiv), NaI (3.0 mg, 10.0 mol%), PMHS (60  $\mu\text{L}$ , 1.0 mmol, 5.0 equiv) and anhydrous DME (1.0 mL). The reaction mixture was stirred for 16 h at 25 °C. The crude

material was purified by flash column chromatography (petroleum ether) to provide the title compound as a colorless liquid in 91% yield (63.2 mg).

**<sup>1</sup>H NMR** (500 MHz, CDCl<sub>3</sub>) δ 7.29 – 7.23 (m, 1H), 7.21 – 7.16 (m, 1H), 7.05 (dd, *J* = 4.9, 1.3 Hz, 1H), 3.79 (dd, *J* = 8.6, 5.3 Hz, 1H), 1.85 – 1.66 (m, 2H), 1.57 – 1.45 (m, 2H), 1.36 – 1.25 (m, 4H), 1.14 – 1.05 (m, 21H), 0.89 (t, *J* = 7.0 Hz, 3H);

**<sup>13</sup>C NMR** (126 MHz, CDCl<sub>3</sub>) δ 142.9, 127.1, 125.5, 120.7, 110.0, 82.6, 37.7, 34.3, 31.5, 26.8, 22.7, 18.8, 14.1, 11.4;

**HRMS** (ESI) calcd. for C<sub>21</sub>H<sub>36</sub>SSiNa [M+Na]<sup>+</sup> *m/z* 371.2199, found 371.2200;

**IR** (neat, cm<sup>-1</sup>) 2936, 2863, 2168, 1461, 882, 664;

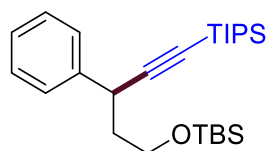

***tert*-Butyldimethyl((3-phenyl-5-(triisopropylsilyl)pent-4-yn-1-yl)oxy)silane**

(Figure 3, **3h'**). From *tert*-butyl(cinnamyloxy)dimethylsilane (**1h'**) (49.7 mg, 0.20 mmol) and (bromoethynyl)triisopropylsilane (**2a**) (78.4 mg, 0.30 mmol), the title compound was prepared following the general procedure **A** using NiI<sub>2</sub>·xH<sub>2</sub>O (3.8 mg, 5.0 mol%), **L** (4.3 mg, 6.0 mol%), Na<sub>2</sub>CO<sub>3</sub> (42.4 mg, 2.0 equiv), NaI (3.0 mg, 10.0 mol%), PMHS (60 μL, 1.0 mmol, 5.0 equiv) and anhydrous DME (1.0 mL). The reaction mixture was stirred for 16 h at 25 °C. The crude material was purified by flash column chromatography (petroleum ether) to provide the title compound as a colorless liquid in 65% yield (55.8 mg), and >99:1 rr was detected by GC.

**<sup>1</sup>H NMR** (400 MHz, CDCl<sub>3</sub>) δ 7.44 – 7.37 (m, 2H), 7.31 (t, *J* = 7.6 Hz, 2H), 7.27 – 7.17 (m, 1H), 3.90 (dd, *J* = 9.4, 5.7 Hz, 1H), 3.87 – 3.81 (m, 1H), 3.74 – 3.67 (m, 1H), 2.04 – 1.83 (m, 2H), 1.17 – 1.05 (m, 21H), 0.91 (s, 9H), 0.07 (s, 3H), 0.06 (s, 3H);

**<sup>13</sup>C NMR** (101 MHz, CDCl<sub>3</sub>) δ 142.1, 128.4, 127.6, 126.6, 109.7, 83.4, 60.8, 42.2, 35.2, 26.1, 18.8, 18.4, 11.4, -5.1, -5.1;

**HRMS** (ESI) calcd. for C<sub>26</sub>H<sub>46</sub>OSi<sub>2</sub>Na [M+Na]<sup>+</sup> *m/z* 453.2979, found 453.2977;

**IR** (neat, cm<sup>-1</sup>) 2941, 2863, 2167, 1104, 832, 698.

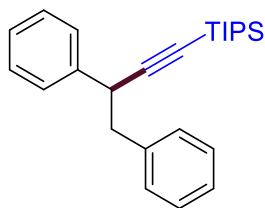

**(3,4-Biphenylbut-1-yn-1-yl)triisopropylsilane** (Figure 3, **3i'**). From **(E)-1,2-diphenylethene** (**1i'**) (36.1 mg, 0.20 mmol) and **(bromoethynyl)triisopropylsilane** (**2a**) (78.4 mg, 0.30 mmol), the title compound was prepared following the general procedure **A** using  $\text{NiI}_2 \cdot x\text{H}_2\text{O}$  (3.8 mg, 5.0 mol%), **L** (4.3 mg, 6.0 mol%),  $\text{Na}_2\text{CO}_3$  (42.4 mg, 2.0 equiv), NaI (3.0 mg, 10.0 mol%), PMHS (60  $\mu\text{L}$ , 1.0 mmol, 5.0 equiv) and anhydrous DME (2.0 mL). The reaction mixture was stirred for 16 h at 25 °C. The crude material was purified by flash column chromatography (petroleum ether/EtOAc = 100:1) to provide the title compound as a colorless liquid in 91% yield (65.9 mg), and >99:1 rr was detected by GC.

**$^1\text{H}$  NMR** (400 MHz,  $\text{CDCl}_3$ )  $\delta$  7.45 – 7.34 (m, 4H), 7.33 – 7.26 (m, 4H), 7.24 – 7.20 (m, 2H), 4.04 (dd,  $J = 8.3, 6.2$  Hz, 1H), 3.18 – 3.00 (m, 2H), 1.20 – 0.76 (m, 21H);

**$^{13}\text{C}$  NMR** (101 MHz,  $\text{CDCl}_3$ )  $\delta$  141.5, 138.9, 129.6, 128.4, 128.1, 127.8, 126.8, 126.4, 109.2, 84.5, 45.5, 41.3, 18.7, 11.4;

**HRMS** (ESI) calcd. for  $\text{C}_{25}\text{H}_{34}\text{SiNa}$  [ $\text{M}+\text{Na}$ ] $^+$   $m/z$  385.2322, found 385.2321;

**IR** (neat,  $\text{cm}^{-1}$ ) 2941, 2864, 2169, 1453, 882, 697.

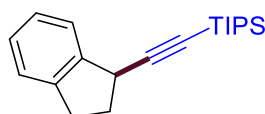

**((2,3-Dihydro-1H-inden-1-yl)ethynyl)triisopropylsilane** (Figure 3, **3j'**). From **1H-indene** (**1j'**) (23.2 mg, 0.20 mmol) and **(bromoethynyl)triisopropylsilane** (**2a**) (78.4 mg, 0.30 mmol), the title compound was prepared following the general procedure **A** using  $\text{NiI}_2 \cdot x\text{H}_2\text{O}$  (3.8 mg, 5.0 mol%), **L** (4.3 mg, 6.0 mol%),  $\text{Na}_2\text{CO}_3$  (42.4 mg, 2.0 equiv), NaI (3.0 mg, 10.0 mol%), PMHS (60  $\mu\text{L}$ , 1.0 mmol, 5.0 equiv) and anhydrous DME (1.0 mL). The reaction mixture was stirred for 16 h at 25 °C. The crude material was purified by flash column chromatography (petroleum ether) to provide the title

compound as a colorless liquid in 94% yield (56.3 mg), and >99:1 rr was detected by GC.

**<sup>1</sup>H NMR** (500 MHz, CDCl<sub>3</sub>) δ 7.45 – 7.39 (m, 1H), 7.26 – 7.16 (m, 3H), 4.08 – 3.99 (m, 1H), 3.03 – 2.93 (m, 1H), 2.92 – 2.81 (m, 1H), 2.65 – 2.44 (m, 1H), 2.20 – 2.03 (m, 1H), 1.15 – 1.03 (m, 21H);

**<sup>13</sup>C NMR** (126 MHz, CDCl<sub>3</sub>) δ 143.9, 143.0, 127.0, 126.6, 124.4, 124.3, 110.3, 81.1, 37.4, 34.8, 31.6, 18.8, 11.4;

**HRMS** (ESI) calcd. for C<sub>20</sub>H<sub>30</sub>SiNa [M+Na]<sup>+</sup> *m/z* 321.2009, found 321.2009;

**IR** (neat, cm<sup>-1</sup>) 2941, 2864, 2172, 1460, 881, 671.

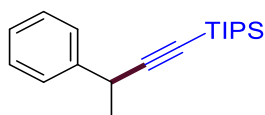

**Triisopropyl(3-phenylbut-1-yn-1-yl)silane** (Figure 3, **3k'**). From **styrene (1k')** (20.8 mg, 0.20 mmol) and **(bromoethynyl)triisopropylsilane (2a)** (78.4 mg, 0.30 mmol), the title compound was prepared following the general procedure **A** using NiI<sub>2</sub>·xH<sub>2</sub>O (3.8 mg, 5.0 mol%), **L** (4.3 mg, 6.0 mol%), Na<sub>2</sub>CO<sub>3</sub> (42.4 mg, 2.0 equiv), NaI (3.0 mg, 10.0 mol%), PMHS (60 μL, 1.0 mmol, 5.0 equiv) and anhydrous DME (1.0 mL). The reaction mixture was stirred for 16 h at 25 °C. The crude material was purified by flash column chromatography (petroleum ether) to provide the title compound as a colorless liquid in 57% yield (32.4 mg), and >99:1 rr was detected by GC.

**<sup>1</sup>H NMR** (500 MHz, CDCl<sub>3</sub>) δ 7.47 (d, *J* = 7.9 Hz, 2H), 7.37 (t, *J* = 7.7 Hz, 2H), 7.30 – 7.25 (m, 1H), 3.87 (q, *J* = 7.1 Hz, 1H), 1.56 (d, *J* = 7.2 Hz, 3H), 1.21 – 1.04 (m, 21H).

**<sup>13</sup>C NMR** (126 MHz, CDCl<sub>3</sub>) δ 143.4, 128.5, 127.0, 126.6, 111.3, 82.4, 33.1, 25.2, 18.8, 11.4.

**HRMS** (ESI) calcd. for C<sub>19</sub>H<sub>30</sub>SiNa [M+Na]<sup>+</sup> *m/z* 309.2009, found 309.2011;

**IR** (neat, cm<sup>-1</sup>) 2941, 2864, 2164, 1462, 1097, 663.

## Enantioselective NiH-Catalyzed Reductive Hydroalkynylation.

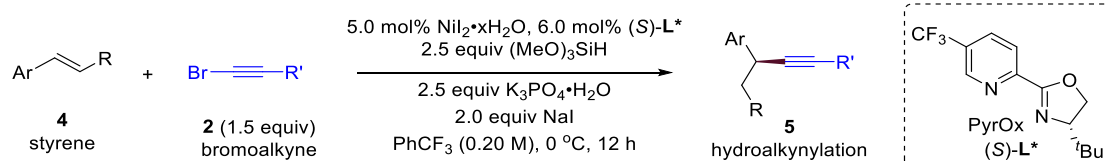

**General procedure (B) for enantioselective NiH-catalyzed reductive hydroalkynylation.** In a nitrogen-filled glove box, to an oven-dried 8 mL screw-cap vial equipped with a magnetic stir bar were added NiI<sub>2</sub>·xH<sub>2</sub>O (3.8 mg, 5.0 mol%), (S)-L\* (3.3 mg, 6.0 mol%), K<sub>3</sub>PO<sub>4</sub>·H<sub>2</sub>O (115.1 mg, 2.5 equiv), NaI (60.0 mg, 2.0 equiv) and anhydrous PhCF<sub>3</sub> (1.0 mL). The mixture was stirred for 20 min at room temperature (stirred at 800 rpm) before the addition of (MeO)<sub>3</sub>SiH (64 μL, 0.50 mmol, 2.5 equiv). Stirring was continued for an additional 5 min at room temperature before the addition of olefin **4** (0.20 mmol, 1.0 equiv) and bromoalkyne **2** (0.30 mmol, 1.5 equiv). The tube was sealed with a teflon-lined screw cap, removed from the glove box and the reaction was stirred at 0 °C for up to 12 h (the mixture was stirred at 800 rpm). After the reaction was complete, the reaction was quenched upon the addition of H<sub>2</sub>O, and the mixture was extracted with EtOAc. The organic layer was concentrated to give the crude product. Dodecane (20 μL) was added as an internal standard for GC analysis. The product was purified by flash column chromatography (petroleum ether/EtOAc) for each substrate. The yields reported are the average of at least two experiments, unless otherwise indicated. The enantiomeric excesses (% ee) of the corresponding products were determined by HPLC analysis using chiral stationary phases.



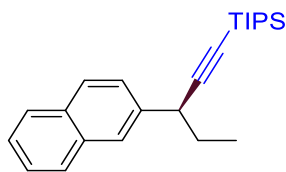

**(S)-Triisopropyl(3-(naphthalen-2-yl)pent-1-yn-1-yl)silane** (Figure 4, **5a**). From **2-(prop-1-en-1-yl)naphthalene** (**4a**) (33.6 mg, 0.20 mmol) and **(bromoethynyl)triisopropylsilane** (**2a**) (78.4 mg, 0.30 mmol), the title compound was prepared following the general procedure **B** using  $\text{NiI}_2 \cdot x\text{H}_2\text{O}$  (3.8 mg, 5.0 mol%), (*S*)-**L\*** (3.3 mg, 6.0 mol%),  $\text{K}_3\text{PO}_4 \cdot \text{H}_2\text{O}$  (115.1 mg, 2.5 equiv), NaI (60.0 mg, 2.0 equiv),  $(\text{MeO})_3\text{SiH}$  (64  $\mu\text{L}$ , 0.5 mmol, 2.5 equiv) and anhydrous  $\text{PhCF}_3$  (1.0 mL). The reaction mixture was stirred for 12 h at 0 °C. The crude material was purified by flash column chromatography (petroleum ether) to provide the title compound as a colorless liquid in 71% yield (49.7 mg).

$^1\text{H NMR}$  (500 MHz,  $\text{CDCl}_3$ )  $\delta$  7.94 (s, 1H), 7.89 – 7.80 (m, 3H), 7.61 – 7.44 (m, 3H), 3.88 (dd,  $J = 8.0, 5.6$  Hz, 1H), 2.01 – 1.93 (m, 1H), 1.92 – 1.85 (m, 1H), 1.23 – 1.16 (m, 21H), 1.11 (t,  $J = 7.3$  Hz, 3H);

$^{13}\text{C NMR}$  (126 MHz,  $\text{CDCl}_3$ )  $\delta$  139.5, 133.5, 132.5, 128.0, 127.8, 127.7, 126.2, 126.1, 126.0, 125.6, 109.9, 83.7, 40.6, 31.9, 18.8, 11.8, 11.5;

**HRMS** (ESI) calcd. for  $\text{C}_{24}\text{H}_{35}\text{Si}$   $[\text{M}+\text{H}]^+$   $m/z$  351.2503, found 351.2504;

**IR** (neat,  $\text{cm}^{-1}$ ) 2940, 2863, 2167, 1461, 882, 669;

$[\alpha]_{\text{D}}^{18} = -23.9$  ( $c = 1.76$ ,  $\text{CHCl}_3$ ); 94% *ee*;

**HPLC analysis** CHIRALCEL OD-H column, *n*-hexane/*iso*-propanol = 100/0, flow rate 0.8 mL/min, 220 nm UV detector,  $t_{\text{R}}$  (minor) = 7.5 min,  $t_{\text{R}}$  (major) = 8.6 min.

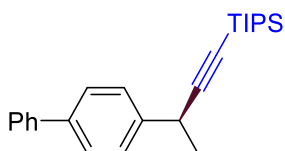

**(S)-3-([1,1'-Biphenyl]-4-yl)pent-1-yn-1-yltriisopropylsilane** (Figure 4, **5b**). From **4-(prop-1-en-1-yl)-1,1'-biphenyl** (**4b**) (38.9 mg, 0.20 mmol) and **(bromoethynyl)triisopropylsilane** (**2a**) (78.4 mg, 0.30 mmol), the title compound was

prepared following the general procedure **B** using  $\text{NiI}_2 \cdot x\text{H}_2\text{O}$  (3.8 mg, 5.0 mol%), (*S*)-**L\*** (3.3 mg, 6.0 mol%),  $\text{K}_3\text{PO}_4 \cdot \text{H}_2\text{O}$  (115.1 mg, 2.5 equiv), NaI (60.0 mg, 2.0 equiv),  $(\text{MeO})_3\text{SiH}$  (64  $\mu\text{L}$ , 0.5 mmol, 2.5 equiv) and anhydrous  $\text{PhCF}_3$  (1.0 mL). The reaction mixture was stirred for 12 h at 0 °C. The crude material was purified by flash column chromatography (petroleum ether) to provide the title compound as a colorless liquid in 66% yield (49.5 mg).

$^1\text{H NMR}$  (500 MHz,  $\text{CDCl}_3$ )  $\delta$  7.67 – 7.62 (m, 2H), 7.62 – 7.58 (m, 2H), 7.53 – 7.44 (m, 4H), 7.41 – 7.30 (m, 1H), 3.76 (dd,  $J = 8.3, 5.4$  Hz, 1H), 1.97 – 1.75 (m, 2H), 1.20 – 1.14 (m, 21H), 1.11 (t,  $J = 7.4$  Hz, 3H);

$^{13}\text{C NMR}$  (126 MHz,  $\text{CDCl}_3$ )  $\delta$  141.2, 141.0, 139.5, 128.8, 128.0, 127.3, 127.2, 127.1, 109.8, 83.5, 40.2, 32.2, 18.8, 11.8, 11.5;

**HRMS** (APCI) calcd. for  $\text{C}_{26}\text{H}_{36}\text{SiNa}$   $[\text{M}+\text{Na}]^+$   $m/z$  399.2478, found 399.2474;

**IR** (neat,  $\text{cm}^{-1}$ ) 2958, 2863, 2167, 1486, 761, 695;

$[\alpha]_{\text{D}}^{18} = -11.9$  ( $c = 1.46$ ,  $\text{CHCl}_3$ ); 94% *ee*;

**HPLC analysis** CHIRALCEL OD-H column, *n*-hexane/*iso*-propanol = 100/0, flow rate 0.8 mL/min, 220 nm UV detector,  $t_{\text{R}}$  (minor) = 10.4 min,  $t_{\text{R}}$  (major) = 12.4 min.

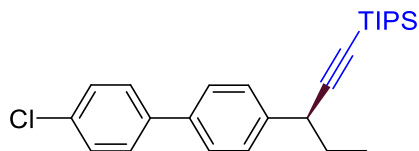

(*S*)-3-((1,1'-Biphenyl)-4-yl)pent-1-yn-1-yltriisopropylsilane (Figure 4, **5c**). From 4-chloro-4'-(prop-1-en-1-yl)-1,1'-biphenyl (**4c**) (45.7 mg, 0.20 mmol) and (bromoethynyl)triisopropylsilane (**2a**) (78.4 mg, 0.30 mmol), the title compound was prepared following the general procedure **B** using  $\text{NiI}_2 \cdot x\text{H}_2\text{O}$  (3.8 mg, 5.0 mol%), (*S*)-**L\*** (3.3 mg, 6.0 mol%),  $\text{K}_3\text{PO}_4 \cdot \text{H}_2\text{O}$  (115.1 mg, 2.5 equiv), NaI (60.0 mg, 2.0 equiv),  $(\text{MeO})_3\text{SiH}$  (64  $\mu\text{L}$ , 0.5 mmol, 2.5 equiv) and anhydrous  $\text{PhCF}_3$  (1.0 mL). The reaction mixture was stirred for 12 h at 0 °C. The crude material was purified by flash column chromatography (petroleum ether) to provide the title compound as a colorless liquid in 51% yield (42.1 mg).

**<sup>1</sup>H NMR** (500 MHz, CDCl<sub>3</sub>) δ 7.56 – 7.52 (m, 4H), 7.51 – 7.46 (m, 2H), 7.44 – 7.39 (m, 2H), 3.74 (dd, *J* = 8.3, 5.4 Hz, 1H), 1.92 – 1.76 (m, 2H), 1.19 – 1.12 (m, 21H), 1.09 (t, *J* = 7.3 Hz, 3H);

**<sup>13</sup>C NMR** (126 MHz, CDCl<sub>3</sub>) δ 141.6, 139.5, 138.2, 133.3, 128.9, 128.3, 128.2, 126.9, 109.7, 83.6, 40.2, 32.1, 18.8, 11.8, 11.5;

**HRMS** (ESI) calcd. for C<sub>26</sub>H<sub>35</sub>ClSiNa [M+Na]<sup>+</sup> *m/z* 433.2089, found 433.2092

**IR** (neat, cm<sup>-1</sup>) 2940, 2864, 2167, 1484, 814, 671;

**[α]<sub>D</sub><sup>18</sup>** = -3.3 (*c* = 1.38, CHCl<sub>3</sub>); 96% *ee*;

**HPLC analysis** CHIRALCEL two connected OD-H columns, *n*-hexane/*iso*-propanol = 100/0, flow rate 0.8 mL/min, 220 nm UV detector, *t<sub>R</sub>* (minor) = 13.5 min, *t<sub>R</sub>* (major) = 14.2 min.

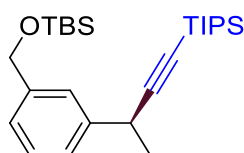

**(*S*)-tert-Butyldimethyl((3-(1-(triisopropylsilyl)pent-1-yn-3-yl)benzyl)oxy)silane**

(Figure 4, **5d**). From *tert*-butyldimethyl((3-(prop-1-en-1-yl)benzyl)oxy)silane (**4d**) (52.5 mg, 0.20 mmol) and (bromoethynyl)triisopropylsilane (**2a**) (78.4 mg, 0.30 mmol), the title compound was prepared following the general procedure **B** using NiI<sub>2</sub>·xH<sub>2</sub>O (3.8 mg, 5.0 mol%), (*S*)-**L\*** (3.3 mg, 6.0 mol%), K<sub>3</sub>PO<sub>4</sub>·H<sub>2</sub>O (115.1 mg, 2.5 equiv), NaI (60.0 mg, 2.0 equiv), (MeO)<sub>3</sub>SiH (64 μL, 0.5 mmol, 2.5 equiv) and anhydrous PhCF<sub>3</sub> (1.0 mL). The reaction mixture was stirred for 12 h at 0 °C. The crude material was purified by flash column chromatography (petroleum ether/EtOAc = 100:1) to provide the title compound as a colorless liquid in 91% yield (81.1 mg).

**<sup>1</sup>H NMR** (500 MHz, CDCl<sub>3</sub>) δ 7.38 – 7.33 (m, 1H), 7.33 – 7.28 (m, 2H), 7.26 – 7.22 (m, 1H), 4.78 – 4.72 (m, 2H), 3.68 (dd, *J* = 8.2, 5.5 Hz, 1H), 1.89 – 1.72 (m, 2H), 1.17 – 1.09 (m, 21H), 1.05 (t, *J* = 7.3 Hz, 3H), 0.98 (s, 9H), 0.13 (s, 3H), 0.13 (s, 3H);

**<sup>13</sup>C NMR** (126 MHz, CDCl<sub>3</sub>) δ 142.0, 141.5, 128.3, 126.3, 125.5, 124.5, 110.1, 83.2, 65.2, 40.5, 32.1, 26.1, 18.8, 18.5, 11.8, 11.5, -5.0;

**HRMS** (ESI) calcd. for  $C_{27}H_{48}OSi_2Na$   $[M+Na]^+$   $m/z$  467.3136, found 467.3135;

**IR** (neat,  $cm^{-1}$ ) 2929, 2863, 2169, 1077, 835, 670;

$[\alpha]_D^{18} = -15.2$  ( $c = 1.33$ ,  $CHCl_3$ ); 90% *ee*;

**HPLC analysis** CHIRALCEL two connected OD-H columns, *n*-hexane/*iso*-propanol = 100/0, flow rate 0.5 mL/min, 220 nm UV detector,  $t_R$  (major) = 14.3 min,  $t_R$  (minor) = 14.8 min.

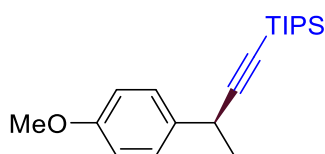

**(S)-Triisopropyl(3-(4-methoxyphenyl)pent-1-yn-1-yl)silane** (Figure 4, **5e**). From **(E)-1-methoxy-4-(prop-1-en-1-yl)benzene** (**4e**) (29.6 mg, 0.20 mmol) and **(bromoethynyl)triisopropylsilane** (**2a**) (78.4 mg, 0.30 mmol), the title compound was prepared following the general procedure **B** using  $NiI_2 \cdot xH_2O$  (3.8 mg, 5.0 mol%), **(S)-L\*** (3.3 mg, 6.0 mol%),  $K_3PO_4 \cdot H_2O$  (115.1 mg, 2.5 equiv), NaI (60.0 mg, 2.0 equiv),  $(MeO)_3SiH$  (64  $\mu$ L, 0.5 mmol, 2.5 equiv) and anhydrous  $PhCF_3$  (1.0 mL). The reaction mixture was stirred for 12 h at 0 °C. The crude material was purified by flash column chromatography (petroleum ether) to provide the title compound as a colorless liquid in 82% yield (54.1 mg).

**$^1H$  NMR** (500 MHz,  $CDCl_3$ )  $\delta$  7.34 – 7.29 (m, 2H), 6.91 – 6.80 (m, 2H), 3.81 (s, 3H), 3.63 (dd,  $J = 8.2, 5.5$  Hz, 1H), 1.84 – 1.75 (m, 1H), 1.78 – 1.67 (m, 1H), 1.15 – 1.07 (m, 21H), 1.03 (t,  $J = 7.3$  Hz, 3H);

**$^{13}C$  NMR** (126 MHz,  $CDCl_3$ )  $\delta$  158.3, 134.2, 128.5, 113.7, 110.3, 83.1, 55.3, 39.7, 32.2, 18.8, 11.7, 11.4;

**HRMS** (ESI) calcd. for  $C_{21}H_{35}OSi$   $[M+H]^+$   $m/z$  331.2452, found 331.2458;

**IR** (neat,  $cm^{-1}$ ) 2940, 2864, 2167, 1510, 1245, 670;

$[\alpha]_D^{18} = -16.6$  ( $c = 1.05$ ,  $CHCl_3$ ); 94% *ee*;

**HPLC analysis** CHIRALCEL two connected OD-H columns, *n*-hexane/*iso*-propanol = 100/0, flow rate 0.5 mL/min, 220 nm UV detector,  $t_R$  (major) = 22.7 min,  $t_R$  (minor)

= 26.5 min.

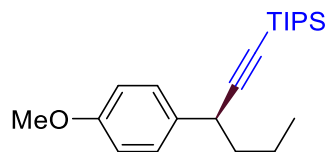

**(S)-Triisopropyl(3-(4-methoxyphenyl)hex-1-yn-1-yl)silane** (Figure 4, **5f**). From **1-(but-1-en-1-yl)-4-methoxybenzene** (**4f**) (32.4 mg, 0.20 mmol) and **(bromoethynyl)triisopropylsilane** (**2a**) (78.4 mg, 0.30 mmol), the title compound was prepared following the general procedure **B** using  $\text{NiI}_2 \cdot x\text{H}_2\text{O}$  (3.8 mg, 5.0 mol%), **(S)-L\*** (3.3 mg, 6.0 mol%),  $\text{K}_3\text{PO}_4 \cdot \text{H}_2\text{O}$  (115.1 mg, 2.5 equiv), NaI (60.0 mg, 2.0 equiv),  $(\text{MeO})_3\text{SiH}$  (64  $\mu\text{L}$ , 0.5 mmol, 2.5 equiv) and anhydrous  $\text{PhCF}_3$  (1.0 mL). The reaction mixture was stirred for 12 h at 0 °C. The crude material was purified by flash column chromatography (petroleum ether) to provide the title compound as a colorless liquid in 82% yield (56.8 mg).

$^1\text{H NMR}$  (500 MHz,  $\text{CDCl}_3$ )  $\delta$  7.35 – 7.30 (m, 2H), 6.90 – 6.86 (m, 2H), 3.82 (s, 3H), 3.69 (dd,  $J = 8.0, 6.3$  Hz, 1H), 1.77 – 1.68 (m, 2H), 1.58 – 1.44 (m, 2H), 1.20 – 1.06 (m, 21H), 0.96 (t,  $J = 7.4$  Hz, 3H);

$^{13}\text{C NMR}$  (126 MHz,  $\text{CDCl}_3$ )  $\delta$  158.3, 134.5, 128.5, 113.7, 110.6, 82.8, 55.3, 41.4, 37.9, 20.5, 18.8, 13.9, 11.4;

**HRMS** (ESI) calcd. for  $\text{C}_{22}\text{H}_{37}\text{OSi}$   $[\text{M}+\text{H}]^+$   $m/z$  345.2608, found 345.2609;

**IR** (neat,  $\text{cm}^{-1}$ ) 2941, 2863, 2170, 1453, 696, 674;

$[\alpha]_{\text{D}}^{18} = -24.4$  ( $c = 1.22$ ,  $\text{CHCl}_3$ ); 94% *ee*;

**HPLC analysis** CHIRALCEL two connected OD-H columns, *n*-hexane/*iso*-propanol = 100/0, flow rate 0.8 mL/min, 220 nm UV detector,  $t_{\text{R}}$  (major) = 13.4 min,  $t_{\text{R}}$  (minor) = 15.6 min.

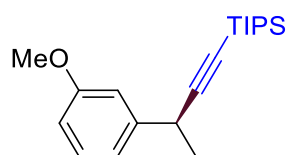

**(S)-Triisopropyl(3-(3-methoxyphenyl)pent-1-yn-1-yl)silane** (Figure 4, **5g**). From **1-**

**methoxy-3-(prop-1-en-1-yl)benzene (4g)** (29.6 mg, 0.20 mmol) and **(bromoethynyl)triisopropylsilane (2a)** (78.4 mg, 0.30 mmol), the title compound was prepared following the general procedure **B** using  $\text{NiI}_2 \cdot x\text{H}_2\text{O}$  (3.8 mg, 5.0 mol%), (*S*)-**L\*** (3.3 mg, 6.0 mol%),  $\text{K}_3\text{PO}_4 \cdot \text{H}_2\text{O}$  (115.1 mg, 2.5 equiv), NaI (60.0 mg, 2.0 equiv),  $(\text{MeO})_3\text{SiH}$  (64  $\mu\text{L}$ , 0.5 mmol, 2.5 equiv) and anhydrous  $\text{PhCF}_3$  (1.0 mL). The reaction mixture was stirred for 12 h at 0 °C. The crude material was purified by flash column chromatography (petroleum ether) to provide the title compound as a colorless liquid in 83% yield (54.6 mg).

$^1\text{H NMR}$  (500 MHz,  $\text{CDCl}_3$ )  $\delta$  7.27 – 7.23 (m, 1H), 7.05 – 7.02 (m, 1H), 6.99 – 6.94 (m, 1H), 6.80 (dd,  $J = 8.2, 2.5$  Hz, 1H), 3.83 (s, 3H), 3.68 (dd,  $J = 8.3, 5.4$  Hz, 1H), 1.88 – 1.71 (m, 2H), 1.17 – 1.06 (m, 21H), 1.06 (t,  $J = 7.4$  Hz, 3H);

$^{13}\text{C NMR}$  (126 MHz,  $\text{CDCl}_3$ )  $\delta$  159.7, 143.7, 129.3, 120.0, 112.9, 112.4, 109.8, 83.4, 55.2, 40.5, 32.1, 18.8, 11.8, 11.4;

**HRMS** (ESI) calcd. for  $\text{C}_{21}\text{H}_{34}\text{OSiNa}$  [ $\text{M}+\text{Na}$ ] $^+$   $m/z$  353.2271, found 353.2272;

**IR** (neat,  $\text{cm}^{-1}$ ) 2940, 2864, 2168, 1487, 881, 665;

$[\alpha]_{\text{D}}^{20} = -26.5$  ( $c = 1.59$ ,  $\text{CHCl}_3$ ); 92% *ee*;

**HPLC analysis** CHIRALCEL two connected OD-H columns, *n*-hexane/*iso*-propanol = 100/0, flow rate 0.8 mL/min, 220 nm UV detector,  $t_{\text{R}}$  (major) = 14.5 min,  $t_{\text{R}}$  (minor) = 16.0 min.

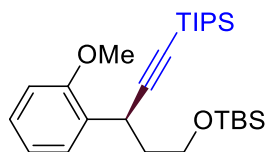

**(S)-tert-Butyl((3-(2-methoxyphenyl)-5-(triisopropylsilyl)pent-4-yn-1-yl)oxy)dimethylsilane** (Figure 4, **5h**). From **tert-butyl((3-(2-methoxyphenyl)allyl)oxy)dimethylsilane (4h)** (55.7 mg, 0.20 mmol) and **(bromoethynyl)triisopropylsilane (2a)** (78.4 mg, 0.30 mmol), the title compound was prepared following the general procedure **B** using  $\text{NiI}_2 \cdot x\text{H}_2\text{O}$  (3.8 mg, 5.0 mol%), (*S*)-**L\*** (3.3 mg, 6.0 mol%),  $\text{K}_3\text{PO}_4 \cdot \text{H}_2\text{O}$  (115.1 mg, 2.5 equiv), NaI (60.0 mg, 2.0 equiv),

(MeO)<sub>3</sub>SiH (64  $\mu$ L, 0.5 mmol, 2.5 equiv) and anhydrous PhCF<sub>3</sub> (1.0 mL). The reaction mixture was stirred for 12 h at 0 °C. The crude material was purified by flash column chromatography (petroleum ether/EtOAc = 100:1) to provide the title compound as a colorless liquid in 88% yield (81.3 mg).

<sup>1</sup>H NMR (500 MHz, CDCl<sub>3</sub>)  $\delta$  7.61 (dd, *J* = 7.5, 1.8 Hz, 1H), 7.23 – 7.18 (m, 1H), 7.00 – 6.92 (m, 1H), 6.84 (dd, *J* = 8.2, 1.1 Hz, 1H), 4.30 (dd, *J* = 10.0, 4.2 Hz, 1H), 3.93 – 3.86 (m, 1H), 3.84 – 3.78 (m, 4H), 2.06 – 1.94 (m, 1H), 1.80 – 1.67 (m, 1H), 1.15 – 1.05 (m, 21H), 0.92 (s, 9H), 0.08 (s, 3H), 0.07 (s, 3H);

<sup>13</sup>C NMR (126 MHz, CDCl<sub>3</sub>)  $\delta$  156.1, 130.4, 128.6, 127.7, 120.6, 110.2, 110.0, 82.7, 61.5, 55.3, 40.0, 29.1, 26.0, 18.9, 18.8, 18.4, 11.4, -5.0, -5.1;

HRMS (ESI) calcd. for C<sub>27</sub>H<sub>48</sub>O<sub>2</sub>Si<sub>2</sub>Na [M+Na]<sup>+</sup> *m/z* 483.3085, found 483.3087;

IR (neat, cm<sup>-1</sup>) 2940, 2863, 2166, 1243, 831, 665;

[ $\alpha$ ]<sub>D</sub><sup>18</sup> = -30.6 (*c* = 1.15, CHCl<sub>3</sub>); 90% *ee*;

HPLC analysis CHIRALCEL two connected OD-H columns, *n*-hexane/*iso*-propanol = 100/0, flow rate 0.5 mL/min, 220 nm UV detector, *t*<sub>R</sub> (minor) = 15.0 min, *t*<sub>R</sub> (major) = 19.1 min.

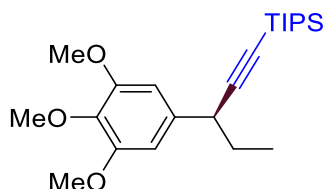

(*S*)-Triisopropyl(3-(3,4,5-trimethoxyphenyl)pent-1-yn-1-yl)silane (Figure 4, **5i**).

From **1,2,3-trimethoxy-5-(prop-1-en-1-yl)benzene (4i)** (41.7 mg, 0.20 mmol) and **(bromoethynyl)triisopropylsilane (2a)** (78.4 mg, 0.30 mmol), the title compound was prepared following the general procedure **B** using NiI<sub>2</sub>·xH<sub>2</sub>O (3.8 mg, 5.0 mol%), (*S*)-**L\*** (3.3 mg, 6.0 mol%), K<sub>3</sub>PO<sub>4</sub>·H<sub>2</sub>O (115.1 mg, 2.5 equiv), NaI (60.0 mg, 2.0 equiv), (MeO)<sub>3</sub>SiH (64  $\mu$ L, 0.5 mmol, 2.5 equiv) and anhydrous PhCF<sub>3</sub> (1.0 mL). The reaction mixture was stirred for 12 h at 0 °C. The crude material was purified by flash column chromatography (petroleum ether/EtOAc = 20:1) to provide the title compound as a colorless liquid in 65% yield (51.0 mg).

**<sup>1</sup>H NMR** (500 MHz, CDCl<sub>3</sub>) δ 6.63 (s, 2H), 3.85 (s, 6H), 3.83 (s, 3H), 3.61 (dd, *J* = 8.4, 5.2 Hz, 1H), 1.87 – 1.76 (m, 1H), 1.76 – 1.63 (m, 1H), 1.14 – 1.02 (m, 21H), 1.03 (t, *J* = 7.3 Hz, 3H);

**<sup>13</sup>C NMR** (126 MHz, CDCl<sub>3</sub>) δ 153.0, 137.8, 136.4, 109.7, 104.4, 83.7, 60.9, 56.0, 40.7, 32.3, 18.9, 18.8, 11.8, 11.4;

**HRMS** (ESI) calcd. for C<sub>23</sub>H<sub>38</sub>O<sub>3</sub>SiNa [M+Na]<sup>+</sup> *m/z* 413.2482, found 413.2481;

**IR** (neat, cm<sup>-1</sup>) 2940, 2864, 2167, 1460, 1127, 674;

[α]<sub>D</sub><sup>18</sup> = -19.5 (c = 1.51, CHCl<sub>3</sub>); 88% *ee*;

**HPLC analysis** CHIRALCEL OD-H column, *n*-hexane/*iso*-propanol = 99/1, flow rate 0.5 mL/min, 220 nm UV detector, *t*<sub>R</sub> (minor) = 10.5 min, *t*<sub>R</sub> (major) = 11.1 min.

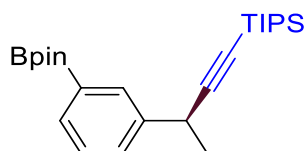

**(S)-Triisopropyl(3-(3-(4,4,5,5-tetramethyl-1,3,2-dioxaborolan-2-yl)phenyl)pent-1-yn-1-yl)silane** (Figure 4, 5j). From **4,4,5,5-tetramethyl-2-(3-(prop-1-en-1-yl)phenyl)-1,3,2-dioxaborolane** (**4j**) (48.8 mg, 0.20 mmol) and **(bromoethynyl)triisopropylsilane** (**2a**) (78.4 mg, 0.30 mmol), the title compound was prepared following the general procedure **B** using NiI<sub>2</sub>·xH<sub>2</sub>O (3.8 mg, 5.0 mol%), (*S*)-**L\*** (3.3 mg, 6.0 mol%), K<sub>3</sub>PO<sub>4</sub>·H<sub>2</sub>O (115.1 mg, 2.5 equiv), NaI (60.0 mg, 2.0 equiv), (MeO)<sub>3</sub>SiH (64 μL, 0.5 mmol, 2.5 equiv) and anhydrous PhCF<sub>3</sub> (1.0 mL). The reaction mixture was stirred for 12 h at 0 °C. The crude material was purified by flash column chromatography (petroleum ether/EtOAc = 50:1) to provide the title compound as a colorless liquid in 82% yield (69.8 mg).

**<sup>1</sup>H NMR** (500 MHz, CDCl<sub>3</sub>) δ 7.90 – 7.86 (m, 1H), 7.72 – 7.67 (m, 1H), 7.57 – 7.48 (m, 1H), 7.39 – 7.32 (m, 1H), 3.69 (dd, *J* = 8.5, 5.4 Hz, 1H), 1.90 – 1.81 (m, 1H), 1.81 – 1.71 (m, 1H), 1.37 (s, 12H), 1.20 – 1.09 (m, 21H), 1.06 (t, *J* = 7.3 Hz, 3H);

**<sup>13</sup>C NMR** (126 MHz, CDCl<sub>3</sub>) δ 141.3, 134.1, 133.0, 130.5, 127.8, 110.0, 83.8, 83.4, 40.5, 32.1, 25.0, 24.9, 18.8, 11.9, 11.4;



**HRMS** (ESI) calcd. for C<sub>26</sub>H<sub>43</sub>BO<sub>2</sub>SiNa [M+Na]<sup>+</sup> m/z 449.3018, found 449.3017;

**IR** (neat, cm<sup>-1</sup>) 2940, 2864, 2168, 1357, 882, 674;

[α]<sub>D</sub><sup>18</sup> = -15.7 (c = 1.59, CHCl<sub>3</sub>); 90% *ee*;

**HPLC analysis** CHIRALCEL two connected OD-H columns, *n*-hexane/*iso*-propanol = 100/0, flow rate 0.3 mL/min, 220 nm UV detector, *t*<sub>R</sub> (major) = 28.2 min, *t*<sub>R</sub> (minor) = 29.4 min.

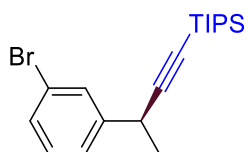

**(S)-3-(3-Bromophenyl)pent-1-yn-1-yltriisopropylsilane** (Figure 4, **5k**). From **1-bromo-3-(prop-1-en-1-yl)benzene** (**4k**) (39.4 mg, 0.20 mmol) and **(bromoethynyl)triisopropylsilane** (**2a**) (78.4 mg, 0.30 mmol), the title compound was prepared following the general procedure **B** using NiBr<sub>2</sub>·diglyme (3.5 mg, 5.0 mol%), (*S*)-**L**\* (3.3 mg, 6.0 mol%), K<sub>3</sub>PO<sub>4</sub>·H<sub>2</sub>O (115.1 mg, 2.5 equiv), NaI (90.0 mg, 3.0 equiv), (MeO)<sub>3</sub>SiH (64 μL, 0.5 mmol, 2.5 equiv) and anhydrous DCE (1.0 mL). The reaction mixture was stirred for 12 h at 0 °C. The crude material was purified by flash column chromatography (petroleum ether) to provide the title compound as a colorless liquid in 66% yield (49.6 mg).

<sup>1</sup>H NMR (500 MHz, CDCl<sub>3</sub>) δ 7.58 – 7.55 (m, 1H), 7.38 – 7.34 (m, 1H), 7.32 – 7.28 (m, 1H), 7.18 (t, *J* = 7.8 Hz, 1H), 3.63 (dd, *J* = 8.2, 5.4 Hz, 1H), 1.85 – 1.77 (m, 1H), 1.77 – 1.65 (m, 1H), 1.13 – 1.03 (m, 21H), 1.02 (t, *J* = 7.3 Hz, 3H);

<sup>13</sup>C NMR (126 MHz, CDCl<sub>3</sub>) δ 144.4, 130.9, 129.9, 129.7, 126.3, 122.5, 108.9, 84.3, 40.1, 31.9, 18.8, 11.7, 11.4;

**HRMS** (ESI) calcd. for C<sub>20</sub>H<sub>31</sub>BrSiNa [M+Na]<sup>+</sup> m/z 401.1271, found 401.1272;

**IR** (neat, cm<sup>-1</sup>) 2940, 2864, 2169, 1462, 881, 675;

[α]<sub>D</sub><sup>18</sup> = -22.9 (c = 1.26, CHCl<sub>3</sub>); 94% *ee*;

**HPLC analysis** CHIRALPAK IE-3 column, *n*-hexane/*iso*-propanol = 100/0, flow rate 0.3 mL/min, 220 nm UV detector, *t*<sub>R</sub> (minor) = 13.3 min, *t*<sub>R</sub> (major) = 13.8 min.

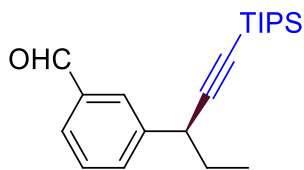

**(S)-3-(1-(Triisopropylsilyl)pent-1-yn-3-yl)benzaldehyde** (Figure 4, **5l**). From **3-(prop-1-en-1-yl)benzaldehyde** (**4l**) (29.2 mg, 0.20 mmol) and **(bromoethynyl)triisopropylsilane** (**2a**) (78.4 mg, 0.30 mmol), the title compound was prepared following the general procedure **B** using  $\text{NiI}_2 \cdot x\text{H}_2\text{O}$  (3.8 mg, 5.0 mol%), (*S*)-**L\*** (3.3 mg, 6.0 mol%),  $\text{K}_3\text{PO}_4 \cdot \text{H}_2\text{O}$  (115.1 mg, 2.5 equiv), NaI (60.0 mg, 2.0 equiv),  $(\text{MeO})_3\text{SiH}$  (64  $\mu\text{L}$ , 0.5 mmol, 2.5 equiv) and anhydrous  $\text{PhCF}_3$  (1.0 mL). The reaction mixture was stirred for 12 h at 0 °C. The crude material was purified by flash column chromatography (petroleum ether/EtOAc = 50:1) to provide the title compound as a colorless liquid in 52% yield (34.4 mg).

$^1\text{H NMR}$  (500 MHz,  $\text{CDCl}_3$ )  $\delta$  10.01 (s, 1H), 7.95 – 7.89 (m, 1H), 7.77 – 7.73 (m, 1H), 7.69 – 7.59 (m, 1H), 7.49 (t,  $J = 7.6$  Hz, 1H), 3.75 (dd,  $J = 8.2, 5.5$  Hz, 1H), 1.89 – 1.81 (m, 1H), 1.81 – 1.71 (m, 1H), 1.11 – 1.08 (m, 21H), 1.03 (t,  $J = 7.4$  Hz, 3H);

$^{13}\text{C NMR}$  (126 MHz,  $\text{CDCl}_3$ )  $\delta$  192.4, 143.3, 136.6, 133.8, 129.2, 129.1, 128.0, 108.9, 84.4, 40.2, 31.9, 18.8, 11.6, 11.4;

**HRMS** (ESI) calcd. for  $\text{C}_{21}\text{H}_{32}\text{OSiNa}$   $[\text{M}+\text{Na}]^+$   $m/z$  351.2115, found 351.2113;

**IR** (neat,  $\text{cm}^{-1}$ ) 2940, 2864, 2169, 1696, 738, 675;

$[\alpha]_{\text{D}}^{18} = -24.0$  ( $c = 0.95$ ,  $\text{CHCl}_3$ ); 92% *ee*;

**HPLC analysis** CHIRALCEL two connected OD-H columns, *n*-hexane/*iso*-propanol = 100/0, flow rate 0.5 mL/min, 220 nm UV detector,  $t_{\text{R}}$  (major) = 38.3 min,  $t_{\text{R}}$  (minor) = 42.7 min.

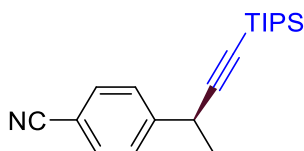

**(S)-4-(1-(Triisopropylsilyl)pent-1-yn-3-yl)benzotrile** (Figure 4, **5m**). From **4-(prop-1-en-1-yl)benzotrile** (**4m**) (28.6 mg, 0.20 mmol) and

(bromoethynyl)triisopropylsilane (**2a**) (78.4 mg, 0.30 mmol), the title compound was prepared following the general procedure **B** using NiBr<sub>2</sub>·diglyme (3.5 mg, 5.0 mol%), (*S*)-**L**\* (3.3 mg, 6.0 mol%), K<sub>3</sub>PO<sub>4</sub>·H<sub>2</sub>O (115.1 mg, 2.5 equiv), NaI (90.0 mg, 3.0 equiv), (MeO)<sub>3</sub>SiH (64 μL, 0.5 mmol, 2.5 equiv and anhydrous DCE (1.0 mL). The reaction mixture was stirred for 12 h at 0 °C. The crude material was purified by flash column chromatography (petroleum ether/EtOAc = 50:1) to provide the title compound as a colorless liquid in 62% yield (40.1 mg).

<sup>1</sup>H NMR (500 MHz, CDCl<sub>3</sub>) δ 7.64 – 7.58 (m, 2H), 7.51 – 7.44 (m, 2H), 3.71 (dd, *J* = 8.3, 5.5 Hz, 1H), 1.85 – 1.77 (m, 1H), 1.77 – 1.67 (m, 1H), 1.12 – 1.02 (m, 21H), 1.01 (t, *J* = 7.4 Hz, 3H);

<sup>13</sup>C NMR (126 MHz, CDCl<sub>3</sub>) δ 147.6, 132.3, 128.4, 119.0, 110.6, 108.1, 84.9, 40.6, 31.8, 18.7, 11.6, 11.3;

HRMS (ESI) calcd. for C<sub>21</sub>H<sub>31</sub>NSiNa [M+Na]<sup>+</sup> *m/z* 348.2118 found 348.2121;

IR (neat, cm<sup>-1</sup>) 2940, 2864, 2229, 2169, 882, 665;

[α]<sub>D</sub><sup>18</sup> = -14.7 (c = 0.38, CHCl<sub>3</sub>); 94% *ee*;

HPLC analysis CHIRALCEL two connected OD-H columns, *n*-hexane/*iso*-propanol = 100/0, flow rate 0.5 mL/min, 220 nm UV detector, *t*<sub>R</sub> (minor) = 39.4 min, *t*<sub>R</sub> (major) = 41.3 min.

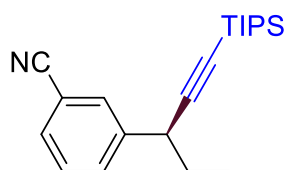

(*S*)-3-(1-(Triisopropylsilyl)pent-1-yn-3-yl)benzotrile (Figure 4, **5n**). From **4**-(prop-1-en-1-yl)benzotrile (**4n**) (28.6 mg, 0.20 mmol) and (bromoethynyl)triisopropylsilane (**2a**) (78.4 mg, 0.30 mmol), the title compound was prepared following the general procedure **B** using NiI<sub>2</sub>·xH<sub>2</sub>O (3.8 mg, 5.0 mol%), (*S*)-**L**\* (3.3 mg, 6.0 mol%), K<sub>3</sub>PO<sub>4</sub>·H<sub>2</sub>O (115.1 mg, 2.5 equiv), NaI (60.0 mg, 2.0 equiv), (MeO)<sub>3</sub>SiH (64 μL, 0.5 mmol, 2.5 equiv) and anhydrous DCE (1.0 mL). The reaction mixture was stirred for 12 h at 0 °C. The crude material was purified by flash column

chromatography (petroleum ether/EtOAc = 100:1) to provide the title compound as a colorless liquid in 65% yield (42.4 mg).

$^1\text{H NMR}$  (500 MHz,  $\text{CDCl}_3$ )  $\delta$  7.70 – 7.67 (m, 1H), 7.63 – 7.59 (m, 1H), 7.55 – 7.51 (m, 1H), 7.42 (t,  $J = 7.7$  Hz, 1H), 3.69 (dd,  $J = 8.2, 5.5$  Hz, 1H), 1.86 – 1.67 (m, 2H), 1.12 – 1.06 (m, 21H), 1.02 (t,  $J = 7.3$  Hz, 3H);

$^{13}\text{C NMR}$  (126 MHz,  $\text{CDCl}_3$ )  $\delta$  143.6, 132.2, 131.4, 130.5, 129.2, 119.0, 112.5, 108.1, 85.0, 40.1, 31.8, 18.7, 11.6, 11.4;

**HRMS** (ESI) calcd. for  $\text{C}_{21}\text{H}_{32}\text{NSi}$   $[\text{M}+\text{H}]^+$   $m/z$  326.2299 found 326.2296;

**IR** (neat,  $\text{cm}^{-1}$ ) 2964, 2864, 2231, 2169, 882, 664;

$[\alpha]_D^{18} = -21.4$  ( $c = 0.29$ ,  $\text{CHCl}_3$ ); 94% *ee*;

**HPLC analysis** CHIRALPAK AD-H column, *n*-hexane/*iso*-propanol = 100/0, flow rate 0.8 mL/min, 220 nm UV detector,  $t_R$  (minor) = 13.5 min,  $t_R$  (major) = 19.3 min.

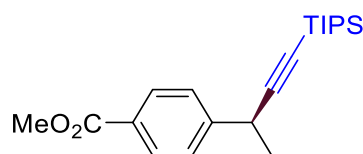

**Methyl (S)-4-(1-(triisopropylsilyl)pent-1-yn-3-yl)benzoate** (Figure 4, **5o**). From **methyl 4-(prop-1-en-1-yl)benzoate** (**4o**) (35.2 mg, 0.20 mmol) and **(bromoethynyl)triisopropylsilane** (**2a**) (78.4 mg, 0.30 mmol), the title compound was prepared following the general procedure **B** using  $\text{NiBr}_2 \cdot \text{diglyme}$  (3.5 mg, 5.0 mol%), (*S*)-**L\*** (3.3 mg, 6.0 mol%),  $\text{K}_3\text{PO}_4 \cdot \text{H}_2\text{O}$  (115.1 mg, 2.5 equiv),  $\text{NaI}$  (90.0 mg, 3.0 equiv),  $(\text{MeO})_3\text{SiH}$  (64  $\mu\text{L}$ , 0.5 mmol, 2.5 equiv) and anhydrous DCE (1.0 mL). The reaction mixture was stirred for 12 h at 0 °C. The crude material was purified by flash column chromatography (petroleum ether/EtOAc = 50:1) to provide the title compound as a colorless liquid in 65% yield (46.5 mg).

$^1\text{H NMR}$  (500 MHz,  $\text{CDCl}_3$ )  $\delta$  8.09 – 7.92 (m, 2H), 7.48 – 7.41 (m, 2H), 3.90 (s, 3H), 3.70 (dd,  $J = 8.3, 5.5$  Hz, 1H), 1.86 – 1.64 (m, 2H), 1.17 – 0.98 (m, 21H), 1.02 (t,  $J = 7.3$  Hz, 3H);

$^{13}\text{C NMR}$  (126 MHz,  $\text{CDCl}_3$ )  $\delta$  167.1, 147.4, 129.8, 128.6, 127.7, 108.9, 84.1, 52.1,

40.5, 31.9, 18.7, 11.6, 11.4;

**HRMS** (ESI) calcd. for  $C_{22}H_{35}O_2Si$   $[M+H]^+$   $m/z$  359.2401, found 359.2405;

**IR** (neat,  $cm^{-1}$ ) 2941, 2864, 2168, 1715, 1276, 663;

$[\alpha]_D^{18} = -15.6$  ( $c = 1.45$ ,  $CHCl_3$ ); 96% *ee*;

**HPLC analysis** CHIRALCEL two connected OD-H columns, *n*-hexane/*iso*-propanol = 100/0, flow rate 0.8 mL/min, 220 nm UV detector,  $t_R$  (major) = 27.8 min,  $t_R$  (minor) = 30.7 min.

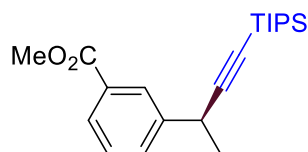

**Methyl (S)-3-(1-(triisopropylsilyl)pent-1-yn-3-yl)benzoate** (Figure 4, **5p**). From **methyl 3-(prop-1-en-1-yl)benzoate (4p)** (35.2 mg, 0.20 mmol) and **(bromoethynyl)triisopropylsilane (2a)** (78.4 mg, 0.30 mmol), the title compound was prepared following the general procedure **B** using  $NiI_2 \cdot xH_2O$  (3.8 mg, 5.0 mol%), **(S)-L\*** (3.3 mg, 6.0 mol%),  $K_3PO_4 \cdot H_2O$  (115.1 mg, 2.5 equiv), NaI (60.0 mg, 2.0 equiv),  $(MeO)_3SiH$  (64  $\mu$ L, 0.5 mmol, 2.5 equiv) and anhydrous  $PhCF_3$  (1.0 mL). The reaction mixture was stirred for 12 h at 0 °C. The crude material was purified by flash column chromatography (petroleum ether/EtOAc = 50:1) to provide the title compound as a colorless liquid in 83% yield (59.6mg).

**$^1H$  NMR** (500 MHz,  $CDCl_3$ )  $\delta$  8.13 – 8.06 (m, 1H), 7.94 – 7.89 (m, 1H), 7.62 – 7.53 (m, 1H), 7.39 (t,  $J = 7.7$  Hz, 1H), 3.91 (s, 3H), 3.72 (dd,  $J = 8.2, 5.4$  Hz, 1H), 1.88 – 1.70 (m, 2H), 1.12 – 1.08 (m, 21H), 1.02 (t,  $J = 7.3$  Hz, 3H);

**$^{13}C$  NMR** (126 MHz,  $CDCl_3$ )  $\delta$  167.2, 142.4, 132.2, 130.3, 128.9, 128.4, 128.0, 109.2, 84.2, 52.1, 40.3, 32.0, 18.8, 11.7, 11.4;

**HRMS** (ESI) calcd. for  $C_{22}H_{35}O_2Si$   $[M+H]^+$   $m/z$  359.2401, found 359.2405;

**IR** (neat,  $cm^{-1}$ ) 2941, 2864, 2169, 1726, 1281, 665;

$[\alpha]_D^{18} = -31.5$  ( $c = 0.59$ ,  $CHCl_3$ ); 94% *ee*;

**HPLC analysis** CHIRALCEL OD-H column, *n*-hexane/*iso*-propanol = 100/0, flow

rate 0.5 mL/min, 220 nm UV detector,  $t_R$  (major) = 20.5 min,  $t_R$  (minor) = 22.2 min.

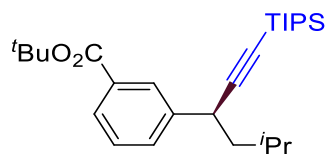

**tert-Butyl (S)-3-(5-methyl-1-(triisopropylsilyl)hex-1-yn-3-yl)benzoate** (Figure 4, **5q**). From **tert-butyl 3-(3-methylbut-1-en-1-yl)benzoate** (**4q**) (49.3 mg, 0.20 mmol) and **(bromoethynyl)triisopropylsilane** (**2a**) (78.4 mg, 0.30 mmol), the title compound was prepared following the general procedure **B** using  $\text{NiI}_2 \cdot x\text{H}_2\text{O}$  (3.8 mg, 5.0 mol%), (*S*)-**L\*** (3.3 mg, 6.0 mol%),  $\text{K}_3\text{PO}_4 \cdot \text{H}_2\text{O}$  (115.1 mg, 2.5 equiv), NaI (60.0 mg, 2.0 equiv),  $(\text{MeO})_3\text{SiH}$  (64  $\mu\text{L}$ , 0.5 mmol, 2.5 equiv) and anhydrous  $\text{PhCF}_3$  (1.0 mL). The reaction mixture was stirred for 12 h at 0 °C. The crude material was purified by flash column chromatography (petroleum ether/EtOAc = 100:1) to provide the title compound as a colorless liquid in 71% yield (60.5 mg).

**$^1\text{H}$  NMR** (500 MHz,  $\text{CDCl}_3$ )  $\delta$  7.97 – 7.93 (m, 1H), 7.87 – 7.82 (m, 1H), 7.57 – 7.53 (m, 1H), 7.36 (t,  $J = 7.7$  Hz, 1H), 3.76 (dd,  $J = 10.1, 5.7$  Hz, 1H), 1.95 – 1.84 (m, 1H), 1.74 – 1.67 (m, 1H), 1.59 (s, 9H), 1.51 – 1.40 (m, 1H), 1.12 – 0.98 (m, 21H), 0.97 (d,  $J = 6.6$  Hz, 3H), 0.94 (d,  $J = 6.7$  Hz, 3H);

**$^{13}\text{C}$  NMR** (126 MHz,  $\text{CDCl}_3$ )  $\delta$  165.9, 143.1, 132.3, 131.6, 128.5, 128.4, 127.8, 109.7, 83.4, 81.1, 48.5, 37.1, 28.3, 26.3, 23.2, 21.7, 18.9, 18.8, 11.4;

**HRMS** (ESI) calcd. for  $\text{C}_{27}\text{H}_{44}\text{O}_2\text{SiNa}$   $[\text{M}+\text{Na}]^+$   $m/z$  451.3003, found 451.3004;

**IR** (neat,  $\text{cm}^{-1}$ ) 2941, 2865, 2168, 1715, 1291, 1159;

**$[\alpha]_D^{18}$**  = -26.2 ( $c = 1.27$ ,  $\text{CHCl}_3$ ); 94% *ee*;

**HPLC analysis** CHIRALCEL two connected OD-H columns, *n*-hexane/*iso*-propanol = 100/0, flow rate 0.5 mL/min, 220 nm UV detector,  $t_R$  (minor) = 19.2 min,  $t_R$  (major) = 19.9 min.

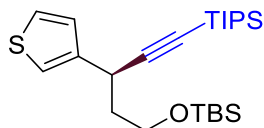

**(R)-tert-Butyldimethyl((3-(thiophen-3-yl)-5-(triisopropylsilyl)pent-4-yn-1-yl)oxy)silane** (Figure 4, **5r**). From **tert-butyl dimethyl((3-(thiophen-3-yl)allyl)oxy)silane** (**4r**) (50.9 mg, 0.20 mmol) and **(bromoethynyl)triisopropylsilane** (**2a**) (78.4 mg, 0.30 mmol), the title compound was prepared following the general procedure **B** using  $\text{NiI}_2 \cdot x\text{H}_2\text{O}$  (3.8 mg, 5.0 mol%), (*S*)-**L\*** (3.3 mg, 6.0 mol%),  $\text{K}_3\text{PO}_4 \cdot \text{H}_2\text{O}$  (115.1 mg, 2.5 equiv), NaI (60.0 mg, 2.0 equiv),  $(\text{MeO})_3\text{SiH}$  (64  $\mu\text{L}$ , 0.5 mmol, 2.5 equiv) and anhydrous  $\text{PhCF}_3$  (1.0 mL). The reaction mixture was stirred for 12 h at 0 °C. The crude material was purified by flash column chromatography (petroleum ether) to provide the title compound as a colorless liquid in 88% yield (76.8 mg).

**$^1\text{H}$  NMR** (500 MHz,  $\text{CDCl}_3$ )  $\delta$  7.29 – 7.25 (m, 1H), 7.21 – 7.17 (m, 1H), 7.07 (dd,  $J = 5.0, 1.3$  Hz, 1H), 3.98 (dd,  $J = 9.6, 5.1$  Hz, 1H), 3.90 – 3.83 (m, 1H), 3.77 – 3.69 (m, 1H), 2.07 – 1.97 (m, 1H), 1.96 – 1.84 (m, 1H), 1.15 – 1.03 (m, 21H), 0.91 (s, 9H), 0.08 (s, 3H), 0.07 (s, 3H);

**$^{13}\text{C}$  NMR** (126 MHz,  $\text{CDCl}_3$ )  $\delta$  142.5, 127.2, 125.7, 120.9, 109.5, 82.8, 60.7, 40.8, 30.6, 26.1, 18.8, 18.4, 11.4, -5.1, -5.2;

**HRMS** (ESI) calcd. for  $\text{C}_{24}\text{H}_{44}\text{OSSi}_2\text{Na}$   $[\text{M}+\text{Na}]^+$   $m/z$  459.2544, found 459.2549;

**IR** (neat,  $\text{cm}^{-1}$ ) 2941, 2863, 2168, 1103, 831, 775;

$[\alpha]_{\text{D}}^{18} = -22.0$  ( $c = 1.10$ ,  $\text{CHCl}_3$ ); 82% *ee*;

**HPLC analysis** CHIRALCEL two connected OD-H columns, *n*-hexane/*iso*-propanol = 100/0, flow rate 0.3 mL/min, 220 nm UV detector,  $t_{\text{R}}$  (major) = 24.5 min,  $t_{\text{R}}$  (minor) = 25.4 min.

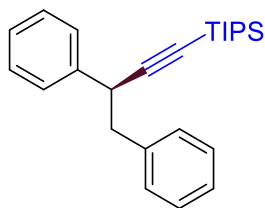

**(S)-(3,4-Diphenylbut-1-yn-1-yl)triisopropylsilane** (Figure 4, **5s**). From **(E)-1,2-diphenylethene (4s)** (36.1 mg, 0.20 mmol) and **(bromoethynyl)triisopropylsilane (2a)** (78.4 mg, 0.30 mmol), the title compound was prepared following the general procedure **B** using  $\text{NiI}_2 \cdot x\text{H}_2\text{O}$  (3.8 mg, 5.0 mol%), **(S)-L\*** (3.3 mg, 6.0 mol%),  $\text{K}_3\text{PO}_4 \cdot \text{H}_2\text{O}$  (115.1 mg, 2.5 equiv), NaI (60.0 mg, 2.0 equiv),  $(\text{MeO})_3\text{SiH}$  (64  $\mu\text{L}$ , 0.5 mmol, 2.5 equiv) and anhydrous  $\text{PhCF}_3$  (1.0 mL). The reaction mixture was stirred for 12 h at 0 °C. The crude material was purified by flash column chromatography (petroleum ether/EtOAc = 100:1) to provide the title compound as a colorless liquid in 73% yield (52.9 mg).

$^1\text{H NMR}$  (500 MHz,  $\text{CDCl}_3$ )  $\delta$  7.39 – 7.31 (m, 4H), 7.29 – 7.21 (m, 4H), 7.20 – 7.15 (m, 2H), 4.00 (dd,  $J = 8.5, 6.1$  Hz, 1H), 3.16 – 2.93 (m, 2H), 1.13 – 0.85 (m, 21H);

$^{13}\text{C NMR}$  (126 MHz,  $\text{CDCl}_3$ )  $\delta$  141.5, 138.9, 129.6, 128.4, 128.0, 127.8, 126.8, 126.4, 109.2, 84.5, 45.5, 41.3, 18.7, 11.4;

**HRMS** (ESI) calcd. for  $\text{C}_{25}\text{H}_{34}\text{SiNa}$   $[\text{M}+\text{Na}]^+$   $m/z$  385.2322, found 385.2325;

**IR** (neat,  $\text{cm}^{-1}$ ) 2941, 2863, 2170, 1453, 882, 696;

$[\alpha]_{\text{D}}^{18} = -20.7$  ( $c = 1.16$ ,  $\text{CHCl}_3$ ); 94% *ee*;

**HPLC analysis** CHIRALCEL two connected OD-H columns, *n*-hexane/*iso*-propanol = 100/0, flow rate 0.8 mL/min, 220 nm UV detector,  $t_{\text{R}}$  (minor) = 16.7 min,  $t_{\text{R}}$  (major) = 19.6 min.

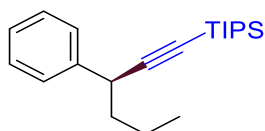

**(S)-Triisopropyl(3-phenylhex-1-yn-1-yl)silane** (Figure 4, **5t**). From **but-1-en-1-ylbenzene (4t)** (26.4 mg, 0.20 mmol) and **(bromoethynyl)triisopropylsilane (2a)**



(78.4 mg, 0.30 mmol), the title compound was prepared following the general procedure **B** using NiI<sub>2</sub>·xH<sub>2</sub>O (3.8 mg, 5.0 mol%), (*S*)-**L**\* (3.3 mg, 6.0 mol%), K<sub>3</sub>PO<sub>4</sub>·H<sub>2</sub>O (115.1 mg, 2.5 equiv), NaI (60.0 mg, 2.0 equiv), (MeO)<sub>3</sub>SiH (64 μL, 0.5 mmol, 2.5 equiv) and anhydrous PhCF<sub>3</sub> (1.0 mL). The reaction mixture was stirred for 12 h at 0 °C. The crude material was purified by flash column chromatography (petroleum ether) to provide the title compound as a colorless liquid in 81% yield (50.9 mg).

<sup>1</sup>H NMR (500 MHz, CDCl<sub>3</sub>) δ 7.42 – 7.37 (m, 2H), 7.35 – 7.29 (m, 2H), 7.25 – 7.18 (m, 1H), 3.72 (dd, *J* = 7.9, 6.5 Hz, 1H), 1.78 – 1.65 (m, 2H), 1.58 – 1.41 (m, 2H), 1.10 (t, *J* = 2.8 Hz, 21H), 0.94 (t, *J* = 7.4 Hz, 3H);

<sup>13</sup>C NMR (126 MHz, CDCl<sub>3</sub>) δ 142.4, 128.4, 127.6, 126.5, 110.2, 83.1, 41.3, 38.8, 20.6, 18.8, 13.9, 11.4;

HRMS (ESI) calcd. for C<sub>21</sub>H<sub>34</sub>SiNa [M+Na]<sup>+</sup> *m/z* 337.2322, found 337.2321;

IR (neat, cm<sup>-1</sup>) 2940, 2864, 2167, 1462, 882, 670;

[α]<sub>D</sub><sup>18</sup> = -18.2 (c = 1.44, CHCl<sub>3</sub>); 92% *ee*;

HPLC analysis CHIRALCEL two connected OD-H columns, *n*-hexane/*iso*-propanol = 100/0, flow rate 0.3 mL/min, 220 nm UV detector, *t*<sub>R</sub> (major) = 24.5 min, *t*<sub>R</sub> (minor) = 25.2 min.

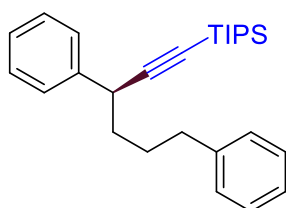

**(*S*)-(3,6-Diphenylhex-1-yn-1-yl)triisopropylsilane** (Figure 4, **5u**). From **but-1-ene-1,4-diyl**dibenzene (**4u**) (41.7 mg, 0.20 mmol) and **(bromoethynyl)triisopropylsilane** (**2a**) (78.4 mg, 0.30 mmol), the title compound was prepared following the general procedure **B** using NiI<sub>2</sub>·xH<sub>2</sub>O (3.8 mg, 5.0 mol%), (*S*)-**L**\* (3.3 mg, 6.0 mol%), K<sub>3</sub>PO<sub>4</sub>·H<sub>2</sub>O (115.1 mg, 2.5 equiv), NaI (60.0 mg, 2.0 equiv), (MeO)<sub>3</sub>SiH (64 μL, 0.5 mmol, 2.5 equiv) and anhydrous PhCF<sub>3</sub> (1.0 mL). The reaction mixture was stirred for

12 h at 0 °C. The crude material was purified by flash column chromatography (petroleum ether) to provide the title compound as a colorless liquid in 90% yield (70.2 mg).

<sup>1</sup>H NMR (500 MHz, CDCl<sub>3</sub>) δ 7.43 – 7.38 (m, 2H), 7.36 – 7.27 (m, 4H), 7.27 – 7.16 (m, 4H), 3.77 (dd, *J* = 7.8, 5.7 Hz, 1H), 2.73 – 2.56 (m, 2H), 1.96 – 1.72 (m, 4H), 1.15 – 1.10 (m, 21H);

<sup>13</sup>C NMR (126 MHz, CDCl<sub>3</sub>) δ 142.3, 142.1, 128.6, 128.5, 128.4, 127.5, 126.6, 125.8, 109.9, 83.5, 38.8, 38.6, 35.6, 29.1, 18.9, 18.8, 11.4;

HRMS (ESI) calcd. for C<sub>27</sub>H<sub>38</sub>SiNa [M+Na]<sup>+</sup> *m/z* 413.2635, found 413.2637;

IR (neat, cm<sup>-1</sup>) 2940, 2863, 2168, 1453, 882, 696;

[α]<sub>D</sub><sup>18</sup> = -25.3 (*c* = 1.37, CHCl<sub>3</sub>); 92% *ee*;

HPLC analysis CHIRALCEL two connected OD-H columns, *n*-hexane/*iso*-propanol = 100/0, flow rate 0.8 mL/min, 220 nm UV detector, *t*<sub>R</sub> (minor) = 16.4 min, *t*<sub>R</sub> (major) = 18.0 min.

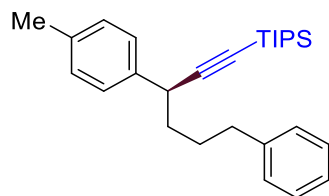

(*S*)-Triisopropyl(6-phenyl-3-(*p*-tolyl)hex-1-yn-1-yl)silane (Figure 4, **5v**). From **1-methyl-4-(4-phenylbut-1-en-1-yl)benzene** (**4v**) (44.5 mg, 0.20 mmol) and (**bromoethynyl**)triisopropylsilane (**2a**) (78.4 mg, 0.30 mmol), the title compound was prepared following the general procedure **B** using NiI<sub>2</sub>·xH<sub>2</sub>O (3.8 mg, 5.0 mol%), (*S*)-**L\*** (3.3 mg, 6.0 mol%), K<sub>3</sub>PO<sub>4</sub>·H<sub>2</sub>O (115.1 mg, 2.5 equiv), NaI (60.0 mg, 2.0 equiv), (MeO)<sub>3</sub>SiH (64 μL, 0.5 mmol, 2.5 equiv) and anhydrous PhCF<sub>3</sub> (1.0 mL). The reaction mixture was stirred for 12 h at 0 °C. The crude material was purified by flash column chromatography (petroleum ether) to provide the title compound as a colorless liquid in 84% yield (67.7 mg).

**<sup>1</sup>H NMR** (500 MHz, CDCl<sub>3</sub>) δ 7.33 – 7.28 (m, 4H), 7.23 – 7.18 (m, 3H), 7.16 (d, *J* = 7.8 Hz, 2H), 3.74 (dd, *J* = 7.8, 5.9 Hz, 1H), 2.75 – 2.61 (m, 2H), 2.37 (s, 3H), 1.95 – 1.84 (m, 2H), 1.83 – 1.76 (m, 2H), 1.16 – 1.10 (m, 21H);

**<sup>13</sup>C NMR** (126 MHz, CDCl<sub>3</sub>) δ 142.4, 139.1, 136.1, 129.1, 128.5, 128.3, 127.4, 125.7, 110.1, 83.2, 38.7, 38.4, 35.6, 29.1, 21.1, 18.8, 11.4;

**HRMS** (ESI) calcd. for C<sub>28</sub>H<sub>40</sub>SiNa [M+Na]<sup>+</sup> *m/z* 427.2791, found 427.2791;

**IR** (neat, cm<sup>-1</sup>) 2940, 2862, 2168, 1454, 882, 675;

**[α]<sub>D</sub><sup>18</sup>** = -21.3 (*c* = 1.26, CHCl<sub>3</sub>); 94% *ee*;

**HPLC analysis** CHIRALCEL two connected OD-H columns, *n*-hexane/*iso*-propanol = 100/0, flow rate 0.8 mL/min, 220 nm UV detector, *t<sub>R</sub>* (minor) = 15.6 min, *t<sub>R</sub>* (major) = 18.9 min.

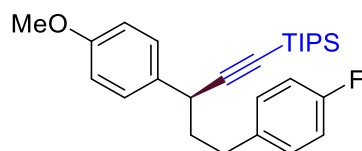

**(S)-5-(4-Fluorophenyl)-3-(4-methoxyphenyl)pent-1-yn-1-yltriisopropylsilane**

(Figure 4, **5w**). From **1-fluoro-4-(3-(4-methoxyphenyl)allyl)benzene (4w)** (48.5 mg, 0.20 mmol) and **(bromoethynyl)triisopropylsilane (2a)** (78.4 mg, 0.30 mmol), the title compound was prepared following the general procedure **B** using NiI<sub>2</sub>·xH<sub>2</sub>O (3.8 mg, 5.0 mol%), (*S*)-**L\*** (3.3 mg, 6.0 mol%), K<sub>3</sub>PO<sub>4</sub>·H<sub>2</sub>O (115.1 mg, 2.5 equiv), NaI (60.0 mg, 2.0 equiv), (MeO)<sub>3</sub>SiH (64 μL, 0.5 mmol, 2.5 equiv) and anhydrous PhCF<sub>3</sub> (1.0 mL). The reaction mixture was stirred for 12 h at 0 °C. The crude material was purified by flash column chromatography (petroleum ether/EtOAc = 100:1) to provide the title compound as a colorless liquid in 89% yield (75.7 mg).

**<sup>1</sup>H NMR** (500 MHz, CDCl<sub>3</sub>) δ 7.36 – 7.29 (m, 2H), 7.19 – 7.13 (m, 2H), 7.02 – 6.95 (m, 2H), 6.93 – 6.85 (m, 2H), 3.82 (s, 3H), 3.70 – 3.64 (m, 1H), 2.87 – 2.76 (m, 2H), 2.05 – 1.96 (m, 2H), 1.21 – 1.09 (m, 21H);

$^{13}\text{C}$  NMR (126 MHz,  $\text{CDCl}_3$ )  $\delta$  161.4 (d,  $J = 243.8$  Hz), 158.4, 137.5 (d,  $J = 3.1$  Hz), 133.9, 129.9 (d,  $J = 7.8$  Hz), 128.4, 115.2 (d,  $J = 20.9$  Hz), 113.9, 109.9, 83.8, 55.3, 41.1, 37.5, 32.8, 18.8, 11.4;

$^{19}\text{F}$  NMR (471 MHz,  $\text{CDCl}_3$ )  $\delta$  -117.6;

HRMS (ESI) calcd. for  $\text{C}_{27}\text{H}_{37}\text{FOSiNa}$   $[\text{M}+\text{Na}]^+$   $m/z$  447.2490, found 447.2489;

IR (neat,  $\text{cm}^{-1}$ ) 2941, 2863, 2168, 1508, 1246, 825;

$[\alpha]_{\text{D}}^{18} = -29.5$  ( $c = 1.35$ ,  $\text{CHCl}_3$ ); 94% *ee*;

HPLC analysis CHIRALCEL two connected OD-H columns, *n*-hexane/*iso*-propanol = 100/0, flow rate 0.5 mL/min, 220 nm UV detector,  $t_{\text{R}}$  (major) = 64.1 min,  $t_{\text{R}}$  (minor) = 81.1 min.

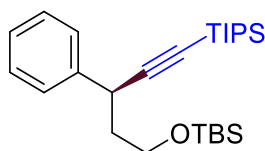

**(*S*)-tert-Butyldimethyl((3-phenyl-5-(triisopropylsilyl)pent-4-yn-1-yl)oxy)silane**

(Figure 4, **5x**). From *tert*-butyl(cinnamyloxy)dimethylsilane (**4x**) (49.7 mg, 0.20 mmol) and (bromoethynyl)triisopropylsilane (**2a**) (78.4 mg, 0.30 mmol), the title compound was prepared following the general procedure **B** using  $\text{NiI}_2 \cdot x\text{H}_2\text{O}$  (3.8 mg, 5.0 mol%), (*S*)-**L**\* (3.3 mg, 6.0 mol%),  $\text{K}_3\text{PO}_4 \cdot \text{H}_2\text{O}$  (115.1 mg, 2.5 equiv), NaI (60.0 mg, 2.0 equiv),  $(\text{MeO})_3\text{SiH}$  (64  $\mu\text{L}$ , 0.5 mmol, 2.5 equiv) and anhydrous  $\text{PhCF}_3$  (1.0 mL). The reaction mixture was stirred for 12 h at 0 °C. The crude material was purified by flash column chromatography (petroleum ether) to provide the title compound as a colorless liquid in 70% yield (60.3 mg).

$^1\text{H}$  NMR (500 MHz,  $\text{CDCl}_3$ )  $\delta$  7.44 – 7.39 (m, 2H), 7.35 – 7.30 (m, 2H), 7.25 – 7.21 (m, 1H), 3.92 (dd,  $J = 9.4, 5.4$  Hz, 1H), 3.90 – 3.84 (m, 1H), 3.76 – 3.70 (m, 1H), 2.04 – 1.88 (m, 2H), 1.19 – 1.06 (m, 21H), 0.93 (s, 9H), 0.09 (s, 3H), 0.08 (s, 3H);

$^{13}\text{C}$  NMR (126 MHz,  $\text{CDCl}_3$ )  $\delta$  142.1, 128.5, 127.6, 126.6, 109.7, 83.4, 60.8, 42.2, 35.2, 26.1, 18.9, 18.8, 18.4, 11.4, -5.1, -5.2;

HRMS (ESI) calcd. for  $\text{C}_{26}\text{H}_{47}\text{OSi}_2$   $[\text{M}+\text{H}]^+$   $m/z$  431.3160, found 431.3154;

**IR** (neat,  $\text{cm}^{-1}$ ) 2942, 2864, 2172, 1741, 1247, 665;

$[\alpha]_{\text{D}}^{18} = -24.4$  ( $c = 1.24$ ,  $\text{CHCl}_3$ ); 90% *ee*;

**HPLC analysis** CHIRALCEL two connected OD-H columns, *n*-hexane/*iso*-propanol = 100/0, flow rate 0.5 mL/min, 220 nm UV detector,  $t_{\text{R}}$  (minor) = 14.3 min,  $t_{\text{R}}$  (major) = 15.0 min.

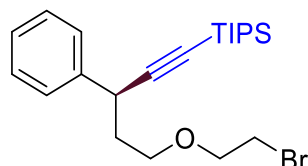

**(S)-5-(2-Bromoethoxy)-3-phenylpent-1-yn-1-yltriisopropylsilane** (Figure 4, **5y**).

From **(E)-3-(2-bromoethoxy)prop-1-en-1-ylbenzene (4y)** (48.2 mg, 0.20 mmol) and **(bromoethynyl)triisopropylsilane (2a)** (78.4 mg, 0.30 mmol), the title compound was prepared following the general procedure **B** using  $\text{NiI}_2 \cdot x\text{H}_2\text{O}$  (3.8 mg, 5.0 mol%), **(S)-L\*** (3.3 mg, 6.0 mol%),  $\text{K}_3\text{PO}_4 \cdot \text{H}_2\text{O}$  (115.1 mg, 2.5 equiv), NaI (60.0 mg, 2.0 equiv),  $(\text{MeO})_3\text{SiH}$  (64  $\mu\text{L}$ , 0.5 mmol, 2.5 equiv) and anhydrous  $\text{PhCF}_3$  (1.0 mL). The reaction mixture was stirred for 12 h at 0 °C. The crude material was purified by flash column chromatography (petroleum ether/EtOAc = 100:1) to provide the title compound as a colorless liquid in 81% yield (68.5 mg).

**$^1\text{H}$  NMR** (500 MHz,  $\text{CDCl}_3$ )  $\delta$  7.44 – 7.40 (m, 2H), 7.36 – 7.30 (m, 2H), 7.26 – 7.22 (m, 1H), 3.95 (dd,  $J = 9.1, 6.0$  Hz, 1H), 3.76 (t,  $J = 6.2$  Hz, 2H), 3.74 – 3.69 (m, 1H), 3.60 – 3.53 (m, 1H), 3.48 (t,  $J = 6.2$  Hz, 2H), 2.09 – 1.90 (m, 2H), 1.22 – 0.89 (m, 21H);

**$^{13}\text{C}$  NMR** (126 MHz,  $\text{CDCl}_3$ )  $\delta$  141.6, 128.5, 127.6, 126.8, 109.4, 83.6, 70.9, 68.6, 38.9, 35.4, 30.5, 18.8, 11.4;

**HRMS** (ESI) calcd. for  $\text{C}_{22}\text{H}_{36}\text{BrOSi}$   $[\text{M}+\text{H}]^+$   $m/z$  423.1713, found 423.1712;

**IR** (neat,  $\text{cm}^{-1}$ ) 2941, 2863, 2167, 1113, 882, 665;

$[\alpha]_{\text{D}}^{18} = -20.7$  ( $c = 1.47$ ,  $\text{CHCl}_3$ ); 88% *ee*;

**HPLC analysis** CHIRALCEL OD-H column, *n*-hexane/*iso*-propanol = 99/1, flow rate 0.5 mL/min, 220 nm UV detector,  $t_{\text{R}}$  (minor) = 7.1 min,  $t_{\text{R}}$  (major) = 11.6 min.

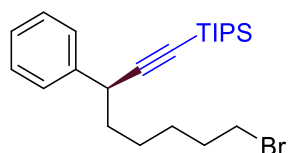

**(S)-(8-Bromo-3-phenyloct-1-yn-1-yl)triisopropylsilane** (Figure 4, **5z**). From **(6-bromohex-1-en-1-yl)benzene** (**4z**) (47.8 mg, 0.20 mmol) and **(bromoethynyl)triisopropylsilane** (**2a**) (78.4 mg, 0.30 mmol), the title compound was prepared following the general procedure **B** using  $\text{NiI}_2 \cdot x\text{H}_2\text{O}$  (3.8 mg, 5.0 mol%), **(S)-L\*** (3.3 mg, 6.0 mol%),  $\text{K}_3\text{PO}_4 \cdot \text{H}_2\text{O}$  (115.1 mg, 2.5 equiv), NaI (60.0 mg, 2.0 equiv),  $(\text{MeO})_3\text{SiH}$  (64  $\mu\text{L}$ , 0.5 mmol, 2.5 equiv) and anhydrous  $\text{PhCF}_3$  (1.0 mL). The reaction mixture was stirred for 12 h at 0 °C. The crude material was purified by flash column chromatography (petroleum ether) to provide the title compound as a colorless liquid in 62% yield (52.0 mg).

**$^1\text{H}$  NMR** (500 MHz,  $\text{CDCl}_3$ )  $\delta$  7.40 – 7.36 (m, 2H), 7.34 – 7.29 (m, 2H), 7.25 – 7.20 (m, 1H), 3.71 (dd,  $J = 8.2, 6.1$  Hz, 1H), 3.39 (t,  $J = 6.8$  Hz, 2H), 1.89 – 1.80 (m, 2H), 1.77 – 1.70 (m, 2H), 1.54 – 1.40 (m, 4H), 1.16 – 1.04 (m, 21H);

**$^{13}\text{C}$  NMR** (126 MHz,  $\text{CDCl}_3$ )  $\delta$  142.1, 128.4, 127.5, 126.6, 109.8, 83.5, 38.9, 38.8, 33.9, 32.8, 27.9, 26.5, 18.8, 11.4;

**HRMS** (ESI) calcd. for  $\text{C}_{23}\text{H}_{38}\text{BrSi}$   $[\text{M}+\text{H}]^+$   $m/z$  421.1921, found 421.1922;

**IR** (neat,  $\text{cm}^{-1}$ ) 2941, 2864, 2169, 1735, 1152, 674;

$[\alpha]_{\text{D}}^{18} = -16.8$  ( $c = 0.57$ ,  $\text{CHCl}_3$ ); 94% *ee*;

**HPLC analysis** CHIRALCEL two connected OD-H columns, *n*-hexane/*iso*-propanol = 100/0, flow rate 0.5 mL/min, 220 nm UV detector,  $t_{\text{R}}$  (major) = 28.3 min,  $t_{\text{R}}$  (minor) = 36.2 min.

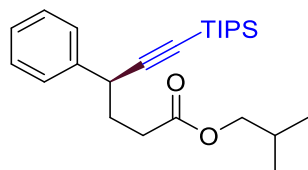

**Isobutyl (S)-4-phenyl-6-(triisopropylsilyl)hex-5-ynoate** (Figure 4, **5a'**). From **isobutyl (E)-4-phenylbut-3-enoate (4a')** (43.7 mg, 0.20 mmol) and **(bromoethynyl)triisopropylsilane (2a)** (78.4 mg, 0.30 mmol), the title compound was prepared following the general procedure **B** using  $\text{NiI}_2 \cdot x\text{H}_2\text{O}$  (3.8 mg, 5.0 mol%), **(S)-L\*** (3.3 mg, 6.0 mol%),  $\text{K}_3\text{PO}_4 \cdot \text{H}_2\text{O}$  (115.1 mg, 2.5 equiv), NaI (60.0 mg, 2.0 equiv),  $(\text{MeO})_3\text{SiH}$  (64  $\mu\text{L}$ , 0.5 mmol, 2.5 equiv) and anhydrous  $\text{PhCF}_3$  (1.0 mL). The reaction mixture was stirred for 12 h at 0 °C. The crude material was purified by flash column chromatography (petroleum ether/EtOAc = 100:1) to provide the title compound as a colorless liquid in 67% yield (53.9 mg).

$^1\text{H NMR}$  (500 MHz,  $\text{CDCl}_3$ )  $\delta$  7.42 – 7.37 (m, 2H), 7.35 – 7.30 (m, 2H), 7.26 – 7.20 (m, 1H), 3.90 – 3.75 (m, 3H), 2.61 – 2.53 (m, 1H), 2.52 – 2.41 (m, 1H), 2.17 – 2.08 (m, 1H), 2.04 – 1.95 (m, 1H), 1.95 – 1.85 (m, 1H), 1.13 – 0.96 (m, 21H), 0.93 (s, 3H), 0.92 (s, 3H);

$^{13}\text{C NMR}$  (126 MHz,  $\text{CDCl}_3$ )  $\delta$  173.4, 141.2, 128.6, 127.6, 126.9, 108.8, 84.4, 70.6, 38.1, 33.9, 31.9, 27.8, 19.2, 18.8, 11.4;

**HRMS** (ESI) calcd. for  $\text{C}_{25}\text{H}_{41}\text{O}_2\text{Si}$   $[\text{M}+\text{H}]^+$   $m/z$  401.2870, found 401.2871;

**IR** (neat,  $\text{cm}^{-1}$ ) 2942, 2864, 2173, 1742, 1151, 664;

$[\alpha]_{\text{D}}^{18} = -12.8$  ( $c = 0.69$ ,  $\text{CHCl}_3$ ); 92% *ee*;

**HPLC analysis** CHIRALPAK two connected AD-H columns, *n*-hexane/*iso*-propanol = 100/0, flow rate 0.5 mL/min, 220 nm UV detector,  $t_{\text{R}}$  (major) = 33.2 min,  $t_{\text{R}}$  (minor) = 38.8 min.

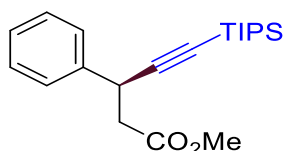

**Methyl (S)-3-phenyl-5-(triisopropylsilyl)pent-4-ynoate** (Figure 4, **5b'**). From **methyl (E)-4-phenylbut-3-enoate (4b')** (32.4 mg, 0.20 mmol) and **(bromoethynyl)triisopropylsilane (2a)** (78.4 mg, 0.30 mmol), the title compound was prepared following the general procedure **B** using  $\text{NiI}_2 \cdot x\text{H}_2\text{O}$  (3.8 mg, 5.0 mol%), **(S)-L\*** (3.3 mg, 6.0 mol%),  $\text{K}_3\text{PO}_4 \cdot \text{H}_2\text{O}$  (115.1 mg, 2.5 equiv), NaI (60.0 mg, 2.0 equiv),  $(\text{MeO})_3\text{SiH}$  (64  $\mu\text{L}$ , 0.5 mmol, 2.5 equiv) and anhydrous  $\text{PhCF}_3$  (1.0 mL). The reaction mixture was stirred for 12 h at 0 °C. The crude material was purified by flash column chromatography (petroleum ether/EtOAc = 50:1) to provide the title compound as a colorless liquid in 66% yield (45.6 mg).

**$^1\text{H}$  NMR** (500 MHz,  $\text{CDCl}_3$ )  $\delta$  7.45 – 7.37 (m, 2H), 7.36 – 7.28 (m, 2H), 7.27 – 7.22 (m, 1H), 4.24 (dd,  $J = 8.9, 6.5$  Hz, 1H), 3.67 (s, 3H), 2.80 (dd,  $J = 15.1, 8.9$  Hz, 1H), 2.73 (dd,  $J = 15.1, 6.5$  Hz, 1H), 1.26 – 0.64 (m, 21H);

**$^{13}\text{C}$  NMR** (126 MHz,  $\text{CDCl}_3$ )  $\delta$  171.4, 140.4, 128.7, 127.5, 127.2, 108.1, 84.1, 51.9, 44.0, 35.4, 18.7, 11.3;

**HRMS** (ESI) calcd. for  $\text{C}_{21}\text{H}_{33}\text{O}_2\text{Si}$   $[\text{M}+\text{H}]^+$   $m/z$  345.2244, found 345.2247;

**IR** (neat,  $\text{cm}^{-1}$ ) 2942, 2864, 2174, 1742, 882, 664;

$[\alpha]_{\text{D}}^{18} = -12.0$  ( $c = 0.93$ ,  $\text{CHCl}_3$ ); 84% *ee*;

**HPLC analysis** CHIRALCEL OD-H column, *n*-hexane/*iso*-propanol = 99/1, flow rate 0.5 mL/min, 220 nm UV detector,  $t_{\text{R}}$  (minor) = 8.1 min,  $t_{\text{R}}$  (major) = 20.9 min.

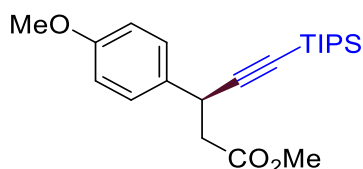

**Methyl (S)-3-(4-methoxyphenyl)-5-(triisopropylsilyl)pent-4-ynoate** (Figure 4, **5c'**). From **methyl (E)-4-(4-methoxyphenyl)but-3-enoate (4c')** (38.4 mg, 0.20 mmol) and **(bromoethynyl)triisopropylsilane (2a)** (78.4 mg, 0.30 mmol), the title compound was



prepared following the general procedure **B** using NiI<sub>2</sub>·xH<sub>2</sub>O (3.8 mg, 5.0 mol%), (*S*)-**L**\* (3.3 mg, 6.0 mol%), K<sub>3</sub>PO<sub>4</sub>·H<sub>2</sub>O (115.1 mg, 2.5 equiv), NaI (60.0 mg, 2.0 equiv), (MeO)<sub>3</sub>SiH (64 μL, 0.5 mmol, 2.5 equiv) and anhydrous PhCF<sub>3</sub> (1.0 mL). The reaction mixture was stirred for 12 h at 0 °C. The crude material was purified by flash column chromatography (petroleum ether/EtOAc = 20:1) to provide the title compound as a colorless liquid in 66% yield (49.1 mg).

<sup>1</sup>H NMR (500 MHz, CDCl<sub>3</sub>) δ 7.35 – 7.29 (m, 2H), 6.91 – 6.81 (m, 2H), 4.18 (dd, *J* = 8.7, 6.7 Hz, 1H), 3.80 (s, 3H), 3.66 (s, 3H), 2.77 (dd, *J* = 15.1, 8.7 Hz, 1H), 2.69 (dd, *J* = 15.1, 6.7 Hz, 1H), 1.12 – 0.90 (m, 21H);

<sup>13</sup>C NMR (126 MHz, CDCl<sub>3</sub>) δ 171.4, 158.7, 132.5, 128.54, 114.0, 108.5, 83.8, 55.4, 51.8, 44.1, 34.6, 18.7, 11.3;

HRMS (ESI) calcd. for C<sub>22</sub>H<sub>34</sub>O<sub>3</sub>SiNa [M+Na]<sup>+</sup> *m/z* 397.2169, found 397.2169;

IR (neat, cm<sup>-1</sup>) 2942, 2864, 2172, 1741, 1247, 665;

[α]<sub>D</sub><sup>18</sup> = -5.3 (*c* = 0.30, CHCl<sub>3</sub>); 86% *ee*;

HPLC analysis CHIRALCEL OD-H column, *n*-hexane/*iso*-propanol = 99/1, flow rate 0.5 mL/min, 220 nm UV detector, *t*<sub>R</sub> (minor) = 9.5 min, *t*<sub>R</sub> (major) = 14.2 min.

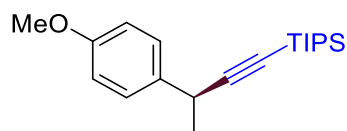

(*S*)-Triisopropyl(3-(4-methoxyphenyl)but-1-yn-1-yl)silane (Figure 4, **5d'**). From 1-methoxy-4-vinylbenzene (**4d'**) (26.8 mg, 0.20 mmol) and (bromoethynyl)triisopropylsilane (**2a**) (78.4 mg, 0.30 mmol), the title compound was prepared following the general procedure **B** using NiI<sub>2</sub>·xH<sub>2</sub>O (3.8 mg, 5.0 mol%), (*S*)-**L**\* (3.3 mg, 6.0 mol%), K<sub>3</sub>PO<sub>4</sub>·H<sub>2</sub>O (115.1 mg, 2.5 equiv), NaI (60.0 mg, 2.0 equiv), (MeO)<sub>3</sub>SiH (64 μL, 0.5 mmol, 2.5 equiv) and anhydrous PhCF<sub>3</sub> (1.0 mL). The reaction mixture was stirred for 12 h at 0 °C. The crude material was purified by flash column chromatography (petroleum ether) to provide the title compound as a colorless liquid in 87% yield (55.0 mg).

<sup>1</sup>H NMR (500 MHz, CDCl<sub>3</sub>) δ 7.38 – 7.31 (m, 2H), 6.89 – 6.83 (m, 2H), 3.84 – 3.74 (m, 4H), 1.49 (d, *J* = 7.1 Hz, 3H), 1.13 – 1.05 (m, 21H);

<sup>13</sup>C NMR (126 MHz, CDCl<sub>3</sub>) δ 158.3, 135.6, 127.9, 113.8, 111.7, 82.1, 55.3, 32.2, 25.3, 18.8, 11.4;

HRMS (ESI) calcd. for C<sub>20</sub>H<sub>33</sub>OSi [M+H]<sup>+</sup> *m/z* 317.2295, found 317.2294;

IR (neat, cm<sup>-1</sup>) 2940, 2864, 2164, 1510, 1243, 665;

[α]<sub>D</sub><sup>18</sup> = -4.0 (c = 1.15 CHCl<sub>3</sub>); 92% *ee*;

HPLC analysis CHIRALCEL two connected OD-H columns, *n*-hexane/*iso*-propanol = 100/0, flow rate 0.5 mL/min, 220 nm UV detector, *t*<sub>R</sub> (major) = 24.9 min, *t*<sub>R</sub> (minor) = 26.5 min.

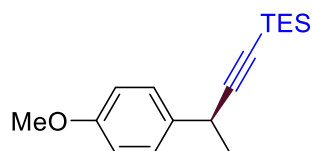

(*S*)-Triethyl(3-(4-methoxyphenyl)pent-1-yn-1-yl)silane (Figure 4, **5e'**). From (*E*)-1-methoxy-4-(prop-1-en-1-yl)benzene (**4e**) (29.6 mg, 0.20 mmol) and (bromoethynyl)triethylsilane (**2e**) (65.8 mg, 0.30 mmol), the title compound was prepared following the general procedure **B** using NiI<sub>2</sub>·xH<sub>2</sub>O (3.8 mg, 5.0 mol%), (*S*)-**L\*** (3.3 mg, 6.0 mol%), K<sub>3</sub>PO<sub>4</sub>·H<sub>2</sub>O (115.1 mg, 2.5 equiv), NaI (60.0 mg, 2.0 equiv), (MeO)<sub>3</sub>SiH (64 μL, 0.5 mmol, 2.5 equiv) and anhydrous PhCF<sub>3</sub> (1.0 mL). The reaction mixture was stirred for 12 h at 0 °C. The crude material was purified by flash column chromatography (petroleum ether) to provide the title compound as a colorless liquid in 40 % yield (23.1 mg).

<sup>1</sup>H NMR (500 MHz, CDCl<sub>3</sub>) δ 7.31 – 7.27 (m, 2H), 6.88 – 6.83 (m, 2H), 3.80 (s, 3H), 3.59 (dd, *J* = 8.1, 5.7 Hz, 1H), 1.83 – 1.65 (m, 2H), 1.08 – 0.94 (m, 12H), 0.67 – 0.56 (m, 6H);

<sup>13</sup>C NMR (126 MHz, CDCl<sub>3</sub>) δ 158.3, 134.1, 128.5, 113.8, 109.8, 84.3, 55.3, 39.6, 32.1, 11.7, 7.6, 4.7;

HRMS (ESI) calcd. for C<sub>18</sub>H<sub>28</sub>OSi [M+H]<sup>+</sup> *m/z* 289.1982, found 289.1976;

**IR** (neat,  $\text{cm}^{-1}$ ) 2954, 2873, 2167, 1510, 1245, 722;

$[\alpha]_{\text{D}}^{20} = -13.6$  ( $c = 0.88$   $\text{CHCl}_3$ ); 92% *ee*;

**HPLC analysis** CHIRALCEL two connected OD-H columns, *n*-hexane/*iso*-propanol = 100/0, flow rate 0.5 mL/min, 220 nm UV detector,  $t_{\text{R}}$  (major) = 23.6 min,  $t_{\text{R}}$  (minor) = 26.8 min.

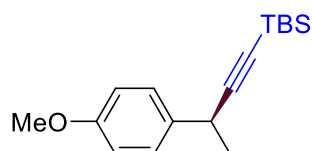

**(*S*)-tert-Butyl(3-(4-methoxyphenyl)pent-1-yn-1-yl)dimethylsilane** (Figure 4, **5f'**).

From (*E*)-1-methoxy-4-(prop-1-en-1-yl)benzene (**4e**) (29.6 mg, 0.20 mmol) and (bromoethynyl)(*tert*-butyl)dimethylsilane (**2f**) (65.8 mg, 0.30 mmol), the title compound was prepared following the general procedure **B** using  $\text{NiI}_2 \cdot x\text{H}_2\text{O}$  (3.8 mg, 5.0 mol%), (*S*)-**L\*** (3.3 mg, 6.0 mol%),  $\text{K}_3\text{PO}_4 \cdot \text{H}_2\text{O}$  (115.1 mg, 2.5 equiv), NaI (60.0 mg, 2.0 equiv),  $(\text{MeO})_3\text{SiH}$  (64  $\mu\text{L}$ , 0.5 mmol, 2.5 equiv) and anhydrous  $\text{PhCF}_3$  (1.0 mL). The reaction mixture was stirred for 12 h at 0 °C. The crude material was purified by flash column chromatography (petroleum ether) to provide the title compound as a colorless liquid in 50 % yield (28.8 mg).

**$^1\text{H}$  NMR** (500 MHz,  $\text{CDCl}_3$ )  $\delta$  7.30 – 7.25 (m, 2H), 6.91 – 6.82 (m, 2H), 3.80 (s, 3H), 3.58 (dd,  $J = 8.0, 5.8$  Hz, 1H), 1.82 – 1.62 (m, 2H), 1.01 – 0.95 (m, 12H), 0.13 (s, 6H);

**$^{13}\text{C}$  NMR** (126 MHz,  $\text{CDCl}_3$ )  $\delta$  158.3, 134.0, 128.5, 113.8, 109.2, 85.3, 55.3, 39.6, 32.0, 26.2, 16.7, 11.7, -4.2;

**HRMS** (ESI) calcd. for  $\text{C}_{18}\text{H}_{28}\text{OSi}$   $[\text{M}+\text{H}]^+$   $m/z$  289.1982, found 289.1975;

**IR** (neat,  $\text{cm}^{-1}$ ) 2928, 2856, 2168, 1510, 1245, 824;

$[\alpha]_{\text{D}}^{20} = -10.7$  ( $c = 1.12$   $\text{CHCl}_3$ ); 94% *ee*;

**HPLC analysis** CHIRALCEL two connected OD-H columns, *n*-hexane/*iso*-propanol = 100/0, flow rate 0.5 mL/min, 220 nm UV detector,  $t_{\text{R}}$  (major) = 23.1 min,  $t_{\text{R}}$  (minor) = 26.8 min.

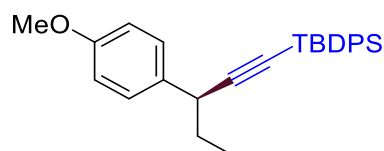

**(S)-tert-Butyl(3-(4-methoxyphenyl)pent-1-yn-1-yl)diphenylsilane** (Table 3, **5g'**). From **(E)-1-methoxy-4-(prop-1-en-1-yl)benzene** (**4e**) (29.6 mg, 0.20 mmol) and **(bromoethynyl)(tert-butyl)diphenylsilane** (**2b**) (103.0 mg, 0.30 mmol), the title compound was prepared following the general procedure **B** using  $\text{NiI}_2 \cdot x\text{H}_2\text{O}$  (3.8 mg, 5.0 mol%), **(S)-L\*** (3.3 mg, 6.0 mol%),  $\text{K}_3\text{PO}_4 \cdot \text{H}_2\text{O}$  (115.1 mg, 2.5 equiv), NaI (60.0 mg, 2.0 equiv),  $(\text{MeO})_3\text{SiH}$  (64  $\mu\text{L}$ , 0.5 mmol, 2.5 equiv) and anhydrous  $\text{PhCF}_3$  (1.0 mL). The reaction mixture was stirred for 12 h at 0 °C. The crude material was purified by flash column chromatography (petroleum ether/EtOAc = 100:1) to provide the title compound as a colorless liquid in 42% yield (34.6 mg).

$^1\text{H NMR}$  (500 MHz,  $\text{CDCl}_3$ )  $\delta$  7.85 – 7.80 (m, 4H), 7.42 – 7.34 (m, 8H), 6.93 – 6.82 (m, 2H), 3.82 (s, 3H), 3.76 (dd,  $J = 7.7, 6.1$  Hz, 1H), 1.92 – 1.78 (m, 2H), 1.12 – 0.99 (m, 12H);

$^{13}\text{C NMR}$  (126 MHz,  $\text{CDCl}_3$ )  $\delta$  158.4, 135.7, 134.0, 133.9, 133.7, 129.4, 128.6, 127.7, 113.9, 113.1, 82.3, 55.4, 39.9, 32.1, 27.2, 18.7, 11.9;

**HRMS** (ESI) calcd. for  $\text{C}_{28}\text{H}_{32}\text{OSiNa}$   $[\text{M}+\text{Na}]^+$   $m/z$  435.2115, found 435.2115;

**IR** (neat,  $\text{cm}^{-1}$ ) 2929, 2856, 2169, 1510, 1246, 698;

$[\alpha]_{\text{D}}^{18} = -12.9$  ( $c = 0.65$   $\text{CHCl}_3$ ); 96% *ee*;

**HPLC analysis** CHIRALCEL OD-H column, *n*-hexane/*iso*-propanol = 100/0, flow rate 0.8 mL/min, 220 nm UV detector,  $t_{\text{R}}$  (minor) = 26.9 min,  $t_{\text{R}}$  (major) = 28.6 min.

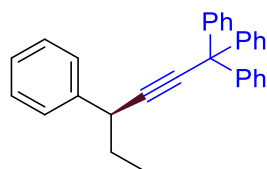

**(S)-Hex-2-yne-1,1,1,4-tetrayltetrabenzene** (Table 3, **5h'**). From **(E)-prop-1-en-1-ylbenzene** (**4h'**) (23.6 mg, 0.20 mmol) and **(3-bromoprop-2-yne-1,1,1-triyl)tribenzene** (**2c**) (104.2 mg, 0.30 mmol), the title compound was prepared

following the general procedure **B** using  $\text{NiI}_2 \cdot x\text{H}_2\text{O}$  (3.8 mg, 5.0 mol%), (*S*)-**L**\* (3.3 mg, 6.0 mol%),  $\text{K}_3\text{PO}_4 \cdot \text{H}_2\text{O}$  (115.1 mg, 2.5 equiv), NaI (60.0 mg, 2.0 equiv),  $(\text{MeO})_3\text{SiH}$  (64  $\mu\text{L}$ , 0.5 mmol, 2.5 equiv) and anhydrous  $\text{PhCF}_3$  (1.0 mL). The reaction mixture was stirred for 12 h at 0 °C. The crude material was purified by flash column chromatography (petroleum ether/EtOAc = 100:1) to provide the title compound as a colorless liquid in 50% yield (38.5 mg).

$^1\text{H NMR}$  (500 MHz,  $\text{CDCl}_3$ )  $\delta$  7.41 – 7.37 (m, 2H), 7.34 – 7.20 (m, 18H), 3.78 (dd,  $J = 7.9, 6.0$  Hz, 1H), 1.98 – 1.71 (m, 2H), 1.03 (t,  $J = 7.4$  Hz, 3H);

$^{13}\text{C NMR}$  (126 MHz,  $\text{CDCl}_3$ )  $\delta$  145.9, 142.4, 129.3, 128.4, 128.0, 127.7, 126.7, 126.6, 89.3, 86.8, 55.8, 39.8, 32.1, 12.0;

**HRMS** (ESI) calcd. for  $\text{C}_{30}\text{H}_{27}$   $[\text{M}+\text{H}]^+$   $m/z$  387.2107, found 387.2102;

**IR** (neat,  $\text{cm}^{-1}$ ) 3285, 2921, 1489, 1446, 753, 697;

$[\alpha]_{\text{D}}^{18} = -7.5$  ( $c = 1.02$   $\text{CHCl}_3$ ); 92% *ee*;

**HPLC analysis** CHIRALCEL two connected OD-H columns, *n*-hexane/*iso*-propanol = 100/0, flow rate 0.5 mL/min, 220 nm UV detector,  $t_{\text{R}}$  (minor) = 45.5 min,  $t_{\text{R}}$  (major) = 48.2 min.

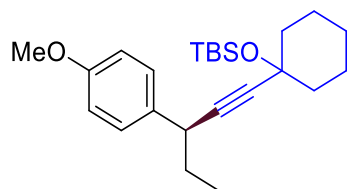

**(*S*)-tert-Butyl((1-(3-(4-methoxyphenyl)pent-1-yn-1-**

**yl)cyclohexyl)oxy)dimethylsilane** (Table 3, **5i'**). From (*E*)-1-methoxy-4-(prop-1-en-1-yl)benzene (**4e**) (29.6 mg, 0.20 mmol) and ((1-(bromoethynyl)cyclohexyl)oxy)(*tert*-butyl)dimethylsilane (**2d**) (95.2 mg, 0.30 mmol), the title compound was prepared following the general procedure **B** using  $\text{NiI}_2 \cdot x\text{H}_2\text{O}$  (3.8 mg, 5.0 mol%), (*S*)-**L**\* (3.3 mg, 6.0 mol%),  $\text{K}_3\text{PO}_4 \cdot \text{H}_2\text{O}$  (115.1 mg, 2.5 equiv), NaI (60.0 mg, 2.0 equiv),  $(\text{MeO})_3\text{SiH}$  (64  $\mu\text{L}$ , 0.5 mmol, 2.5 equiv) and anhydrous  $\text{PhCF}_3$  (1.0 mL). The reaction mixture was stirred for 12 h at 0 °C. The crude material was purified by flash column chromatography (petroleum ether/EtOAc =

100:1) to provide the title compound as a colorless liquid in 66 % yield (50.9 mg).

**<sup>1</sup>H NMR** (500 MHz, CDCl<sub>3</sub>) δ 7.28 – 7.22 (m, 2H), 6.88 – 6.79 (m, 2H), 3.80 (s, 3H), 3.55 (t, *J* = 6.9 Hz, 1H), 1.85 – 1.69 (m, 4H), 1.67 – 1.47 (m, 6H), 1.47 – 1.39 (m, 1H), 1.33 – 1.27 (m, 1H), 0.97 (t, *J* = 7.4 Hz, 3H), 0.87 (s, 9H), 0.13 (s, 3H), 0.12 (s, 3H);

**<sup>13</sup>C NMR** (126 MHz, CDCl<sub>3</sub>) δ 158.3, 134.3, 128.6, 113.7, 87.4, 86.5, 69.5, 55.4, 41.7, 41.6, 38.6, 31.6, 25.9, 25.5, 23.2, 23.1, 18.2, 11.9, –2.6, –2.7;

**HRMS** (ESI) calcd. for C<sub>24</sub>H<sub>39</sub>O<sub>2</sub>Si [M+H]<sup>+</sup> *m/z* 387.2714, found 387.2716;

**IR** (neat, cm<sup>-1</sup>) 2928, 2854, 1510, 1249, 836, 776;

[α]<sub>D</sub><sup>18</sup> = –12.8 (c = 0.72 CHCl<sub>3</sub>); 86% *ee*;

**HPLC analysis** CHIRALCEL two connected OD-H columns, *n*-hexane/*iso*-propanol = 100/0, flow rate 0.5 mL/min, 220 nm UV detector, *t*<sub>R</sub> (major) = 21.9 min, *t*<sub>R</sub> (minor) = 24.6 min.

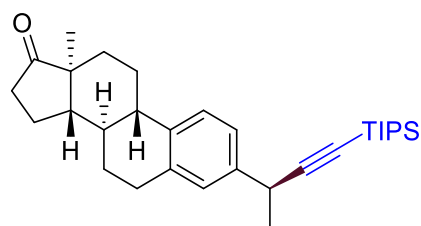

**(8*R*,9*S*,13*S*,14*S*)-13-Methyl-3-((*S*)-4-(triisopropylsilyl)but-3-yn-2-yl)-**

**6,7,8,9,11,12,13,14,15,16-decahydro-17*H*-cyclopenta[*a*]phenanthren-17-one**

(Table 3, **5j'**). From **(8*R*,9*S*,13*S*,14*S*)-13-methyl-3-vinyl-6,7,8,9,11,12,13,14,15,16-decahydro-17*H*-cyclopenta[*a*]phenanthren-17-one (**4j'**)** (56.1 mg, 0.20 mmol) and **(bromoethynyl)triisopropylsilane (**2a**)** (78.4 mg, 0.30 mmol), the title compound was prepared following the general procedure **B** using NiI<sub>2</sub>·xH<sub>2</sub>O (3.8 mg, 5.0 mol%), (*S*)-**L\*** (3.3 mg, 6.0 mol%), K<sub>3</sub>PO<sub>4</sub>·H<sub>2</sub>O (115.1 mg, 2.5 equiv), NaI (60.0 mg, 2.0 equiv), (MeO)<sub>3</sub>SiH (64 μL, 0.5 mmol, 2.5 equiv) and anhydrous PhCF<sub>3</sub> (1.0 mL). The reaction mixture was stirred for 12 h at 0 °C. The crude material was purified by flash column chromatography (petroleum ether/EtOAc = 20:1) to provide the title compound as a colorless liquid in 74% yield (68.1 mg).

**<sup>1</sup>H NMR** (500 MHz, CDCl<sub>3</sub>) δ 7.28 – 7.24 (m, 1H), 7.22 – 7.18 (m, 2H), 3.77 (q, *J* = 7.1 Hz, 1H), 2.98 – 2.86 (m, 2H), 2.51 (dd, *J* = 19.0, 8.7 Hz, 1H), 2.47 – 2.39 (m, 1H), 2.34 – 2.26 (m, 1H), 2.20 – 2.11 (m, 1H), 2.10 – 2.00 (m, 2H), 2.00 – 1.93 (m, 1H), 1.67 – 1.58 (m, 2H), 1.58 – 1.42 (m, 7H), 1.18 – 1.06 (m, 21H), 0.92 (s, 3H);

**<sup>13</sup>C NMR** (126 MHz, CDCl<sub>3</sub>) δ 221.0, 140.8, 138.0, 136.5, 127.7, 125.5, 124.4, 111.4, 82.2, 50.6, 48.1, 44.4, 38.3, 35.9, 32.5, 31.7, 29.5, 26.6, 25.8, 25.2, 21.7, 18.8, 13.9, 11.4;

**HRMS** (ESI) calcd. for C<sub>31</sub>H<sub>46</sub>OSiNa [M+Na]<sup>+</sup> *m/z* 485.3210, found 485.3207;

**IR** (neat, cm<sup>-1</sup>) 2928, 2863, 2165, 1738, 735, 675;

[α]<sub>D</sub><sup>18</sup> = +93.4 (c = 0.91 CHCl<sub>3</sub>); 97:3 *dr*;

**HPLC analysis** CHIRALCEL two connected OD-H columns, *n*-hexane/*iso*-propanol = 99.5/0.5, flow rate 0.5 mL/min, 220 nm UV detector, *t*<sub>R</sub> (minor) = 27.6 min, *t*<sub>R</sub> (major) = 29.1 min.

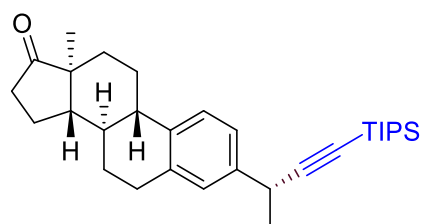

**(8*R*,9*S*,13*S*,14*S*)-13-Methyl-3-((*R*)-4-(triisopropylsilyl)but-3-yn-2-yl)-**

**6,7,8,9,11,12,13,14,15,16-decahydro-17*H*-cyclopenta[*a*]phenanthren-17-one**

(Table 3, **5k'**). From **(8*R*,9*S*,13*S*,14*S*)-13-methyl-3-vinyl-6,7,8,9,11,12,13,14,15,16-decahydro-17*H*-cyclopenta[*a*]phenanthren-17-one (**4j'**)** (56.1 mg, 0.20 mmol) and **(bromoethynyl)triisopropylsilane (**2a**)** (78.4 mg, 0.30 mmol), the title compound was prepared following the general procedure **B** using NiI<sub>2</sub>·xH<sub>2</sub>O (3.8 mg, 5.0 mol%), (*R*)-**L\*** (3.3 mg, 6.0 mol%), K<sub>3</sub>PO<sub>4</sub>·H<sub>2</sub>O (115.1 mg, 2.5 equiv), NaI (60.0 mg, 2.0 equiv), (MeO)<sub>3</sub>SiH (64 μL, 0.5 mmol, 2.5 equiv) and anhydrous PhCF<sub>3</sub> (1.0 mL). The reaction mixture was stirred for 12 h at 0 °C. The crude material was purified by flash column chromatography (petroleum ether/EtOAc = 20:1) to provide the title compound as a colorless liquid in 81% yield (74.8 mg).

**<sup>1</sup>H NMR** (500 MHz, CDCl<sub>3</sub>) δ 7.28 – 7.25 (m, 1H), 7.22 – 7.18 (m, 2H), 3.77 (q, *J* = 7.1 Hz, 1H), 2.92 (dd, *J* = 9.1, 4.2 Hz, 2H), 2.51 (dd, *J* = 19.0, 8.7 Hz, 1H), 2.47 – 2.40 (m, 1H), 2.34 – 2.26 (m, 1H), 2.20 – 2.11 (m, 1H), 2.11 – 2.00 (m, 2H), 2.00 – 1.94 (m, 1H), 1.67 – 1.58 (m, 2H), 1.58 – 1.41 (m, 7H), 1.15 – 0.99 (m, 21H), 0.92 (s, 3H);

**<sup>13</sup>C NMR** (126 MHz, CDCl<sub>3</sub>) δ 221.0, 140.8, 137.9, 136.5, 127.7, 125.5, 124.4, 111.5, 82.2, 50.6, 48.1, 44.4, 38.2, 35.9, 32.5, 31.7, 29.5, 26.6, 25.8, 25.2, 21.7, 18.8, 13.9, 11.4;

**HRMS** (ESI) calcd. for C<sub>31</sub>H<sub>46</sub>OSiNa [M+Na]<sup>+</sup> *m/z* 485.3210, found 485.3205;

**IR** (neat, cm<sup>-1</sup>) 2926, 2863, 2165, 1740, 1009, 670;

**[α]<sub>D</sub><sup>18</sup>** = +89.5 (c = 1.20 CHCl<sub>3</sub>); 5:95 *dr*;

**HPLC analysis** CHIRALCEL two connected OD-H columns, *n*-hexane/*iso*-propanol = 99.5/0.5, flow rate 0.5 mL/min, 220 nm UV detector, *t<sub>R</sub>* (major) = 27.6 min, *t<sub>R</sub>* (minor) = 29.2 min.

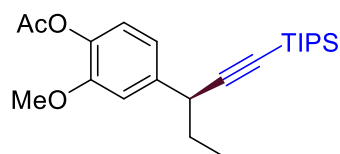

**(*S*)-2-Methoxy-4-(1-(triisopropylsilyl)pent-1-yn-3-yl)phenyl acetate** (Figure 5a, (*S*)-**3i**). From **4-allyl-2-methoxyphenyl acetate** (**1i**) (41.2 mg, 0.20 mmol) and **(bromoethynyl)triisopropylsilane** (**2a**) (78.4 mg, 0.30 mmol), the title compound was prepared following the general procedure **B** using NiI<sub>2</sub>·xH<sub>2</sub>O (3.8 mg, 5.0 mol%), (*S*)-**L\*** (3.3 mg, 6.0 mol%), K<sub>3</sub>PO<sub>4</sub>·H<sub>2</sub>O (115.1 mg, 2.5 equiv), NaI (60.0 mg, 2.0 equiv), (MeO)<sub>3</sub>SiH (64 μL, 0.5 mmol, 2.5 equiv) and anhydrous PhCF<sub>3</sub> (1.0 mL). The reaction mixture was stirred for 12 h at 0 °C. The crude material was purified by flash column chromatography (petroleum ether) to provide the title compound as a colorless liquid in 78 % yield (60.5 mg).

**<sup>1</sup>H NMR** (500 MHz, CDCl<sub>3</sub>) δ 7.10 (d, *J* = 1.9 Hz, 1H), 6.96 (d, *J* = 8.1 Hz, 1H), 6.89 (dd, *J* = 8.2, 1.9 Hz, 1H), 3.82 (s, 3H), 3.65 (dd, *J* = 8.5, 5.3 Hz, 1H), 2.31 (s, 3H), 1.87 – 1.77 (m, 1H), 1.76 – 1.66 (m, 1H), 1.11 – 1.06 (m, 21H), 1.04 (t, *J* = 7.4 Hz, 3H);



**<sup>13</sup>C NMR** (126 MHz, CDCl<sub>3</sub>) δ 169.3, 150.8, 141.0, 138.2, 122.4, 119.8, 111.8, 109.6, 83.8, 55.9, 40.4, 32.2, 20.8, 18.8, 11.8, 11.4;

**HRMS** (ESI) calcd. for C<sub>23</sub>H<sub>36</sub>O<sub>3</sub>Si [M+Na]<sup>+</sup> m/z 411.2326, found 411.2319;

**IR** (neat, cm<sup>-1</sup>) 2940, 2864, 2167, 1766, 1508, 1195;

**[α]<sub>D</sub><sup>20</sup>** = -20.5 (c = 0.85 CHCl<sub>3</sub>); 90% *ee*;

**HPLC analysis** CHIRALCEL two connected OD-H columns, *n*-hexane/*iso*-propanol = 99/1, flow rate 0.5 mL/min, 220 nm UV detector, *t*<sub>R</sub> (minor) = 17.7 min, *t*<sub>R</sub> (major) = 20.6 min.

## Gram-Scale Experiment

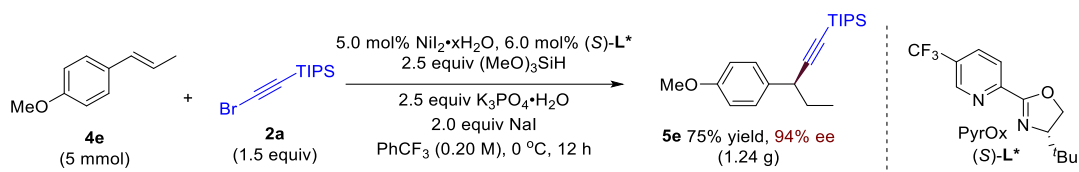

In a nitrogen-filled glove box, to an oven-dried 50 mL round bottom flask equipped with a magnetic stir bar were added  $\text{NiI}_2 \cdot x\text{H}_2\text{O}$  (95.0 mg, 5.0 mol%),  $(S)\text{-L}^*$  (82.5 mg, 6.0 mol%),  $\text{K}_3\text{PO}_4 \cdot \text{H}_2\text{O}$  (2.88 g, 2.5 equiv),  $\text{NaI}$  (1.50 g, 2.0 equiv) and anhydrous  $\text{PhCF}_3$  (25.0 mL, 0.20M). The mixture was stirred for 20 min at room temperature before the addition of  $(\text{MeO})_3\text{SiH}$  (1.60 mL, 12.5 mmol, 2.5 equiv). Stirring was continued for an additional 5 min at room temperature before  $(E)$ -1-methoxy-4-(prop-1-en-1-yl)benzene **4e** (5.0 mmol, 1.0 equiv) and (bromoethynyl)triisopropylsilane **2a** (7.5 mmol, 1.5 equiv) were added to the resulting mixture in this order. The flask was sealed with a rubber stopper, removed from the glove box and equipped with a  $\text{N}_2$  balloon, and stirred at  $0^\circ\text{C}$  for up to 12 h (the mixture was stirred at 800 rpm). After the reaction was complete, the reaction was quenched upon the addition of  $\text{H}_2\text{O}$ , and the mixture was extracted with  $\text{EtOAc}$ . The organic layer was concentrated. The crude material was purified by flash column chromatography (petroleum ether) to provide **5e** as a colorless liquid in 75% yield (1.24 g). The ee (94%) was determined via HPLC analysis (General procedure **B**).

## Synthetic Transformations

### Removing the TIPS Group in **5e**

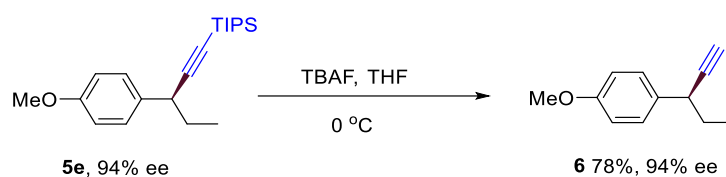

A 10-mL Schlenk tube was charged with the product **5e** (66.0 mg, 0.2 mmol) and THF (2 mL), and filled with nitrogen. To the solution cooled to 0 °C was added a solution of tetrabutylammonium fluoride (1.0 mol/L solution in THF; 2.0 mL, 2.0 mmol) dropwise via syringe over 2 min. After 4 h, the reaction was quenched with water (2 mL). The layers were separated, and the aqueous layer was extracted with diethyl ether (3 x 20 mL). The combined organic layers were washed with brine (50 mL), dried over Na<sub>2</sub>SO<sub>4</sub>, filtered, and concentrated. Then the mixture was purified by silica gel column chromatography (eluted with petroleum ether) to afford the desilylation product **6** as colorless oil (27.2 mg, 78% yield, 94% ee).

<sup>1</sup>H NMR (500 MHz, CDCl<sub>3</sub>) δ 7.36 – 7.09 (m, 2H), 7.00 – 6.71 (m, 2H), 3.80 (s, 3H), 3.59 – 3.39 (m, 1H), 2.27 (d, *J* = 2.5 Hz, 1H), 1.83 – 1.72 (m, 2H), 0.99 (t, *J* = 7.4 Hz, 3H);

<sup>13</sup>C NMR (126 MHz, CDCl<sub>3</sub>) δ 158.5, 133.6, 128.5, 113.9, 86.3, 70.8, 55.4, 38.4, 31.5, 11.7;

HRMS (ESI) calcd. for C<sub>12</sub>H<sub>14</sub>ONa [M+Na]<sup>+</sup> *m/z* 197.0937, found 197.0934;

IR (neat, cm<sup>-1</sup>) 3292, 2940, 1509, 1243, 1034, 632;

[α]<sub>D</sub><sup>18</sup> = -21.0 (c = 0.59 CHCl<sub>3</sub>); 94% *ee*;

HPLC analysis CHIRALCEL OD-H column, *n*-hexane/*iso*-propanol = 100/0, flow rate 0.5 mL/min, 220 nm UV detector, *t*<sub>R</sub> (major) = 44.2 min, *t*<sub>R</sub> (minor) = 51.9 min.

## Click Reaction

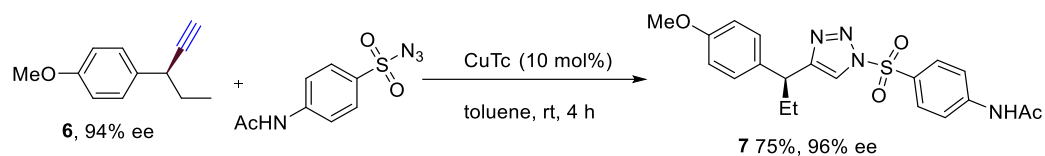

To a solution of CuTc (3.8 mg, 0.02 mmol) and **6** (34.8 mg, 0.2 mmol) in toluene (2 mL), 4-acetamidobenzenesulfonyl azide (48.0 mg, 0.2 mmol) was added, and the mixture was stirred at room temperature for 4 h. After the reaction was completed, the organic solvent was removed under vacuum, and the residue was purified by column chromatography (DCM/EtOAc = 5:1) to give the product **7** (62.1 mg, 75% yield, 96% ee) as a white solid.

**<sup>1</sup>H NMR** (500 MHz, DMSO-*d*<sub>6</sub>) δ 10.57 (s, 1H), 8.65 (s, 1H), 8.05 (d, *J* = 9.0 Hz, 2H), 7.86 (d, *J* = 9.0 Hz, 2H), 7.17 (d, *J* = 8.8 Hz, 2H), 6.84 (d, *J* = 8.7 Hz, 2H), 3.92 (t, *J* = 7.8 Hz, 1H), 3.70 (s, 3H), 2.09 (s, 3H), 2.07 – 1.99 (m, 1H), 1.93 – 1.83 (m, 1H), 0.74 (t, *J* = 7.3 Hz, 3H);

**<sup>13</sup>C NMR** (126 MHz, DMSO-*d*<sub>6</sub>) δ 169.5, 157.8, 151.5, 146.0, 134.5, 129.9, 128.6, 127.8, 121.5, 119.1, 113.8, 54.9, 42.9, 28.2, 24.2, 12.1;

**HRMS** (ESI) calcd. for C<sub>20</sub>H<sub>22</sub>N<sub>4</sub>O<sub>4</sub>SNa [M+Na]<sup>+</sup> *m/z* 437.1254, found 437.1256;

**IR** (neat, cm<sup>-1</sup>) 3330, 3107, 2961, 1394, 1176, 577;

**m.p.** 135.6 – 136.7 °C;

**[α]<sub>D</sub><sup>18</sup>** = +21.8 (c = 0.57 Acetone); 96% *ee*;

**HPLC analysis** CHIRALPAK IC column, *n*-hexane/*iso*-propanol = 80/20, flow rate 0.8 mL/min, 254 nm UV detector, *t*<sub>R</sub> (major) = 24.7 min, *t*<sub>R</sub> (minor) = 30.3 min.

## Conversion of the Terminal Alkyne into Aldehyde

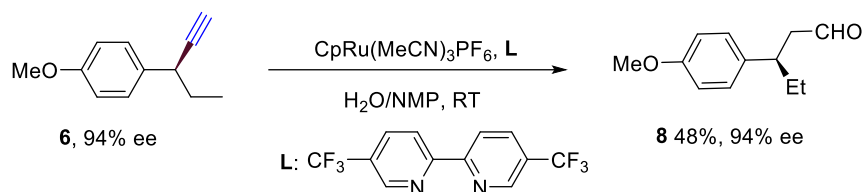

To a Schlenk tube containing  $[\text{CpRu}(\text{MeCN})_3]\text{PF}_6$  (1.7 mg, 0.0040 mmol, 2.0 mol%) and 5,5'-bis(trifluoromethyl)-2,2'-bipyridine **L** (1.2 mg, 0.0040 mmol, 2.0 mol%) was added **6** (0.20 mmol) in a mixture of NMP (0.8 mL) and water (0.2 mL) under nitrogen atmosphere and the reaction mixture was stirred at 25 °C overnight. After completion of reaction (monitored by TLC), the reaction mixture was diluted by EtOAc, washed by brine, dried over  $\text{Na}_2\text{SO}_4$ , filtered, and concentrated under reduced pressure. The residue was purified by column chromatography on silica gel (petroleum ether/EtOAc = 20/1) to afford **8** as a colorless oil (18.4 mg, 48%, 94% ee).

$^1\text{H NMR}$  (500 MHz,  $\text{CDCl}_3$ )  $\delta$  9.65 (t,  $J = 2.2$  Hz, 1H), 7.12 – 7.07 (m, 2H), 6.87 – 6.81 (m, 2H), 3.79 (s, 3H), 3.08 – 2.99 (m, 1H), 2.72 – 2.63 (m, 2H), 1.73 – 1.64 (m, 1H), 1.64 – 1.52 (m, 1H), 0.80 (t,  $J = 7.4$  Hz, 3H);

$^{13}\text{C NMR}$  (126 MHz,  $\text{CDCl}_3$ )  $\delta$  202.4, 158.3, 135.7, 128.5, 114.0, 55.3, 50.5, 41.1, 29.8, 12.0;

**HRMS** (ESI) calcd. for  $\text{C}_{12}\text{H}_{17}\text{O}_2$   $[\text{M}+\text{H}]^+$   $m/z$  193.1223, found 193.1224;

**IR** (neat,  $\text{cm}^{-1}$ ) 2960, 2927, 1708, 1512, 1249, 829;

$[\alpha]_{\text{D}}^{18} = -14.8$  ( $c = 0.31$   $\text{CHCl}_3$ ); 94% ee;

**HPLC analysis** CHIRALPAK IC column, *n*-hexane/*iso*-propanol = 99/1, flow rate 0.5 mL/min, 220 nm UV detector,  $t_{\text{R}}$  (minor) = 26.1 min,  $t_{\text{R}}$  (major) = 27.6 min.

## Semi-Reduction of the Triple Bond by DIBAL-H

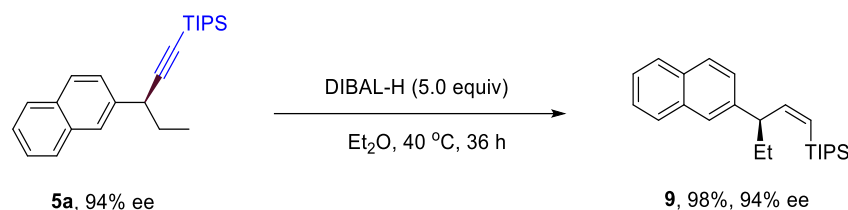

To a solution of **5a** (70.0 mg, 0.2 mmol) in Et<sub>2</sub>O (2 mL), DIBAL-H (1.0 mL, 1.0 M solution in hexanes) was added, then the mixture was stirred at 40 °C for 36 h. After the reaction was completed, aqueous solution of NaOH was added to quench extra DIABL-H, and the solution was extracted by Et<sub>2</sub>O. The combined organic layer was dried over MgSO<sub>4</sub>, and filtered. After the removal of the solvent, the residue was purified by column chromatography (petroleum ether) to give product **9** (69.0 mg, 98% yield, 94% ee) as colorless oil.

**<sup>1</sup>H NMR** (500 MHz, CDCl<sub>3</sub>) δ 7.85 – 7.78 (m, 3H), 7.67 – 7.63 (m, 1H), 7.52 – 7.38 (m, 3H), 6.84 (dd, *J* = 14.4, 10.7 Hz, 1H), 5.50 (d, *J* = 14.4 Hz, 1H), 3.60 – 3.32 (m, 1H), 1.91 – 1.76 (m, 2H), 1.28 – 1.17 (m, 3H), 1.12 (d, *J* = 7.4 Hz, 9H), 1.04 (d, *J* = 7.4 Hz, 9H), 0.86 (t, *J* = 7.4 Hz, 3H);

**<sup>13</sup>C NMR** (126 MHz, CDCl<sub>3</sub>) δ 152.9, 142.2, 133.7, 132.2, 128.0, 127.8, 127.7, 126.2, 126.1, 125.9, 125.2, 123.2, 51.8, 31.1, 19.1, 19.0, 12.5, 11.9;

**HRMS** (ESI) calcd. for C<sub>24</sub>H<sub>36</sub>SiNa [M+Na]<sup>+</sup> *m/z* 375.2478, found 375.2480;

**IR** (neat, cm<sup>-1</sup>) 2939, 2863, 1460, 743, 664, 474;

**[α]<sub>D</sub><sup>18</sup>** = -147.1 (*c* = 1.07 CHCl<sub>3</sub>); 94% *ee*;

**HPLC analysis** CHIRALCEL two connected OD-H columns, *n*-hexane/*iso*-propanol = 100/0, flow rate 0.5 mL/min, 220 nm UV detector, *t<sub>R</sub>* (major) = 23.5 min, *t<sub>R</sub>* (minor) = 26.8 min.

## Oxidative Cleavage of the Triple Bond to Carboxylic Acid

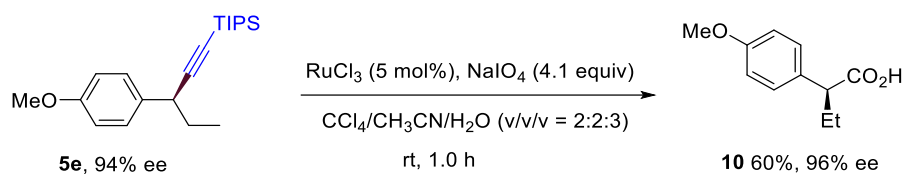

To a solution of **5e** (66.0 mg, 0.2 mmol) in a mixed solvent of CCl<sub>4</sub>, CH<sub>3</sub>CN and H<sub>2</sub>O (1.7 mL, v/v/v 2:2:3), RuCl<sub>3</sub> (2.0 mg, 5 mol%) and sodium periodate (175.4 mg, 4.1 equiv) were added, then the mixture was stirred vigorously at room temperature for 1 h. After reaction completion, the mixture was extracted with dichloromethane (3 x 5 mL). The combined organic phase was dried over Na<sub>2</sub>SO<sub>4</sub>. The organic solvent was removed under vacuum, and the residue was purified via a preparative plate (petroleum ether /EtOAc ) to give acid **10** (23.2 mg, 60%, 96% ee) as a colorless oil.

**<sup>1</sup>H NMR** (500 MHz, CDCl<sub>3</sub>) δ 7.25 – 7.21 (m, 2H), 6.87 – 6.84 (m, 2H), 3.79 (s, 3H), 3.41 (t, *J* = 7.7 Hz, 1H), 2.17 – 2.00 (m, 1H), 1.85 – 1.69 (m, 1H), 0.90 (t, *J* = 7.4 Hz, 3H);

**<sup>13</sup>C NMR** (126 MHz, CDCl<sub>3</sub>) δ 179.7, 159.0, 130.6, 129.2, 114.1, 55.4, 52.4, 26.4, 12.2;

**HRMS** (ESI) calcd. for C<sub>11</sub>H<sub>14</sub>O<sub>3</sub>Na [M+Na]<sup>+</sup> *m/z* 217.0835, found 217.0834;

**IR** (neat, cm<sup>-1</sup>) 2964, 2930, 1703, 1511, 1250, 1178;

[α]<sub>D</sub><sup>18</sup> = +50.0 (c = 0.14 CHCl<sub>3</sub>); 96% ee;

**HPLC analysis** CHIRALPAK AD-H column, *n*-hexane/*iso*-propanol/TFA = 90/10/0.1, flow rate 0.5 mL/min, 220 nm UV detector, *t*<sub>R</sub> (minor) = 17.5 min, *t*<sub>R</sub> (major) = 20.3 min.

## Conditions Optimization

**Supplementary Table 1.** The conditions optimization for enantioselective NiH-catalyzed reductive hydroalkynylation.

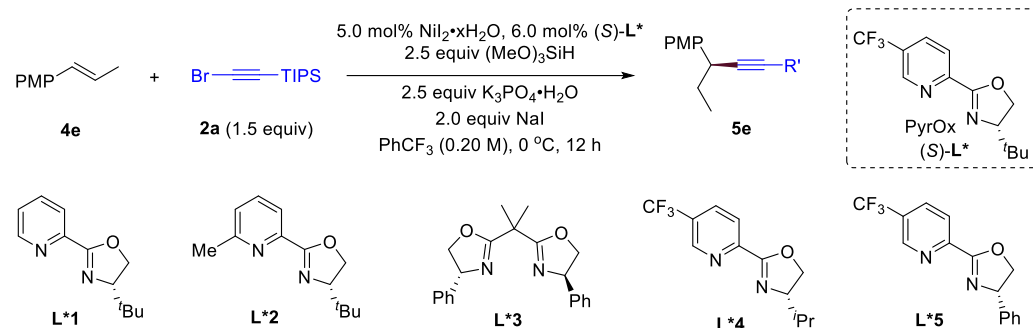

| Entry | Variation from the standard conditions                                                              | Yield (%) <sup>a</sup> | ee (%) <sup>b</sup> |
|-------|-----------------------------------------------------------------------------------------------------|------------------------|---------------------|
| 1     | None                                                                                                | 86                     | 94                  |
| 2     | w/o NiI <sub>2</sub> ·xH <sub>2</sub> O                                                             | NR                     |                     |
| 3     | w/o K <sub>3</sub> PO <sub>4</sub> ·H <sub>2</sub> O                                                | NR                     |                     |
| 4     | w/o NaI                                                                                             | 29                     | 94                  |
| 5     | L*1 instead of L*                                                                                   | 44                     | 82                  |
| 6     | L*2 instead of L*                                                                                   | 73                     | 10                  |
| 7     | L*3 instead of L*                                                                                   | 40                     | 62                  |
| 8     | L*4 instead of L*                                                                                   | 12                     | 88                  |
| 9     | L*5 instead of L*                                                                                   | 16                     | 86                  |
| 10    | PMHS instead of (MeO) <sub>3</sub> SiH                                                              | <5                     | nd                  |
| 11    | DMMS instead of (MeO) <sub>3</sub> SiH                                                              | 42                     | 94                  |
| 12    | DME instead of PhCF <sub>3</sub>                                                                    | 13                     | 84                  |
| 13    | DCE instead of PhCF <sub>3</sub>                                                                    | 82                     | 92                  |
| 14    | Ni(NO <sub>3</sub> ) <sub>2</sub> ·6H <sub>2</sub> O instead of NiI <sub>2</sub> ·xH <sub>2</sub> O | 79                     | 94                  |
| 15    | NiI <sub>2</sub> instead of NiI <sub>2</sub> ·xH <sub>2</sub> O                                     | <5                     | nd                  |
| 16    | Na <sub>2</sub> CO <sub>3</sub> instead of K <sub>3</sub> PO <sub>4</sub> ·H <sub>2</sub> O         | 6                      | 92                  |
| 17    | MeOLi instead of K <sub>3</sub> PO <sub>4</sub> ·H <sub>2</sub> O                                   | <5                     | nd                  |
| 18    | KI instead of NaI                                                                                   | 70                     | 94                  |
| 19    | TBAI instead of NaI                                                                                 | 41                     | 94                  |
| 20    | 25 °C                                                                                               | 57                     | 90                  |

<sup>a</sup>Yield were determined by GC using dodecane as internal standard; <sup>b</sup>The enantiomeric excesses (ee) were determined by chiral HPLC analysis.



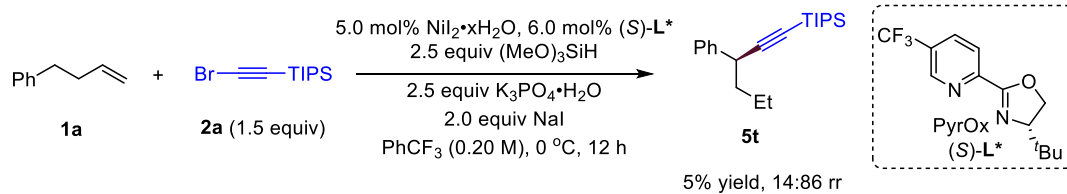

### Unsuccessful Substrates

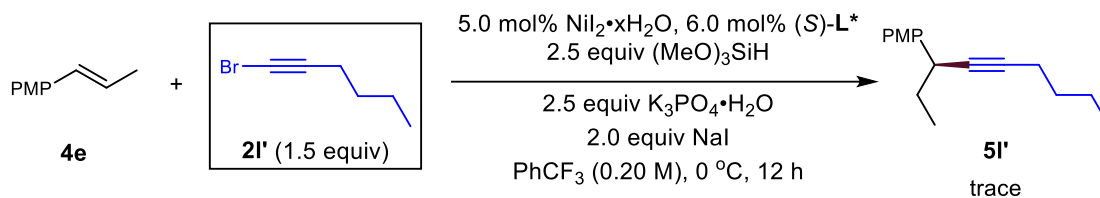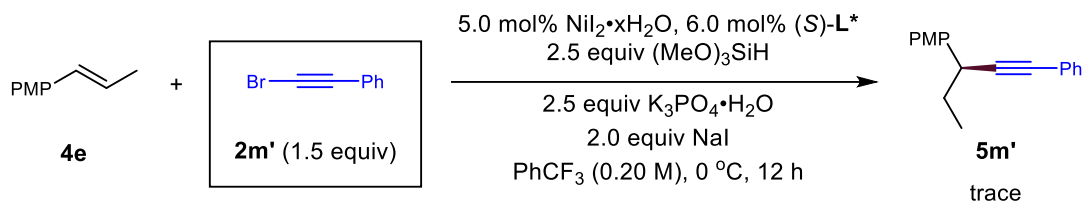

## Preparation of Substrates

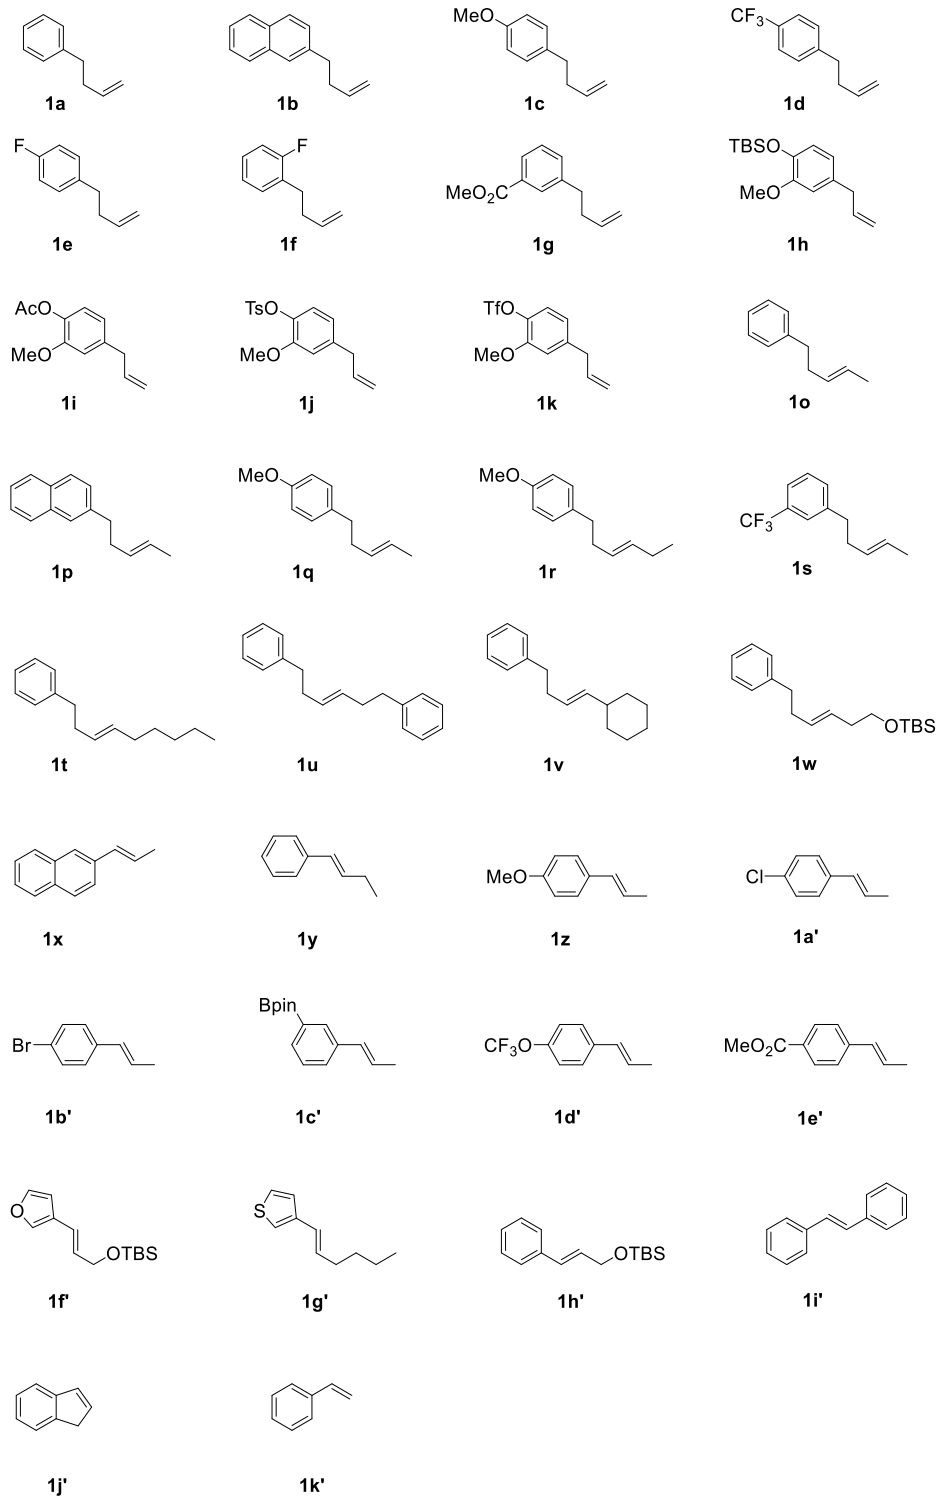

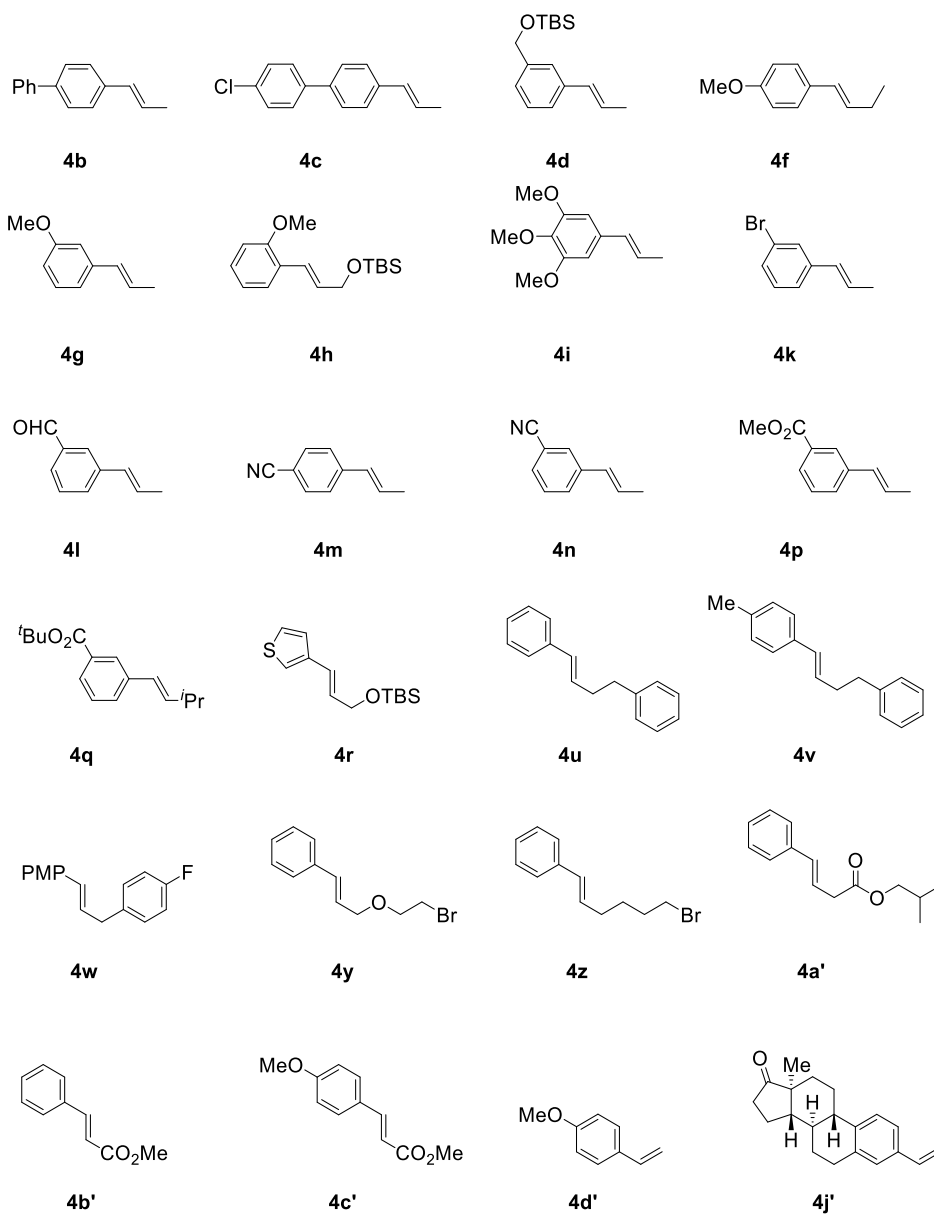

Compounds **1a**, **1z**, **1i'**, **1j'**, **1k'**, **4b'**, and **4d'** are commercially available. Compounds **1b**<sup>[7]</sup>, **1c**<sup>[8]</sup>, **1d**<sup>[8]</sup>, **1e**<sup>[8]</sup>, **1f**<sup>[9]</sup>, **1n**<sup>[9]</sup>, **1g**<sup>[10]</sup>, **1j**<sup>[10]</sup>, **1u**<sup>[10]</sup>, **4u**<sup>[10]</sup>, **4a'**<sup>[10]</sup>, **1h**<sup>[11]</sup>, **1i**<sup>[12]</sup>, **1k**<sup>[13]</sup>, **1p**<sup>[14]</sup>, **1q**<sup>[14]</sup>, **1r**<sup>[15]</sup>, **1s**<sup>[16]</sup>, **4j'**<sup>[16]</sup>, **1t**<sup>[17]</sup>, **1v**<sup>[17]</sup>, **1w**<sup>[18]</sup>, **1x**<sup>[19]</sup>, **1a'**<sup>[19]</sup>, **1b'**<sup>[19]</sup>, **4b**<sup>[19]</sup>, **4f**<sup>[19]</sup>, **4g**<sup>[19]</sup>, **4i**<sup>[19]</sup>, **1y**<sup>[20]</sup>, **1c'**<sup>[20]</sup>, **1e'**<sup>[20]</sup>, **1g'**<sup>[20]</sup>, **4d**<sup>[20]</sup>, **4m**<sup>[20]</sup>, **1h'**<sup>[21]</sup>, **4k**<sup>[22]</sup>, **4l**<sup>[23]</sup>, **4p**<sup>[24]</sup>, **4w**<sup>[25]</sup>, **4y**<sup>[26]</sup>, **4z**<sup>[27]</sup>, **4v**<sup>[28]</sup>, **4c'**<sup>[29]</sup>, and **4n**<sup>[30]</sup> were prepared according to the previously reported procedures.

### General procedure (C) for the synthesis of olefins 1d', 4c, and 4q

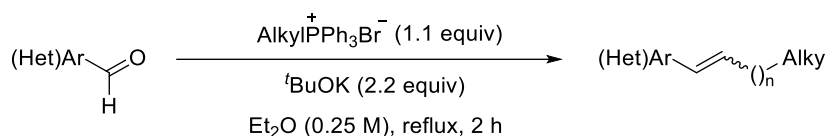

A flame dried 250 round bottom flask was charged with alkyl triphenyl phosphonium bromide (1.1 equiv), KO<sup>t</sup>Bu (2.2 equiv, *Note: hydroscopic, stored under nitrogen. Exposure to air should be less than 5 minutes*), a stir bar, and anhydrous diethyl ether (0.25 M). A reflux condense was attached and the reaction mixture was heated to reflux for over 1 h before adding a solution of aldehyde (1.0 equiv) in anhydrous diethyl ether. The reaction was monitored by TLC and upon completion of the reaction (~ 2 h), the solvent was removed in vacuo. The resulting compound was diluted with hexanes, filtered over a thick plug of silica gel and concentrated again. The reaction was purified via column chromatography to get the desired compound.

#### Characterization of Substrates:

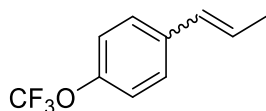

#### 1-(Prop-1-en-1-yl)-4-(trifluoromethoxy)benzene (1d'):

**Yield** 78% (1.57 g, ~ 1:1.8 *E/Z*), colorless liquid;

**<sup>1</sup>H NMR** (500 MHz, CDCl<sub>3</sub>) δ 7.35 – 7.28 (m, 2H), 7.21 – 7.12 (m, 2H), 6.45 – 6.35 (m, 1H), [6.28 – 6.17 (m, 0.35H) & 5.88 – 5.79 (m, 0.65H), *due to Z/E*], 1.94 – 1.80 (m, 3H);

**<sup>13</sup>C NMR** (126 MHz, CDCl<sub>3</sub>) δ (147.9 & 147.5, *due to Z/E*), (136.7, 136.3 & *due to Z/E*), (130.0 & 129.6, *due to Z/E*), (128.5 & 127.6, *due to Z/E*), (126.9 & 126.8, *due to Z/E*), (121.0 & 120.6, *due to Z/E*), 120.5 (q, *J* = 257.4), (18.4 & 14.4, *due to Z/E*);

**<sup>19</sup>F NMR** (471 MHz, CDCl<sub>3</sub>) δ -57.8;

**HRMS** (ESI) calcd. for C<sub>10</sub>H<sub>10</sub>F<sub>3</sub>O [M+H]<sup>+</sup> *m/z* 203.0678, found 203.0676;

**IR** (neat, cm<sup>-1</sup>) 2921, 1507, 1253, 1155, 814, 526.

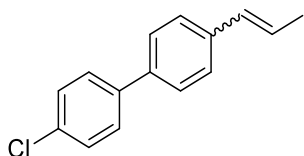

**4-Chloro-4'-(prop-1-en-1-yl)-1,1'-biphenyl (4c):**

**Yield** 65% (~ 1:3 *E/Z*), white solid;

**<sup>1</sup>H NMR** (500 MHz, CDCl<sub>3</sub>) δ 7.58 – 7.48 (m, 4H), 7.44 – 7.36 (m, 4H), 6.52 – 6.41 (m, 1H), [6.36 – 6.26 (m, 0.24H) & 5.92 – 5.80 (m, 0.76H), *due to Z/E*], [1.97 (dd, *J* = 7.2, 1.8 Hz, 2.32H) & 1.93 (dd, *J* = 6.6, 1.7 Hz, 0.75H), *due to Z/E*];

**<sup>13</sup>C NMR** (126 MHz, CDCl<sub>3</sub>) δ 139.41, (138.2 & 137.9, *due to Z/E*), (137.4 & 137.1, *due to Z/E*), (133.4 & 133.3, *due to Z/E*), 130.58, (129.5 & 129.42, *due to Z/E*), (129.1 & 129.0, *due to Z/E*), (128.3 & 128.2, *due to Z/E*), (127.4 & 127.1, *due to Z/E*), (126.7 & 126.4, *due to Z/E*), (18.72 & 14.92, *due to Z/E*);

**HRMS** (ESI) calcd. for C<sub>15</sub>H<sub>13</sub>ClNa [M+Na]<sup>+</sup> *m/z* 251.0598, found 251.0598;

**IR** (neat, cm<sup>-1</sup>) 2913, 1473, 1093, 821, 787, 504;

**m.p.** 93.3 – 94.4 °C.

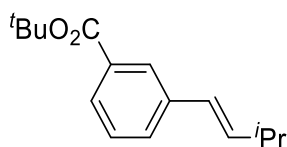

**tert-Butyl (*E*)-3-(3-methylbut-1-en-1-yl)benzoate (4q):**

**Yield** 60% (> 95:5 *Z/E*), colorless liquid;

**<sup>1</sup>H NMR** (500 MHz, CHCl<sub>3</sub>) δ 7.94 – 7.89 (m, 1H), 7.88 – 7.82 (m, 1H), 7.44 – 7.33 (m, 2H), 6.32 (d, *J* = 11.6 Hz, 1H), 5.53 (dd, *J* = 11.6, 10.2 Hz, 1H), 2.94 – 2.80 (m, 1H), 1.60 (s, 9H), 1.07 (s, 3H), 1.06 (s, 3H);

**<sup>13</sup>C NMR** (126 MHz, CDCl<sub>3</sub>) δ 165.8, 141.3, 137.9, 132.6, 132.0, 129.7, 128.1, 127.5, 125.7, 81.0, 28.3, 27.3, 23.2;

**HRMS** (ESI) calcd. for C<sub>16</sub>H<sub>22</sub>O<sub>2</sub>Na [M+Na]<sup>+</sup> *m/z* 269.1512, found 269.1513;

**IR** (neat, cm<sup>-1</sup>) 2963, 1713, 1367, 1293, 1156, 773.

### General procedure (D) for the preparation of olefins 1f', 4h and 4r<sup>[3,4]</sup>

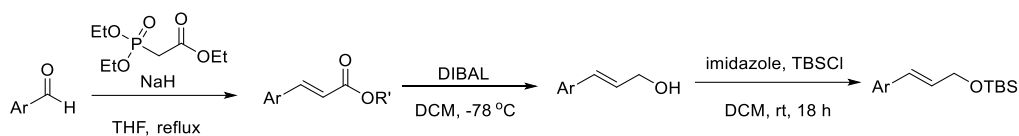

#### Step 1:

Phosphonoacetate (1.2 equiv) was added dropwise under argon over a period of 5 minutes to a stirred suspension of sodium hydride (55% dispersion in oil, 1.2 equiv) in dry THF (1.3 mL per 1.2 mmol of sodium hydride), and the resulting mixture was stirred at 0 °C for additional 15 min. A solution of aldehyde (1.0 equiv) in dry THF (1.0 M) was slowly added to the resulting mixture, and it was stirred at 0 °C for additional 0.5 h. Subsequently, the reaction mixture was refluxed overnight and then cooled to ambient temperature, and the reaction was quenched with saturated aqueous NH<sub>4</sub>Cl. The aqueous layer was extracted with EtOAc (30 mL × 3). The combined organic layers were washed with brine, dried over Na<sub>2</sub>SO<sub>4</sub>, and concentrated in vacuo. The crude product was used without further purification.

#### Step 2:

To a stirred solution of ethyl acrylates (1.0 equiv) in anhydrous CH<sub>2</sub>Cl<sub>2</sub> (0.71 M) was added dropwise diisobutylaluminum hydride (1.0 M in toluene, 2.2 equiv) under argon at -78 °C. The mixture was stirred at -78 °C for 1.5 h, and the reaction was quenched with 10% aqueous NaOH (1.0 mL per 1.0 mL of diisobutylaluminum hydride solution). The resulting mixture was allowed to warm to ambient temperature and stirred for additional 1 h. The aqueous layer was extracted with CH<sub>2</sub>Cl<sub>2</sub> (30 mL × 3), and the combined organic layers were washed with brine, dried over Na<sub>2</sub>SO<sub>4</sub>, and concentrated in vacuo. Purification by flash silica gel column chromatography using petroleum ether/EtOAc (v/v = 5:1–3:1) as an eluent gave the corresponding allylic alcohols.

#### Step 3:

In a flame-dried 25 mL round bottom flask was added allylic alcohols (1 equiv) in dry CH<sub>2</sub>Cl<sub>2</sub> (0.3 M). Then imidazole (1.5 equiv) and trialkylsilyl chloride (1.3 equiv) were added. The reaction was stirred at room temperature for 18 h. The reaction was

quenched with water. The reaction was extracted with ether (2 x 15 mL). Organic layers were combined, washed with brine (20 mL), dried over magnesium sulfate, filtered and concentrated in vacuum to provide a crude oil which was purified by flash chromatography to provide the desired product.

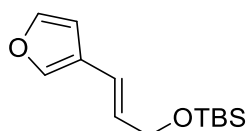

***tert*-Butyl((3-(furan-3-yl)allyl)oxy)dimethylsilane (1f')**:

**Yield** 90% (> 95:5 *E/Z*), colorless liquid;

**<sup>1</sup>H NMR** (500 MHz, CDCl<sub>3</sub>) δ 7.45 – 7.33 (m, 2H), 6.54 – 6.51 (m, 1H), 6.48 – 6.42 (m, 1H), 6.08 – 5.95 (m, 1H), 4.30 (dd, *J* = 5.2, 1.8 Hz, 2H), 0.95 (s, 9H), 0.11 (s, 6H);

**<sup>13</sup>C NMR** (126 MHz, CDCl<sub>3</sub>) δ 143.5, 140.3, 128.8, 124.0, 119.4, 107.7, 63.8, 26.1, 18.5, -5.0;

**HRMS** (ESI) calcd. for C<sub>13</sub>H<sub>22</sub>O<sub>2</sub>SiNa [M+Na]<sup>+</sup> *m/z* 261.1281, found 261.1282;

**IR** (neat, cm<sup>-1</sup>) 2956, 2856, 1254, 1071, 836, 776.

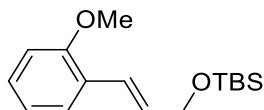

***tert*-Butyl((3-(2-methoxyphenyl)allyl)oxy)dimethylsilane (4h)**:

**Yield** 80% (~ 5:1 *E/Z*), colorless liquid;

**<sup>1</sup>H NMR** (500 MHz, CDCl<sub>3</sub>) δ [7.45 (dd, *J* = 7.6, 1.7 Hz, 0.83H) & 7.14 (dd, *J* = 7.5, 1.7 Hz, 0.16H), *due to Z/E*], [7.29 – 7.26 (m, 0.13H) & 7.25 – 7.19 (m, 0.86H), *due to Z/E*], 6.96 – 6.89 (m, 2H), [6.87 (d, *J* = 8.2 Hz, 1H) & 6.66 (d, *J* = 11.7 Hz, 0.16H), *due to Z/E*], [6.36 – 6.25 (m, 0.82H) & 5.92 – 5.84 (m, 0.16H), *due to Z/E*], [4.39 – 4.37 (m, 1.81H) & 4.37 – 4.36 (m, 0.18H), *due to Z/E*], [3.85 (s, 2.44H) & 3.84 (s, 0.55H), *due to Z/E*], [0.97 (s, 7.40H) & 0.91 (s, 1.60H), *due to Z/E*], [0.13 (s, 4.96H) & 0.06 (s, 1.04H), *due to Z/E*];

<sup>13</sup>C NMR (126 MHz, CDCl<sub>3</sub>) δ (157.0 & 156.8, *due to Z/E*), 132.0, (130.3 & 129.9, *due to Z/E*), (128.7 & 128.4, *due to Z/E*), (127.0 & 126.3, *due to Z/E*), (125.4 & 124.7, *due to Z/E*), (120.7 & 120.1, *due to Z/E*), (110.9 & 110.4, *due to Z/E*), (64.5 & 60.5, *due to Z/E*), (55.5 & 55.5, *due to Z/E*), (26.1 & 26.0, *due to Z/E*), (18.5 & 18.4, *due to Z/E*), (-4.9 & -5.0, *due to Z/E*);

HRMS (ESI) calcd. for C<sub>16</sub>H<sub>26</sub>O<sub>2</sub>SiNa [M+Na]<sup>+</sup> m/z 301.1594, found 301.1592;

IR (neat, cm<sup>-1</sup>) 2929, 2855, 1437, 1241, 830, 747.

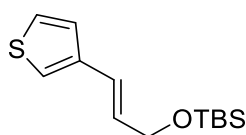

**tert-Butyldimethyl((3-(thiophen-3-yl)allyl)oxy)silane (4r):**

Yield 85% (> 95:5 *E/Z*), colorless liquid;

<sup>1</sup>H NMR (500 MHz, CDCl<sub>3</sub>) δ 7.28 – 7.25 (m, 1H), 7.23 – 7.20 (m, 1H), 7.15 – 7.13 (m, 1H), 6.64 – 6.57 (m, 1H), 6.19 – 6.12 (m, 1H), 4.33 (dd, *J* = 5.1, 1.8 Hz, 2H), 0.96 (s, 9H), 0.13 (s, 6H);

<sup>13</sup>C NMR (126 MHz, CDCl<sub>3</sub>) δ 139.8, 129.1, 125.9, 125.2, 123.9, 121.7, 63.8, 26.1, 18.6, -5.0;

HRMS (ESI) calcd. for C<sub>13</sub>H<sub>22</sub>OSSiNa [M+Na]<sup>+</sup> m/z 277.1053, found 277.1050;

IR (neat, cm<sup>-1</sup>) 2953, 2855, 1252, 1061, 831, 771.



### General procedure (E) for the preparation of olefin (*E*)-4h-D<sup>[4,5,6]</sup>

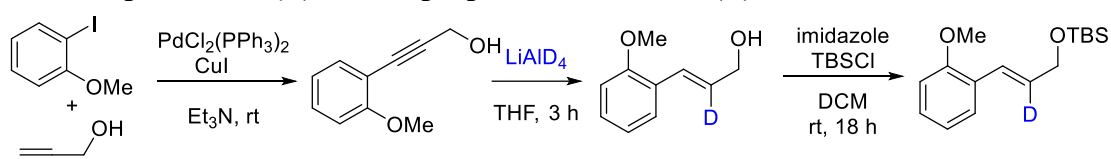

#### Step 1:

To a stirred solution of substituted iodobenzene (10 mmol, 1.0 equiv) in triethylamine (50 mL) under nitrogen were sequentially added  $\text{Pd}(\text{PPh}_3)_2\text{Cl}_2$  (2 mol %) and  $\text{CuI}$  (4 mol %) at room temperature. The mixture was allowed to stir for 10 min. Then propargyl alcohol (11 mmol, 1.1 equiv) was added. The mixture was allowed to stir overnight. After the reaction was finished, water was added and the solution was extracted with ethyl acetate; The combined extract was dried with anhydrous  $\text{MgSO}_4$ . Solvent was removed, and the residue was separated by column chromatography to give the aryl substituted propargyl alcohol.

#### Step 2:

To a flame dried round-bottomed flask charged with  $\text{LiAlD}_4$  (210 mg, 5 mmol, 100 mol%) under nitrogen was added THF (15 mL, 0.33 M with respect to propargylic alcohol). The reaction vessel was placed in an ice bath. After 5 minutes a solution of aryl substituted propargyl alcohol (5 mmol, 100 mol%) in dry THF (5 mL, 1.0 M with respect to propargylic alcohol) was added slowly and the mixture was stirred at room temperature for 3 hours. After the reaction vessel was placed in an ice bath, water (1 mL),  $\text{NaOH}$  (1 mL, 10% aqueous solution) and water (3 mL) were added to the reaction mixture. After 10 minutes,  $\text{MgSO}_4$  was added and the reaction mixture was filtered (celite) with the aid of  $\text{CH}_2\text{Cl}_2$  (10 mL) and the filtrate was concentrated under reduced pressure. The resulting oily residue was subjected to the next step without further purification.

#### Step 3:

To a flame-dried 25 mL round bottom flask was added allylic alcohol (1 equiv) in dry DCM (0.3 M). Then imidazole (1.5 equiv) and trialkylsilyl chloride (1.3 equiv) were added. The reaction was stirred at room temperature for 18 h. The reaction was quenched with water and was extracted with ether (2 x 15 mL). Organic layers were

combined, washed with brine (20 mL), dried over magnesium sulfate, filtered and concentrated in vacuum to provide a crude oil which was purified by flash chromatography to provide the desired product.

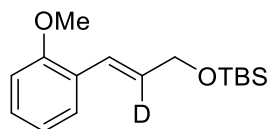

**(*E*)-tert-Butyl((3-(2-methoxyphenyl)allyl-2-*d*)oxy)dimethylsilane (4h-D):**

**Yield** 65%, colorless liquid;

**<sup>1</sup>H NMR** (500 MHz, CDCl<sub>3</sub>) δ 7.43 (dd, *J* = 7.6, 1.7 Hz, 1H), 7.24 – 7.18 (m, 1H), 6.94 – 6.83 (m, 3H), 4.36 (d, *J* = 1.8 Hz, 2H), 3.84 (s, 3H), 0.95 (s, 9H), 0.12 (s, 6H);

**<sup>13</sup>C NMR** (126 MHz, CDCl<sub>3</sub>) δ 156.8, 129.6 (t, *J* = 23.6 Hz), 128.4, 127.1, 126.3, 124.6, 120.7, 110.9, 64.5, 55.6, 26.1, 18.6, –4.9;

**HRMS** (ESI) calcd. for C<sub>16</sub>H<sub>25</sub>DO<sub>2</sub>SiNa [M+Na]<sup>+</sup> *m/z* 302.1657, found 302.1658;

**IR** (neat, cm<sup>-1</sup>) 2928, 2855, 1462, 1244, 833, 747.

## Isotopic Labelling Experiments

### a) NiD experiment: NiD *syn*-hydrometallation is not the enantio-determining step

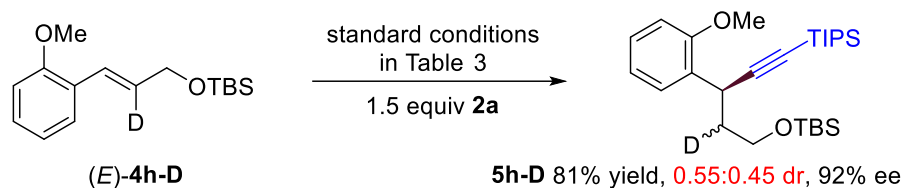

***tert*-Butyl(((2*S*,3*S*)-3-(2-methoxyphenyl)-5-(triisopropylsilyl)pent-4-yn-1-yl-2-*d*)oxy)dimethylsilane** (Figure 5, **5h-D**). From (***E***)-***tert*-butyl((3-(2-methoxyphenyl)allyl-2-*d*)oxy)dimethylsilane** (**4h-D**) (55.9 mg, 0.20 mmol) and (**bromoethynyl**)triisopropylsilane (**2a**) (78.4 mg, 0.30 mmol), the title compound was prepared following the general procedure **B** using NiI<sub>2</sub>·xH<sub>2</sub>O (3.8 mg, 5.0 mol%), (*S*)-**L\*** (3.3 mg, 6.0 mol%), K<sub>3</sub>PO<sub>4</sub>·H<sub>2</sub>O (115.1 mg, 2.5 equiv), NaI (60.0 mg, 2.0 equiv), (MeO)<sub>3</sub>SiH (64 μL, 0.5 mmol, 2.5 equiv), anhydrous PhCF<sub>3</sub> (1.0 mL). The reaction mixture was stirred for 12 h at 0 °C. The crude material was purified by flash column chromatography (petroleum ether/EtOAc = 100:1) to provide the title compound as a colorless liquid in 81% yield (74.4 mg).

**<sup>1</sup>H NMR** (500 MHz, CDCl<sub>3</sub>) δ 7.64 – 7.58 (m, 1H), 7.25 – 7.17 (m, 1H), 6.99 – 6.91 (m, 1H), 6.84 (dd, *J* = 8.2, 1.1 Hz, 1H), 4.32 – 4.26 (m, 1H), 3.92 – 3.86 (m, 1H), 3.83 – 3.78 (m, 4H), [2.03 – 1.95 (m, 0.45H) & 1.77 – 1.68 (m, 0.55H), *due to dr*], 1.15 – 1.05 (m, 21H), 0.92 (s, 9H), 0.08 (s, 3H), 0.07 (s, 3H);

**<sup>13</sup>C NMR** (126 MHz, CDCl<sub>3</sub>) δ 156.1, 130.4, 128.6, 127.7, 120.6, 110.3, 110.1, 82.7, 61.5, 55.3, 39.8 – 39.4 (m, 1C), 29.1, 26.0, 18.9, 18.8, 18.4, 11.4, –5.0, –5.1;

**<sup>2</sup>H NMR** (92 MHz, CDCl<sub>3</sub>) δ 2.00 (0.55D), 1.74 (0.45D);

**HRMS** (ESI) calcd. for C<sub>27</sub>H<sub>47</sub>DO<sub>2</sub>Si<sub>2</sub>Na [M+Na]<sup>+</sup> *m/z* 484.3148, found 484.3147;

**IR** (neat, cm<sup>-1</sup>) 2943, 2864, 2164, 1244, 1090, 835;

[α]<sub>D</sub><sup>18</sup> = –31.2 (*c* = 1.24, CHCl<sub>3</sub>); 92% *ee*;

**HPLC analysis** CHIRALCEL two connected OD-H columns, *n*-hexane/*iso*-propanol = 100/0, flow rate 0.5 mL/min, 220 nm UV detector, *t*<sub>R</sub> (minor) = 14.5 min, *t*<sub>R</sub> (major) = 18.0 min.

**b) Crossover experiment: no intermolecular H/D scrambled crossover products**

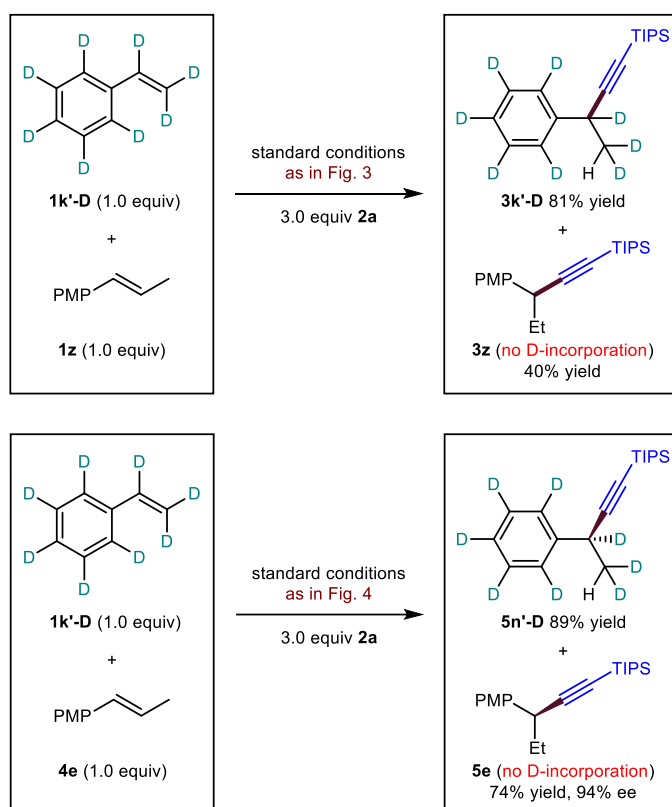

From **styrene-*d*<sub>8</sub>** (**1k'-D**) (11.2 mg, 0.1 mmol) and **(*E*)-1-methoxy-4-(prop-1-en-1-yl)benzene** (**1z**) (14.8 mg, 0.1 mmol), the title compound was prepared following the general procedure **A** using  $\text{NiI}_2 \cdot x\text{H}_2\text{O}$  (3.8 mg, 10 mol%), **L** (3.3 mg, 12 mol%),  $\text{Na}_2\text{CO}_3$  (42.4 mg, 4.0 equiv), NaI (3.0 mg, 0.2 equiv), PMHS (60  $\mu\text{L}$ , 1.0 mmol, 10.0 equiv), anhydrous DME (1.0 mL). The reaction mixture was stirred for 16 h at 25 °C. The crude material was purified by flash column chromatography (petroleum ether) to provide the title compound.

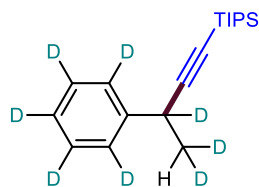

**Triisopropyl(3-(phenyl-*d*<sub>5</sub>)but-1-yn-1-yl-4,4-*d*<sub>3</sub>)silane** (Figure 5, **3k'-D**):

**Yield** 81%, colorless liquid;

**<sup>1</sup>H NMR** (400 MHz,  $\text{CDCl}_3$ )  $\delta$  1.49 (s, 1H), 1.15 – 1.06 (m, 21H);

$^{13}\text{C}$  NMR (101 MHz,  $\text{CDCl}_3$ )  $\delta$  143.2, [128.2 & 128.0 & 127.7] (1C), [126.8 & 126.6 & 126.3] (1C), [126.0 & 125.8] (1C), 111.4, 82.3, 24.9 – 24.1, 18.8, 11.4;  
 $^2\text{H}$  NMR (92 MHz,  $\text{CDCl}_3$ ) [7.44 & 7.35, (5D)], 3.78 (1D), 1.47 (2D);  
HRMS (ESI) calcd. for  $\text{C}_{19}\text{H}_{22}\text{D}_8\text{SiNa}$   $[\text{M}+\text{H}]^+$   $m/z$  295.2692, found 295.2686;  
IR (neat,  $\text{cm}^{-1}$ ) 2942, 2864, 2167, 1462, 996, 882;

From **styrene- $d_8$**  (**1k'-D**) (11.2 mg, 0.1 mmol) and (**E**)-**1-methoxy-4-(prop-1-en-1-yl)benzene** (**4e**) (14.8 mg, 0.1 mmol). the title compound was prepared following the general procedure **B** using  $\text{NiI}_2 \cdot x\text{H}_2\text{O}$  (3.8 mg, 10 mol%), (*S*)-**L\*** (3.3 mg, 12 mol%),  $\text{K}_3\text{PO}_4 \cdot \text{H}_2\text{O}$  (115.1 mg, 5.0 equiv), NaI (60.0 mg, 4.0 equiv),  $(\text{MeO})_3\text{SiH}$  (64  $\mu\text{L}$ , 0.5 mmol, 5.0 equiv), anhydrous  $\text{PhCF}_3$  (1.0 mL). The reaction mixture was stirred for 12 h at 0 °C. The crude material was purified by flash column chromatography (petroleum ether) to provide the title compound.

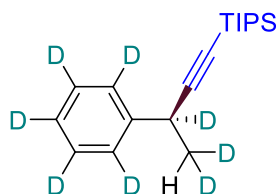

(*S*)-Triisopropyl(3-(phenyl- $d_5$ )but-1-yn-1-yl-3,4,4- $d_3$ )silane (Figure 5, **5n'-D**):

Yield 89%, colorless liquid;

$^1\text{H}$  NMR (500 MHz,  $\text{CDCl}_3$ )  $\delta$  1.47 (s, 1H), 1.15 – 0.77 (m, 21H);

$^{13}\text{C}$  NMR (126 MHz,  $\text{CDCl}_3$ )  $\delta$  143.2, [128.2 & 128.0 & 127.8] (1C), [126.8 & 126.6 & 126.4] (1C), [126.2 & 126.0 & 125.9] (1C), 111.4, 82.3, 24.9 – 24.2 (m, 1C), 18.8, 11.4;

$^2\text{H}$  NMR (92 MHz,  $\text{CDCl}_3$ )  $\delta$  [7.46 & 7.36, (5D)], 3.79 (1D), 1.48 (2D);

HRMS (ESI) calcd. for  $\text{C}_{19}\text{H}_{22}\text{D}_8\text{SiNa}$   $[\text{M}+\text{Na}]^+$   $m/z$  317.2511, found 317.2507;

IR (neat,  $\text{cm}^{-1}$ ) 2942, 2864, 2168, 1462, 882, 659;

**Supplementary Note 1.** Spectroscopic Data (GC Traces)

- 1) *n*-Dodecane ( $t_R = 2.0$  min) was used as internal standard for GC yield.
- 2) GC analysis was performed on Agilent 7890B gas chromatograph with an FID detector using a J & W DB-1 column (10 m, 0.1 mm I.D.). GC-MS analysis was performed on an Agilent 7890B gas chromatograph with 5977A MSD mass spectrum using an HP-5 MS column (30 m, 0.25 mm I.D.).
- 3) GC method: 100 method starts at 100 °C holds the oven at this temperature for 1 minute, then ramp of 50 °C/min till 250 °C and hold the oven at this temperature for 3 minutes (or 5 minutes for 100B method, or 16 minutes for 100C method).
- 4) *rr* refers to regioisomeric ratio, represents the ratio of major product to the sum of all other isomers as determined by GC, all isomers' peaks were confirmed by GC-MS analysis.

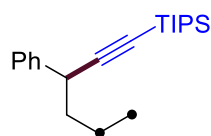

**3a**

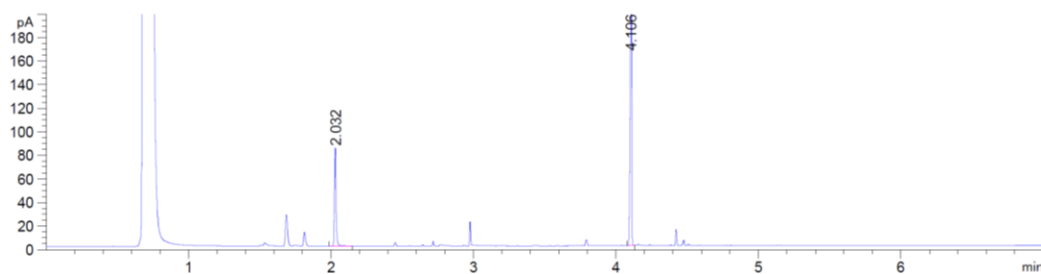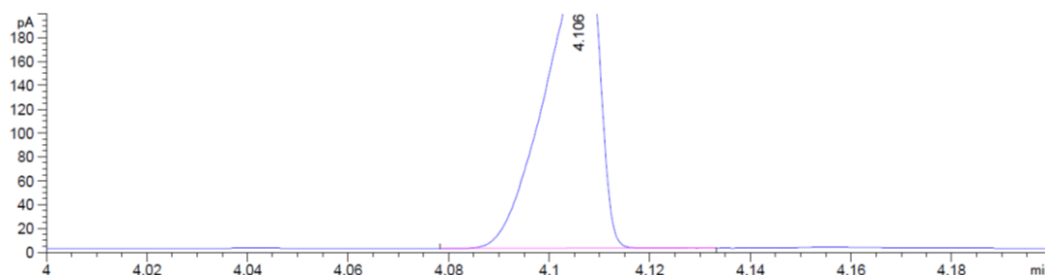

| Peak # | Time [min] | Type | Width [min] | Area [pA*s] | Height [pA] | Area %  |
|--------|------------|------|-------------|-------------|-------------|---------|
| 1      | 4.106      | BB   | 0.0113      | 186.16582   | 244.35548   | 1.000e2 |

**Supplementary Fig. 3.** GC spectra of compound **3a**, Related to Figure 3.

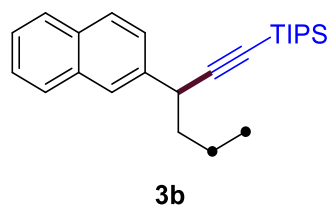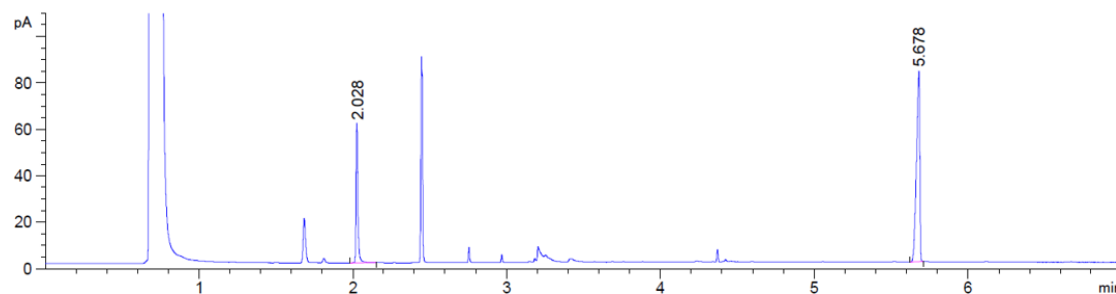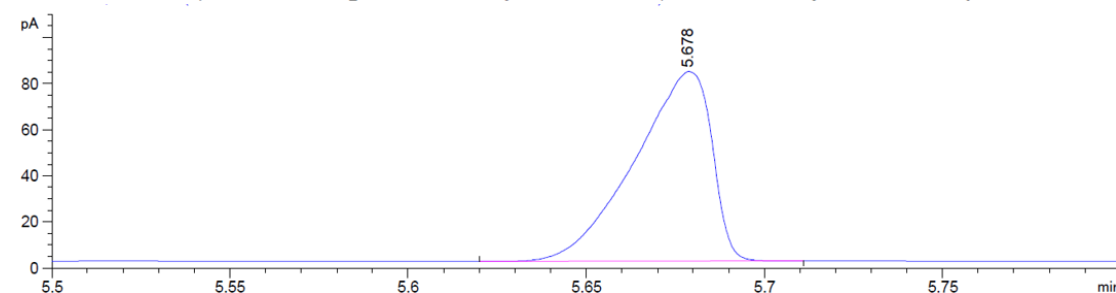

| Peak # | Time [min] | Type | Width [min] | Area [pA*s] | Height [pA] | Area %  |
|--------|------------|------|-------------|-------------|-------------|---------|
| 1      | 5.678      | BB   | 0.0232      | 123.87083   | 82.12784    | 1.000e2 |

**Supplementary Fig. 4.** GC spectra of compound **3b**, Related to Figure 3.

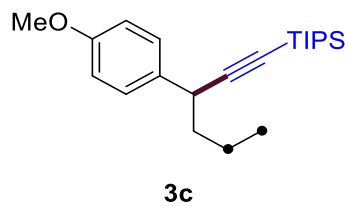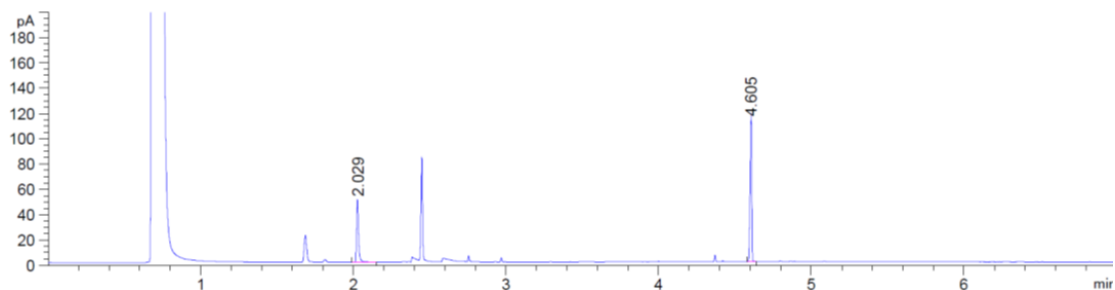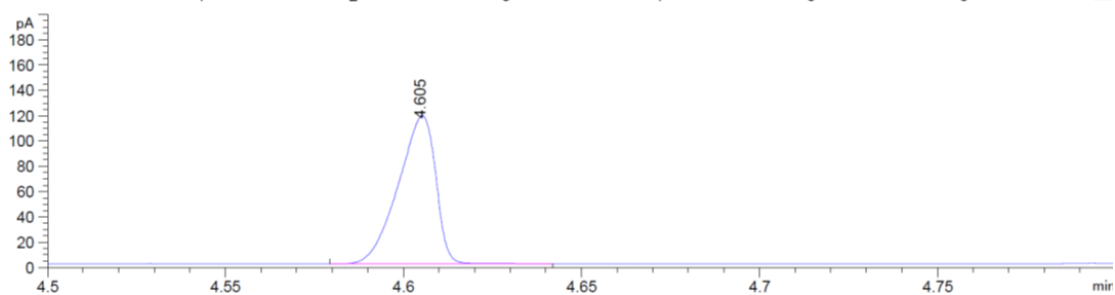

| Peak # | Time [min] | Type | Width [min] | Area [pA*s] | Height [pA] | Area %  |
|--------|------------|------|-------------|-------------|-------------|---------|
| 1      | 4.605      | BB   | 0.0121      | 85.66869    | 111.75015   | 1.000e2 |

**Supplementary Fig. 5.** GC spectra of compound **3c**, Related to Figure 3.

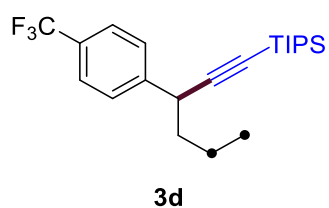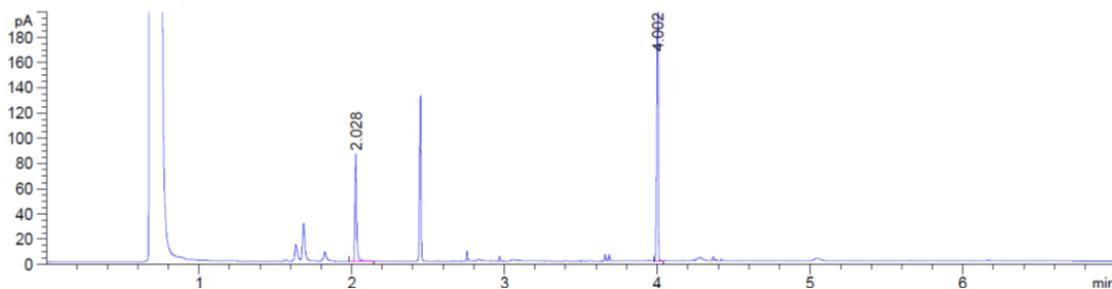



| Peak # | Time [min] | Type | Width [min] | Area [pA*s] | Height [pA] | Area %  |
|--------|------------|------|-------------|-------------|-------------|---------|
| 1      | 4.002      | BB   | 0.0114      | 154.49745   | 219.06358   | 1.000e2 |

**Supplementary Fig. 6.** GC spectra of compound **3d**, Related to Figure 3.

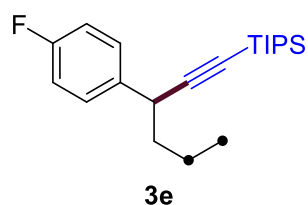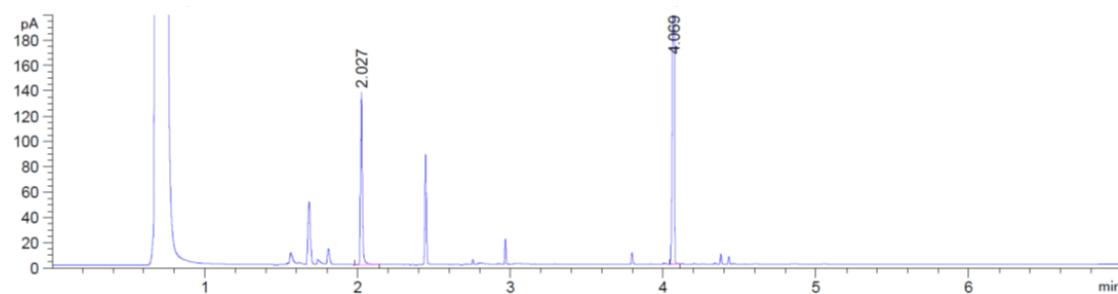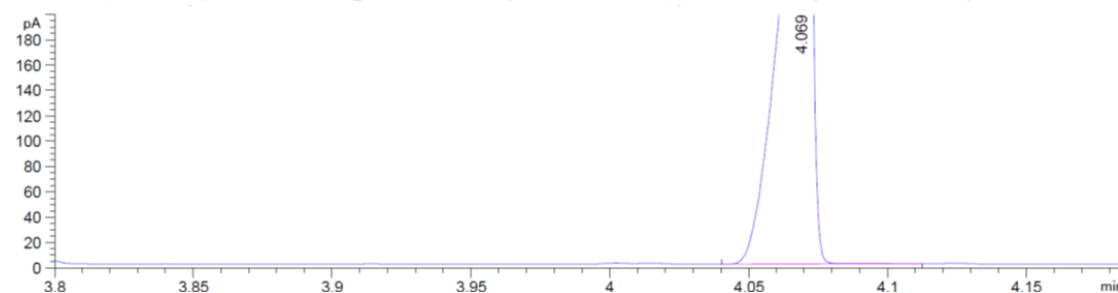

| Peak # | Time [min] | Type | Width [min] | Area [pA*s] | Height [pA] | Area %  |
|--------|------------|------|-------------|-------------|-------------|---------|
| 1      | 4.069      | BB   | 0.0132      | 306.20294   | 355.76334   | 1.000e2 |

**Supplementary Fig. 7.** GC spectra of compound **3e**, Related to Figure 3.

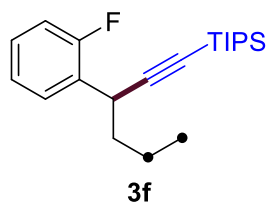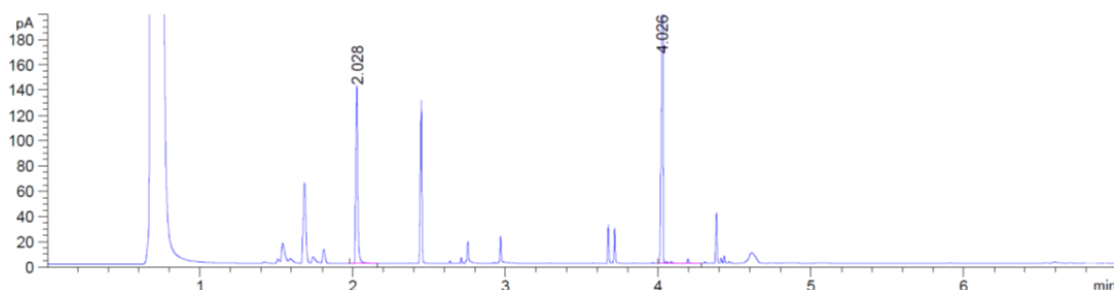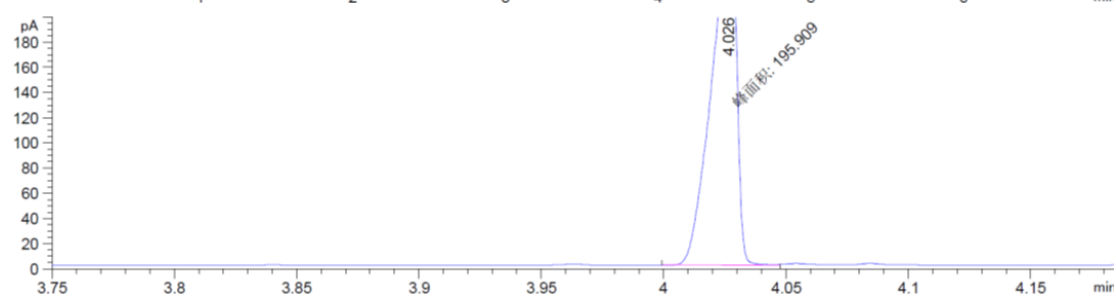

| Peak # | Time [min] | Type | Width [min] | Area [pA*s] | Height [pA] | Area %  |
|--------|------------|------|-------------|-------------|-------------|---------|
| 1      | 4.026      | MM   | 0.0113      | 195.90855   | 290.07196   | 1.000e2 |

**Supplementary Fig. 8.** GC spectra of compound **3f**, Related to Figure 3.

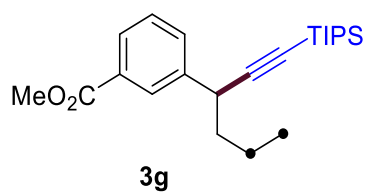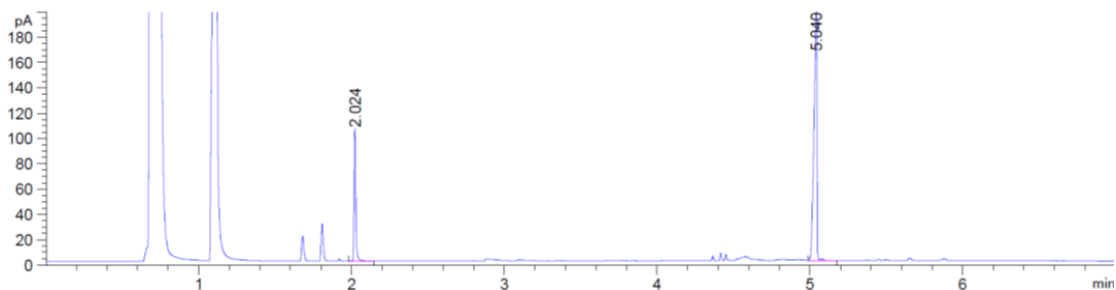

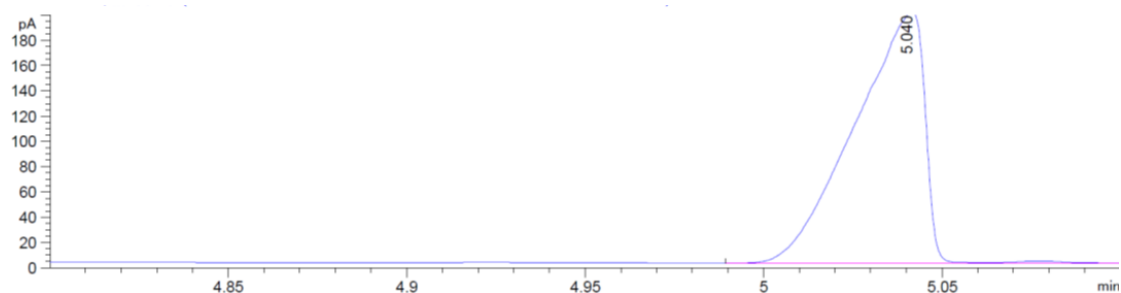

| Peak # | Time [min] | Type | Width [min] | Area [pA*s] | Height [pA] | Area %  |
|--------|------------|------|-------------|-------------|-------------|---------|
| 1      | 5.040      | BV R | 0.0188      | 271.26648   | 201.11446   | 1.000e2 |

**Supplementary Fig. 9.** GC spectra of compound **3g**, Related to Figure 3.

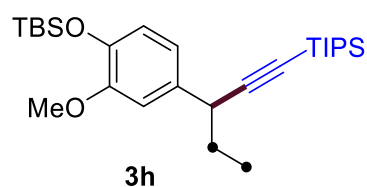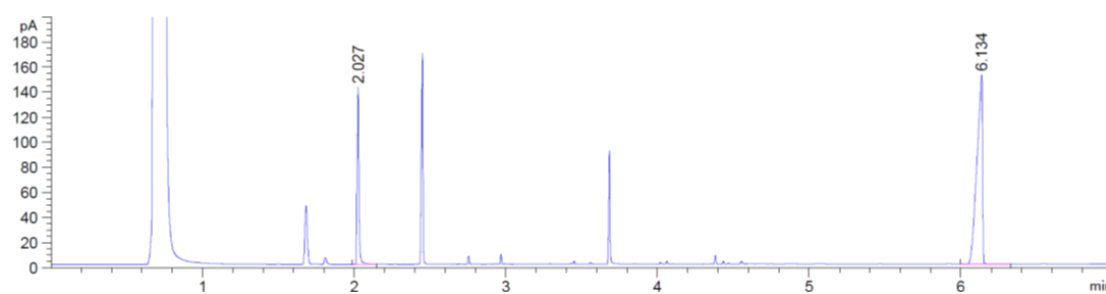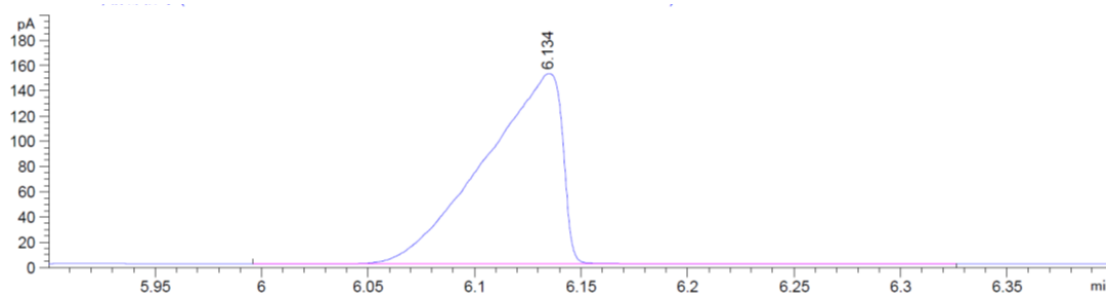

| Peak # | Time [min] | Type | Width [min] | Area [pA*s] | Height [pA] | Area %  |
|--------|------------|------|-------------|-------------|-------------|---------|
| 1      | 6.134      | BB   | 0.0337      | 383.35068   | 150.40926   | 1.000e2 |

**Supplementary Fig. 10.** GC spectra of compound **3h**, Related to Figure 3.

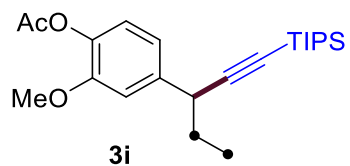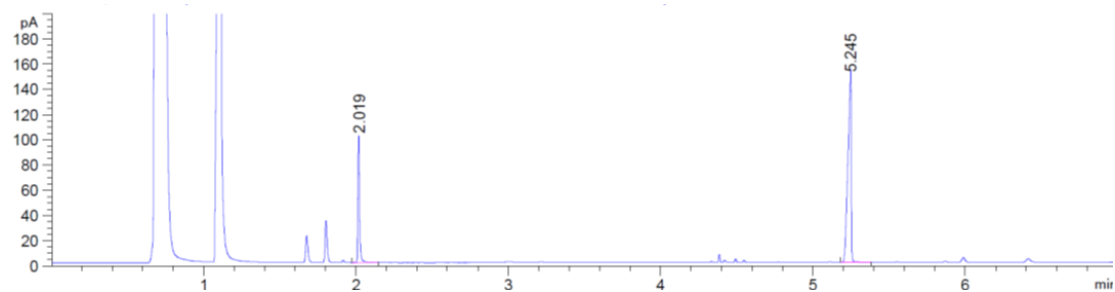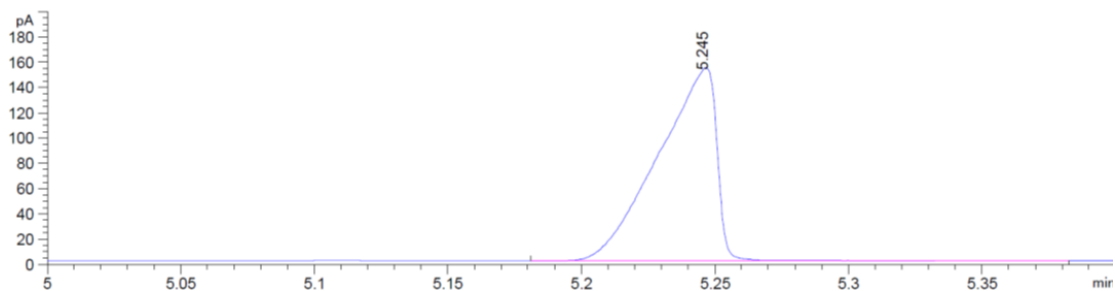

| Peak # | Time [min] | Type | Width [min] | Area [pA*s] | Height [pA] | Area %  |
|--------|------------|------|-------------|-------------|-------------|---------|
| 1      | 5.245      | BB   | 0.0224      | 232.19344   | 147.24724   | 1.000e2 |

**Supplementary Fig. 11.** GC spectra of compound **3i**, Related to Figure 3.

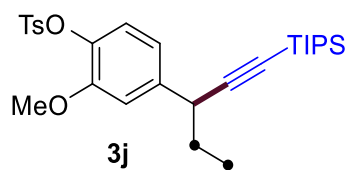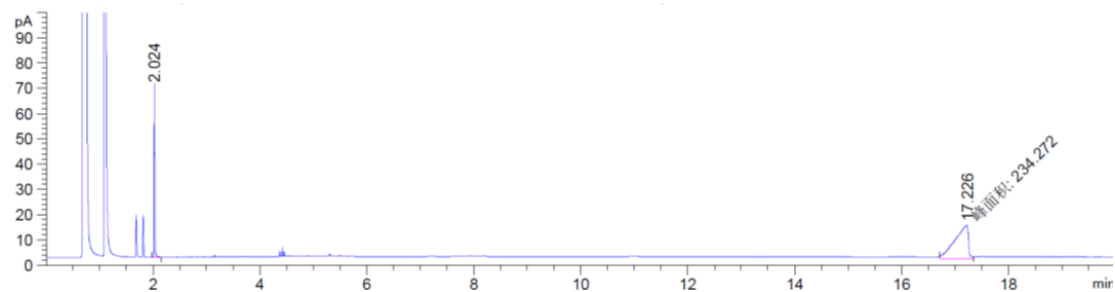

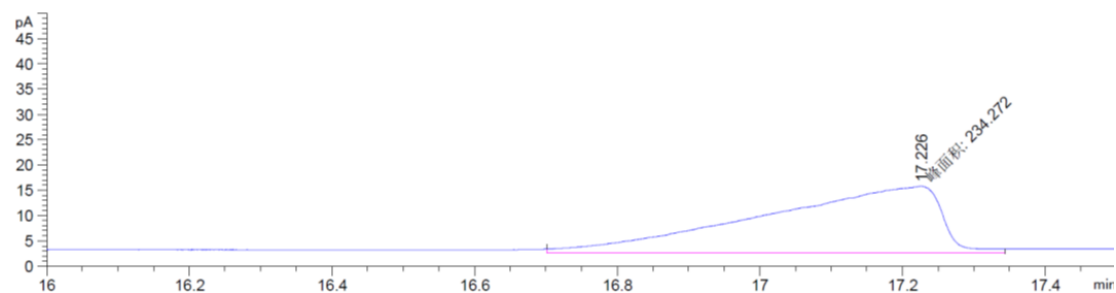

| Peak # | Time [min] | Type | Width [min] | Area [pA*s] | Height [pA] | Area %  |
|--------|------------|------|-------------|-------------|-------------|---------|
| 1      | 17.226     | MM   | 0.2940      | 234.27243   | 13.28021    | 1.000e2 |

**Supplementary Fig. 12.** GC spectra of compound **3j**, Related to Figure 3.

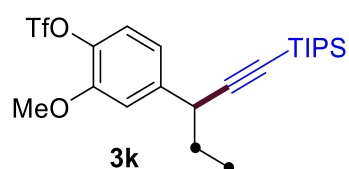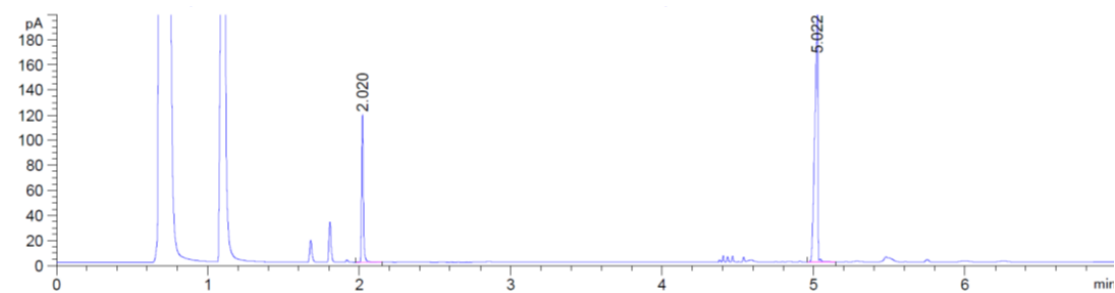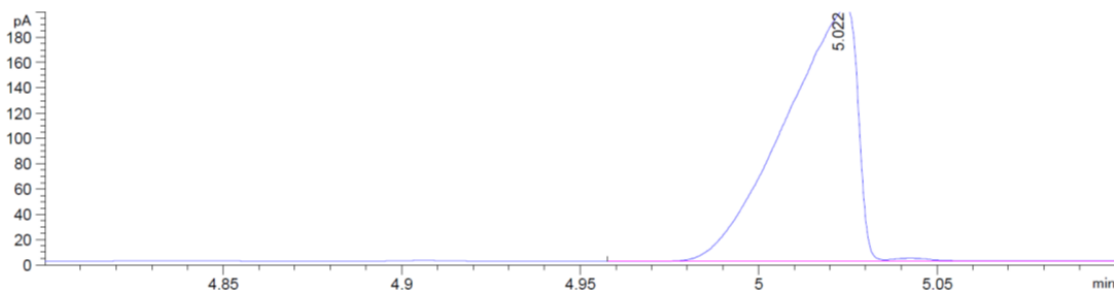

| Peak # | Time [min] | Type | Width [min] | Area [pA*s] | Height [pA] | Area %  |
|--------|------------|------|-------------|-------------|-------------|---------|
| 1      | 5.022      | BB   | 0.0218      | 285.20779   | 195.70508   | 1.000e2 |

**Supplementary Fig. 13.** GC spectra of compound **3k**, Related to Figure 3.

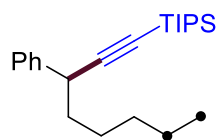

**3l**

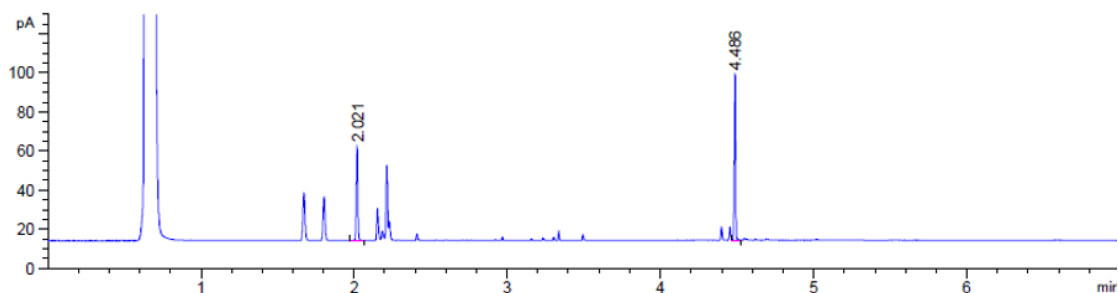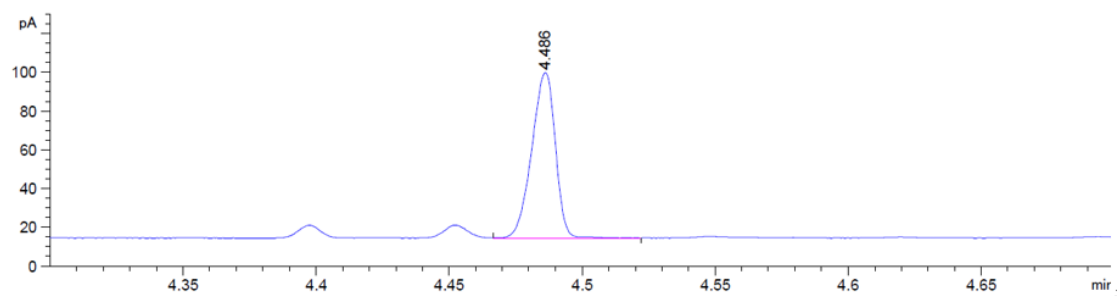

| Peak # | Time [min] | Type | Width [min] | Area [pA*s] | Height [pA] | Area %  |
|--------|------------|------|-------------|-------------|-------------|---------|
| 1      | 4.486      | VB   | 0.0105      | 52.76726    | 84.63114    | 1.000e2 |

**Supplementary Fig. 14.** GC spectra of compound **3l**, Related to Figure 3.

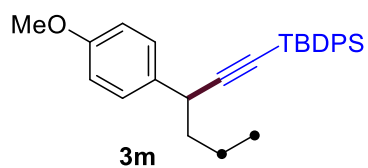

**3m**

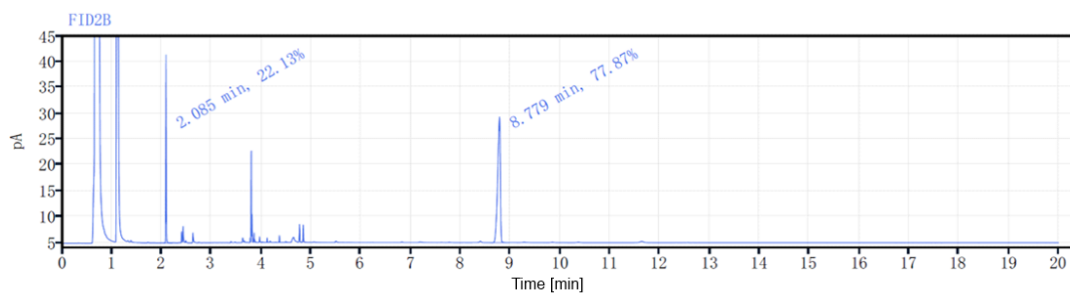

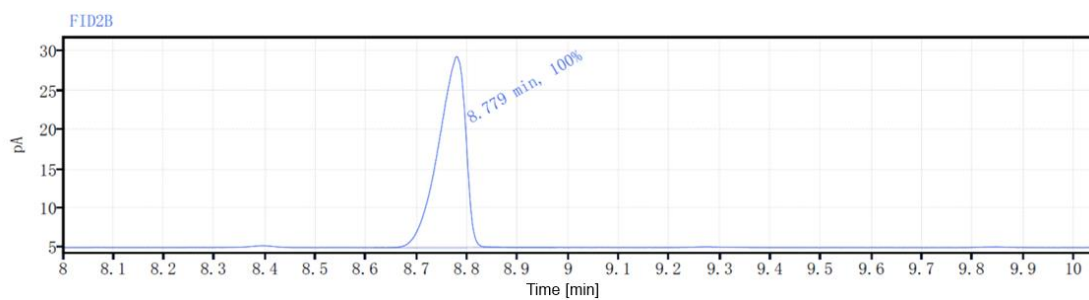

| RetTime (min) | Signal | Width (time) | Area | Height | Area%  |
|---------------|--------|--------------|------|--------|--------|
| 8.779         | FID2B  | 0.359        | 91.9 | 24.4   | 100.00 |

**Supplementary Fig. 15.** GC spectra of compound **3m**, Related to Figure 3.

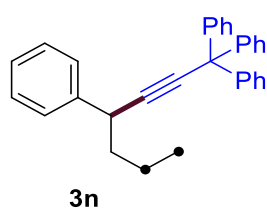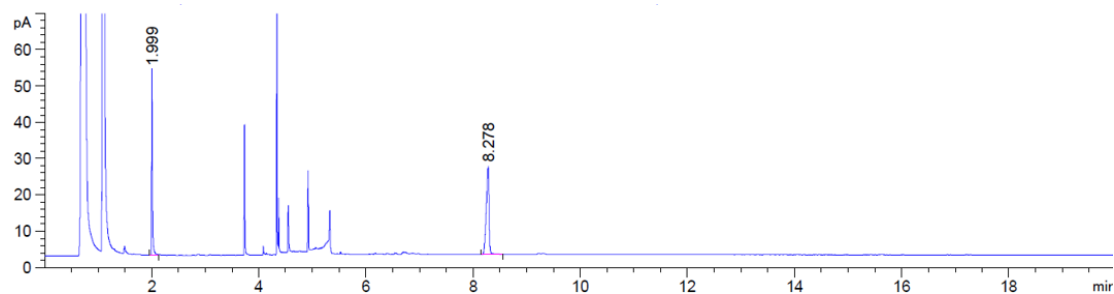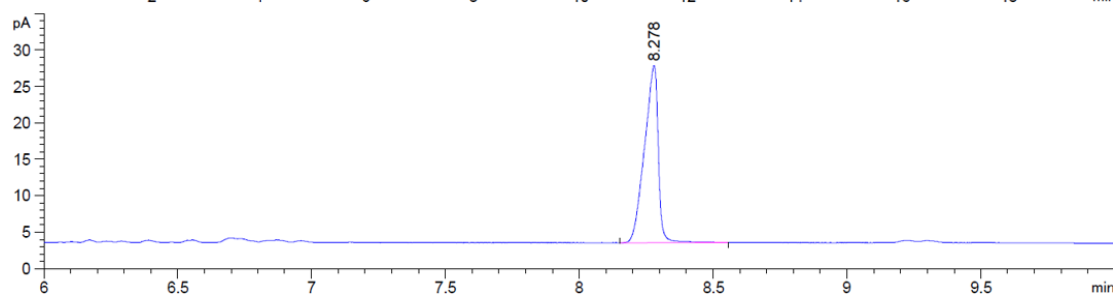

| Peak # | Time [min] | Type | Width [min] | Area [pA*s] | Height [pA] | Area %  |
|--------|------------|------|-------------|-------------|-------------|---------|
| 1      | 8.278      | BB   | 0.0515      | 87.30582    | 24.33629    | 1.000e2 |

**Supplementary Fig. 16.** GC spectra of compound **3n**, Related to Figure 3.

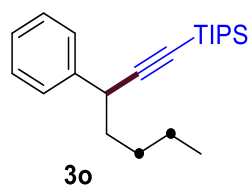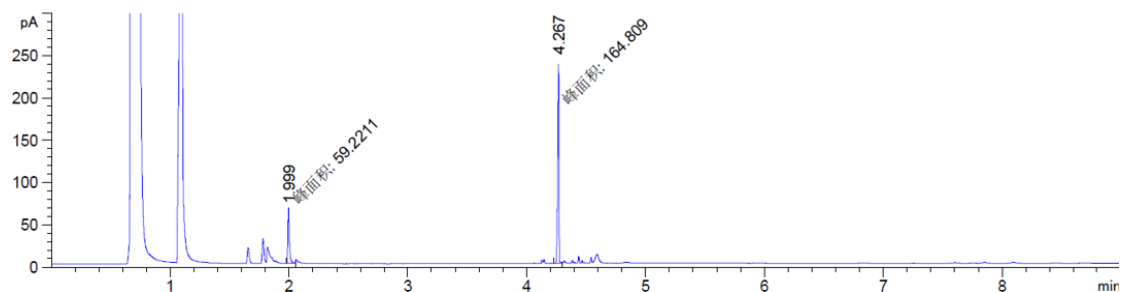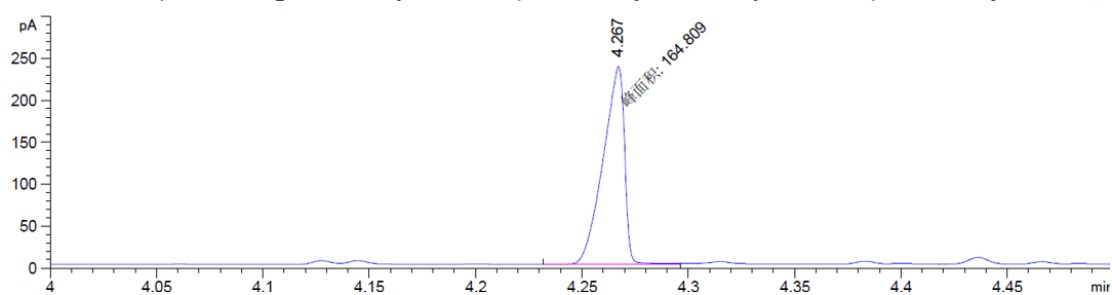

| Peak # | Time [min] | Type | Width [min] | Area [pA*s] | Height [pA] | Area %  |
|--------|------------|------|-------------|-------------|-------------|---------|
| 1      | 4.267      | MF   | 0.0114      | 164.80936   | 241.84032   | 1.000e2 |

**Supplementary Fig. 17.** GC spectra of compound **3o**, Related to Figure 3.



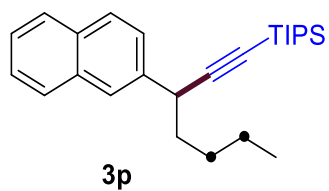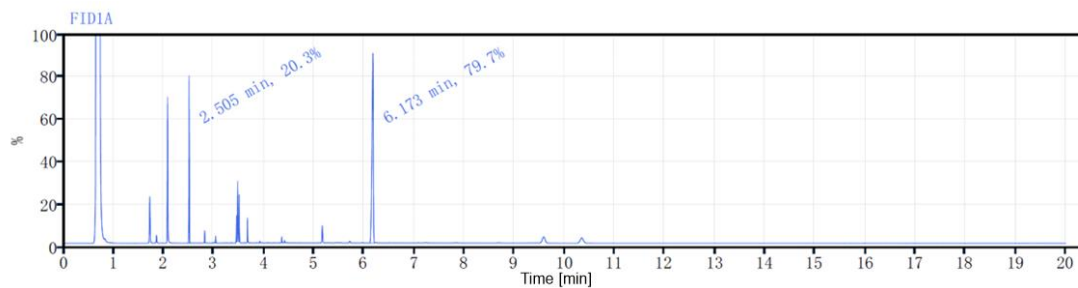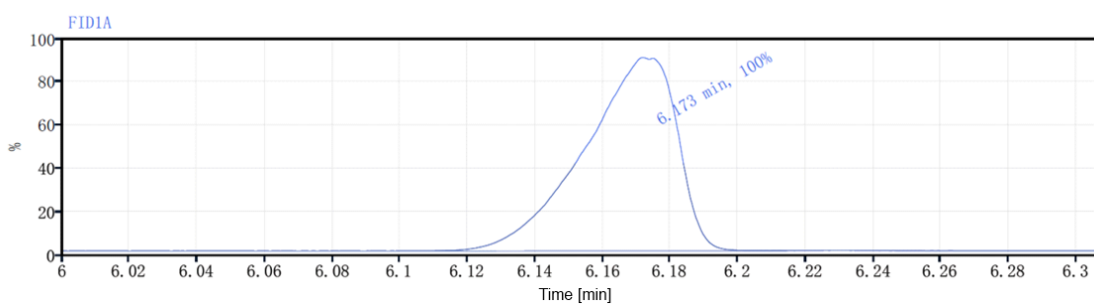

| RetTime (min) | Signal | Width (min) | Area  | Height | Area%  |
|---------------|--------|-------------|-------|--------|--------|
| 6.173         | FID1A  | 0.118       | 116.5 | 60.7   | 100.00 |

**Supplementary Fig. 18.** GC spectra of compound **3p**, Related to Figure 3.

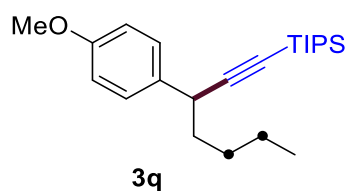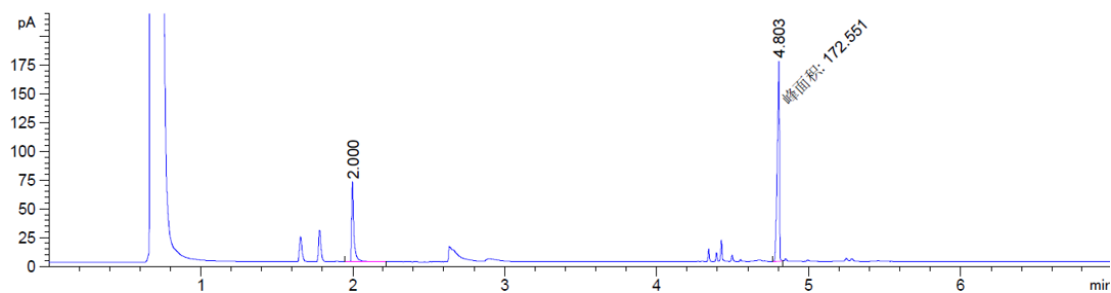

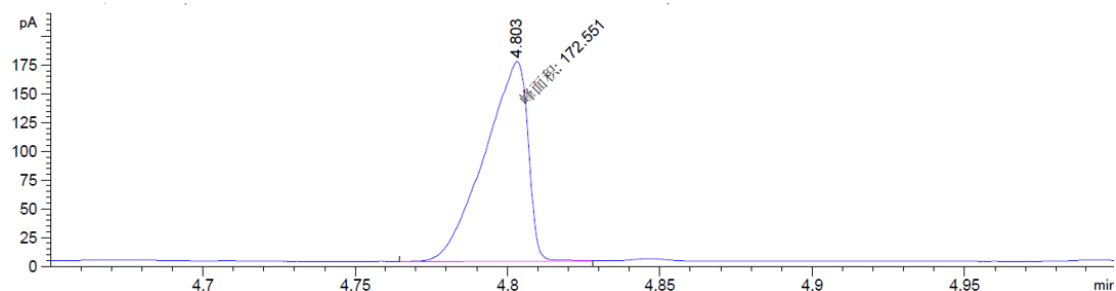

| Peak # | Time [min] | Type | Width [min] | Area [pA*s] | Height [pA] | Area %  |
|--------|------------|------|-------------|-------------|-------------|---------|
| 1      | 4.803      | MF   | 0.0166      | 172.55072   | 173.33826   | 1.000e2 |

**Supplementary Fig. 19.** GC spectra of compound **3q**, Related to Figure 3.

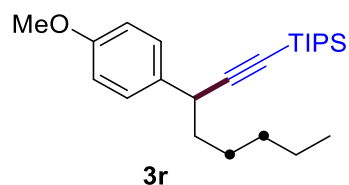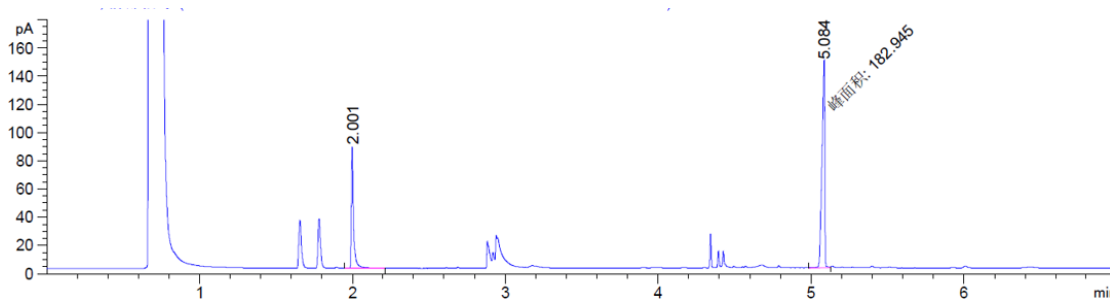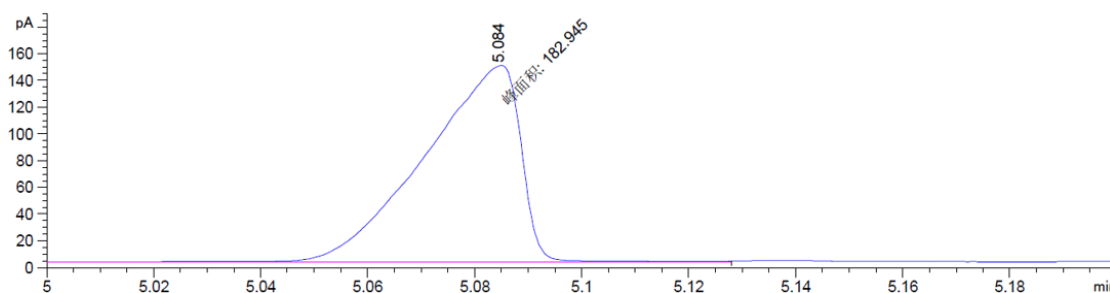

| Peak # | Time [min] | Type | Width [min] | Area [pA*s] | Height [pA] | Area %  |
|--------|------------|------|-------------|-------------|-------------|---------|
| 1      | 5.084      | MF   | 0.0209      | 182.94456   | 146.10146   | 1.000e2 |

**Supplementary Fig. 20.** GC spectra of compound **3r**, Related to Figure 3.

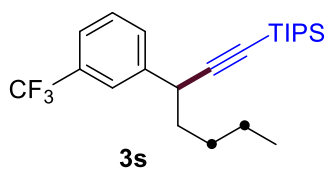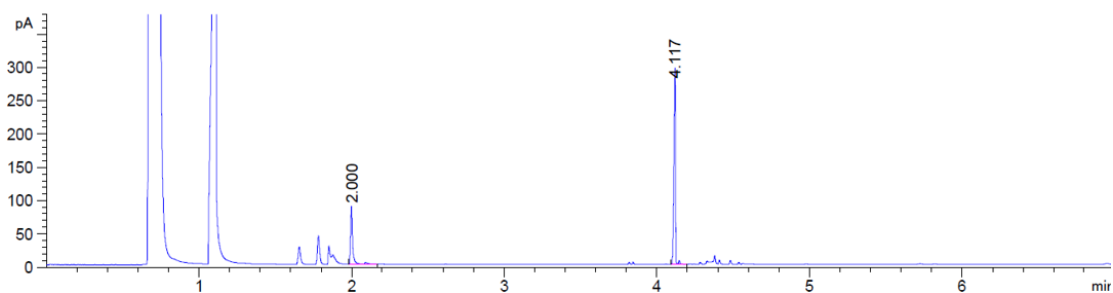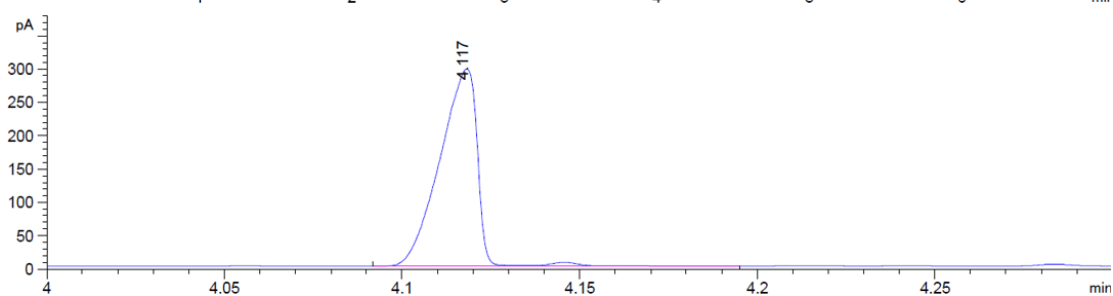

| Peak # | Time [min] | Type | Width [min] | Area [pA*s] | Height [pA] | Area %  |
|--------|------------|------|-------------|-------------|-------------|---------|
| 1      | 4.117      | BV R | 0.0123      | 218.62238   | 273.70059   | 1.000e2 |

**Supplementary Fig. 21.** GC spectra of compound **3s**, Related to Figure 3.

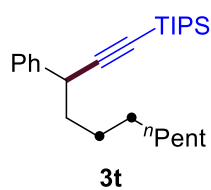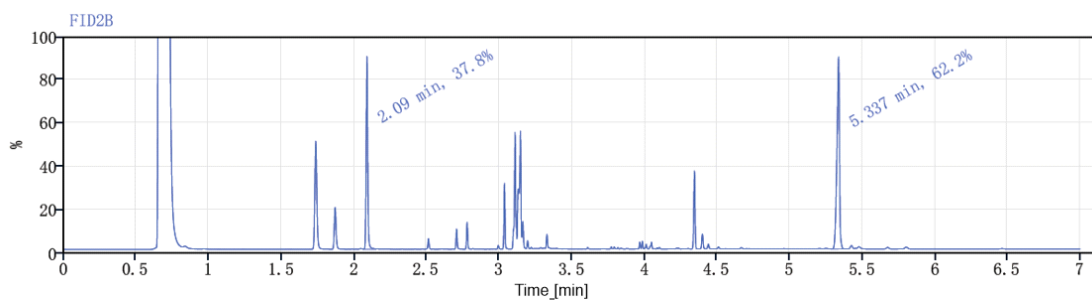

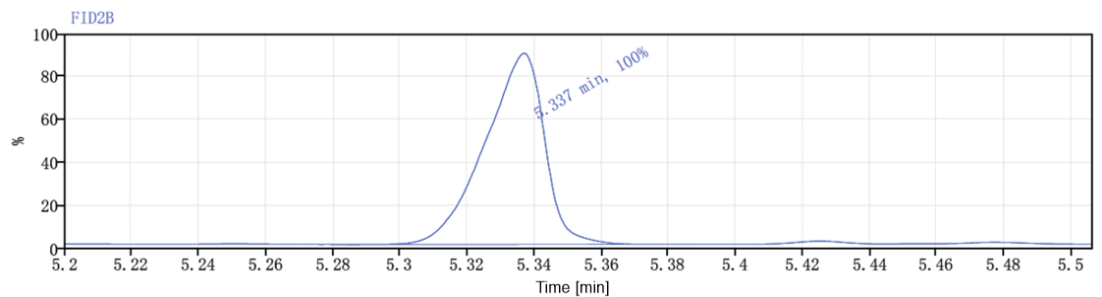

| RetTime (min) | Signal | Width (min) | Area  | Height | Area%  |
|---------------|--------|-------------|-------|--------|--------|
| 5.337         | FID2B  | 0.114       | 118.5 | 95.6   | 100.00 |

**Supplementary Fig. 22.** GC spectra of compound **3t**, Related to Figure 3.

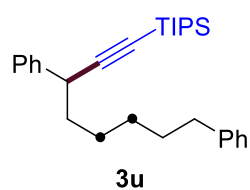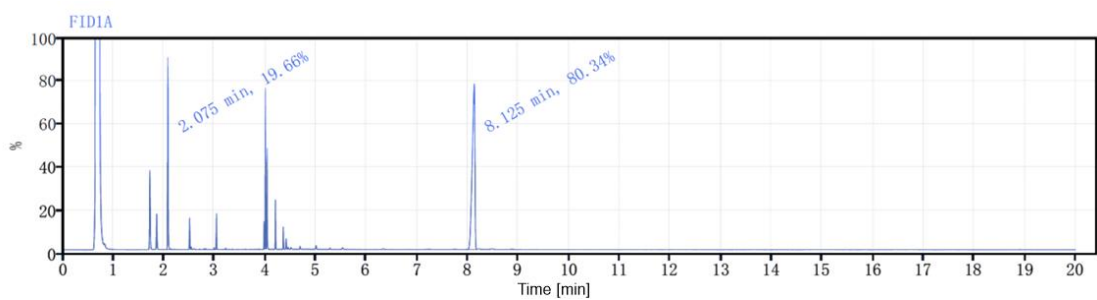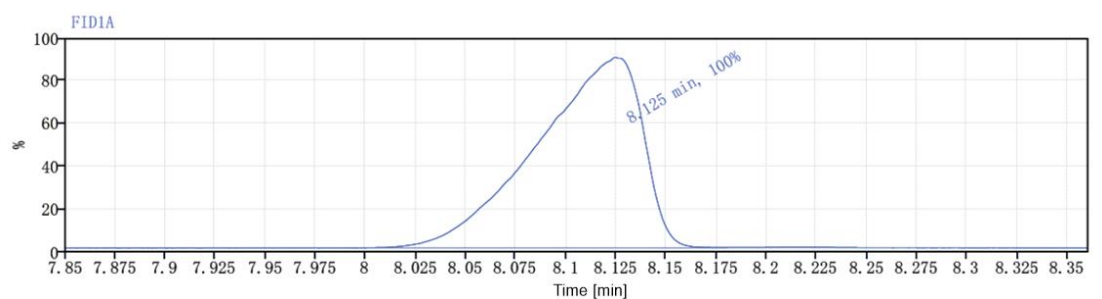

| RetTime (min) | Signal | Width (min) | Area  | Height | Area%  |
|---------------|--------|-------------|-------|--------|--------|
| 8.125         | FID1A  | 0.188       | 147.4 | 40.2   | 100.00 |

**Supplementary Fig. 23.** GC spectra of compound **3u**, Related to Figure 3.

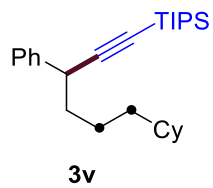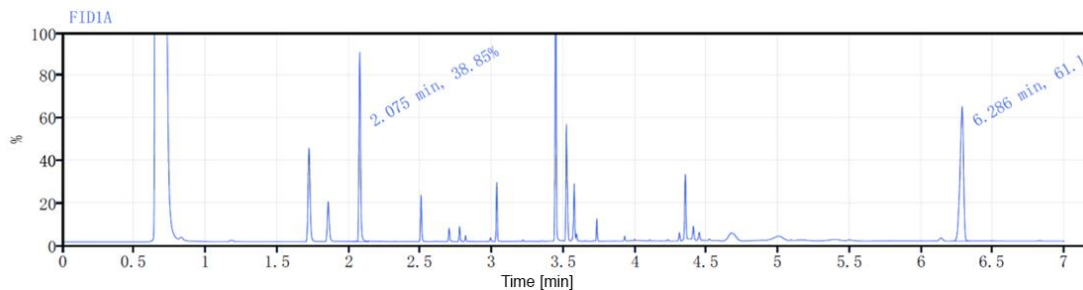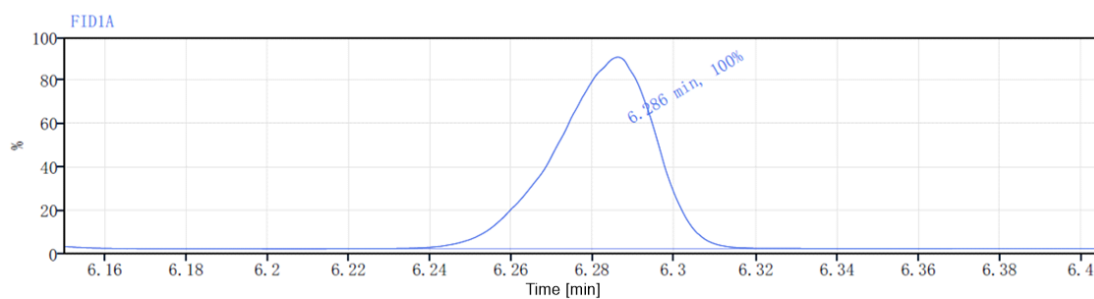

| RetTime (min) | Signal | Width (min) | Area | Height | Area%  |
|---------------|--------|-------------|------|--------|--------|
| 6.286         | FID1A  | 0.170       | 62.0 | 35.9   | 100.00 |

**Supplementary Fig. 24.** GC spectra of compound **3v**, Related to Figure 3.

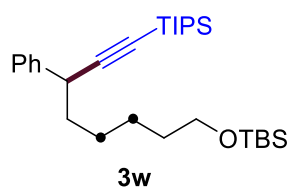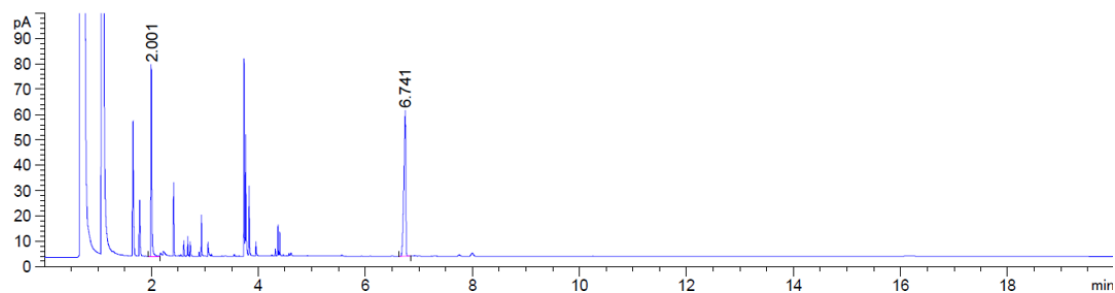

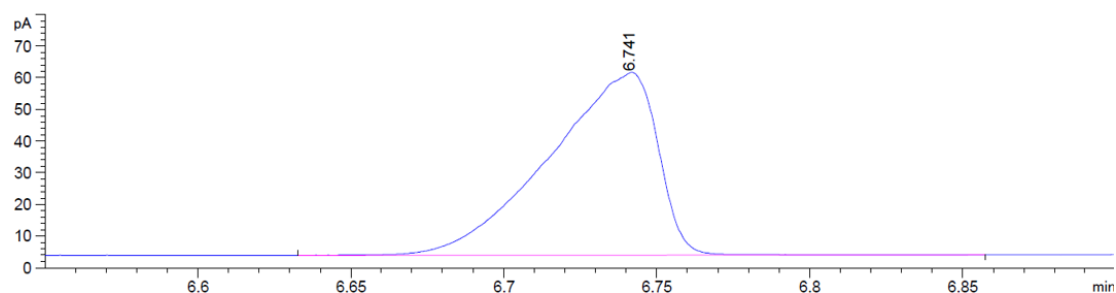

| Peak # | Time [min] | Type | Width [min] | Area [pA*s] | Height [pA] | Area %  |
|--------|------------|------|-------------|-------------|-------------|---------|
| 1      | 6.741      | BB   | 0.0356      | 142.18549   | 56.85785    | 1.000e2 |

**Supplementary Fig. 25.** GC spectra of compound **3w**, Related to Figure 3.

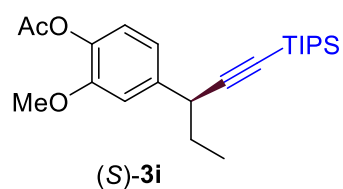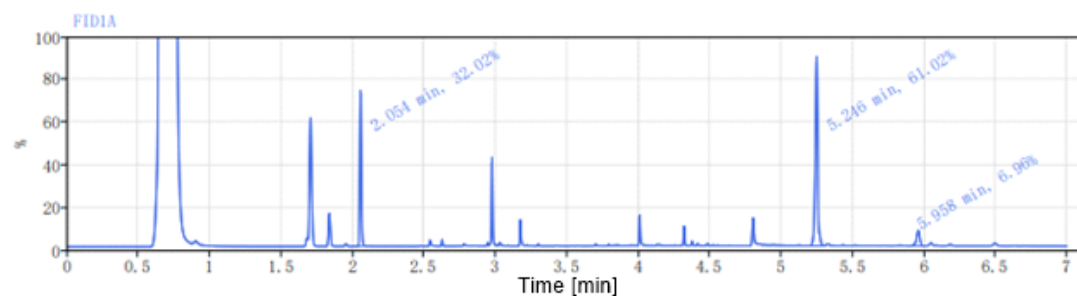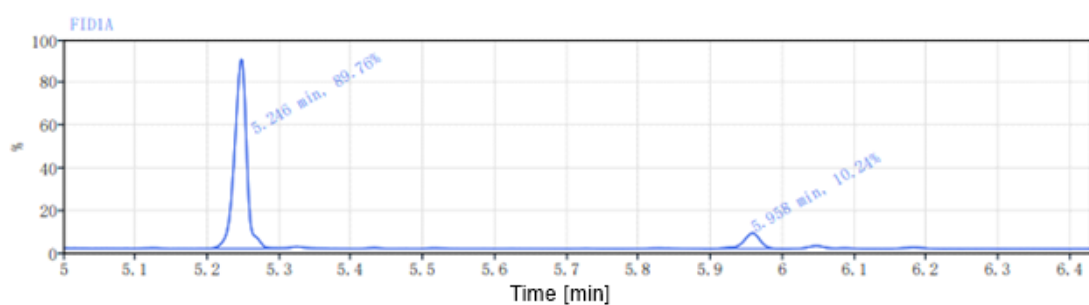

| RetTime | Signal | Width (min) | Area | Height | Area% |
|---------|--------|-------------|------|--------|-------|
| 5.246   | FID1A  | 0.116       | 37.6 | 31.7   | 89.76 |
| 5.958   | FID1A  | 0.120       | 4.3  | 2.6    | 10.24 |

**Supplementary Fig. 26.** GC spectra of compound (*S*)-**3i**, Related to Figure 5a.

### Spectroscopic Data (NMR Spectrum)

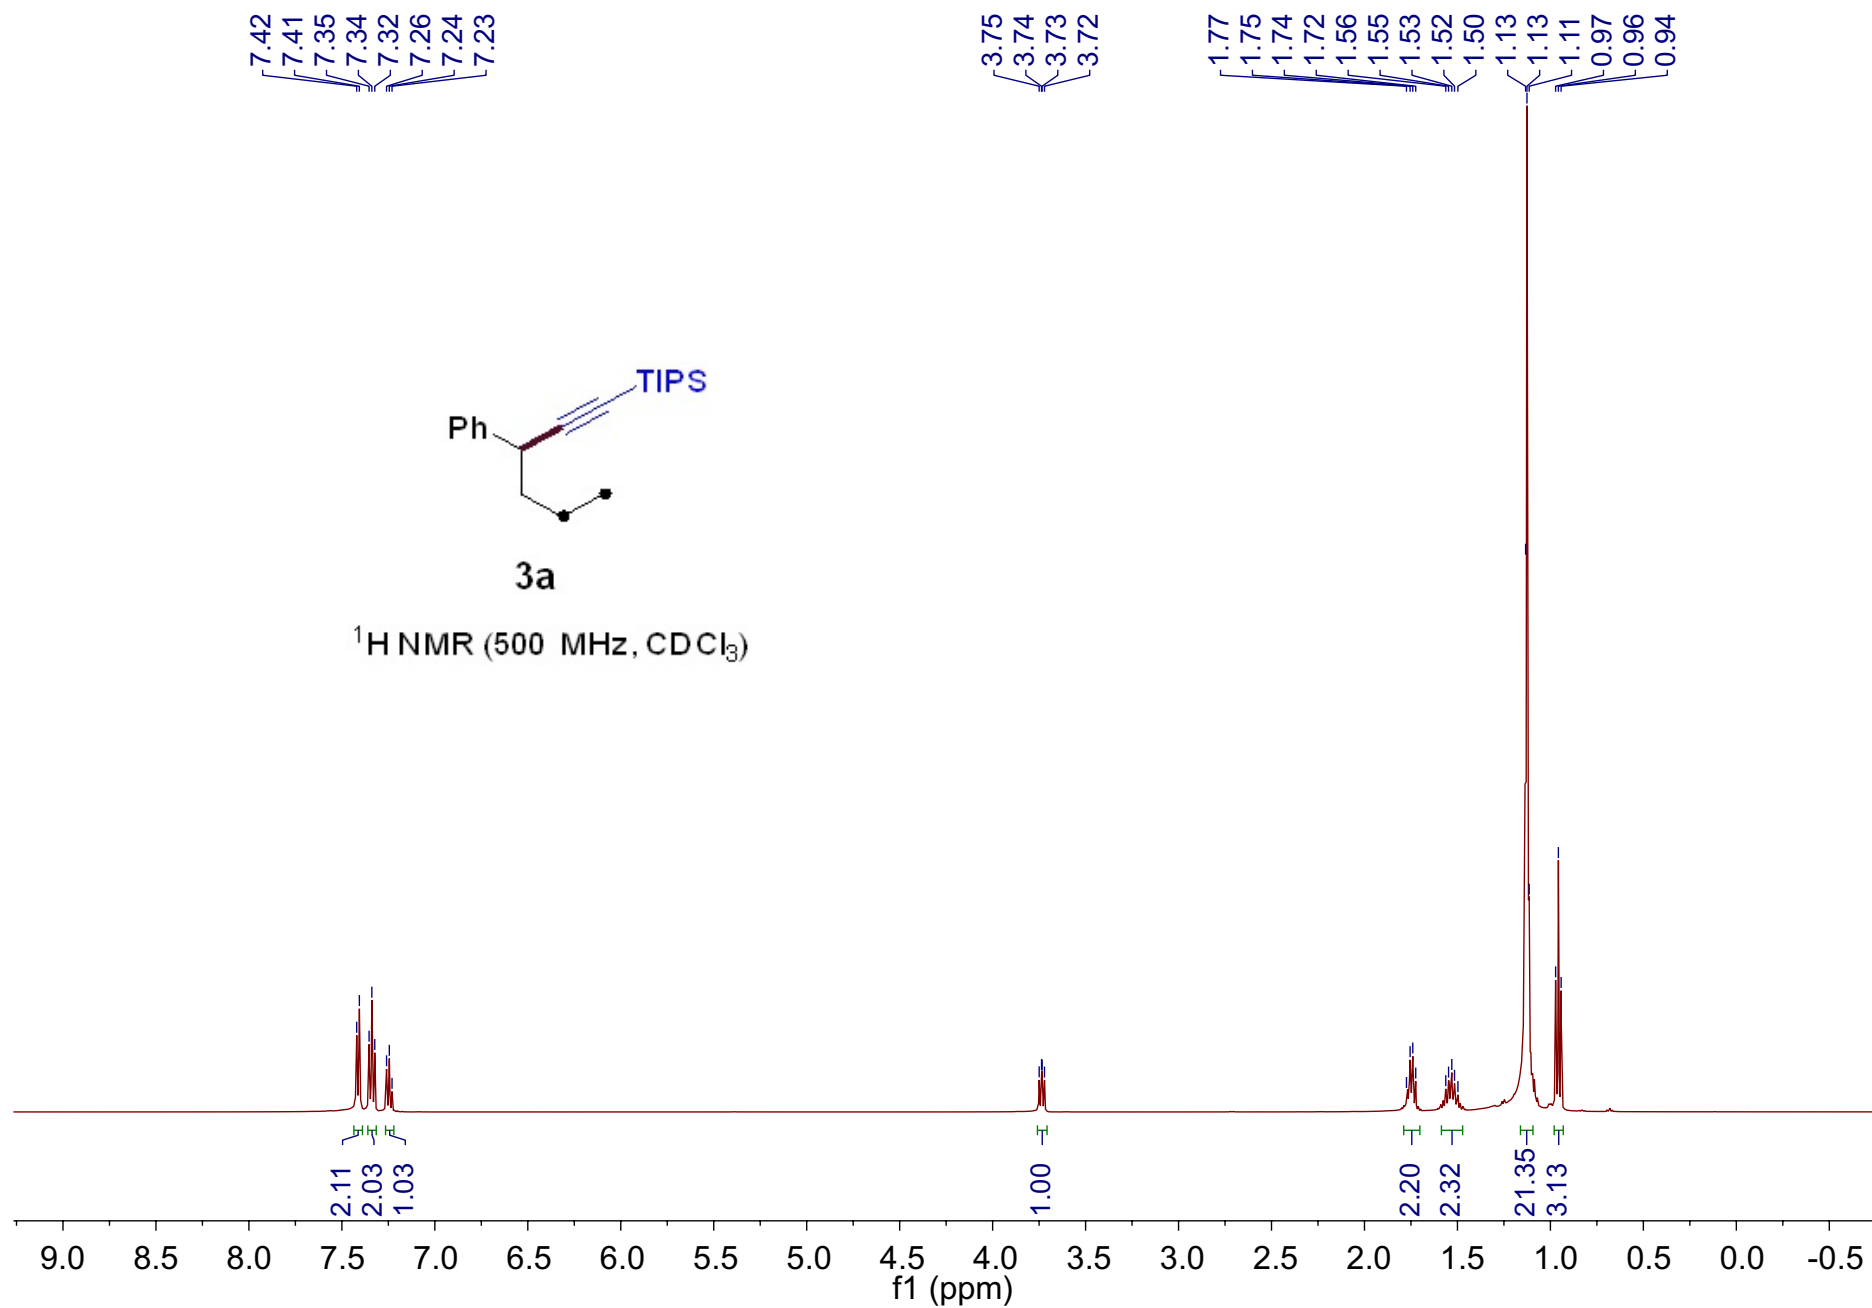

Supplementary Fig. 27. <sup>1</sup>H NMR (500 MHz, CDCl<sub>3</sub>) spectra for compound **3a**

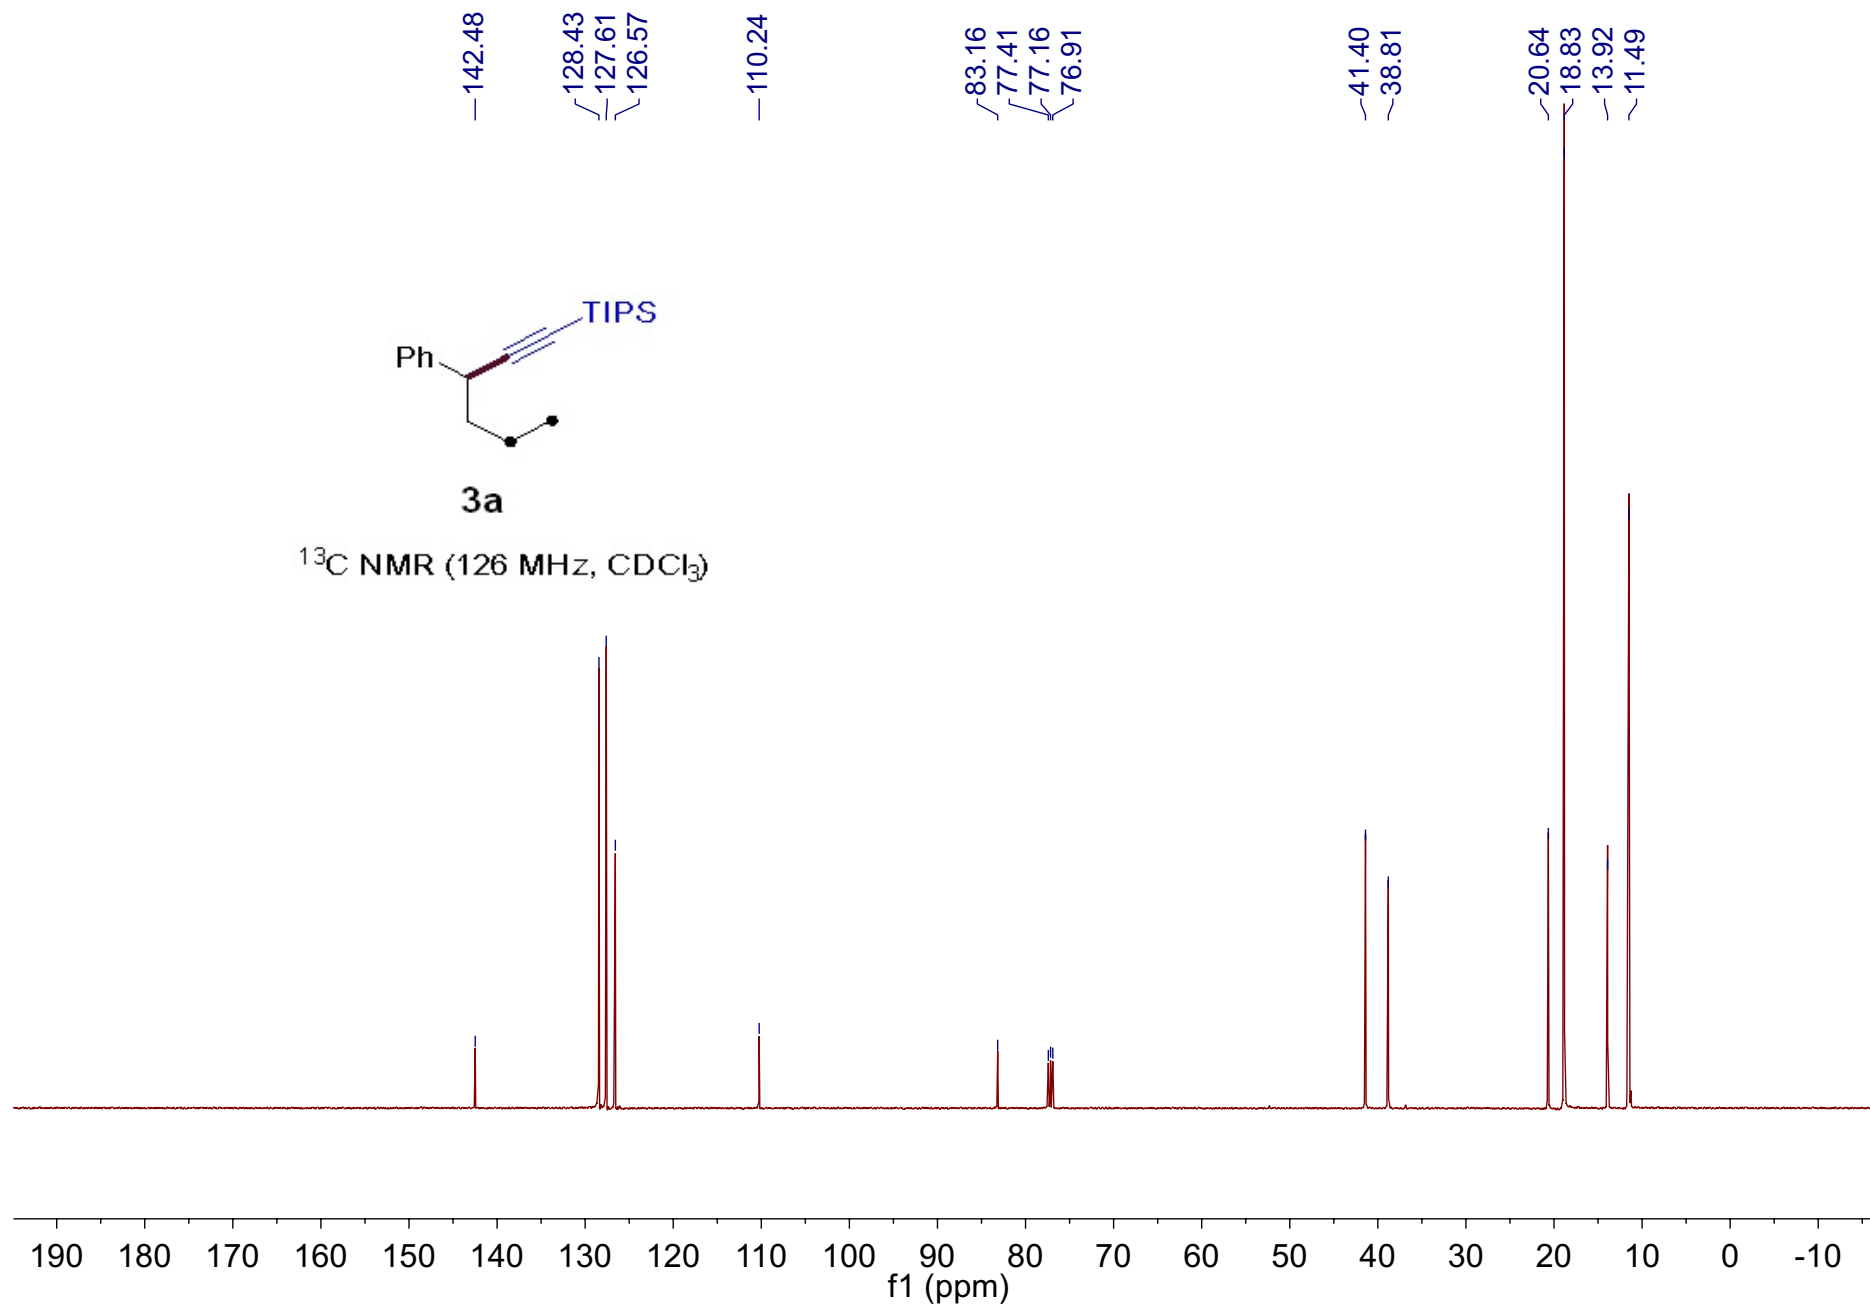

**Supplementary Fig. 28.**  $^{13}\text{C}$  NMR (126 MHz,  $\text{CDCl}_3$ ) spectra for compound **3a**



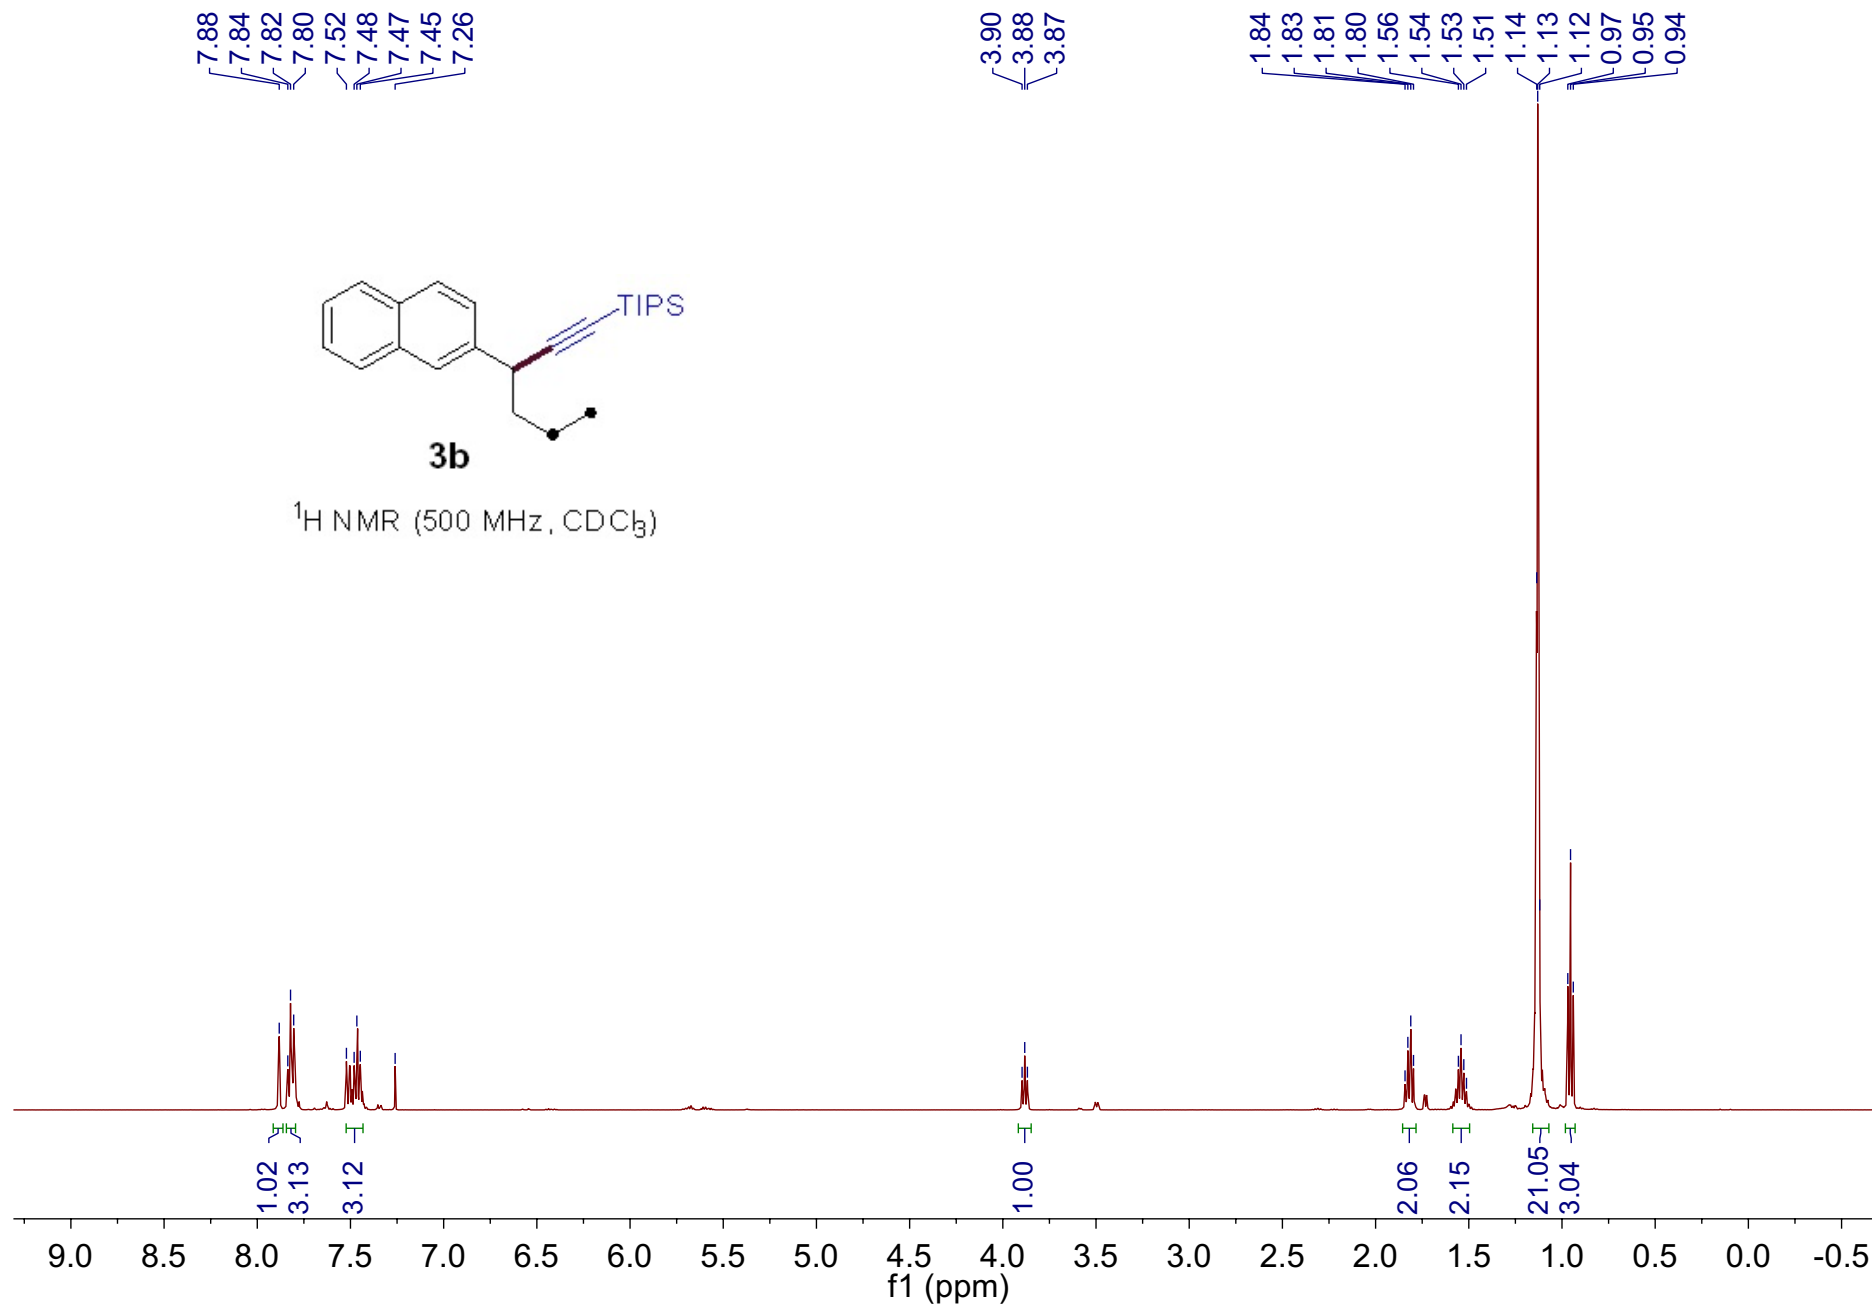

Supplementary Fig. 29.  $^1\text{H}$  NMR (500 MHz,  $\text{CDCl}_3$ ) spectra for compound **3b**

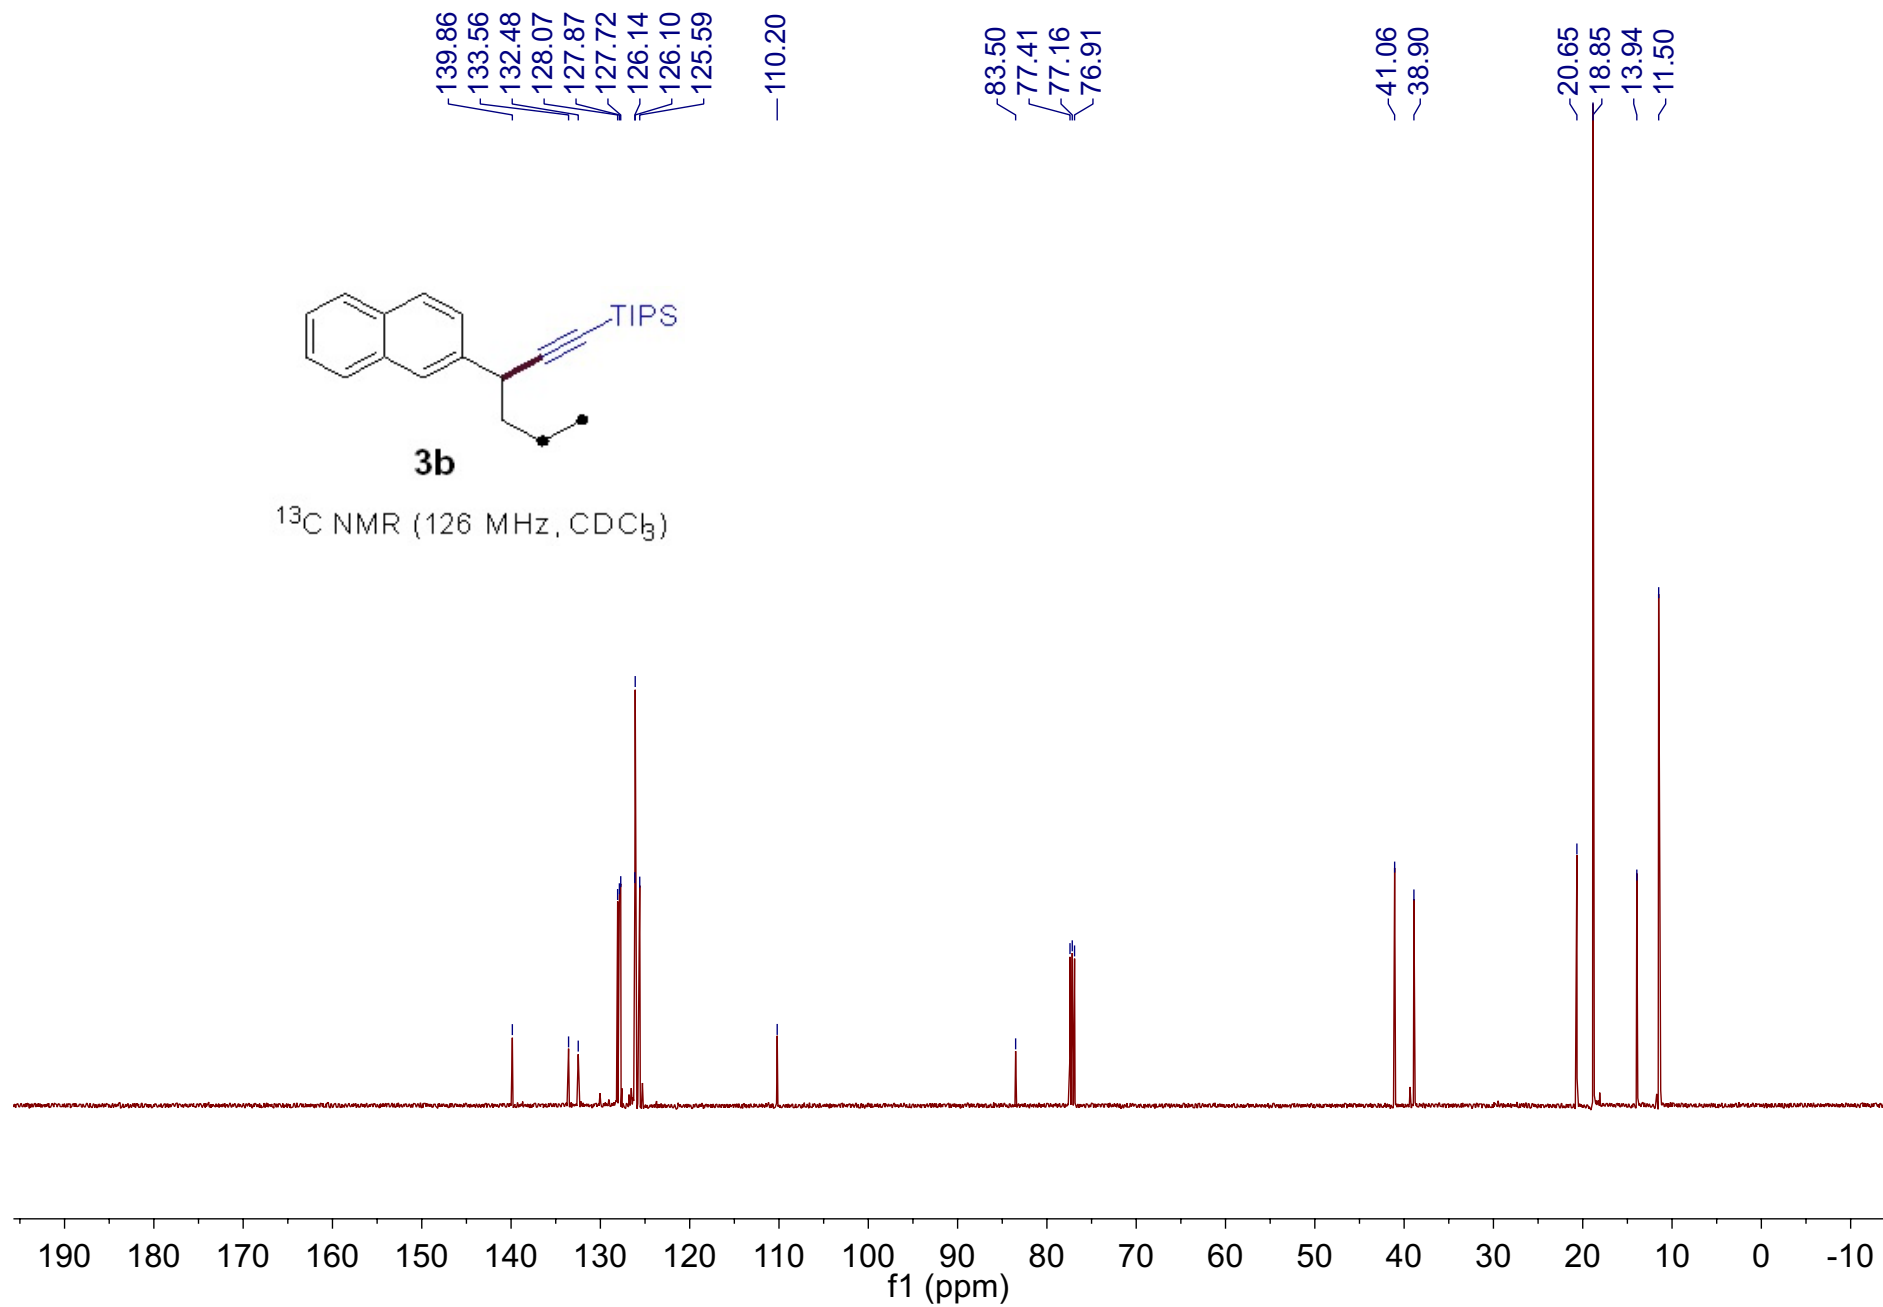

**Supplementary Fig. 30.**  $^{13}\text{C}$  NMR (126 MHz,  $\text{CDCl}_3$ ) spectra for compound **3b**

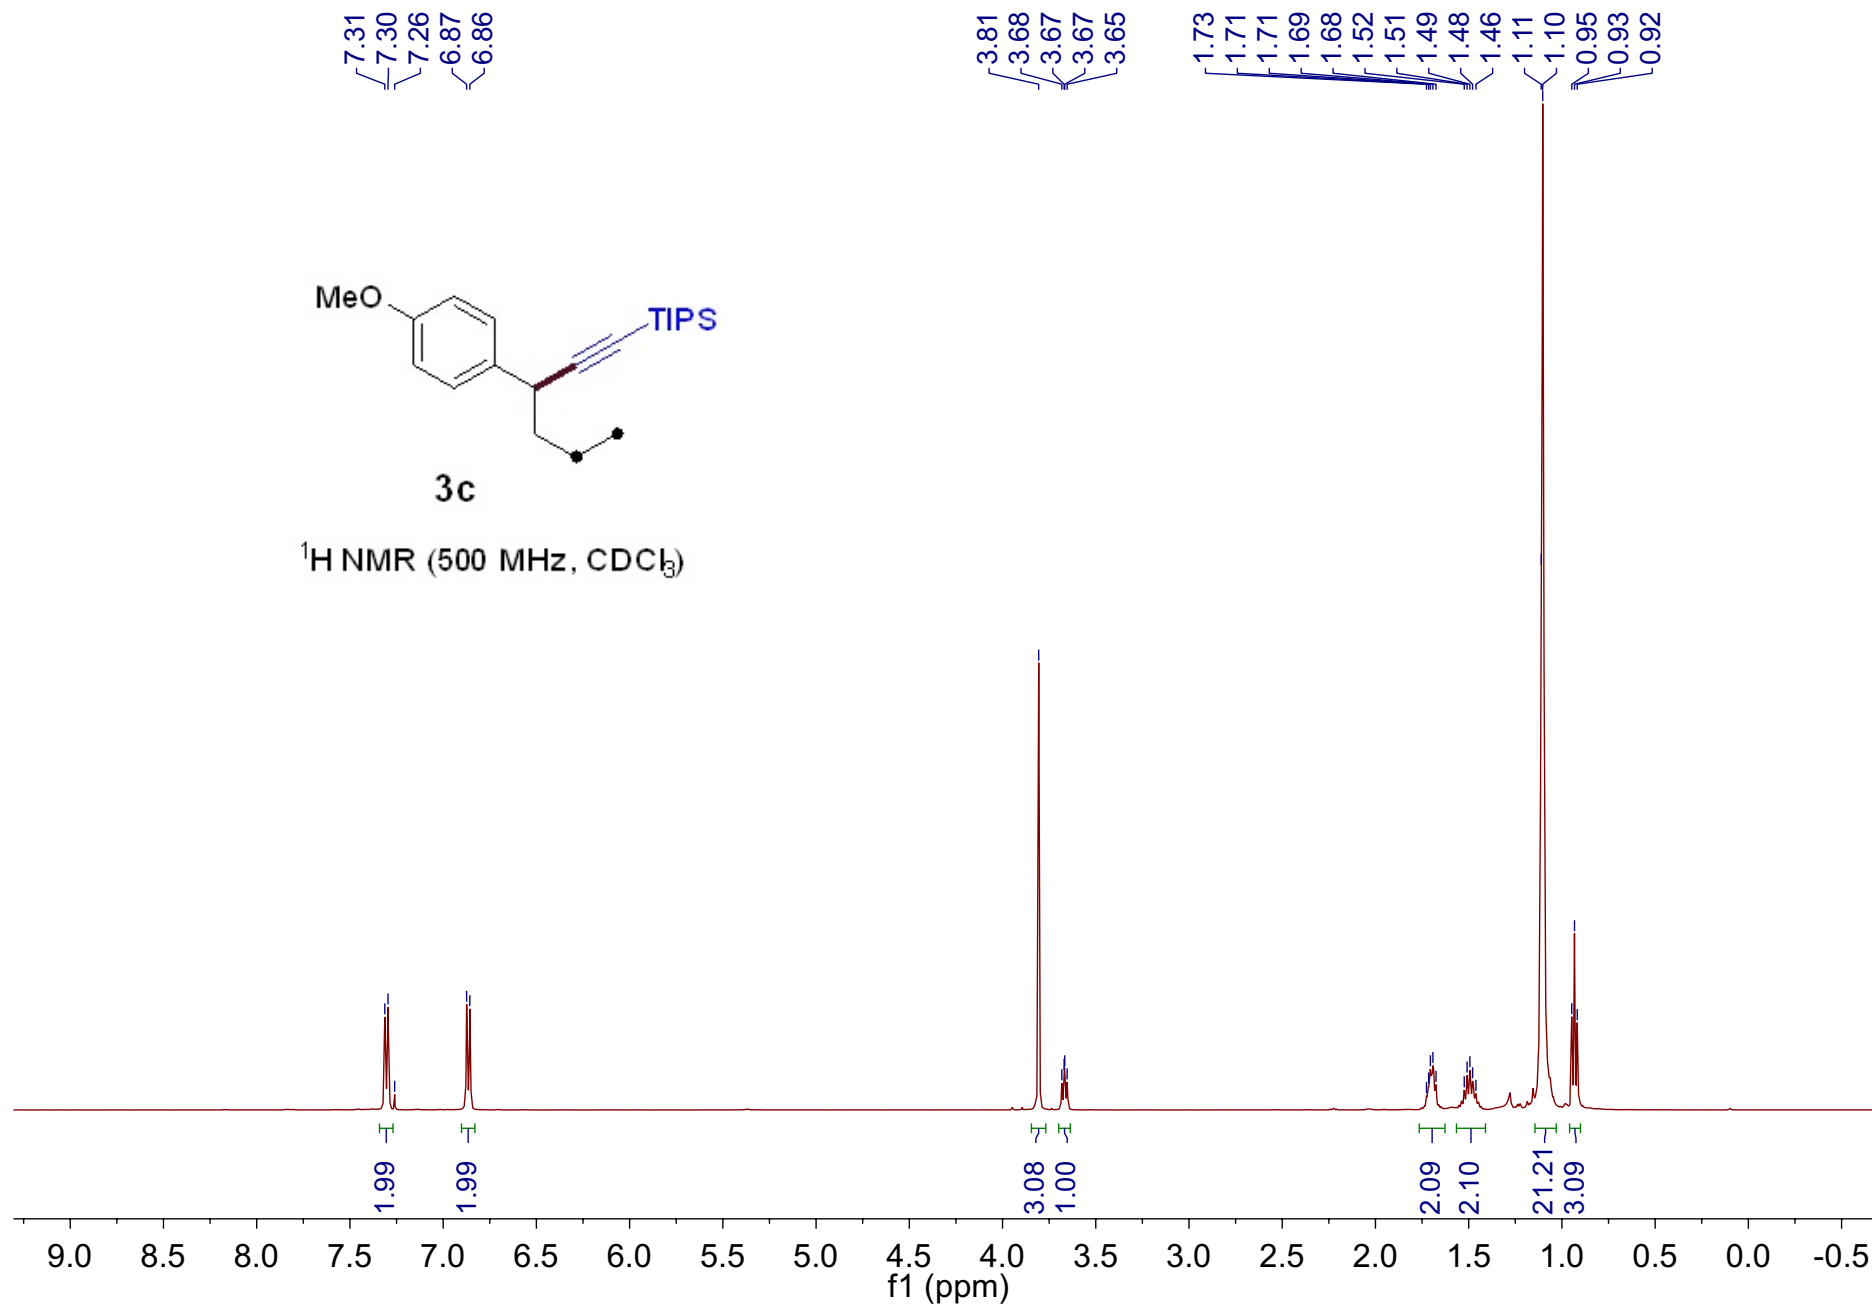

**Supplementary Fig. 31.**  $^1\text{H NMR}$  (500 MHz,  $\text{CDCl}_3$ ) spectra for compound **3c**

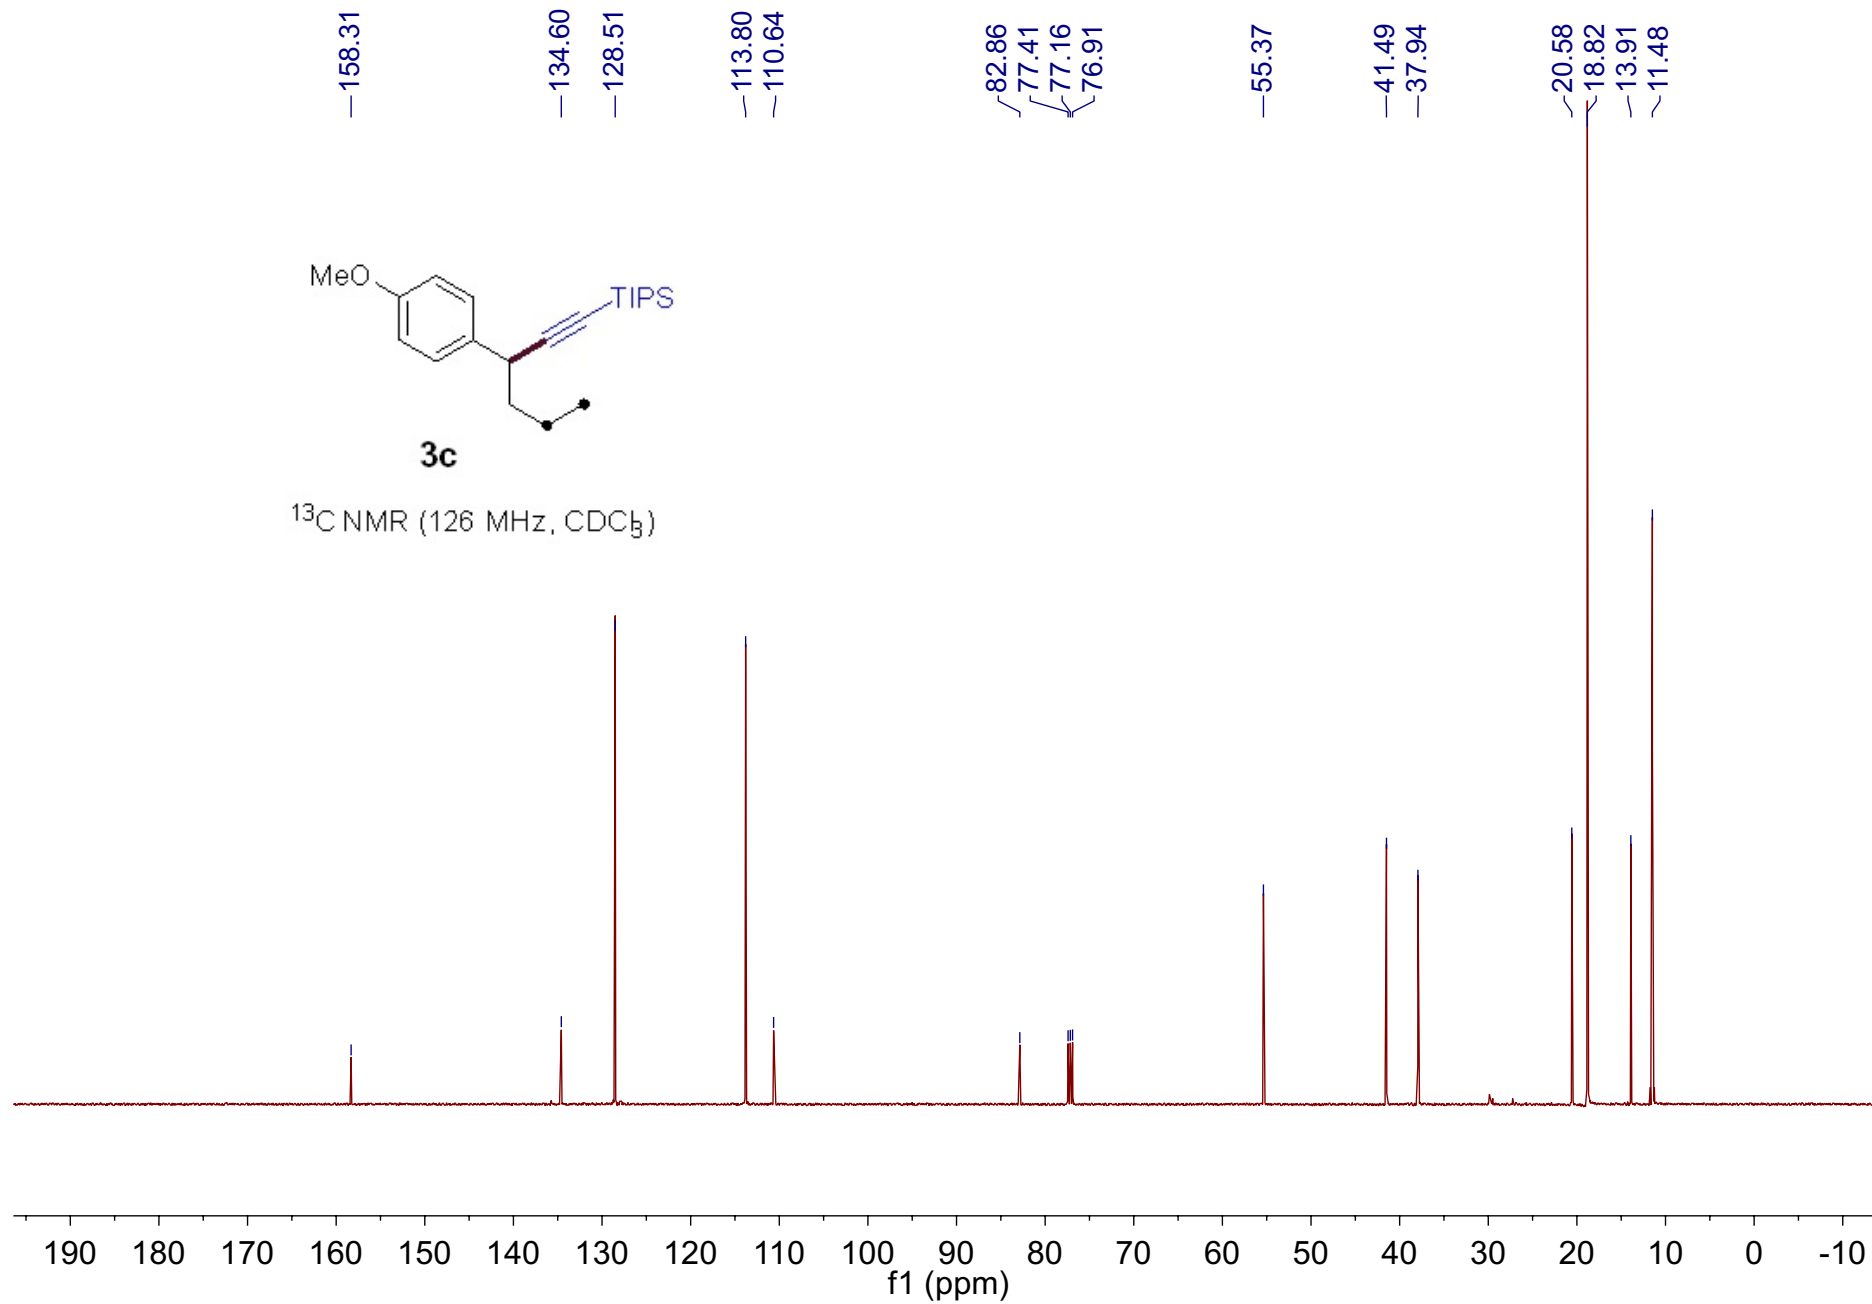

**Supplementary Fig. 32.**  $^{13}\text{C}$  NMR (126 MHz,  $\text{CDCl}_3$ ) spectra for compound **3c**

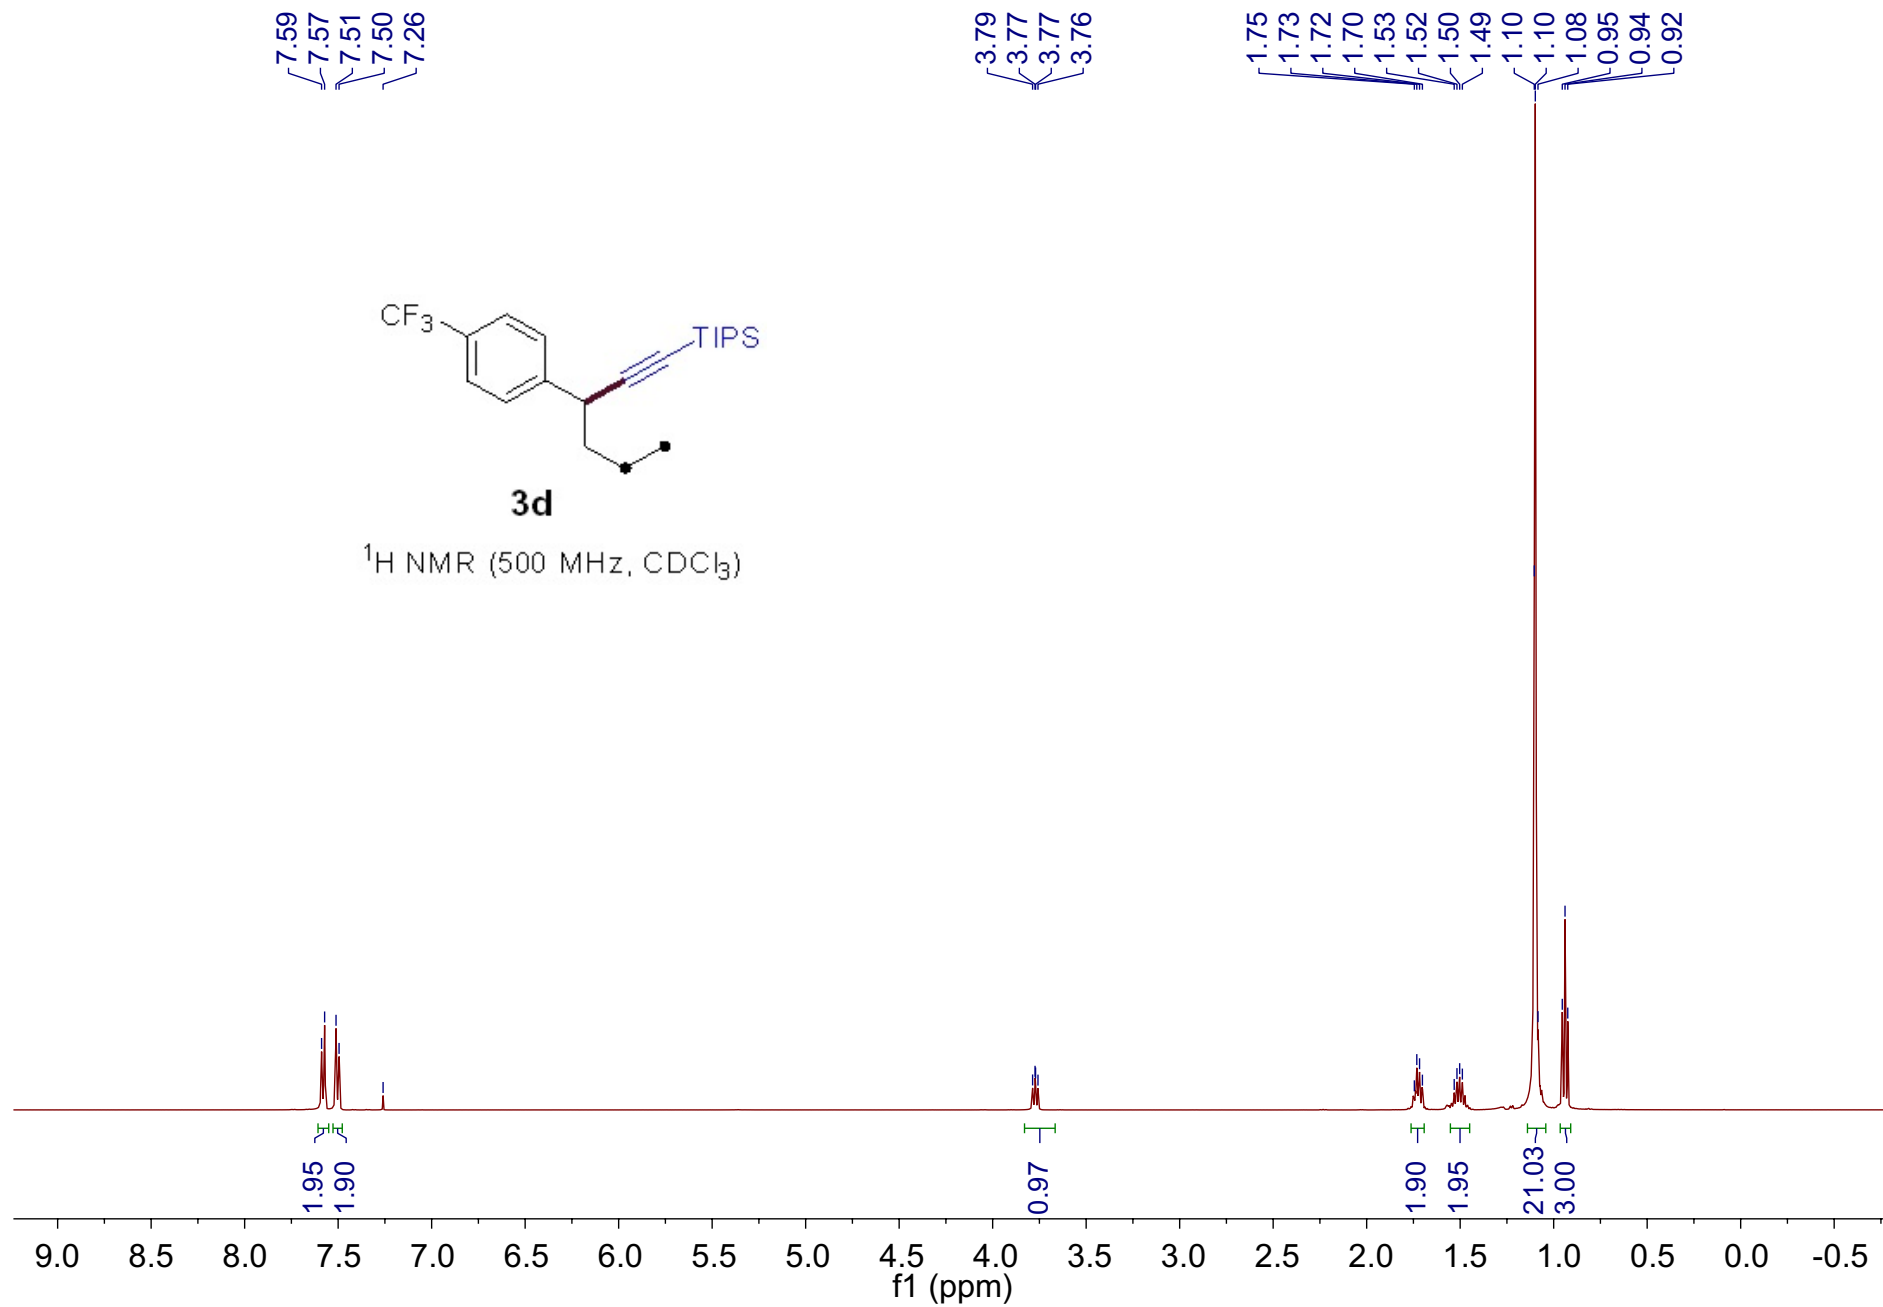

Supplementary Fig. 33.  $^1\text{H NMR}$  (500 MHz,  $\text{CDCl}_3$ ) spectra for compound **3d**

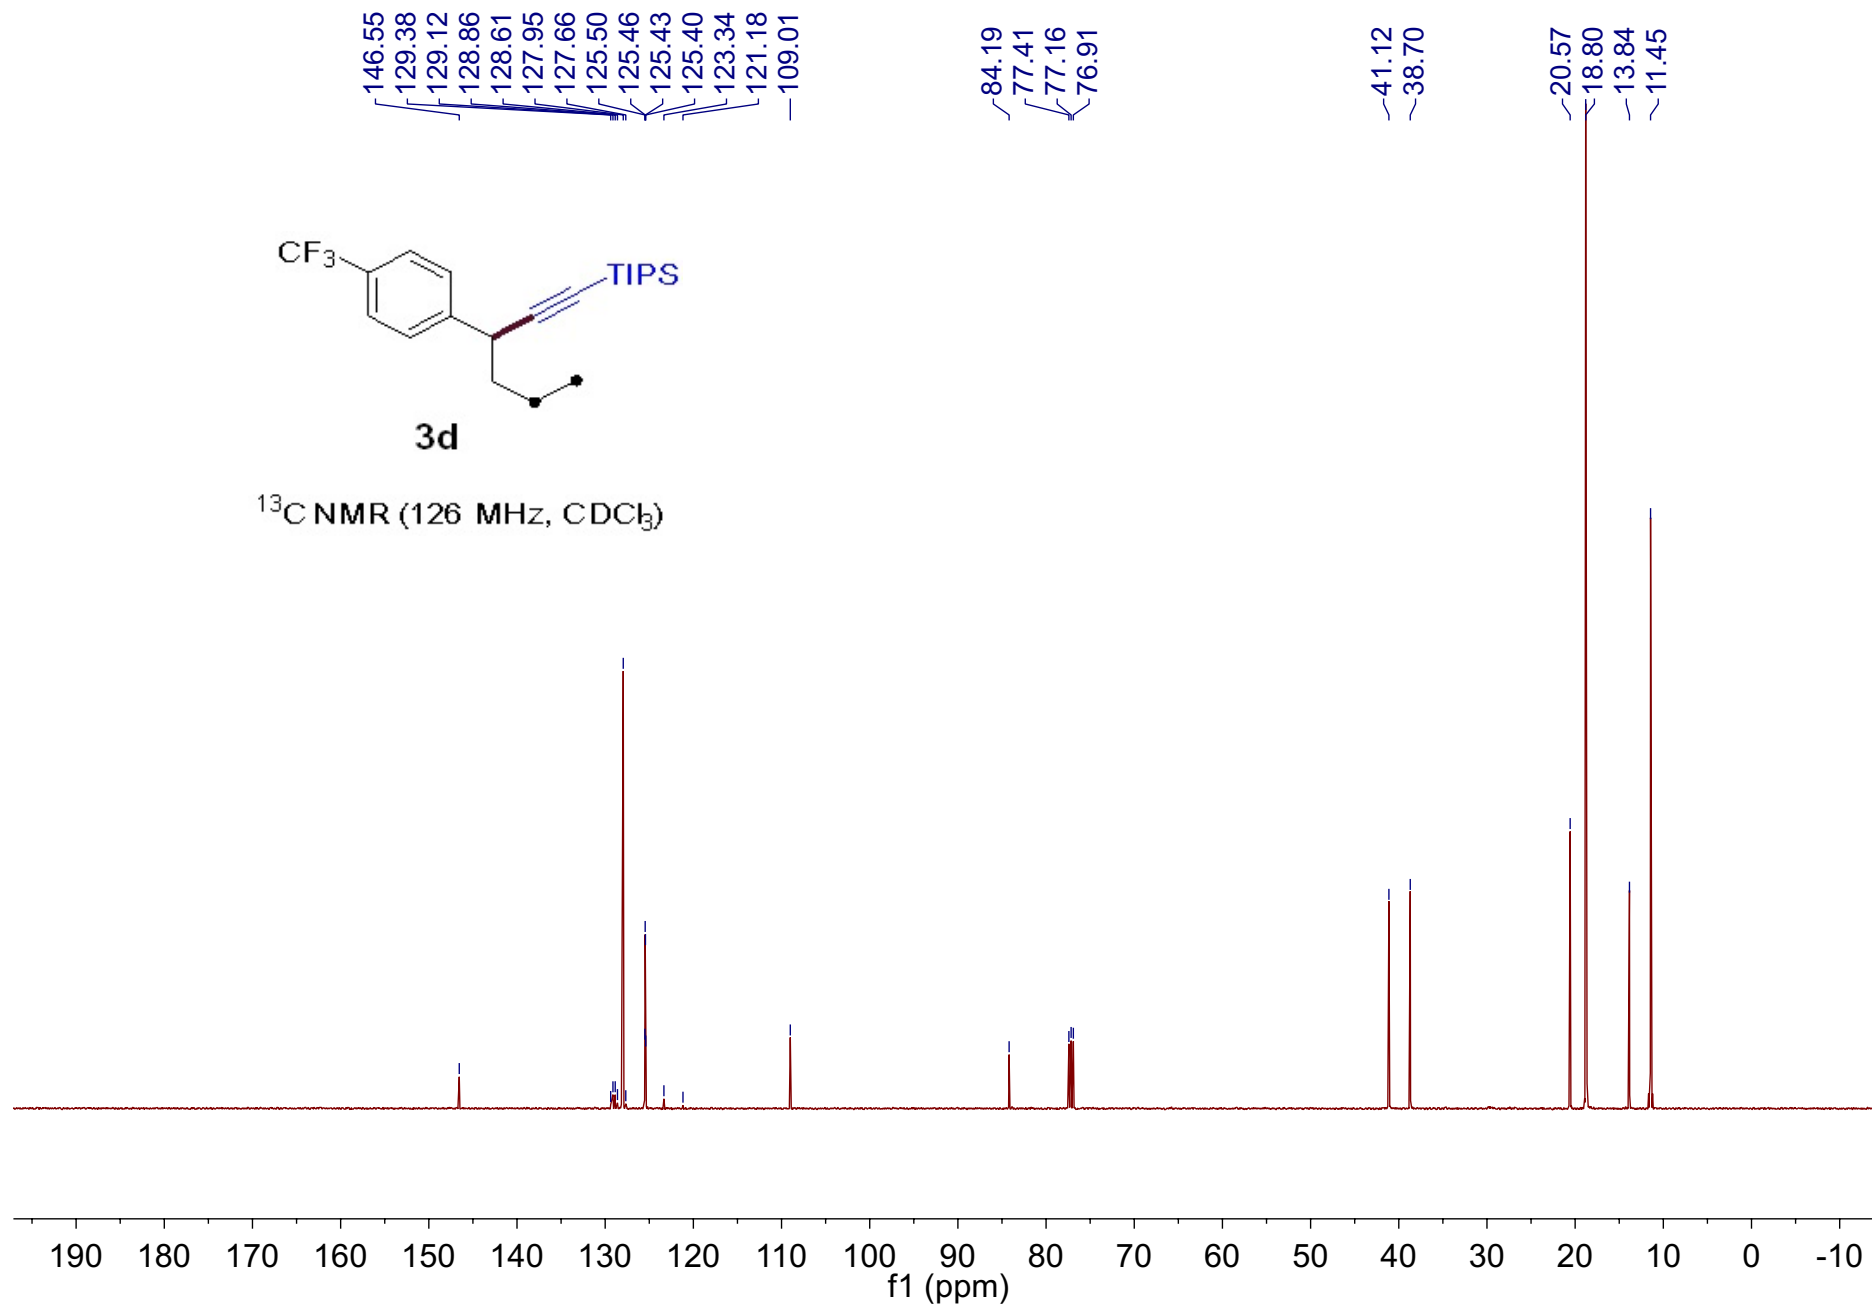

**Supplementary Fig. 34.**  $^{13}\text{C}$  NMR (126 MHz,  $\text{CDCl}_3$ ) spectra for compound **3d**

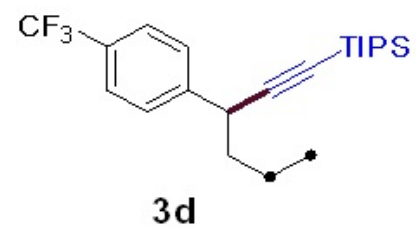

<sup>19</sup>F NMR (471 MHz, CDCl<sub>3</sub>)

-62.35

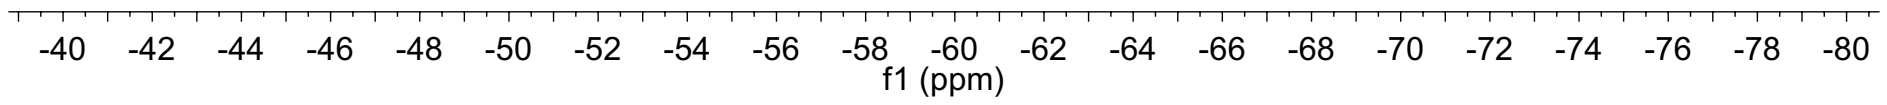

**Supplementary Fig. 35.** <sup>19</sup>F NMR (471 MHz, CDCl<sub>3</sub>) spectra for compound **3d**

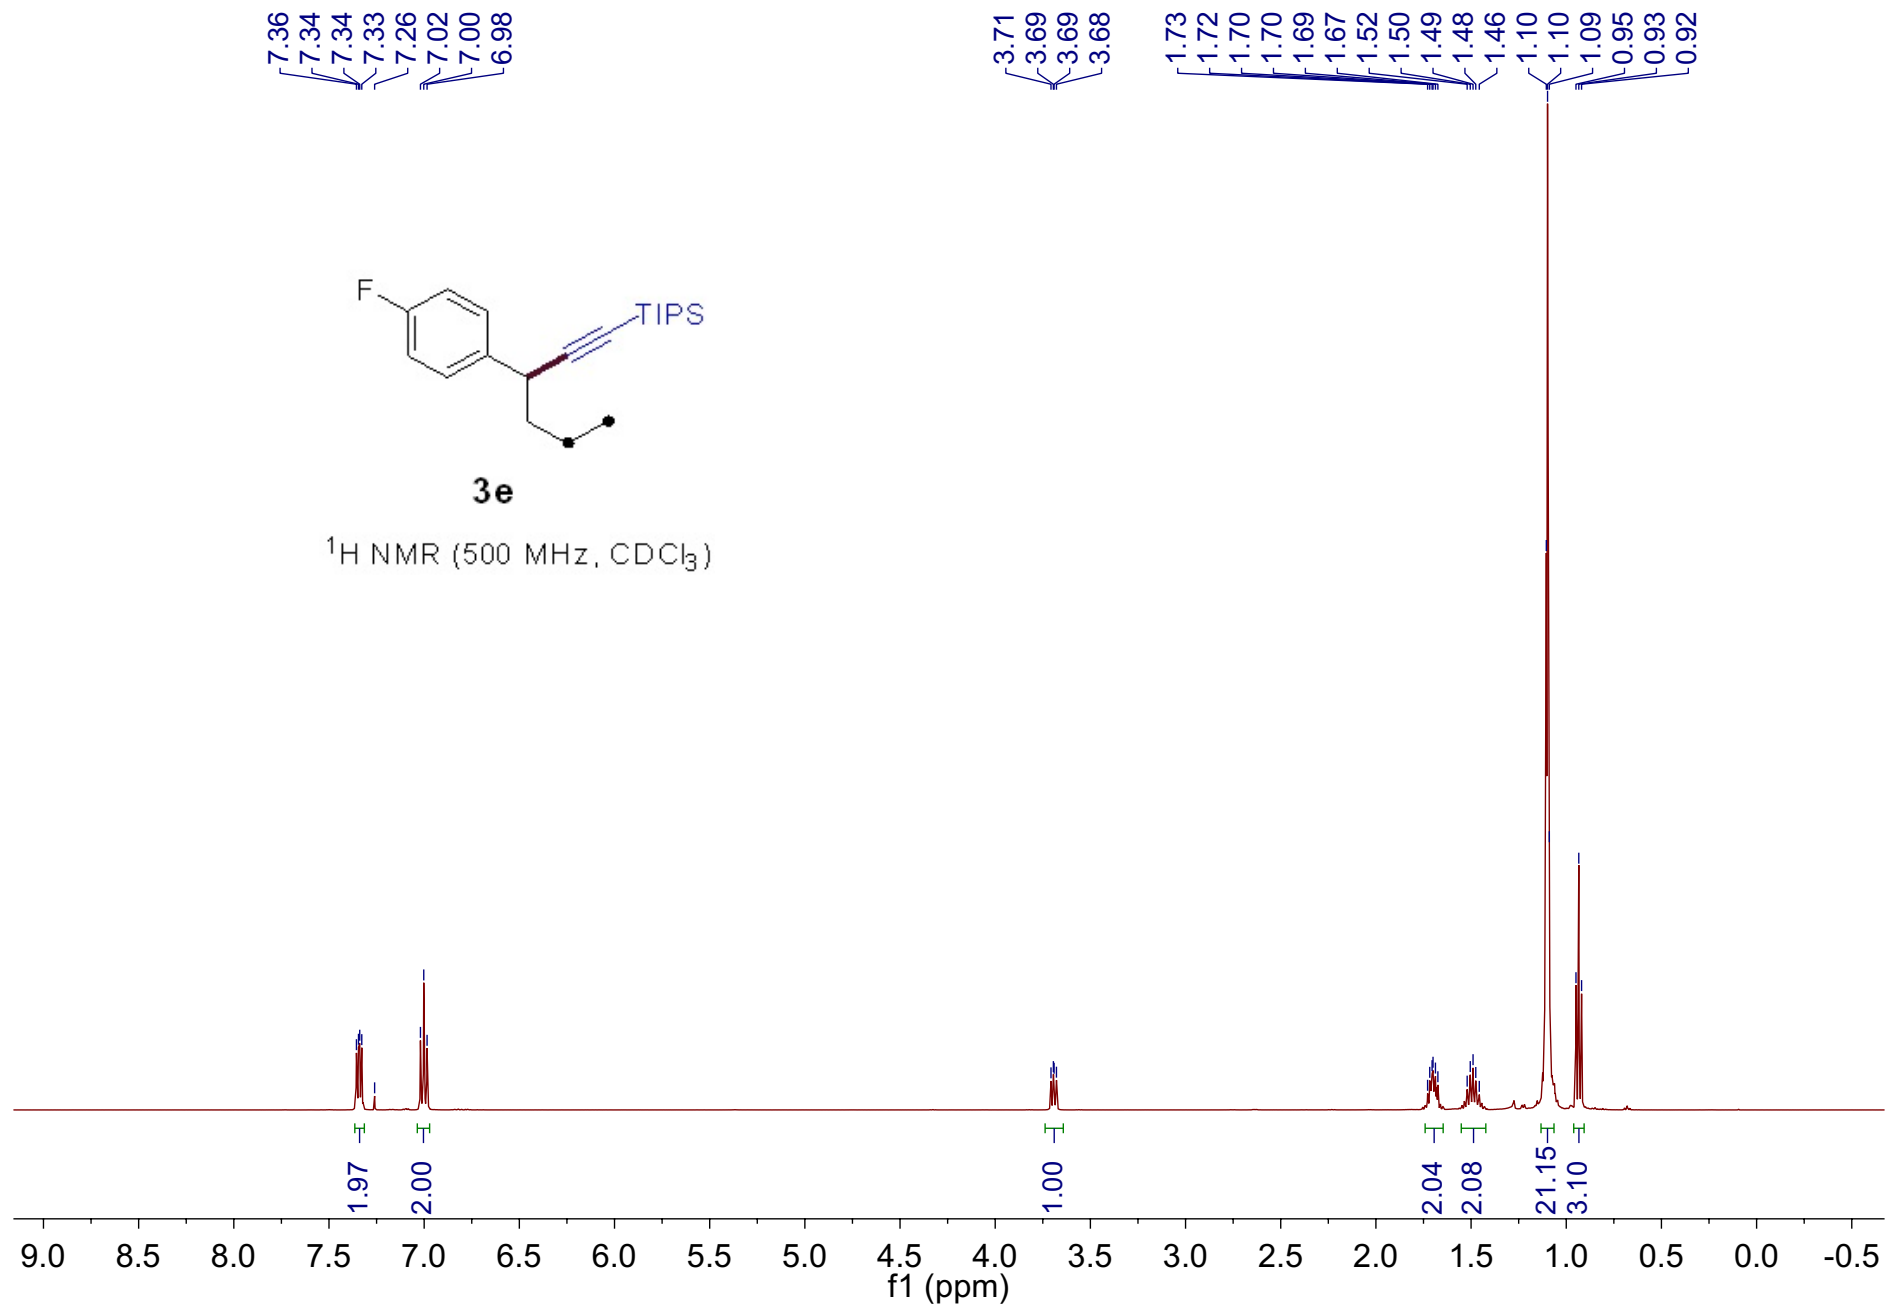

**Supplementary Fig. 36.**  $^1\text{H NMR}$  (500 MHz,  $\text{CDCl}_3$ ) spectra for compound **3e**



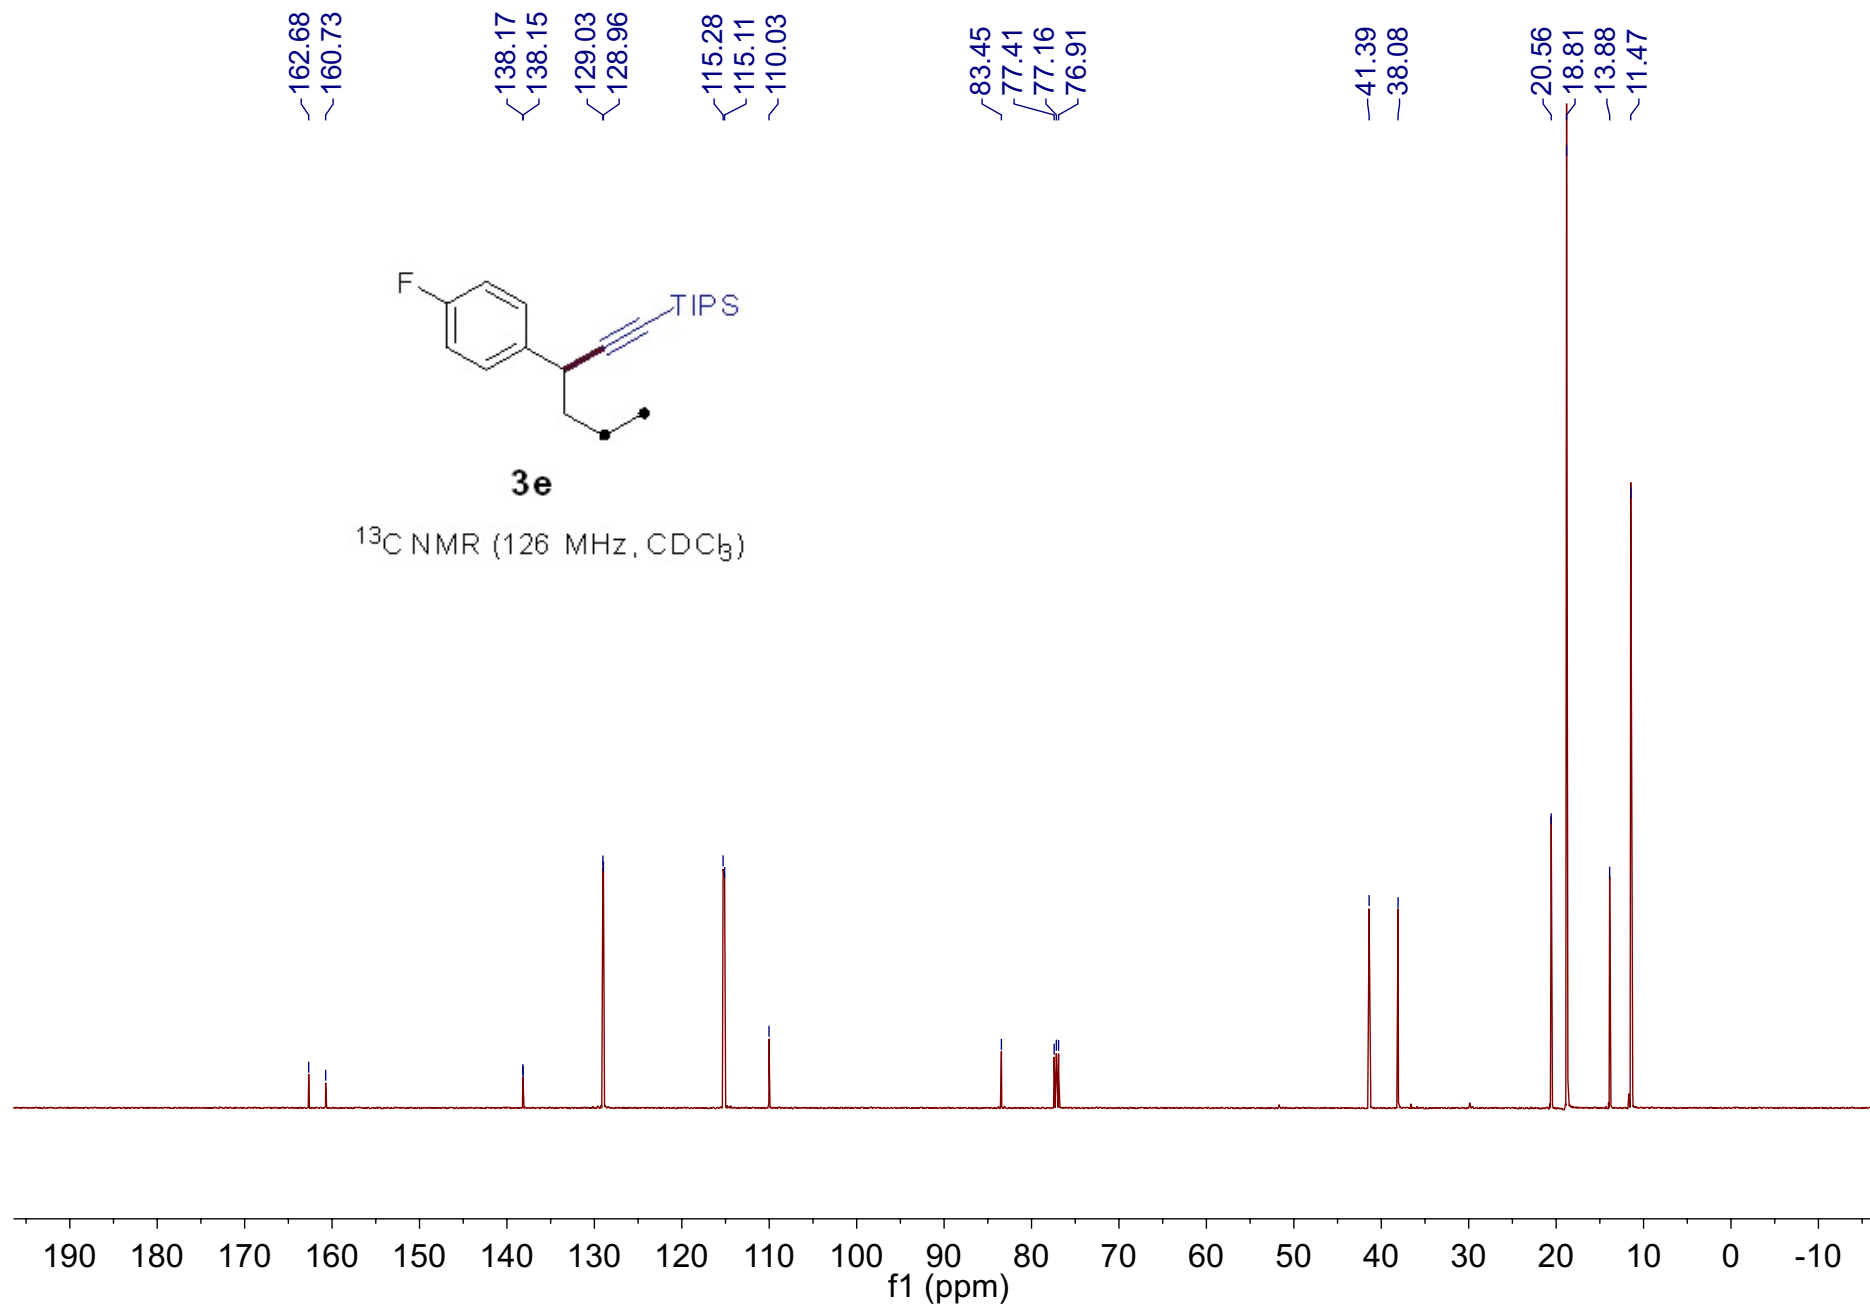

**Supplementary Fig. 37.** <sup>13</sup>C NMR (126 MHz, CDCl<sub>3</sub>) spectra for compound **3e**

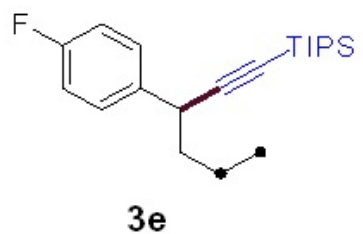

$^{19}\text{F}$  NMR (471 MHz,  $\text{CDCl}_3$ )

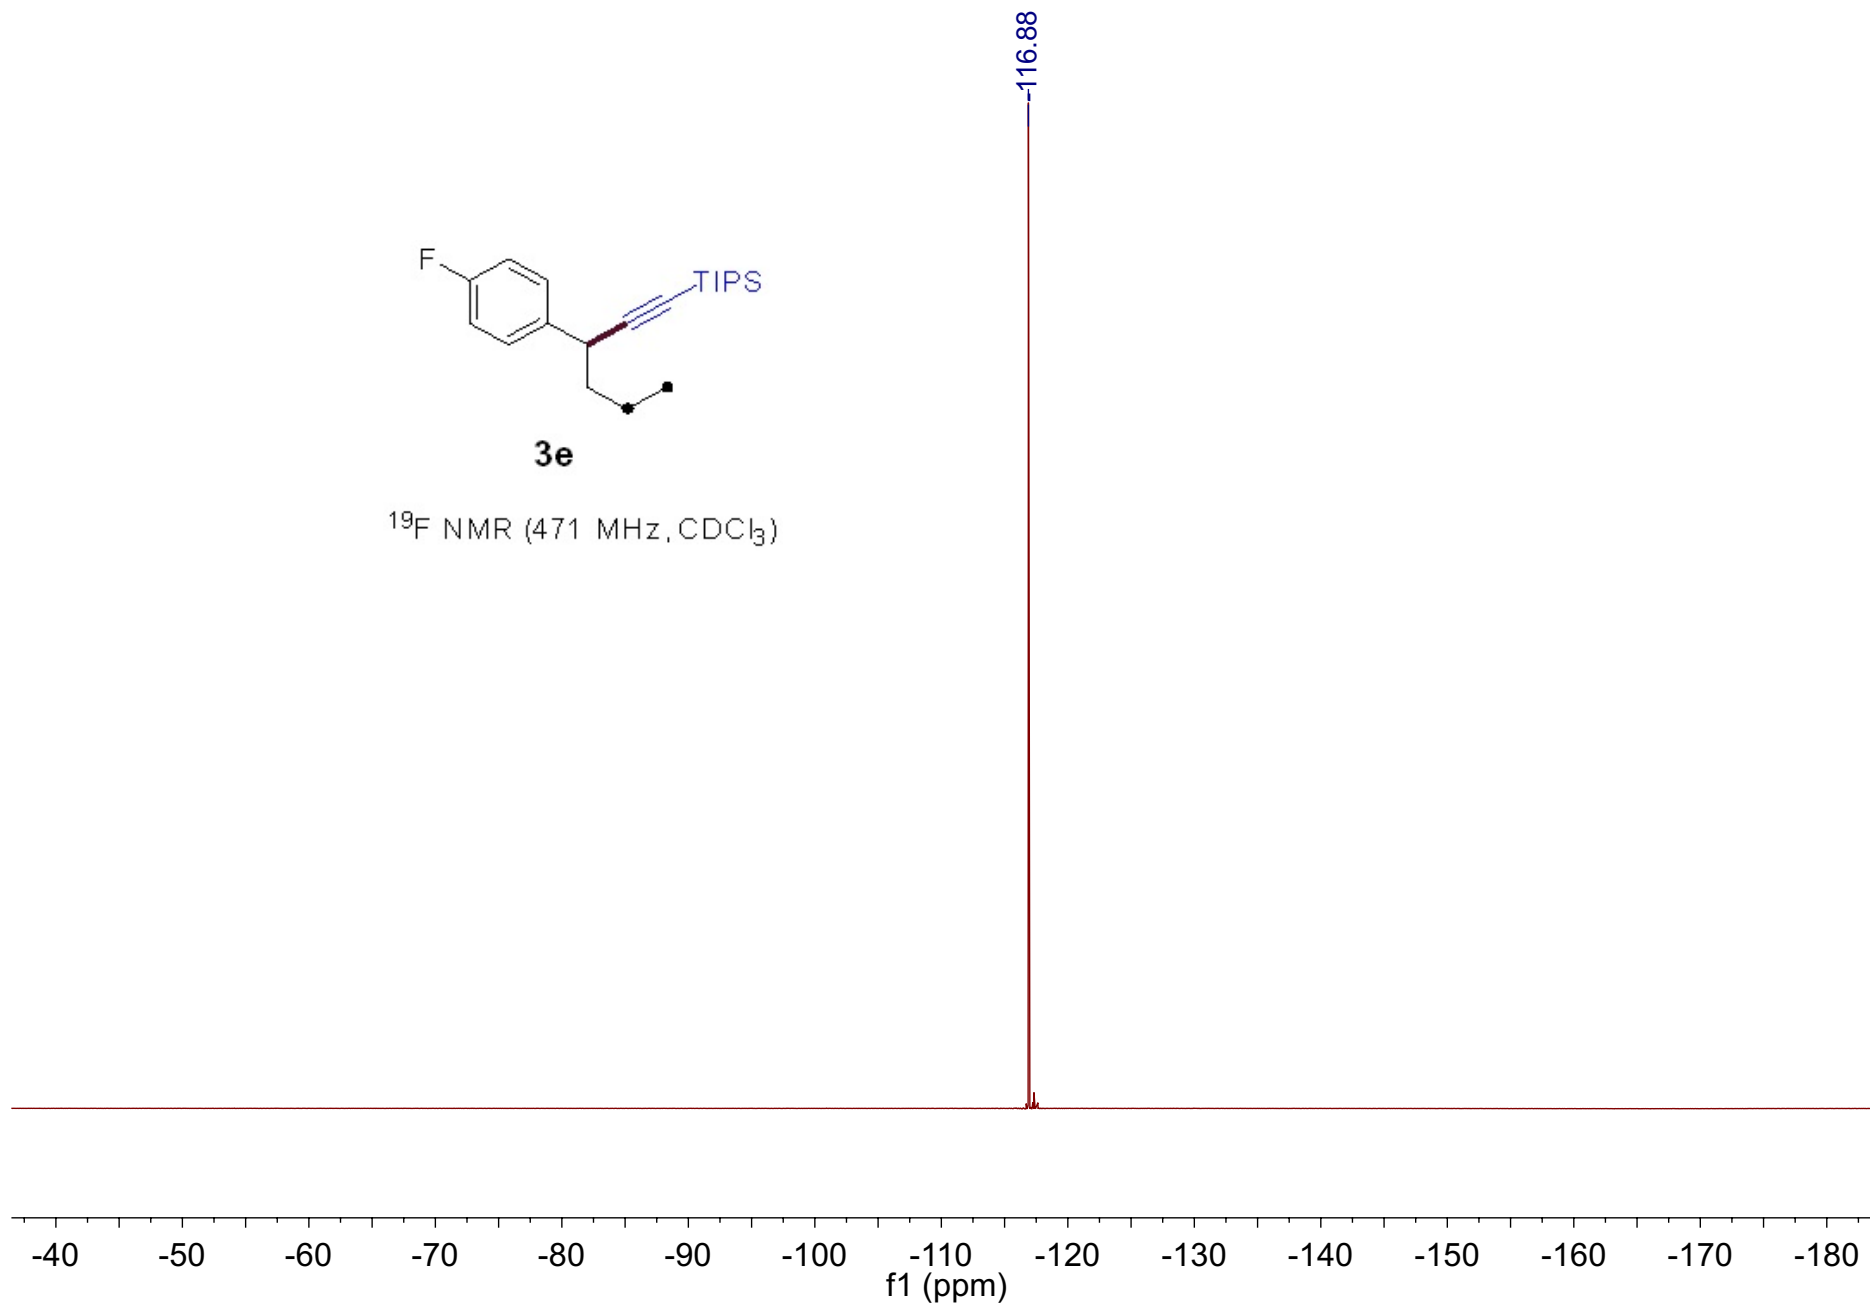

**Supplementary Fig. 38.**  $^{19}\text{F}$  NMR (471 MHz,  $\text{CDCl}_3$ ) spectra for compound **3e**

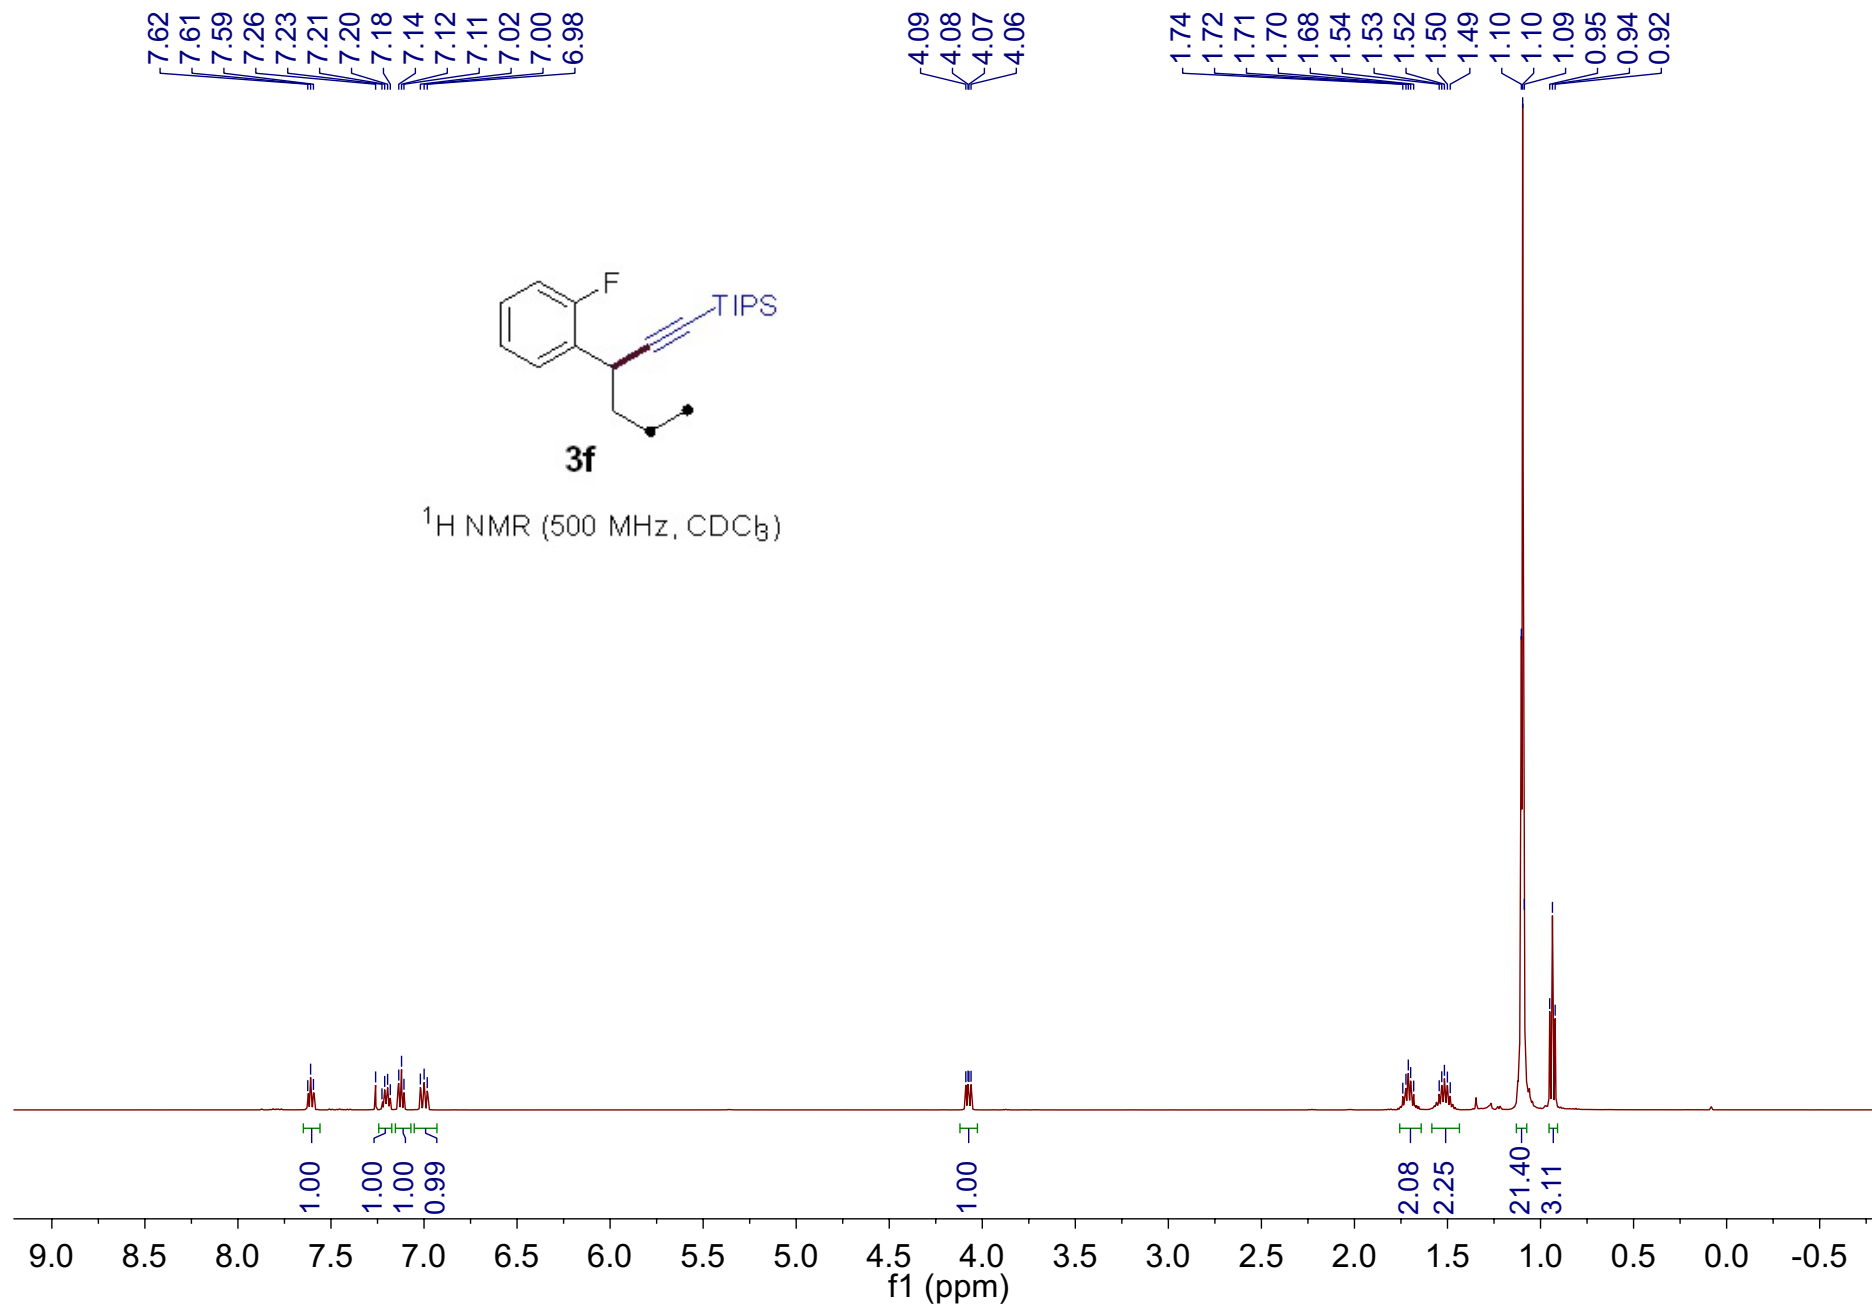

Supplementary Fig. 39.  $^1\text{H NMR}$  (500 MHz,  $\text{CDCl}_3$ ) spectra for compound **3f**

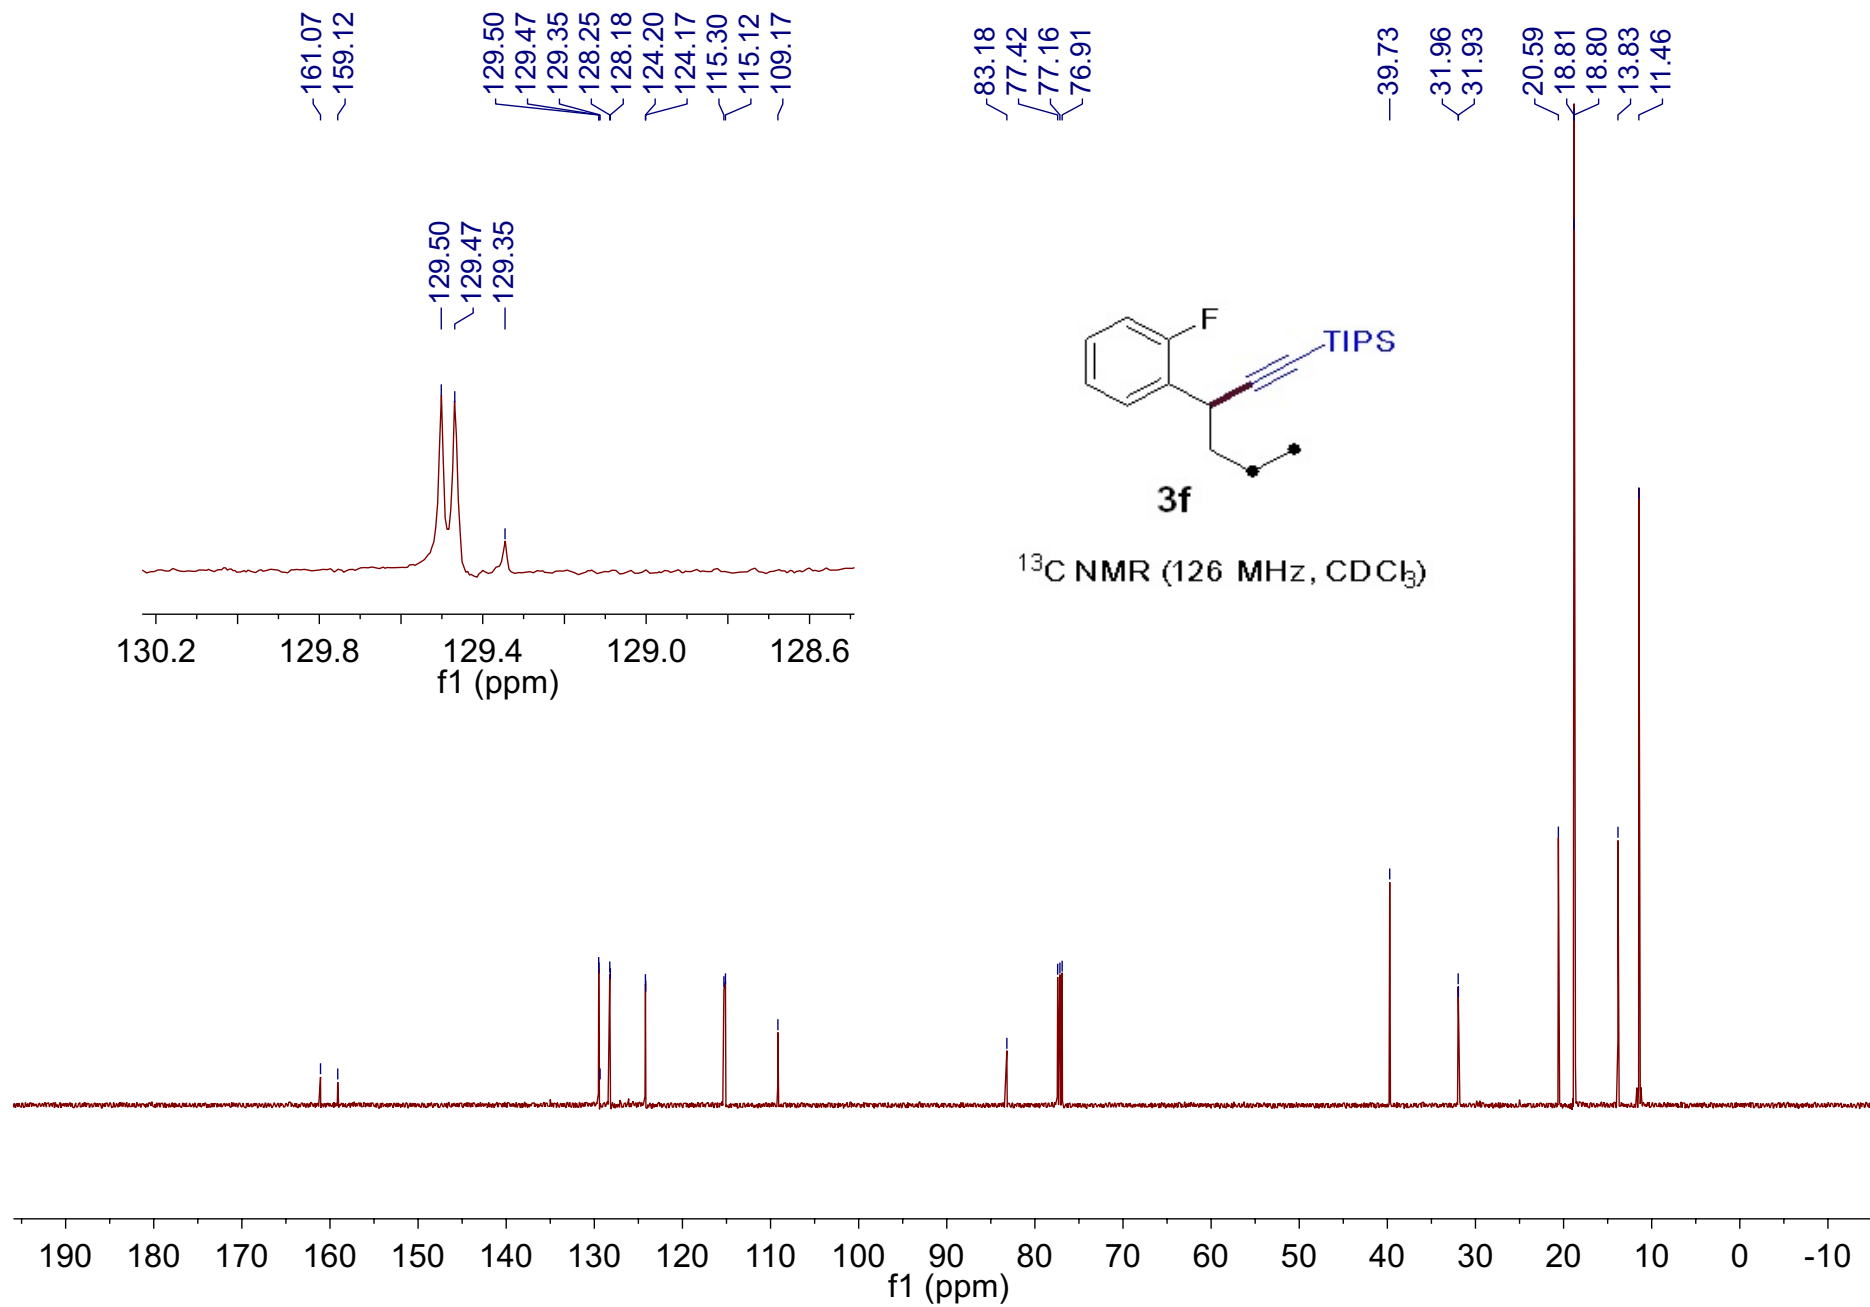

**Supplementary Fig. 40.**  $^{13}\text{C}$  NMR (126 MHz,  $\text{CDCl}_3$ ) spectra for compound **3f**

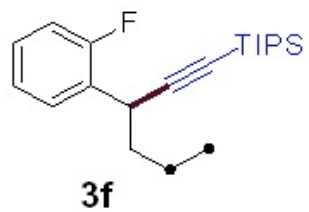

$^{19}\text{F}$  NMR (471 MHz,  $\text{CDCl}_3$ )

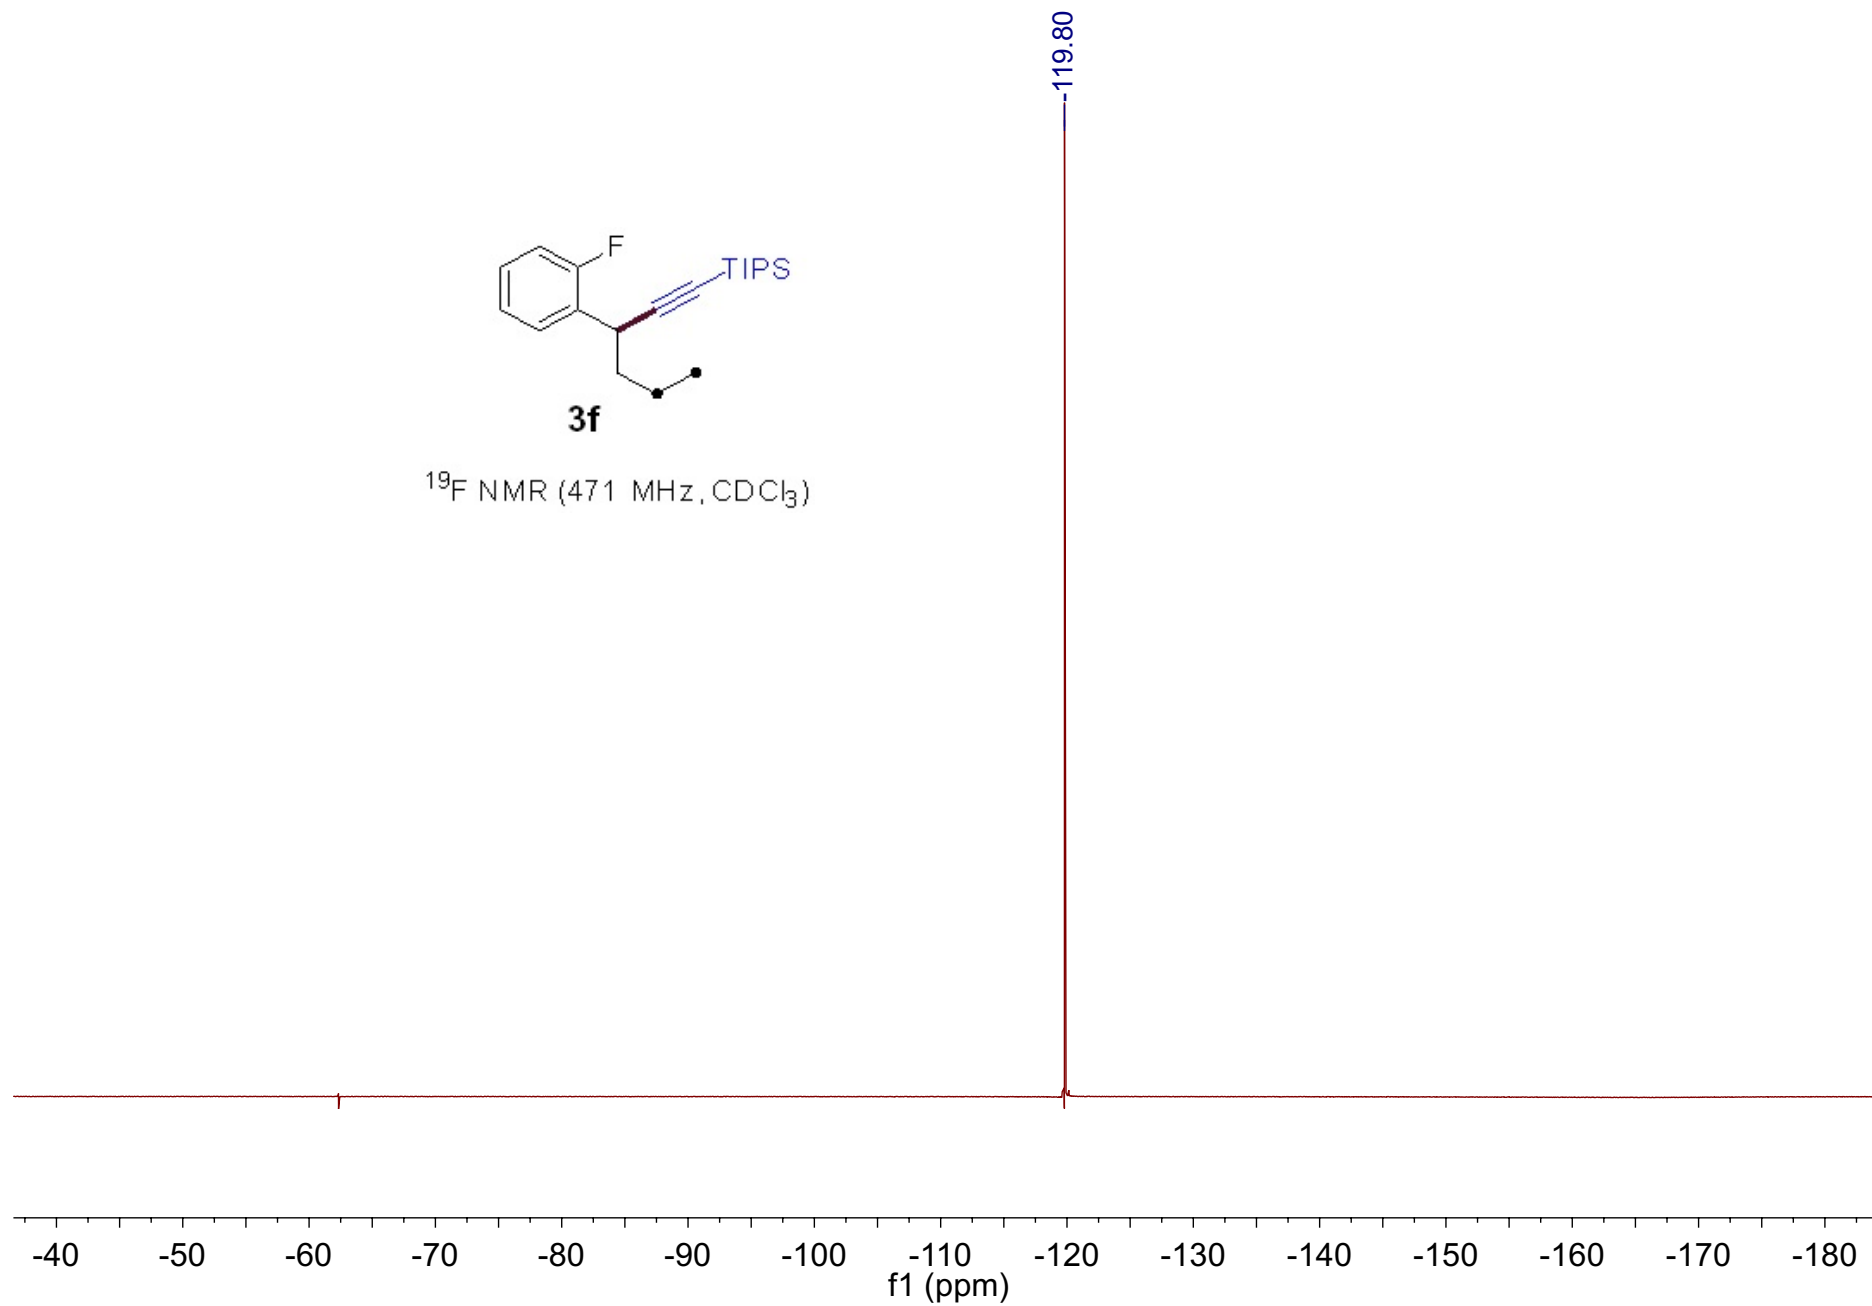

**Supplementary Fig. 41.**  $^{19}\text{F}$  NMR (471 MHz,  $\text{CDCl}_3$ ) spectra for compound **3f**

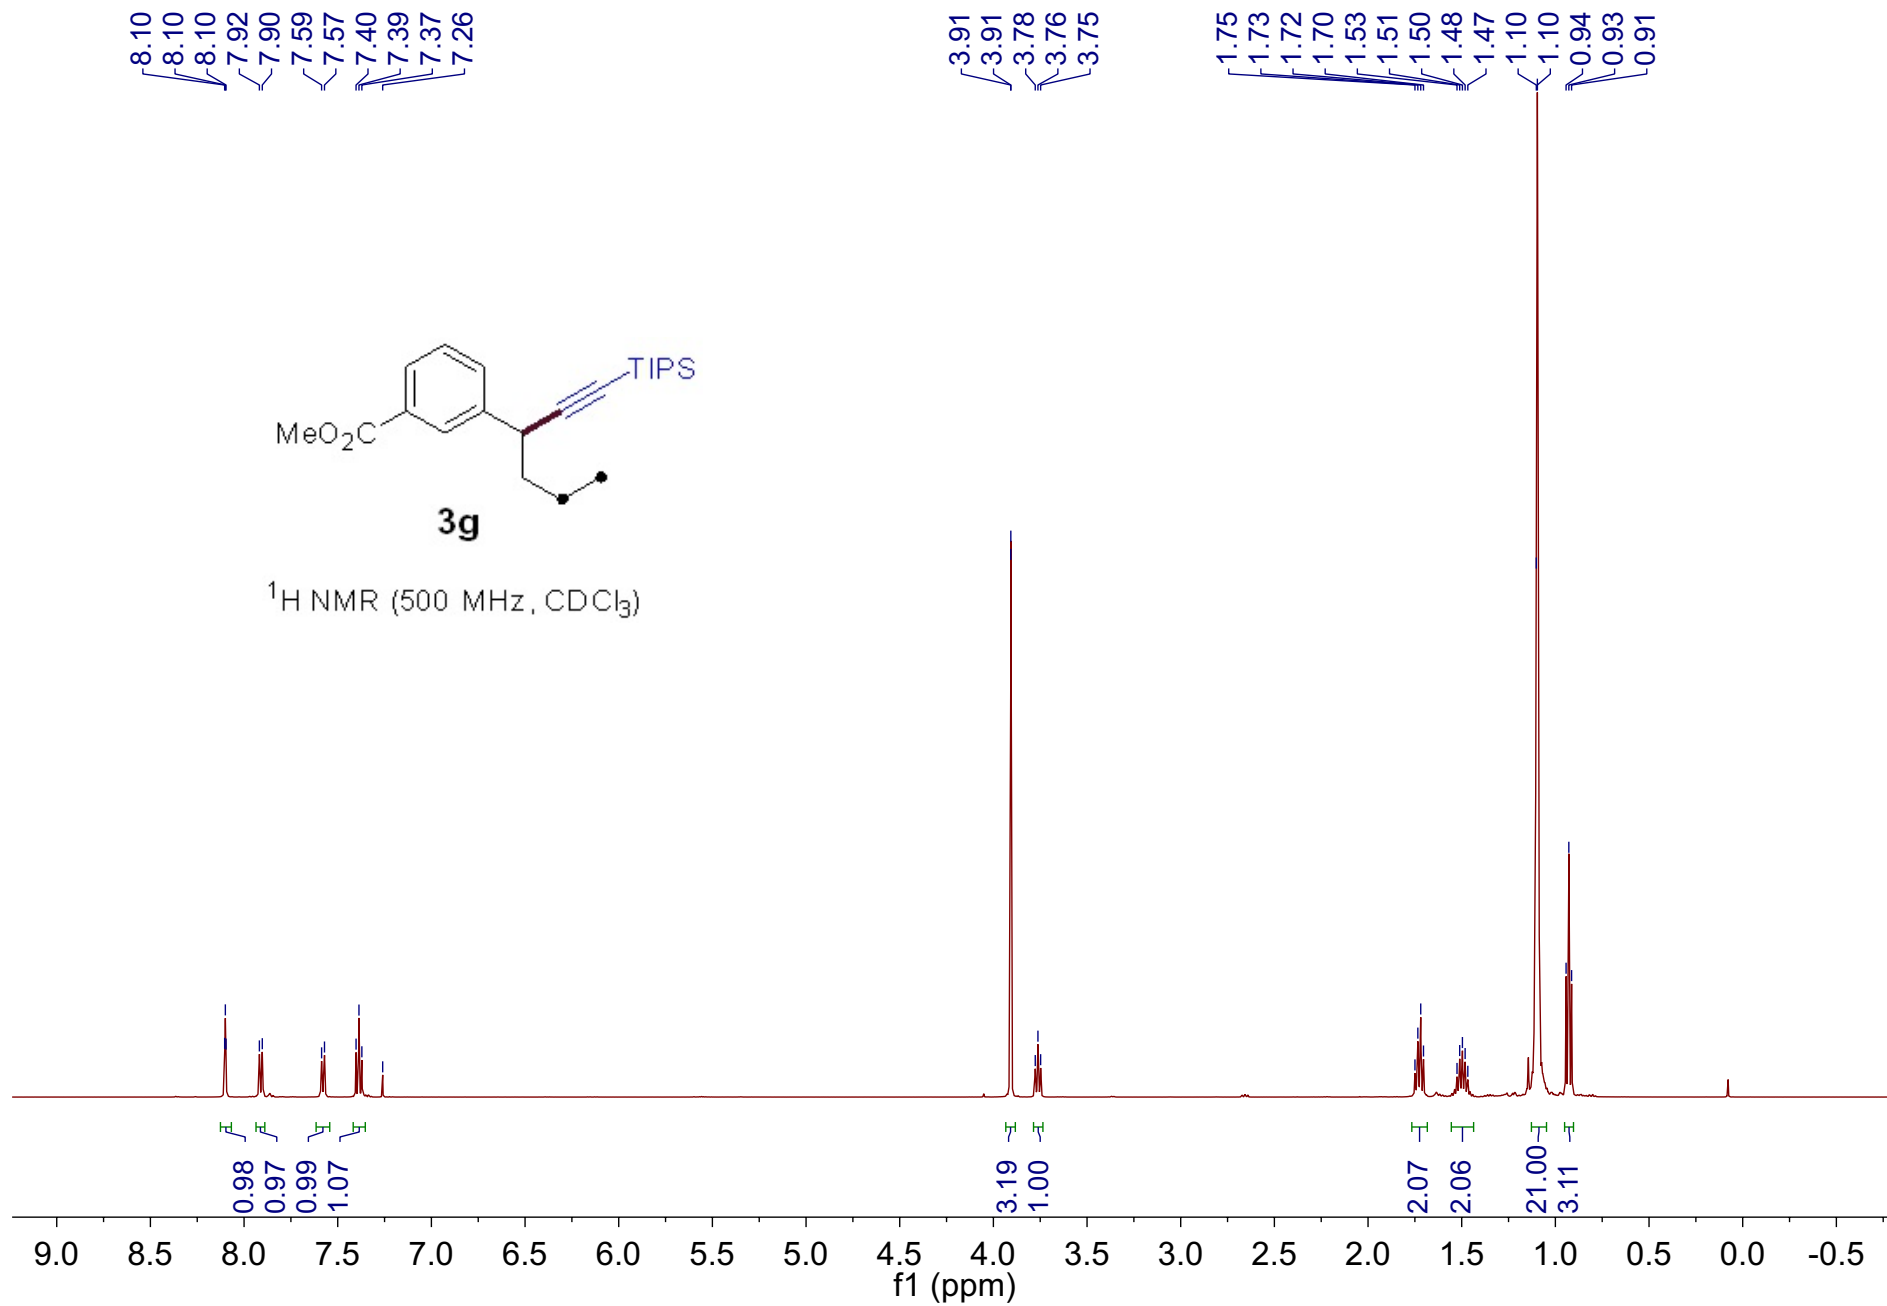

Supplementary Fig. 42.  $^1\text{H}$  NMR (500 MHz,  $\text{CDCl}_3$ ) spectra for compound **3g**

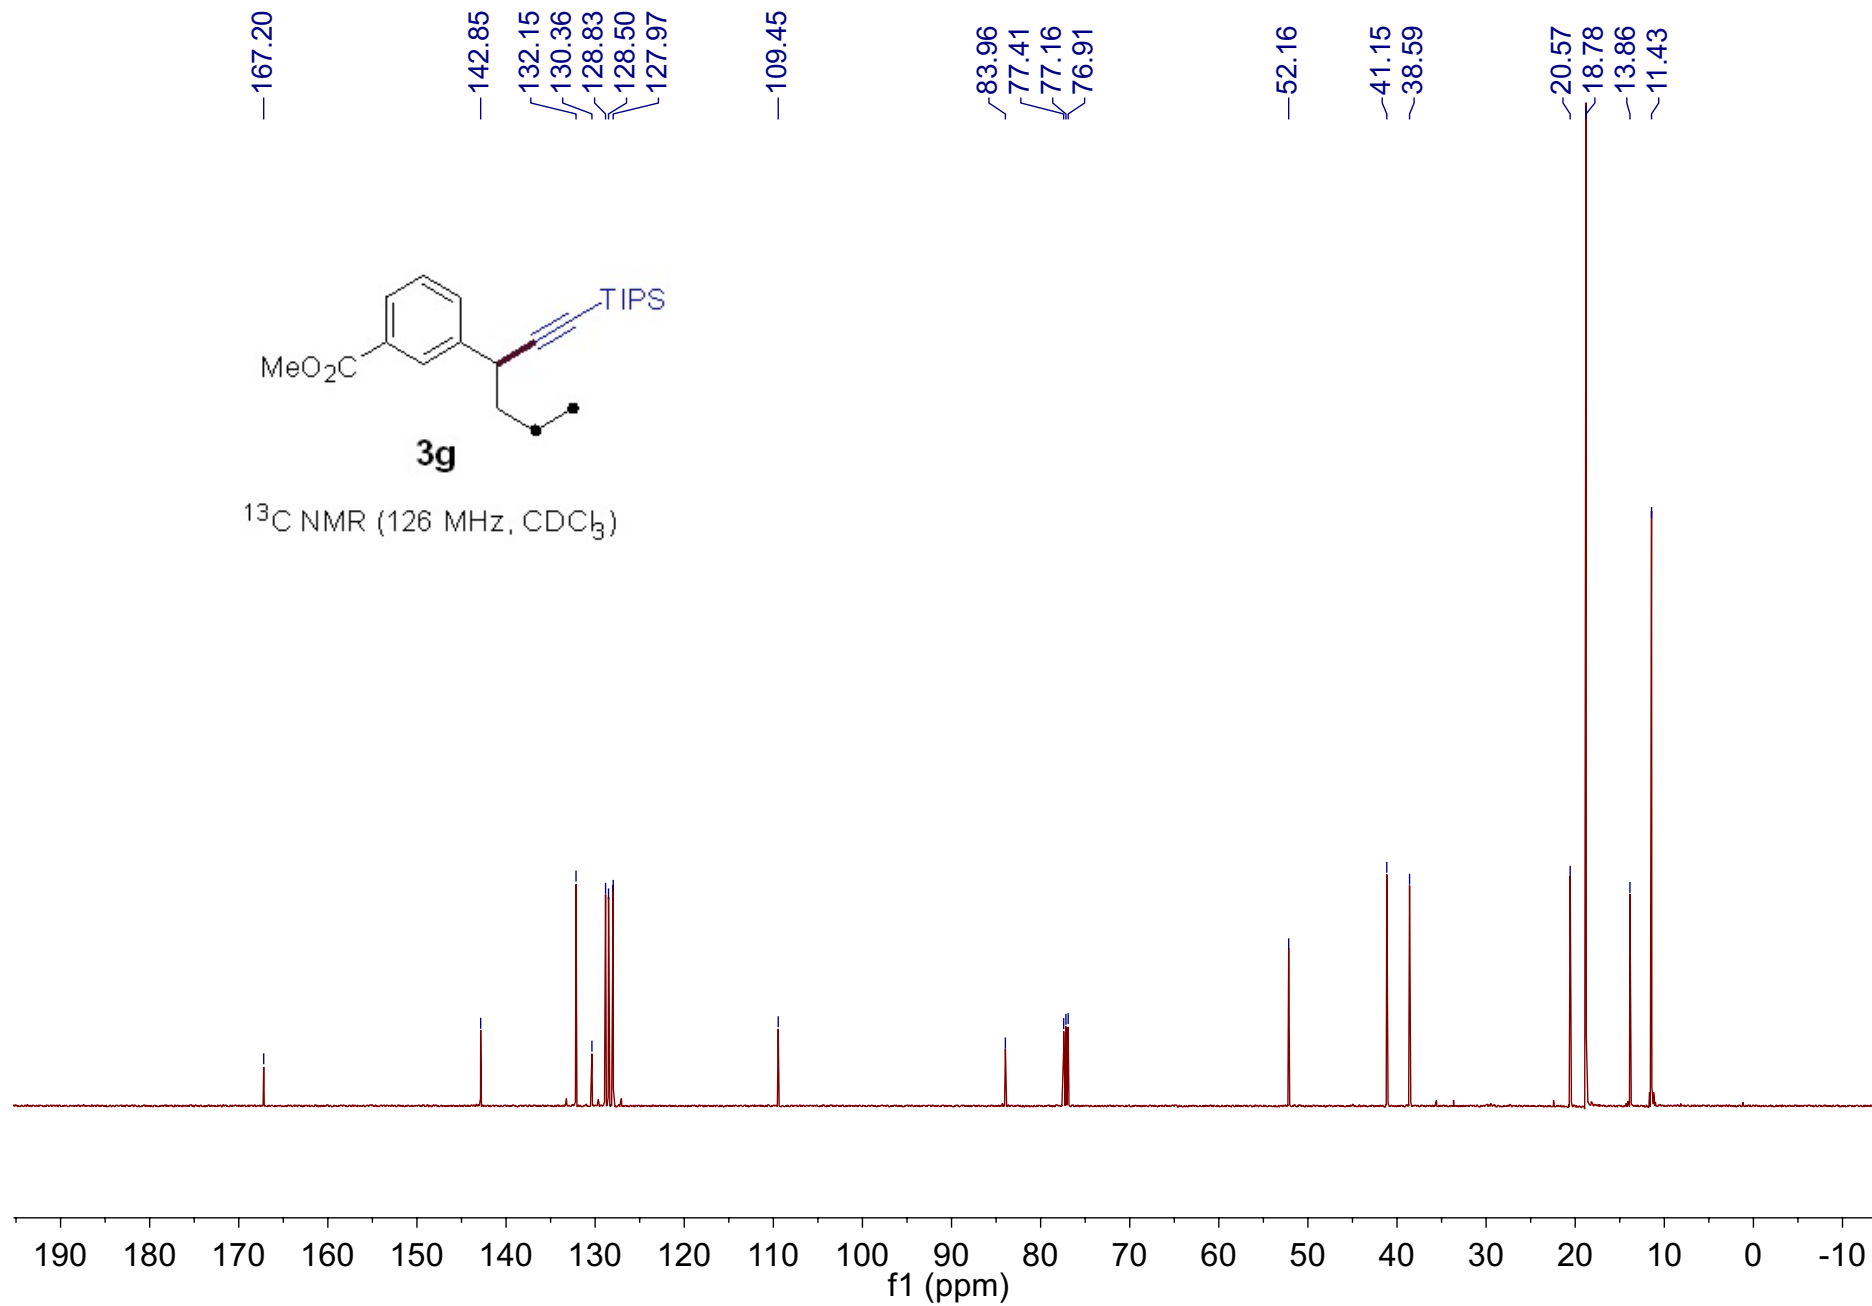

**Supplementary Fig. 43.**  $^{13}\text{C}$  NMR (126 MHz,  $\text{CDCl}_3$ ) spectra for compound **3g**

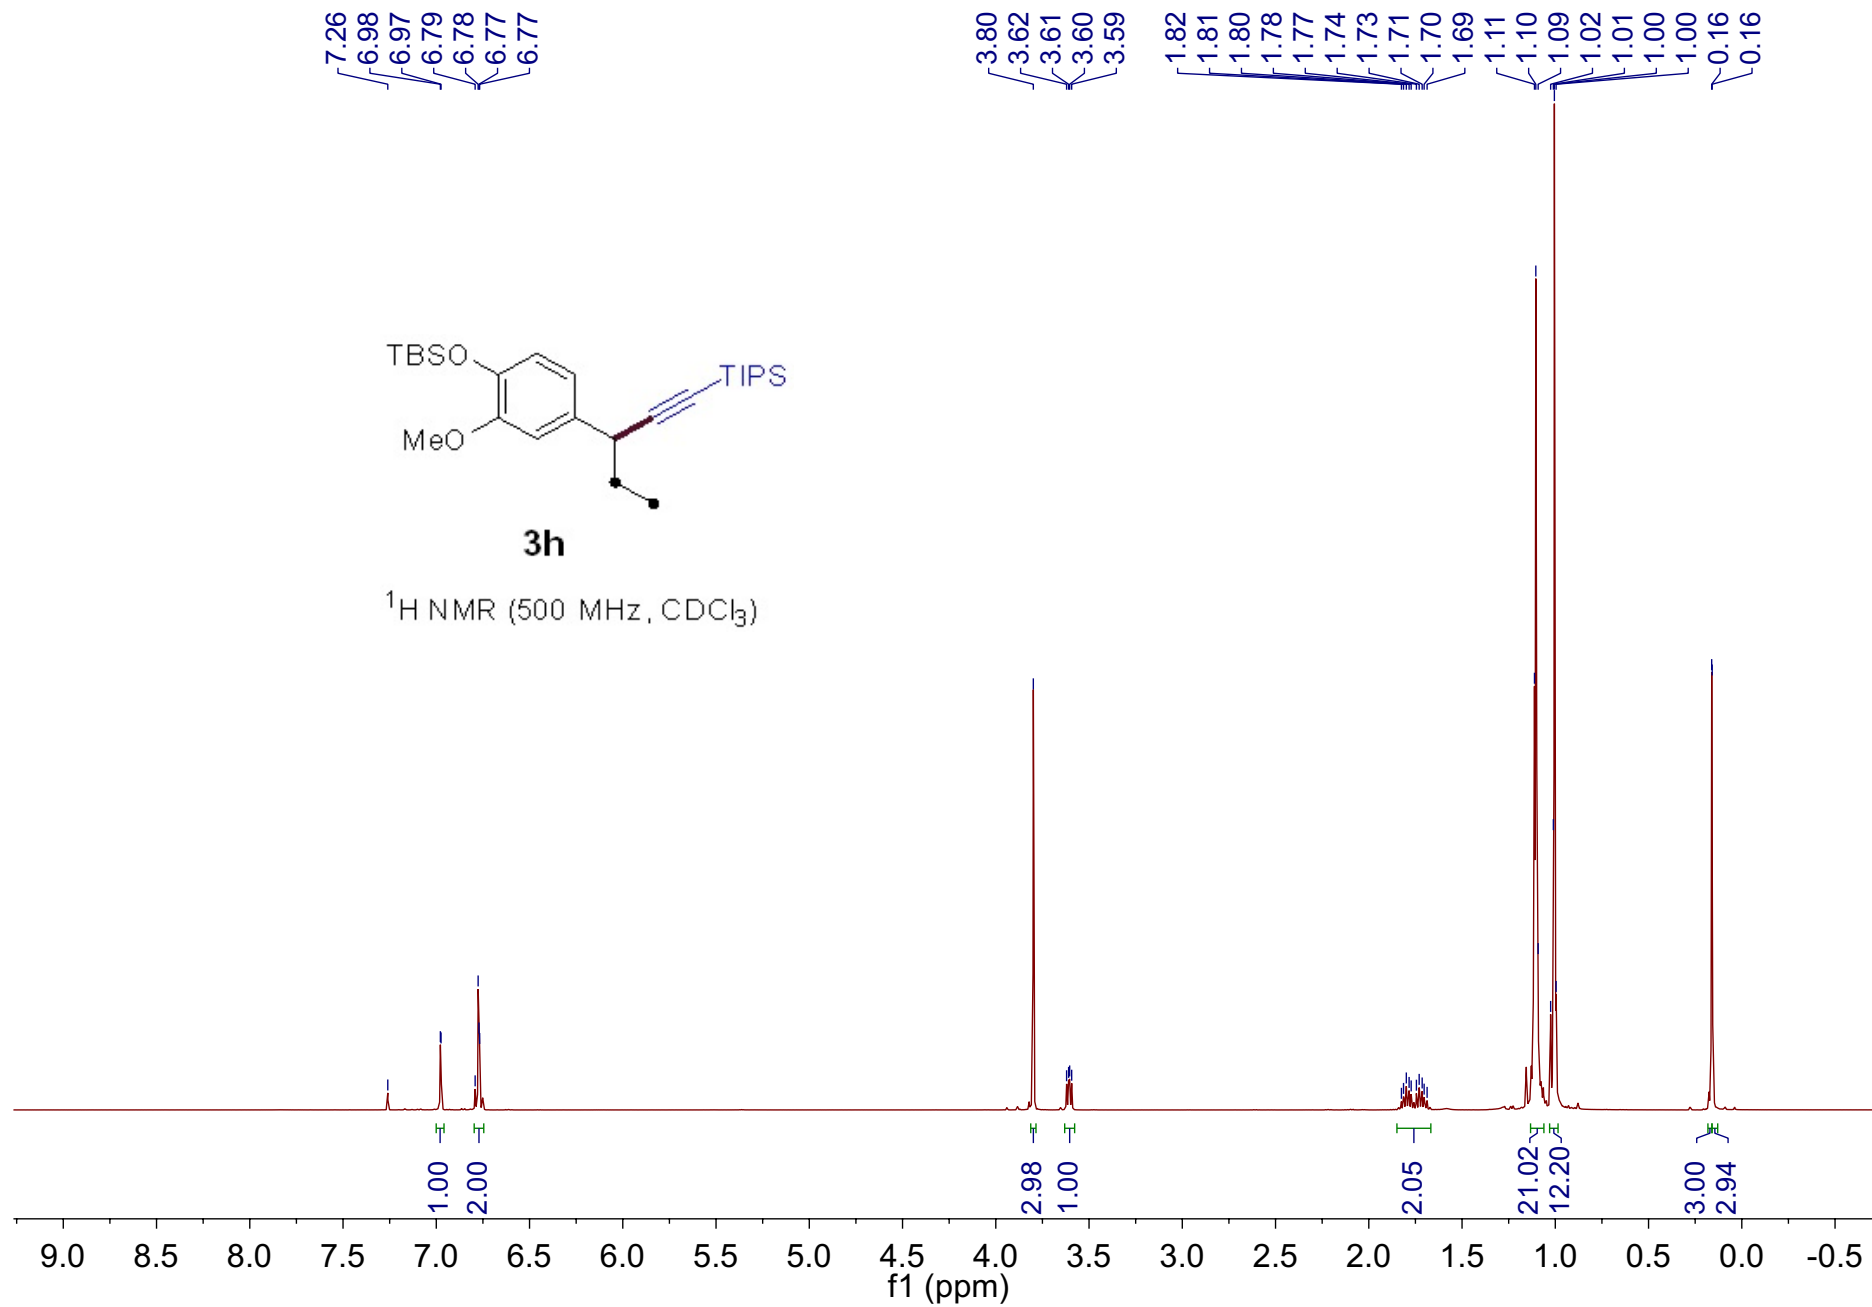

Supplementary Fig. 44.  $^1\text{H NMR}$  (500 MHz,  $\text{CDCl}_3$ ) spectra for compound **3h**



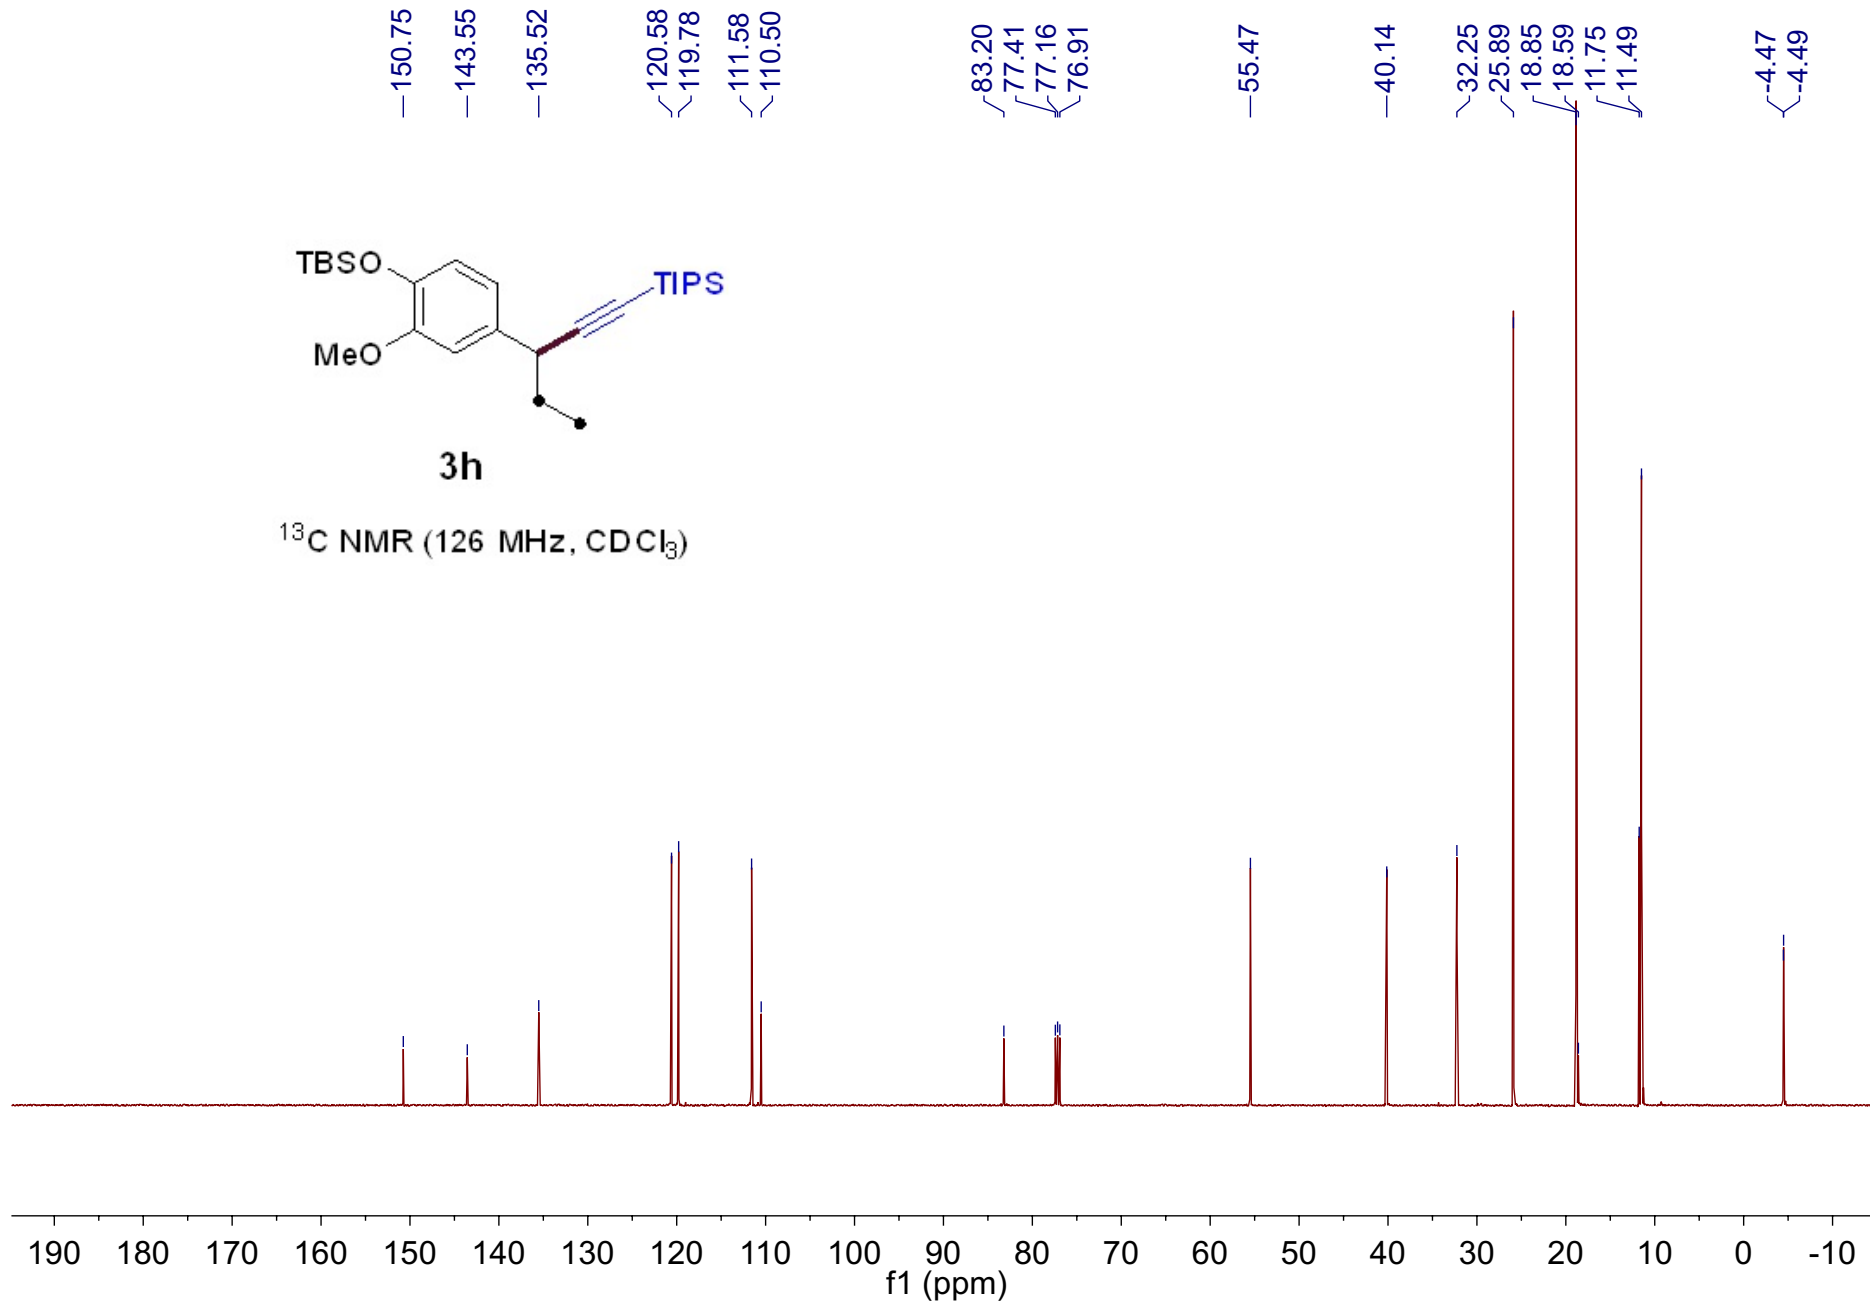

Supplementary Fig. 45. <sup>13</sup>C NMR (126 MHz, CDCl<sub>3</sub>) spectra for compound **3h**

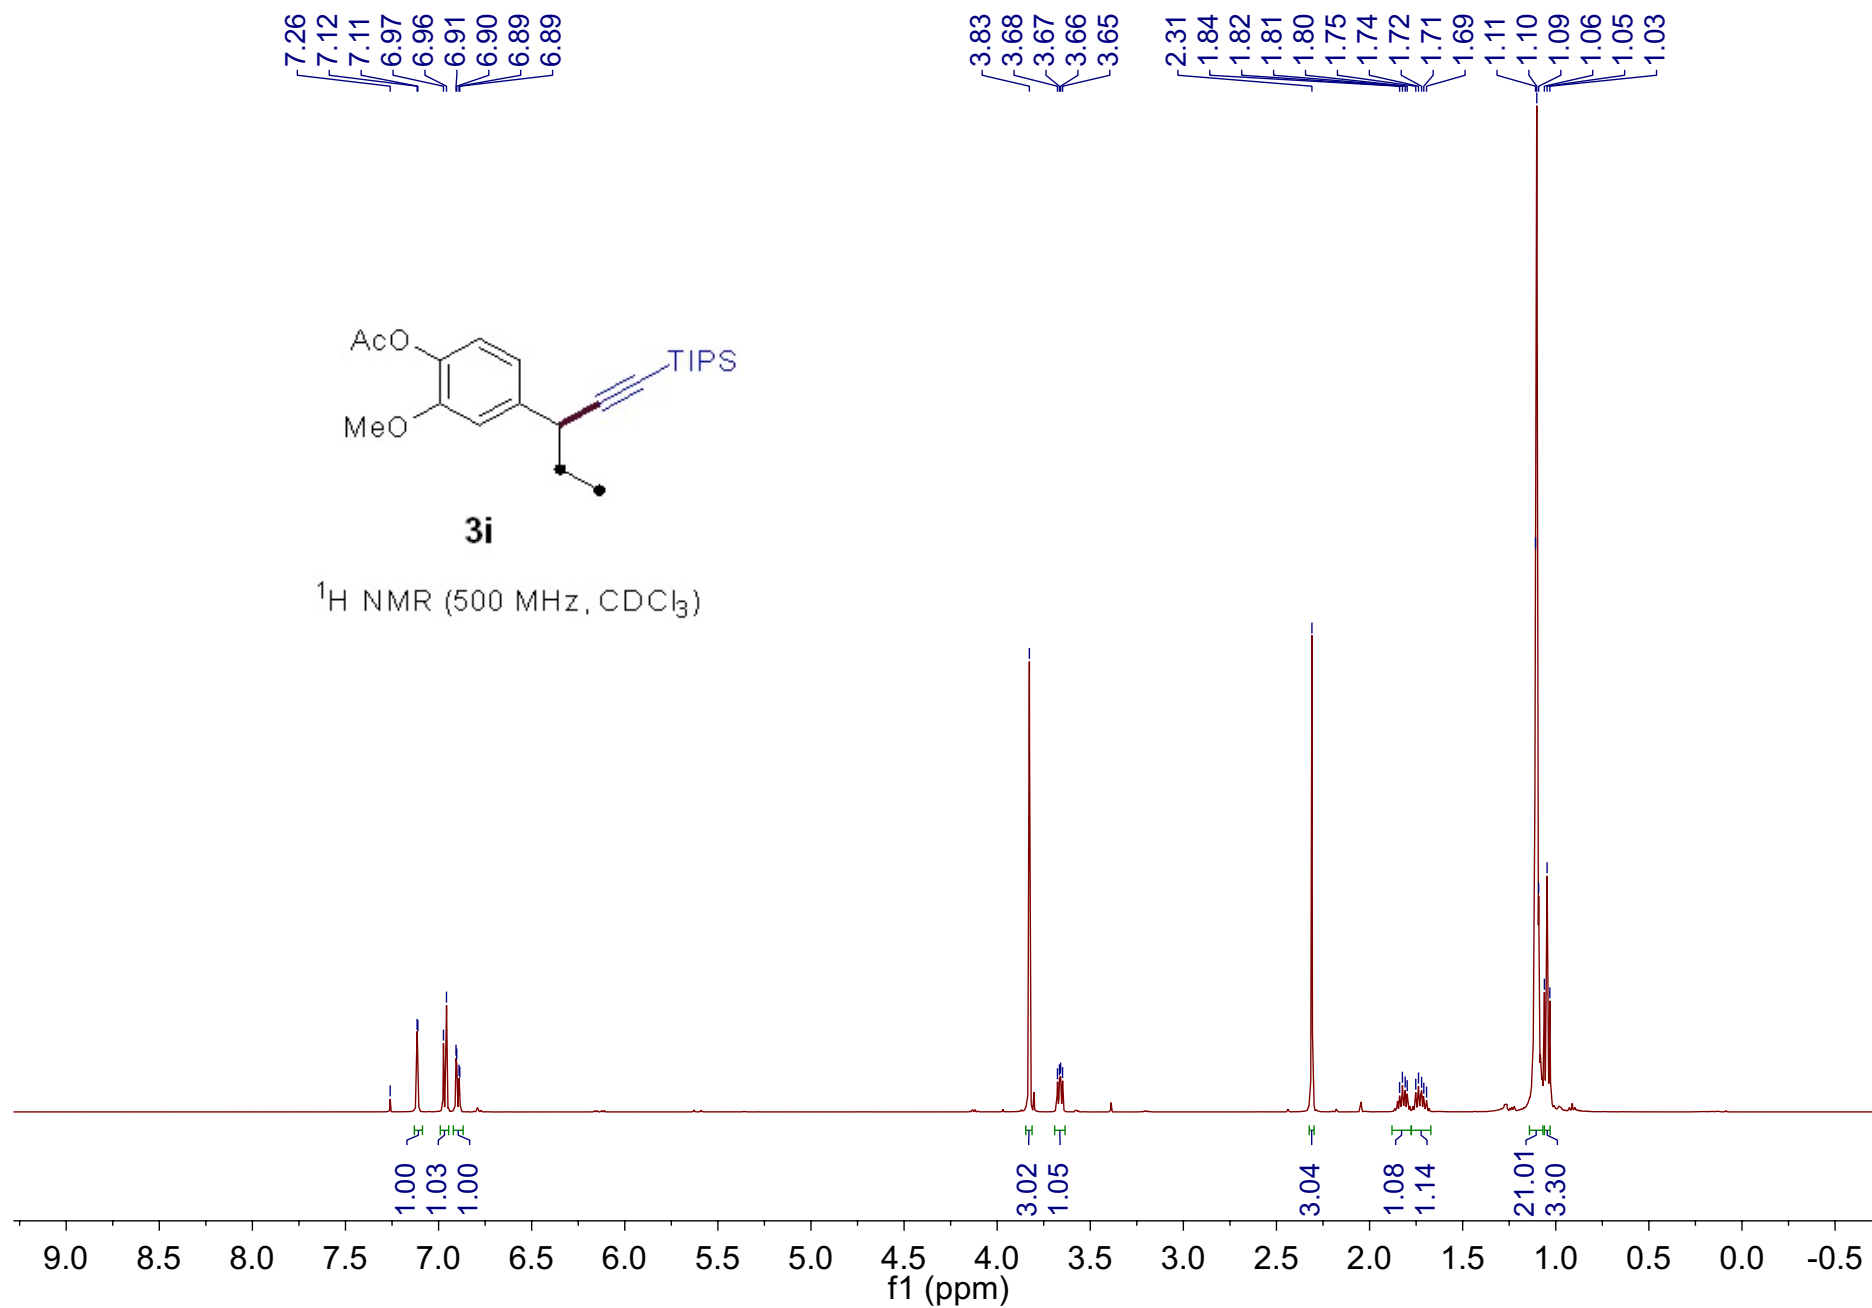

Supplementary Fig. 46.  $^1\text{H NMR}$  (500 MHz,  $\text{CDCl}_3$ ) spectra for compound **3i**

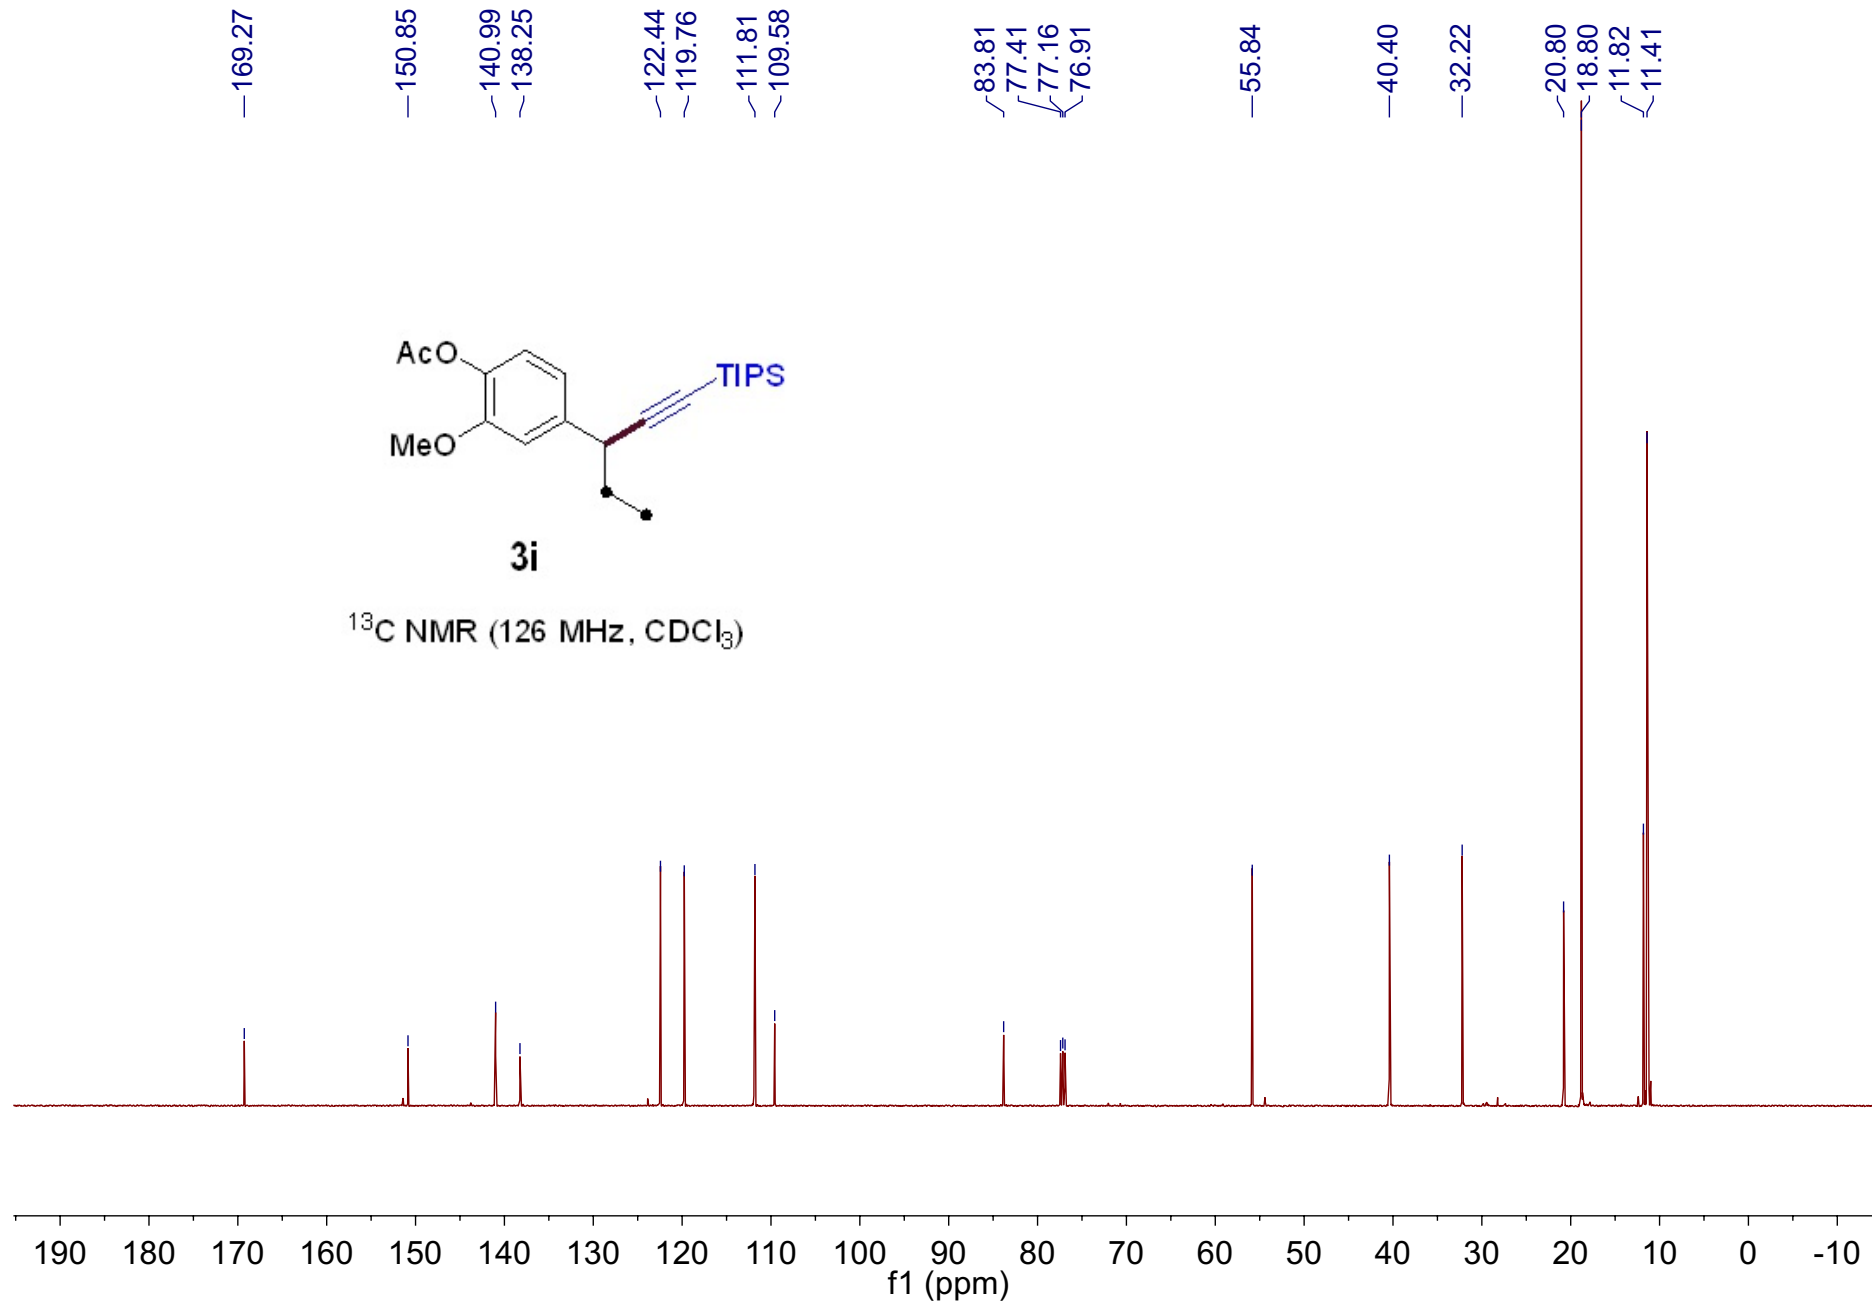

Supplementary Fig. 47.  $^{13}\text{C}$  NMR (126 MHz,  $\text{CDCl}_3$ ) spectra for compound **3i**

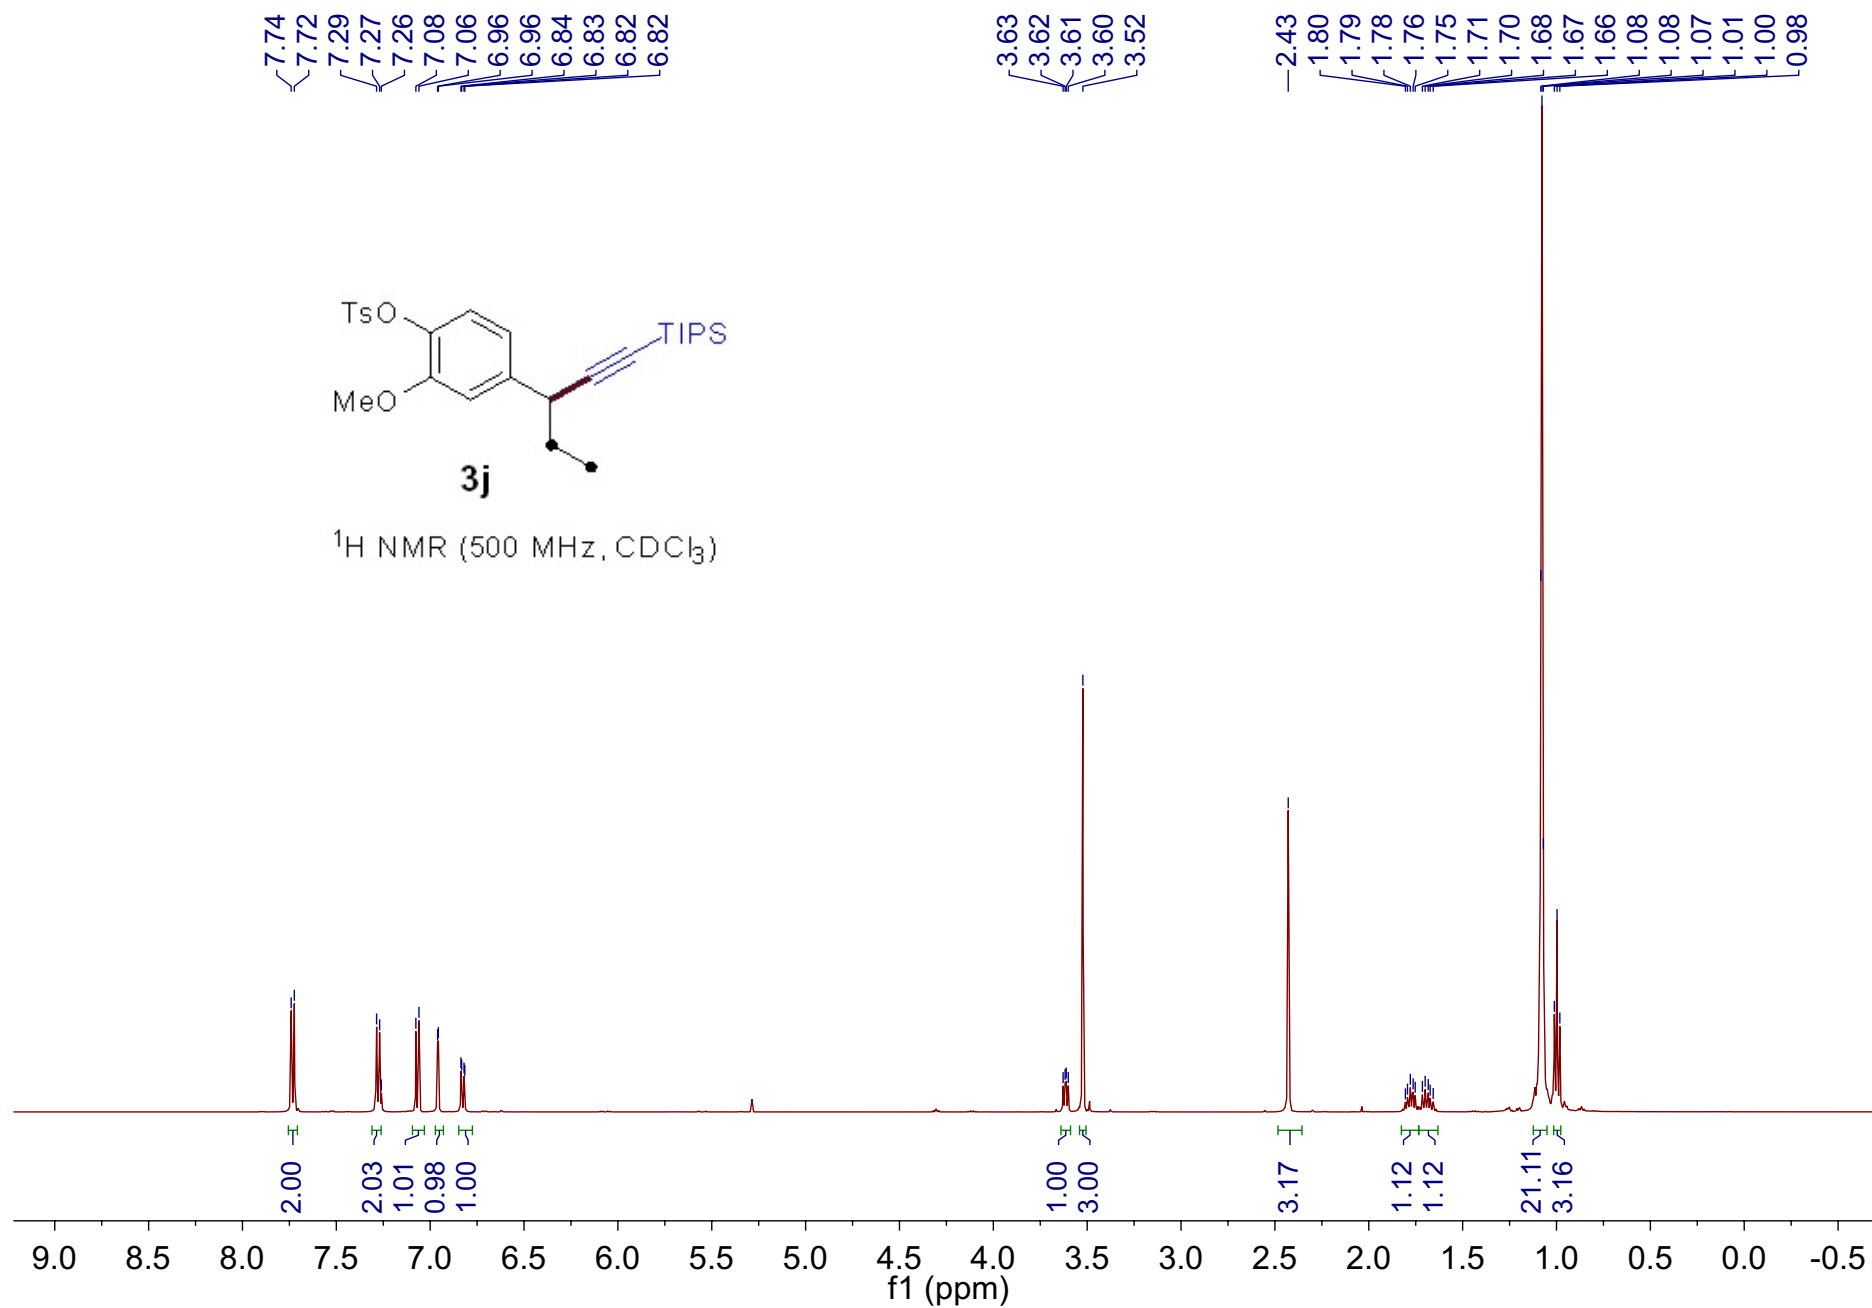

Supplementary Fig. 48.  $^1\text{H NMR}$  (500 MHz,  $\text{CDCl}_3$ ) spectra for compound **3j**

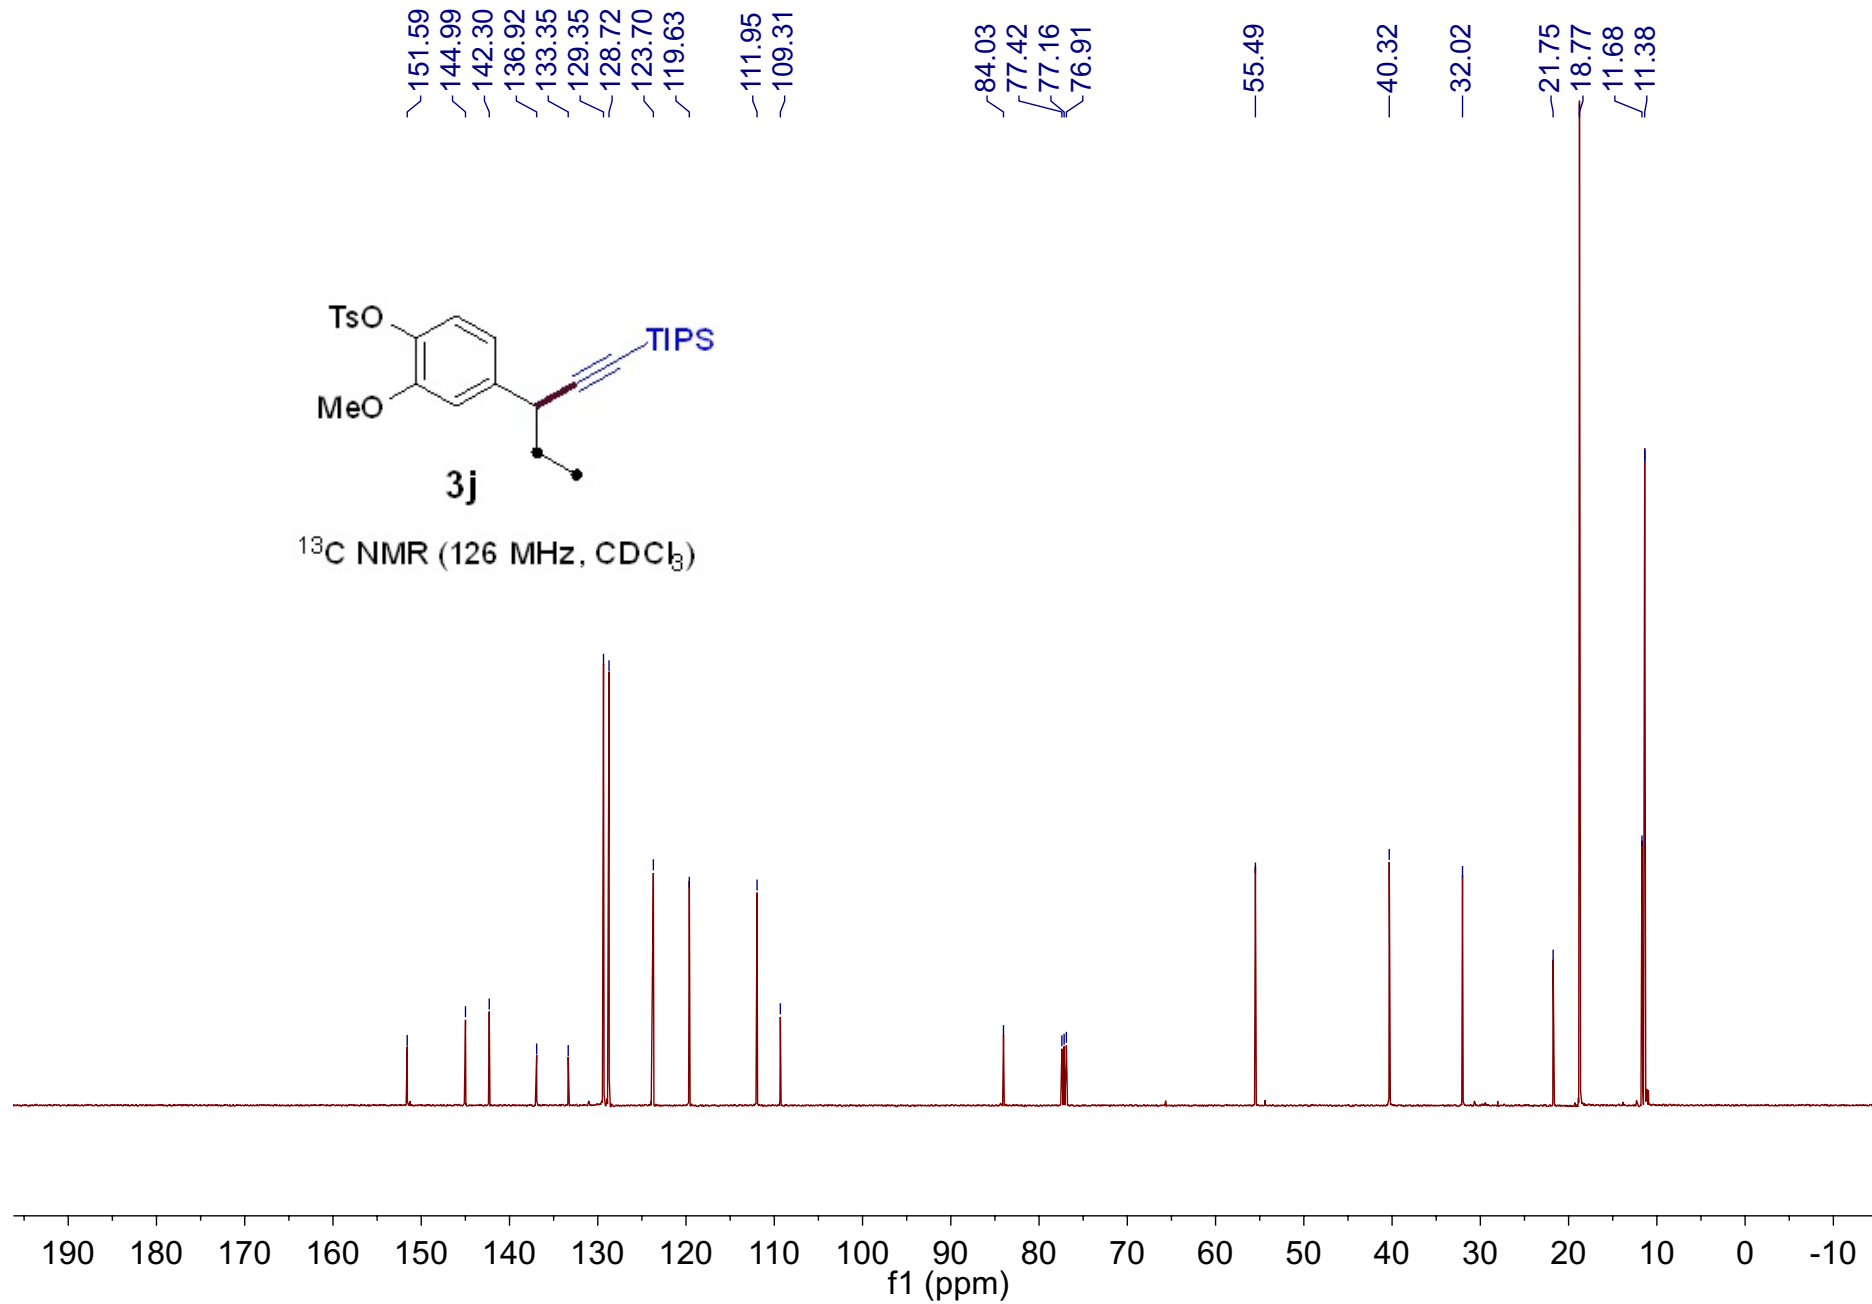

Supplementary Fig. 49. <sup>13</sup>C NMR (126 MHz, CDCl<sub>3</sub>) spectra for compound **3j**

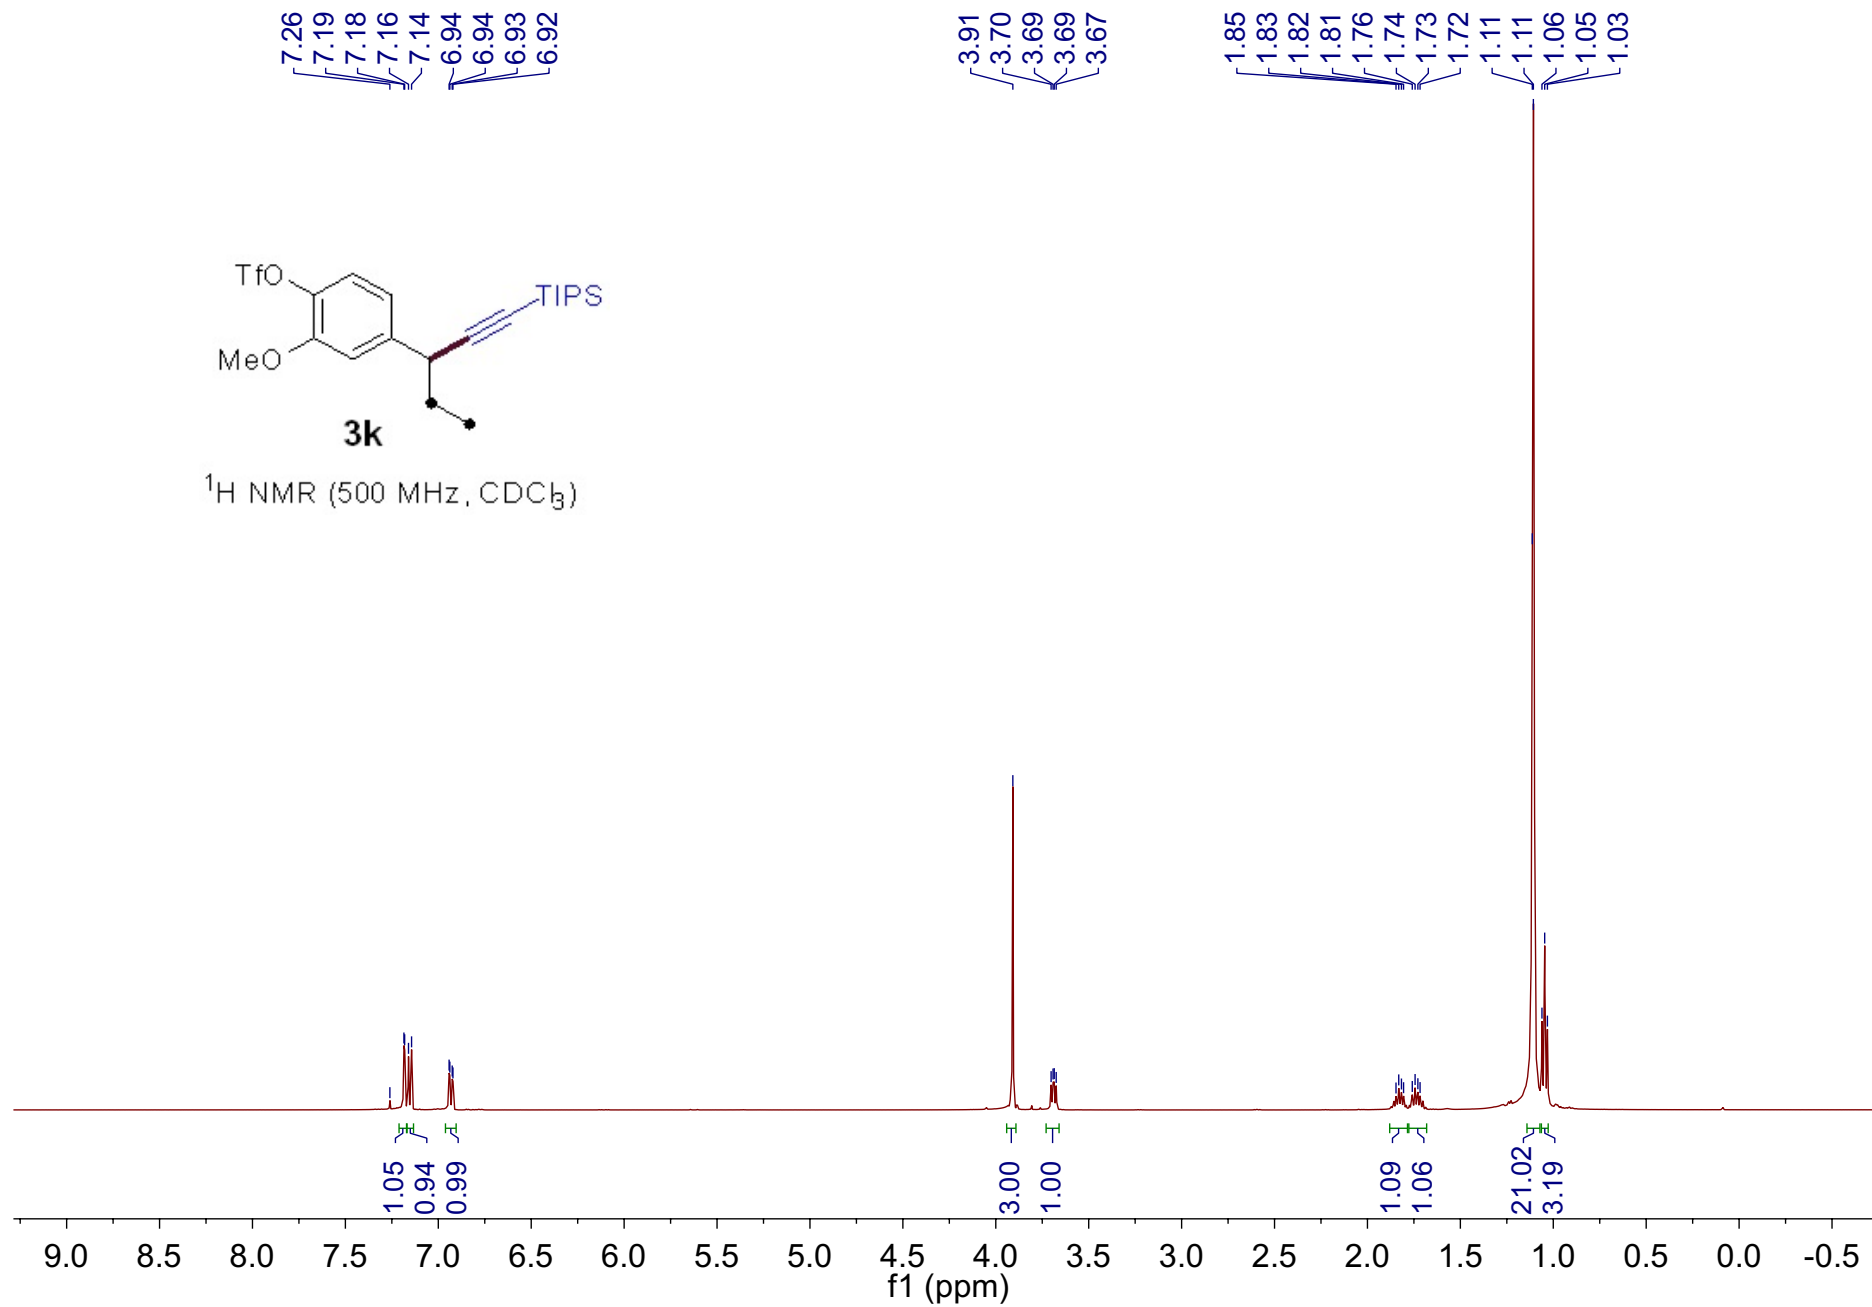

**Supplementary Fig. 50.** <sup>1</sup>H NMR (500 MHz, CDCl<sub>3</sub>) spectra for compound **3k**

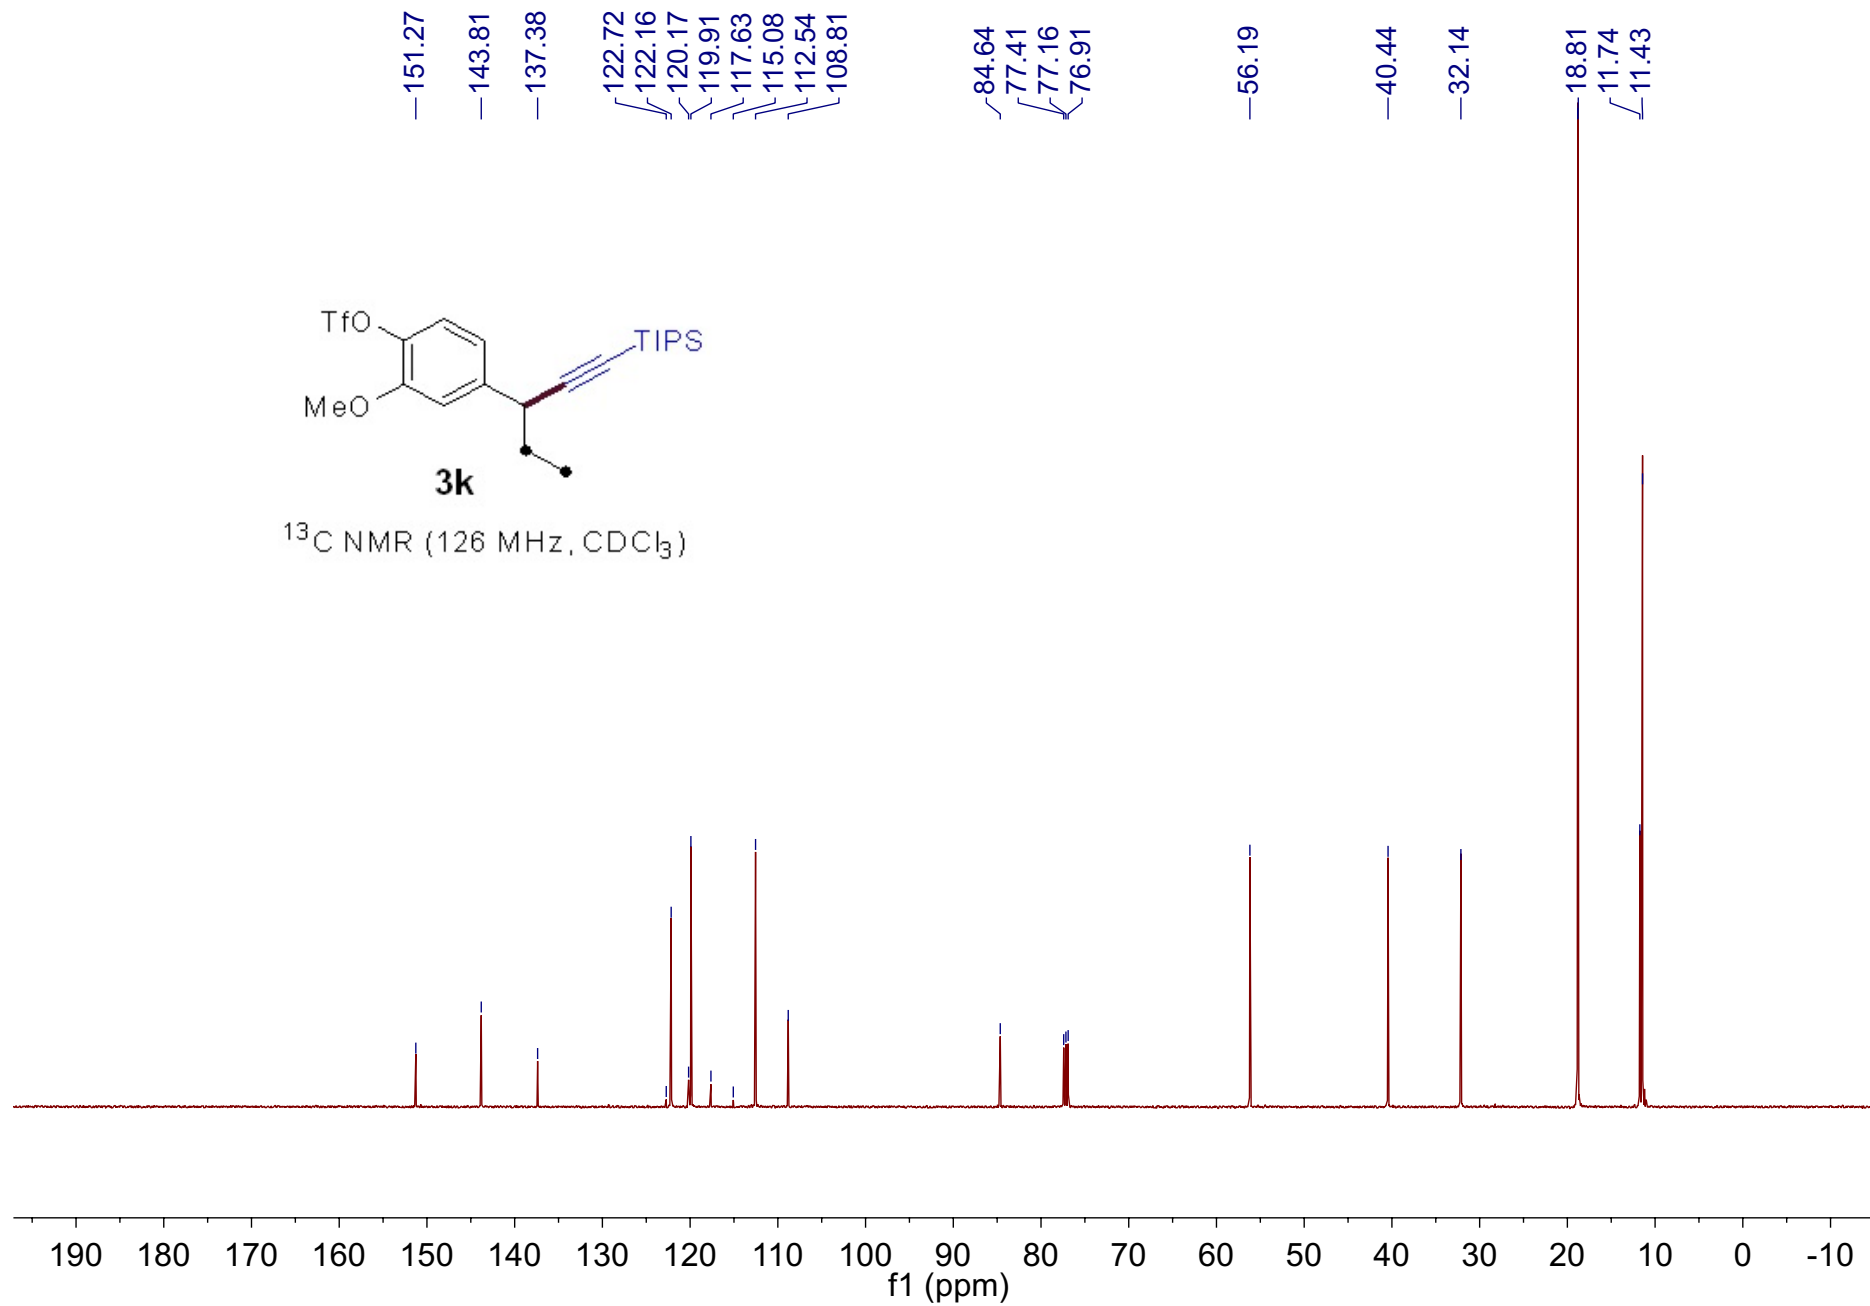

**Supplementary Fig. 51.** <sup>13</sup>C NMR (126 MHz, CDCl<sub>3</sub>) spectra for compound **3k**

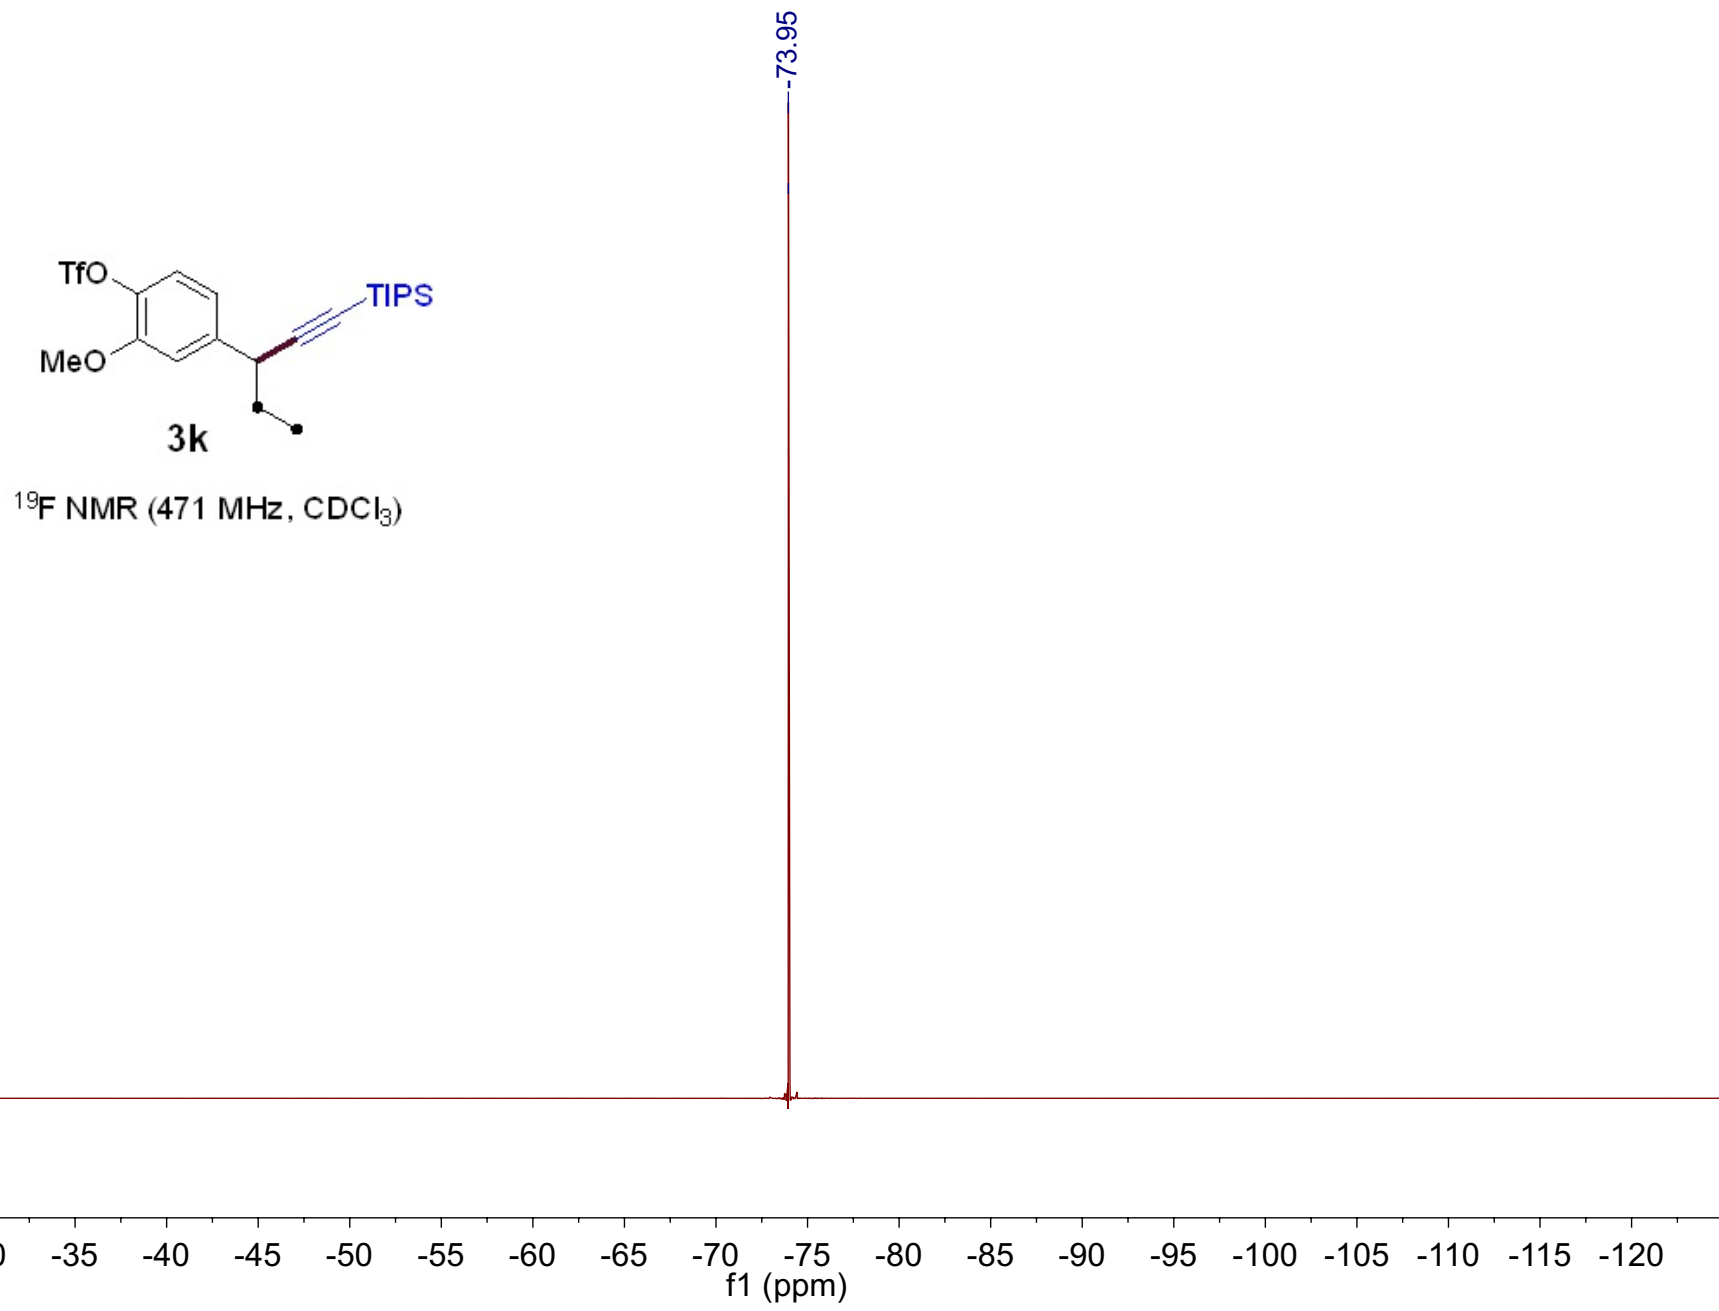

**Supplementary Fig. 52.**  $^{19}\text{F}$  NMR (471 MHz,  $\text{CDCl}_3$ ) spectra for compound **3k**



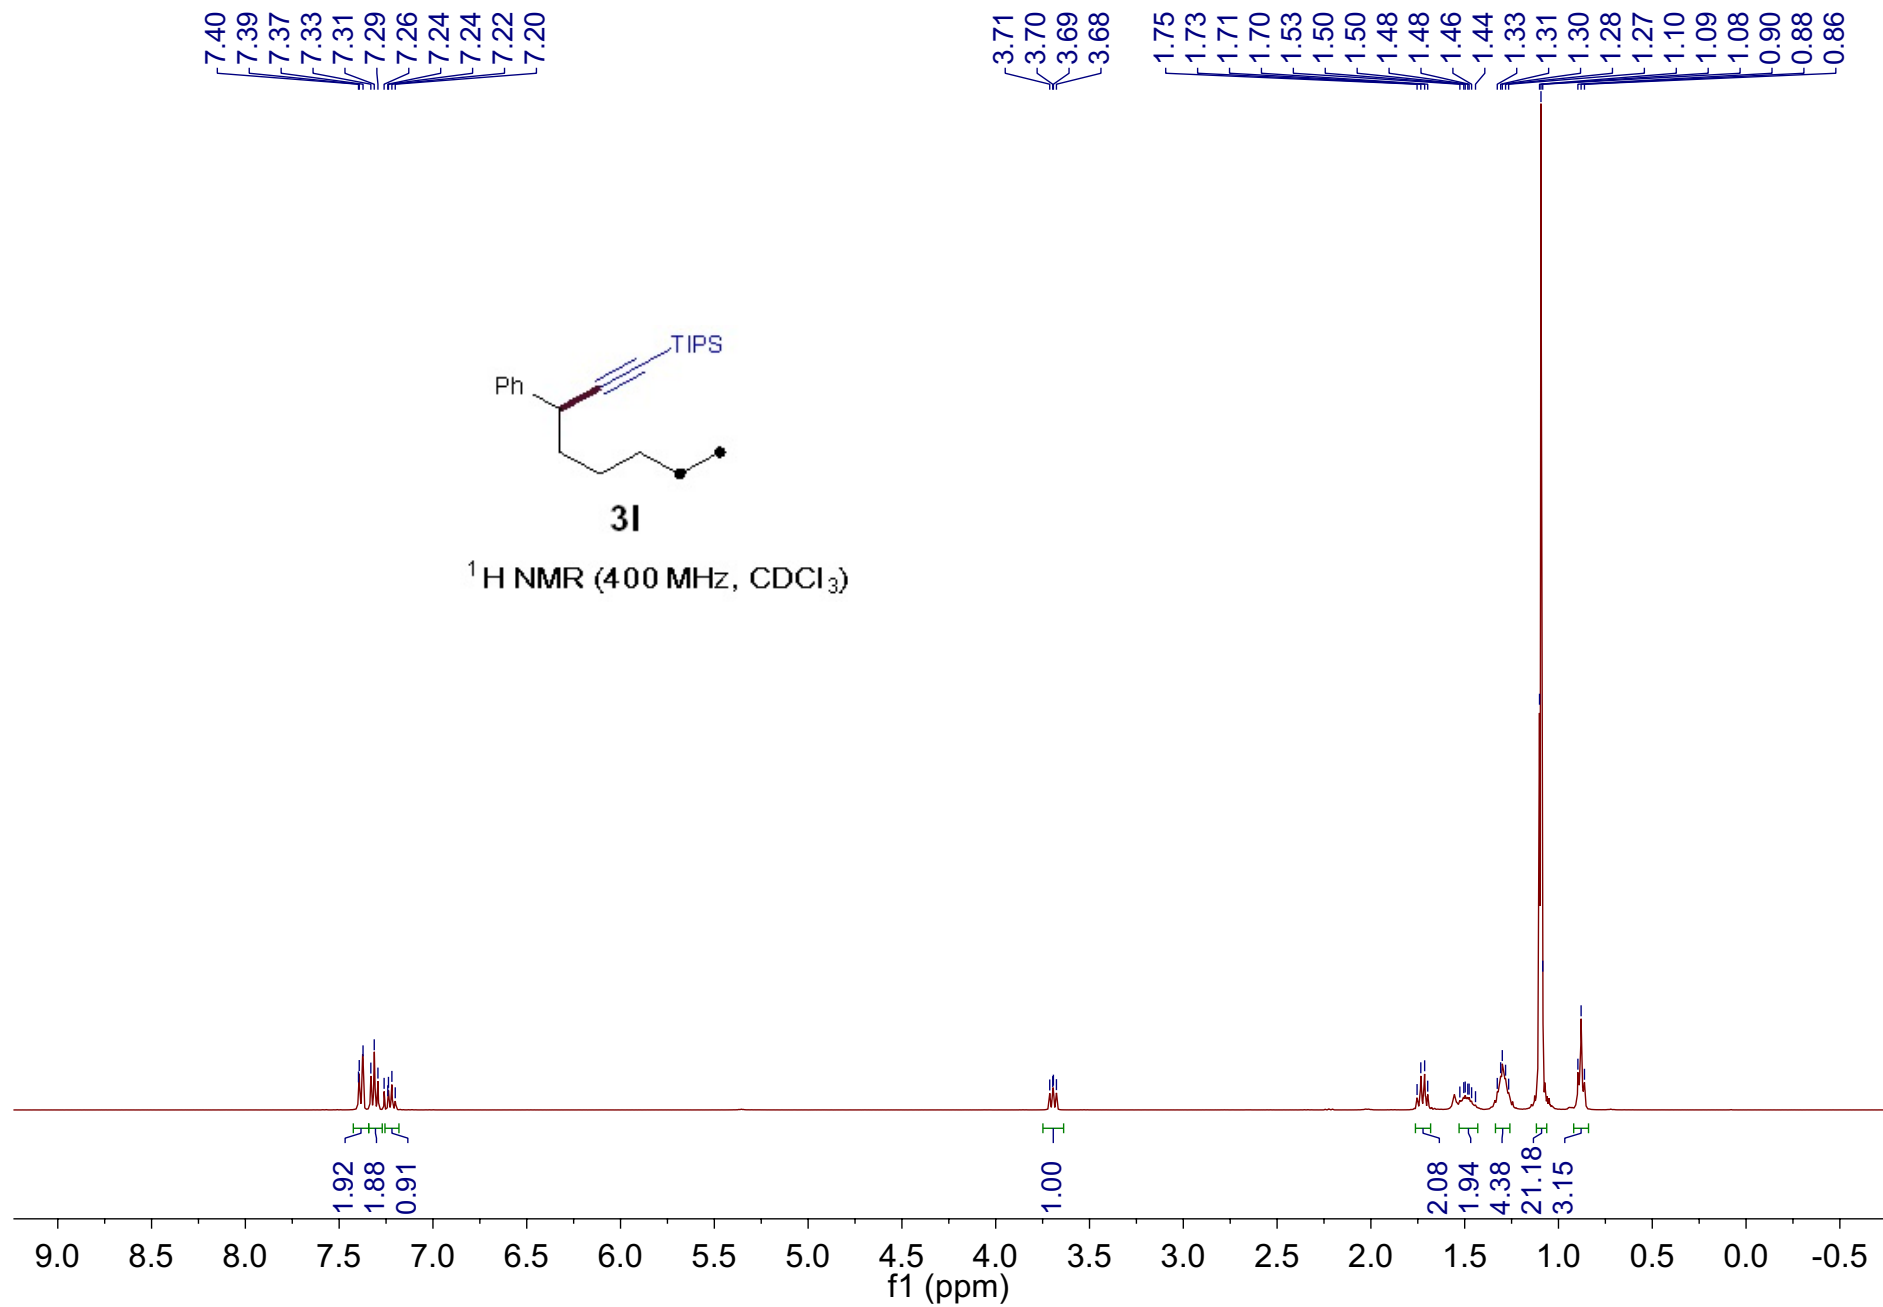

Supplementary Fig. 53.  $^1\text{H NMR}$  (400 MHz,  $\text{CDCl}_3$ ) spectra for compound **3I**

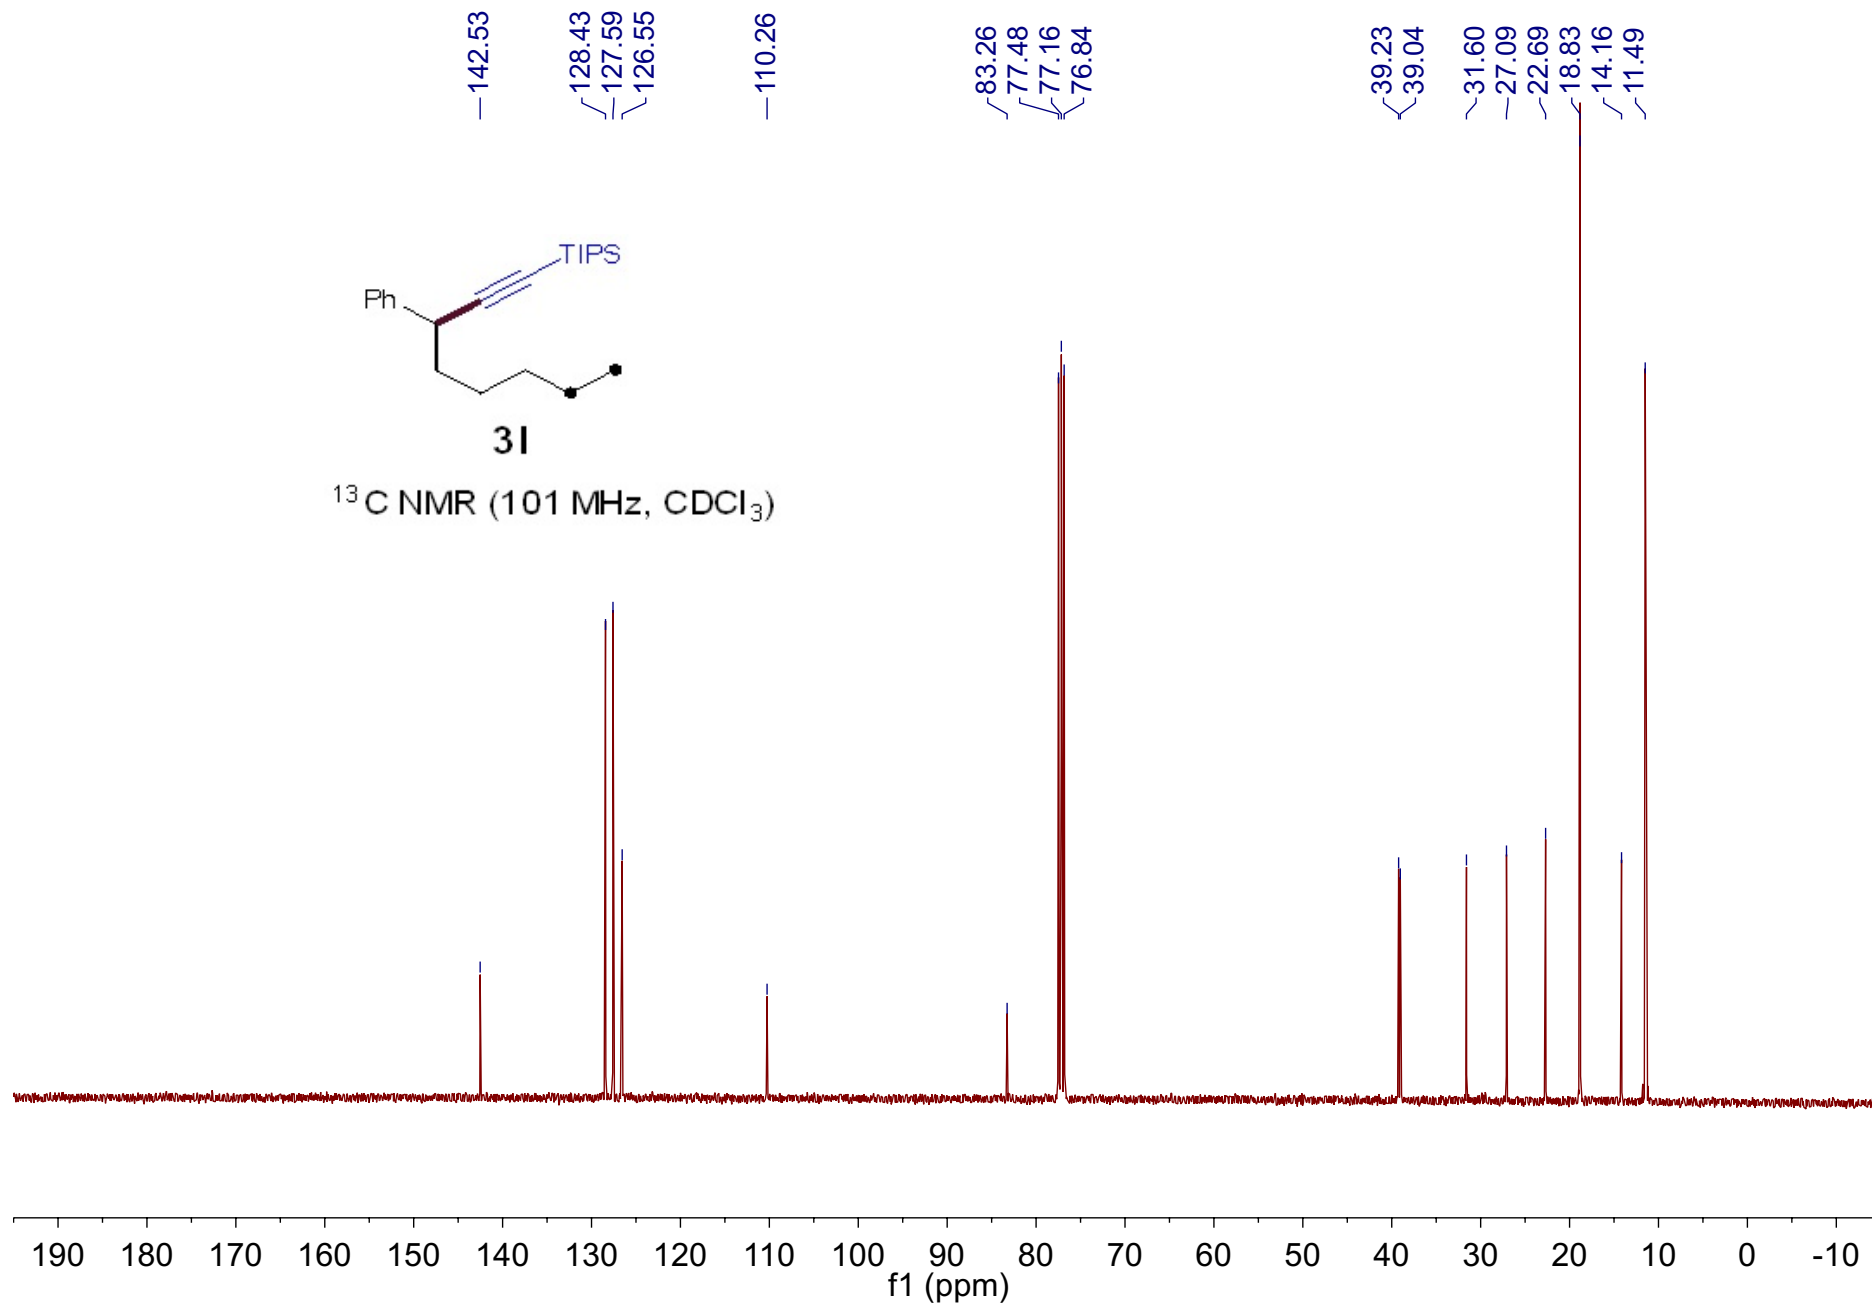

**Supplementary Fig. 54.** <sup>13</sup>C NMR (101 MHz, CDCl<sub>3</sub>) spectra for compound **31**

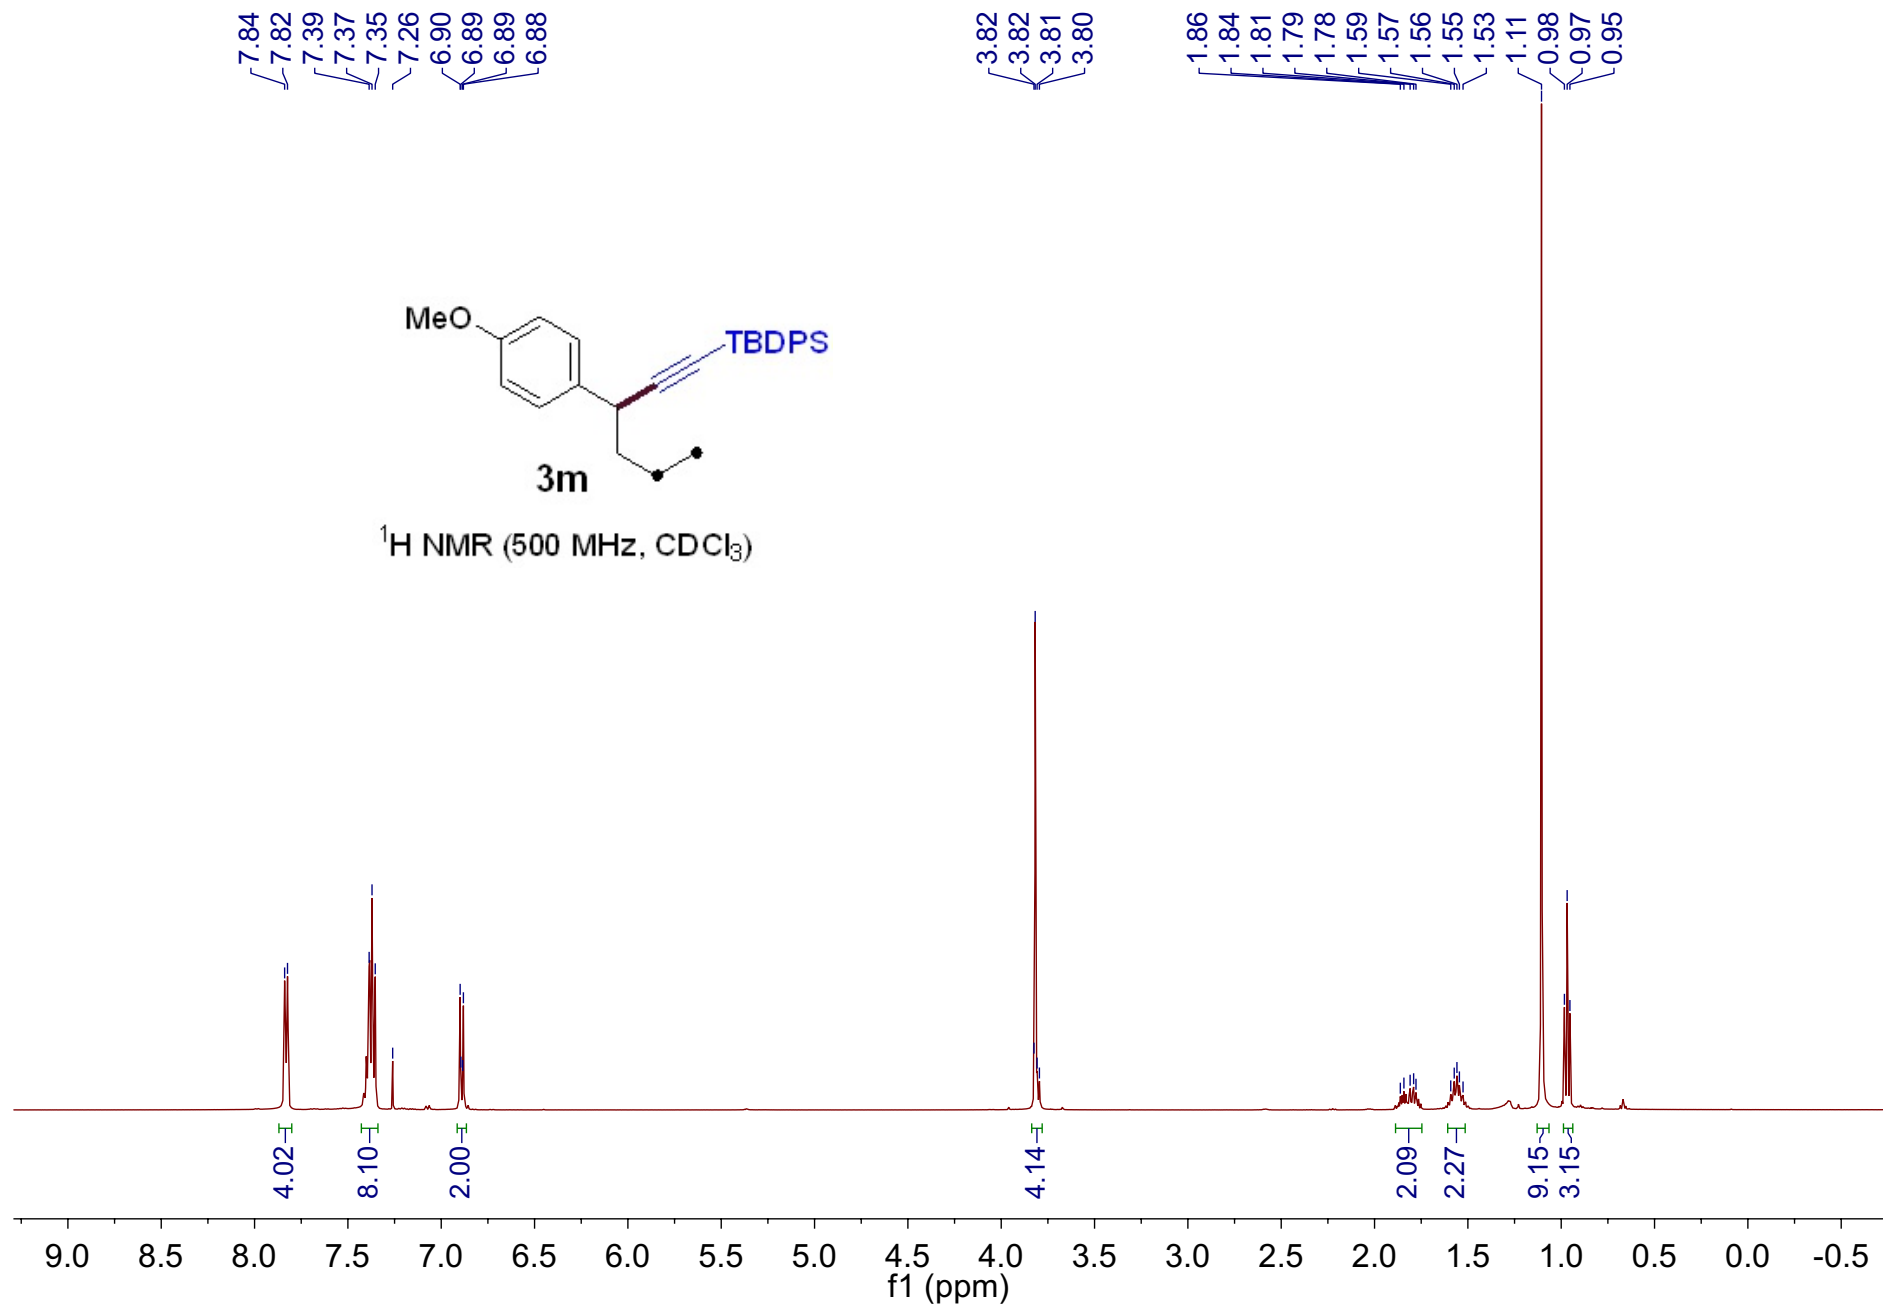

Supplementary Fig. 55.  $^1\text{H}$  NMR (500 MHz,  $\text{CDCl}_3$ ) spectra for compound **3m**

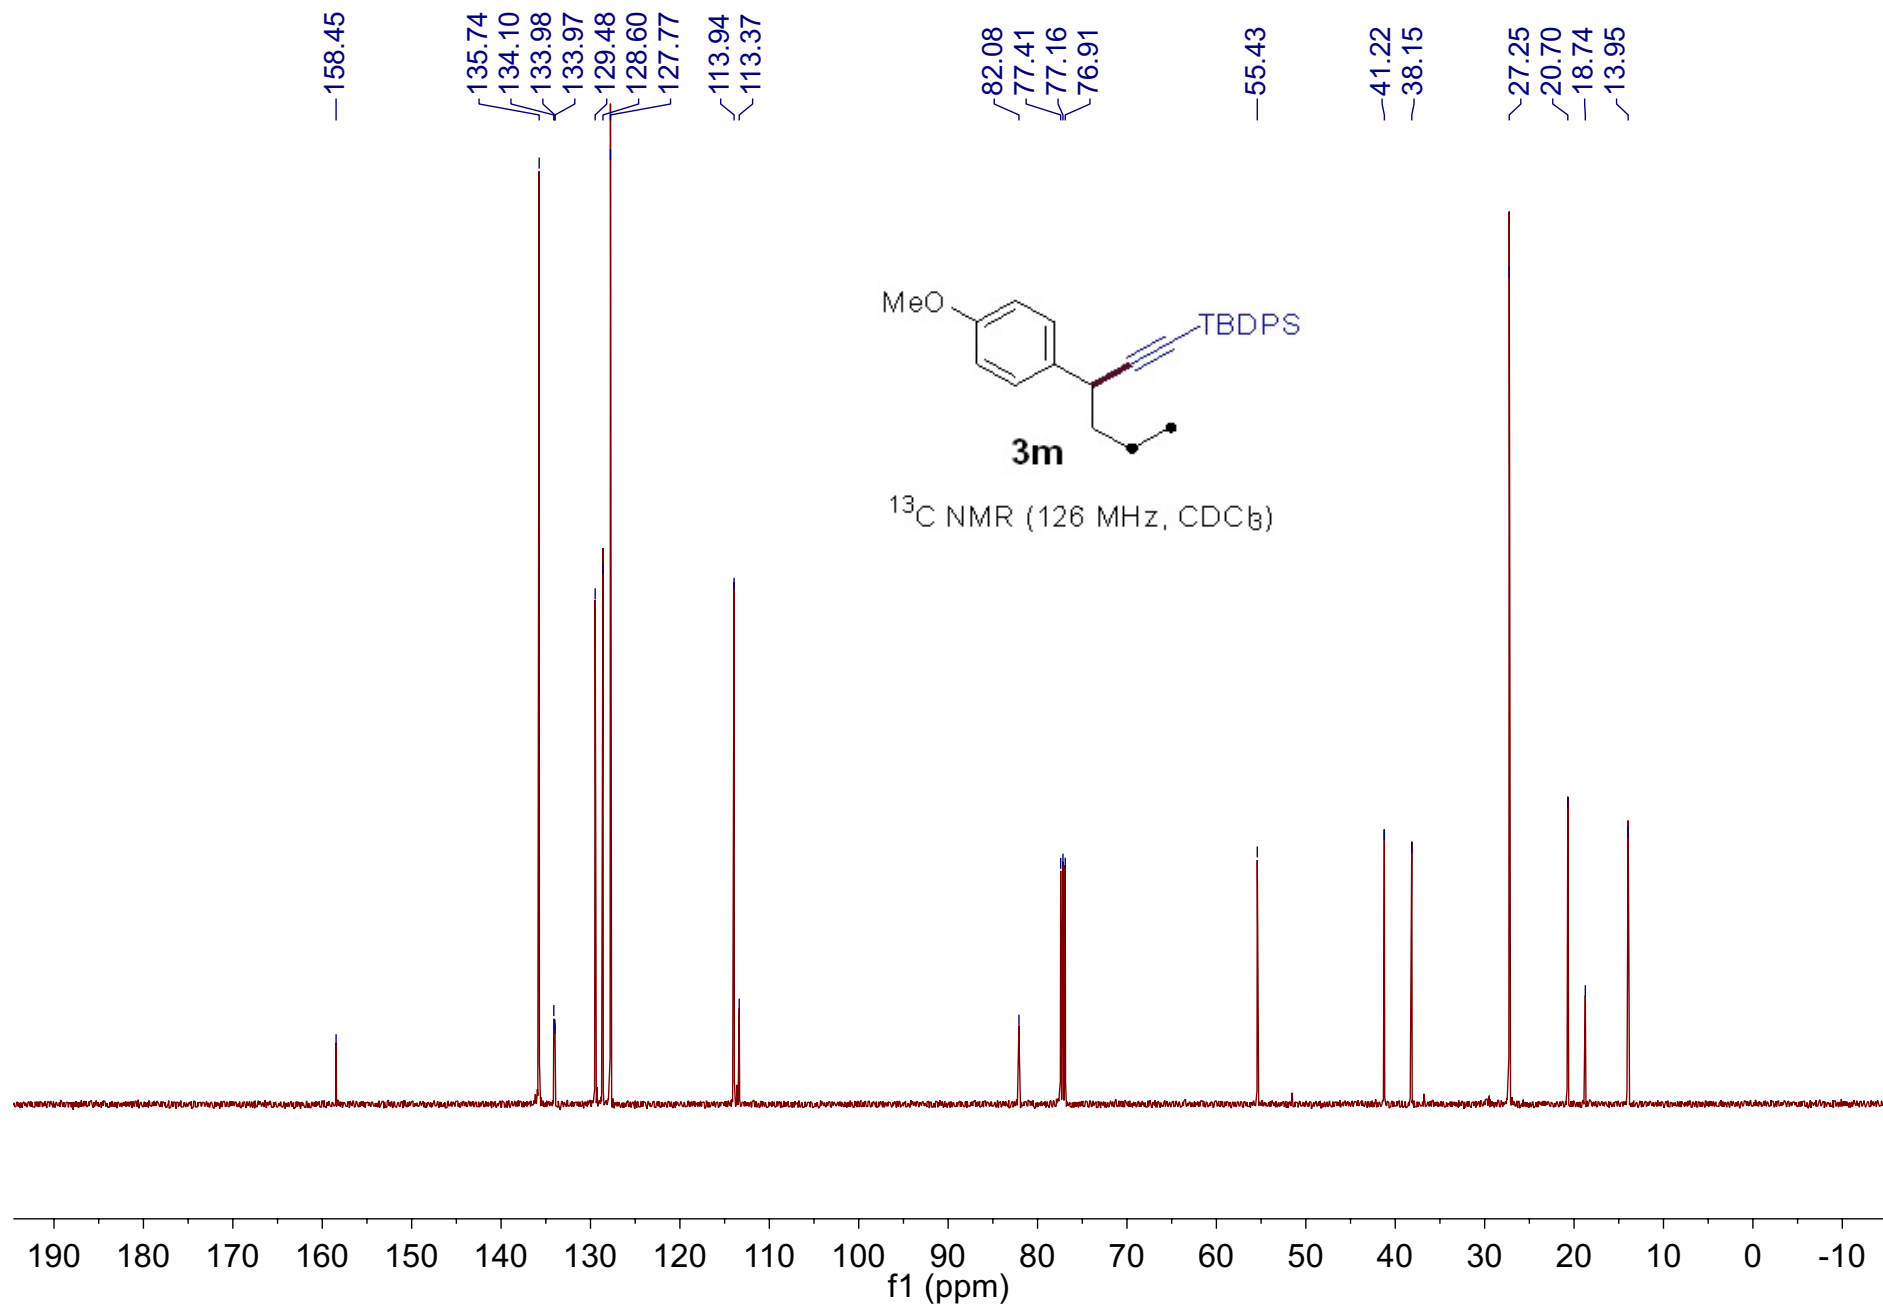

Supplementary Fig. 56.  $^{13}\text{C}$  NMR (126 MHz,  $\text{CDCl}_3$ ) spectra for compound **3m**

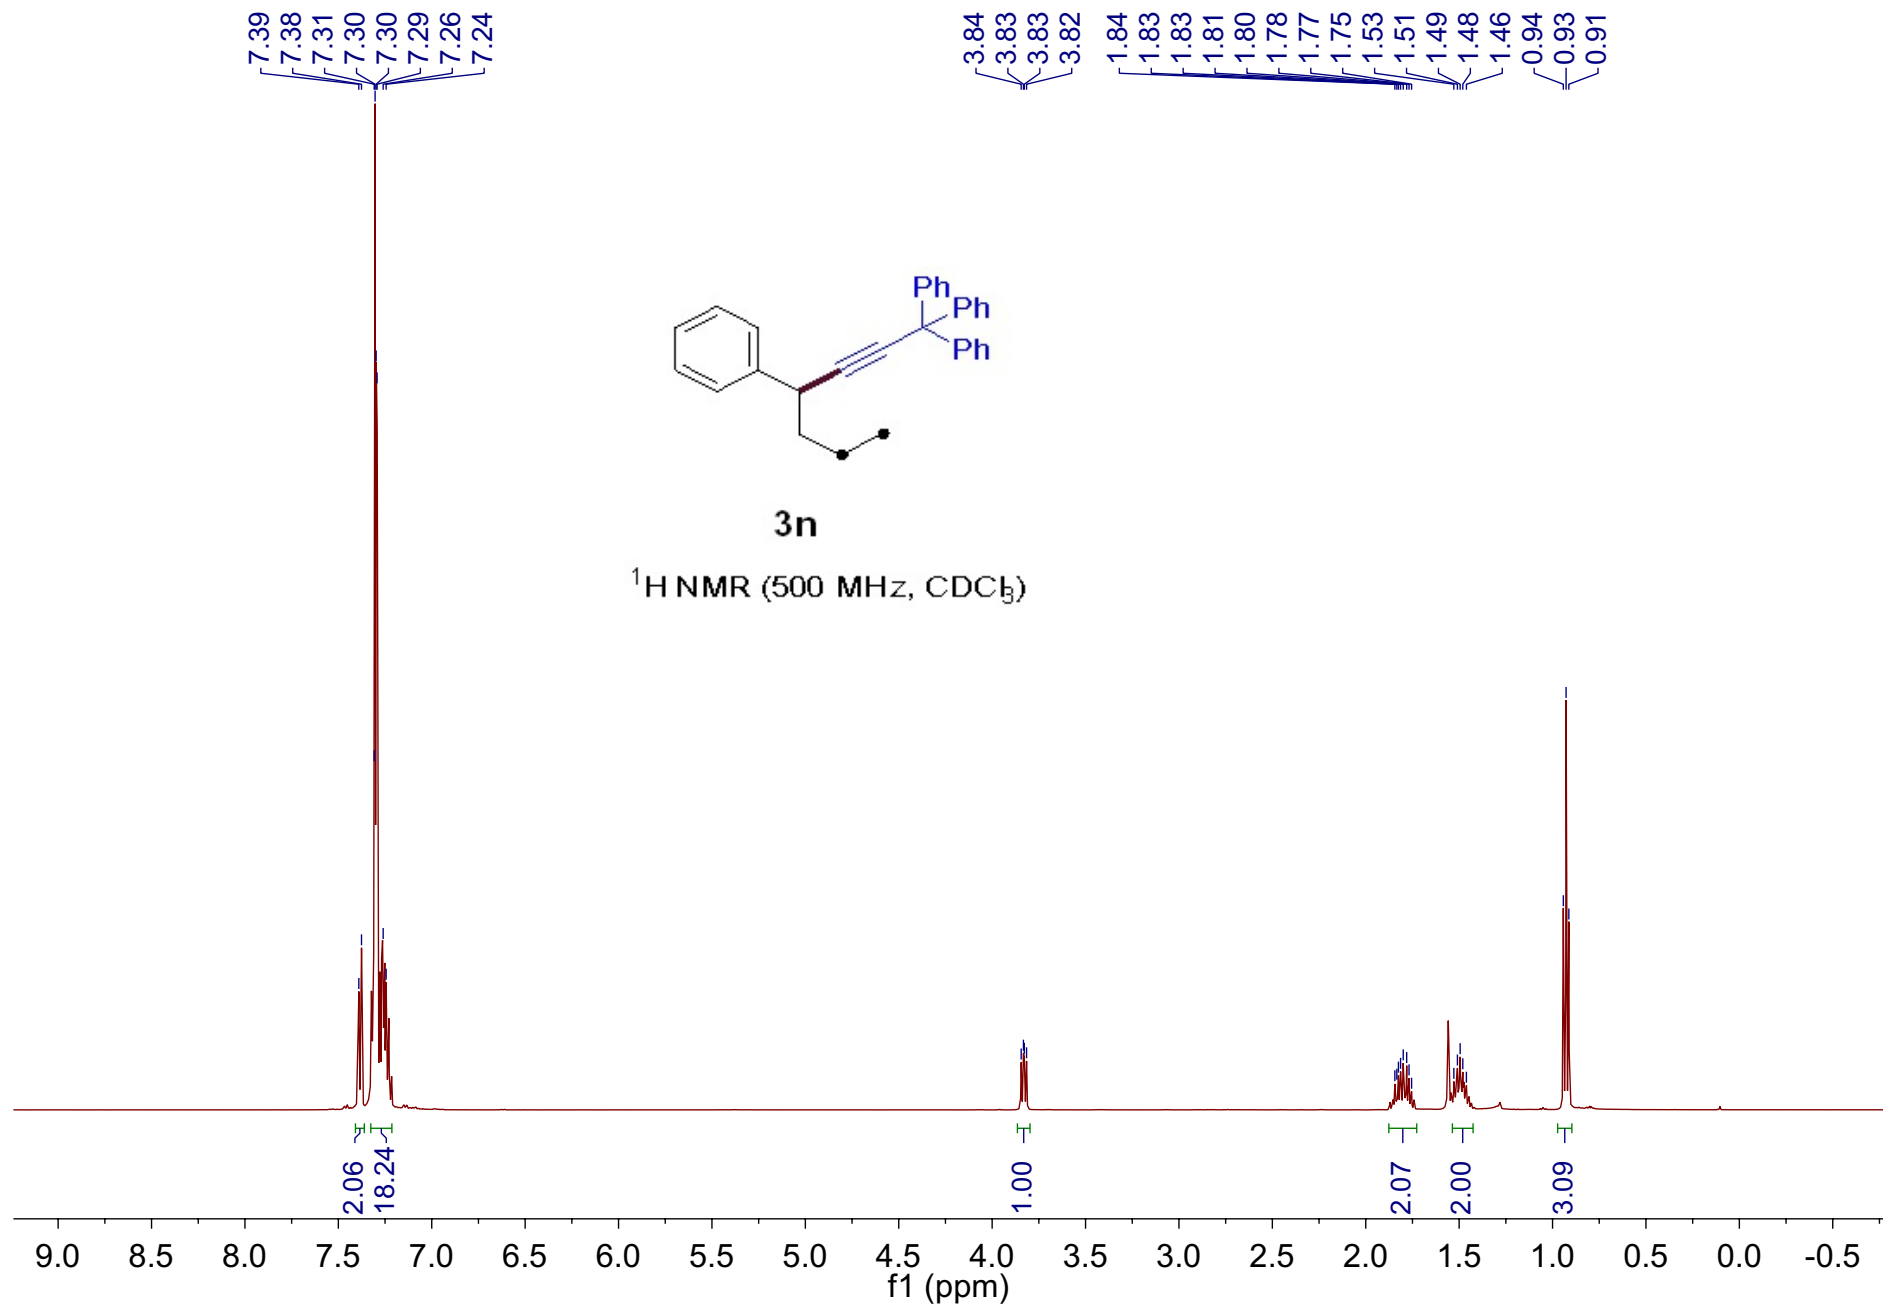

Supplementary Fig. 57.  $^1\text{H NMR}$  (500 MHz,  $\text{CDCl}_3$ ) spectra for compound **3n**

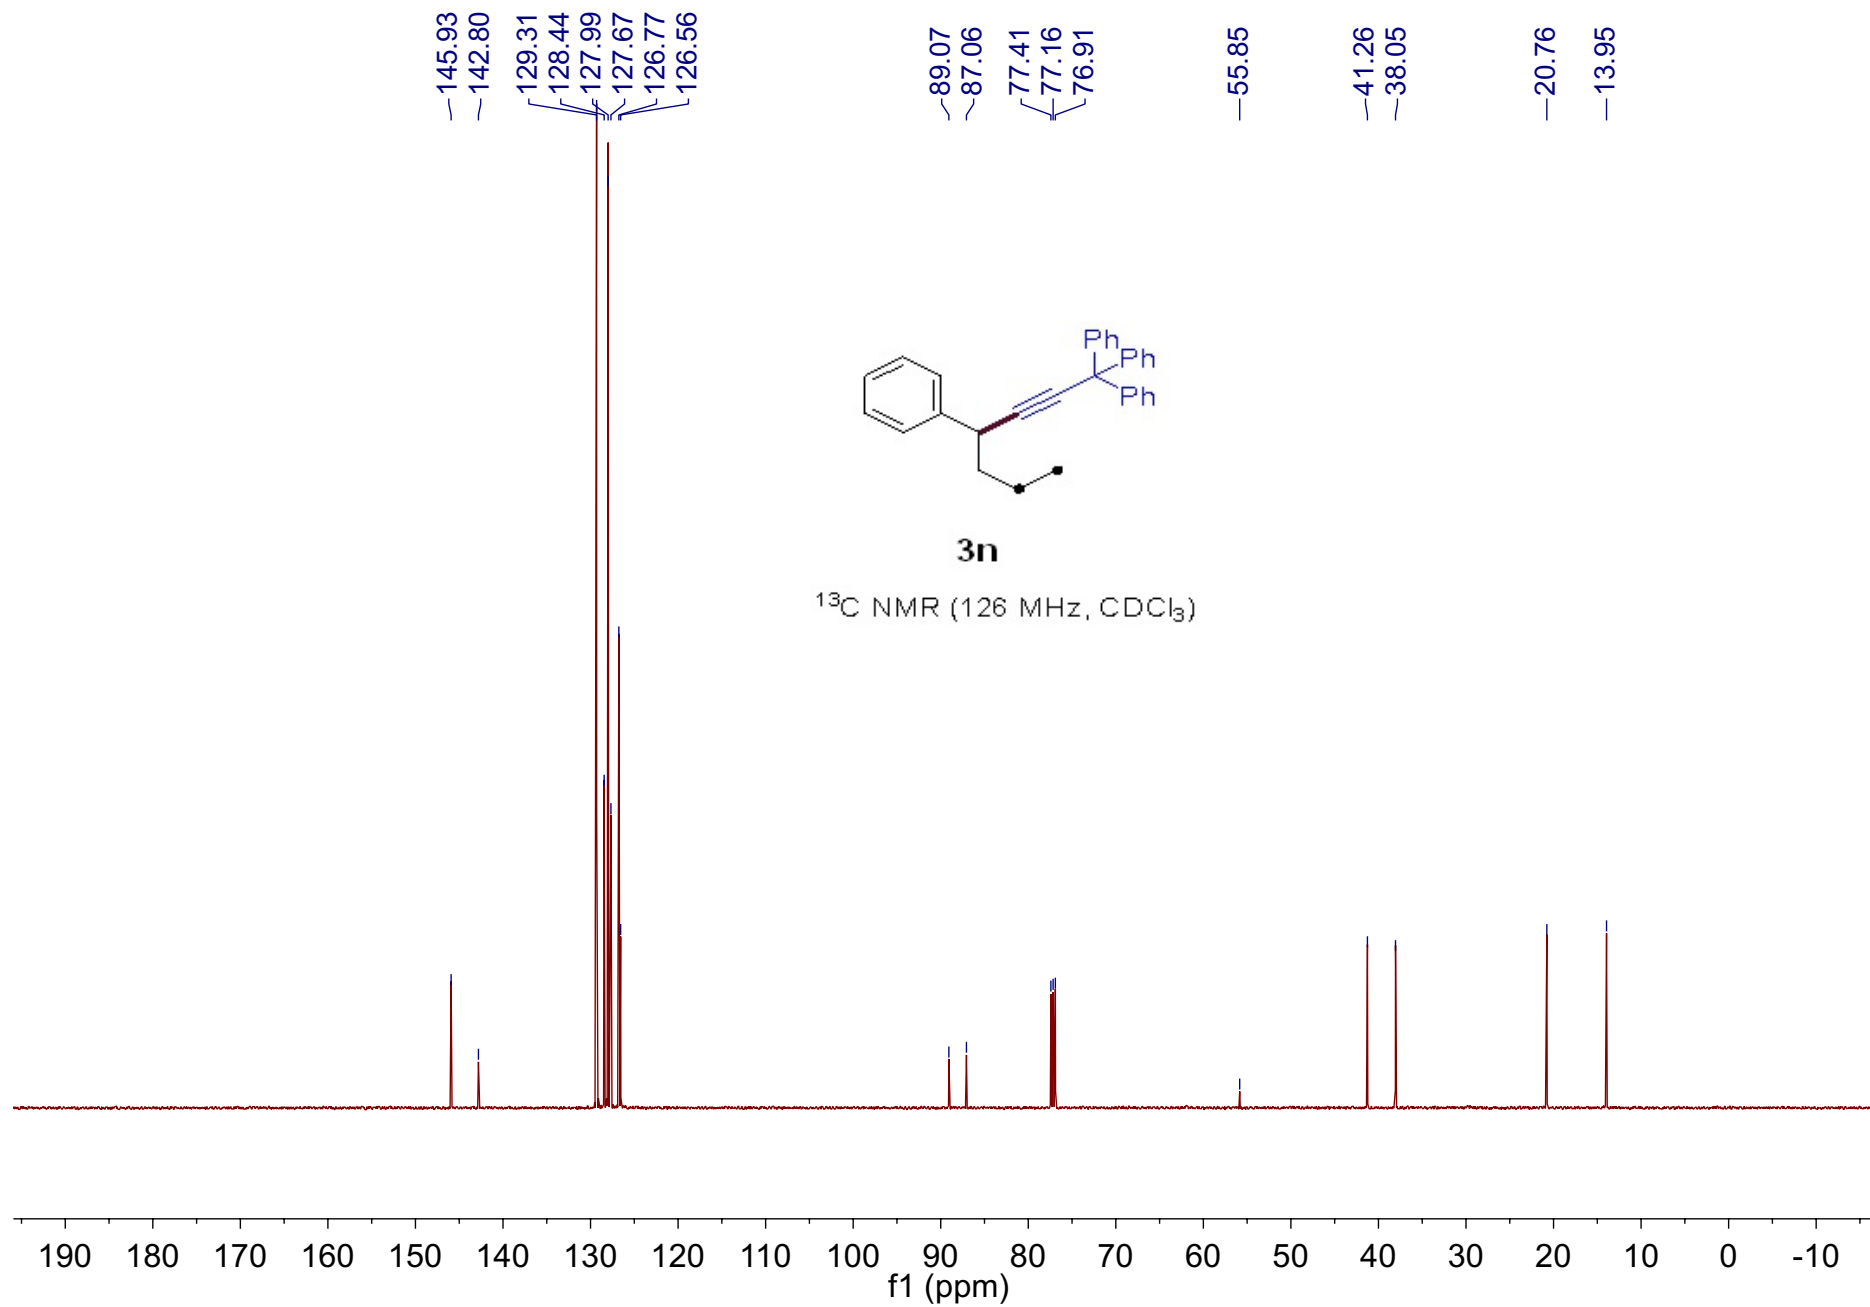

**Supplementary Fig. 58.**  $^{13}\text{C}$  NMR (126 MHz,  $\text{CDCl}_3$ ) spectra for compound **3n**

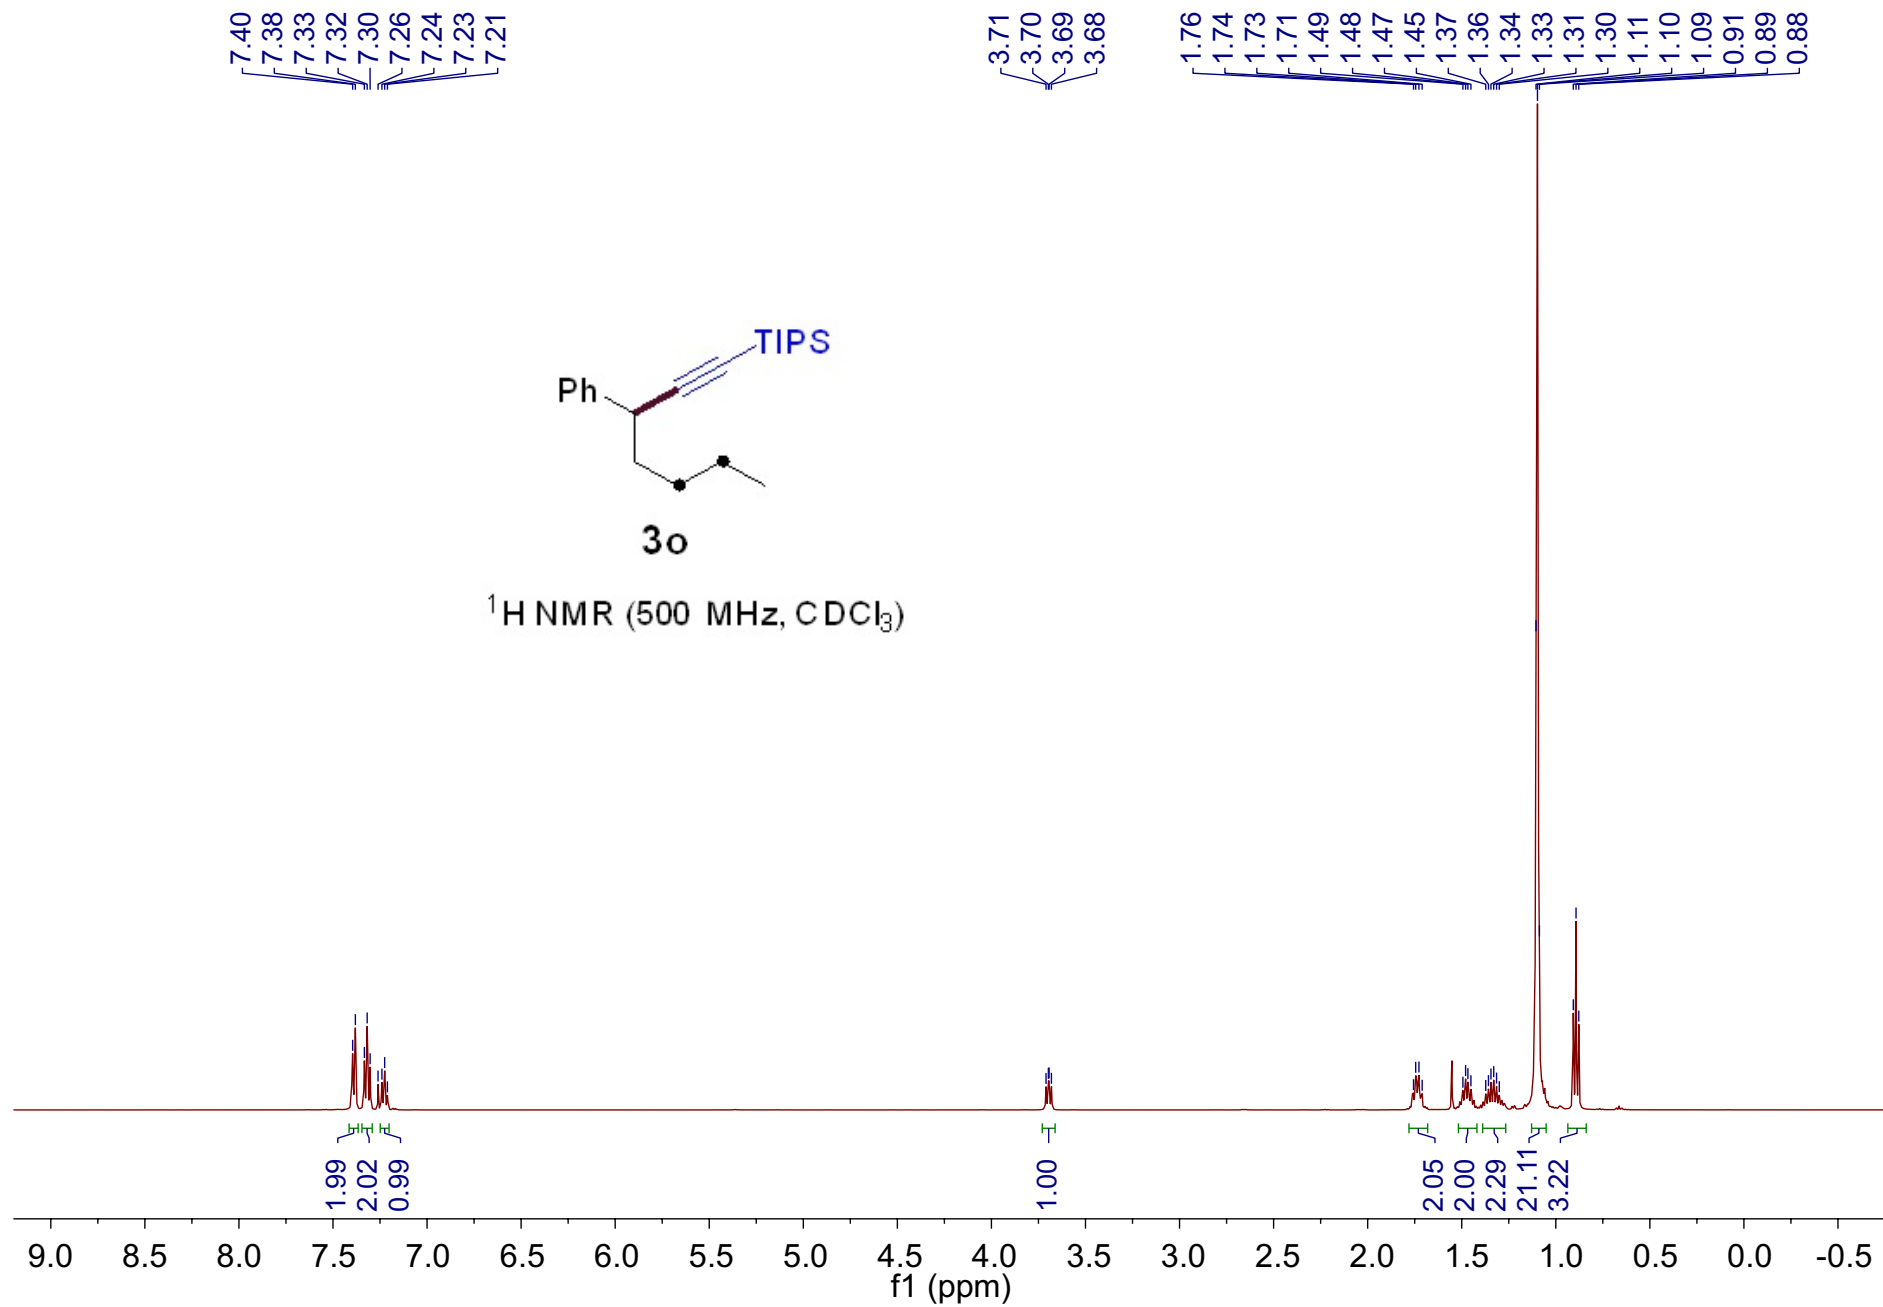

**Supplementary Fig. 59.** <sup>1</sup>H NMR (500 MHz, CDCl<sub>3</sub>) spectra for compound **3o**

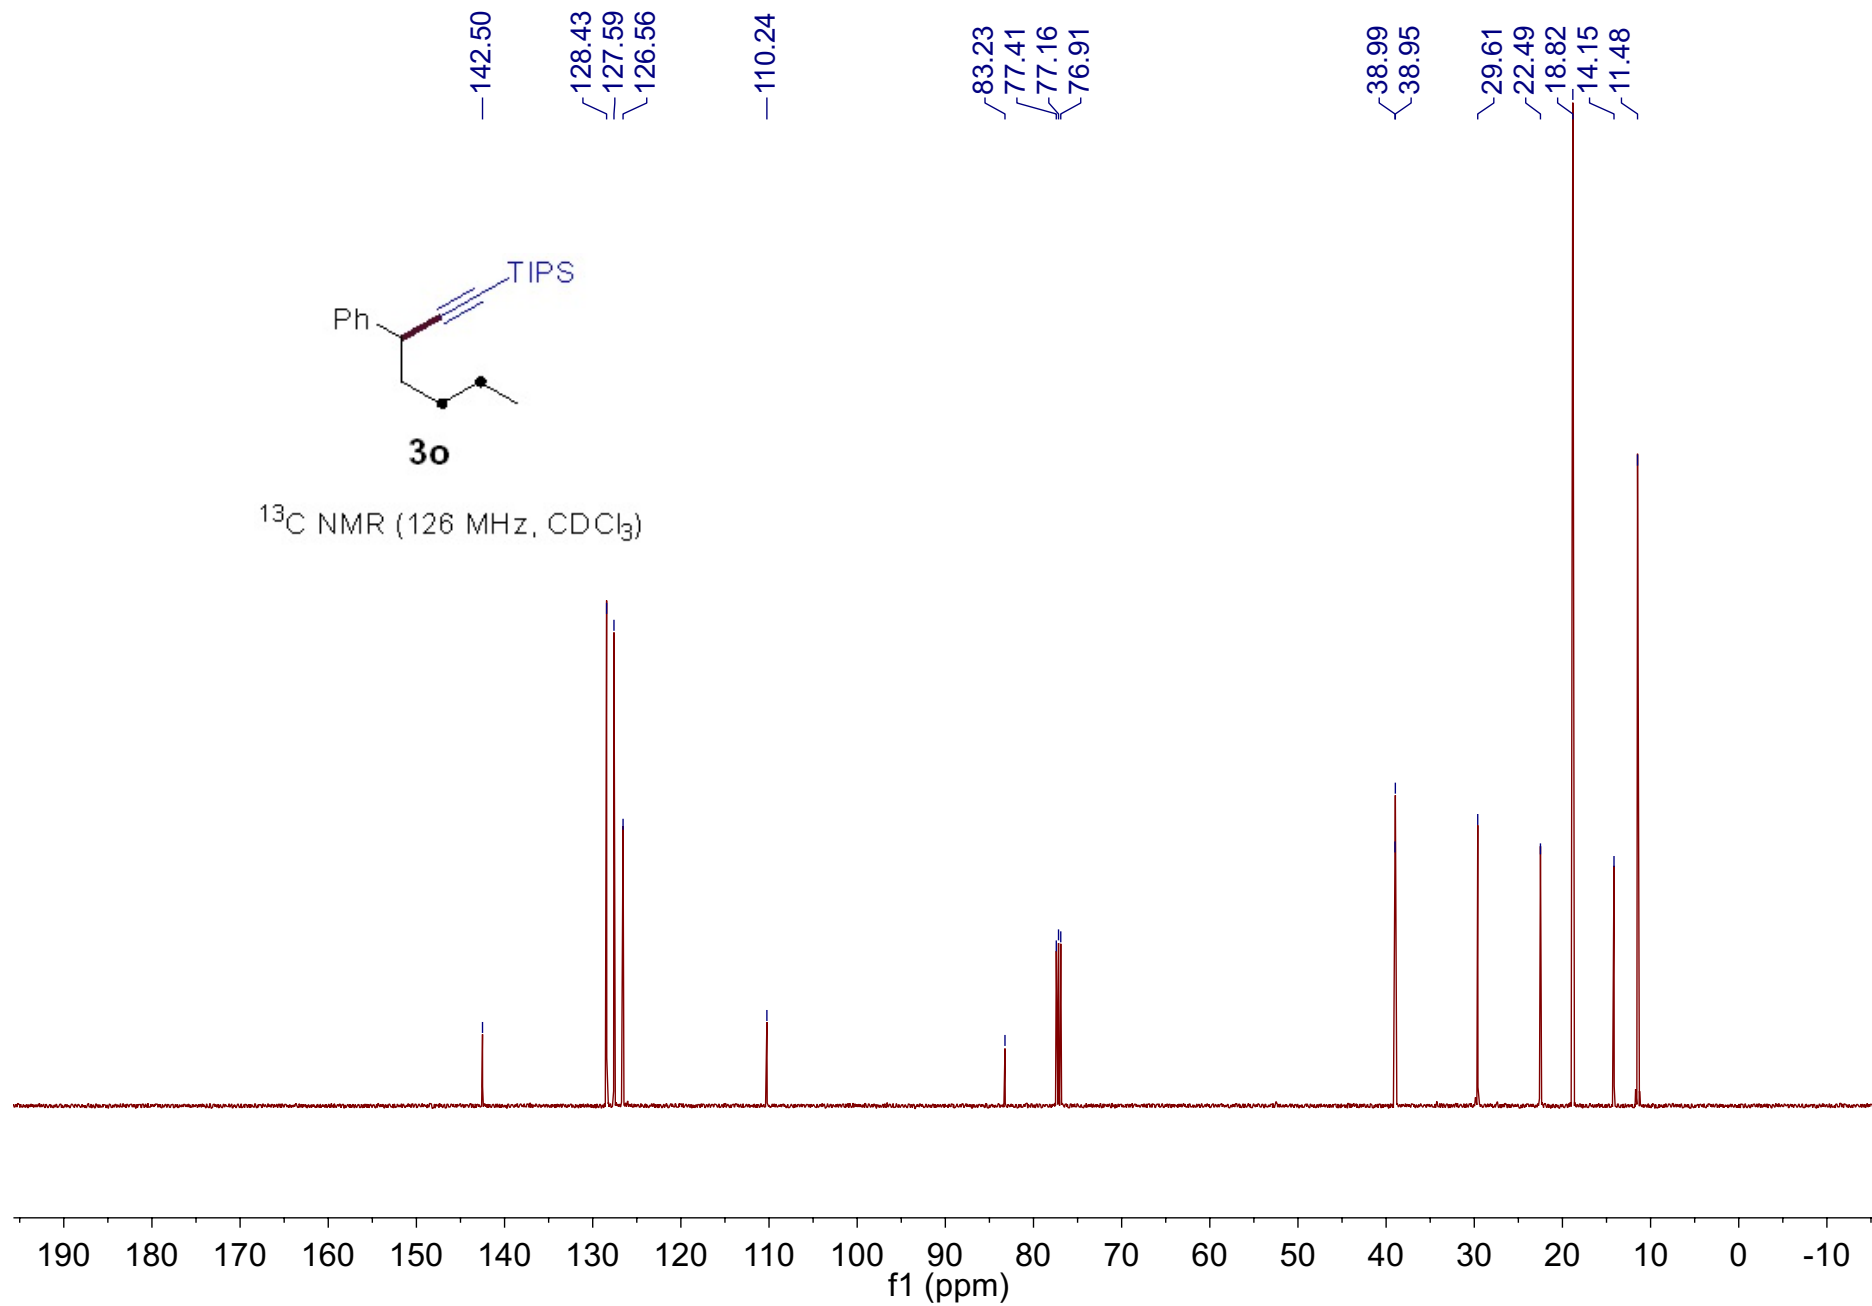

**Supplementary Fig. 60.**  $^{13}\text{C}$  NMR (126 MHz,  $\text{CDCl}_3$ ) spectra for compound **3o**



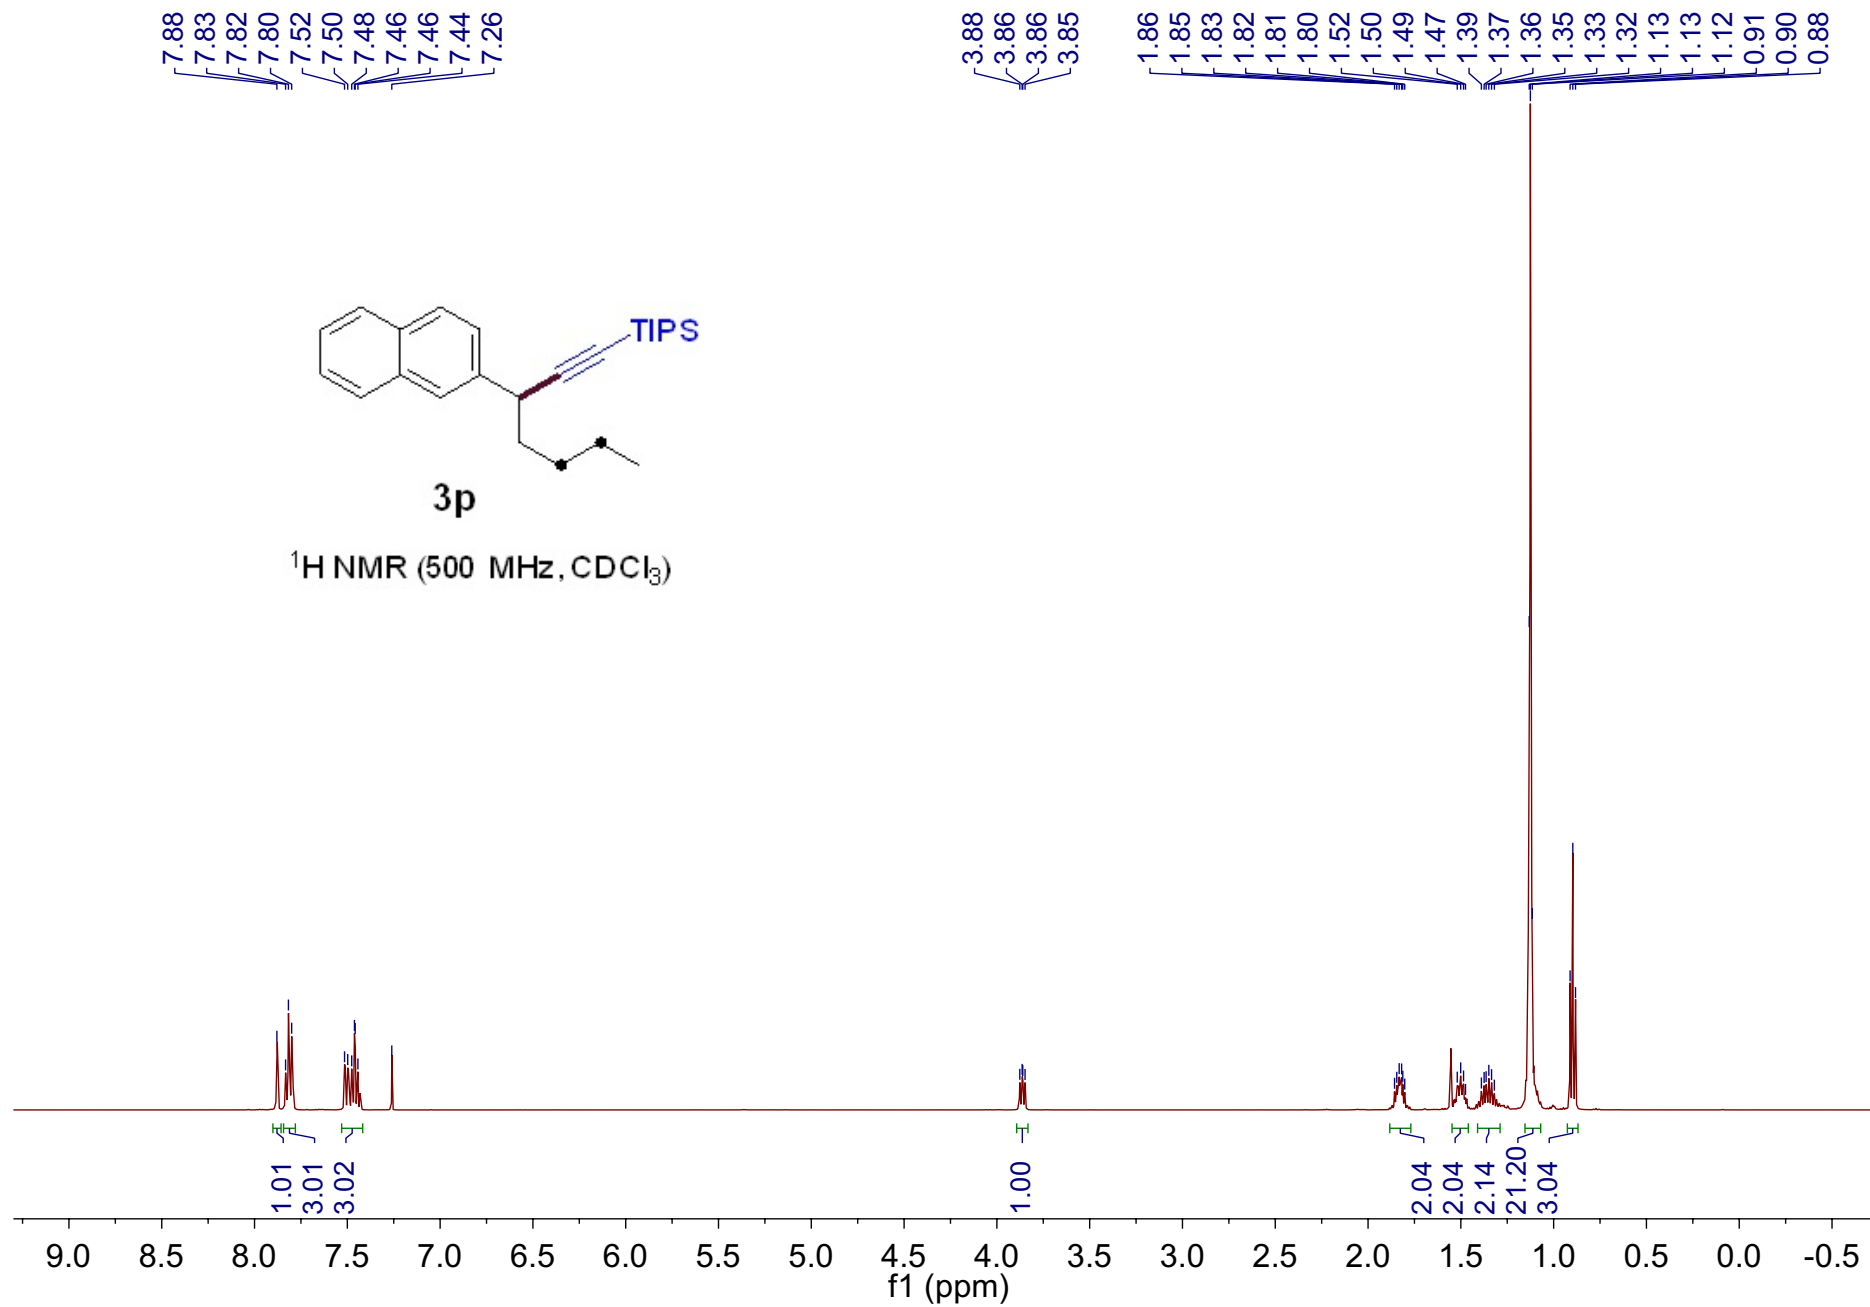

**Supplementary Fig. 61.**  $^1\text{H NMR}$  (500 MHz,  $\text{CDCl}_3$ ) spectra for compound **3p**

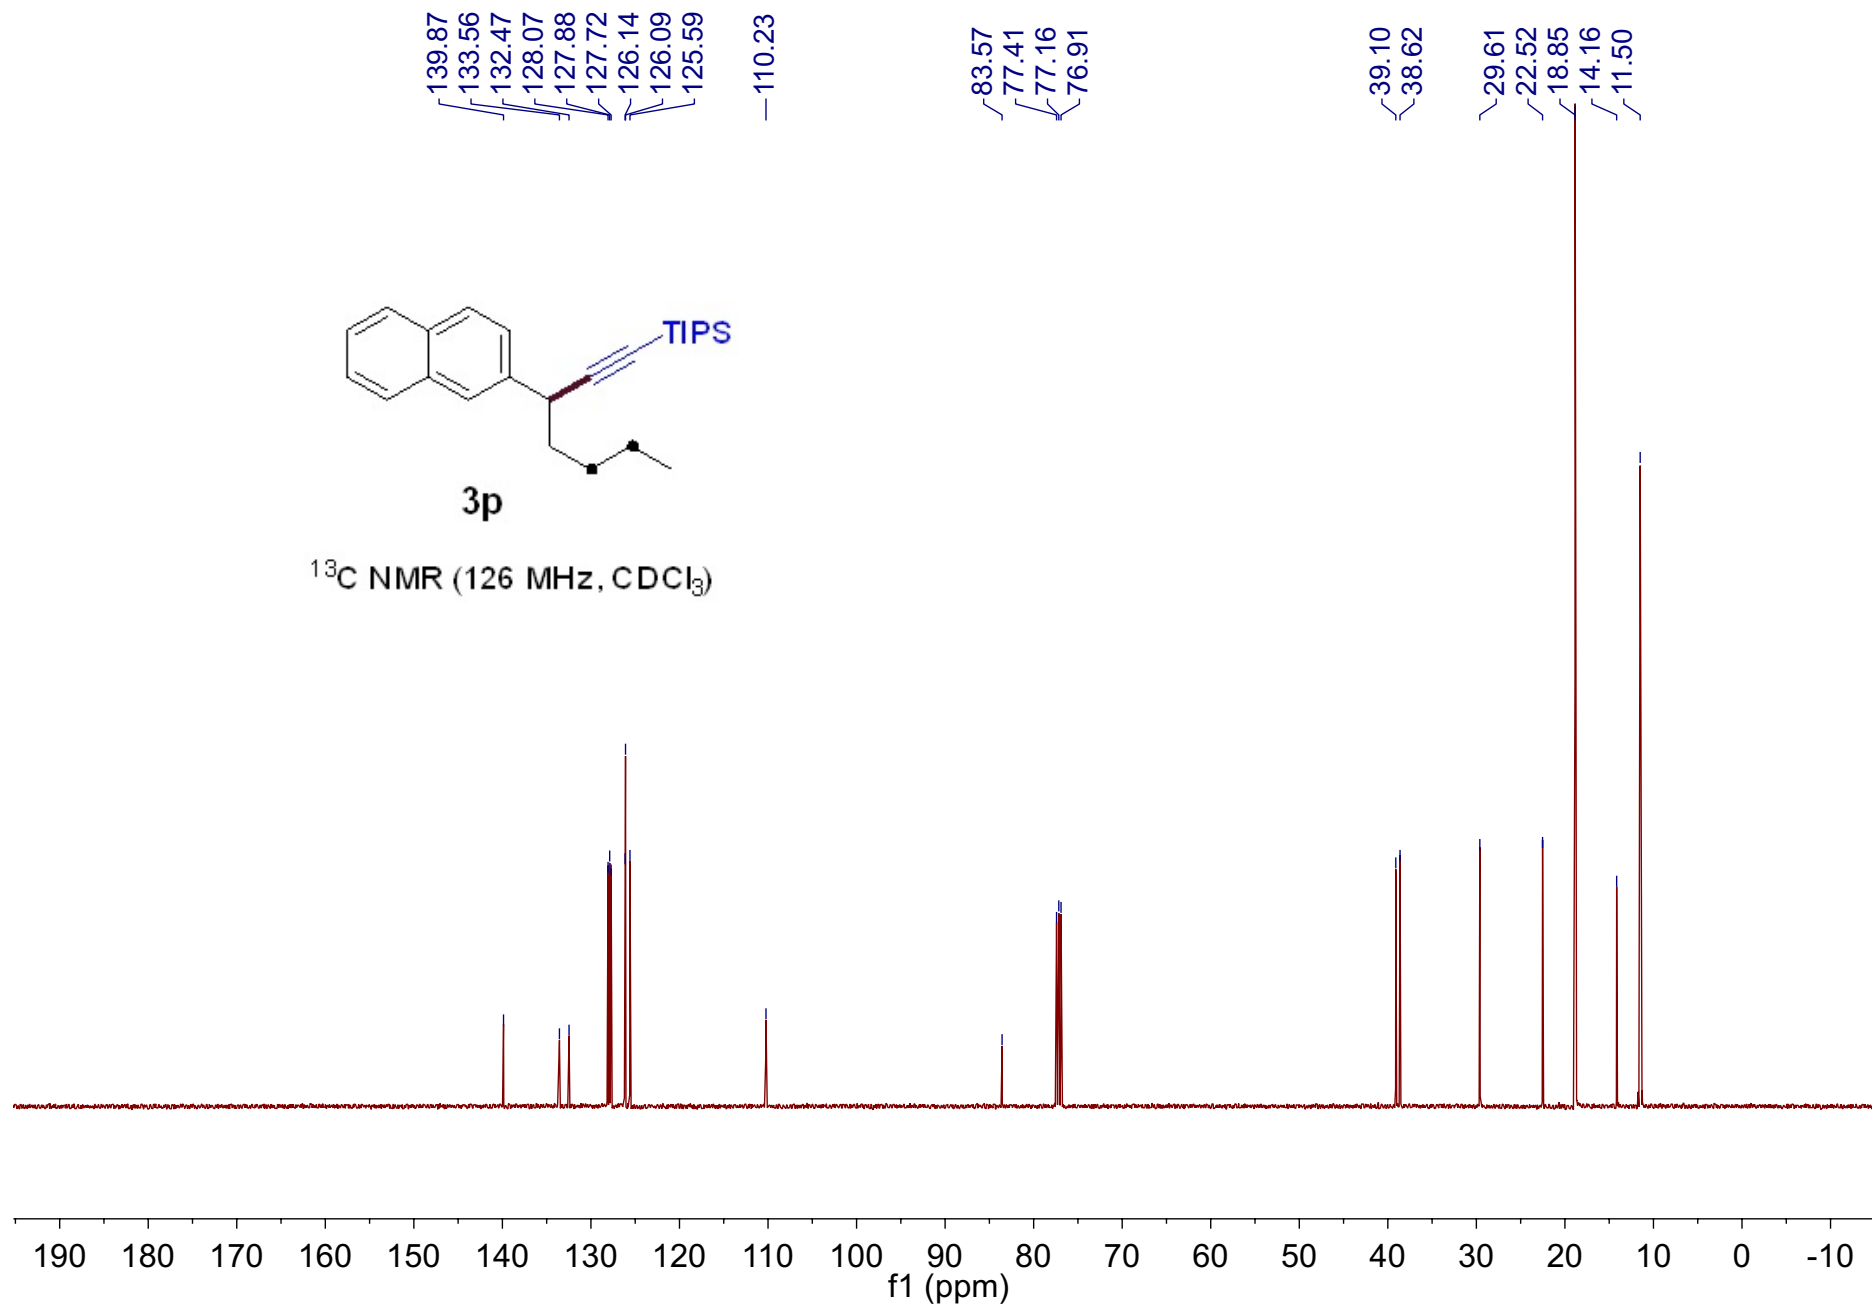

Supplementary Fig. 62.  $^{13}\text{C}$  NMR (126 MHz,  $\text{CDCl}_3$ ) spectra for compound **3p**

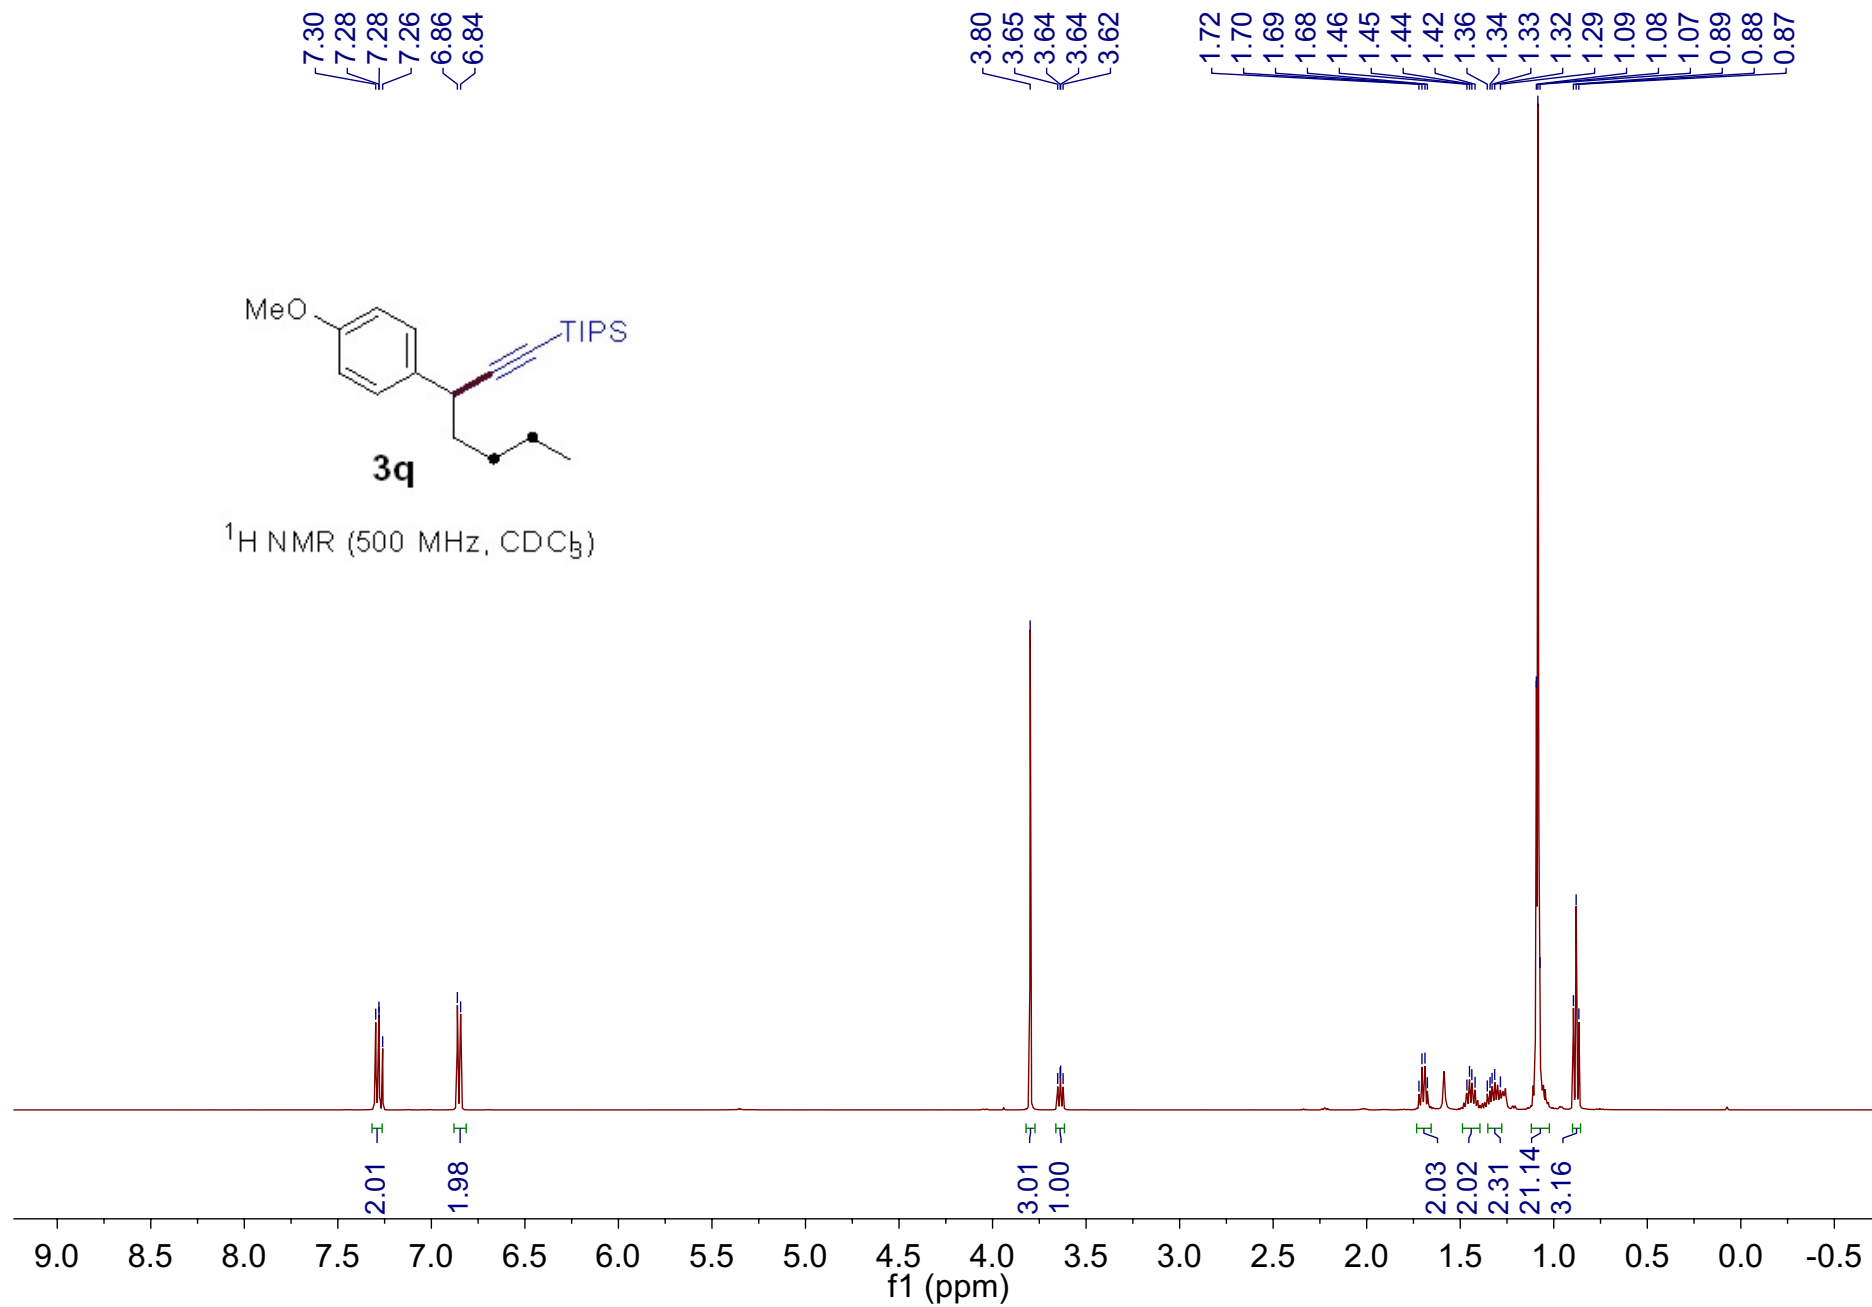

Supplementary Fig. 63.  $^1\text{H NMR}$  (500 MHz,  $\text{CDCl}_3$ ) spectra for compound **3q**

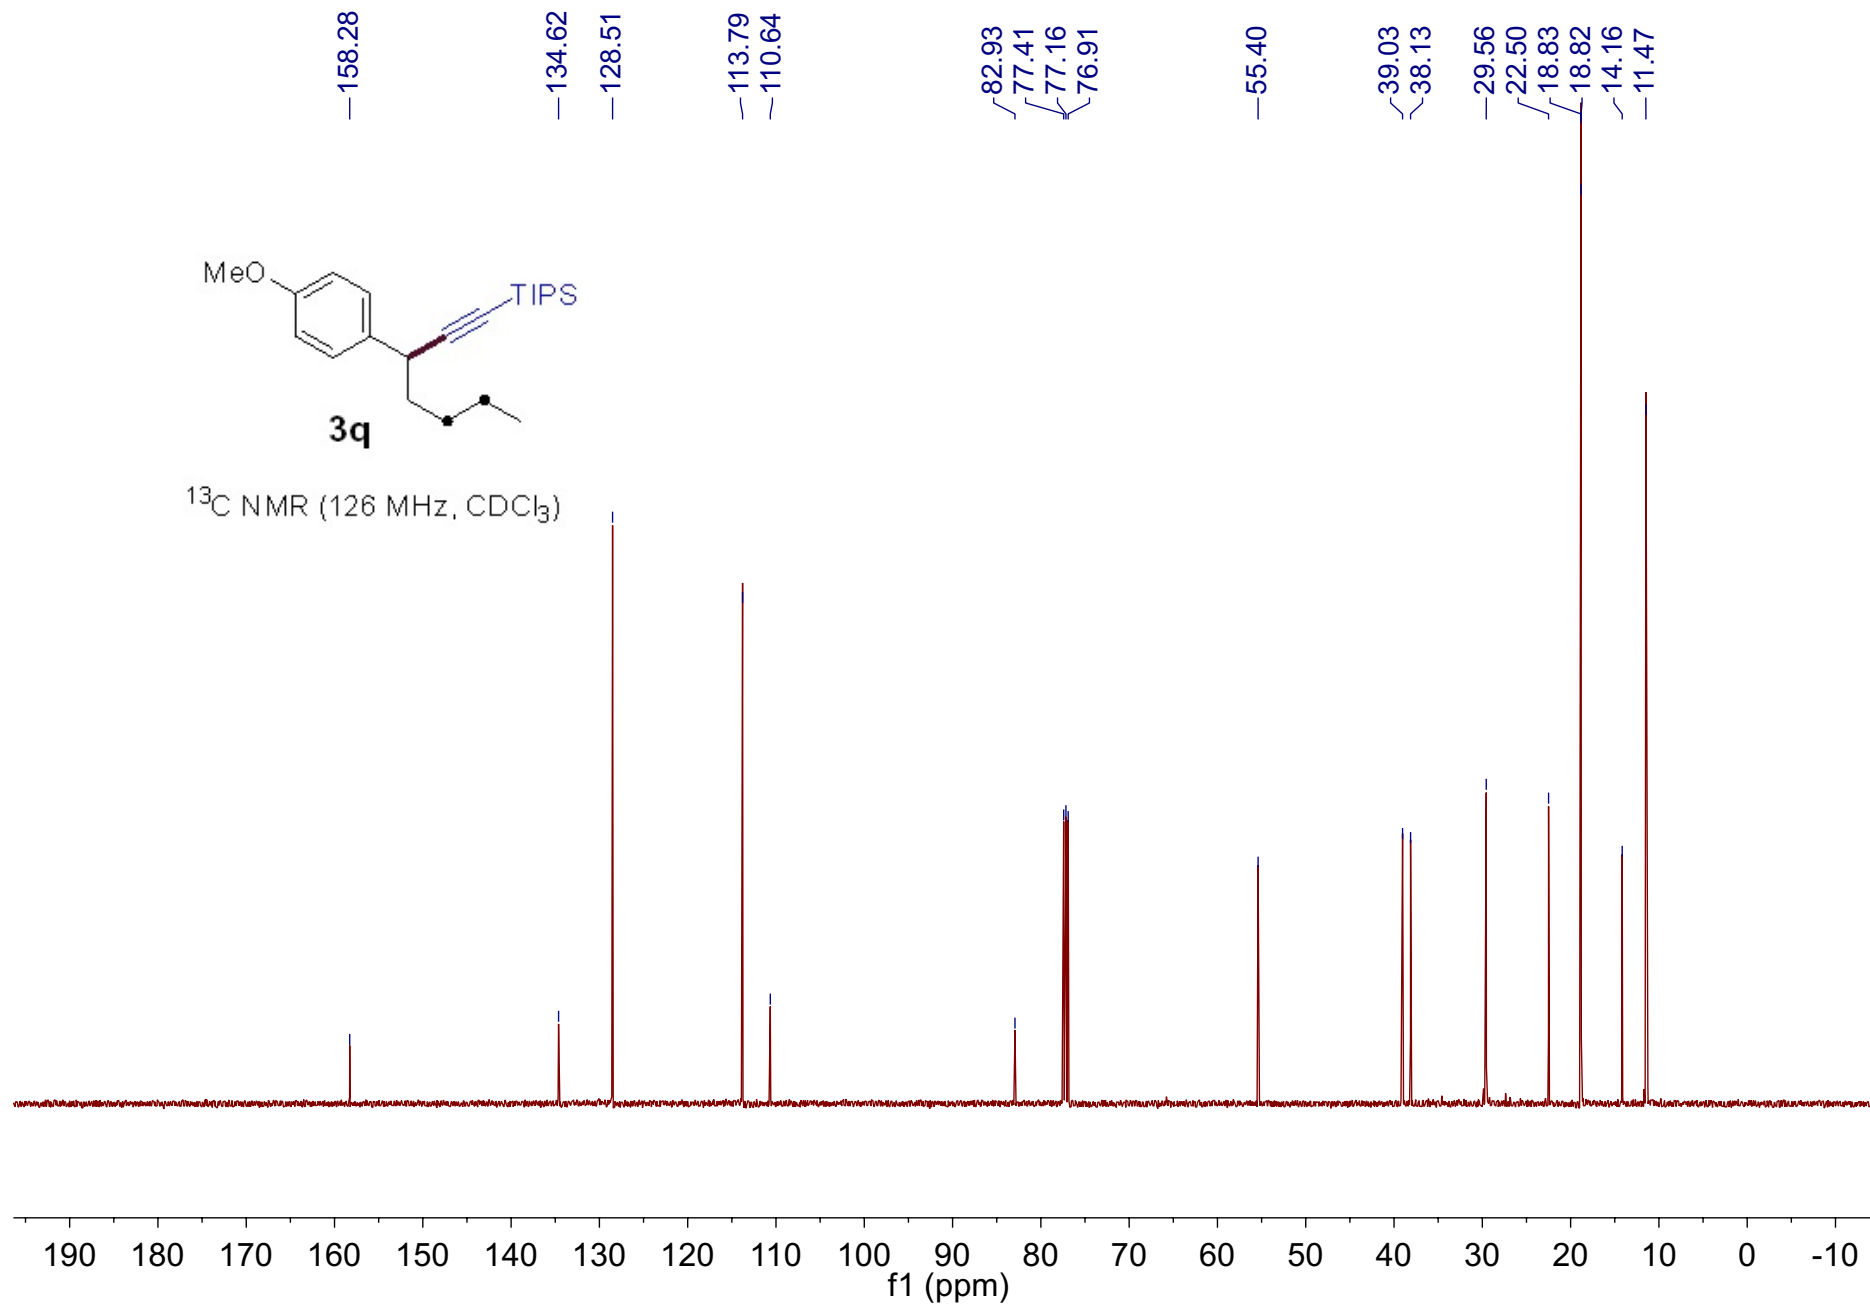

**Supplementary Fig. 64.**  $^{13}\text{C}$  NMR (126 MHz,  $\text{CDCl}_3$ ) spectra for compound **3q**

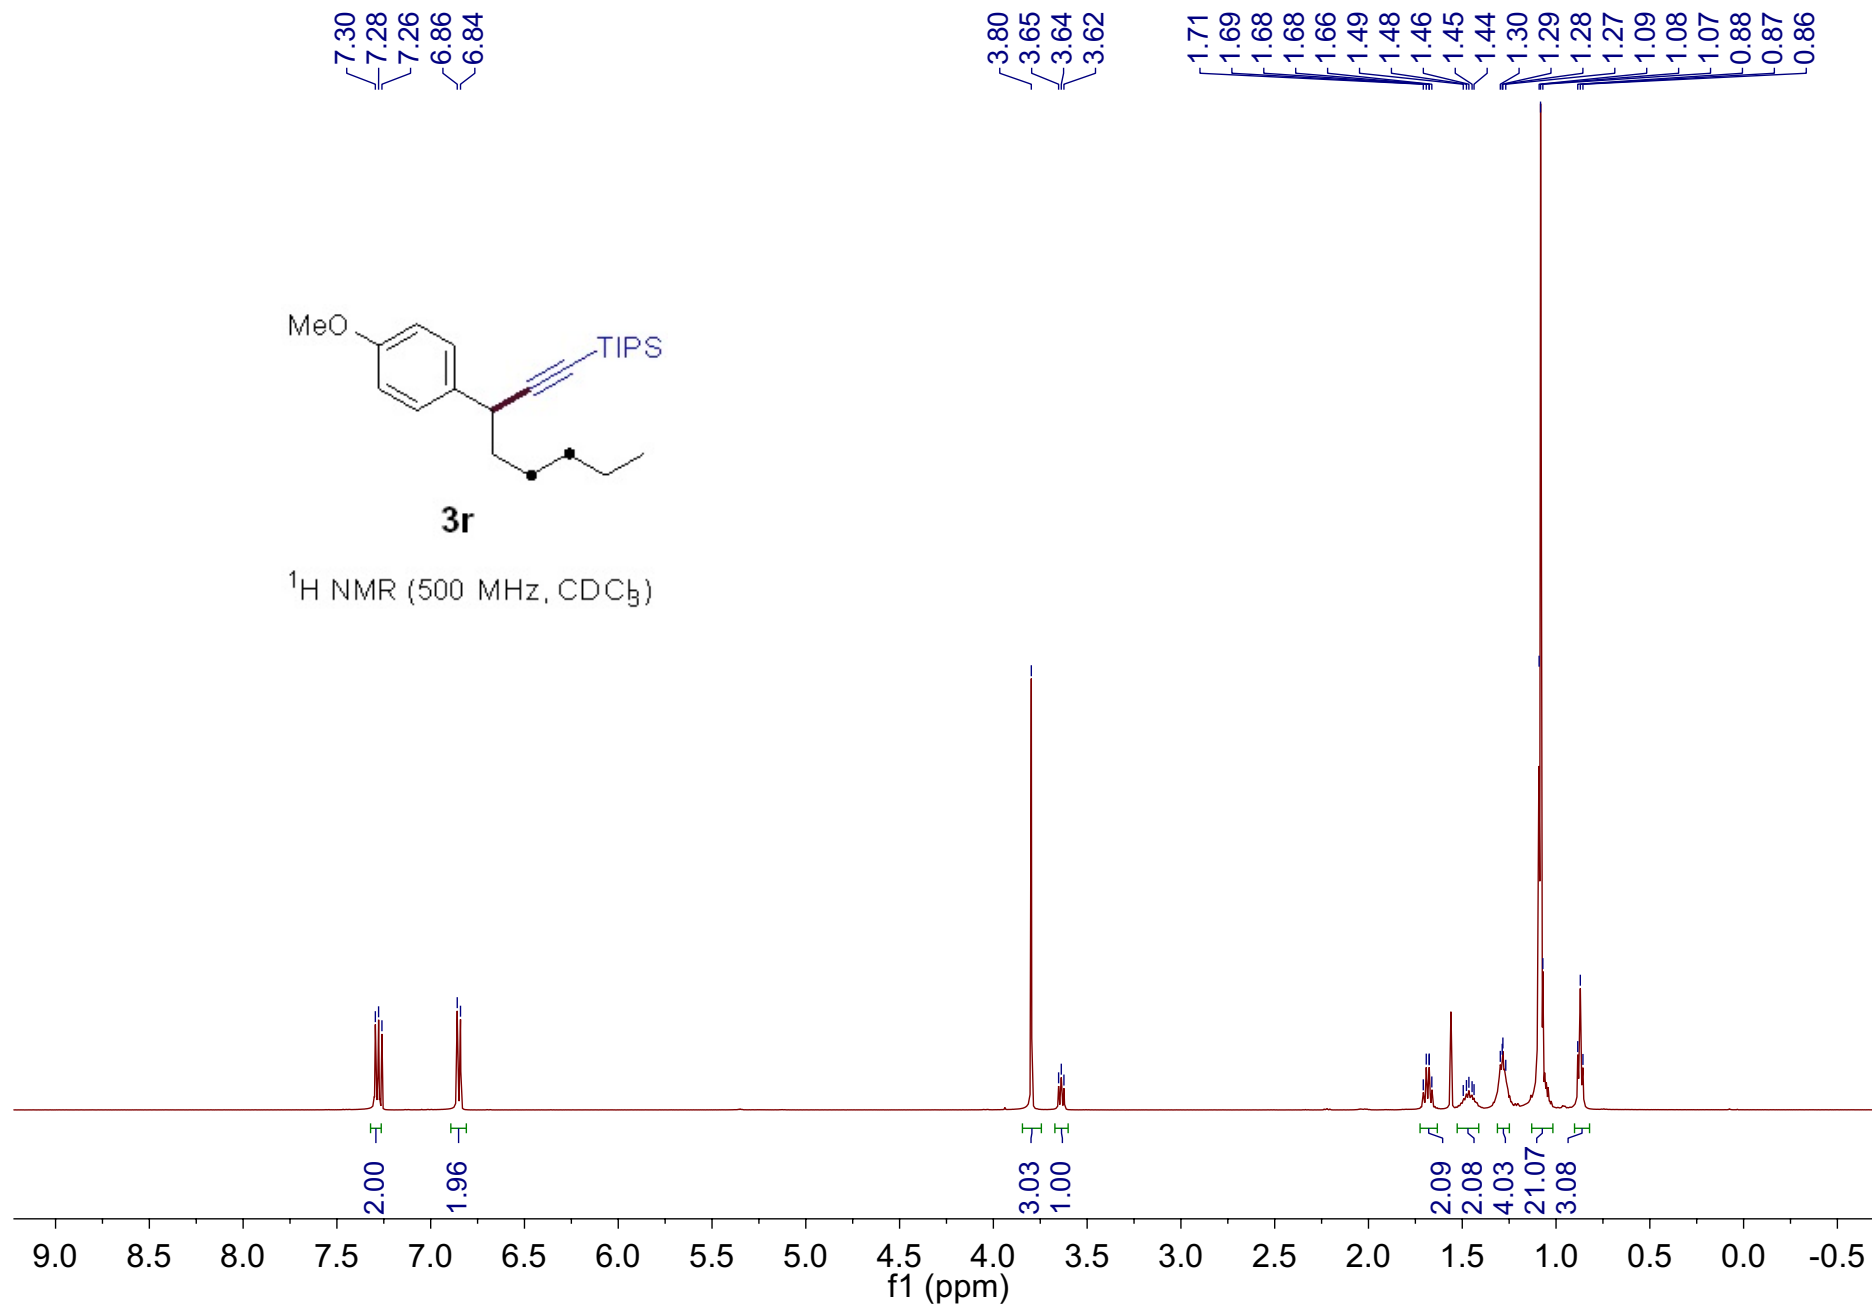

Supplementary Fig. 65.  $^1\text{H}$  NMR (500 MHz,  $\text{CDCl}_3$ ) spectra for compound **3r**

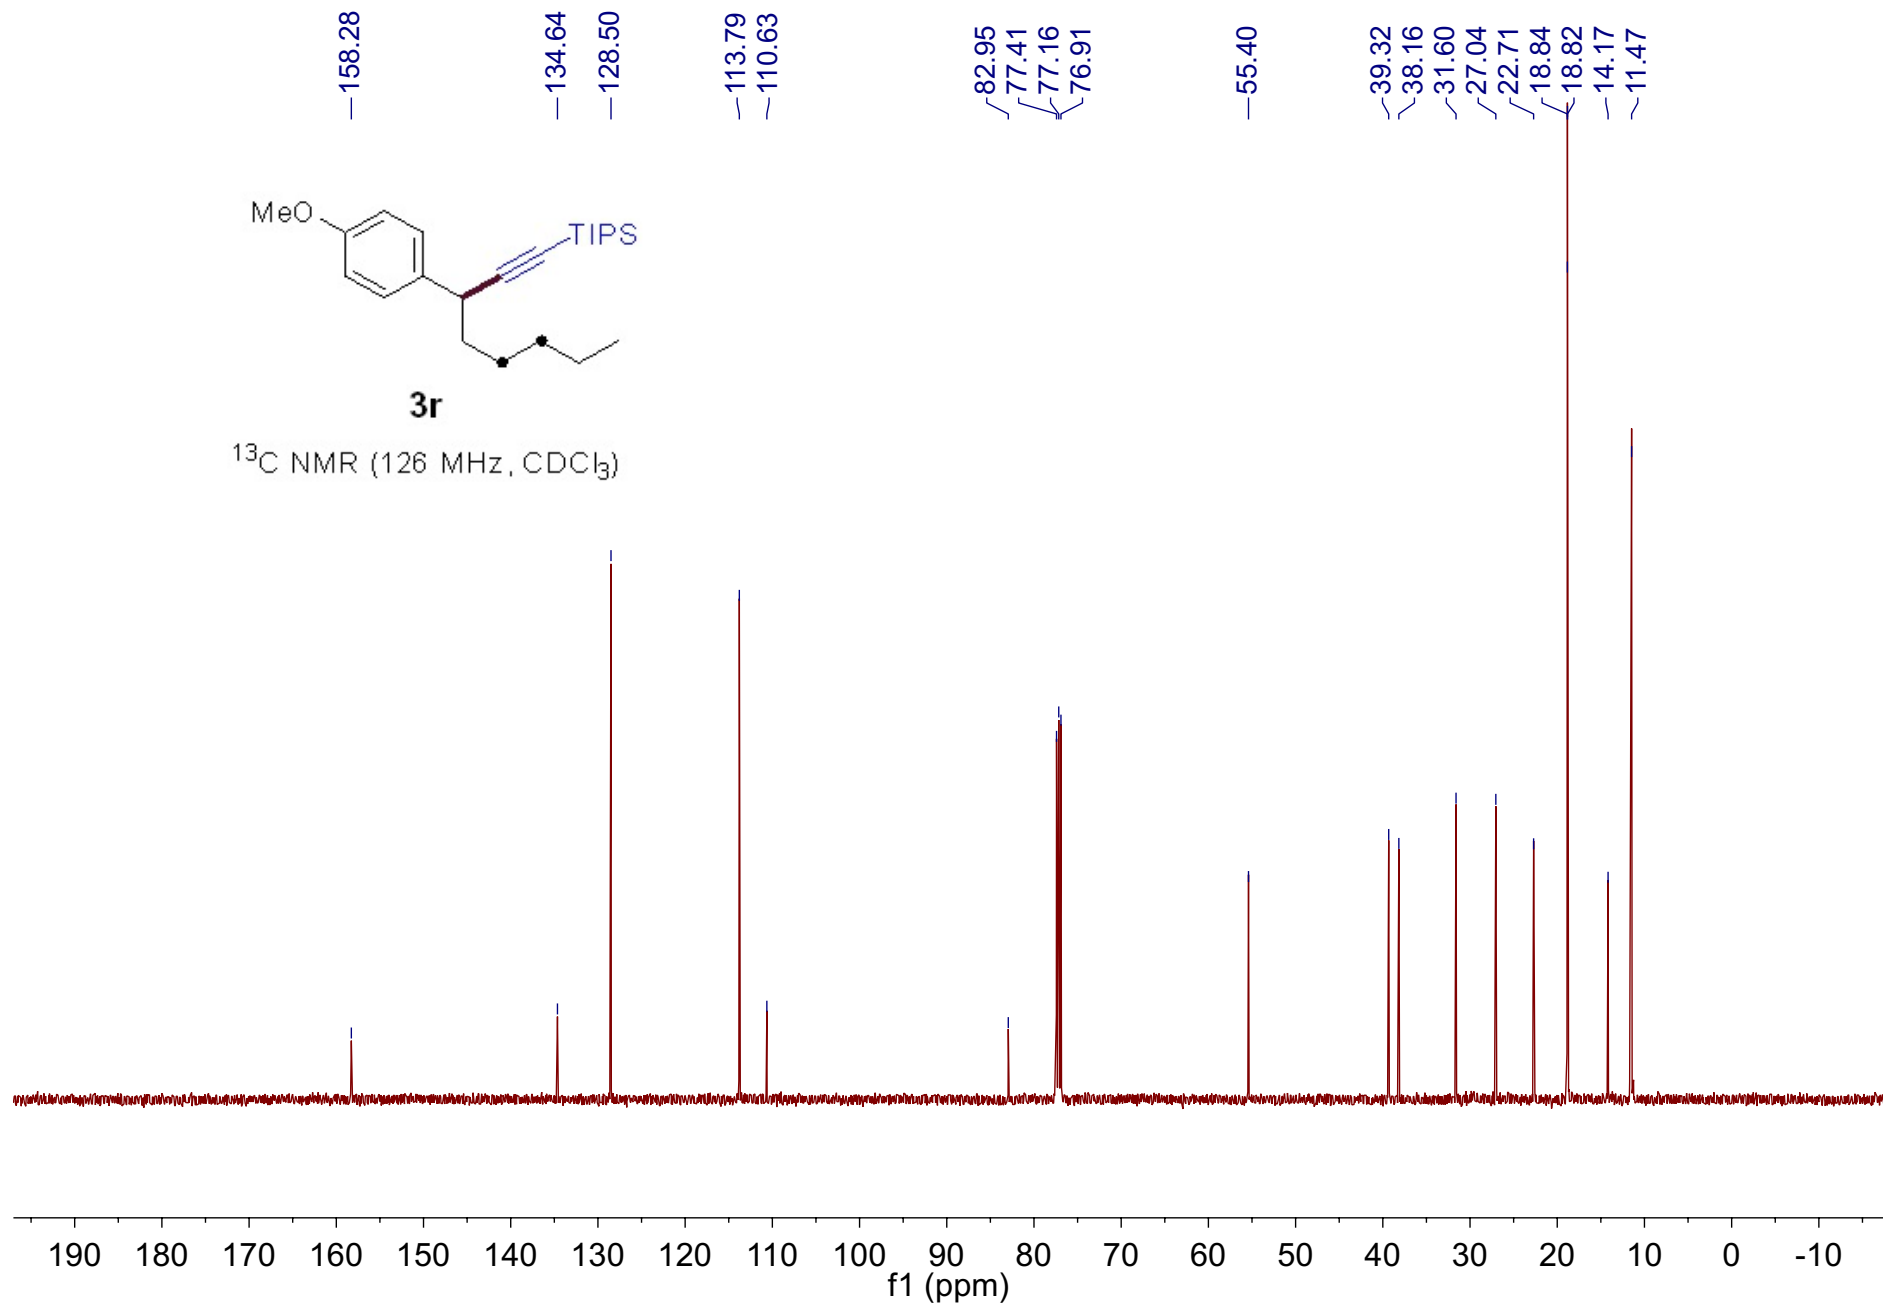

Supplementary Fig. 66.  $^{13}\text{C}$  NMR (126 MHz,  $\text{CDCl}_3$ ) spectra for compound **3r**

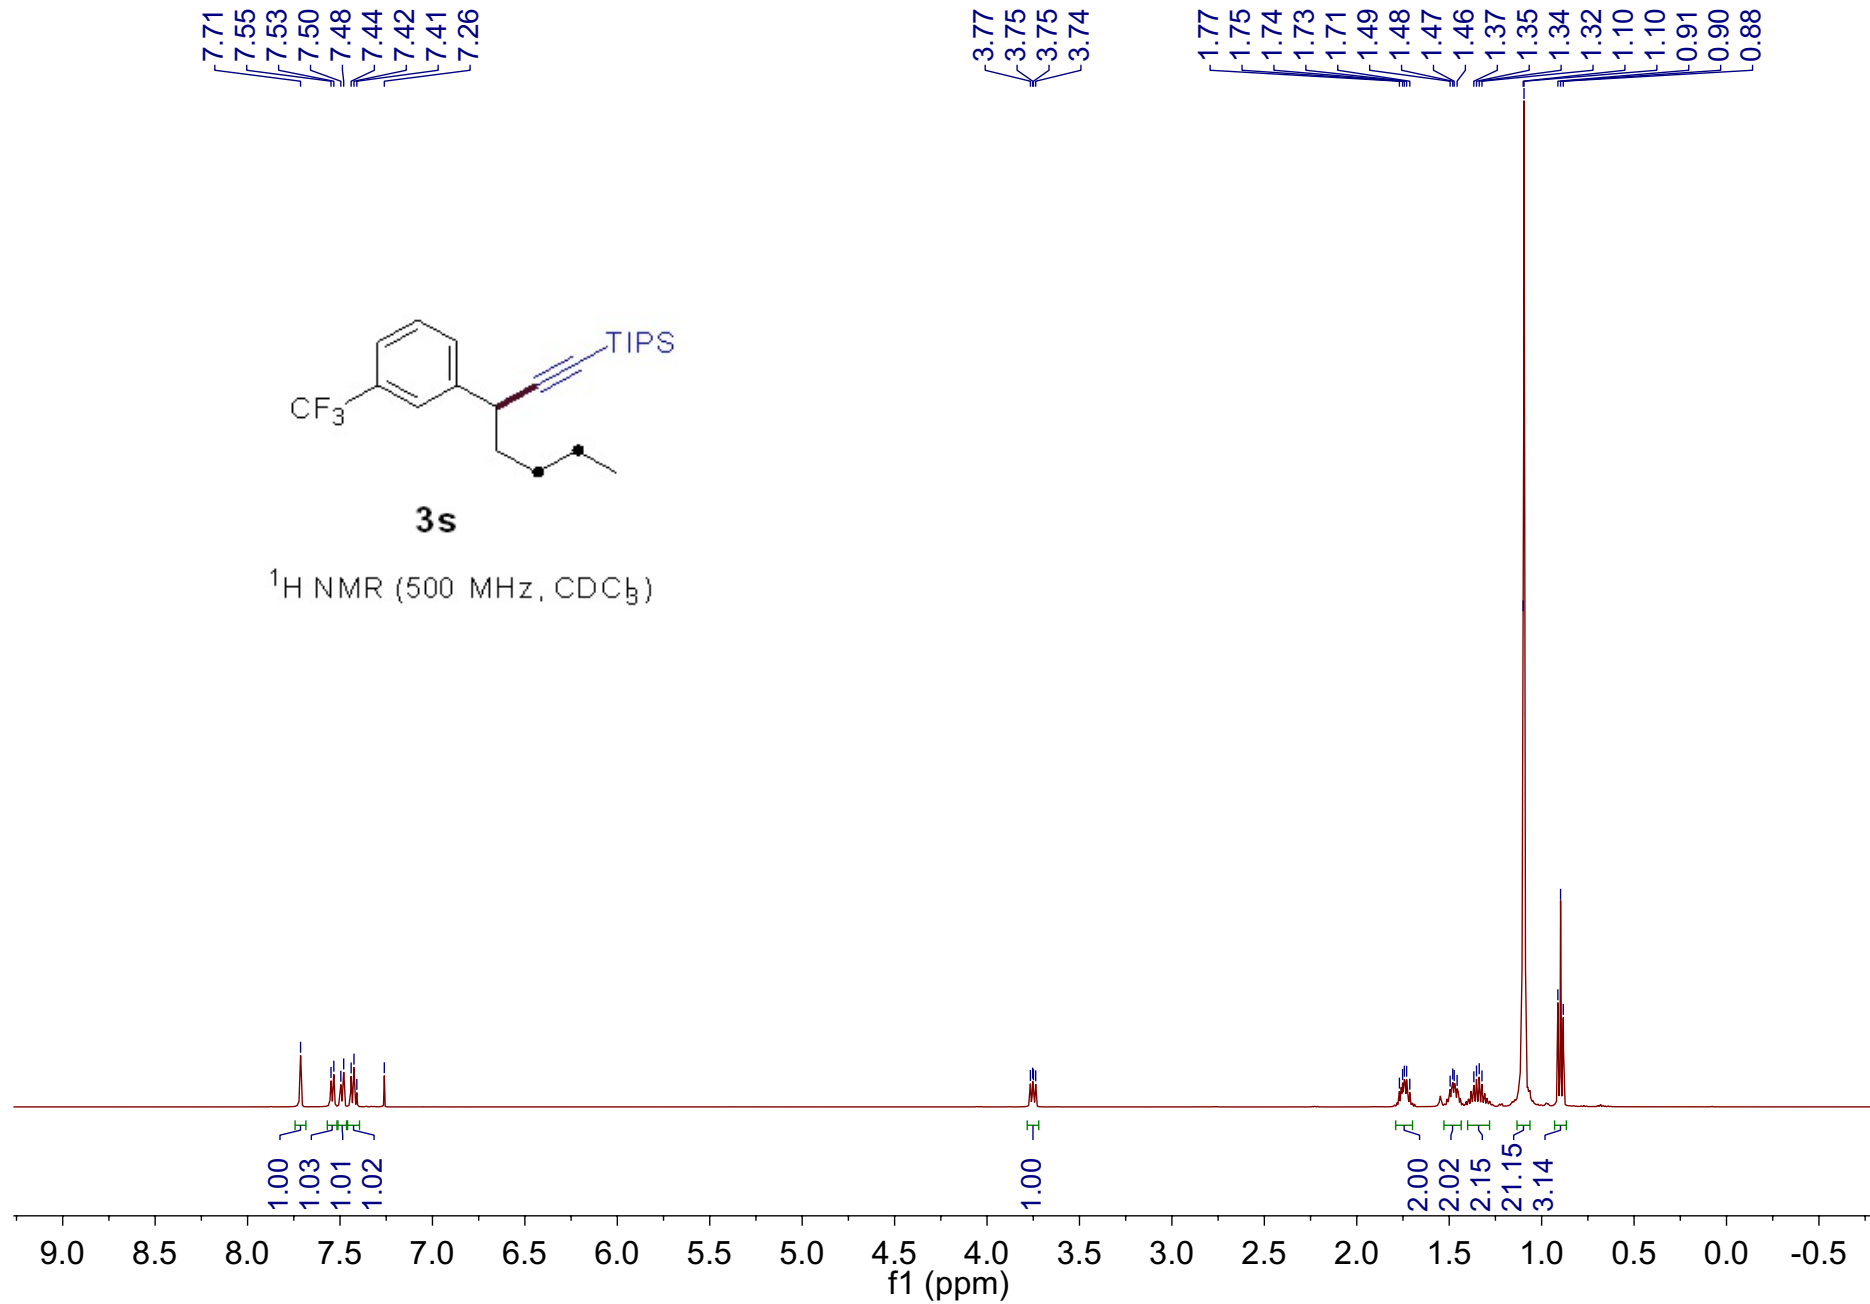

Supplementary Fig. 67.  $^1\text{H NMR}$  (500 MHz,  $\text{CDCl}_3$ ) spectra for compound **3s**

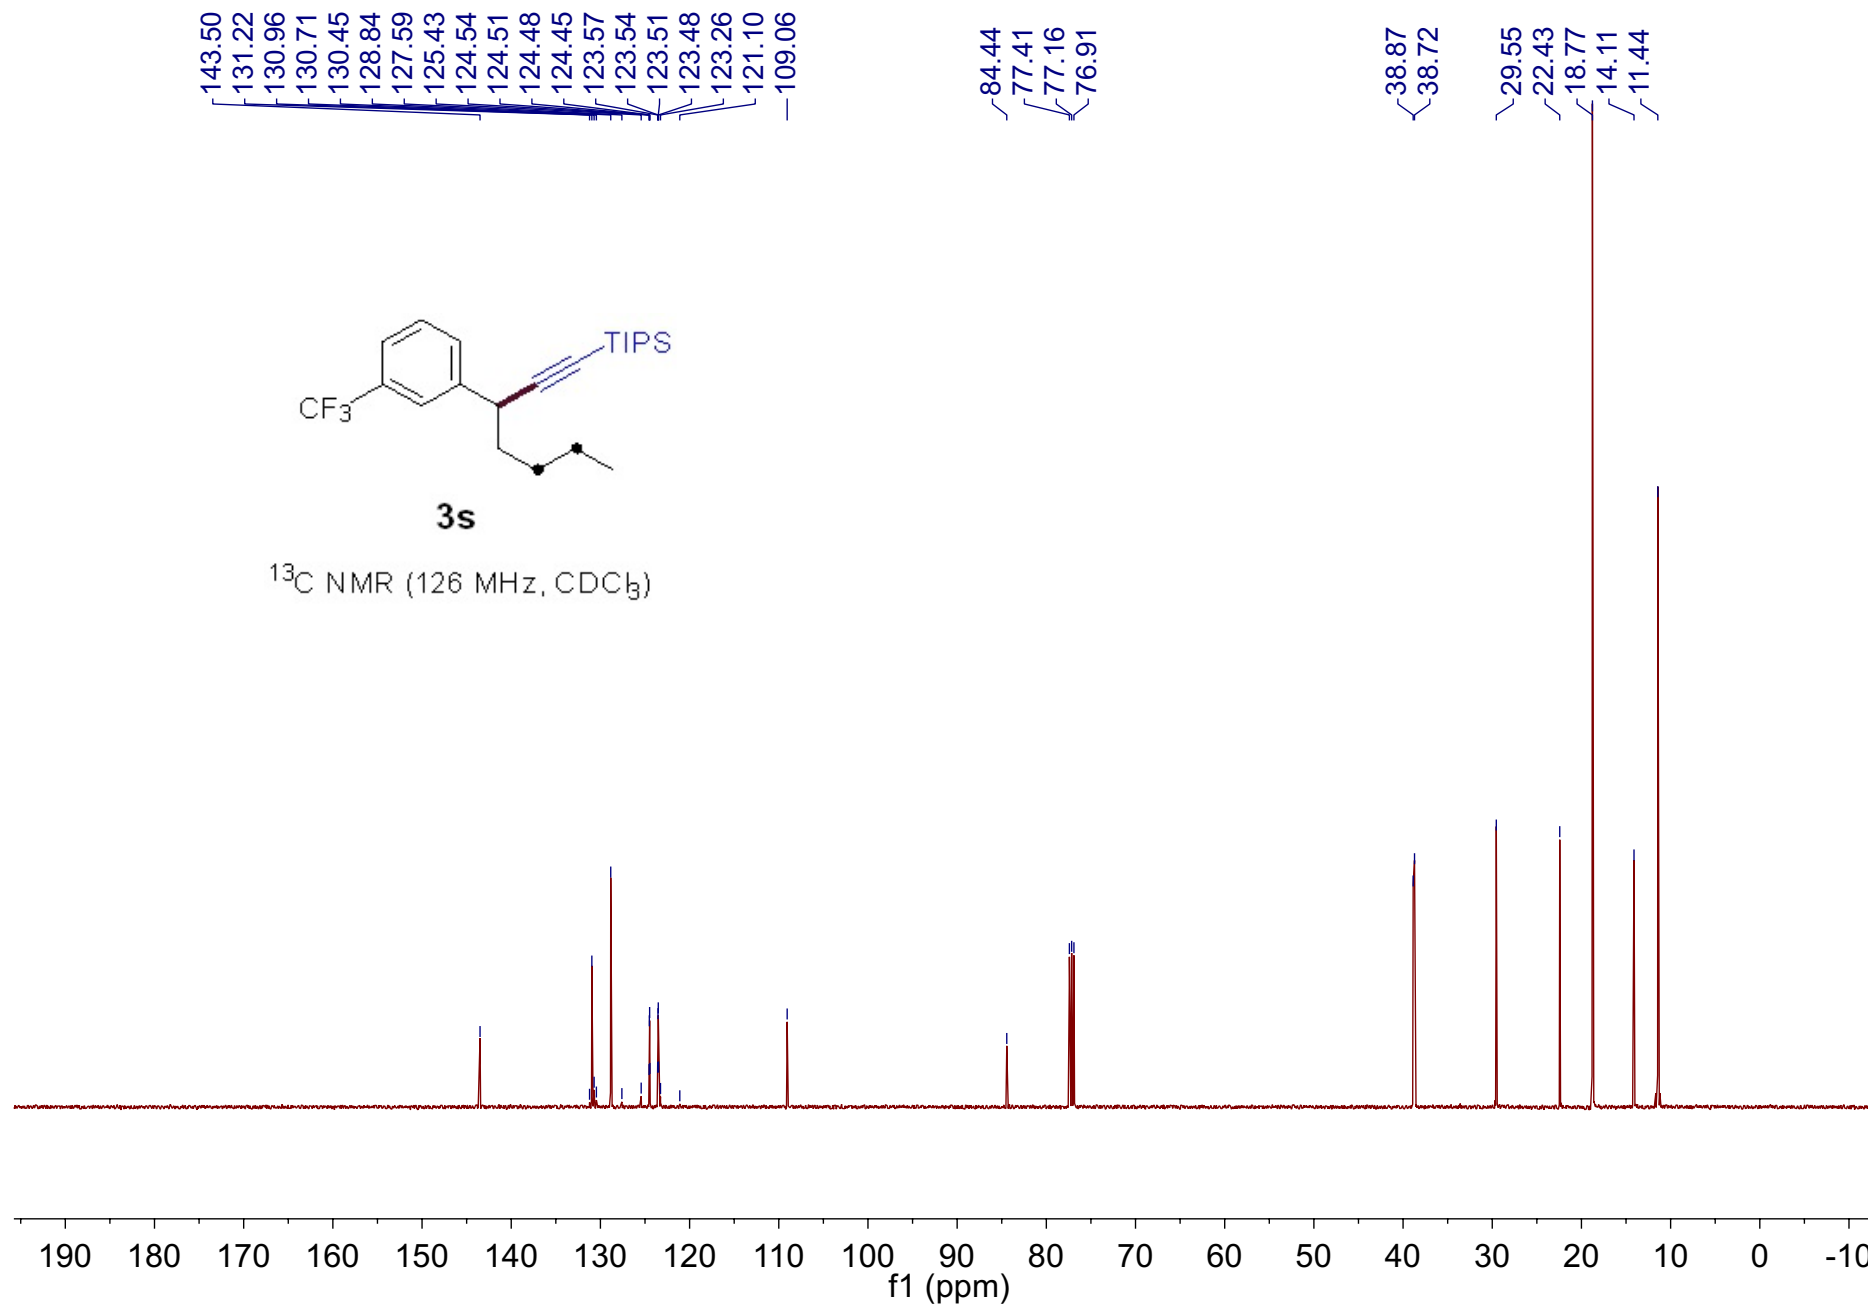

**Supplementary Fig. 68.**  $^{13}\text{C}$  NMR (126 MHz,  $\text{CDCl}_3$ ) spectra for compound **3s**



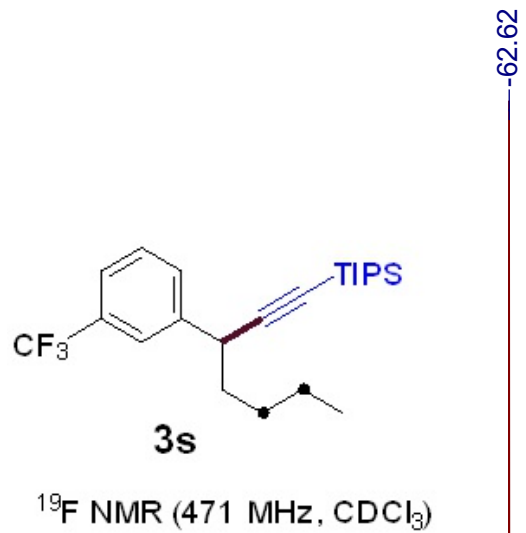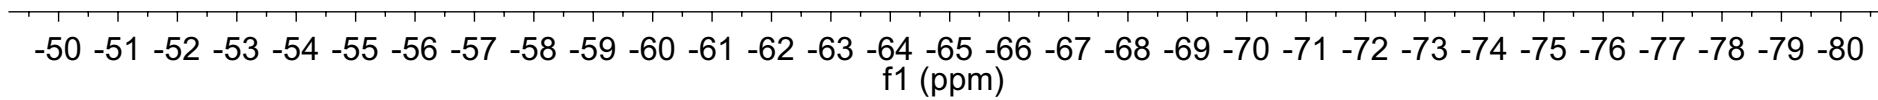

**Supplementary Fig. 69.**  $^{19}\text{F}$  NMR (471 MHz,  $\text{CDCl}_3$ ) spectra for compound **3s**

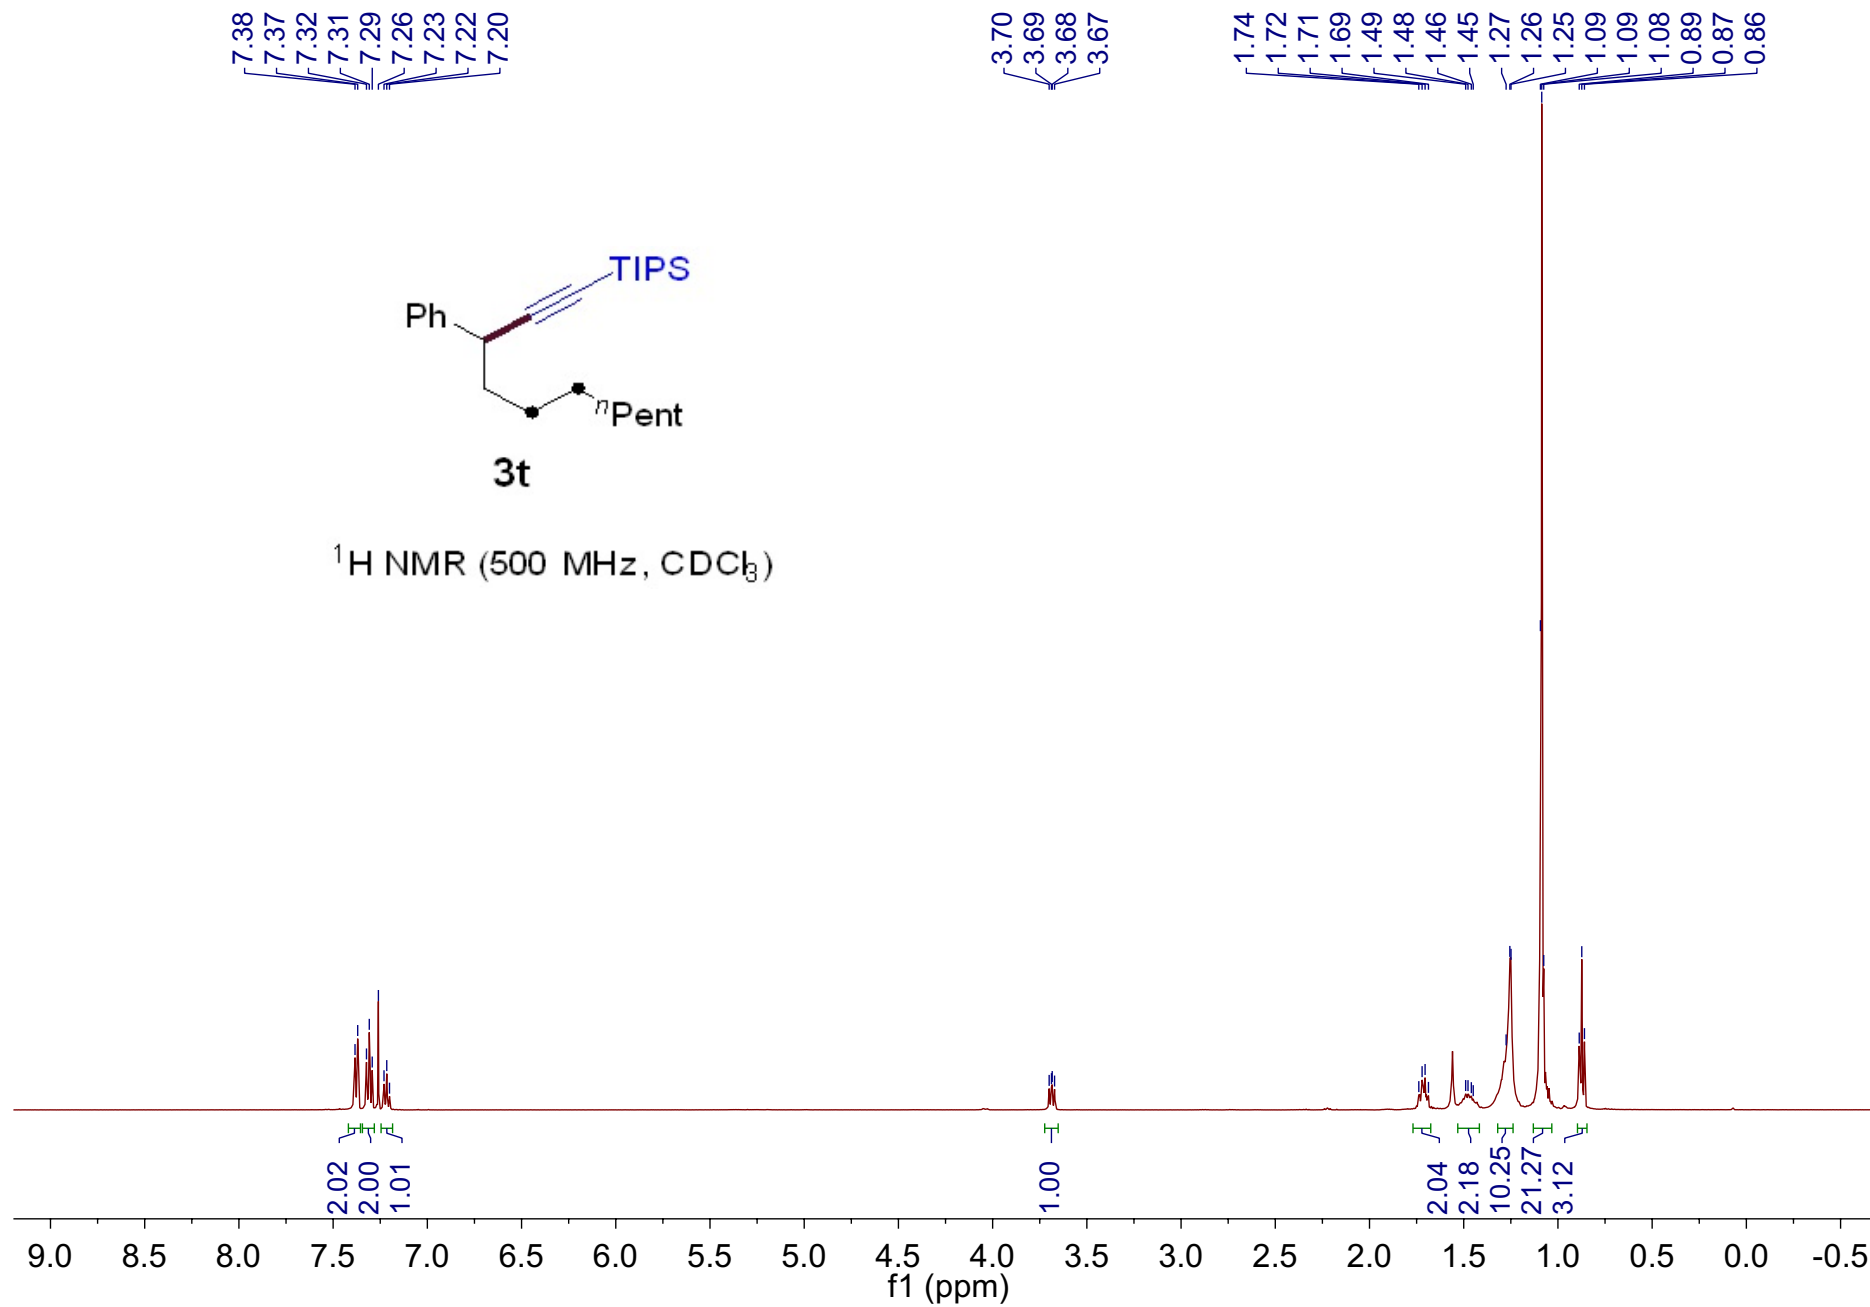

Supplementary Fig. 70.  $^1\text{H NMR}$  (500 MHz,  $\text{CDCl}_3$ ) spectra for compound **3t**

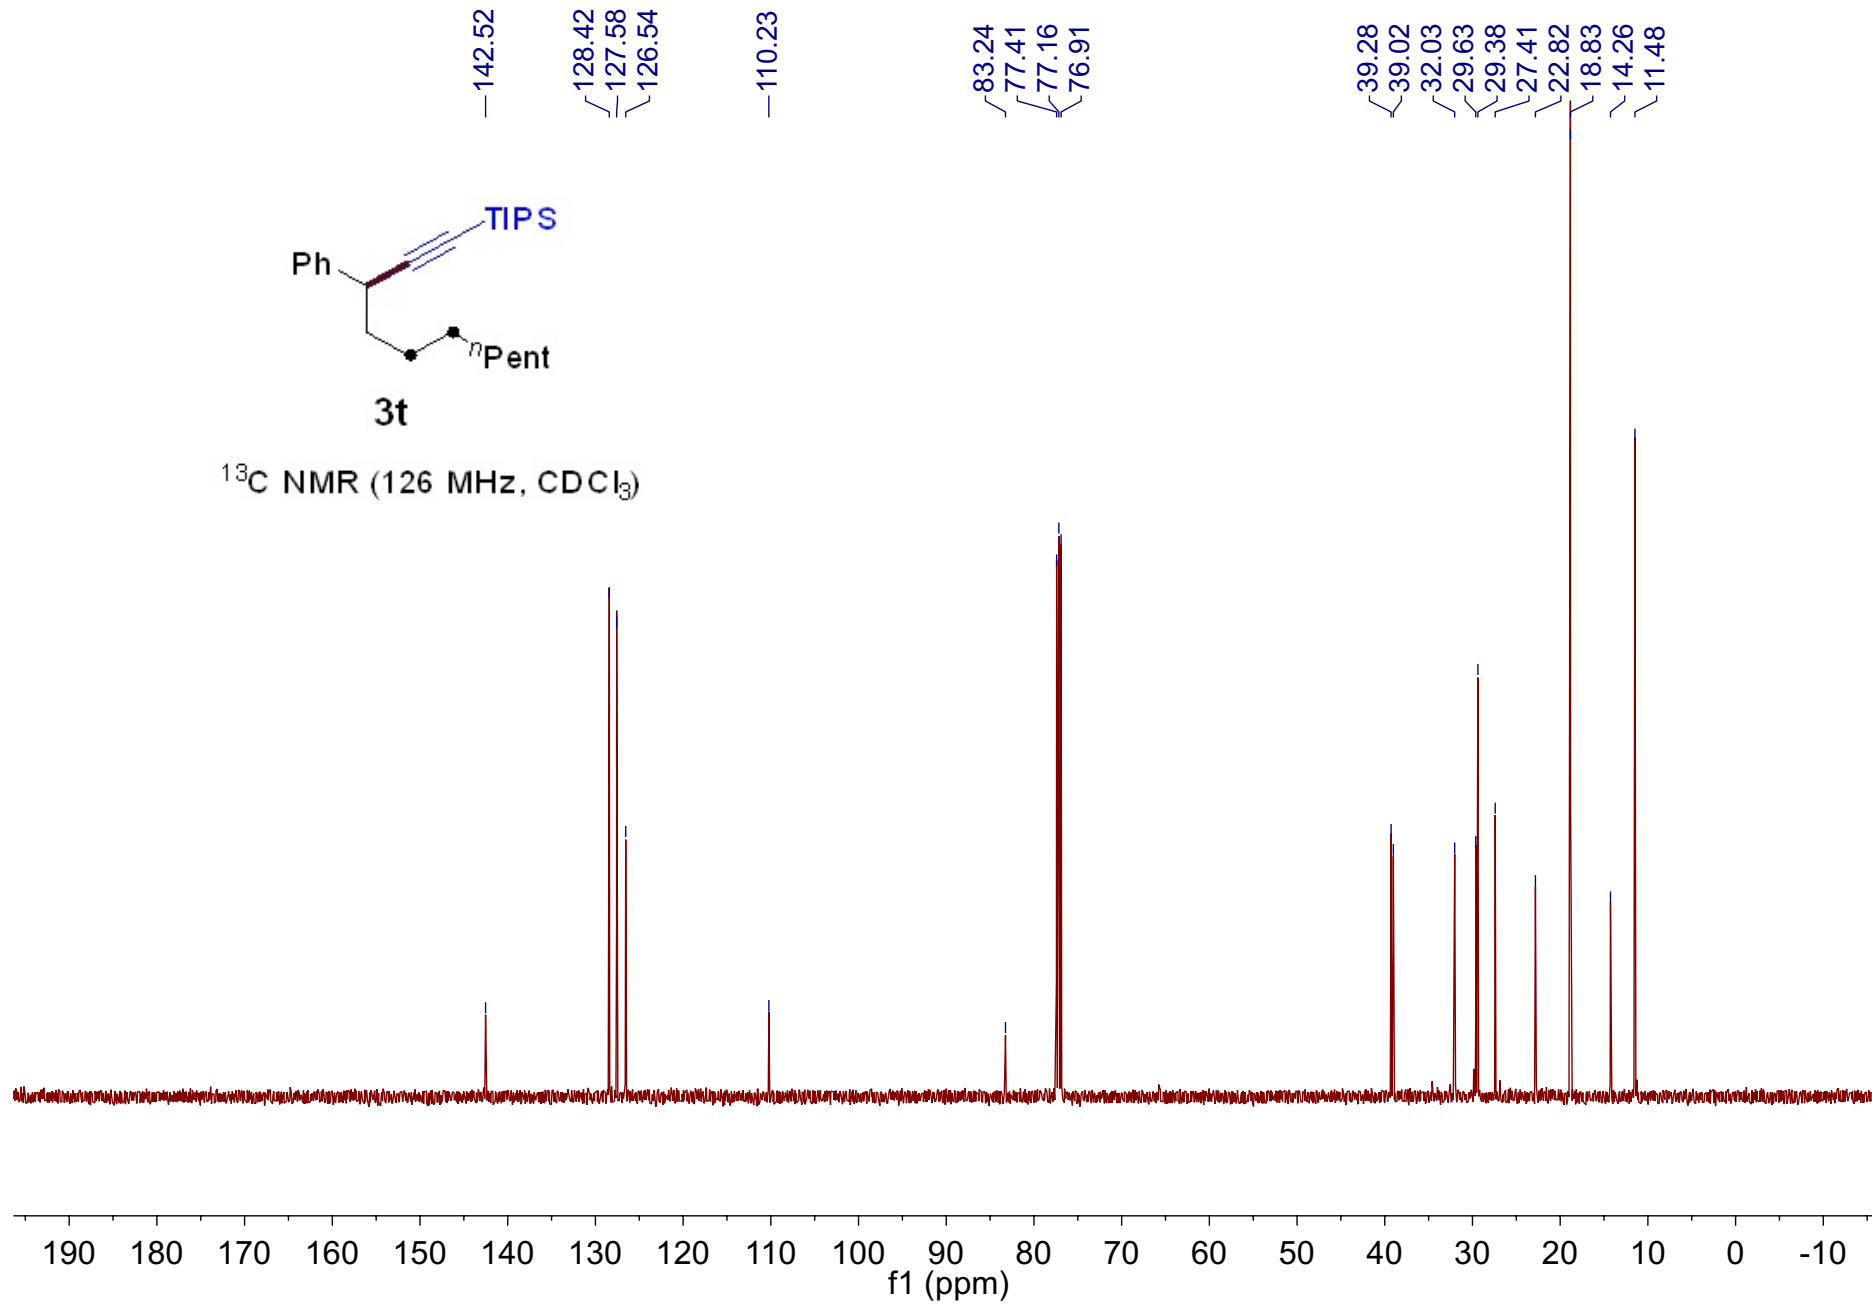

**Supplementary Fig. 71.** <sup>13</sup>C NMR (126 MHz, CDCl<sub>3</sub>) spectra for compound **3t**

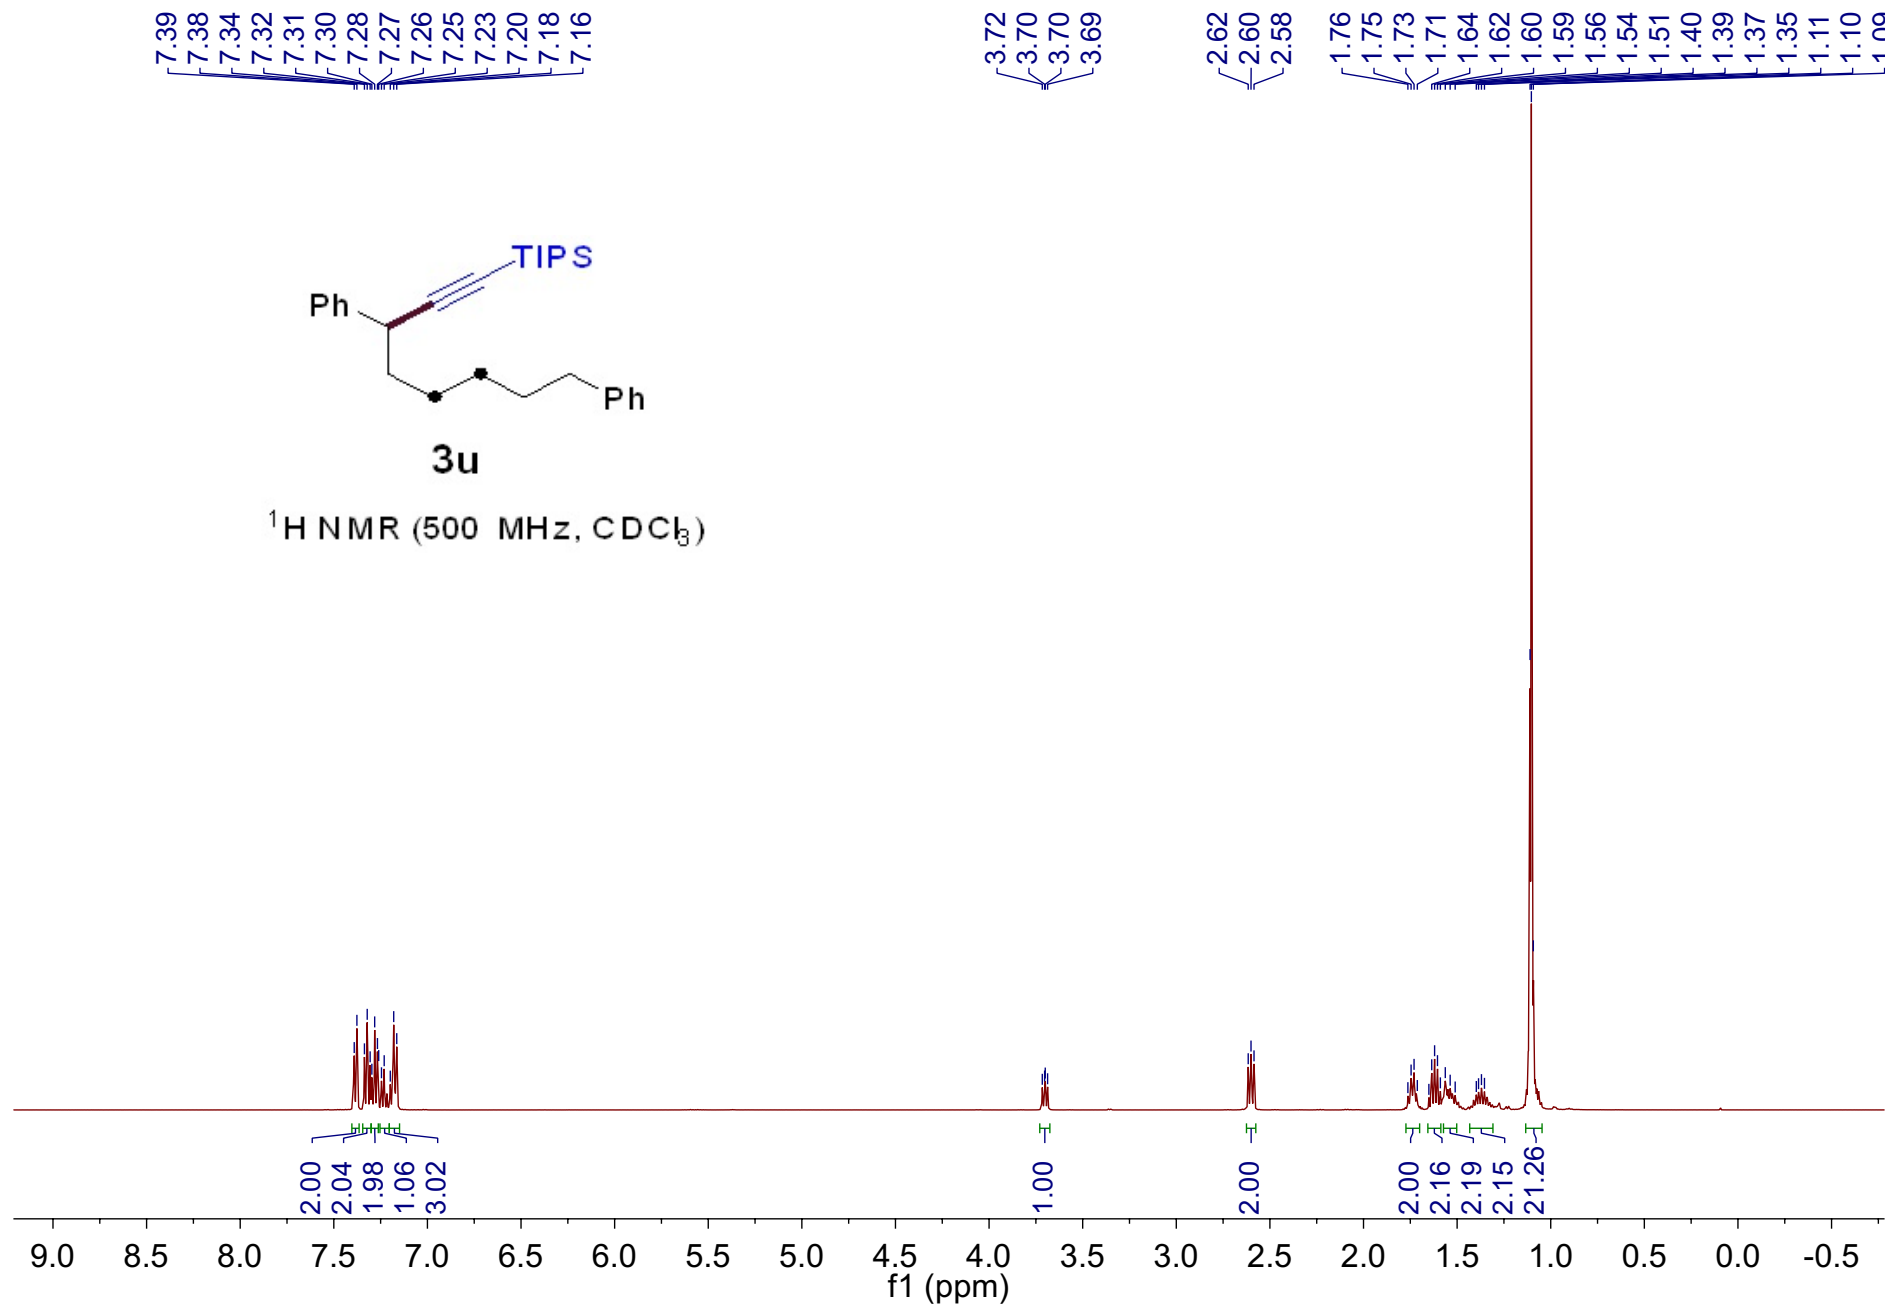

Supplementary Fig. 72.  $^1\text{H NMR}$  (500 MHz,  $\text{CDCl}_3$ ) spectra for compound **3u**

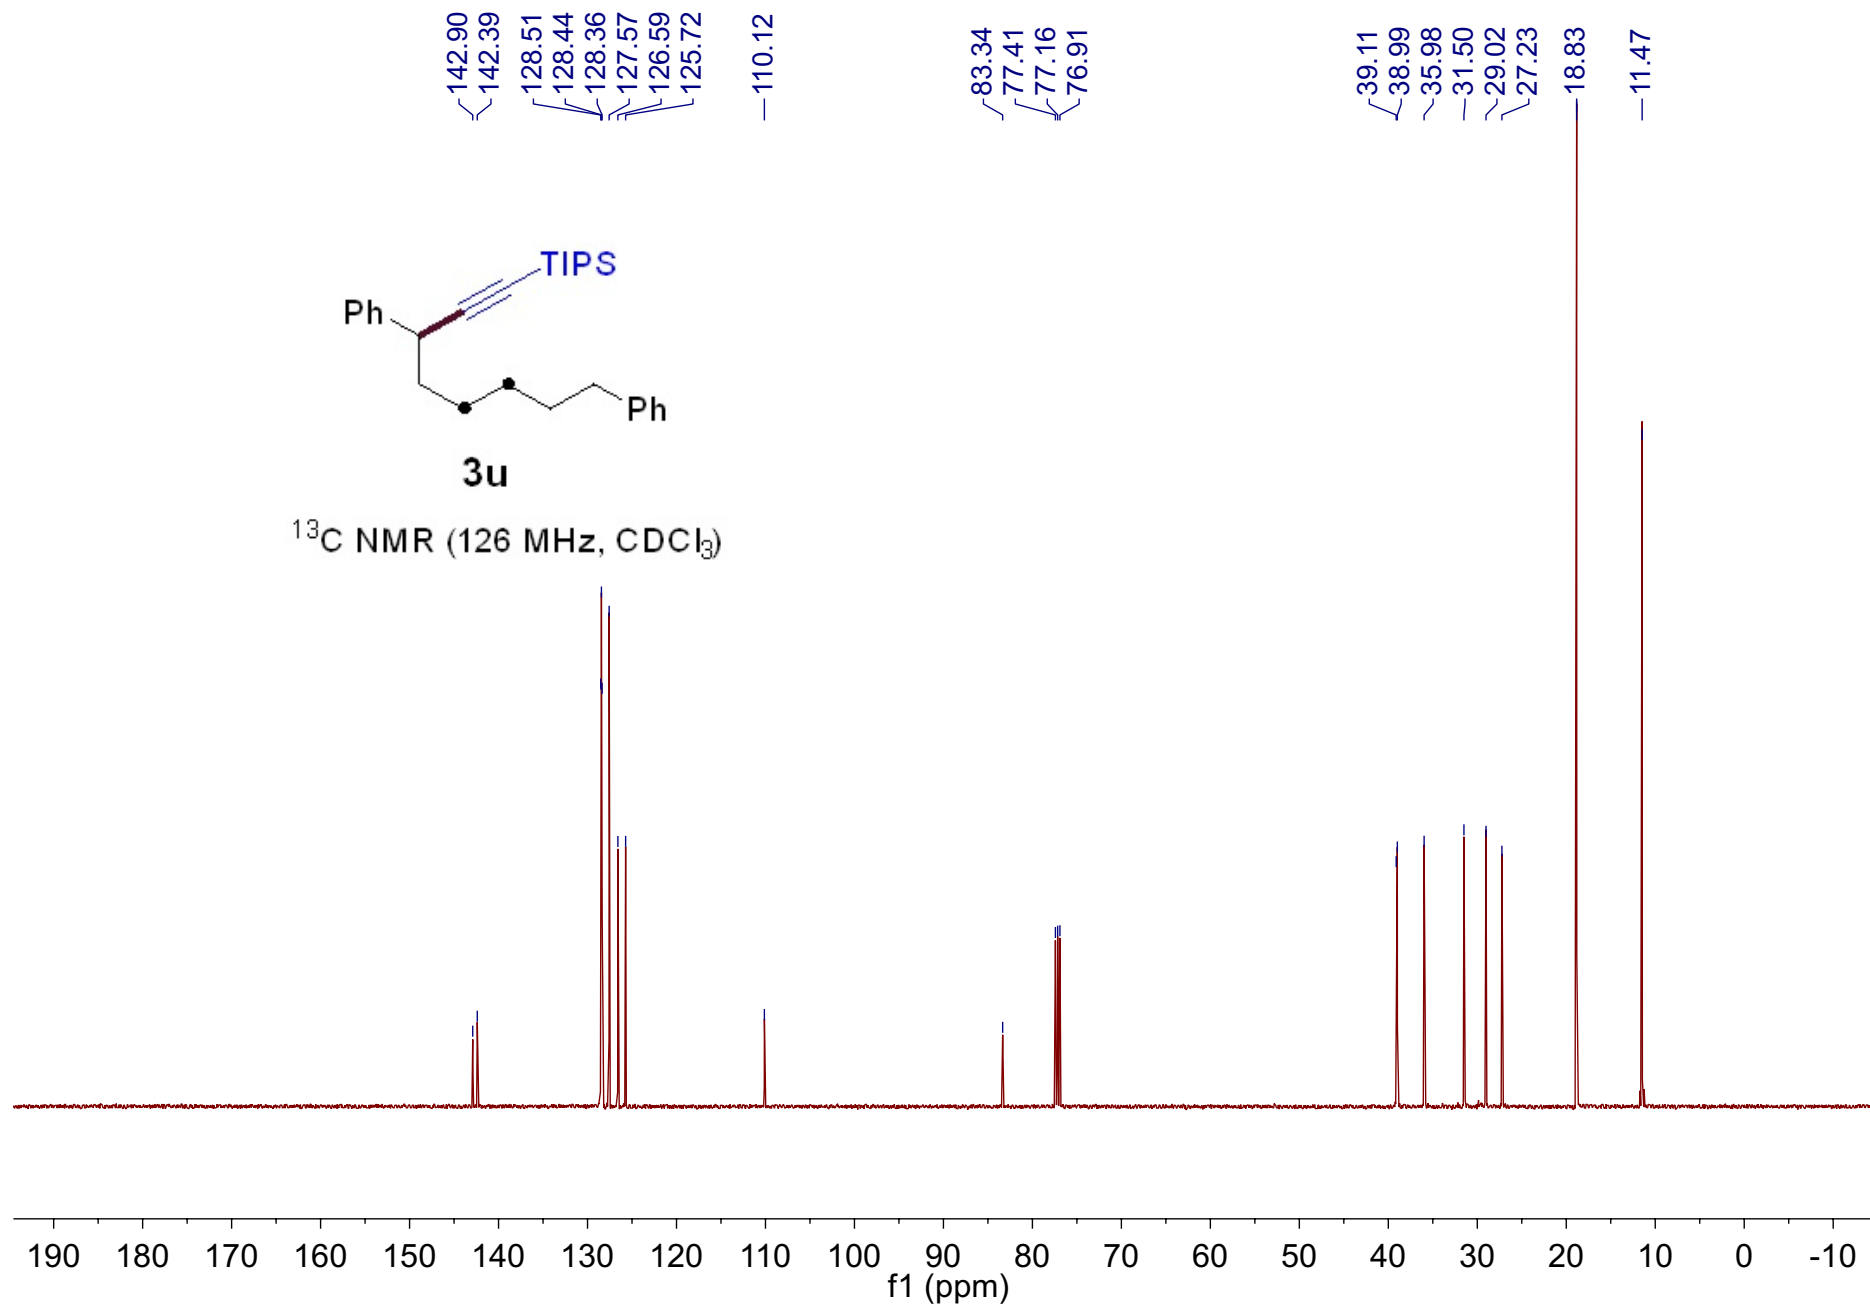

**Supplementary Fig. 73.**  $^{13}\text{C}$  NMR (126 MHz,  $\text{CDCl}_3$ ) spectra for compound **3u**

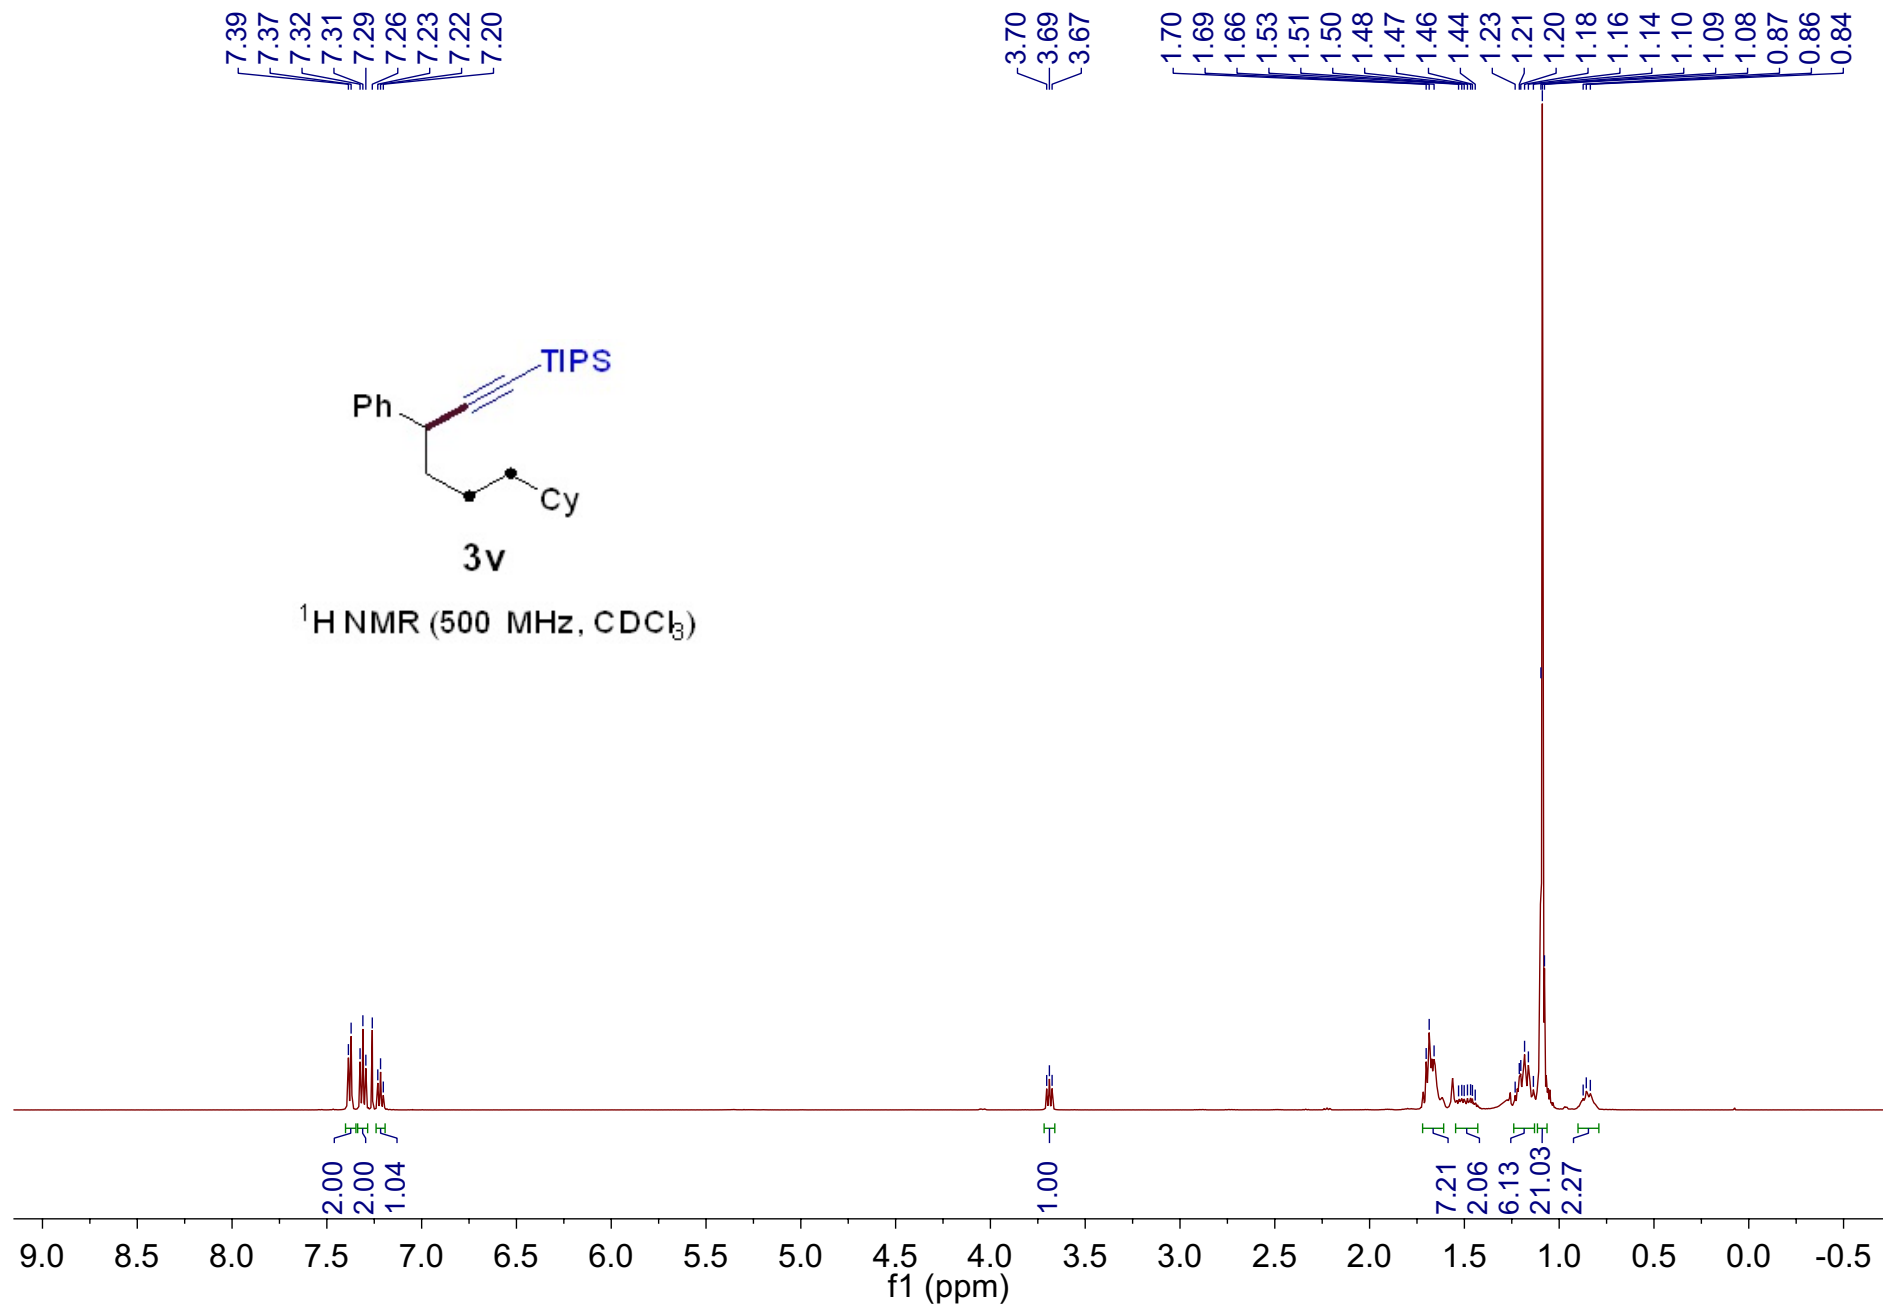

Supplementary Fig. 74.  $^1\text{H NMR}$  (500 MHz,  $\text{CDCl}_3$ ) spectra for compound **3v**

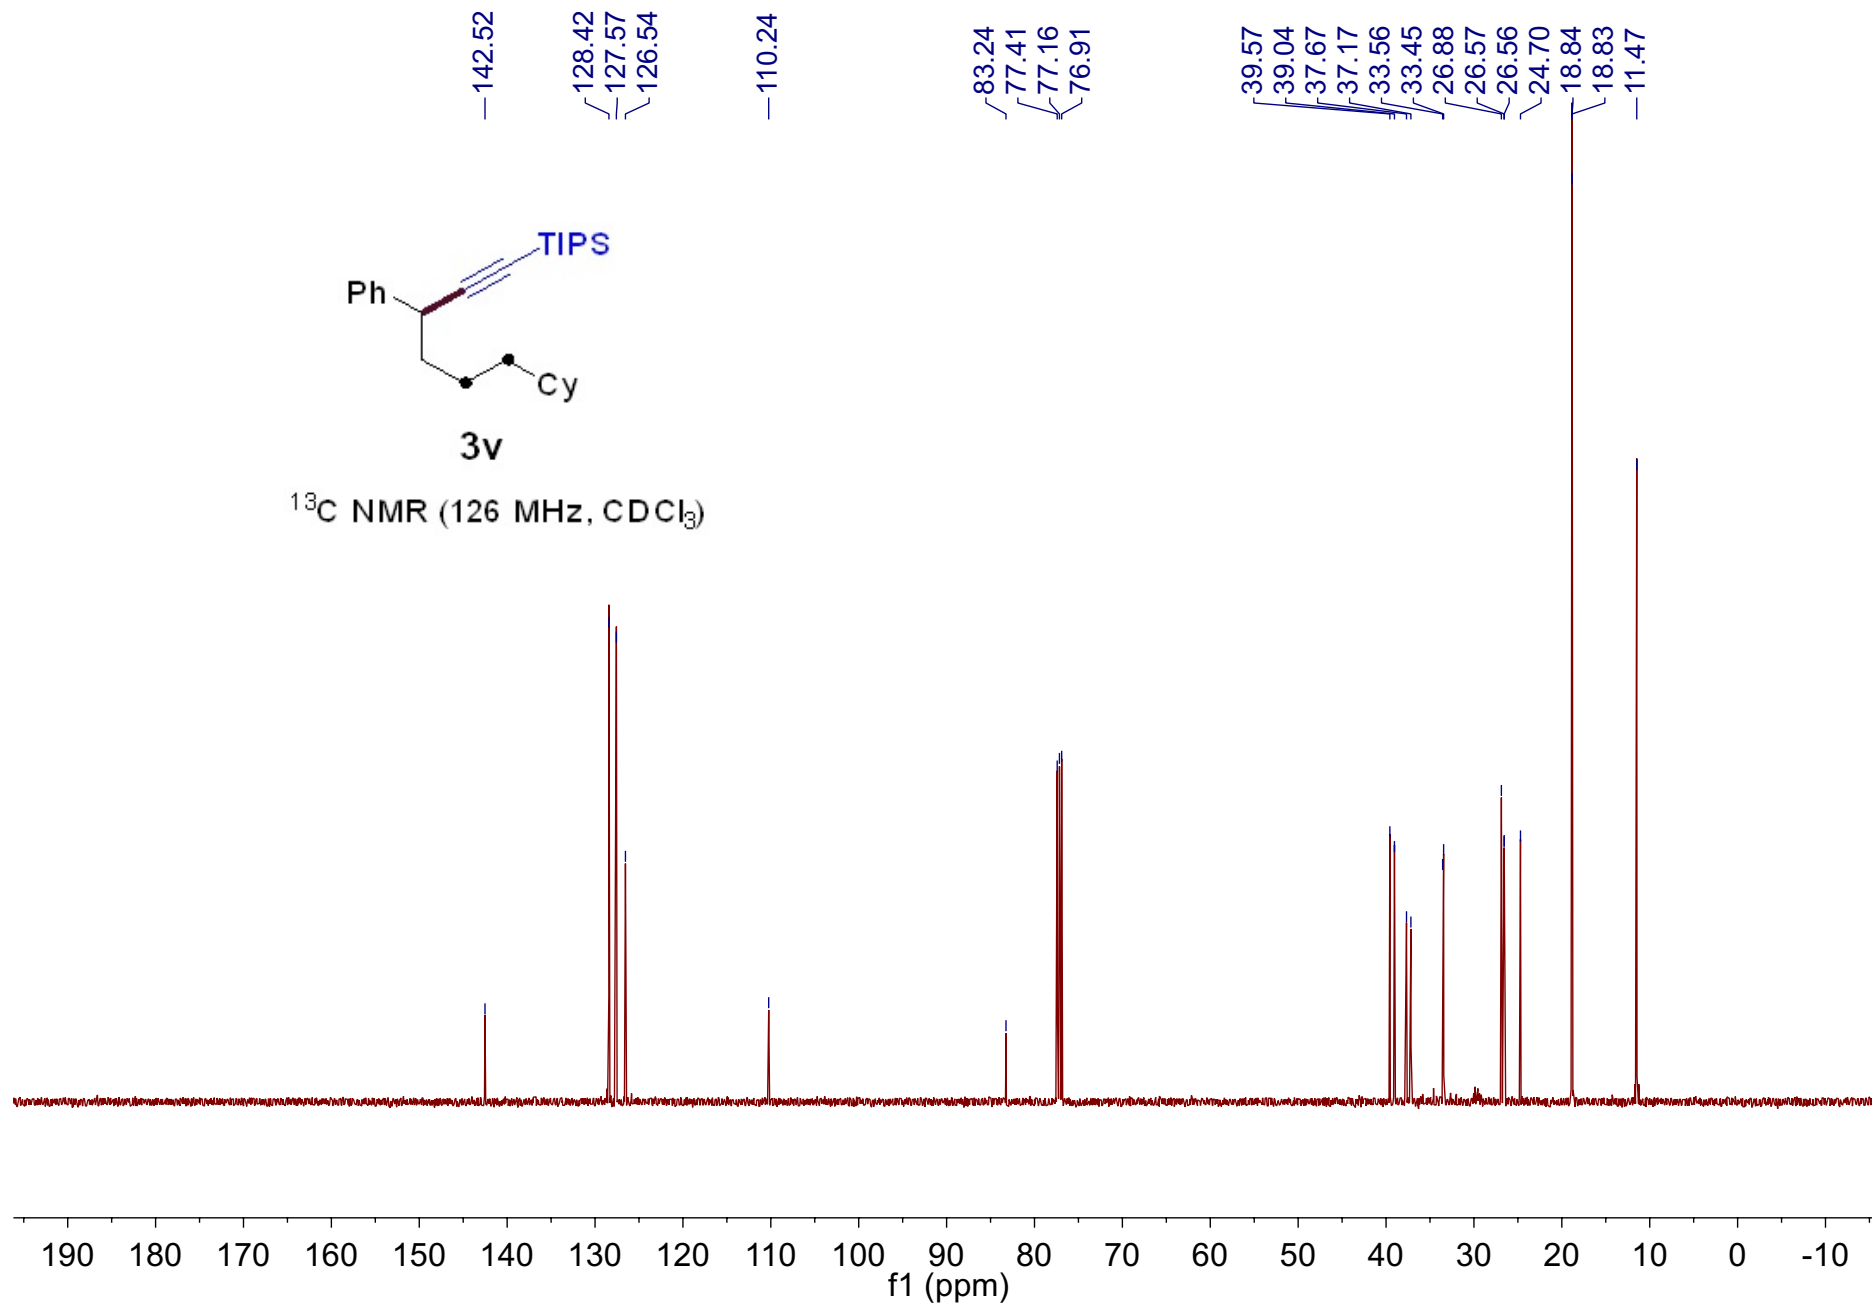

**Supplementary Fig. 75.** <sup>13</sup>C NMR (126 MHz, CDCl<sub>3</sub>) spectra for compound **3v**

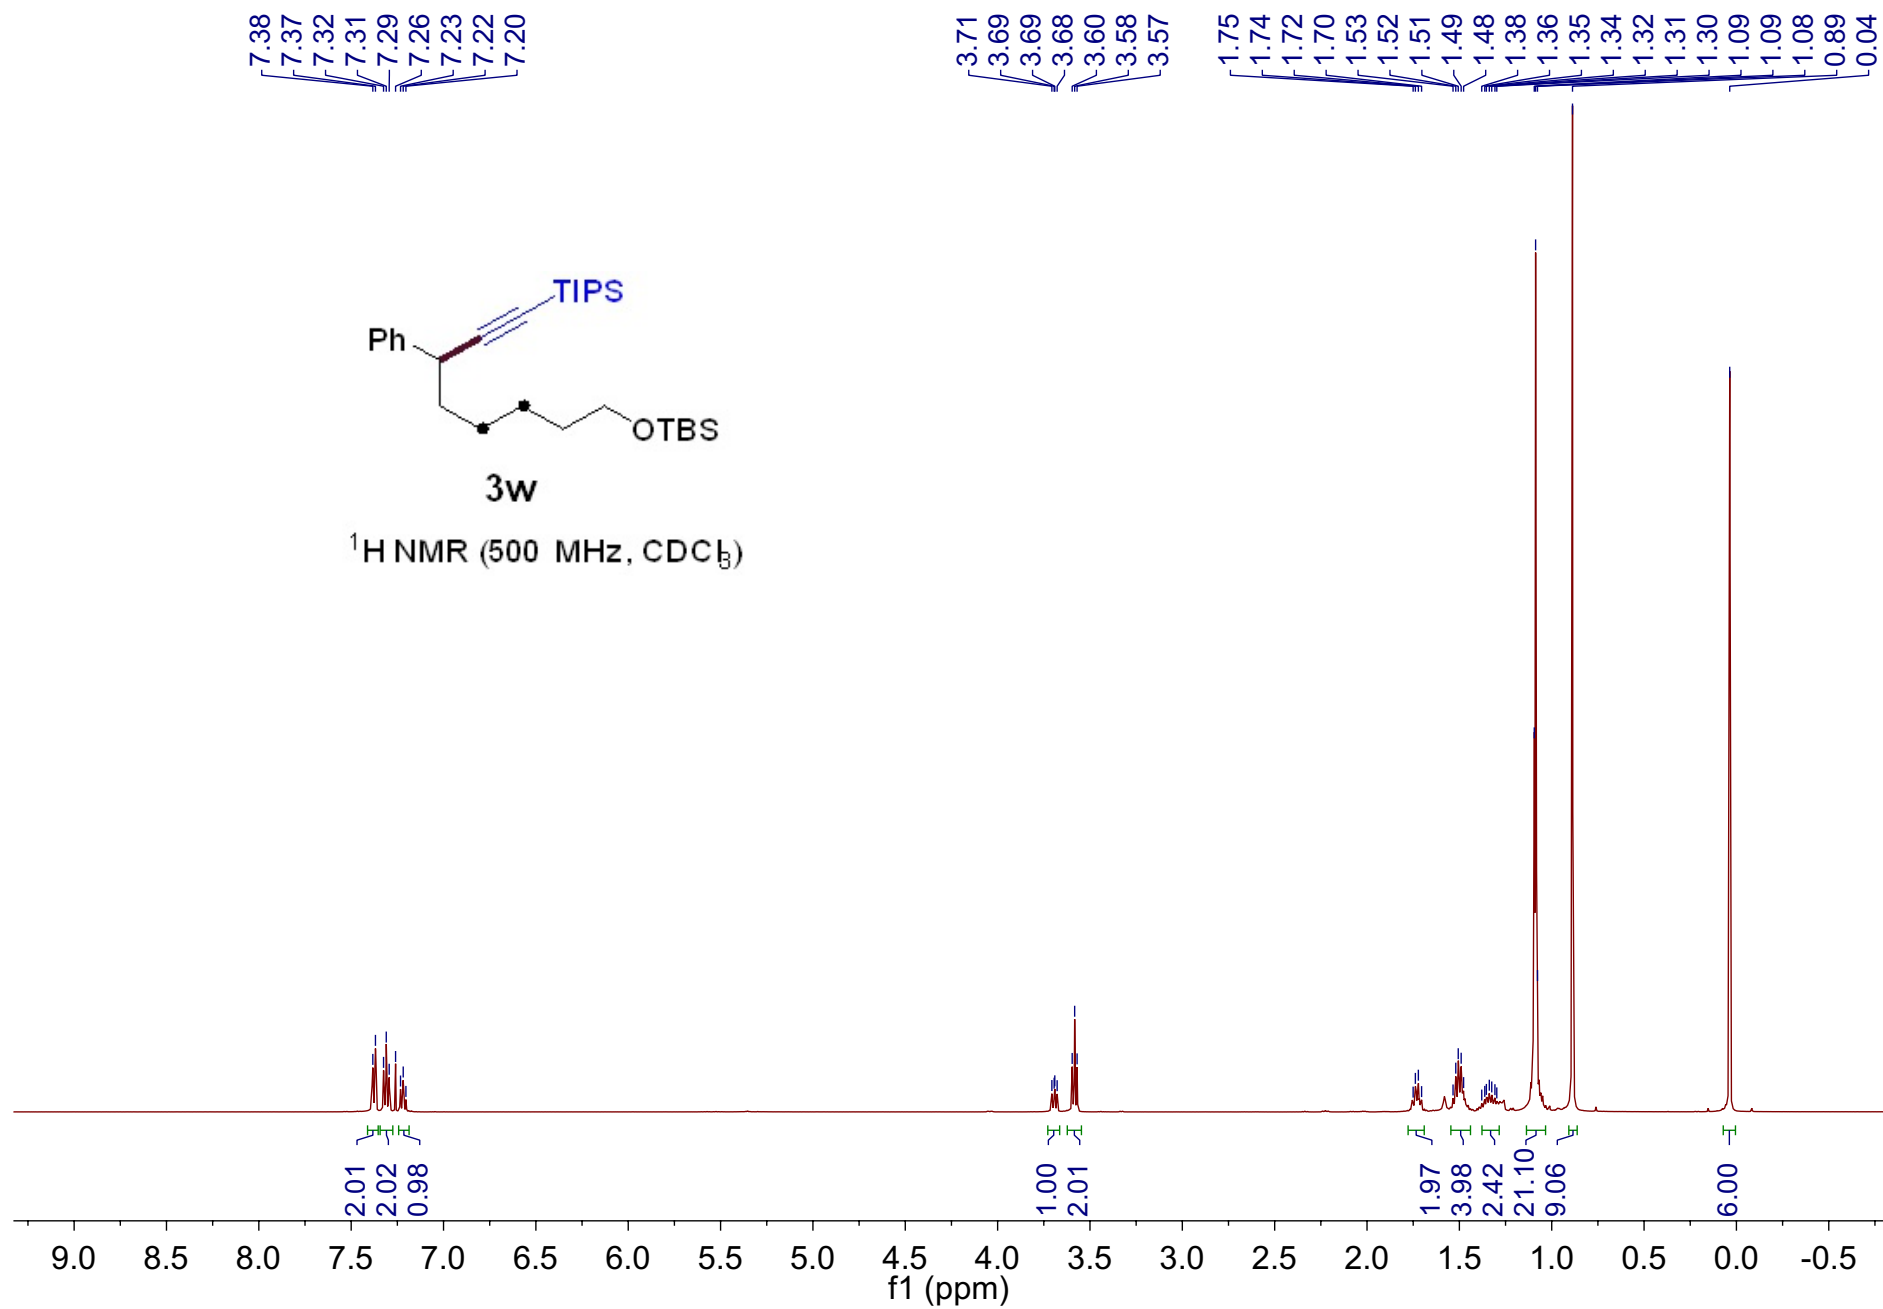

Supplementary Fig. 76.  $^1\text{H NMR}$  (500 MHz,  $\text{CDCl}_3$ ) spectra for compound **3w**



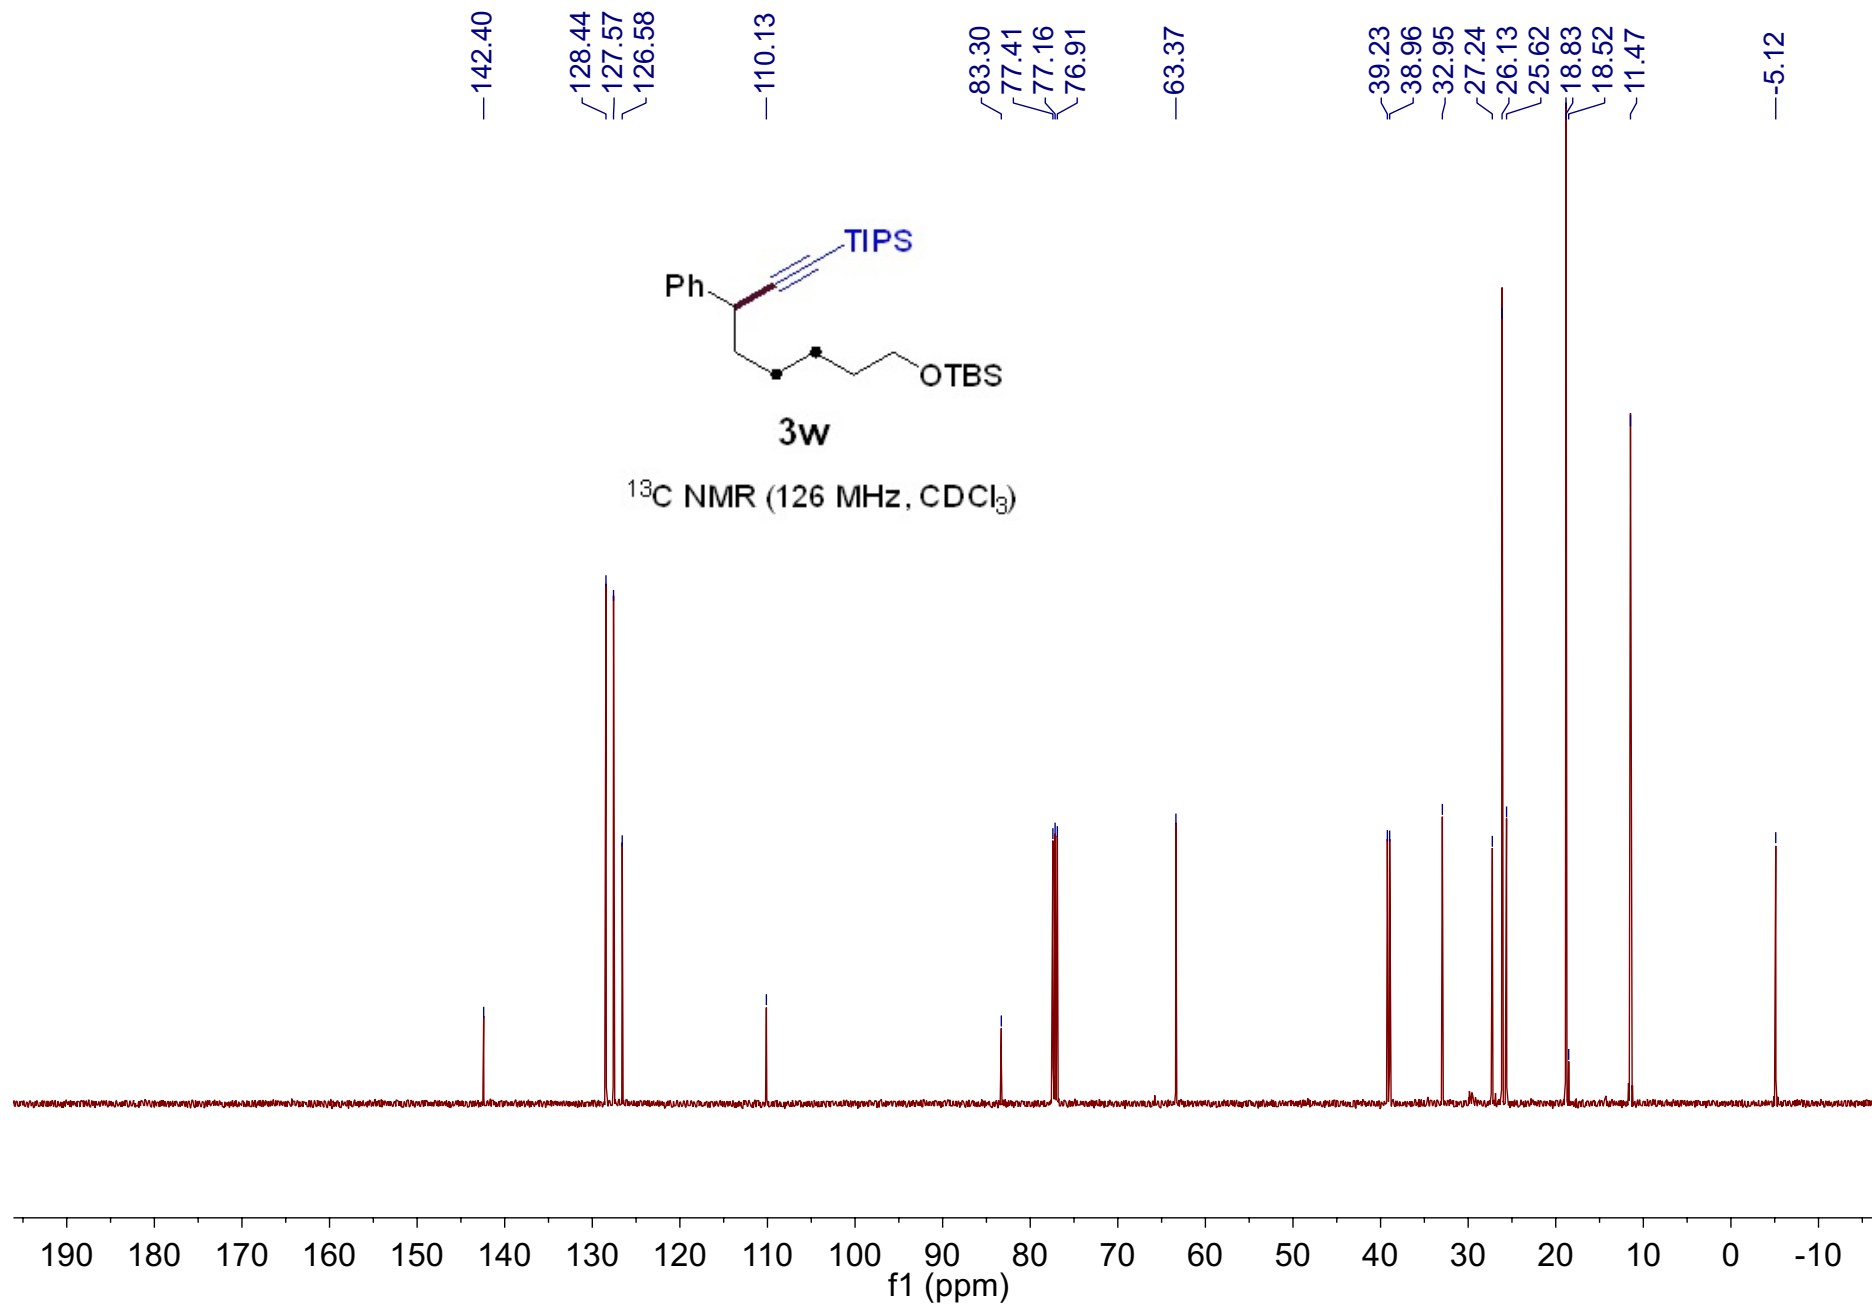

Supplementary Fig. 77.  $^{13}\text{C}$  NMR (126 MHz,  $\text{CDCl}_3$ ) spectra for compound **3w**

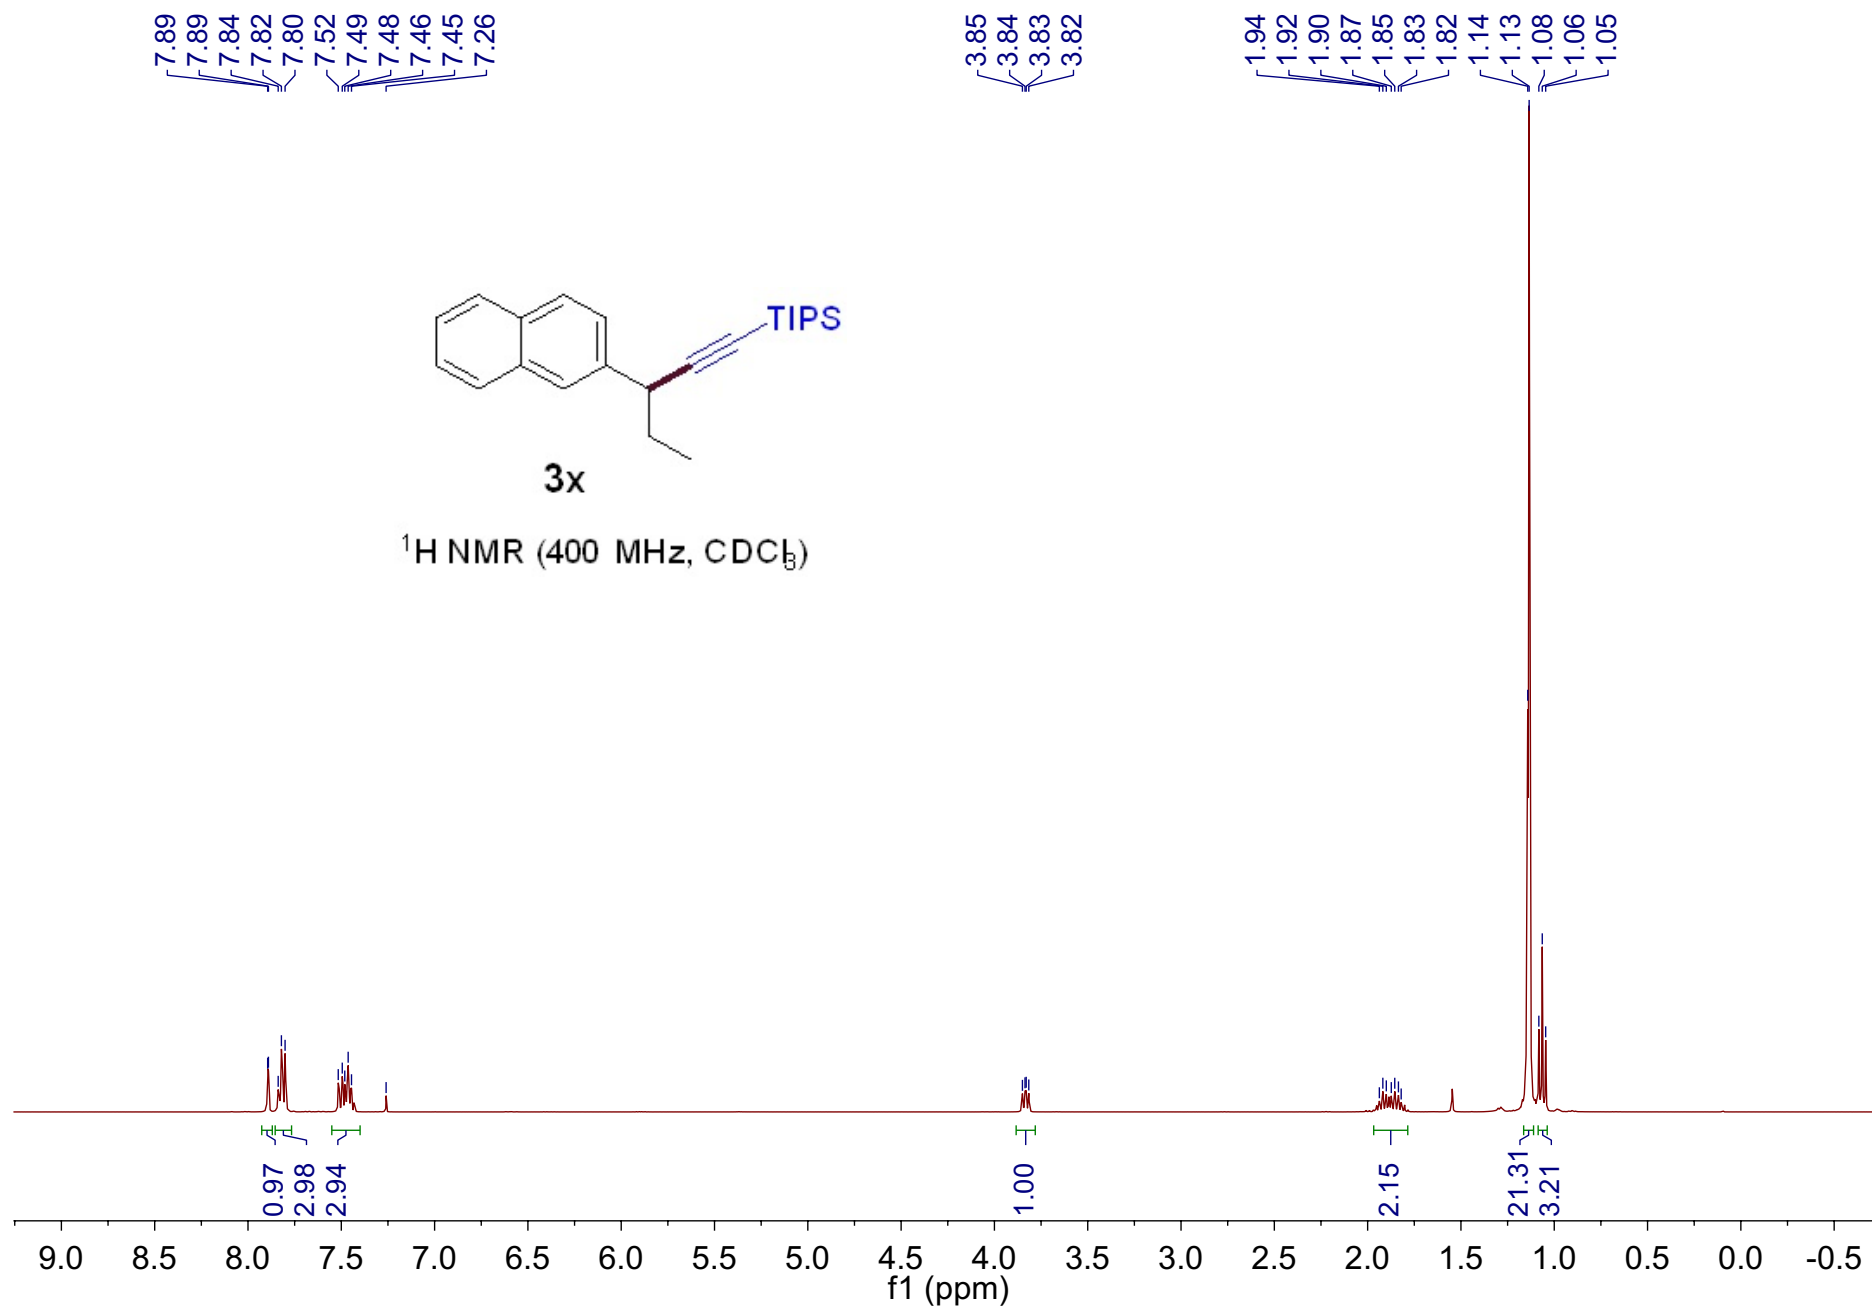

Supplementary Fig. 78.  $^1\text{H NMR}$  (400 MHz,  $\text{CDCl}_3$ ) spectra for compound **3x**

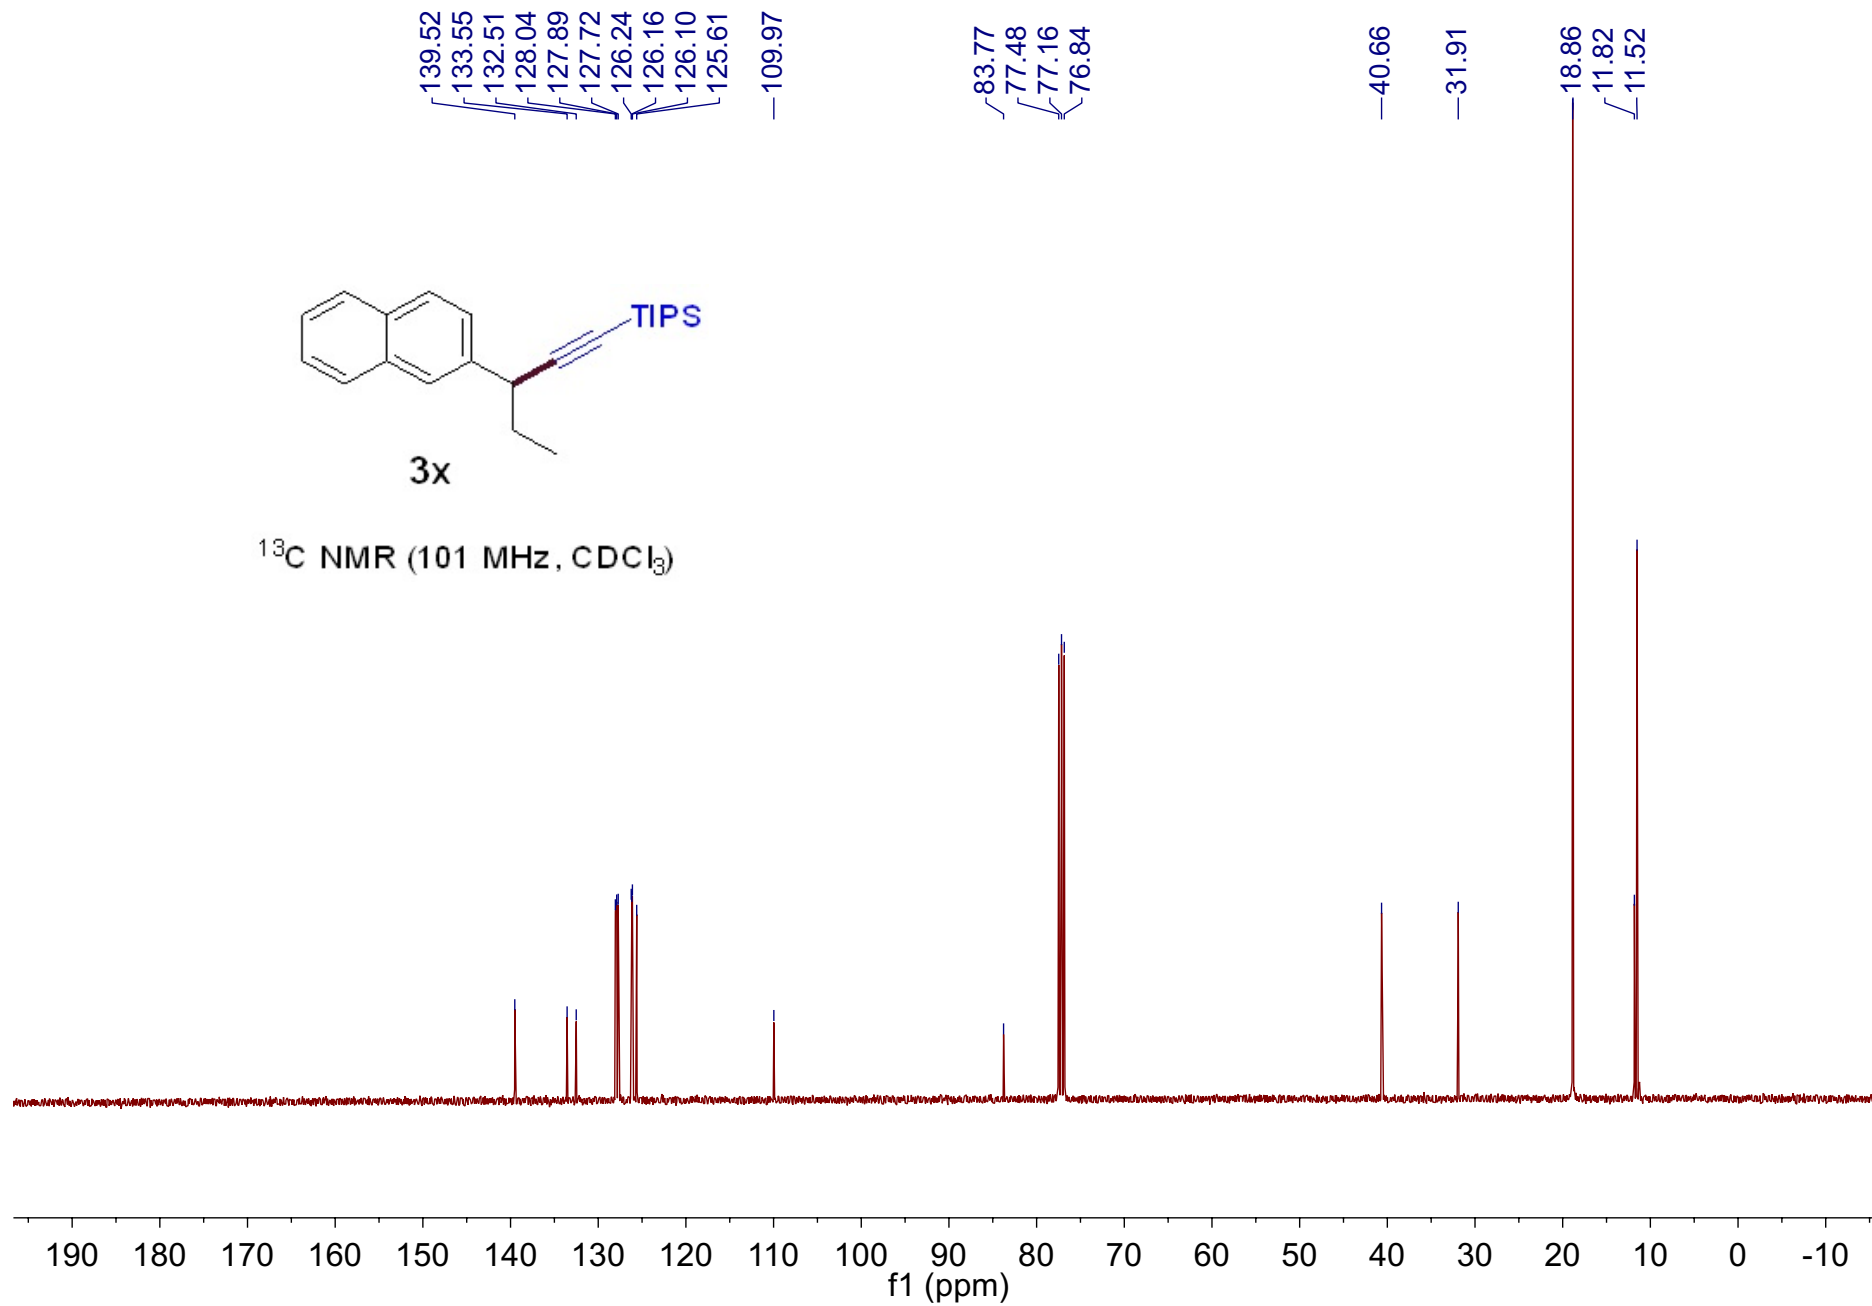

Supplementary Fig. 79.  $^{13}\text{C}$  NMR (101 MHz,  $\text{CDCl}_3$ ) spectra for compound **3x**

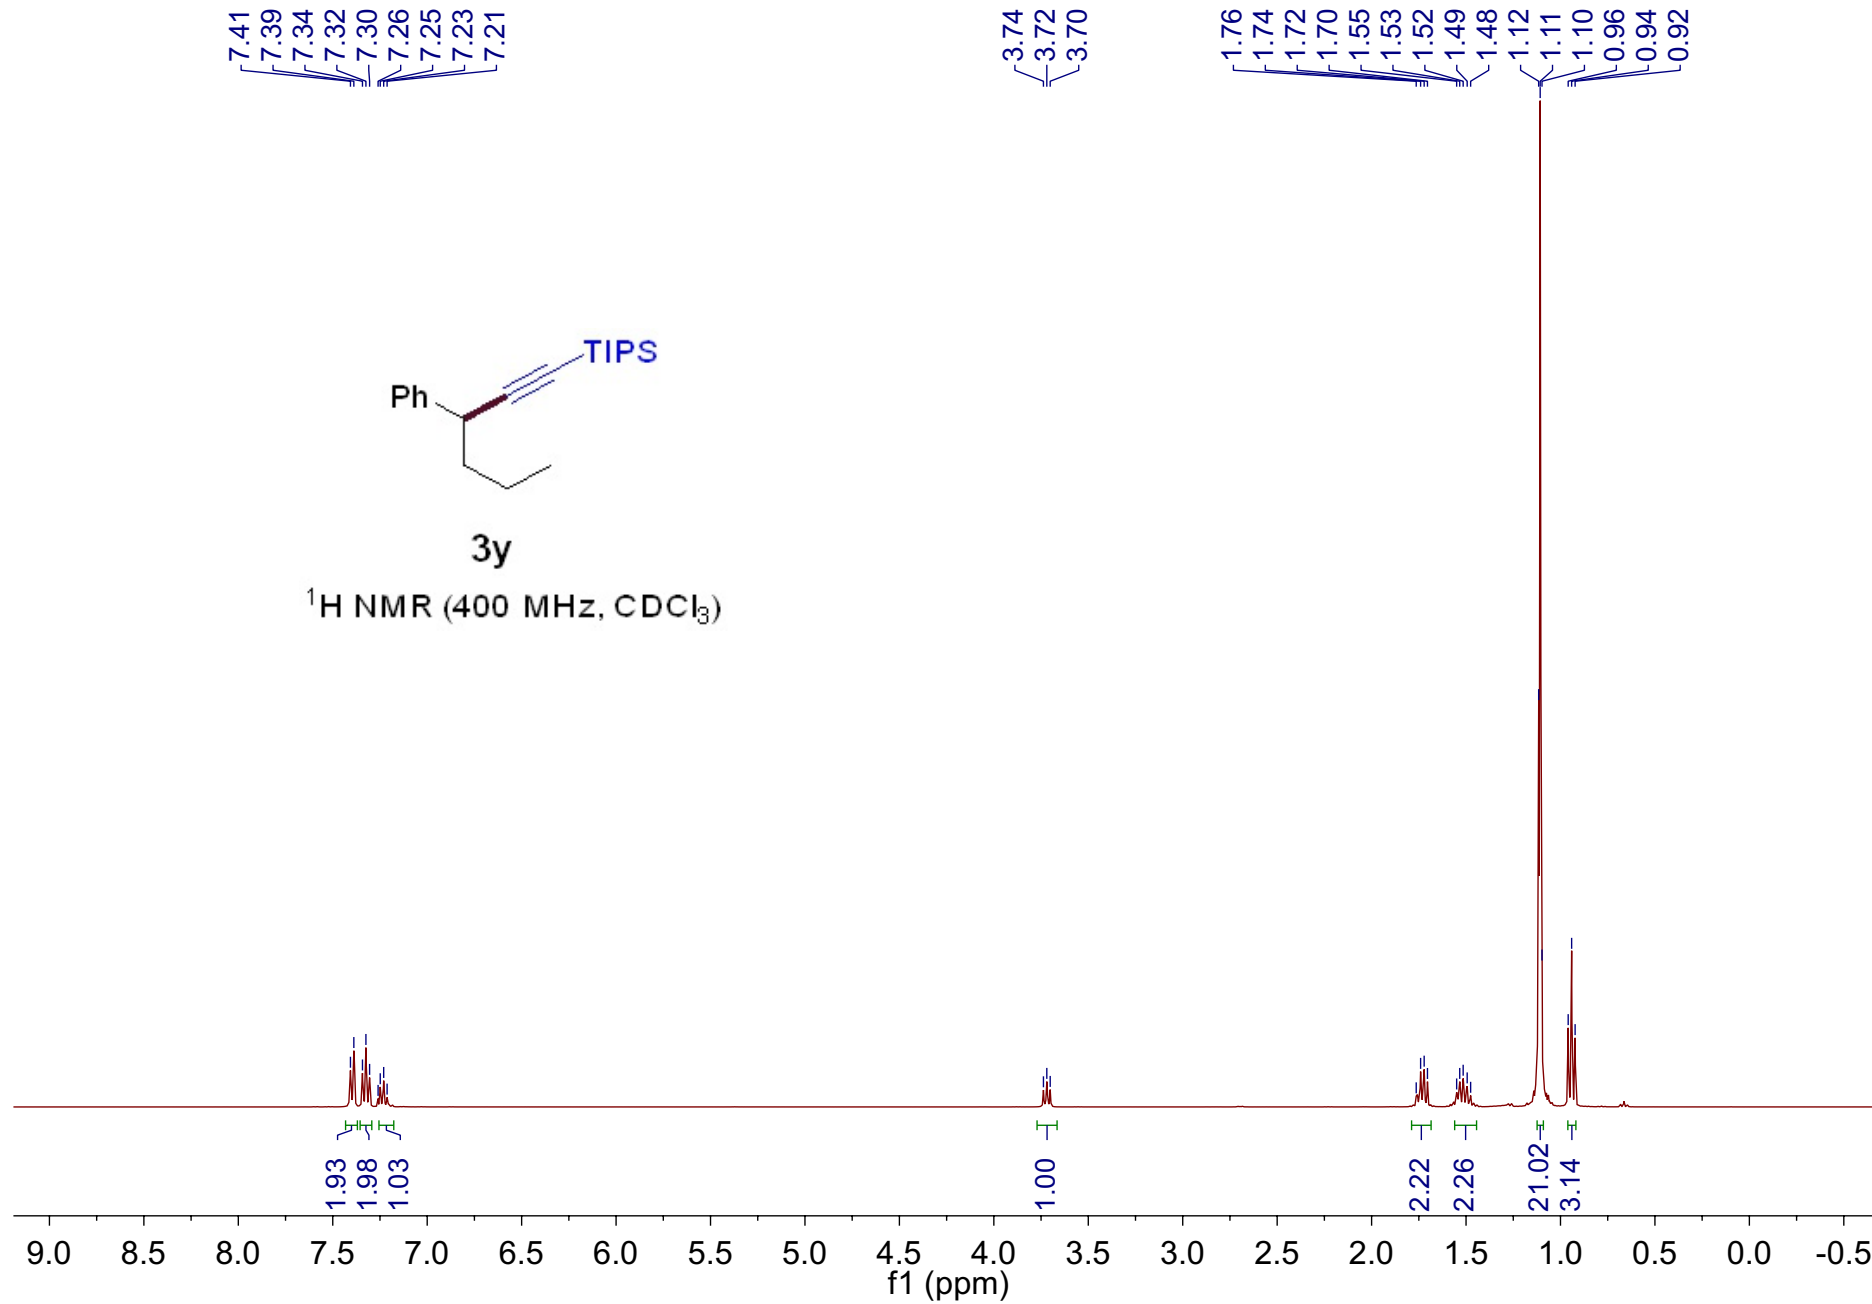

Supplementary Fig. 80. <sup>1</sup>H NMR (400 MHz, CDCl<sub>3</sub>) spectra for compound **3y**

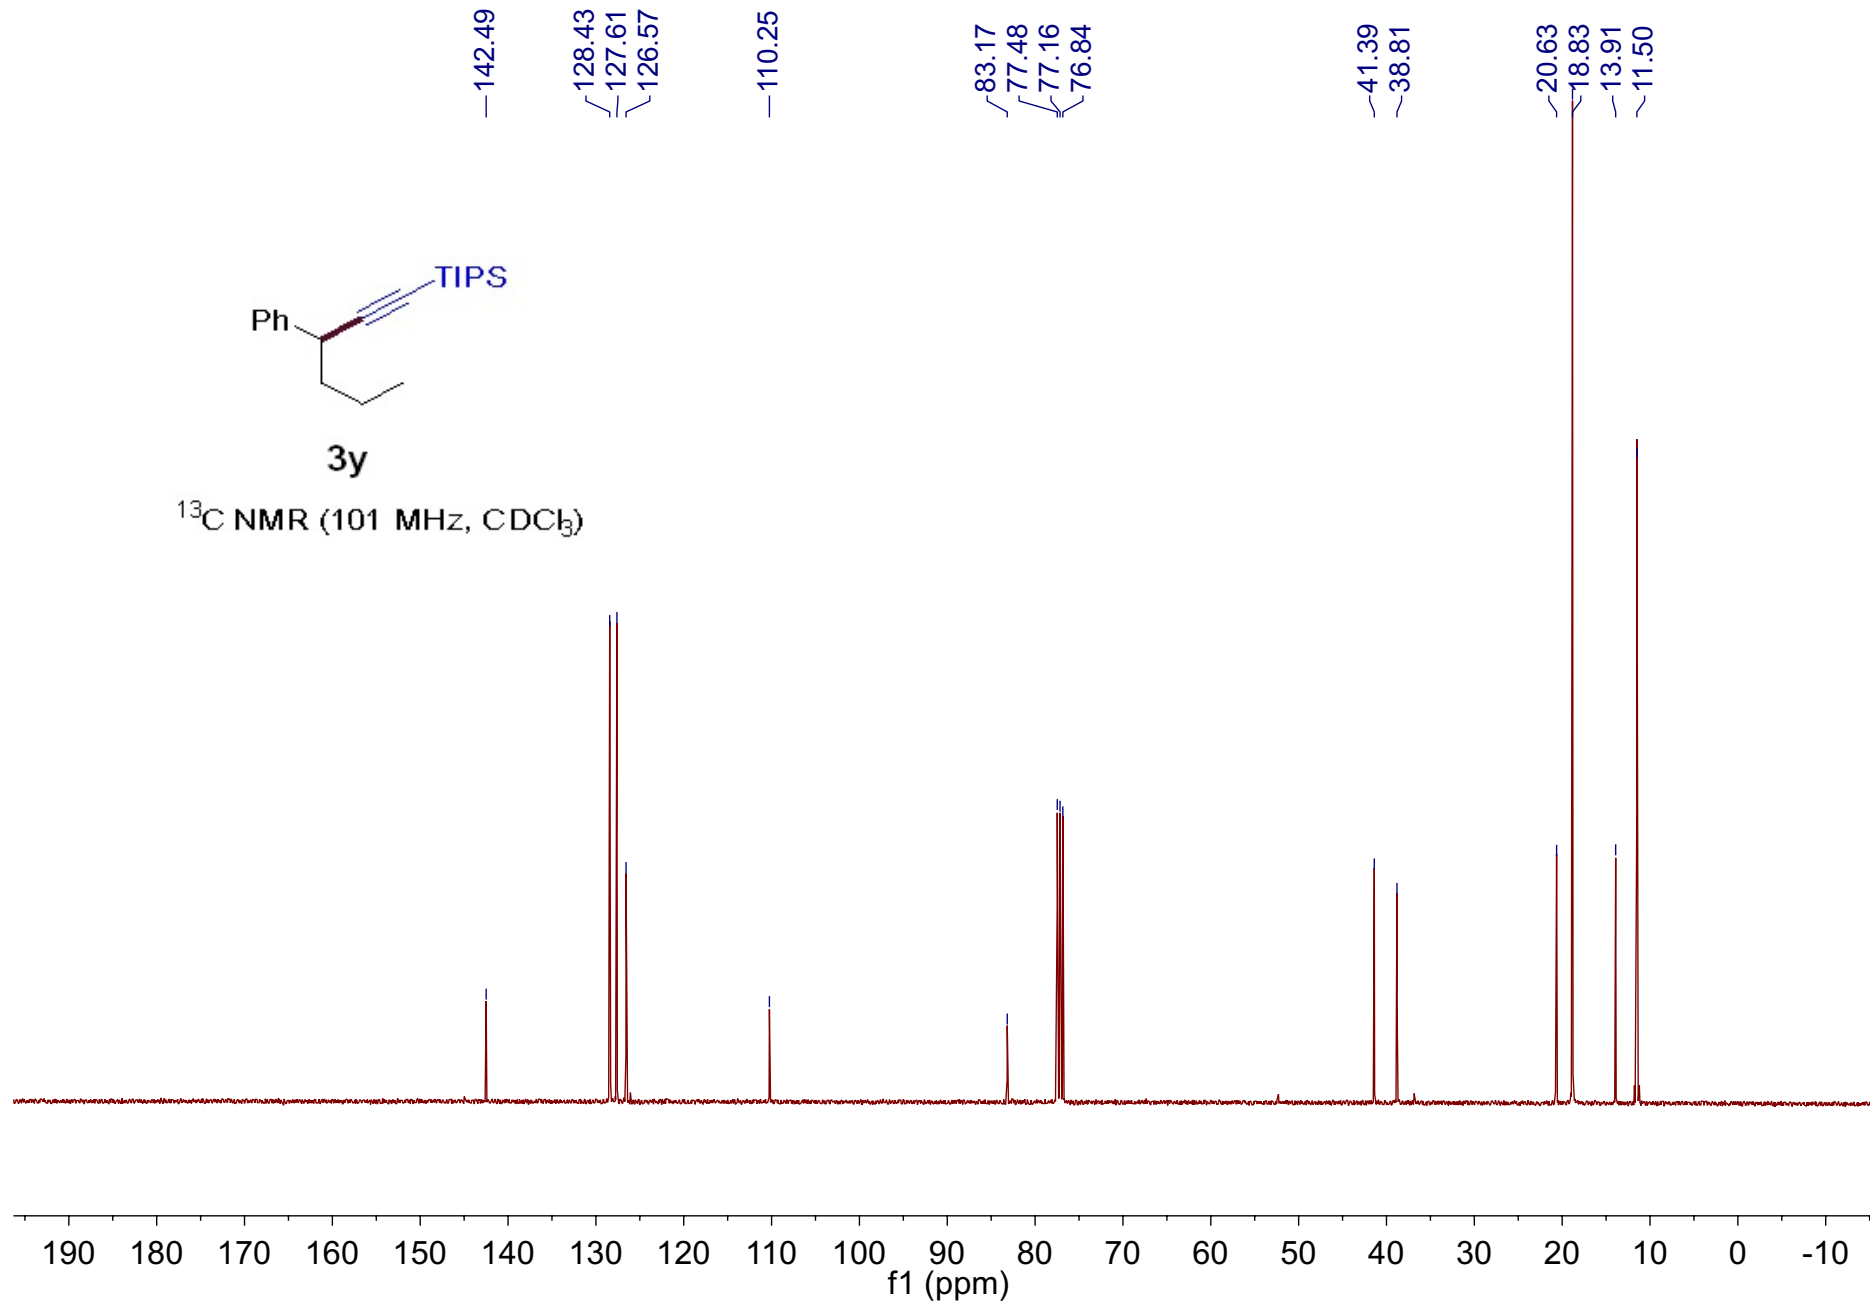

Supplementary Fig. 81. <sup>13</sup>C NMR (101 MHz, CDCl<sub>3</sub>) spectra for compound 3y

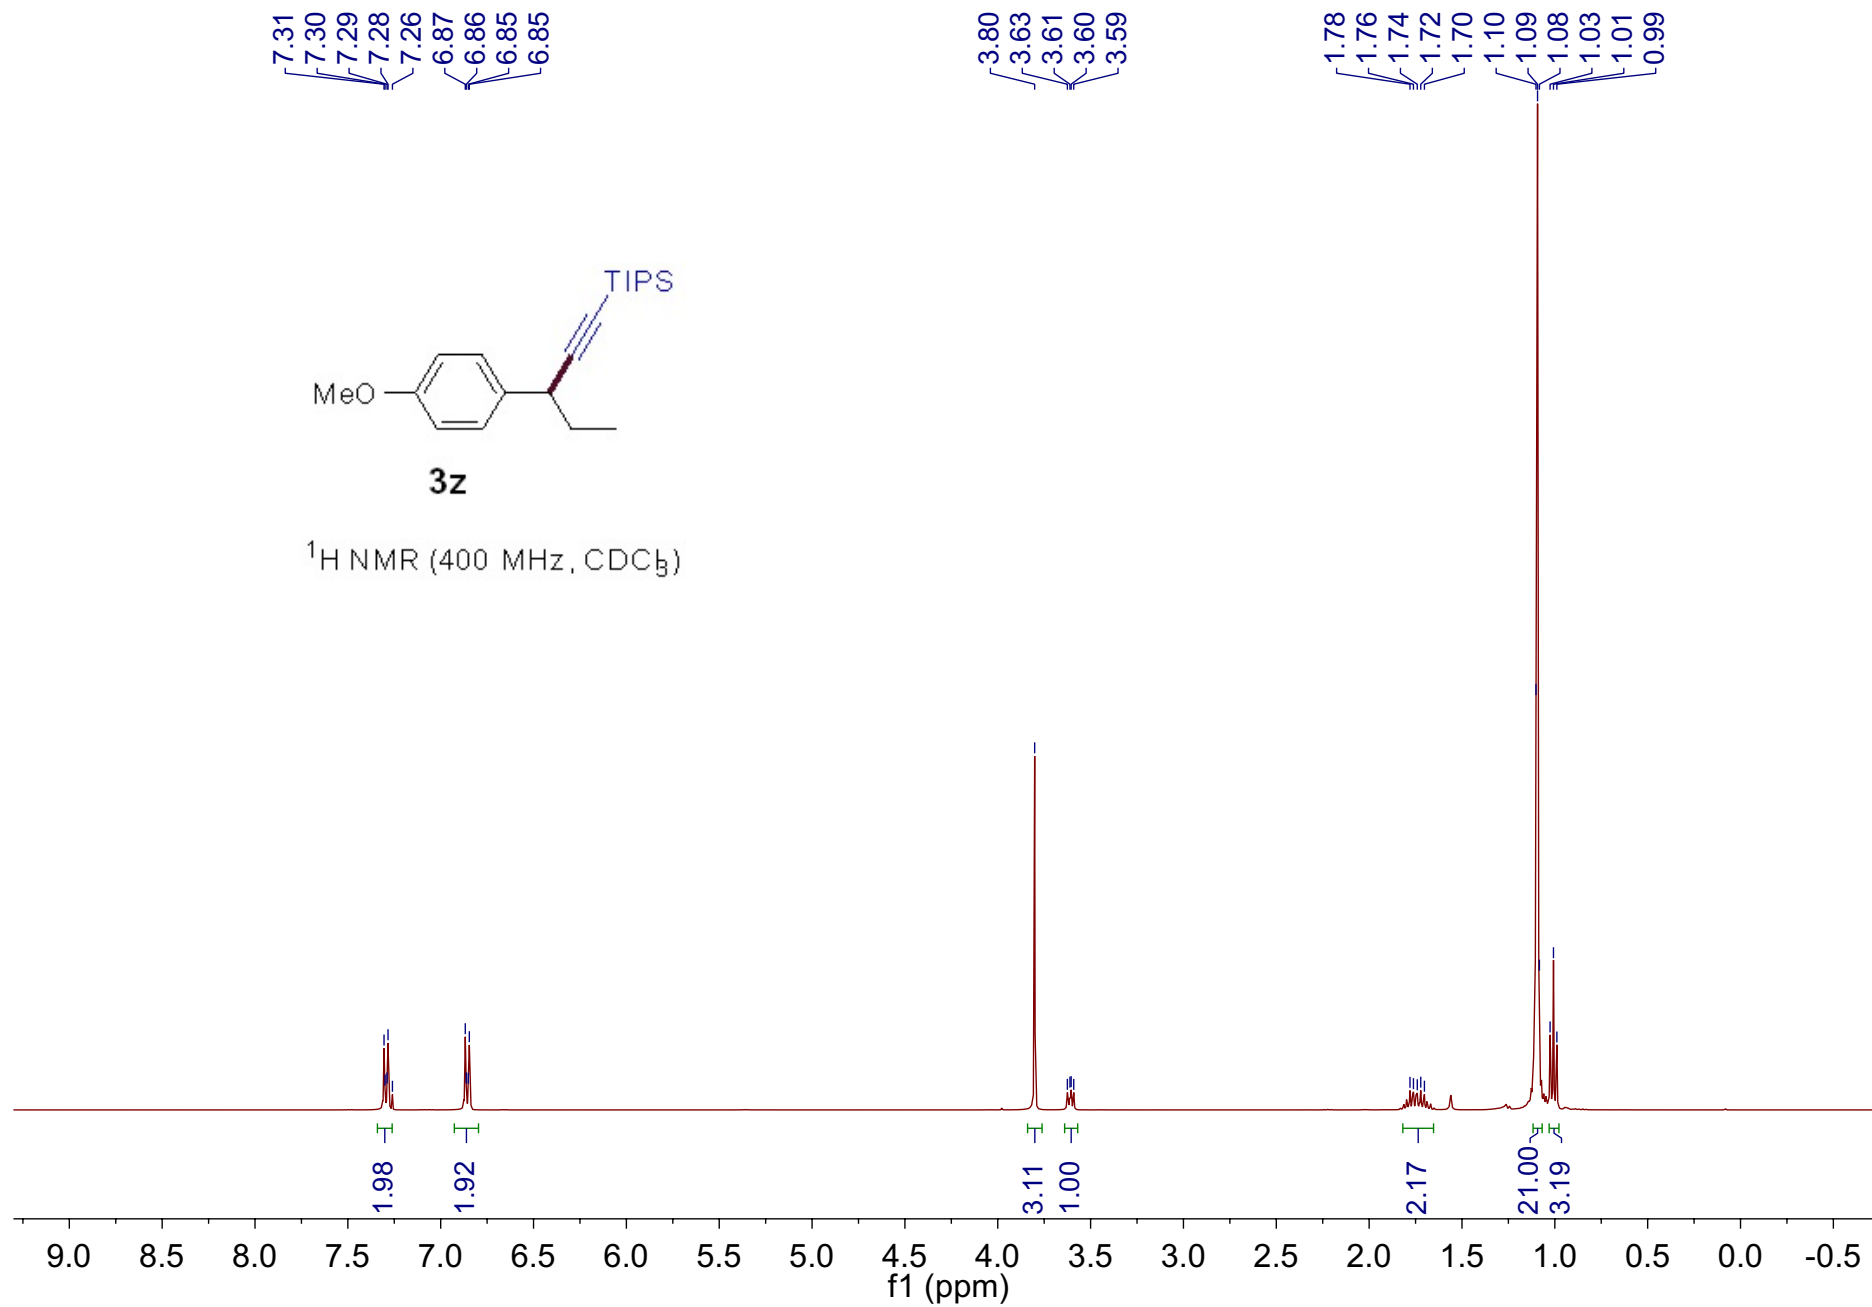

**Supplementary Fig. 82.** <sup>1</sup>H NMR (400 MHz, CDCl<sub>3</sub>) spectra for compound **3z**

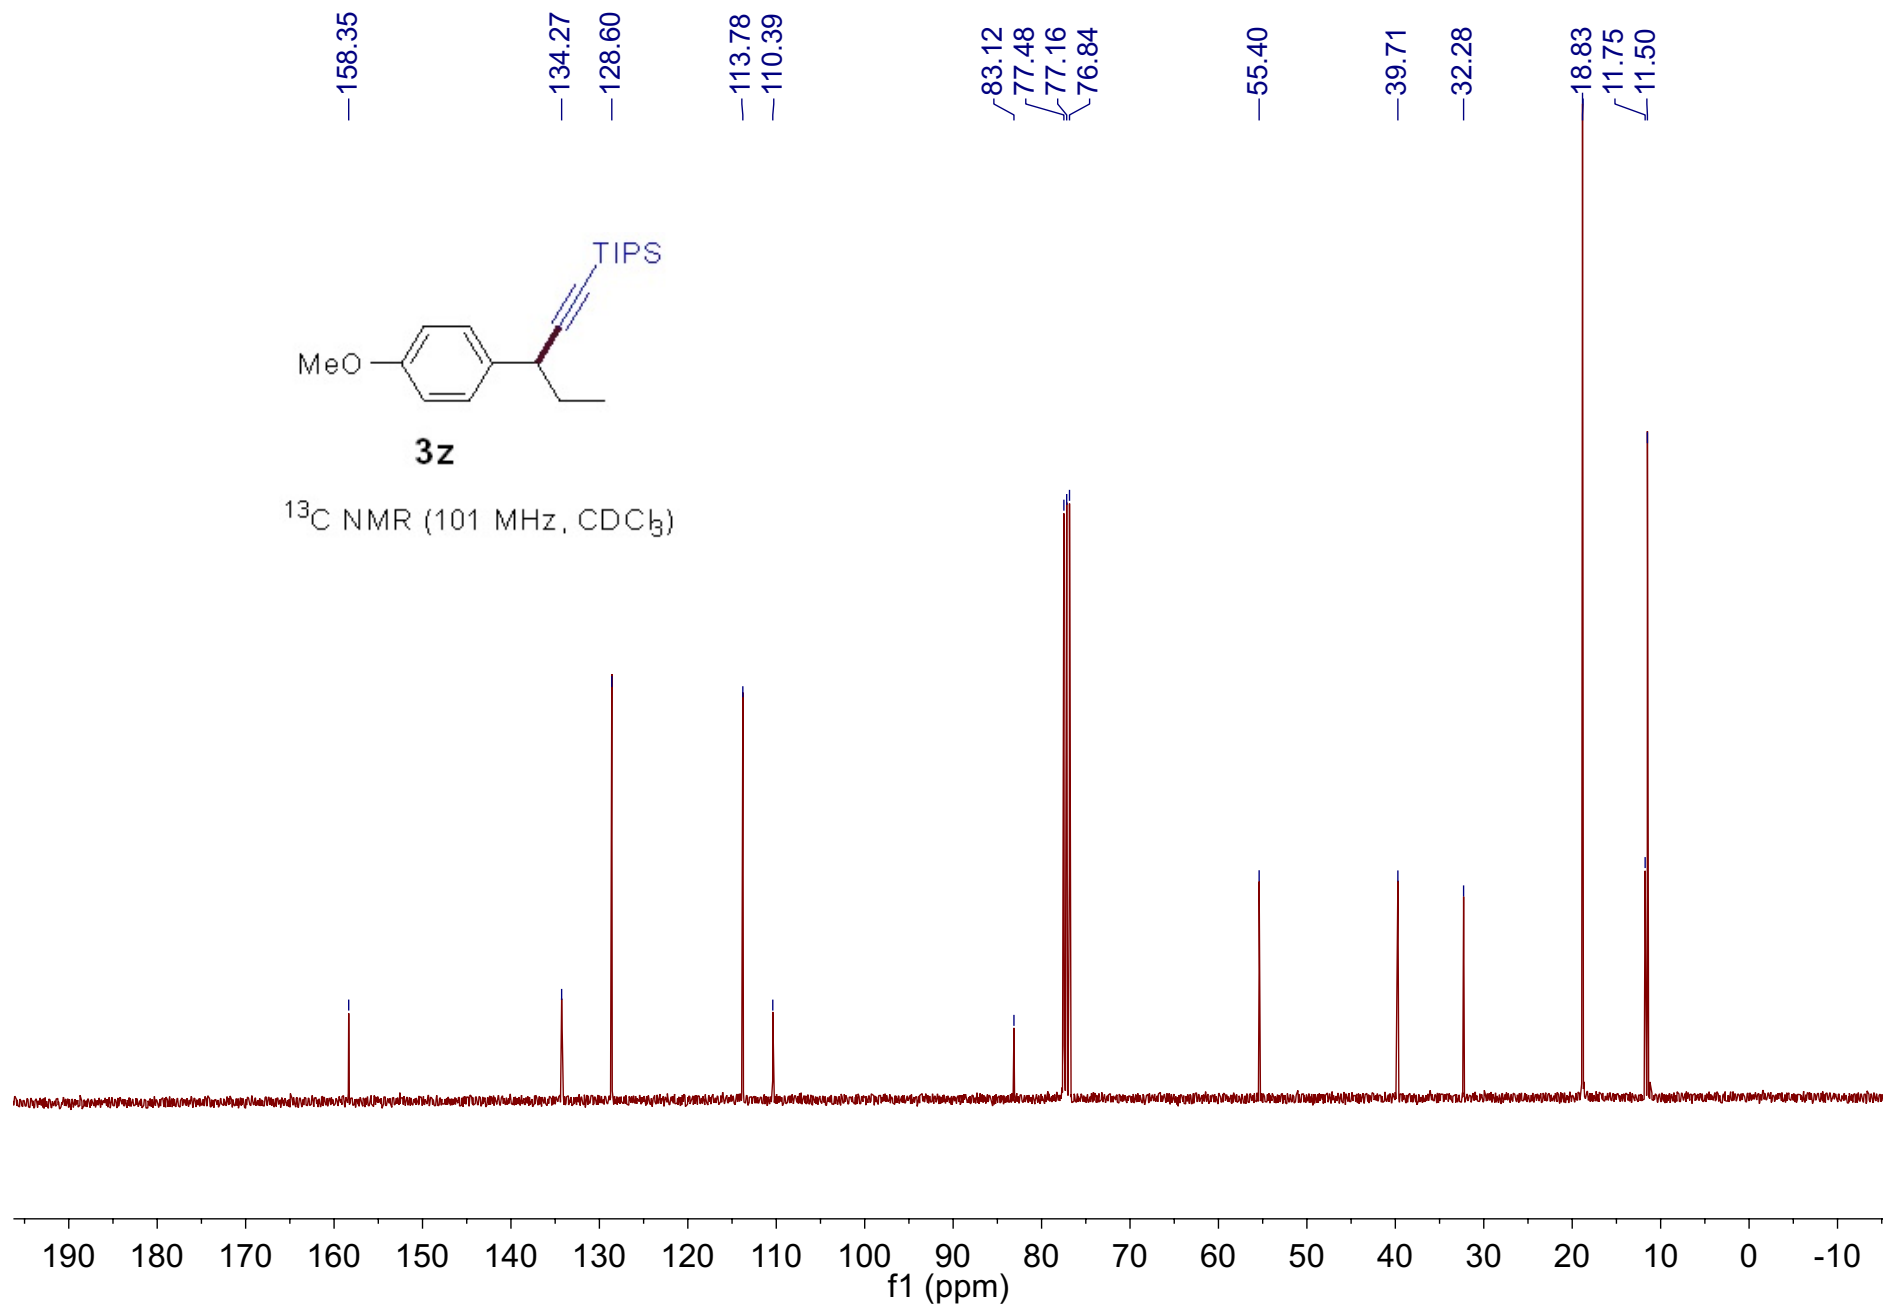

Supplementary Fig. 83.  $^{13}\text{C}$  NMR (101 MHz,  $\text{CDCl}_3$ ) spectra for compound **3z**

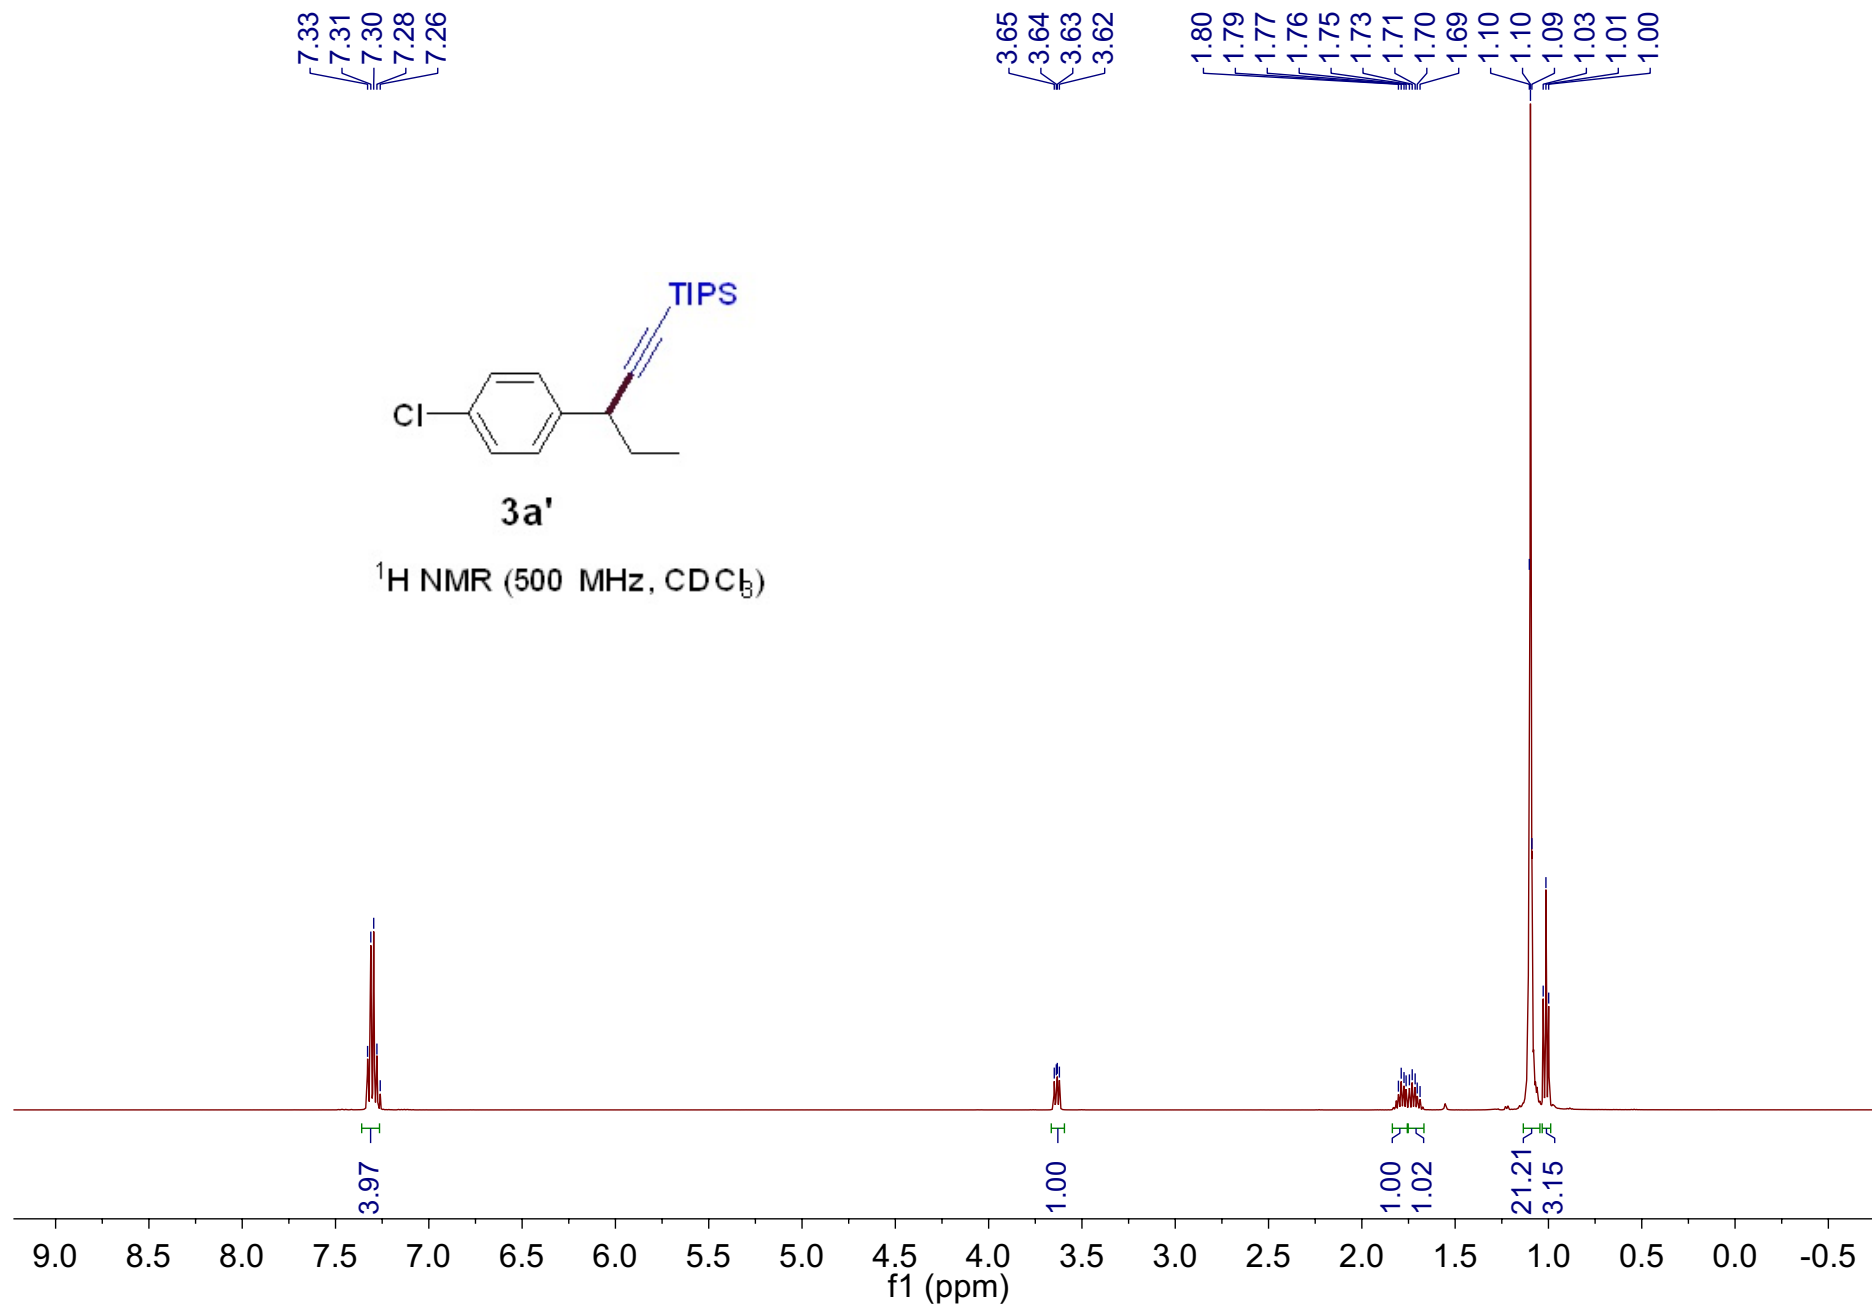

**Supplementary Fig. 84.** <sup>1</sup>H NMR (500 MHz, CDCl<sub>3</sub>) spectra for compound **3a'**



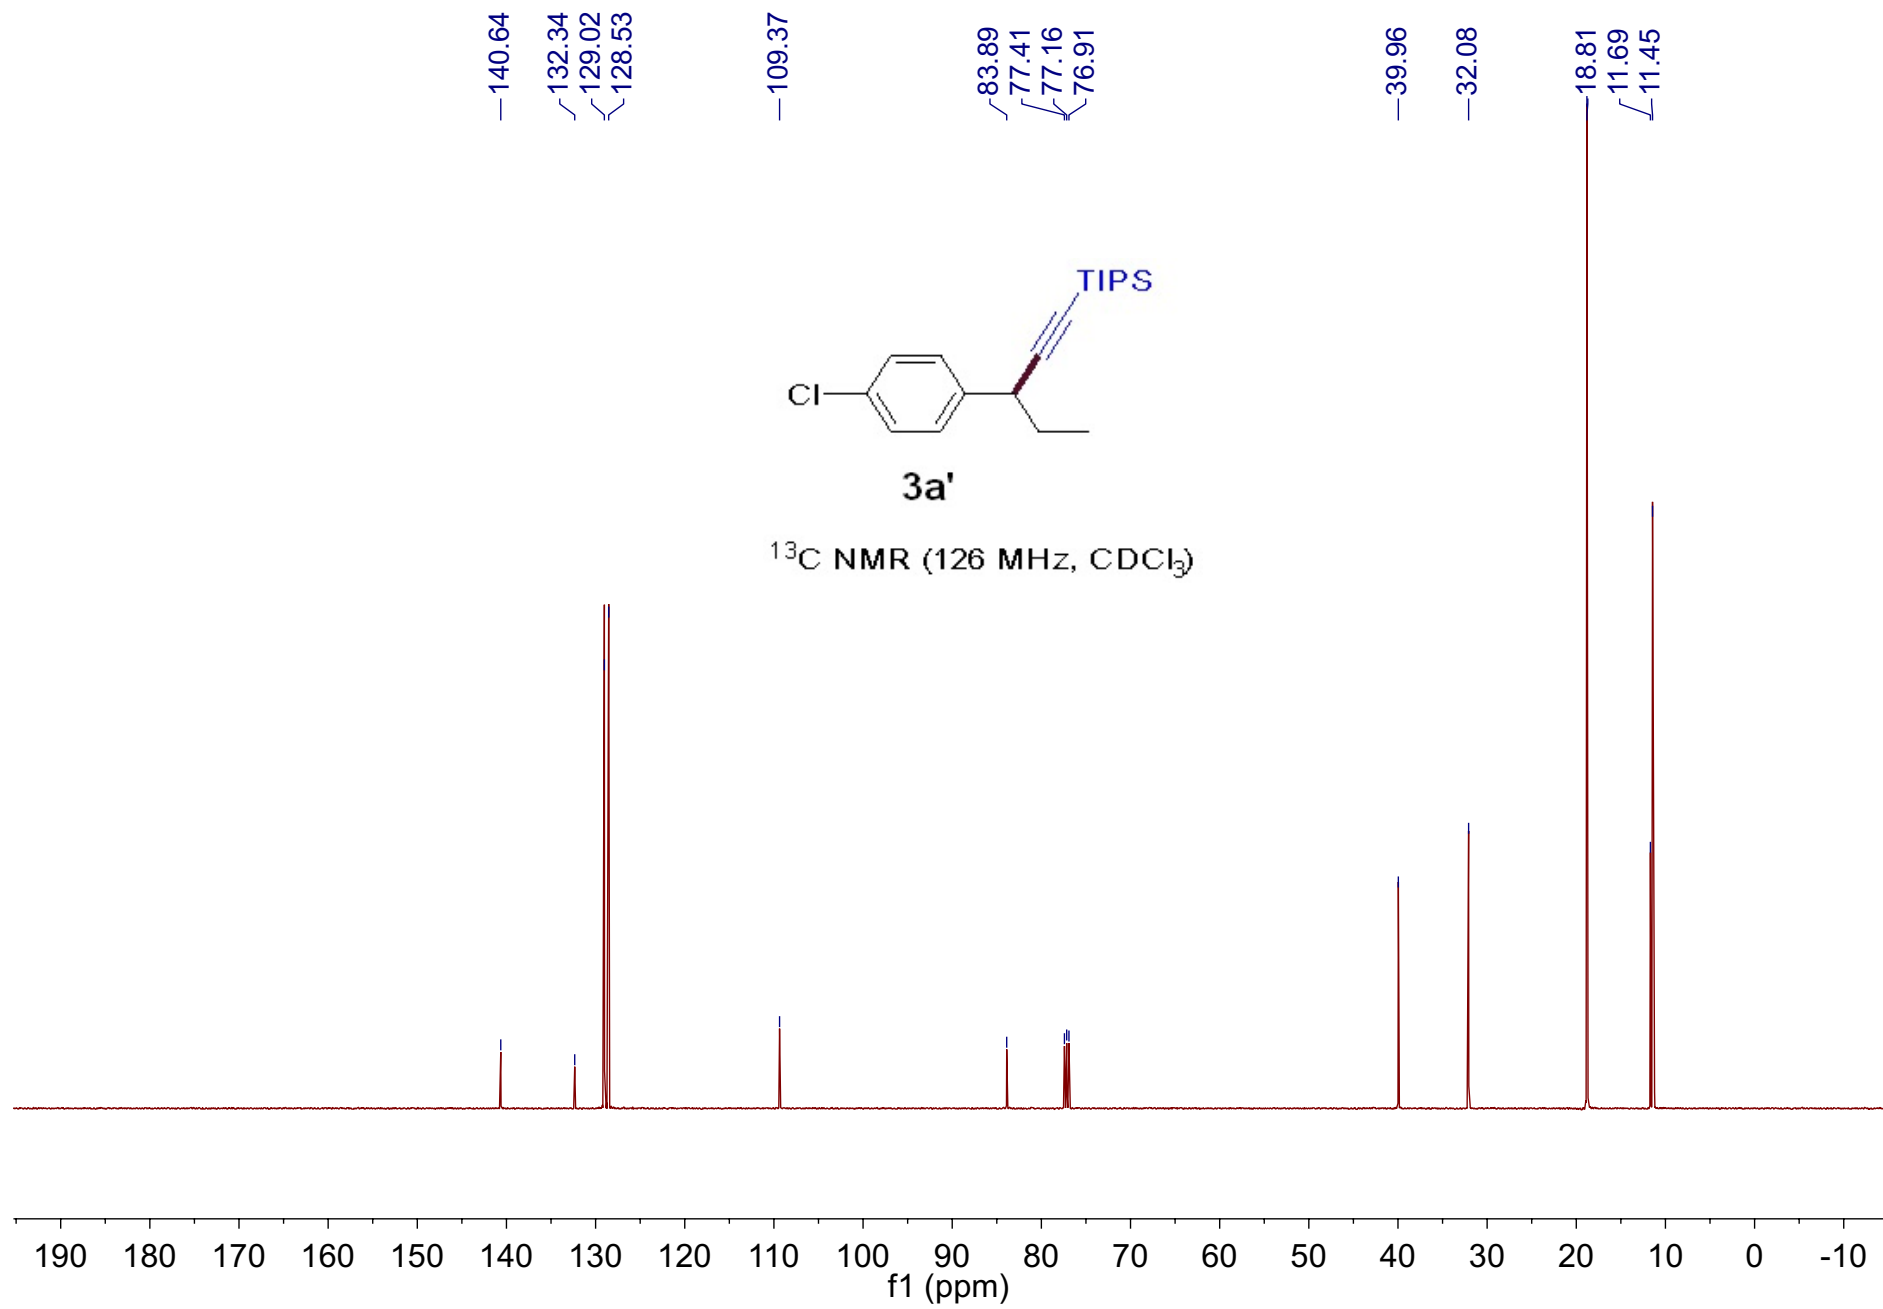

**Supplementary Fig. 85.**  $^{13}\text{C}$  NMR (126 MHz,  $\text{CDCl}_3$ ) spectra for compound **3a'**

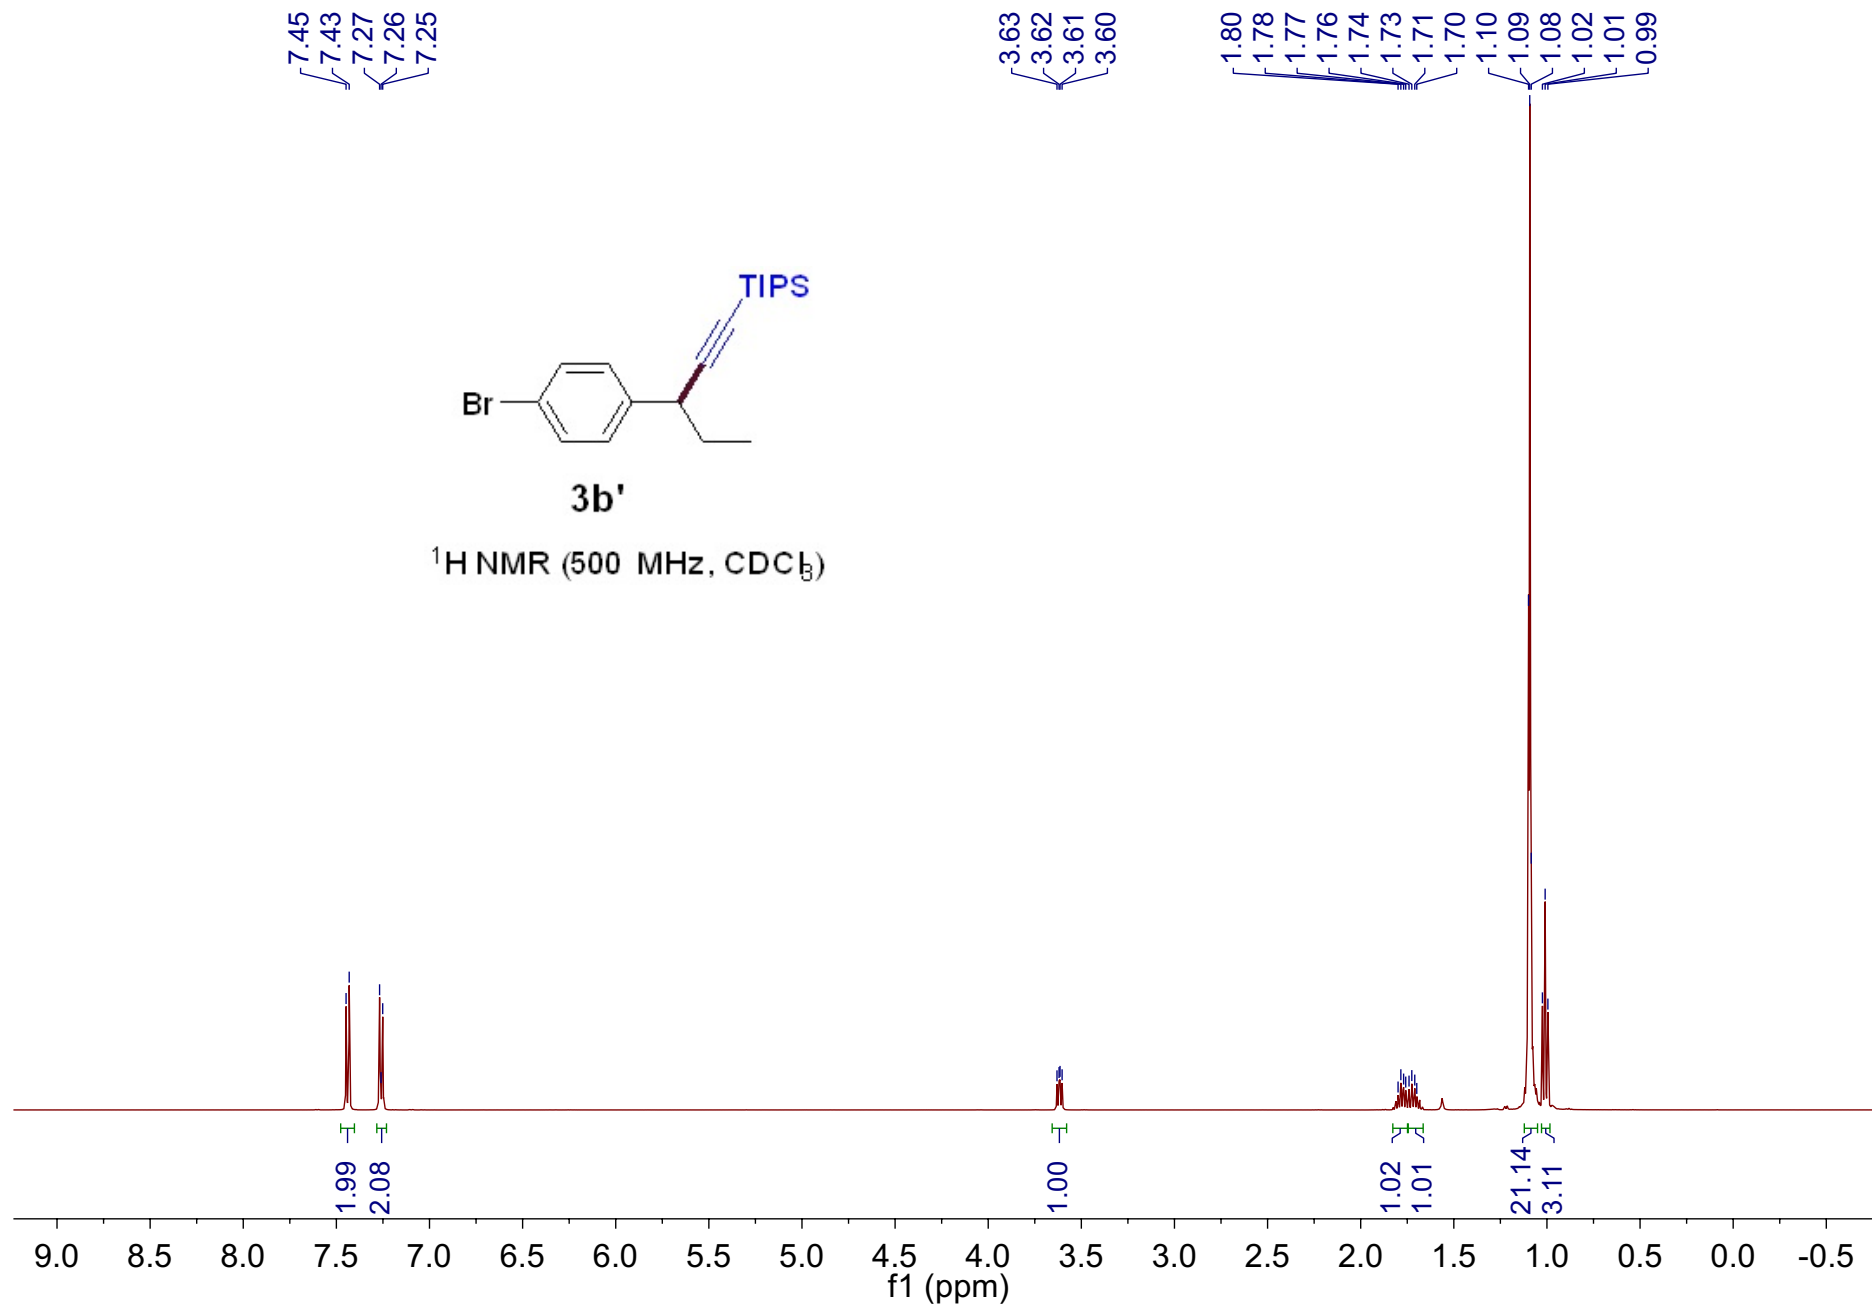

Supplementary Fig. 86. <sup>1</sup>H NMR (500 MHz, CDCl<sub>3</sub>) spectra for compound **3b'**

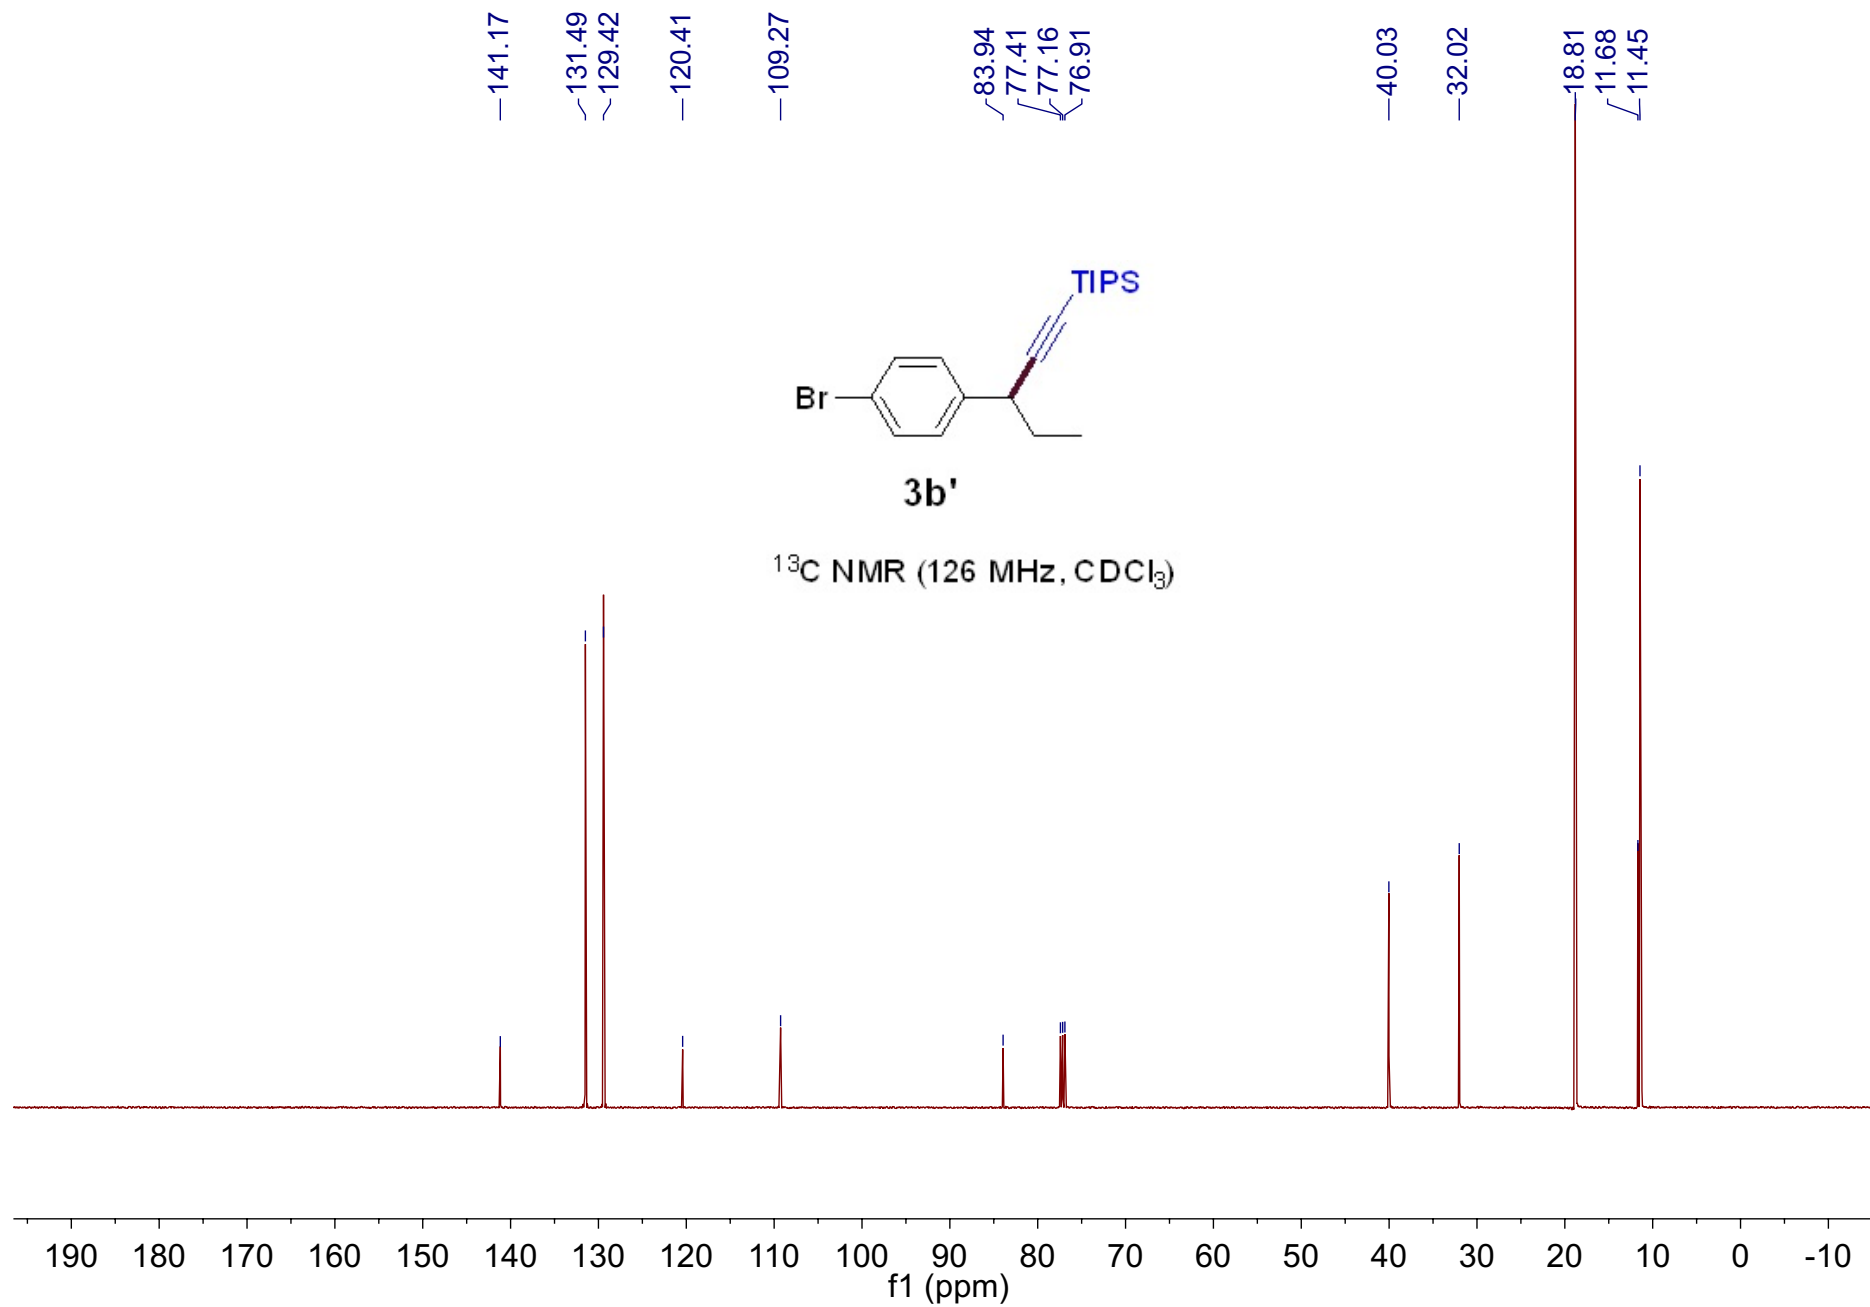

**Supplementary Fig. 87.**  $^{13}\text{C}$  NMR (126 MHz,  $\text{CDCl}_3$ ) spectra for compound **3b'**

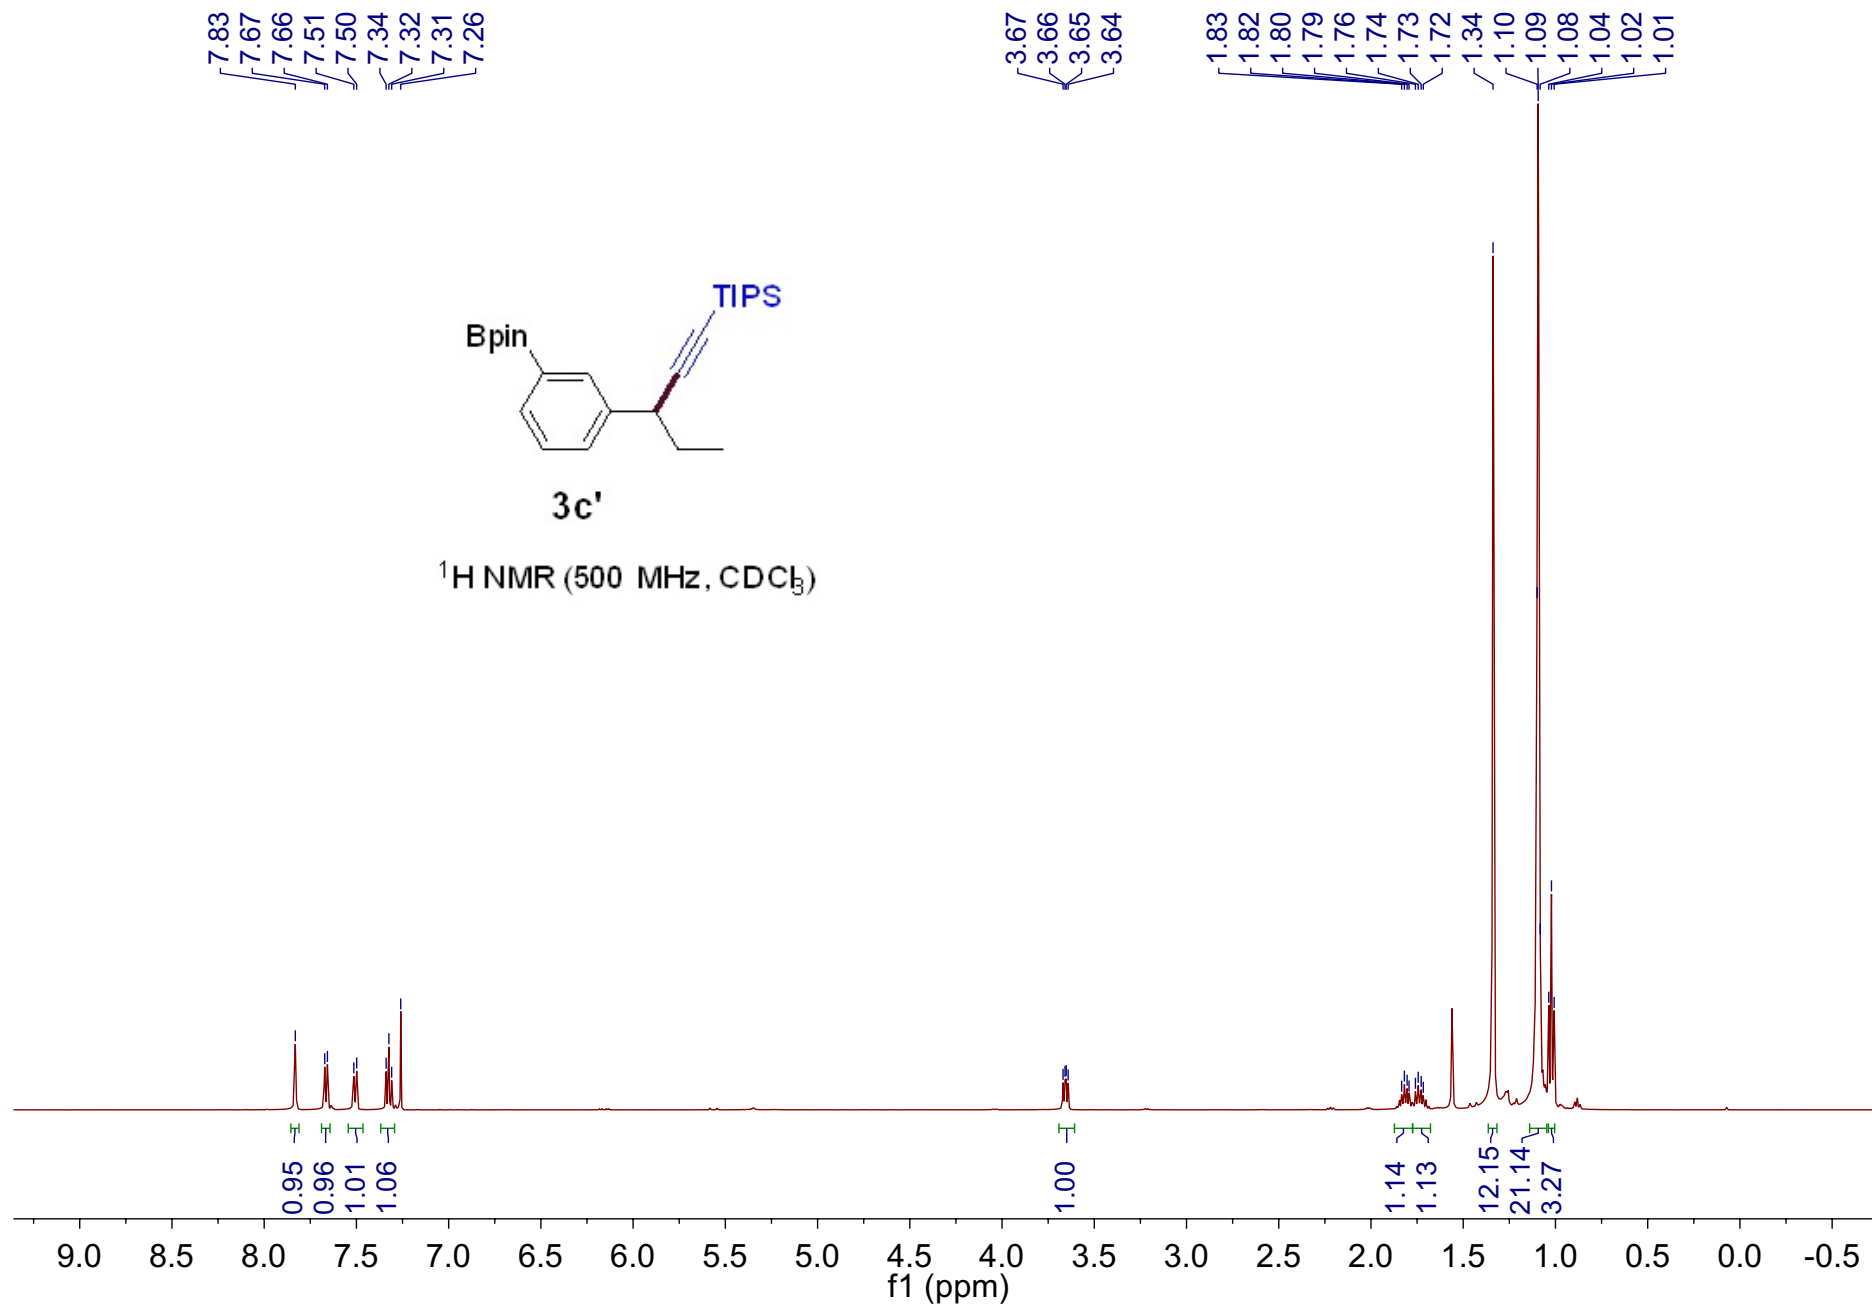

**Supplementary Fig. 88.** <sup>1</sup>H NMR (500 MHz, CDCl<sub>3</sub>) spectra for compound **3c'**

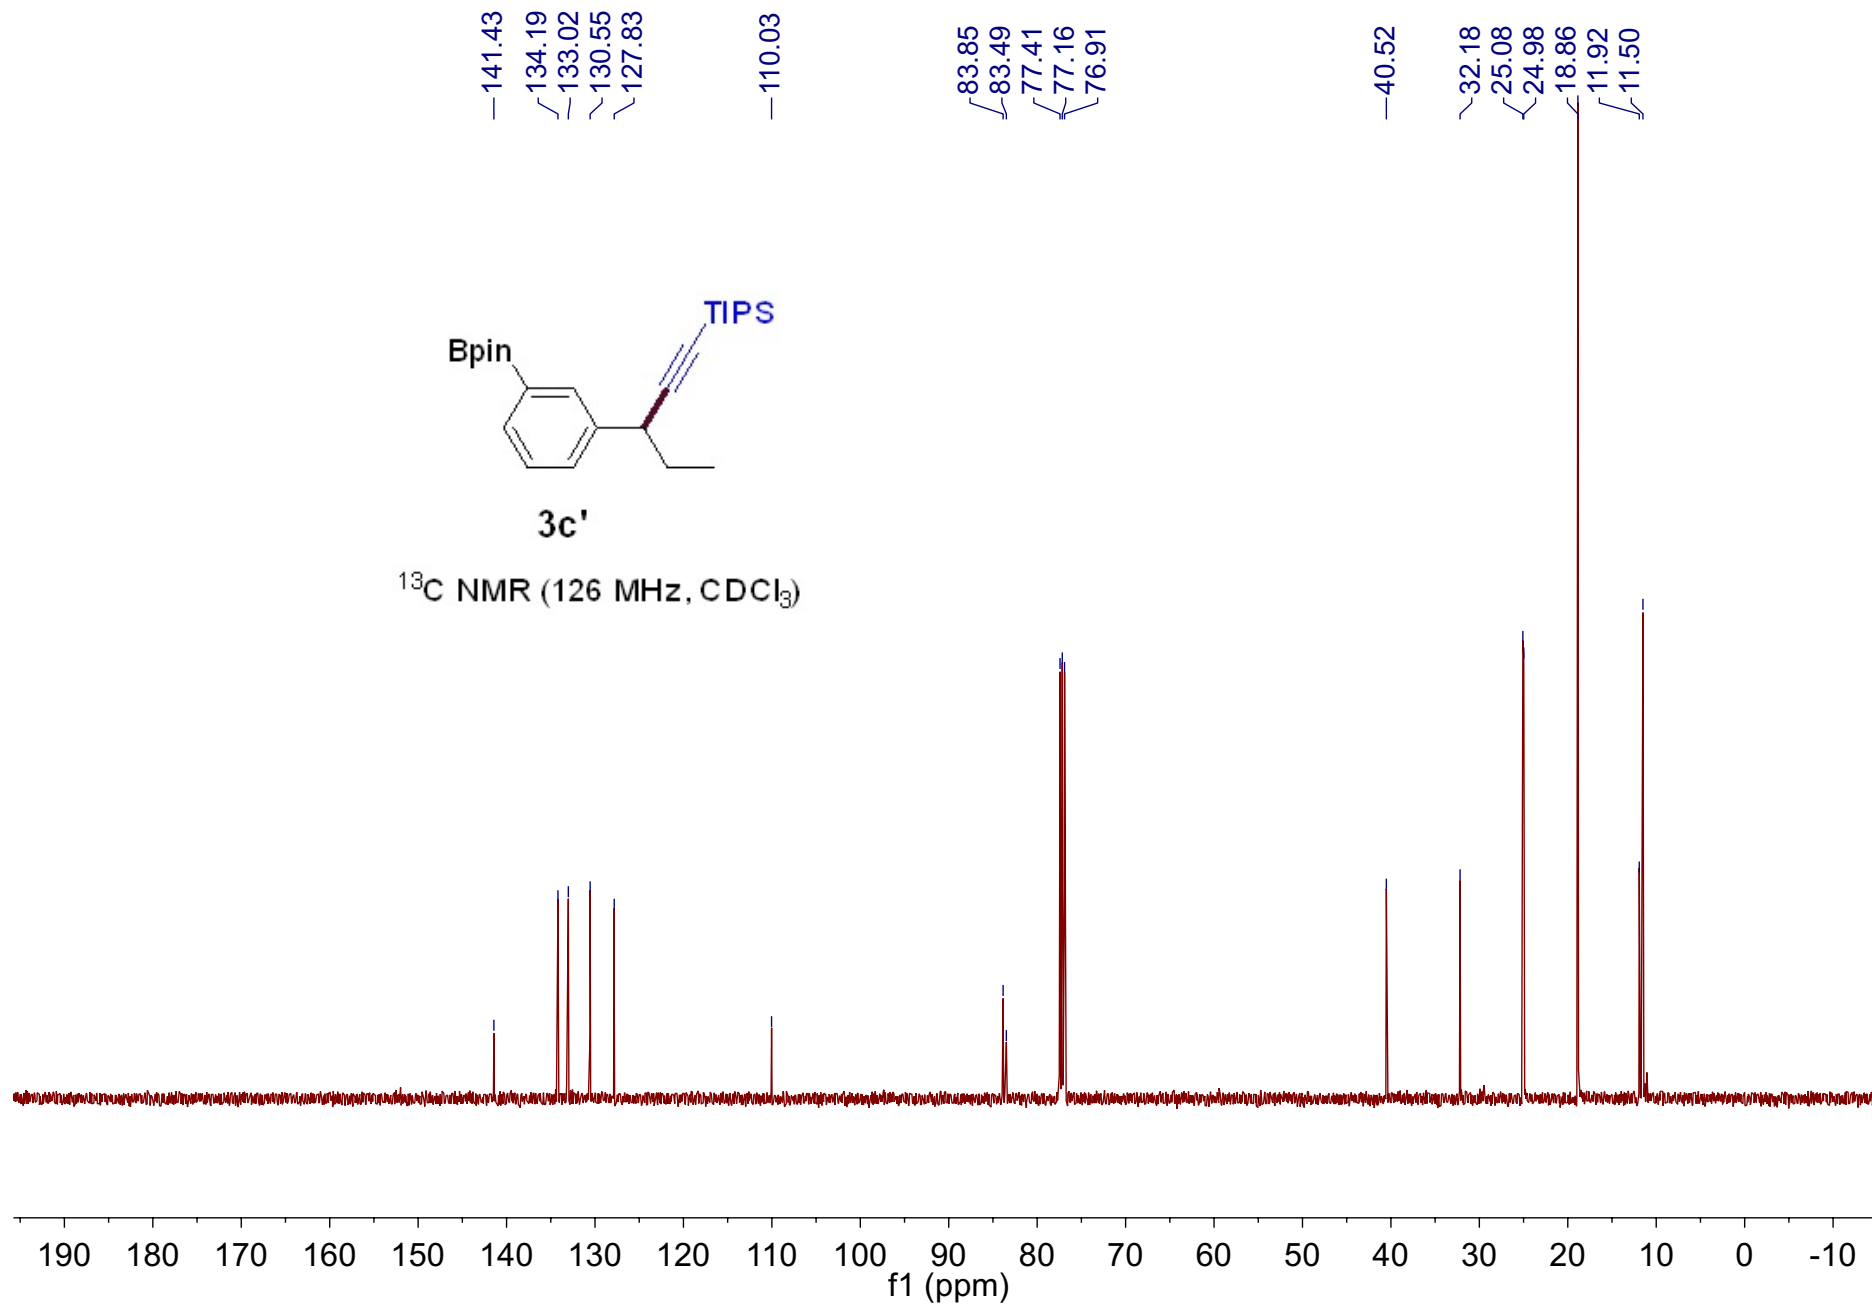

**Supplementary Fig. 89.**  $^{13}\text{C}$  NMR (126 MHz,  $\text{CDCl}_3$ ) spectra for compound **3c'**

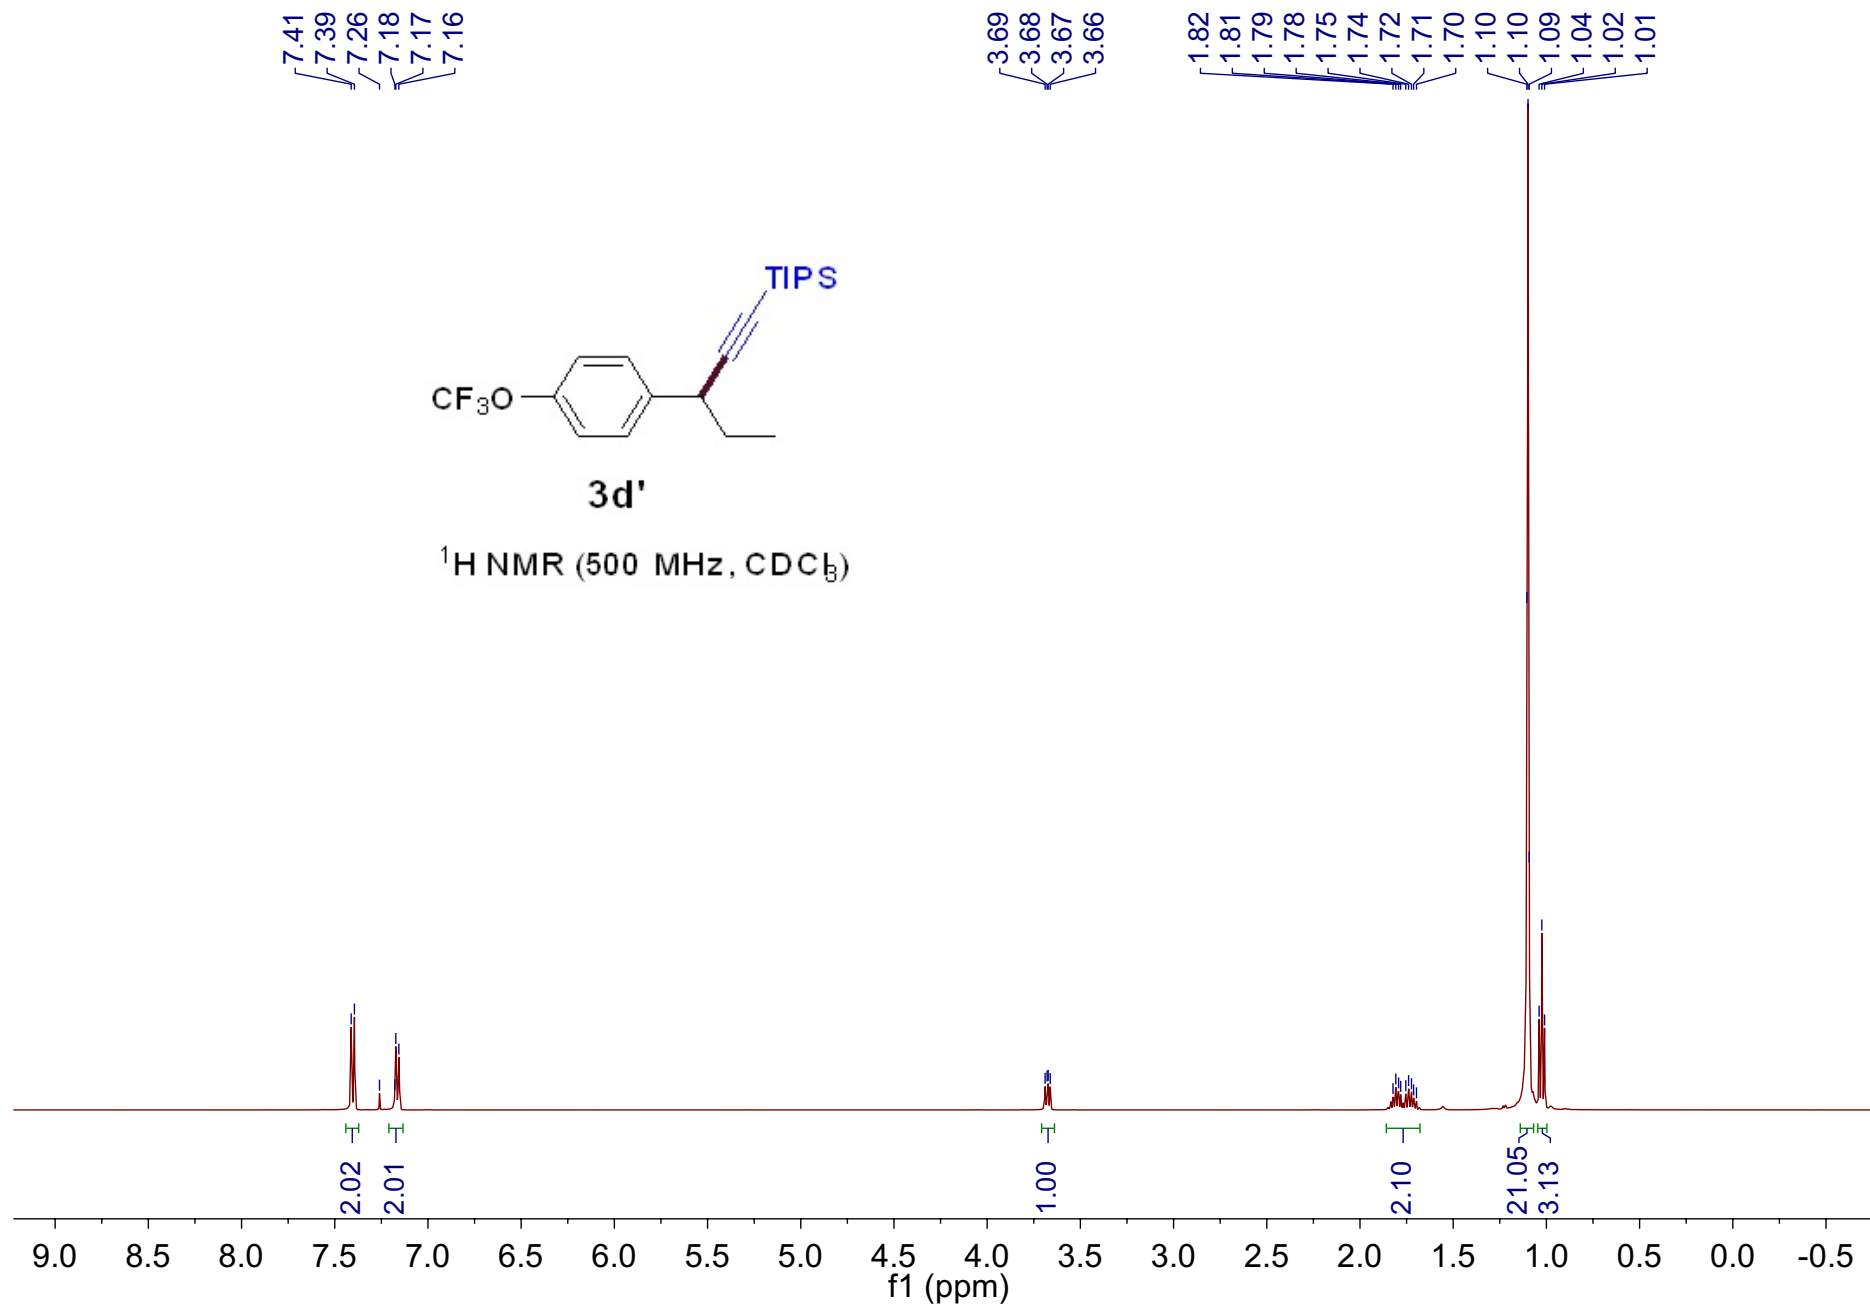

**Supplementary Fig. 90.** <sup>1</sup>H NMR (500 MHz, CDCl<sub>3</sub>) spectra for compound **3d'**

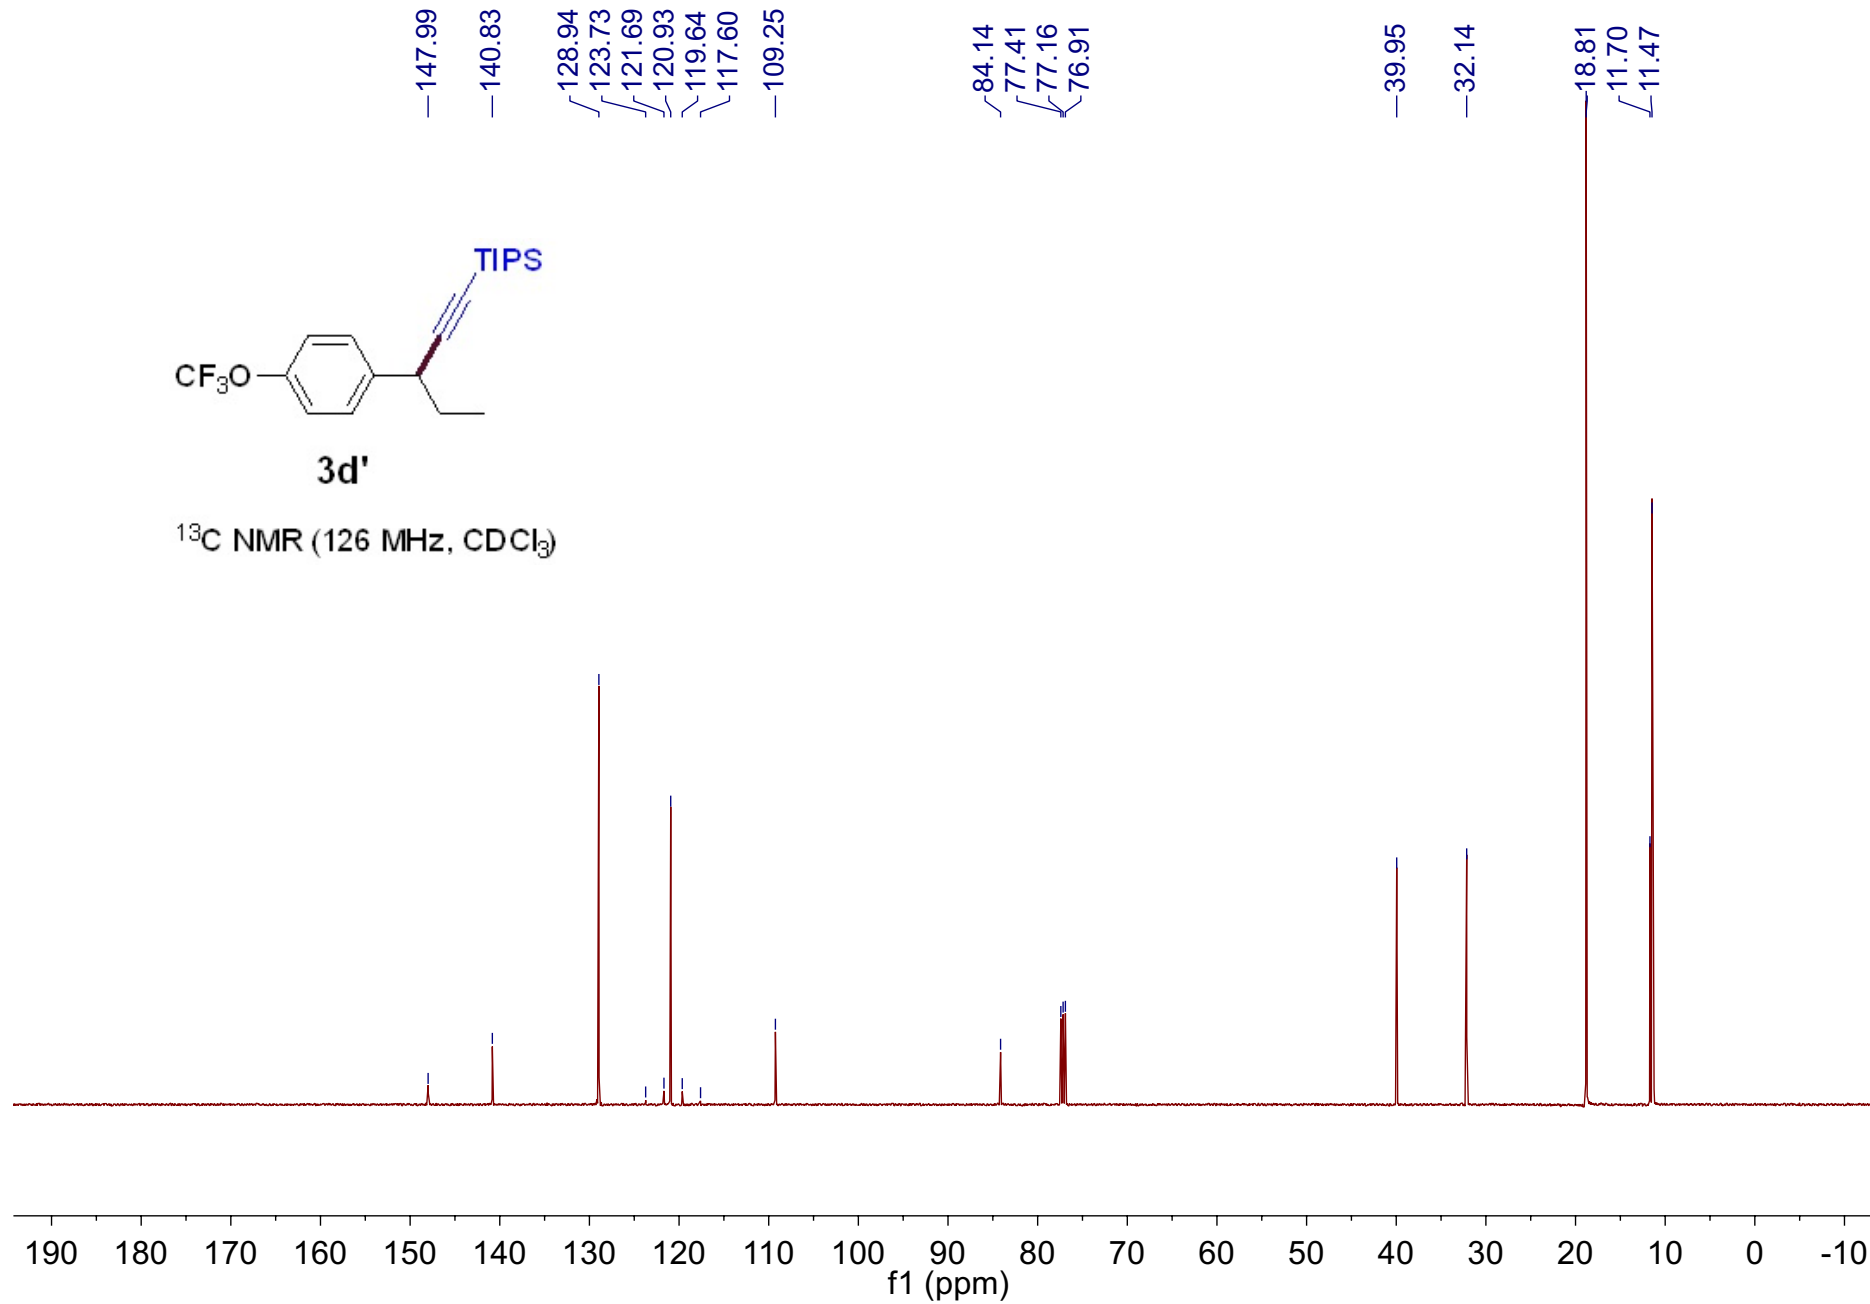

**Supplementary Fig. 91.** <sup>13</sup>C NMR (126 MHz, CDCl<sub>3</sub>) spectra for compound **3d'**

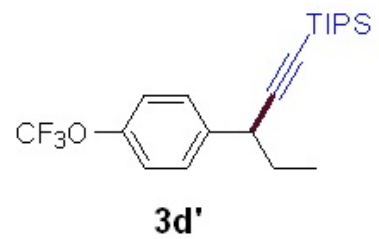

$^{19}\text{F}$  NMR (471 MHz,  $\text{CDCl}_3$ )

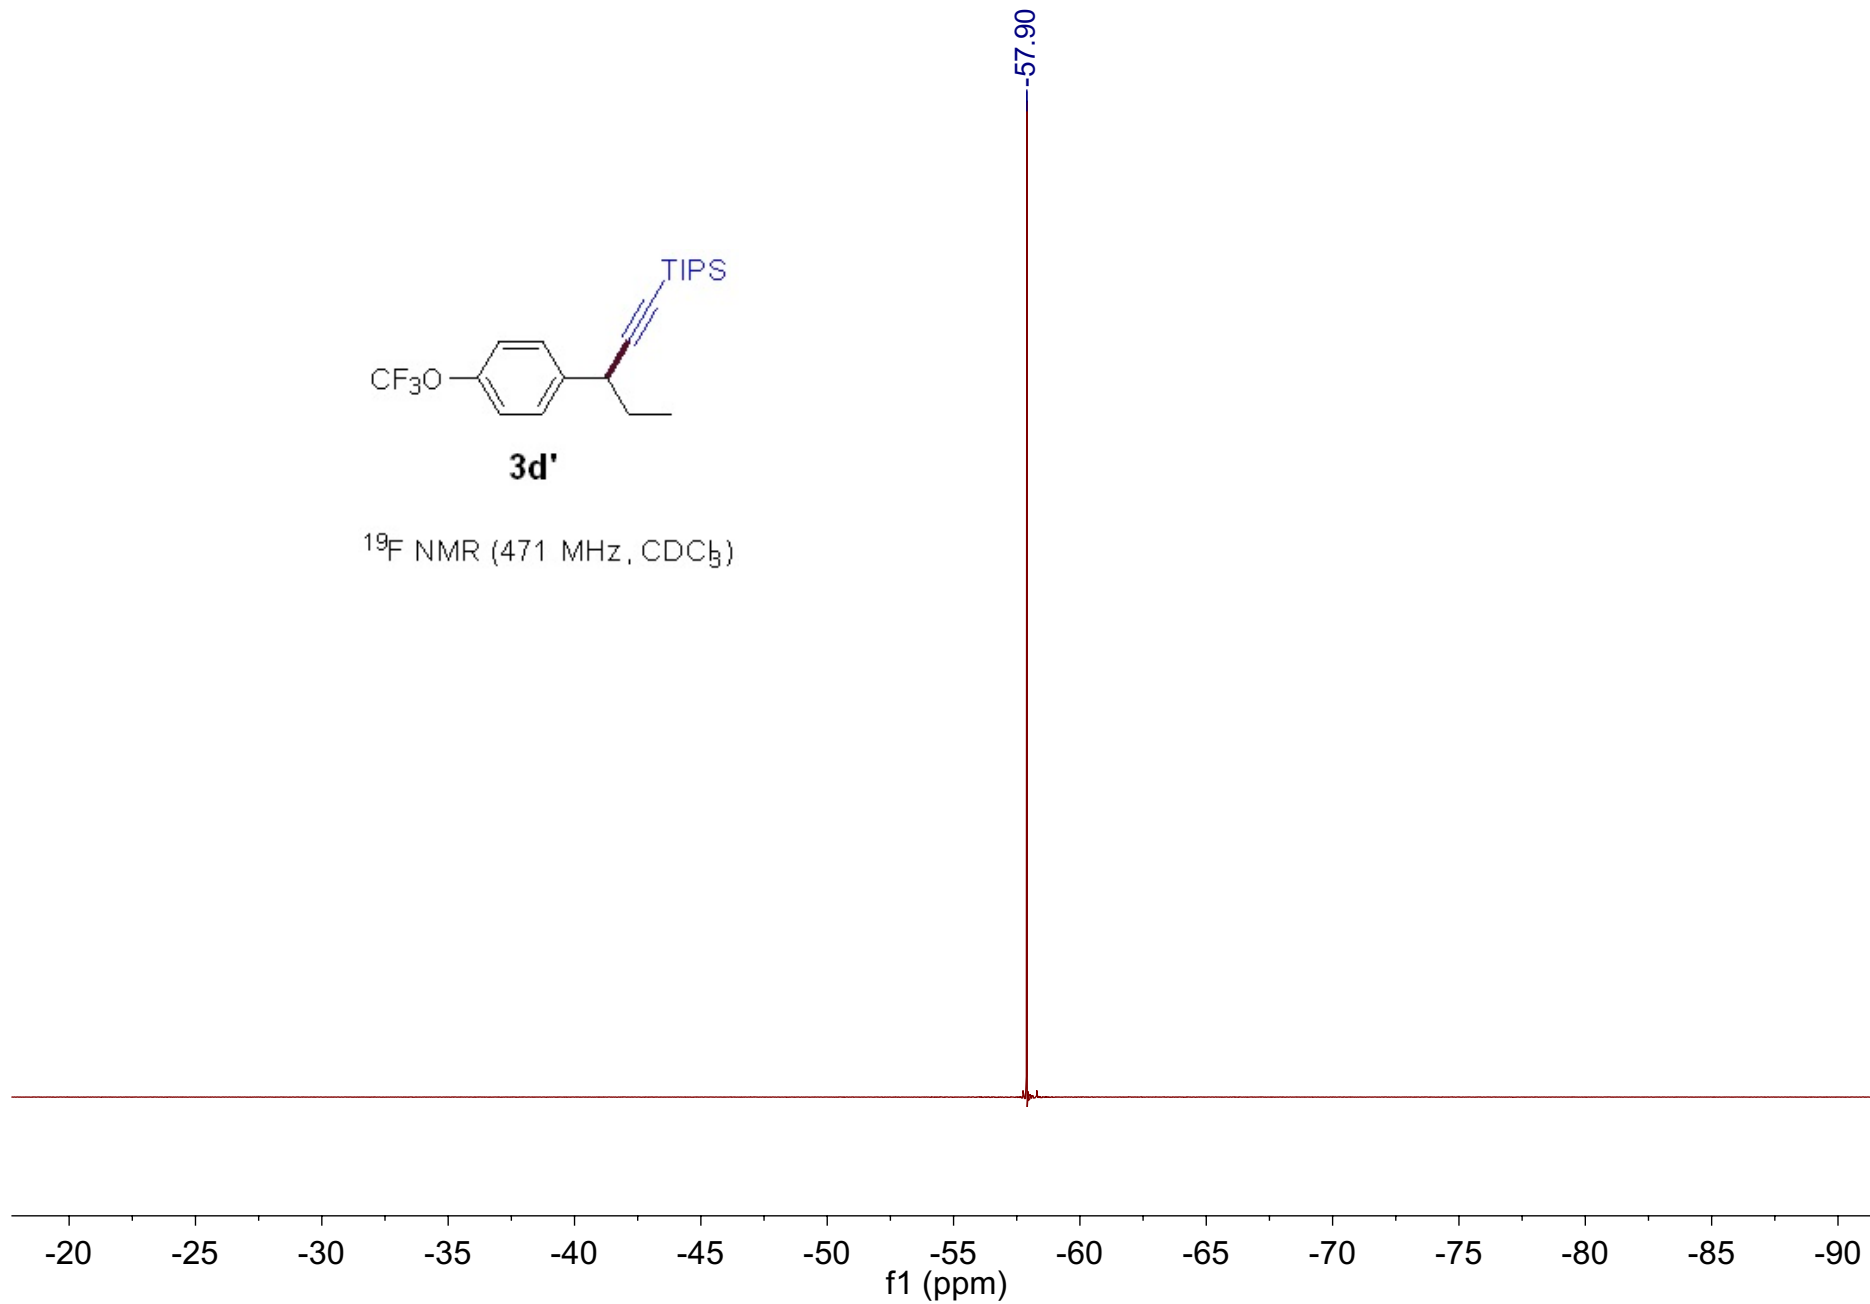

**Supplementary Fig. 92.**  $^{19}\text{F}$  NMR (471 MHz,  $\text{CDCl}_3$ ) spectra for compound **3d'**



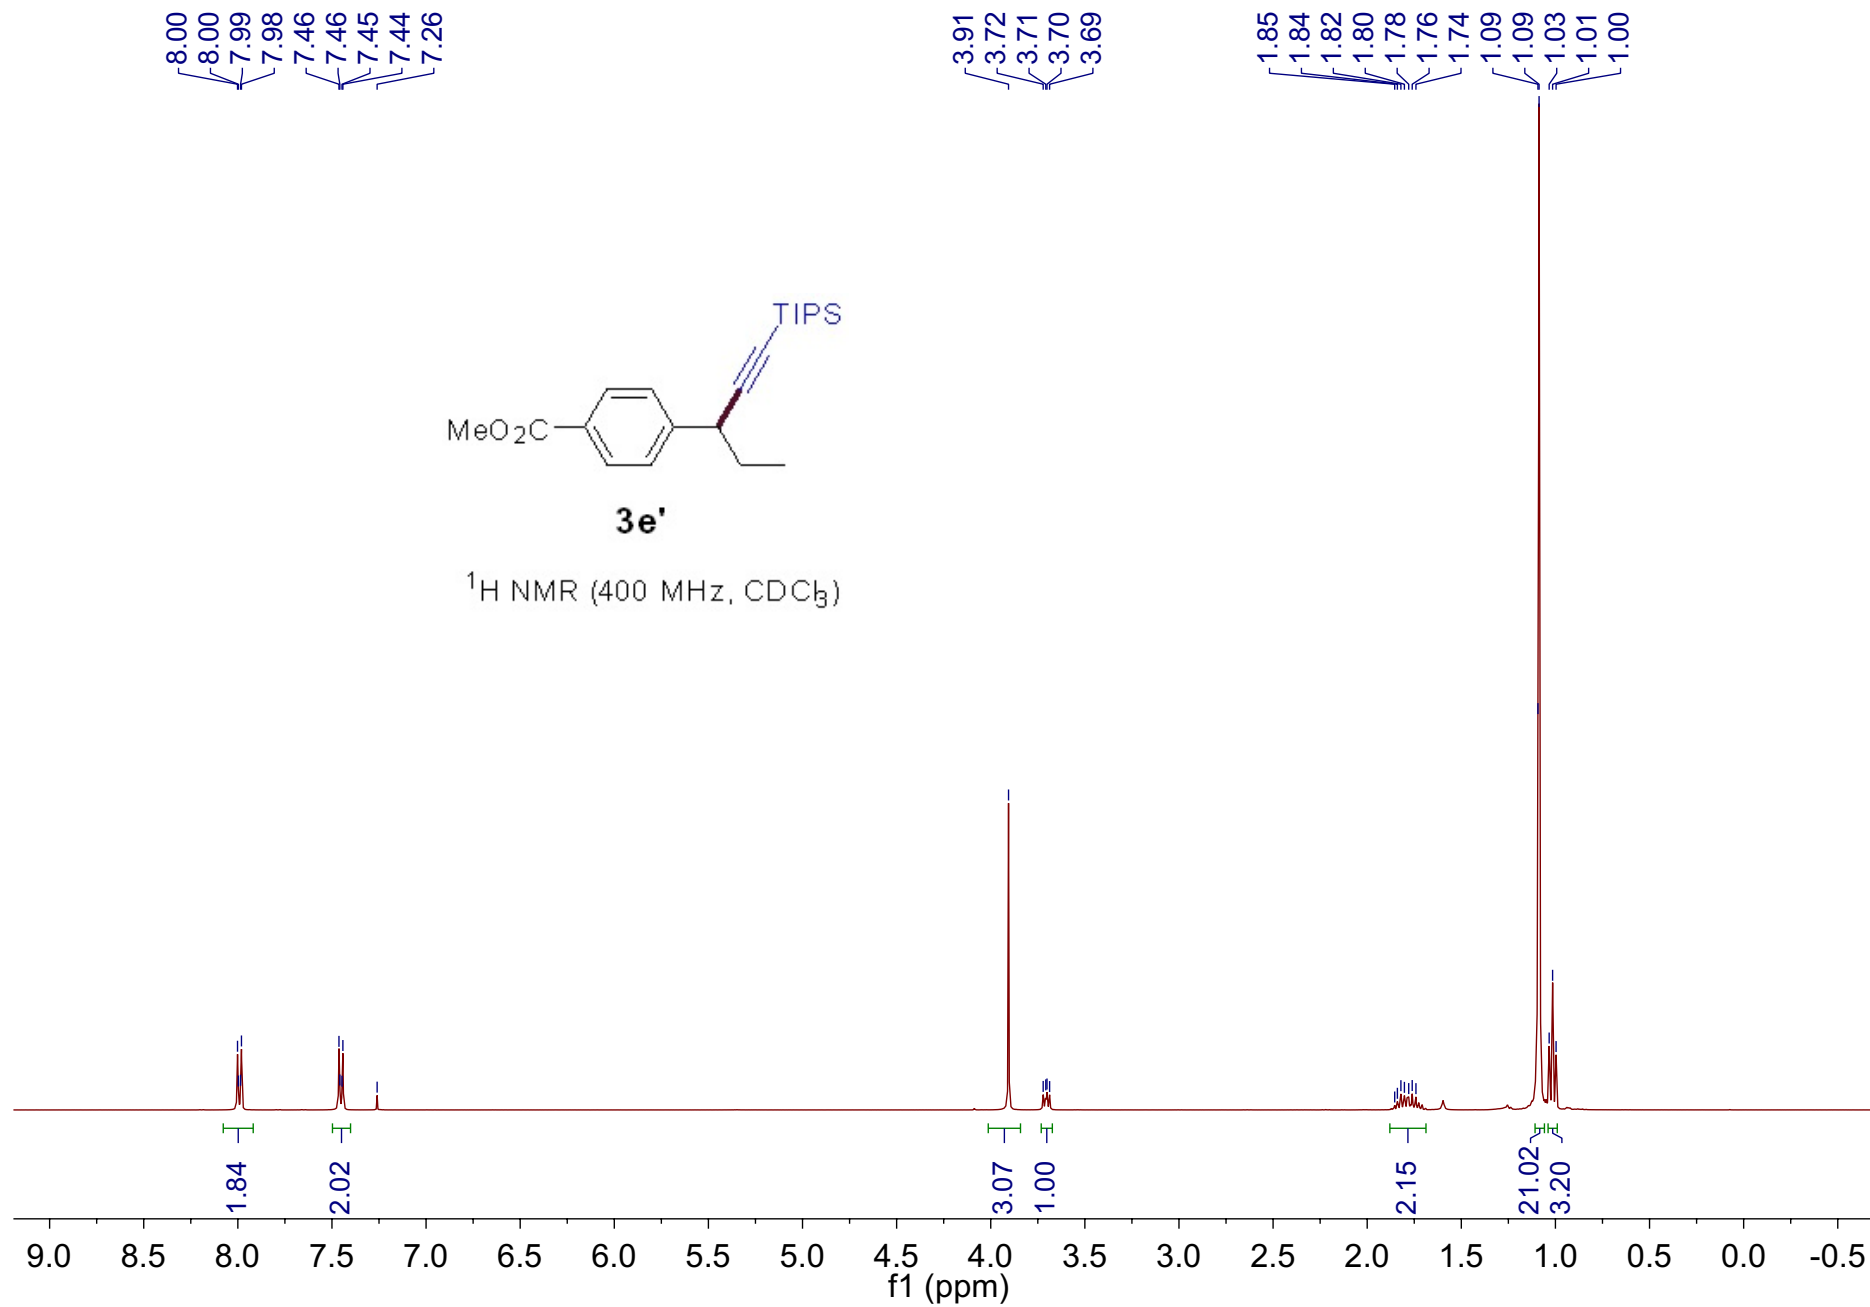

**Supplementary Fig. 93.** <sup>1</sup>H NMR (400 MHz, CDCl<sub>3</sub>) spectra for compound **3e'**

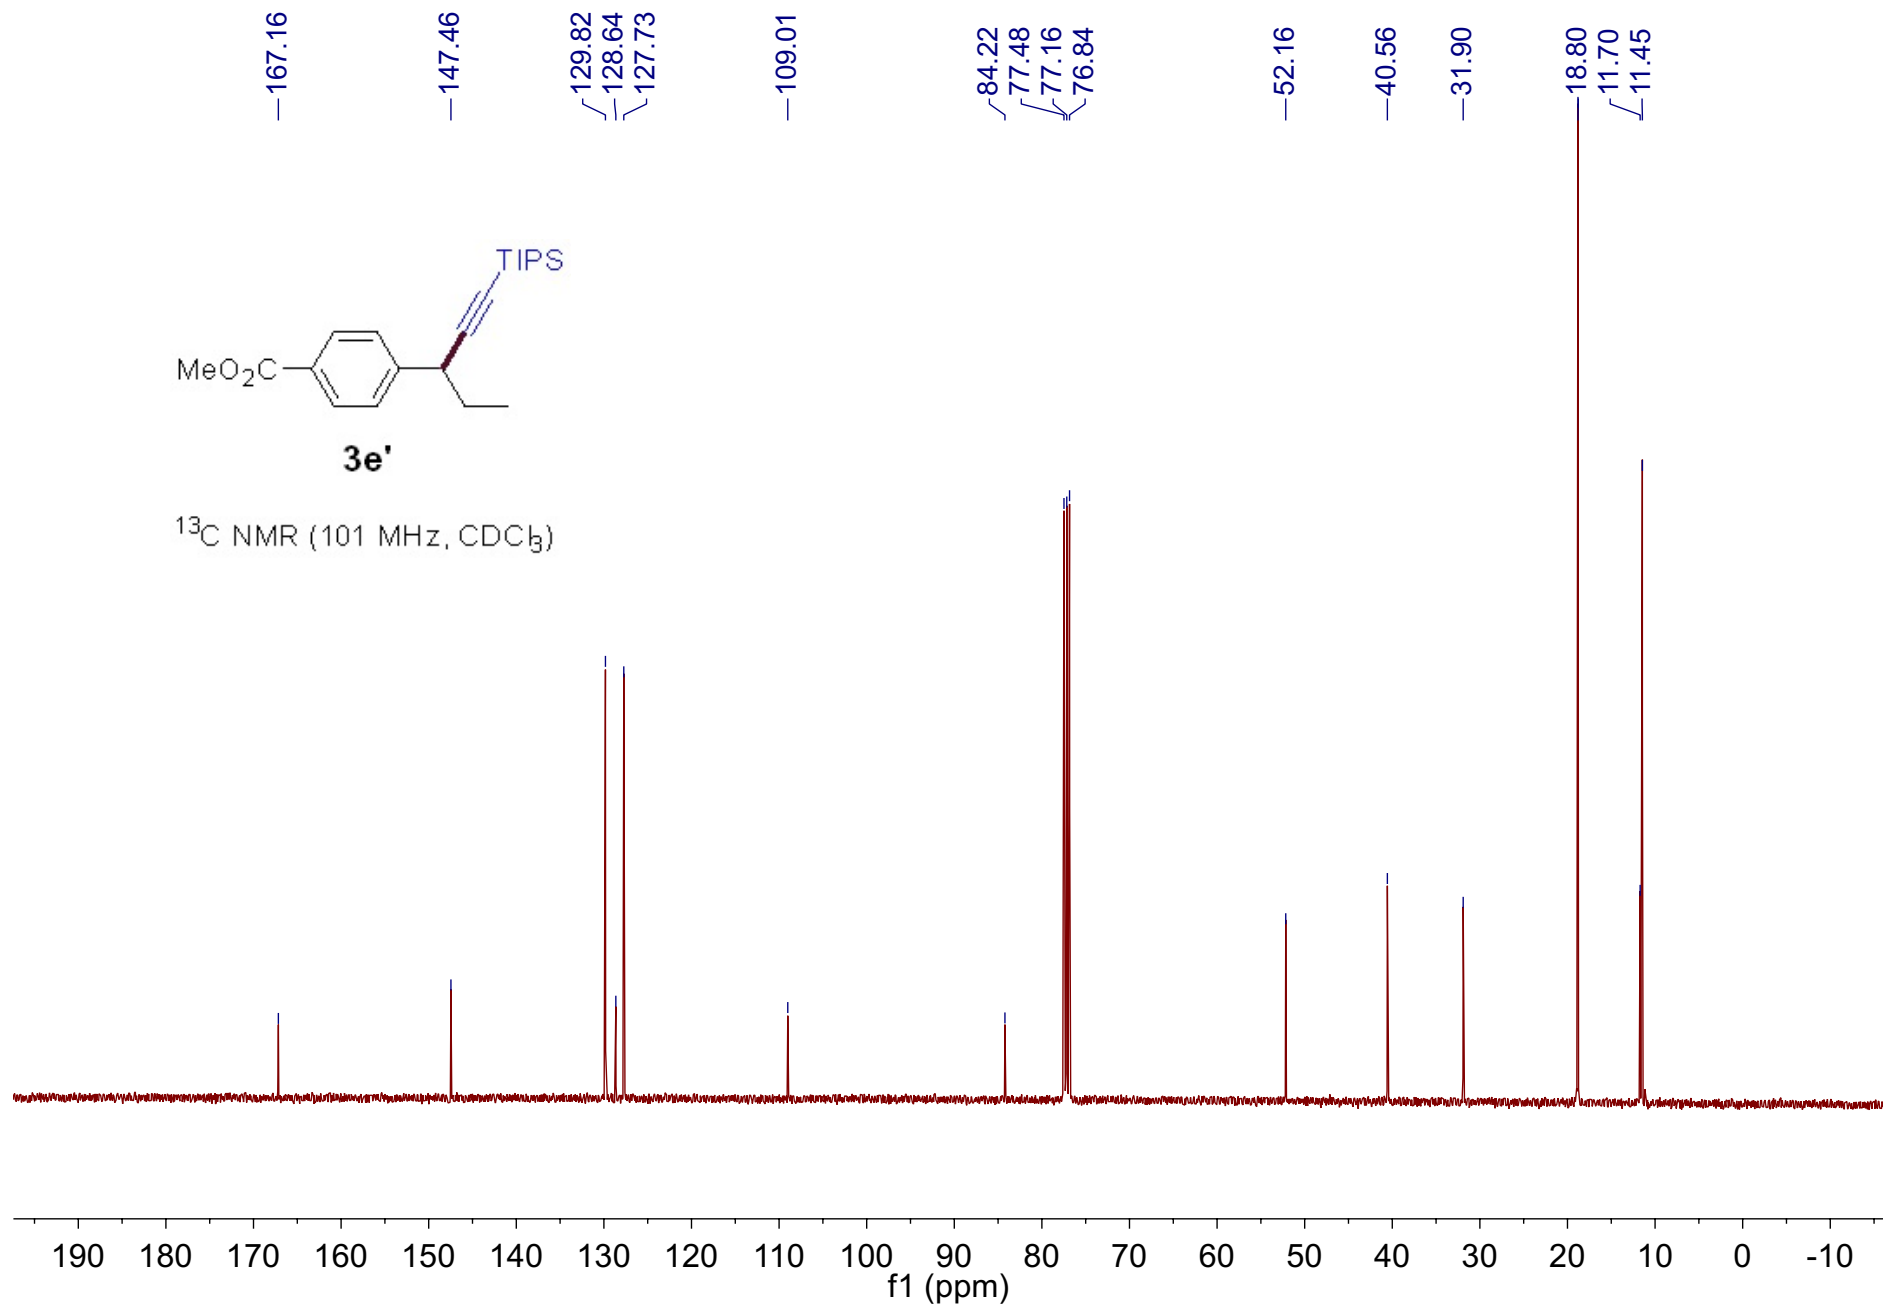

Supplementary Fig. 94. <sup>13</sup>C NMR (101 MHz, CDCl<sub>3</sub>) spectra for compound **3e'**

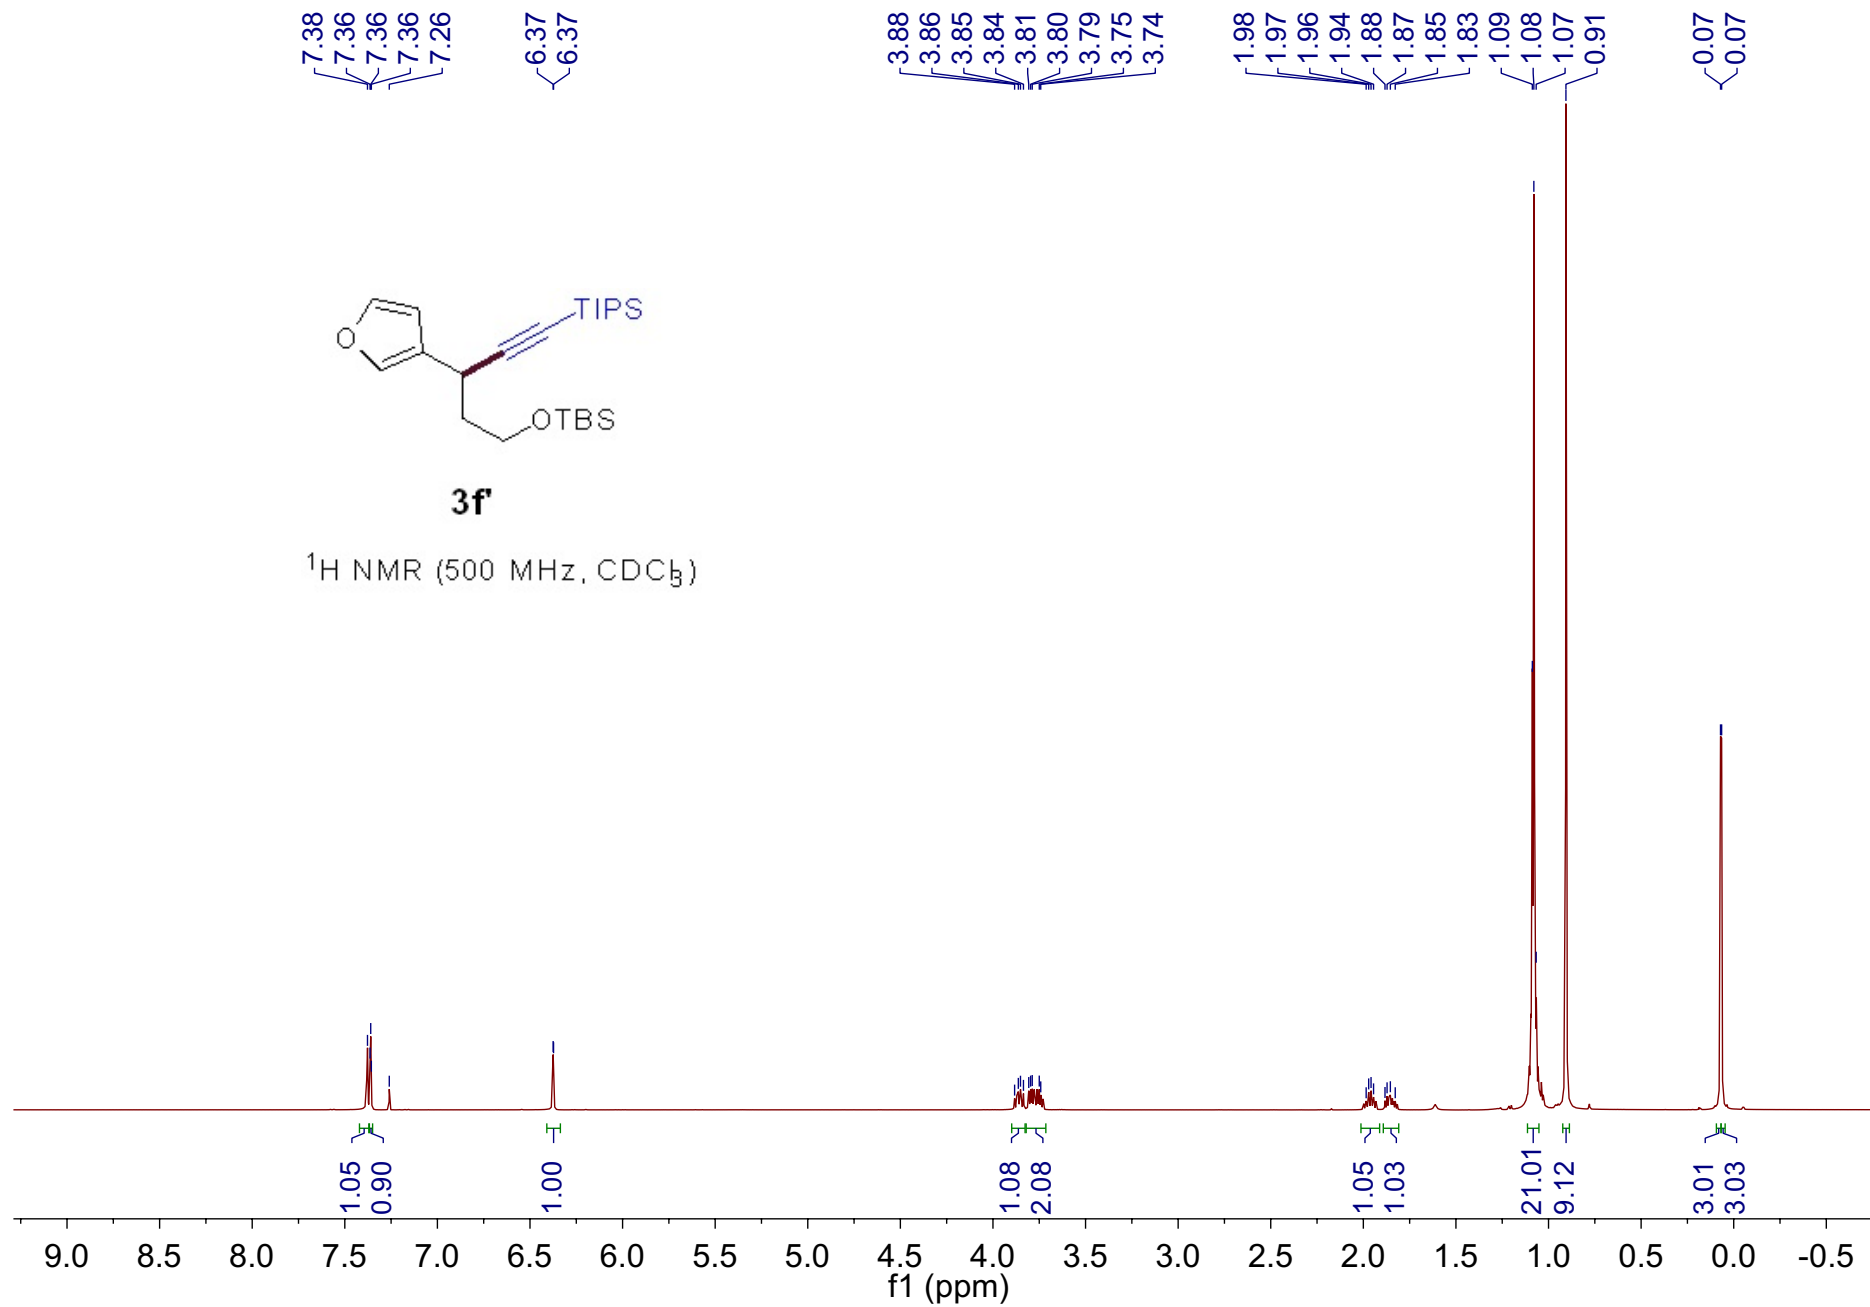

Supplementary Fig. 95. <sup>1</sup>H NMR (500 MHz, CDCl<sub>3</sub>) spectra for compound 3f'

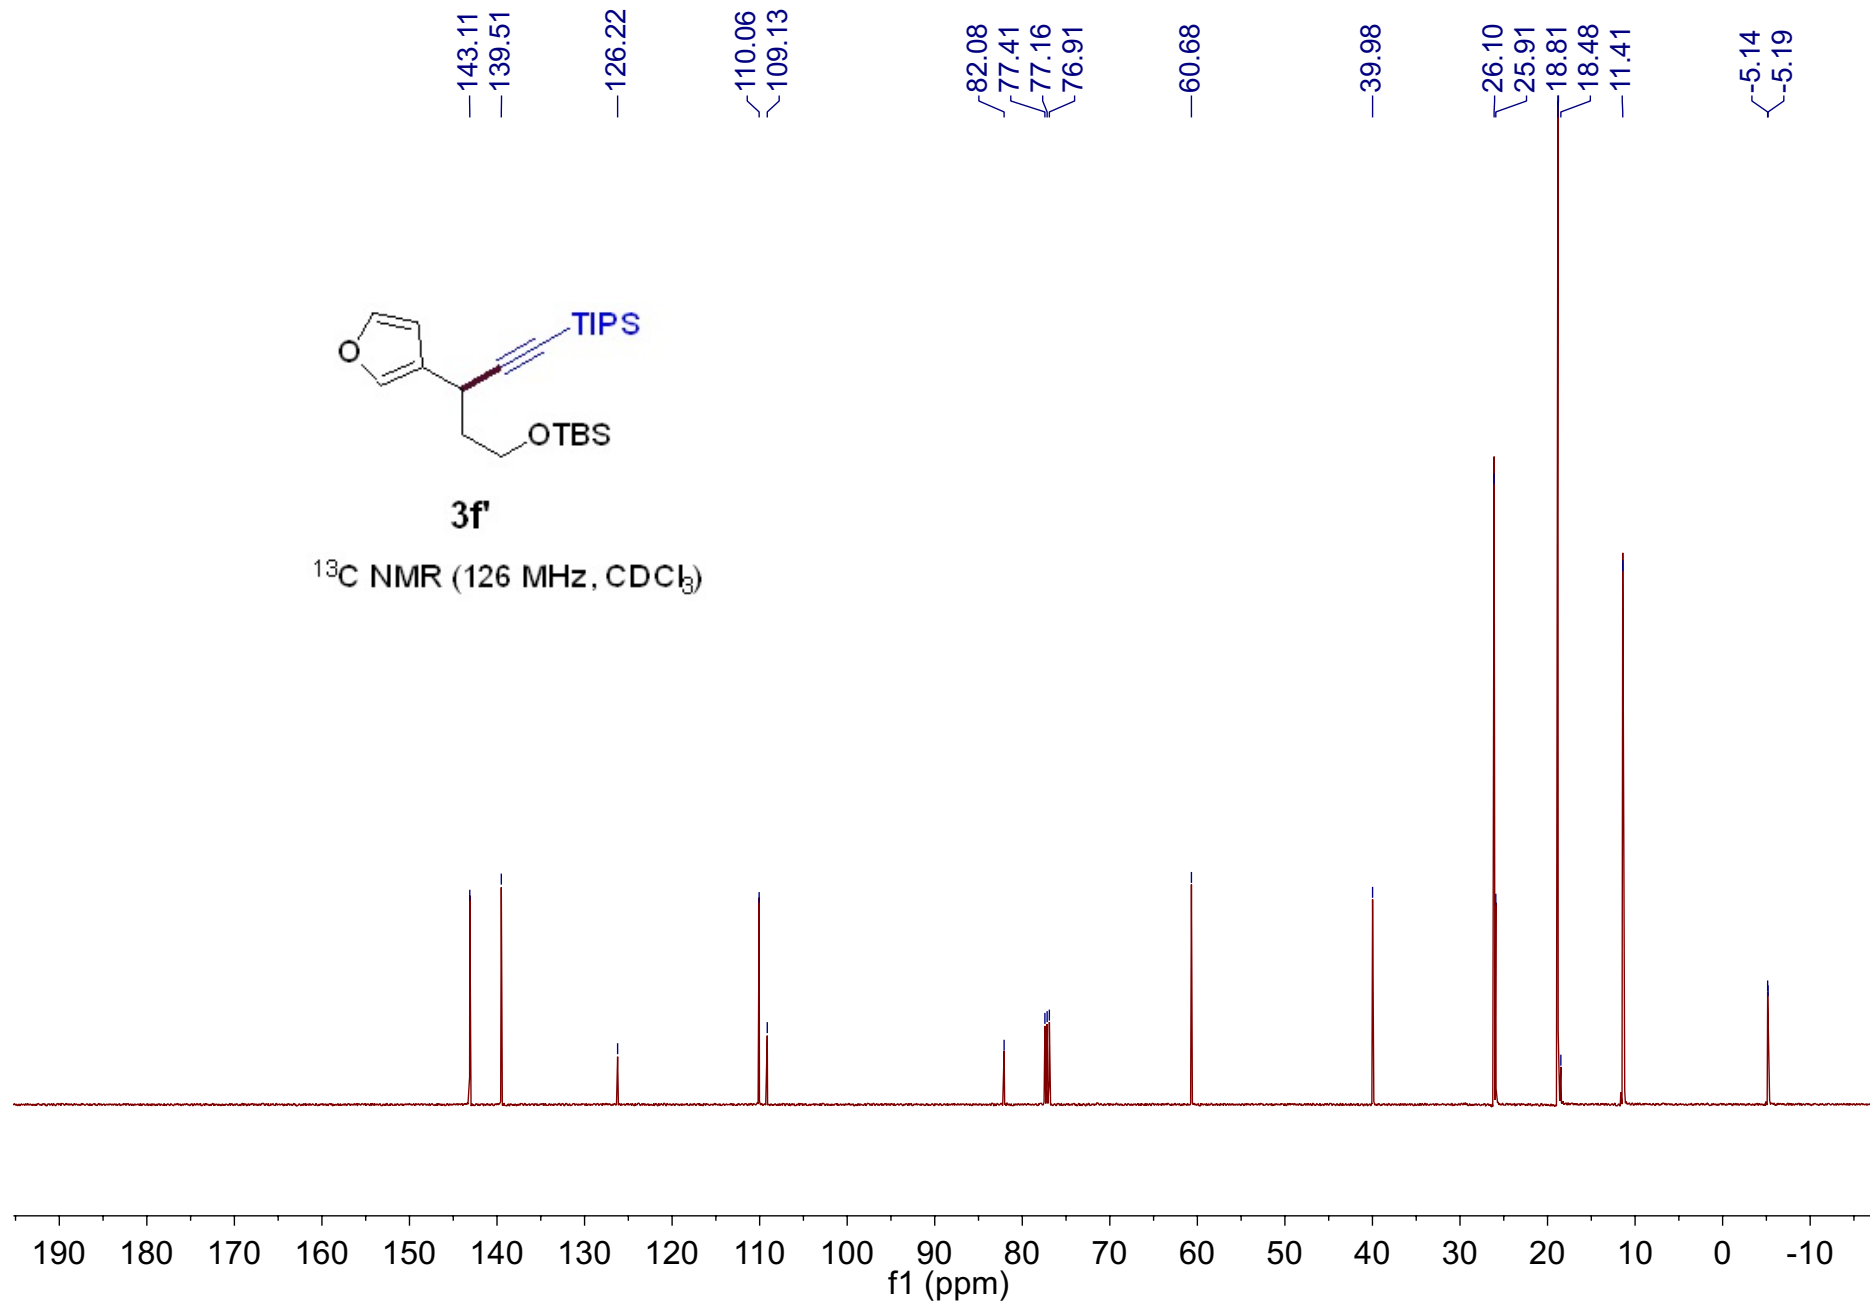

**Supplementary Fig. 96.** <sup>13</sup>C NMR (126 MHz, CDCl<sub>3</sub>) spectra for compound **3f'**

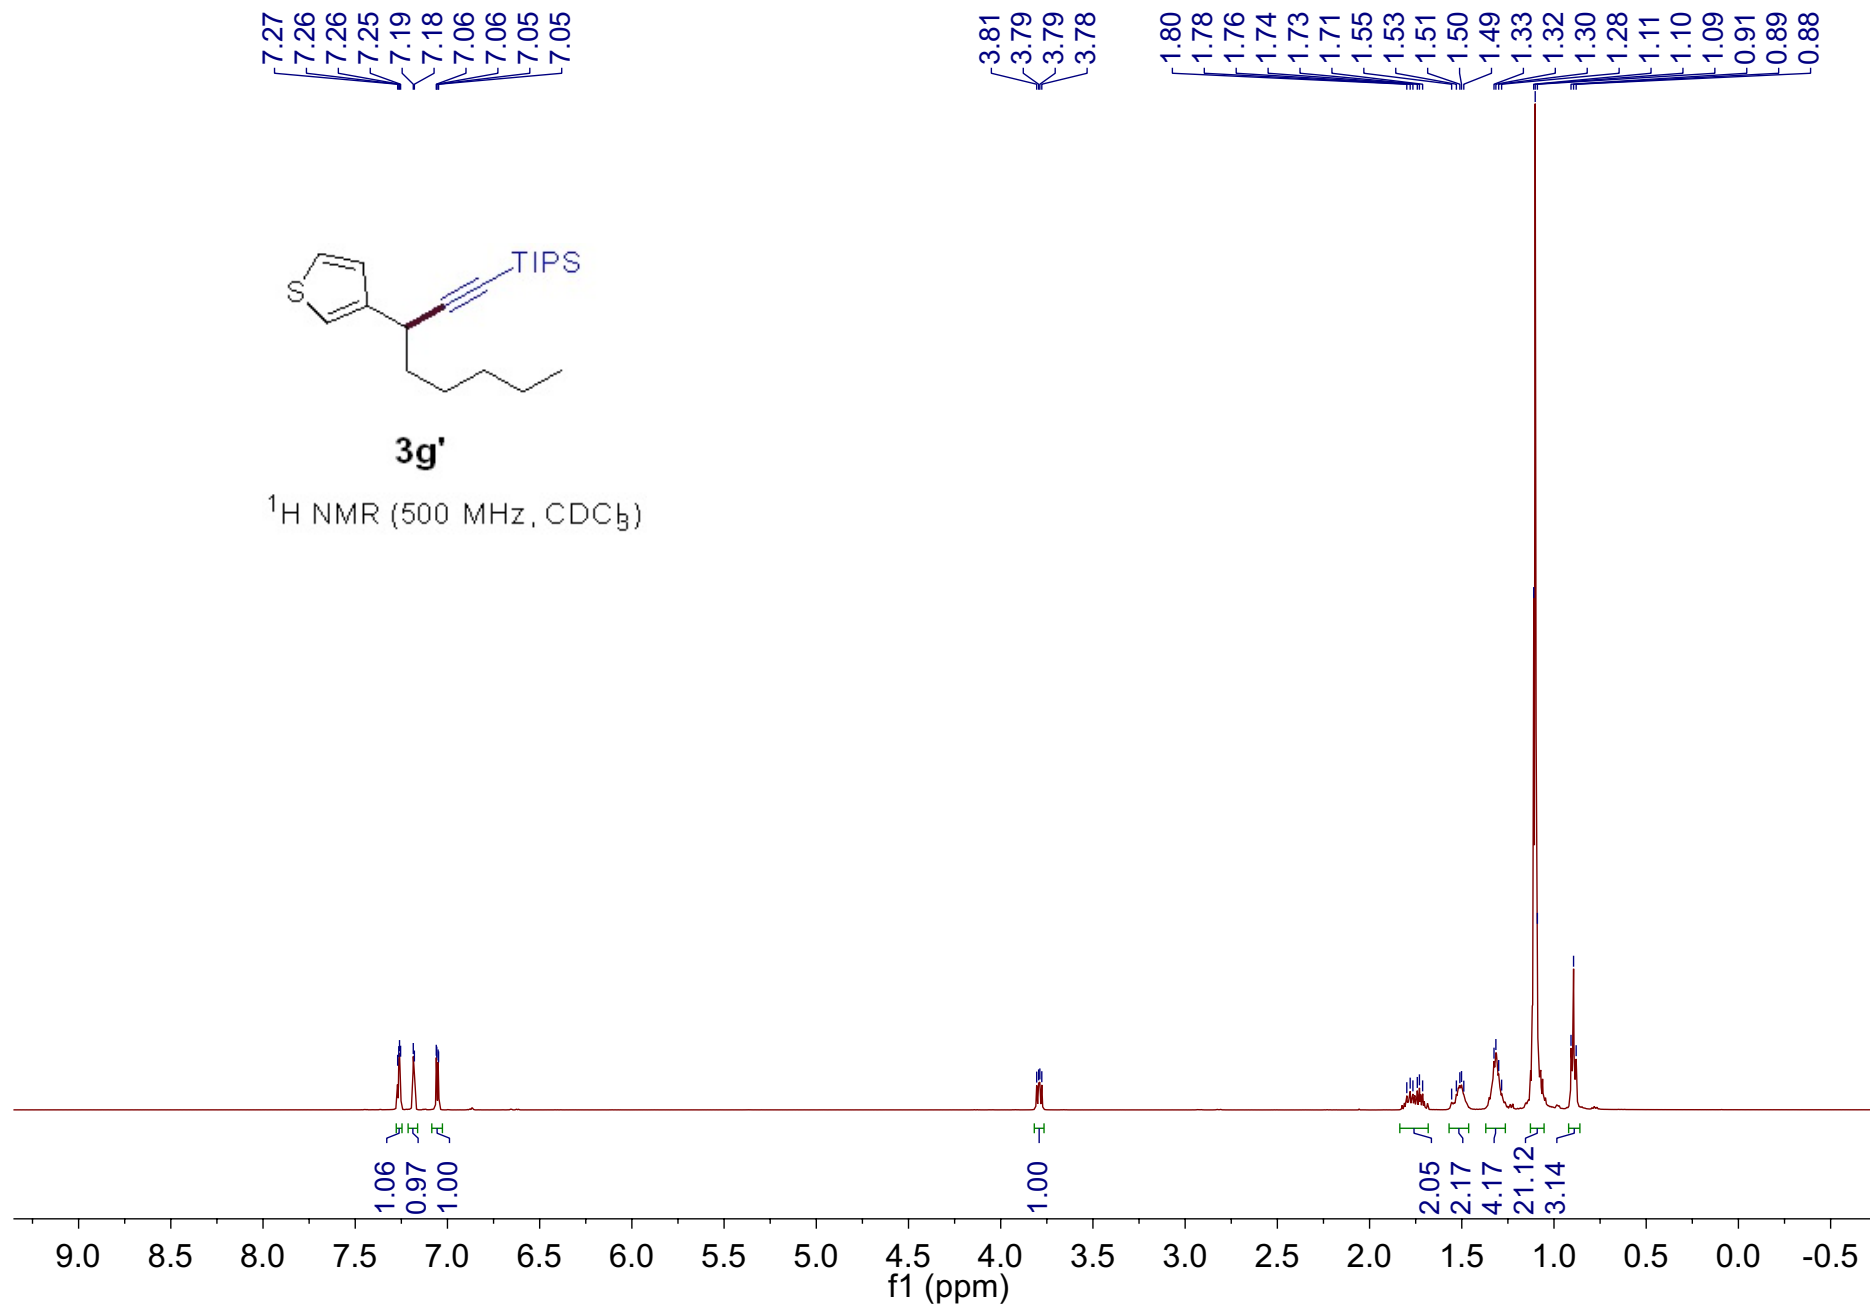

Supplementary Fig. 97. <sup>1</sup>H NMR (500 MHz, CDCl<sub>3</sub>) spectra for compound **3g'**

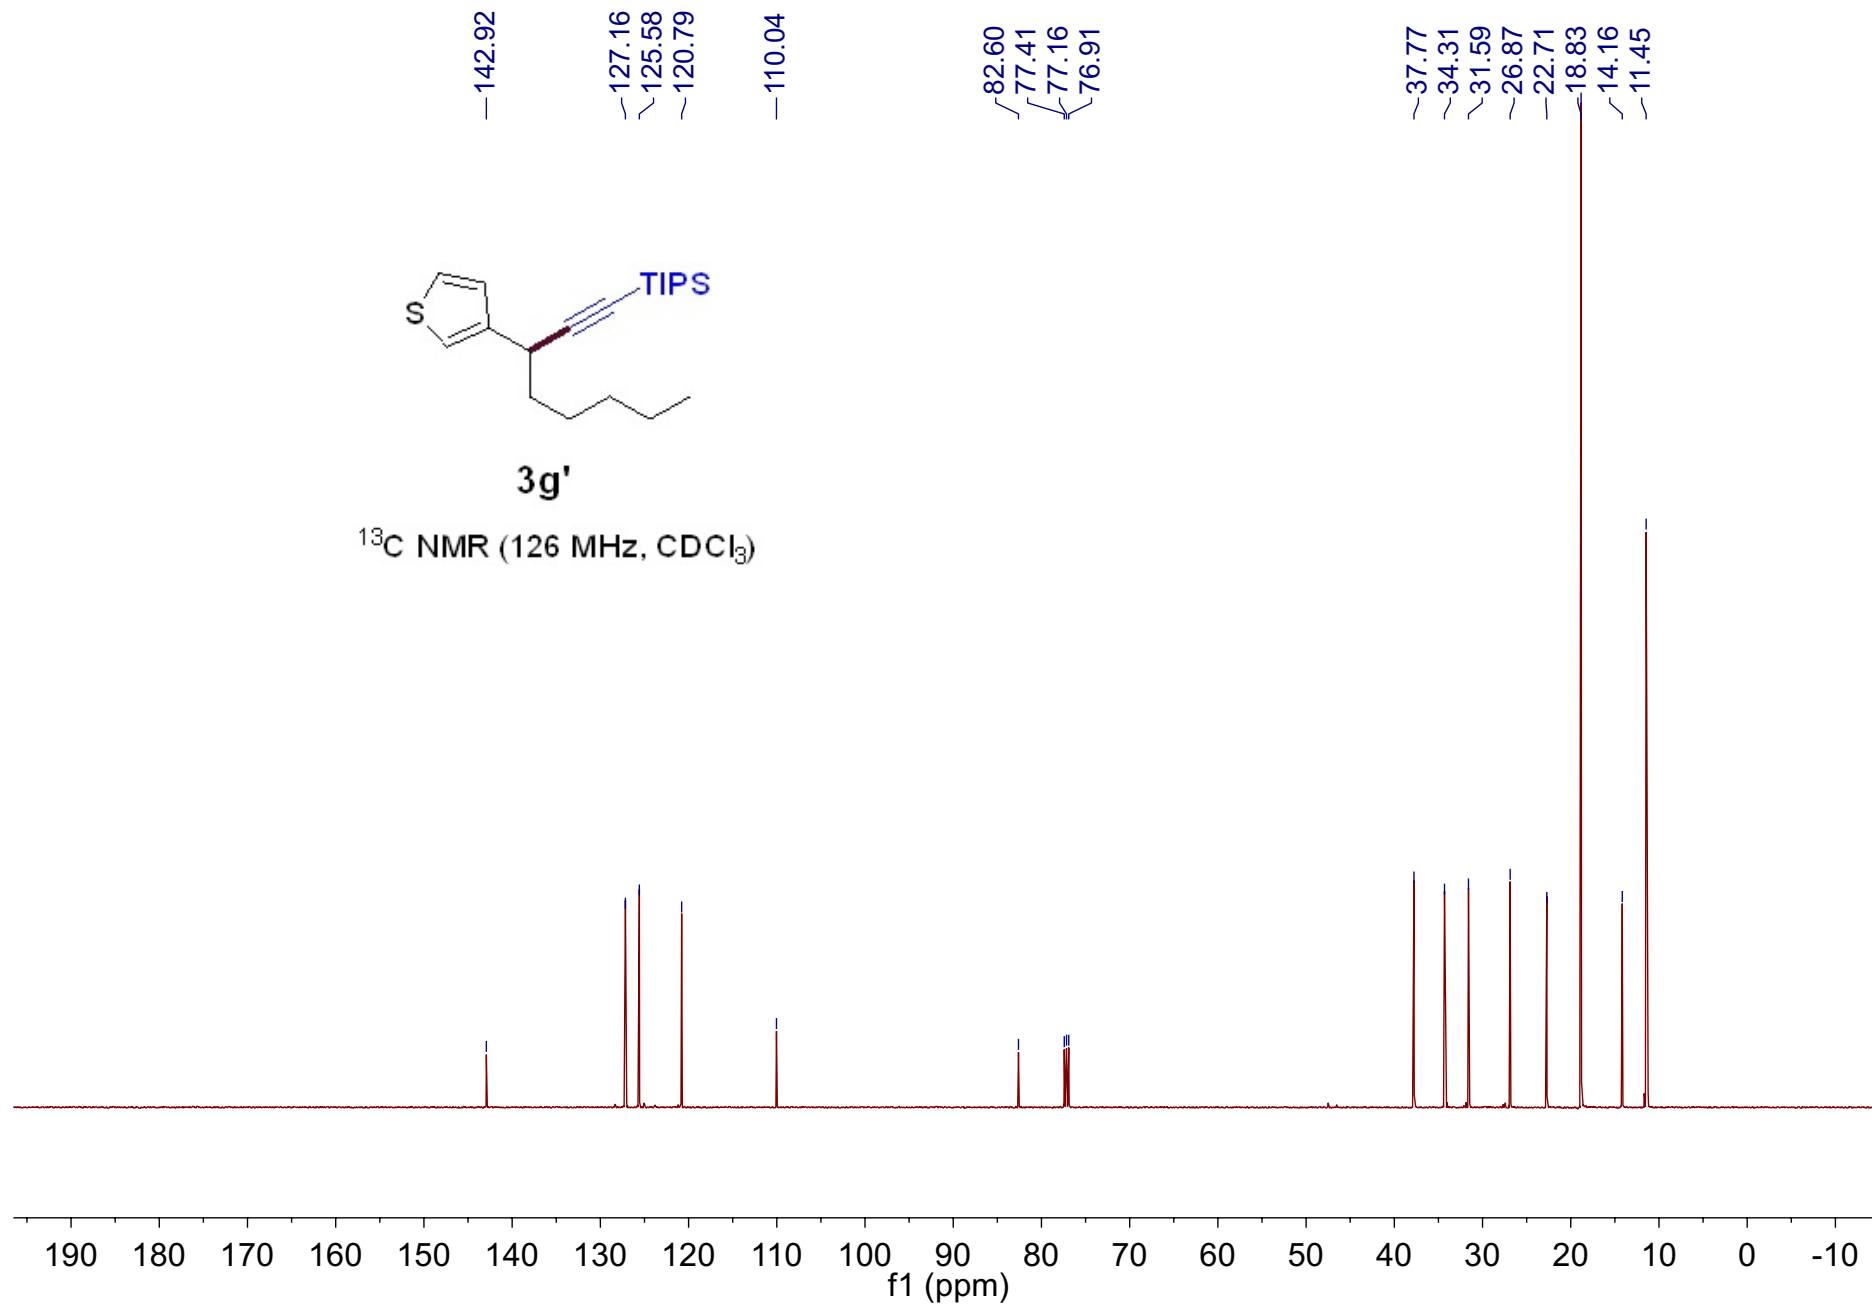

**Supplementary Fig. 98.**  $^{13}\text{C}$  NMR (126 MHz,  $\text{CDCl}_3$ ) spectra for compound **3g'**

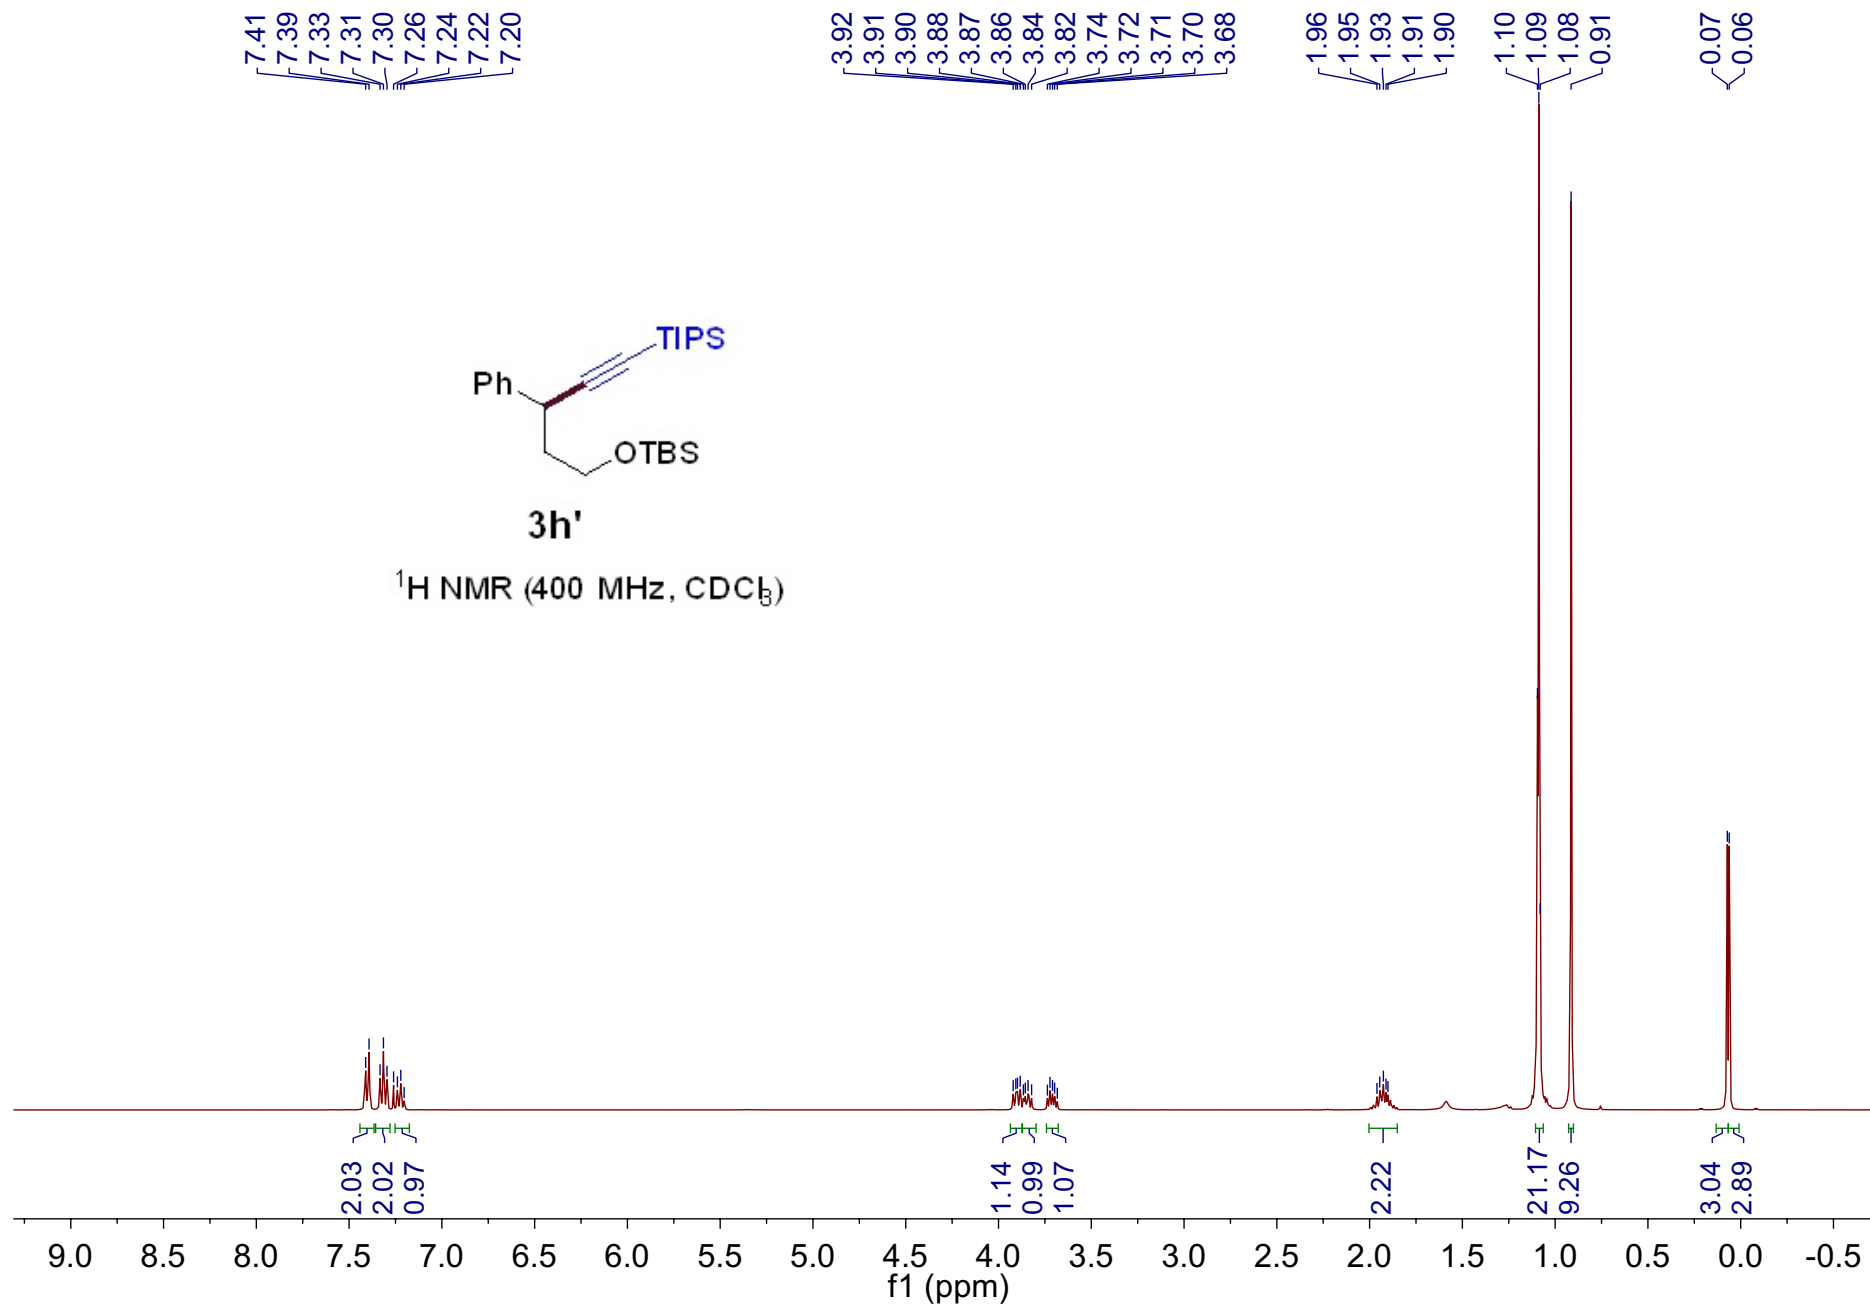

**Supplementary Fig. 99.** <sup>1</sup>H NMR (400 MHz, CDCl<sub>3</sub>) spectra for compound **3h'**

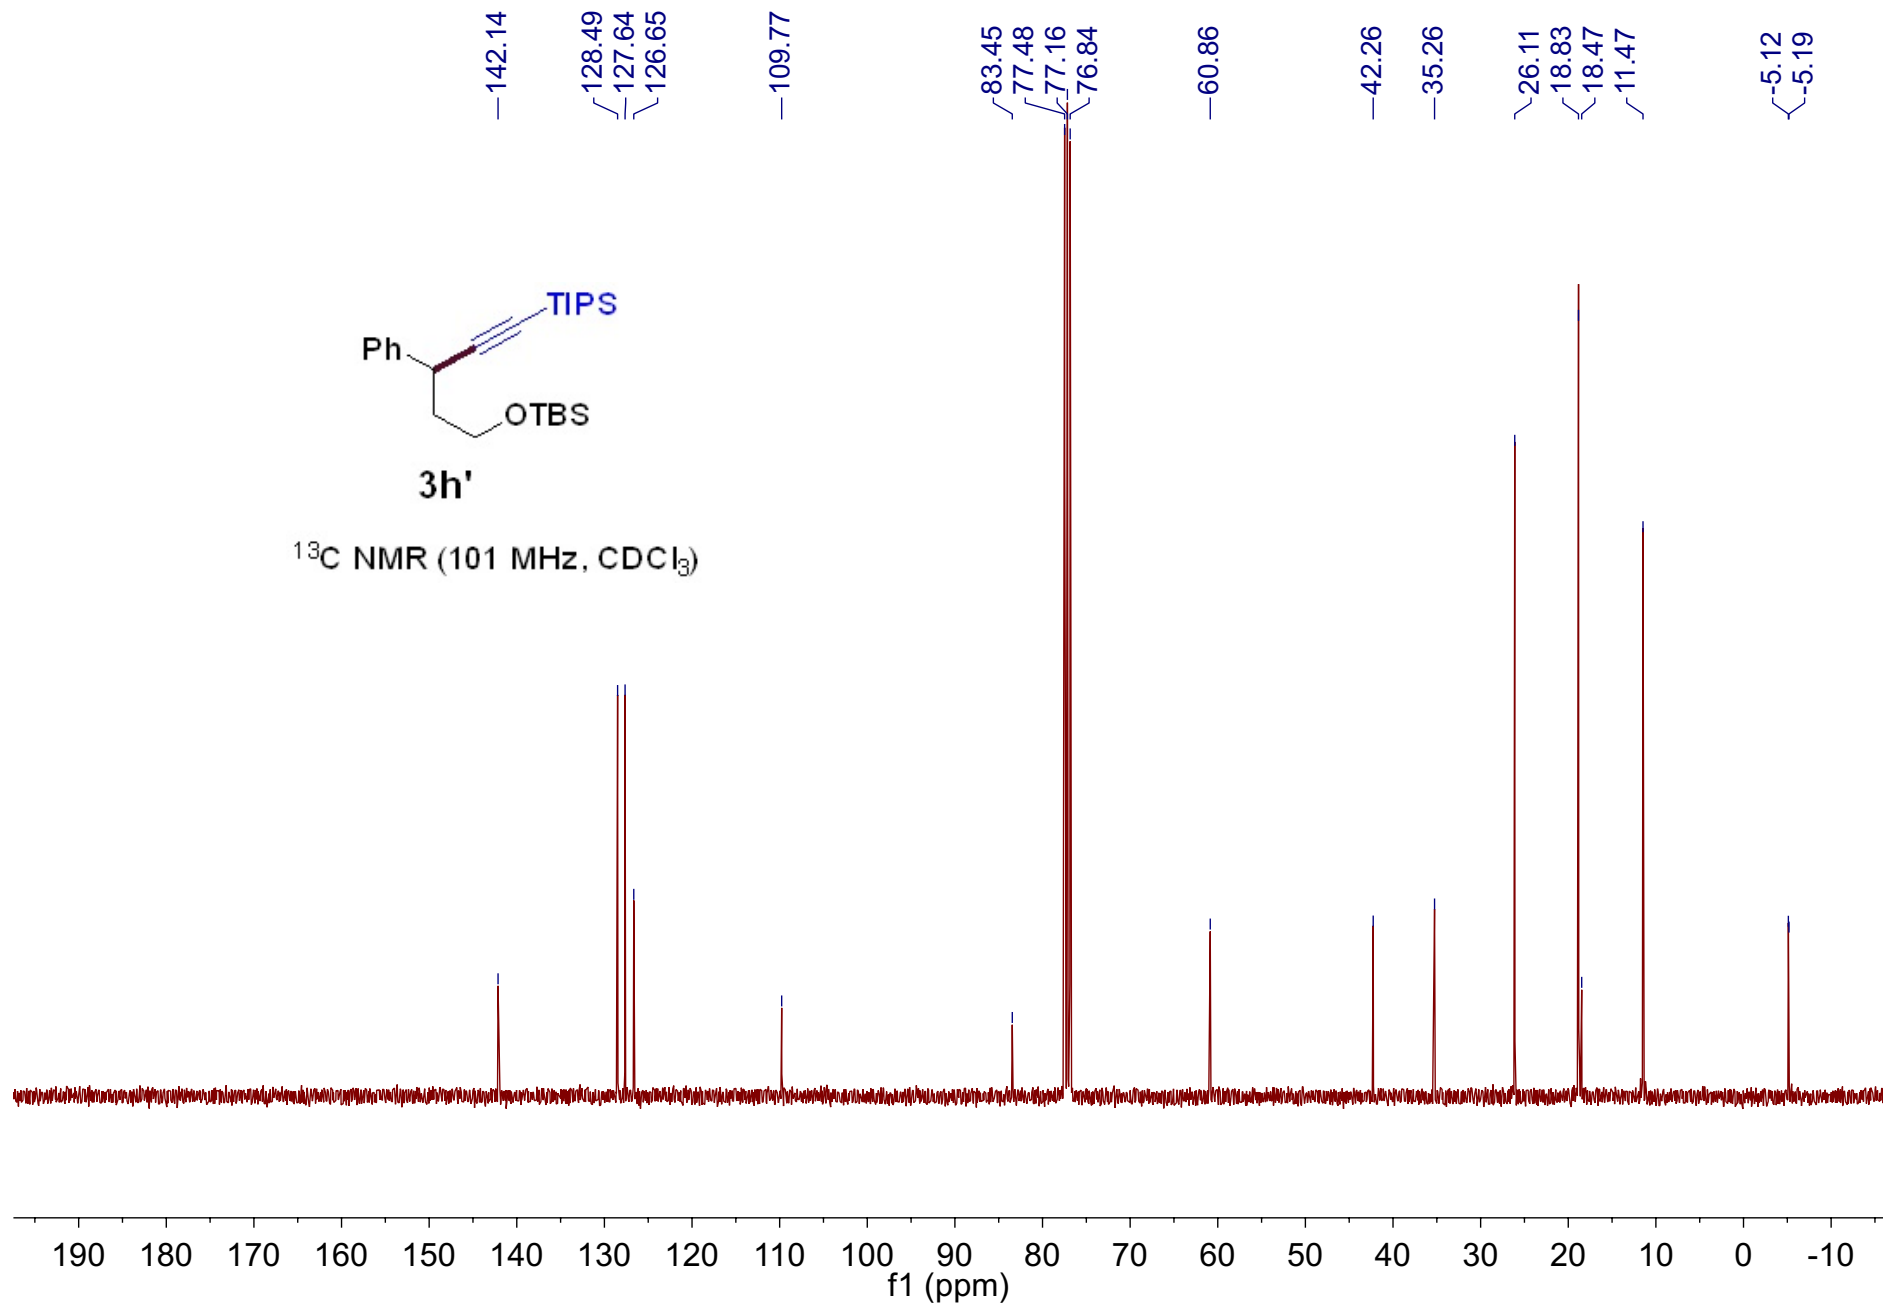

**Supplementary Fig. 100.** <sup>13</sup>C NMR (101 MHz, CDCl<sub>3</sub>) spectra for compound 3h'



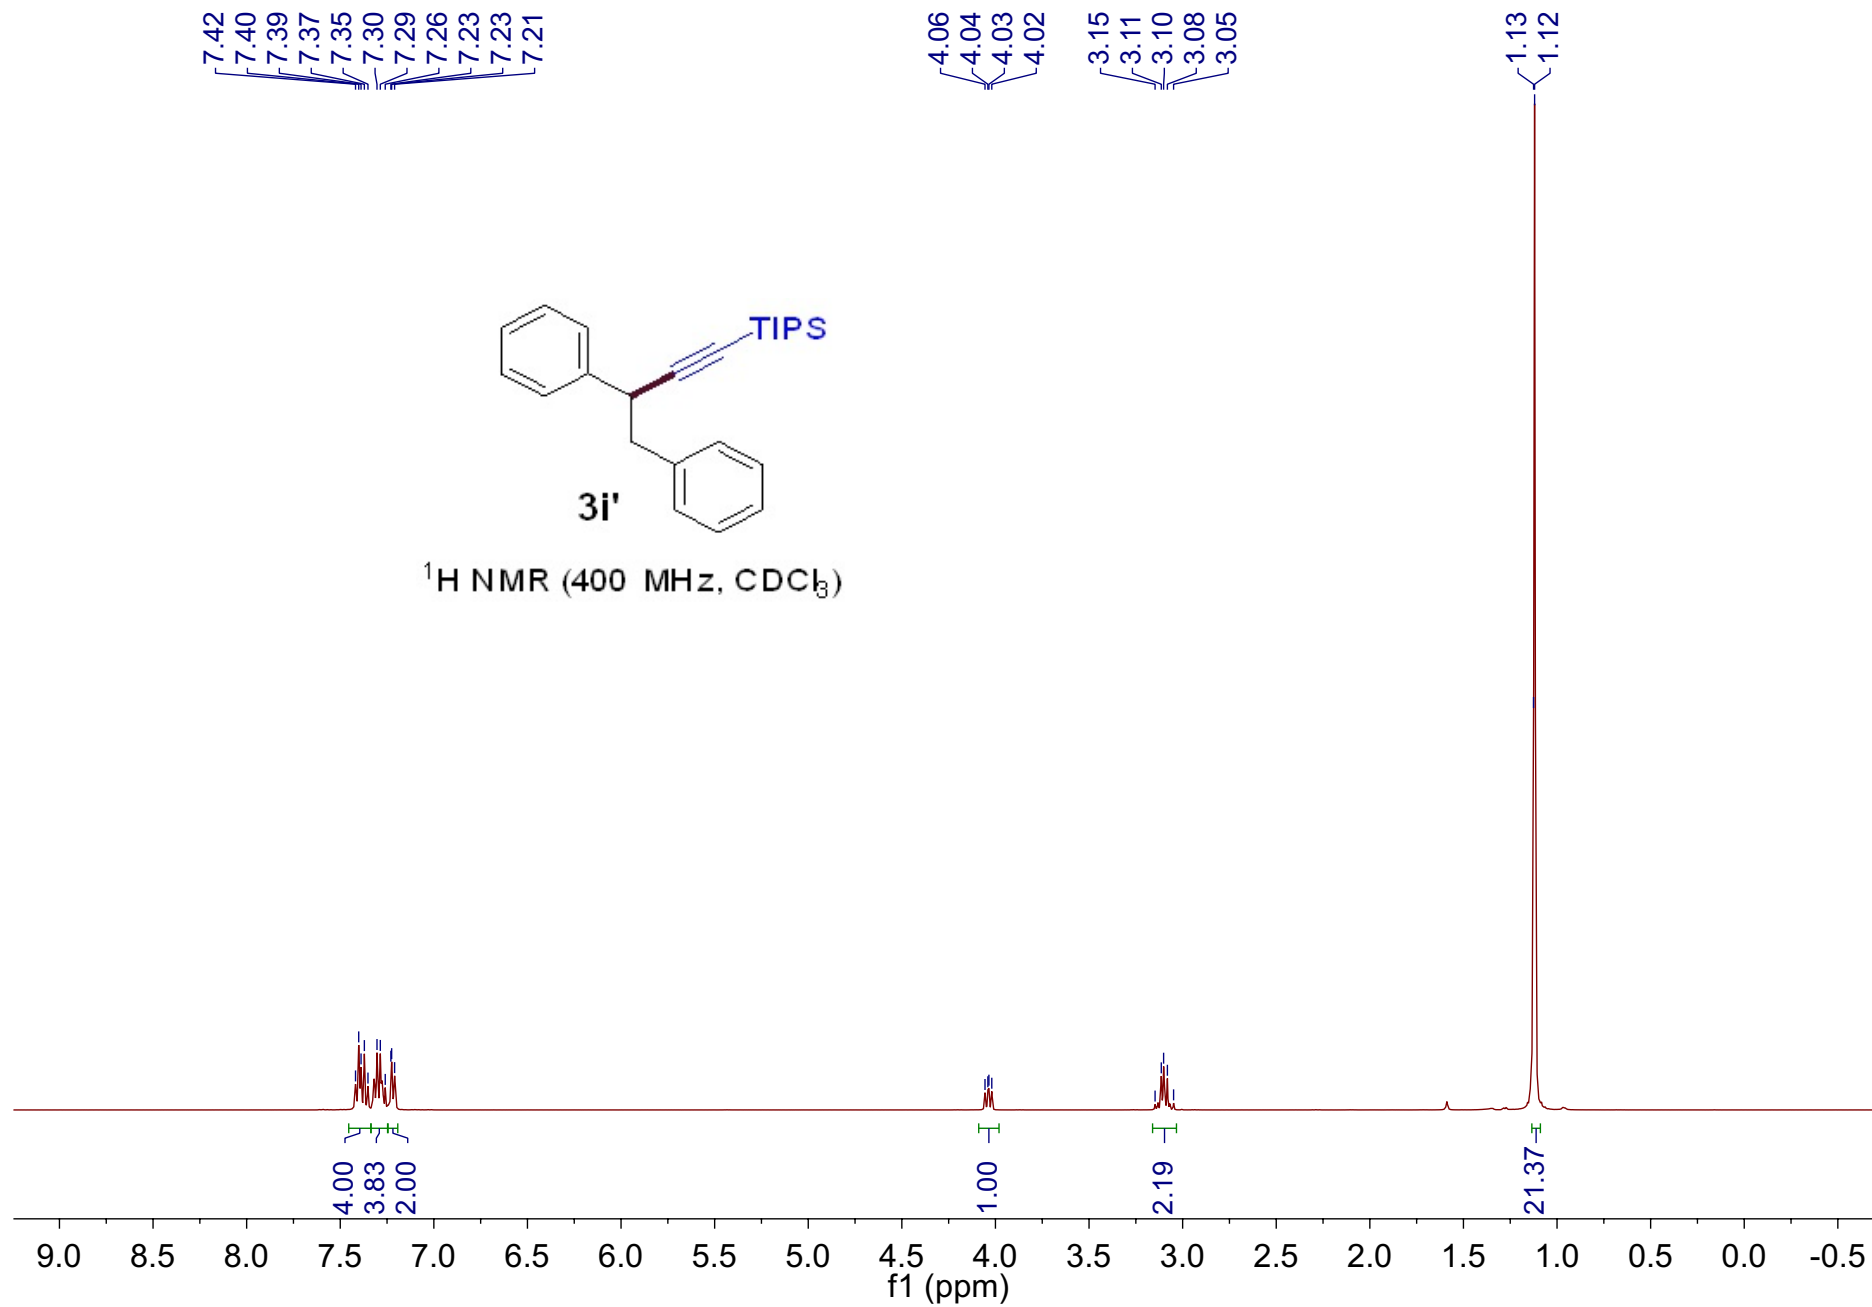

**Supplementary Fig. 101.** <sup>1</sup>H NMR (400 MHz, CDCl<sub>3</sub>) spectra for compound **3i'**

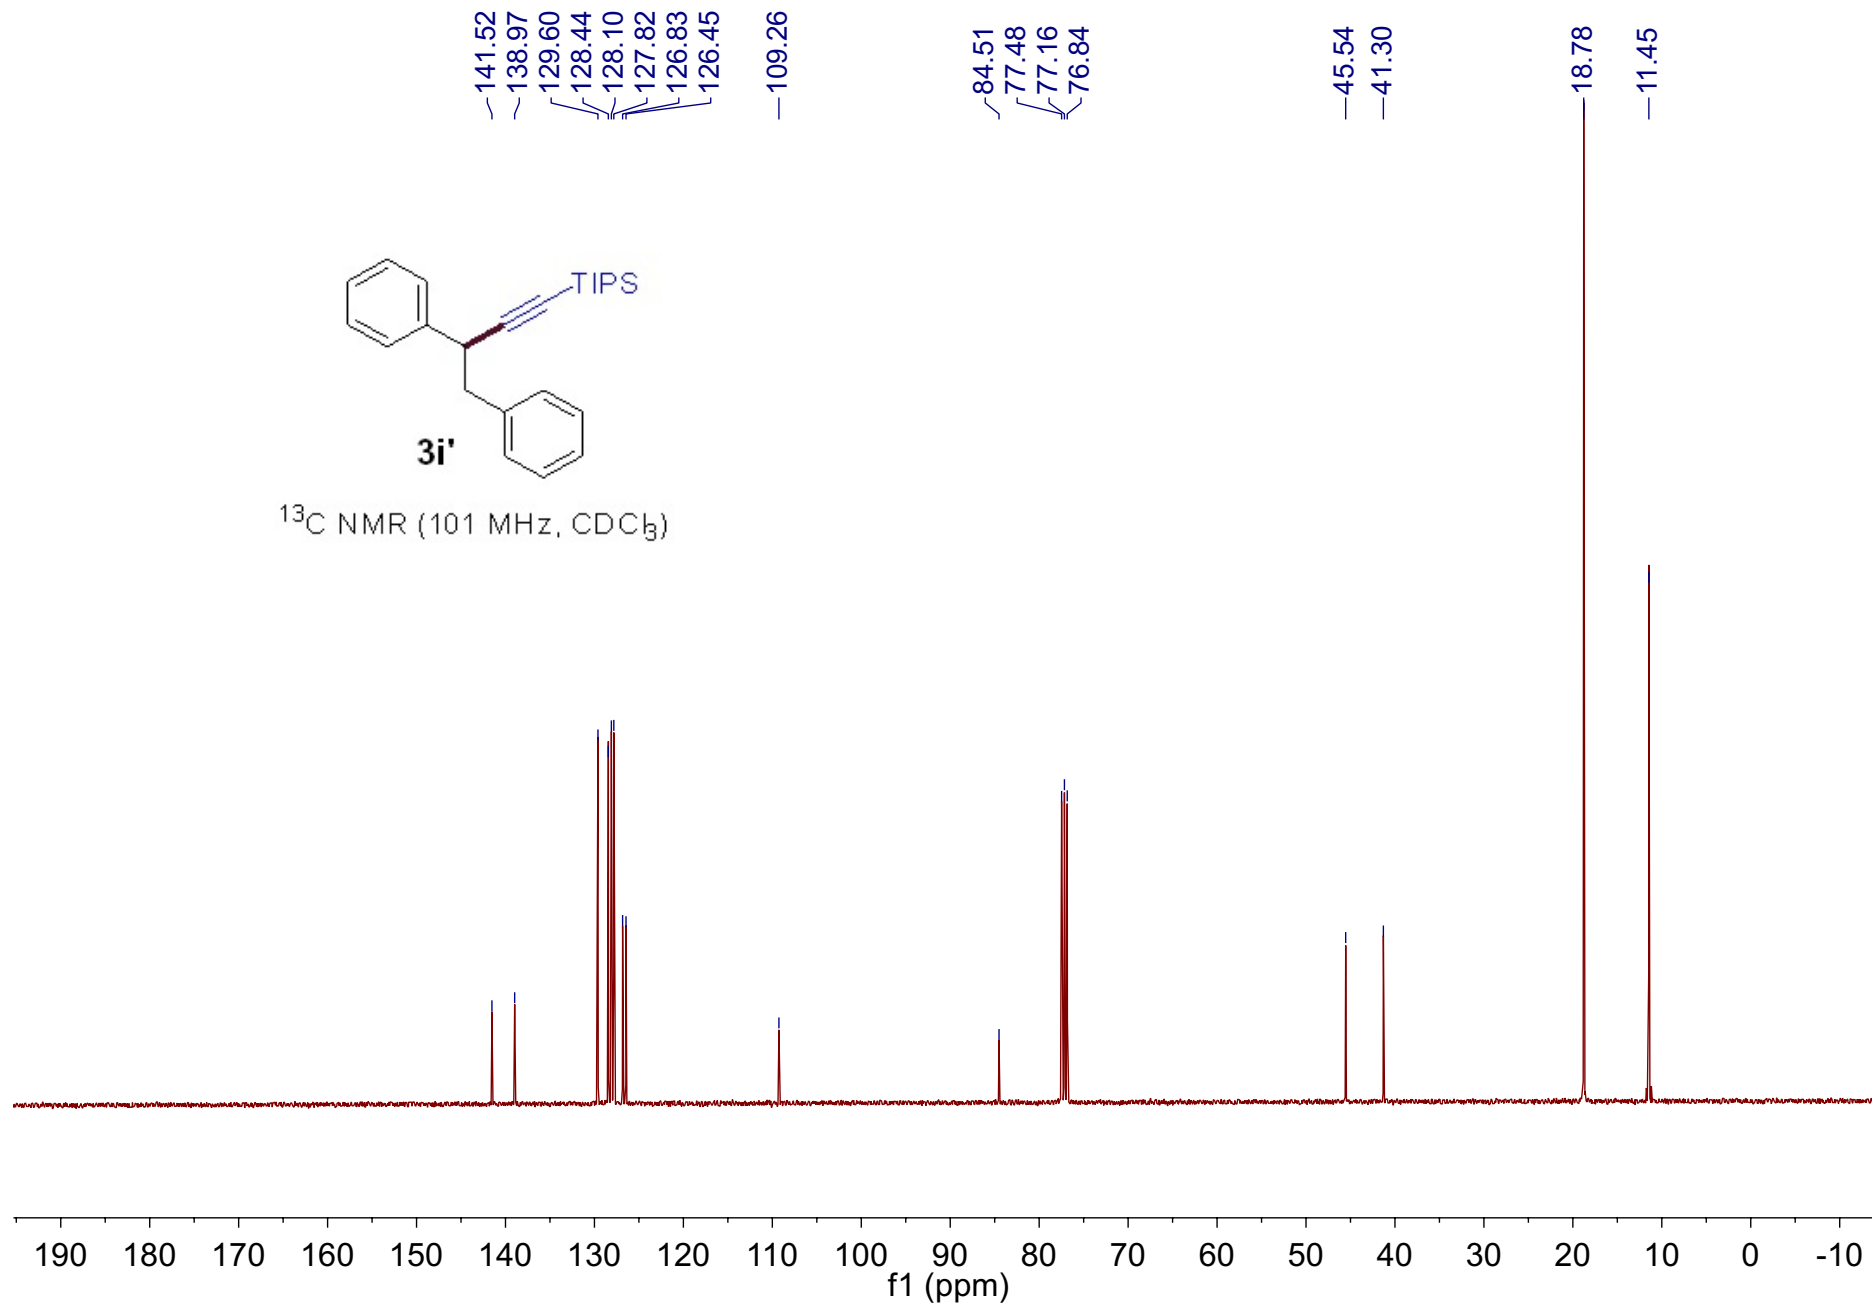

**Supplementary Fig. 102.**  $^{13}\text{C}$  NMR (101 MHz,  $\text{CDCl}_3$ ) spectra for compound **3i'**

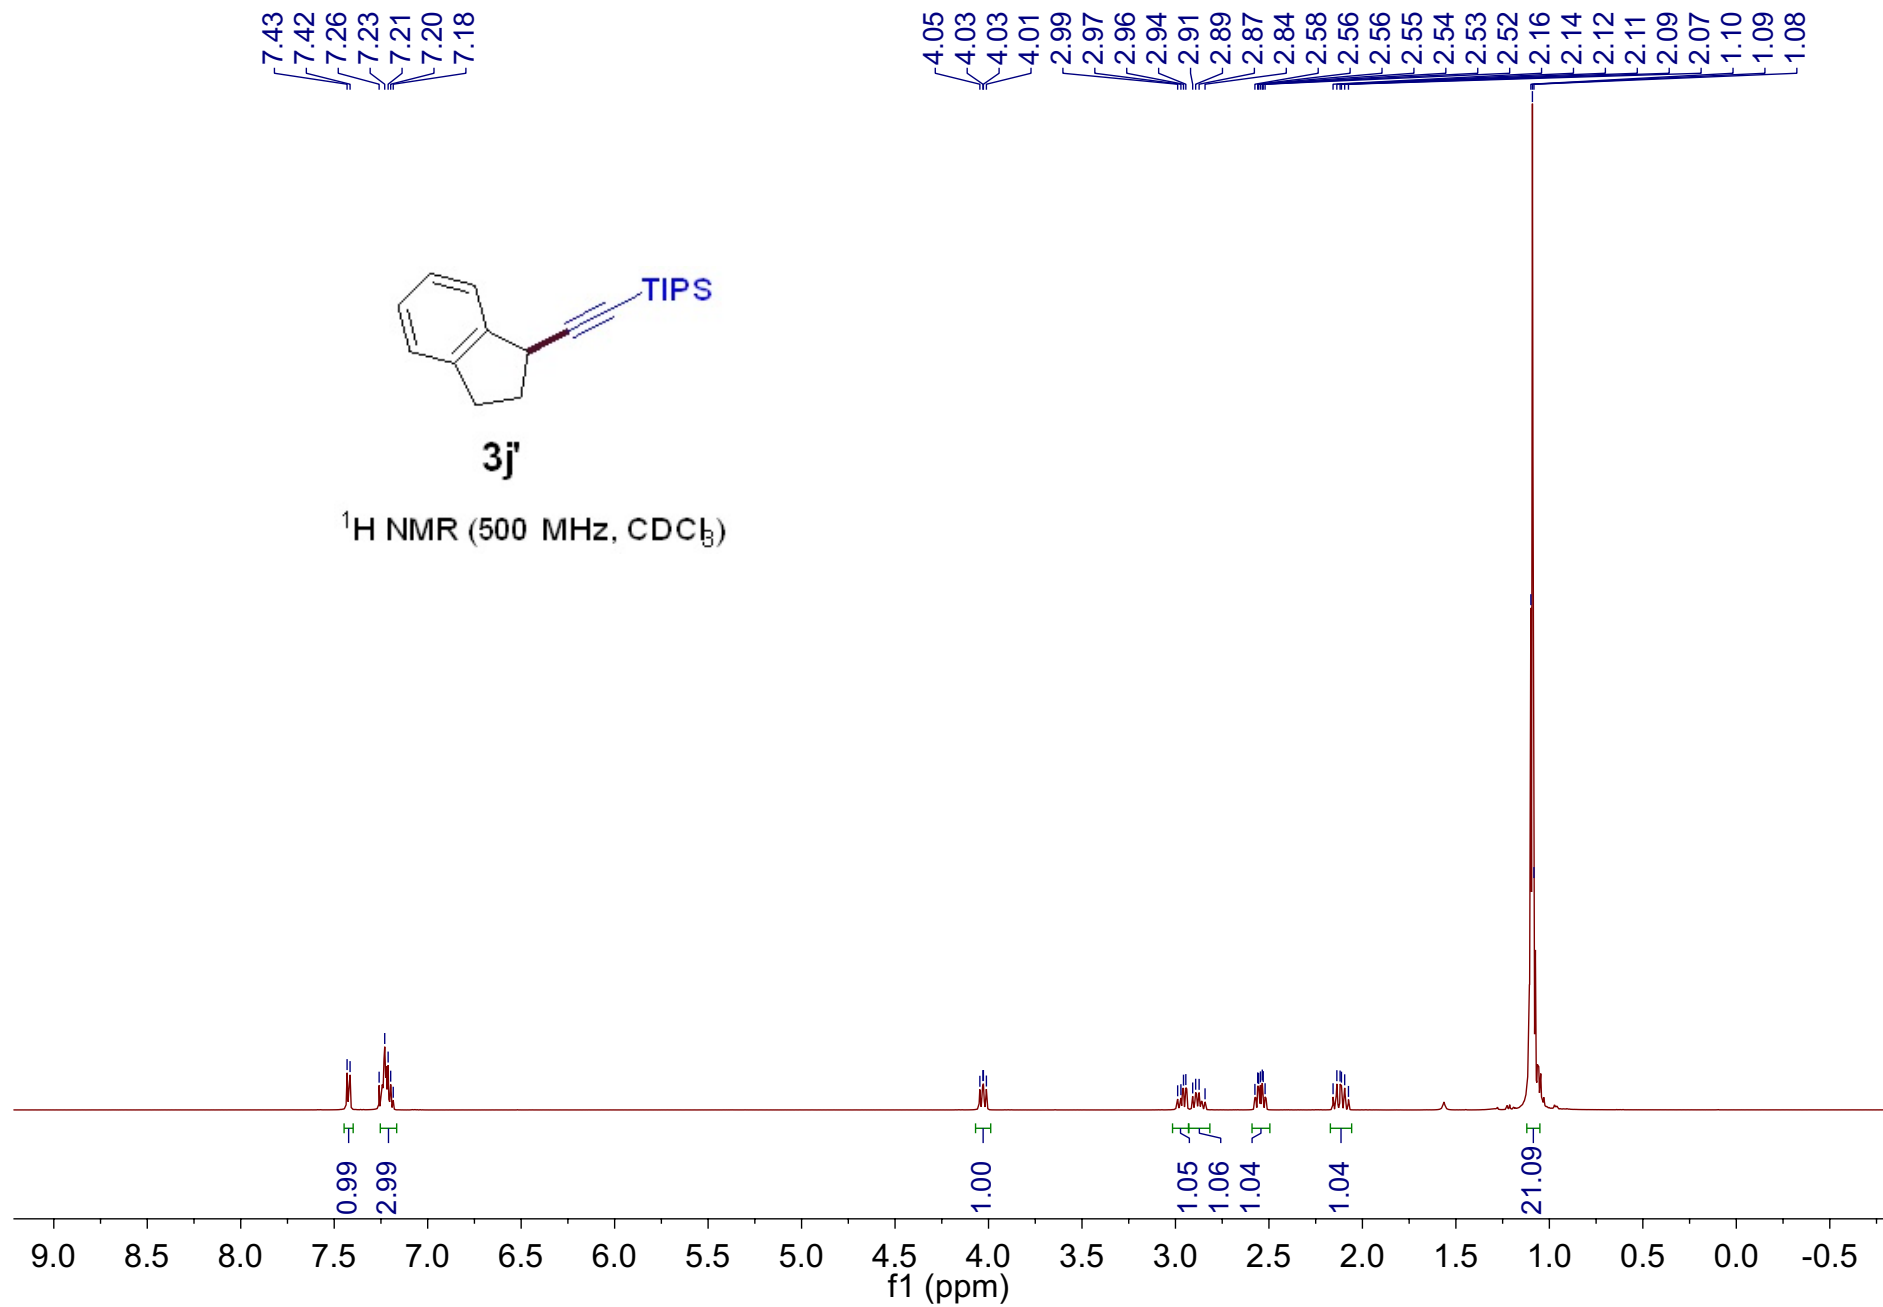

Supplementary Fig. 103. <sup>1</sup>H NMR (500 MHz, CDCl<sub>3</sub>) spectra for compound **3j'**

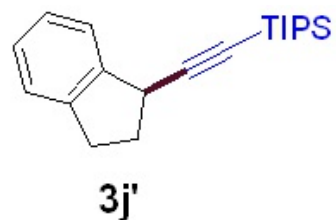

$^{13}\text{C}$  NMR (126 MHz,  $\text{CDCl}_3$ )

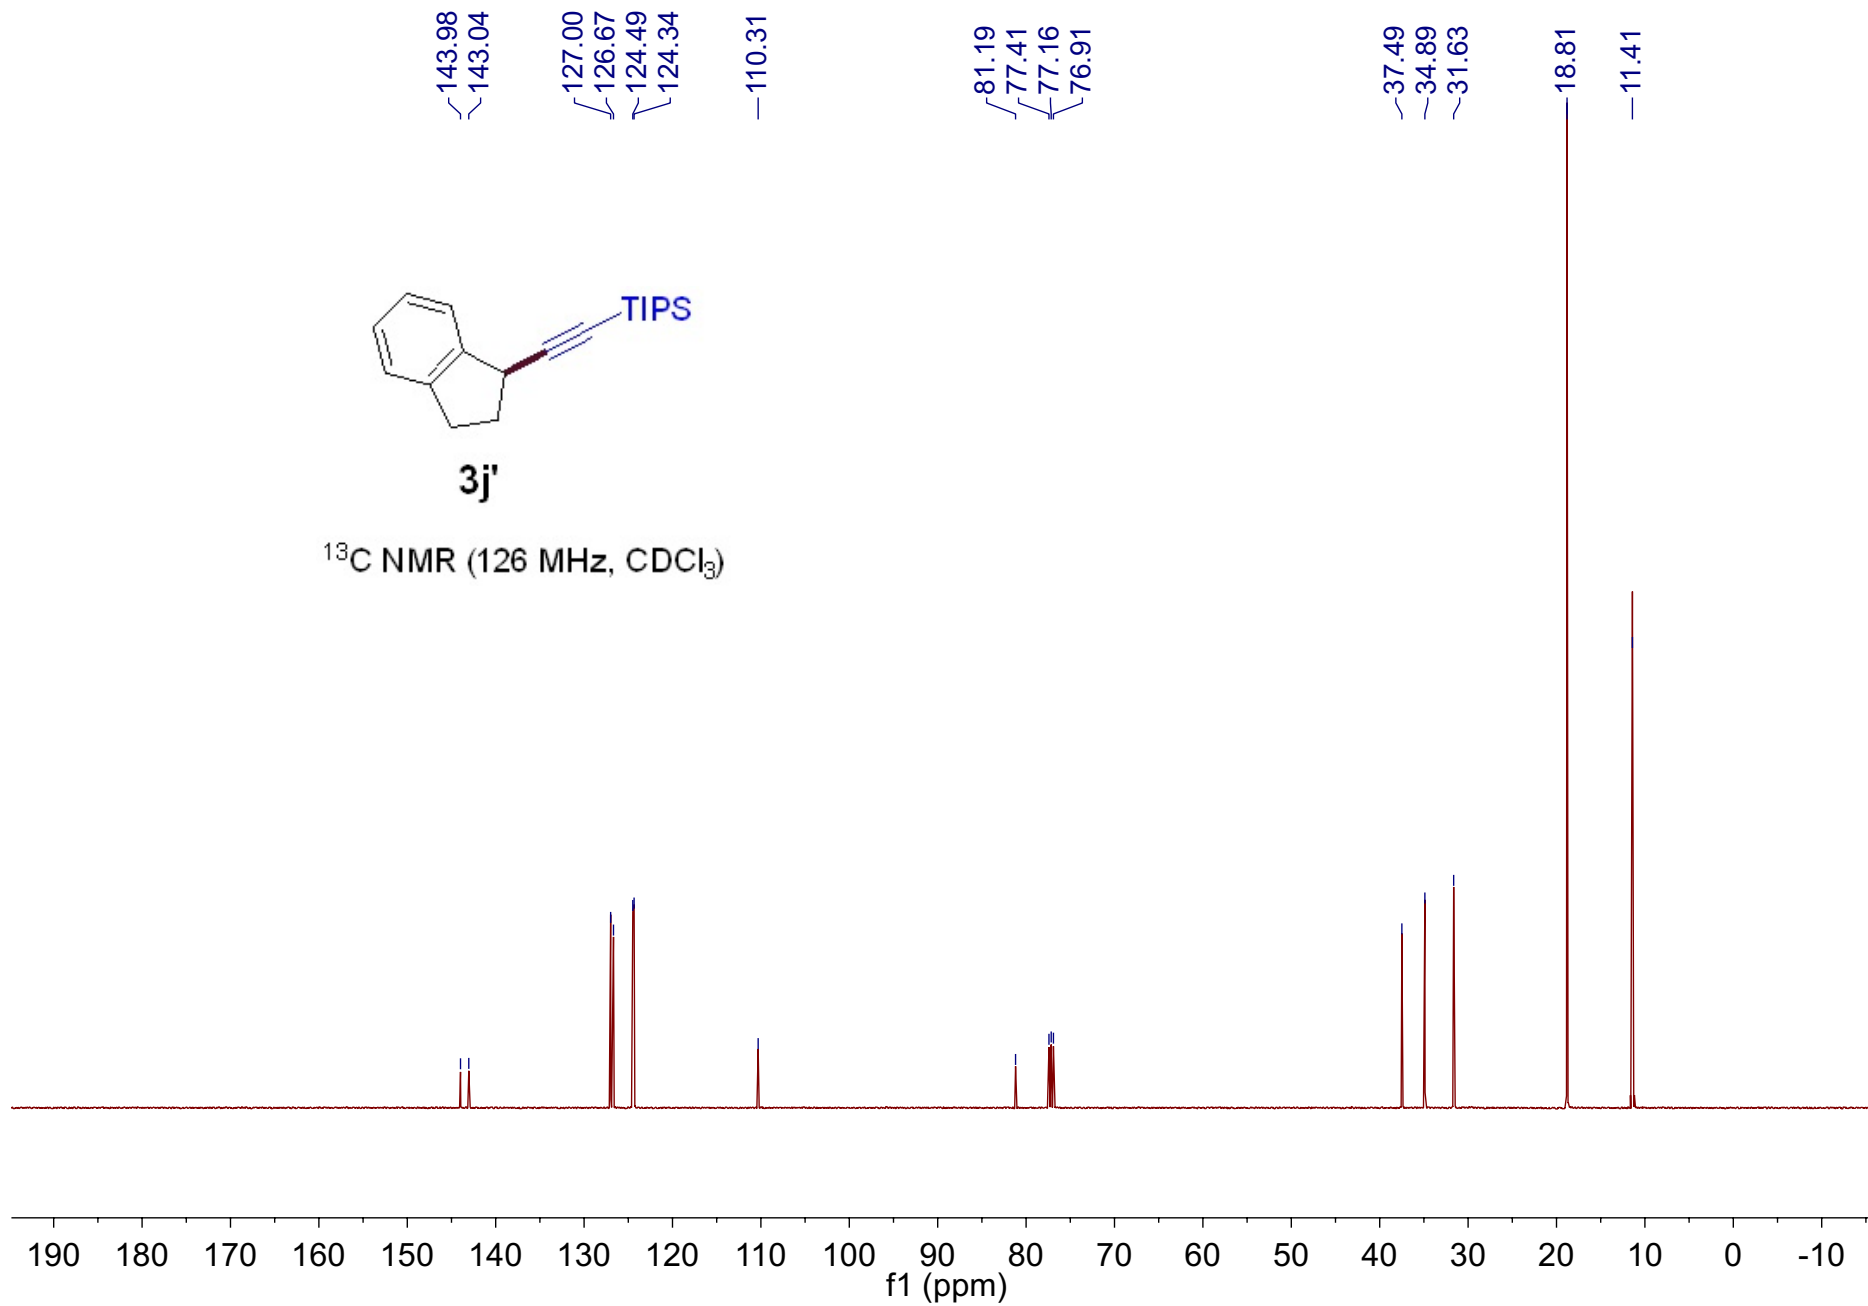

**Supplementary Fig. 104.**  $^{13}\text{C}$  NMR (126 MHz,  $\text{CDCl}_3$ ) spectra for compound **3j'**

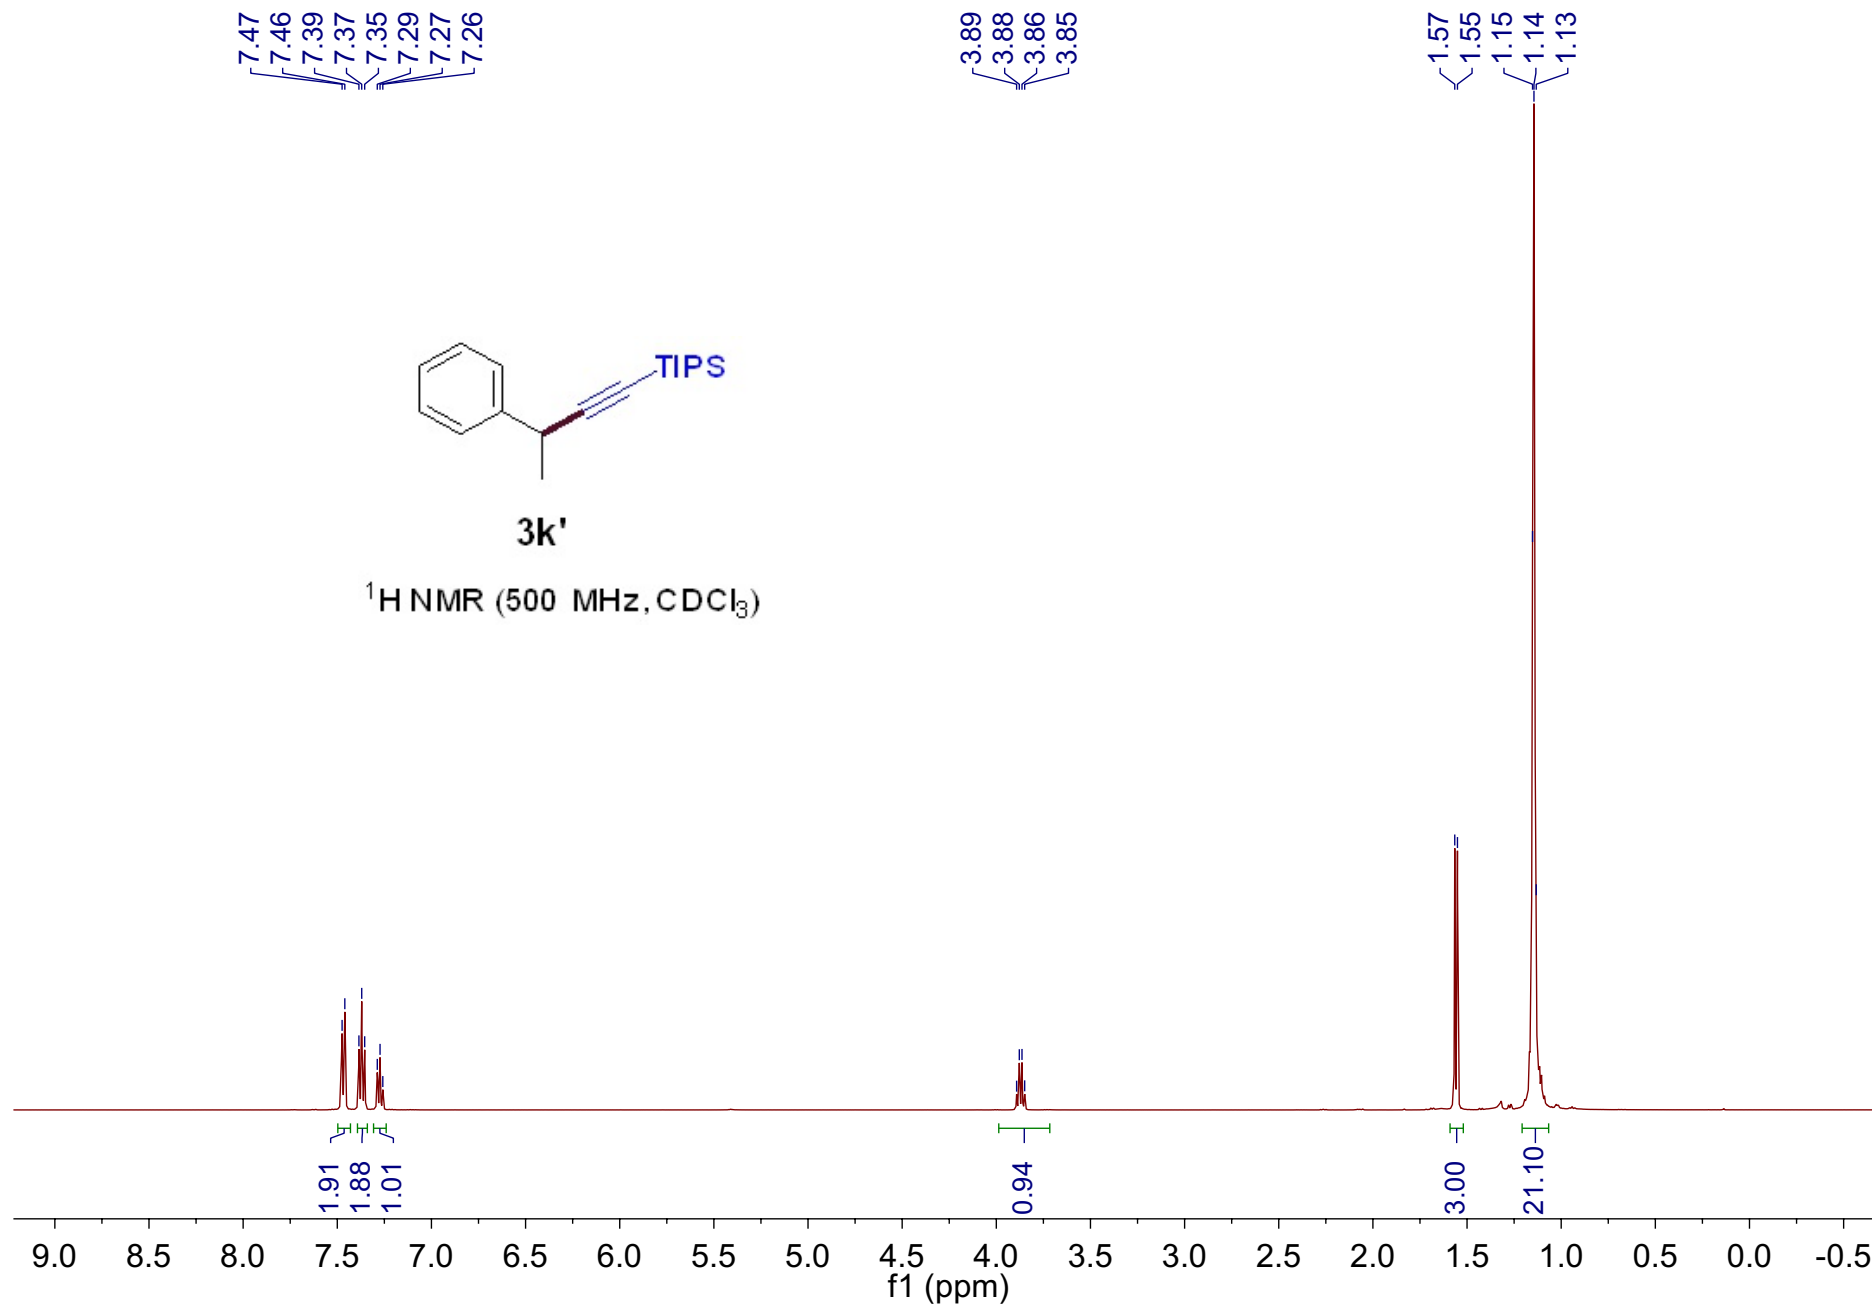

Supplementary Fig. 105.  $^1\text{H NMR}$  (500 MHz,  $\text{CDCl}_3$ ) spectra for compound **3k'**

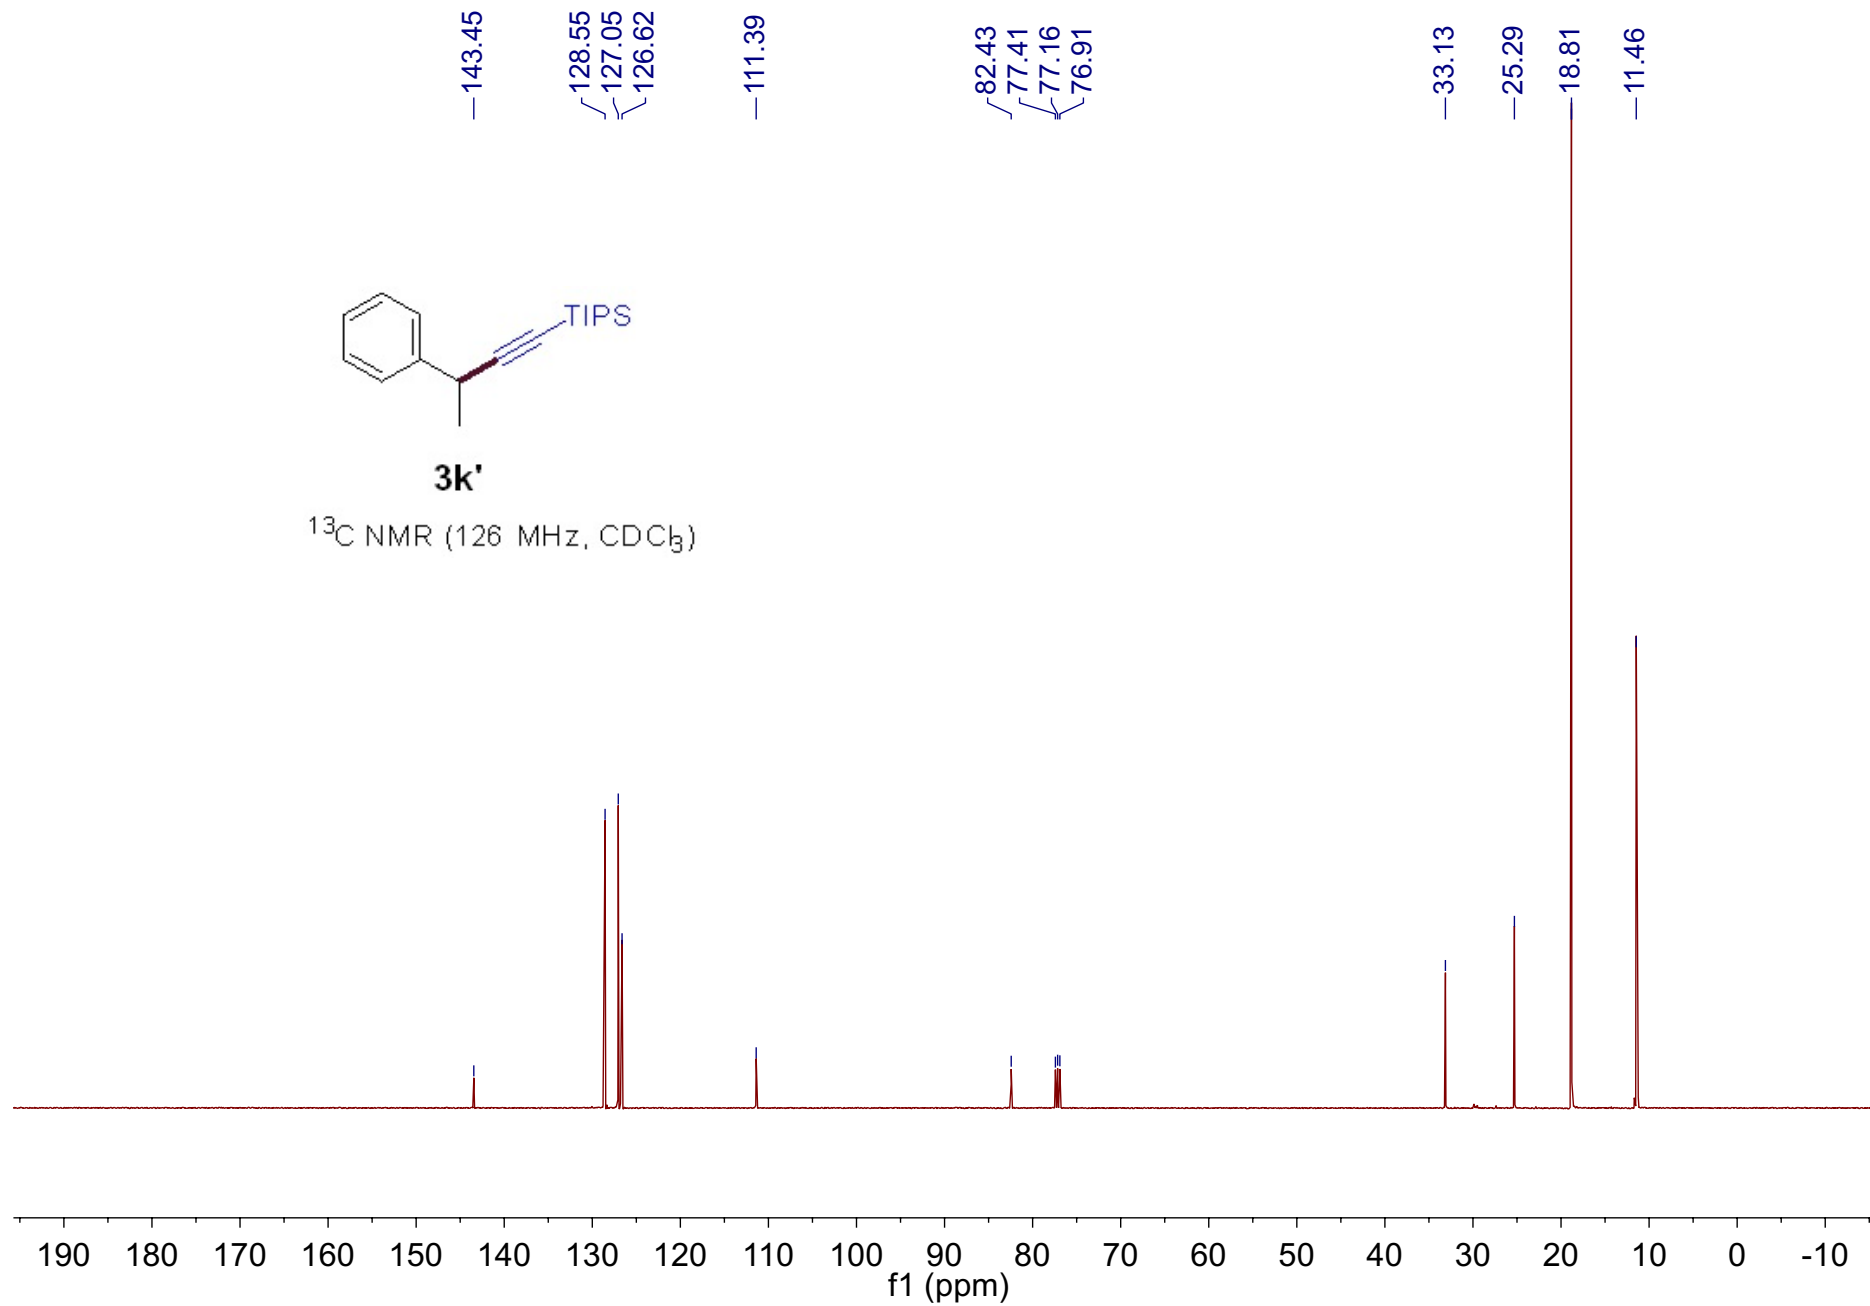

**Supplementary Fig. 106.** <sup>13</sup>C NMR (126 MHz, CDCl<sub>3</sub>) spectra for compound **3k'**

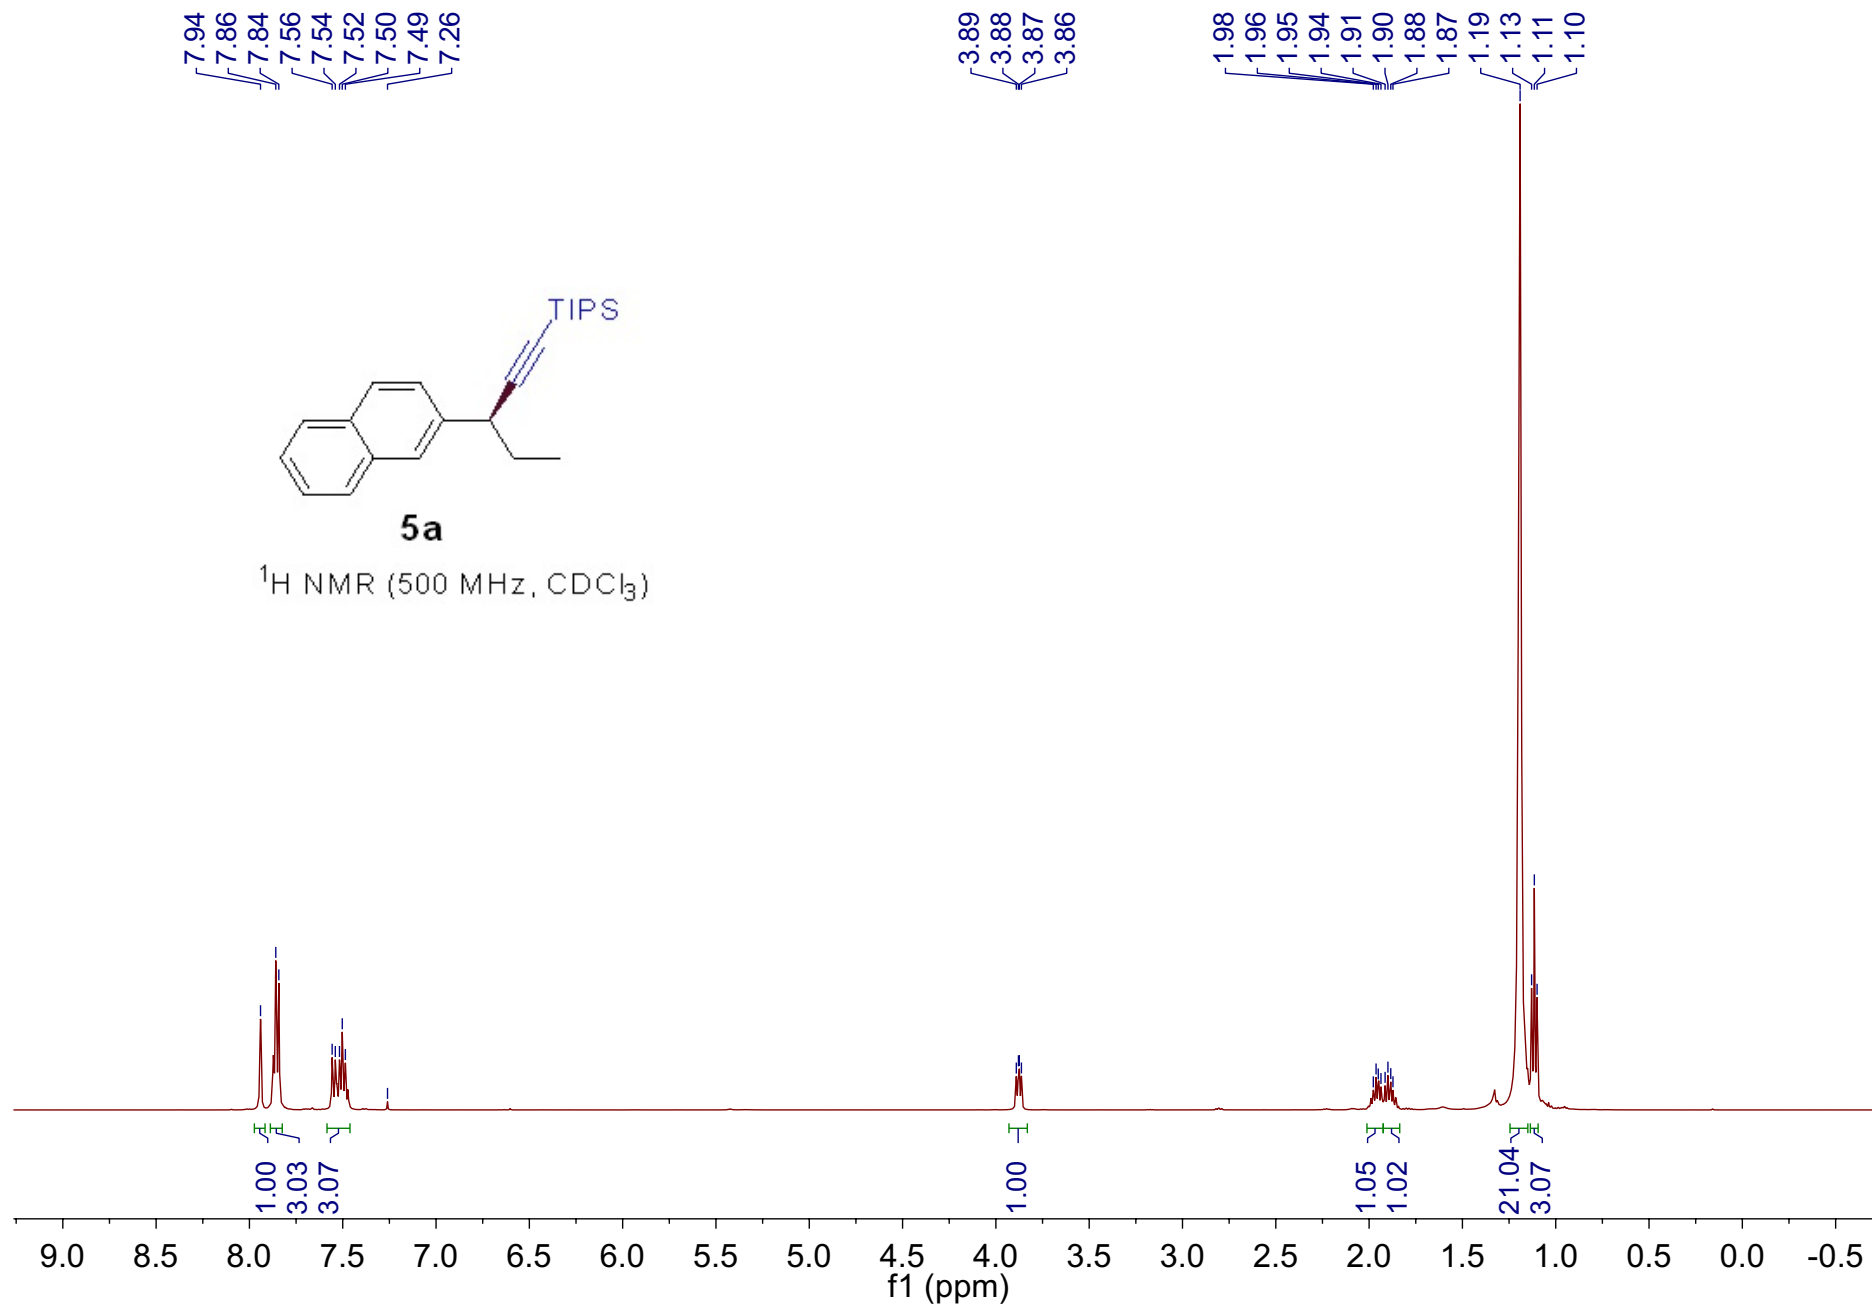

**Supplementary Fig. 107.** <sup>1</sup>H NMR (500 MHz, CDCl<sub>3</sub>) spectra for compound **5a**

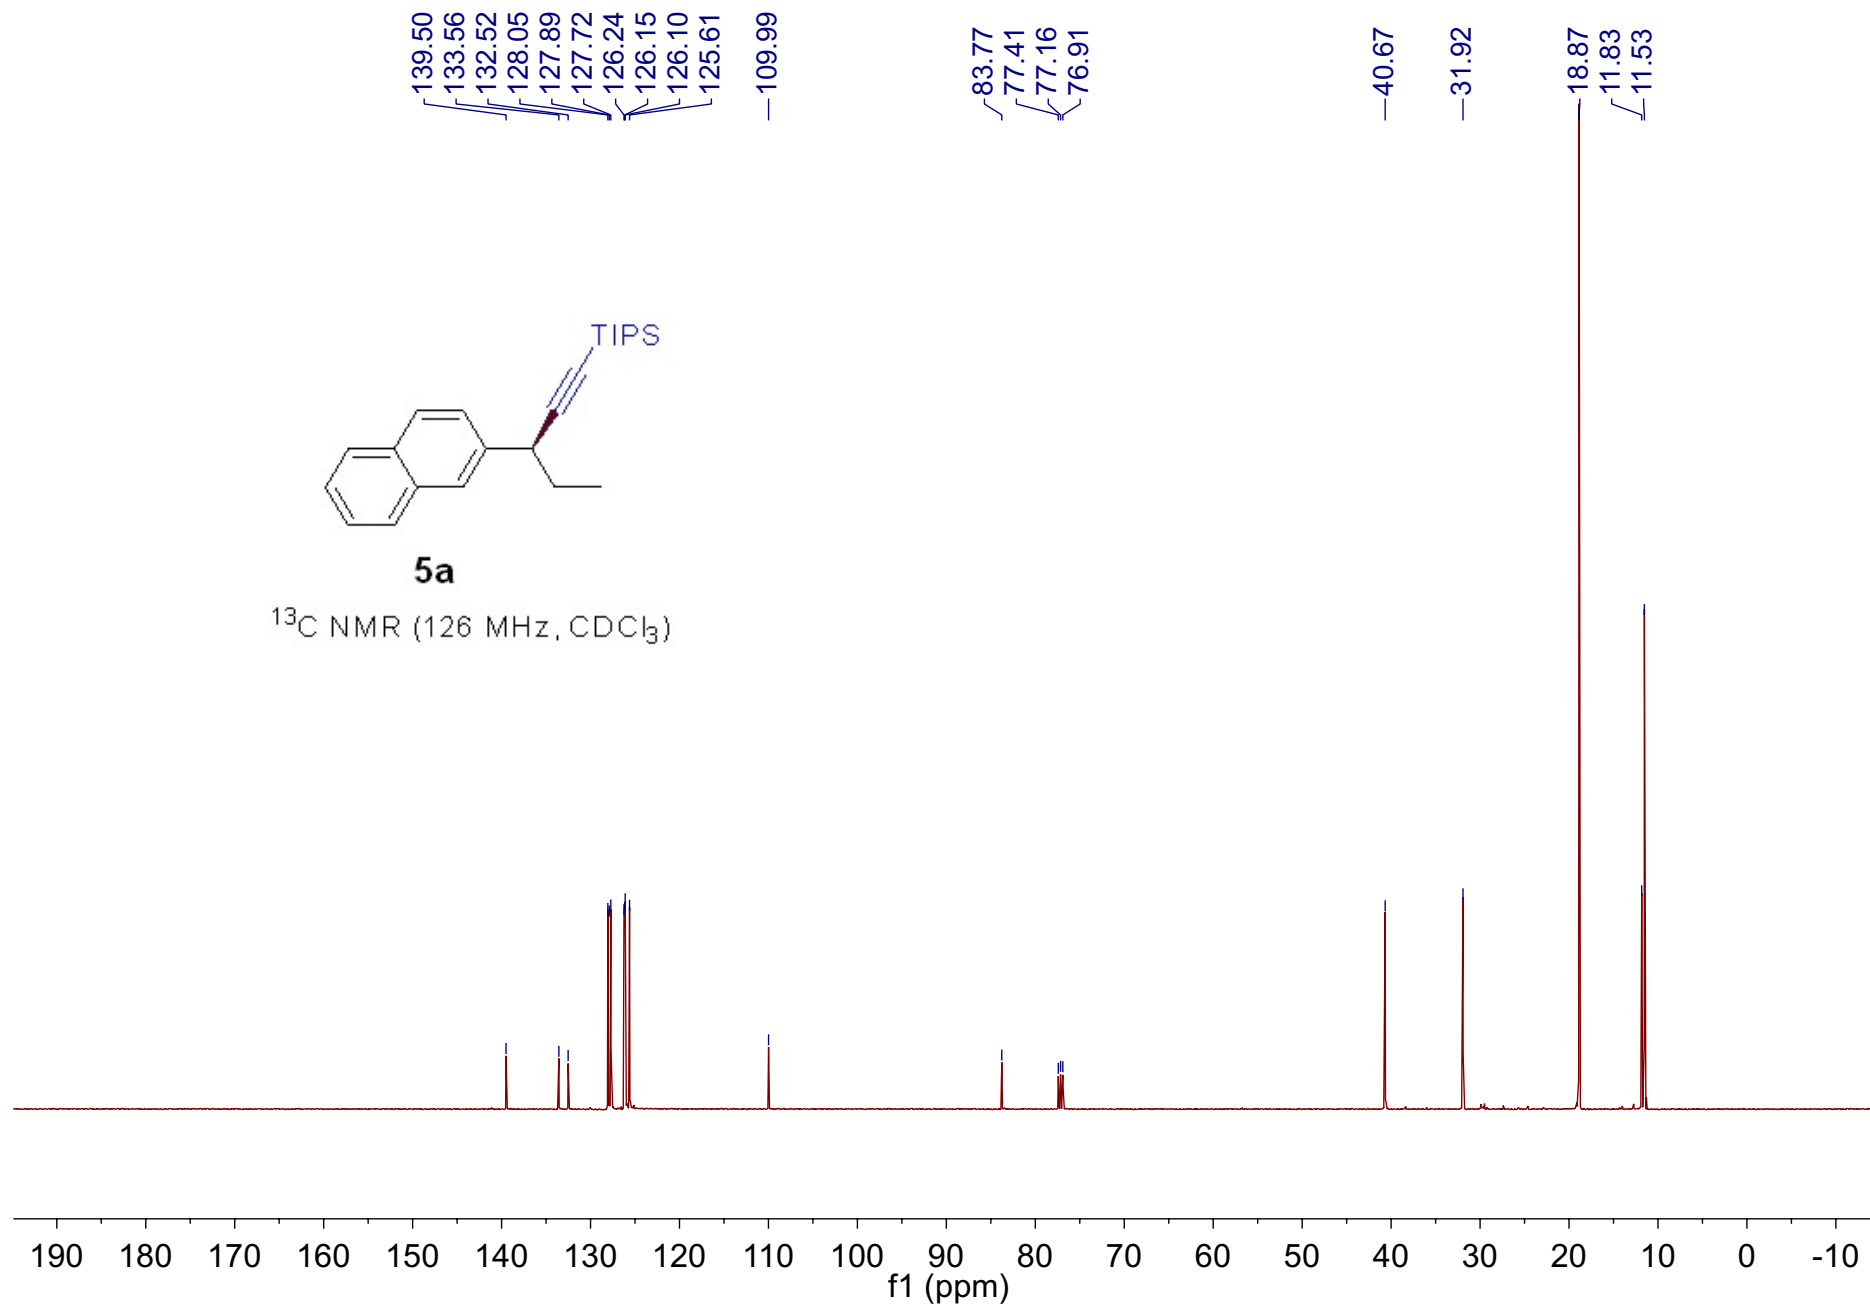

**Supplementary Fig. 108.**  $^{13}\text{C}$  NMR (126 MHz,  $\text{CDCl}_3$ ) spectra for compound **5a**



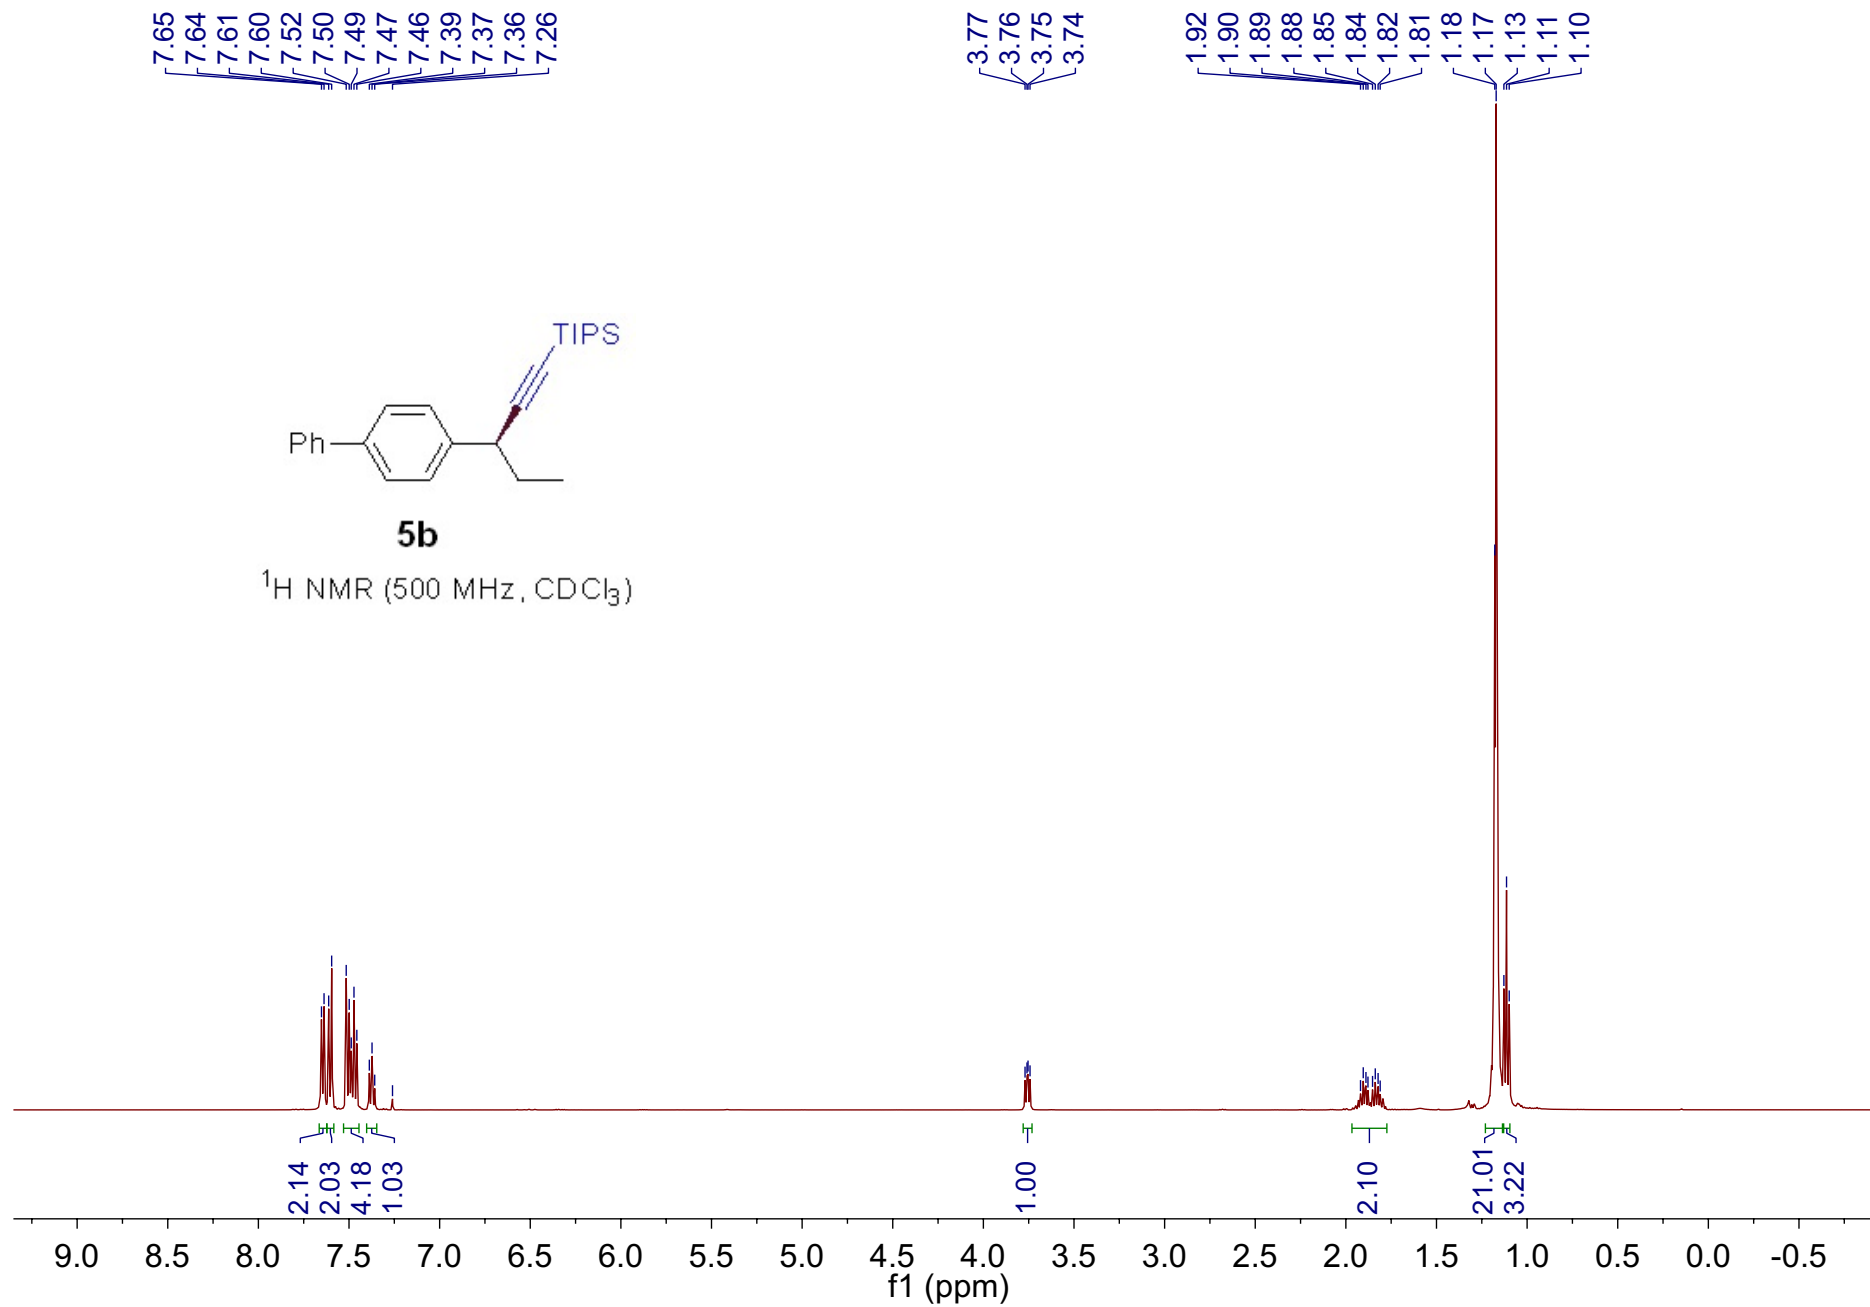

**Supplementary Fig. 109.** <sup>1</sup>H NMR (500 MHz, CDCl<sub>3</sub>) spectra for compound **5b**

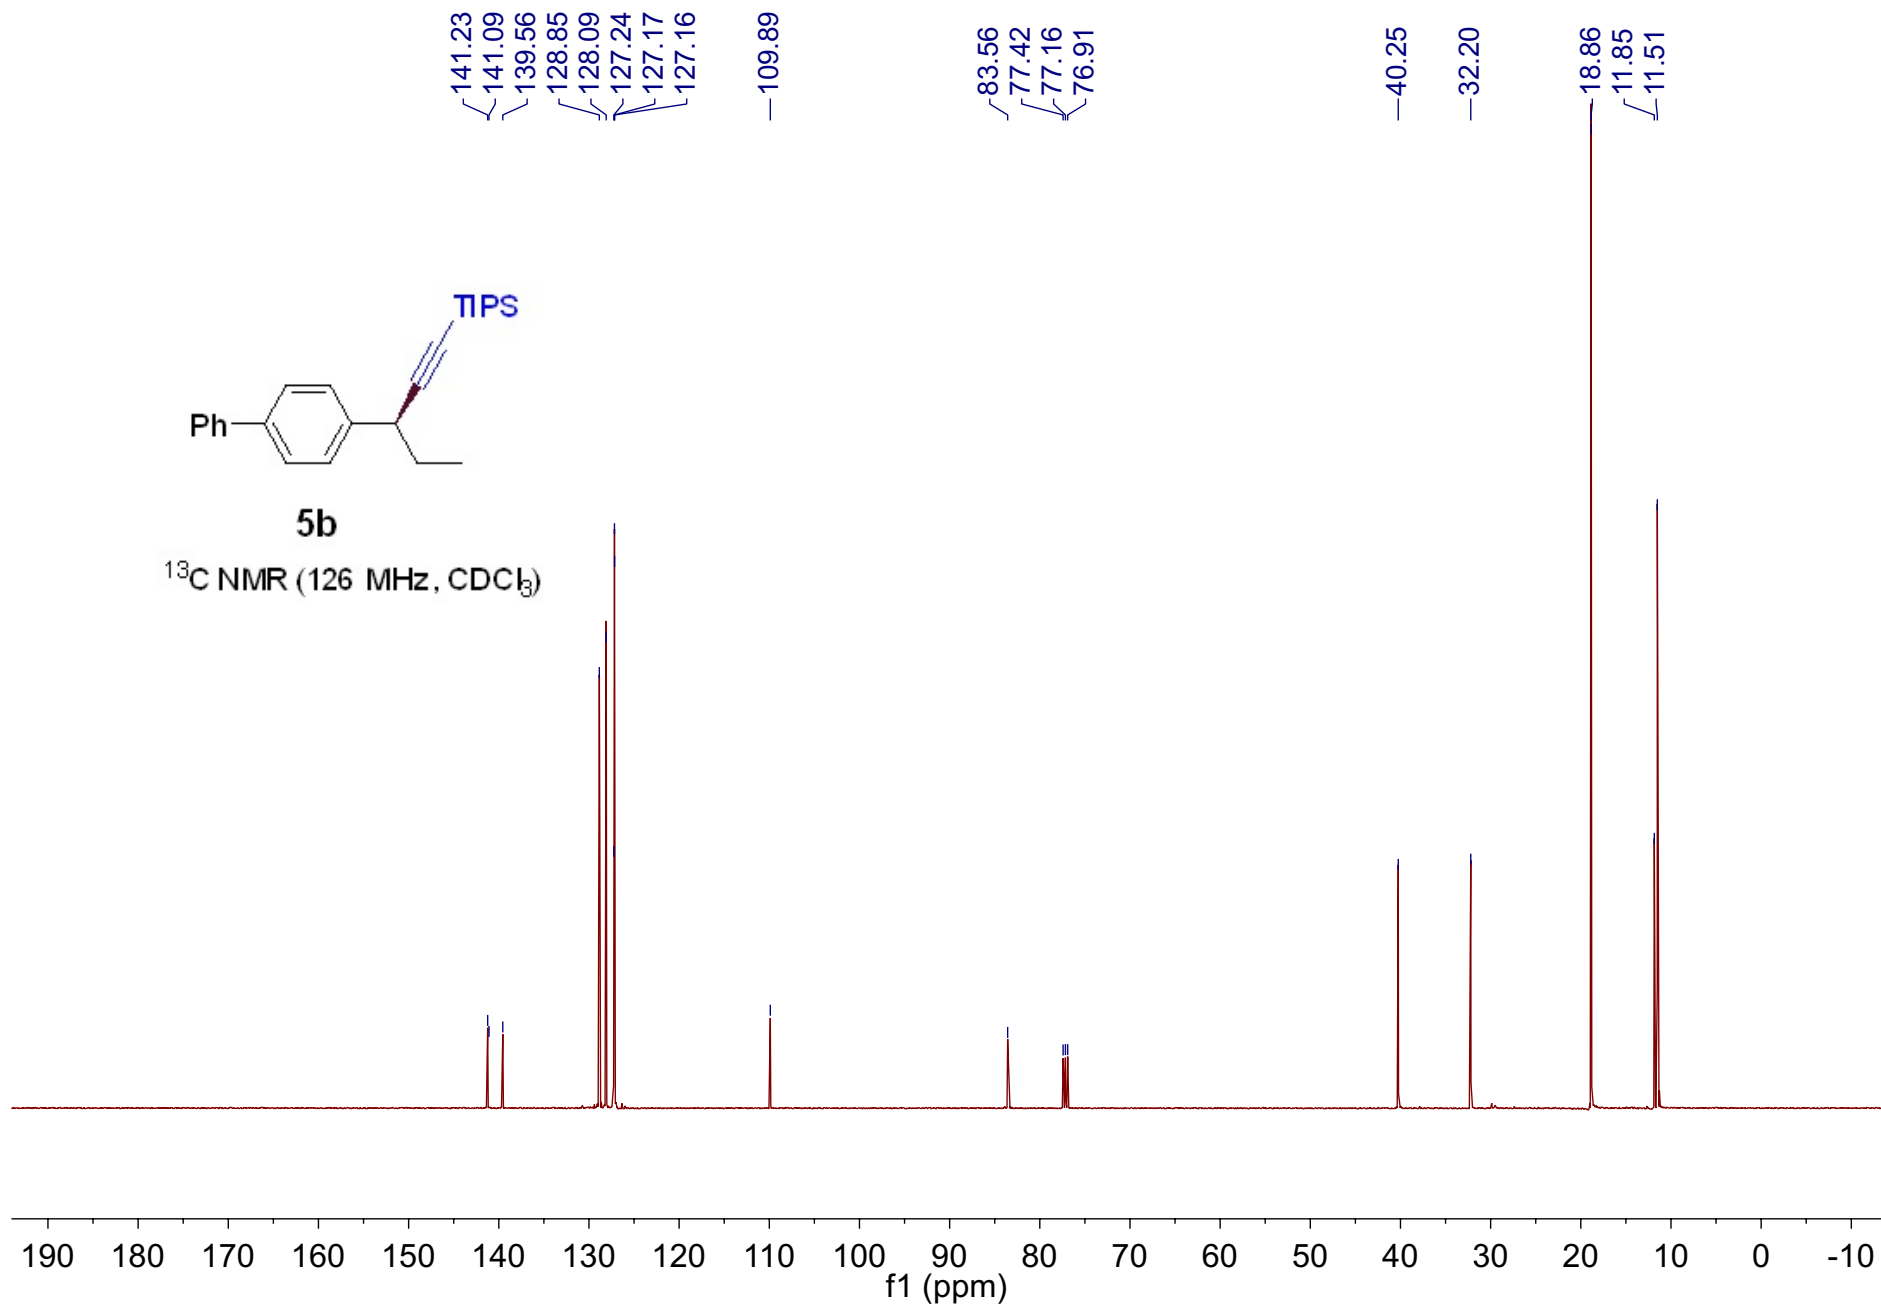

**Supplementary Fig. 110.** <sup>13</sup>C NMR (126 MHz, CDCl<sub>3</sub>) spectra for compound **5b**

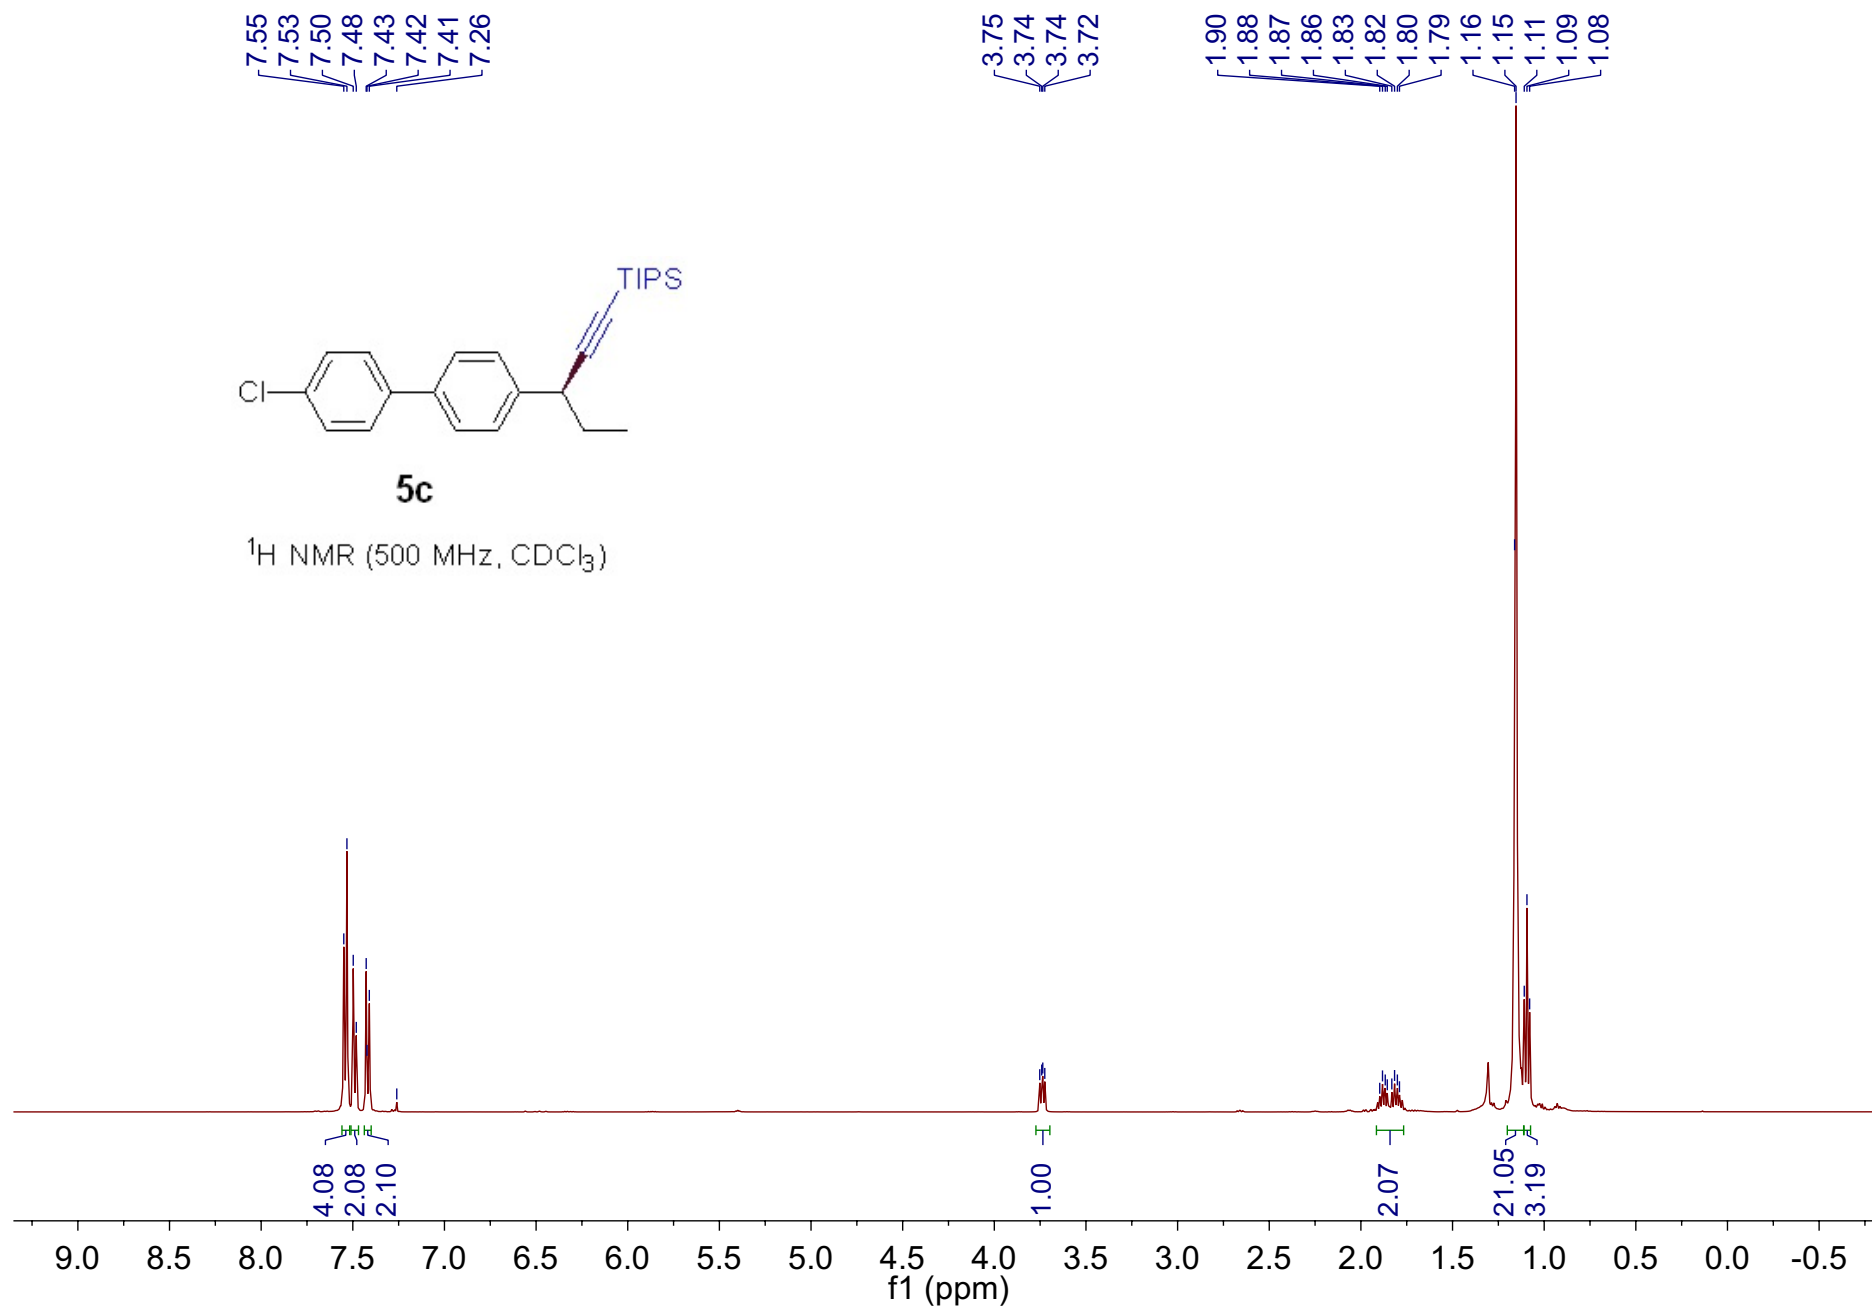

Supplementary Fig. 111.  $^1\text{H}$  NMR (500 MHz,  $\text{CDCl}_3$ ) spectra for compound **5c**

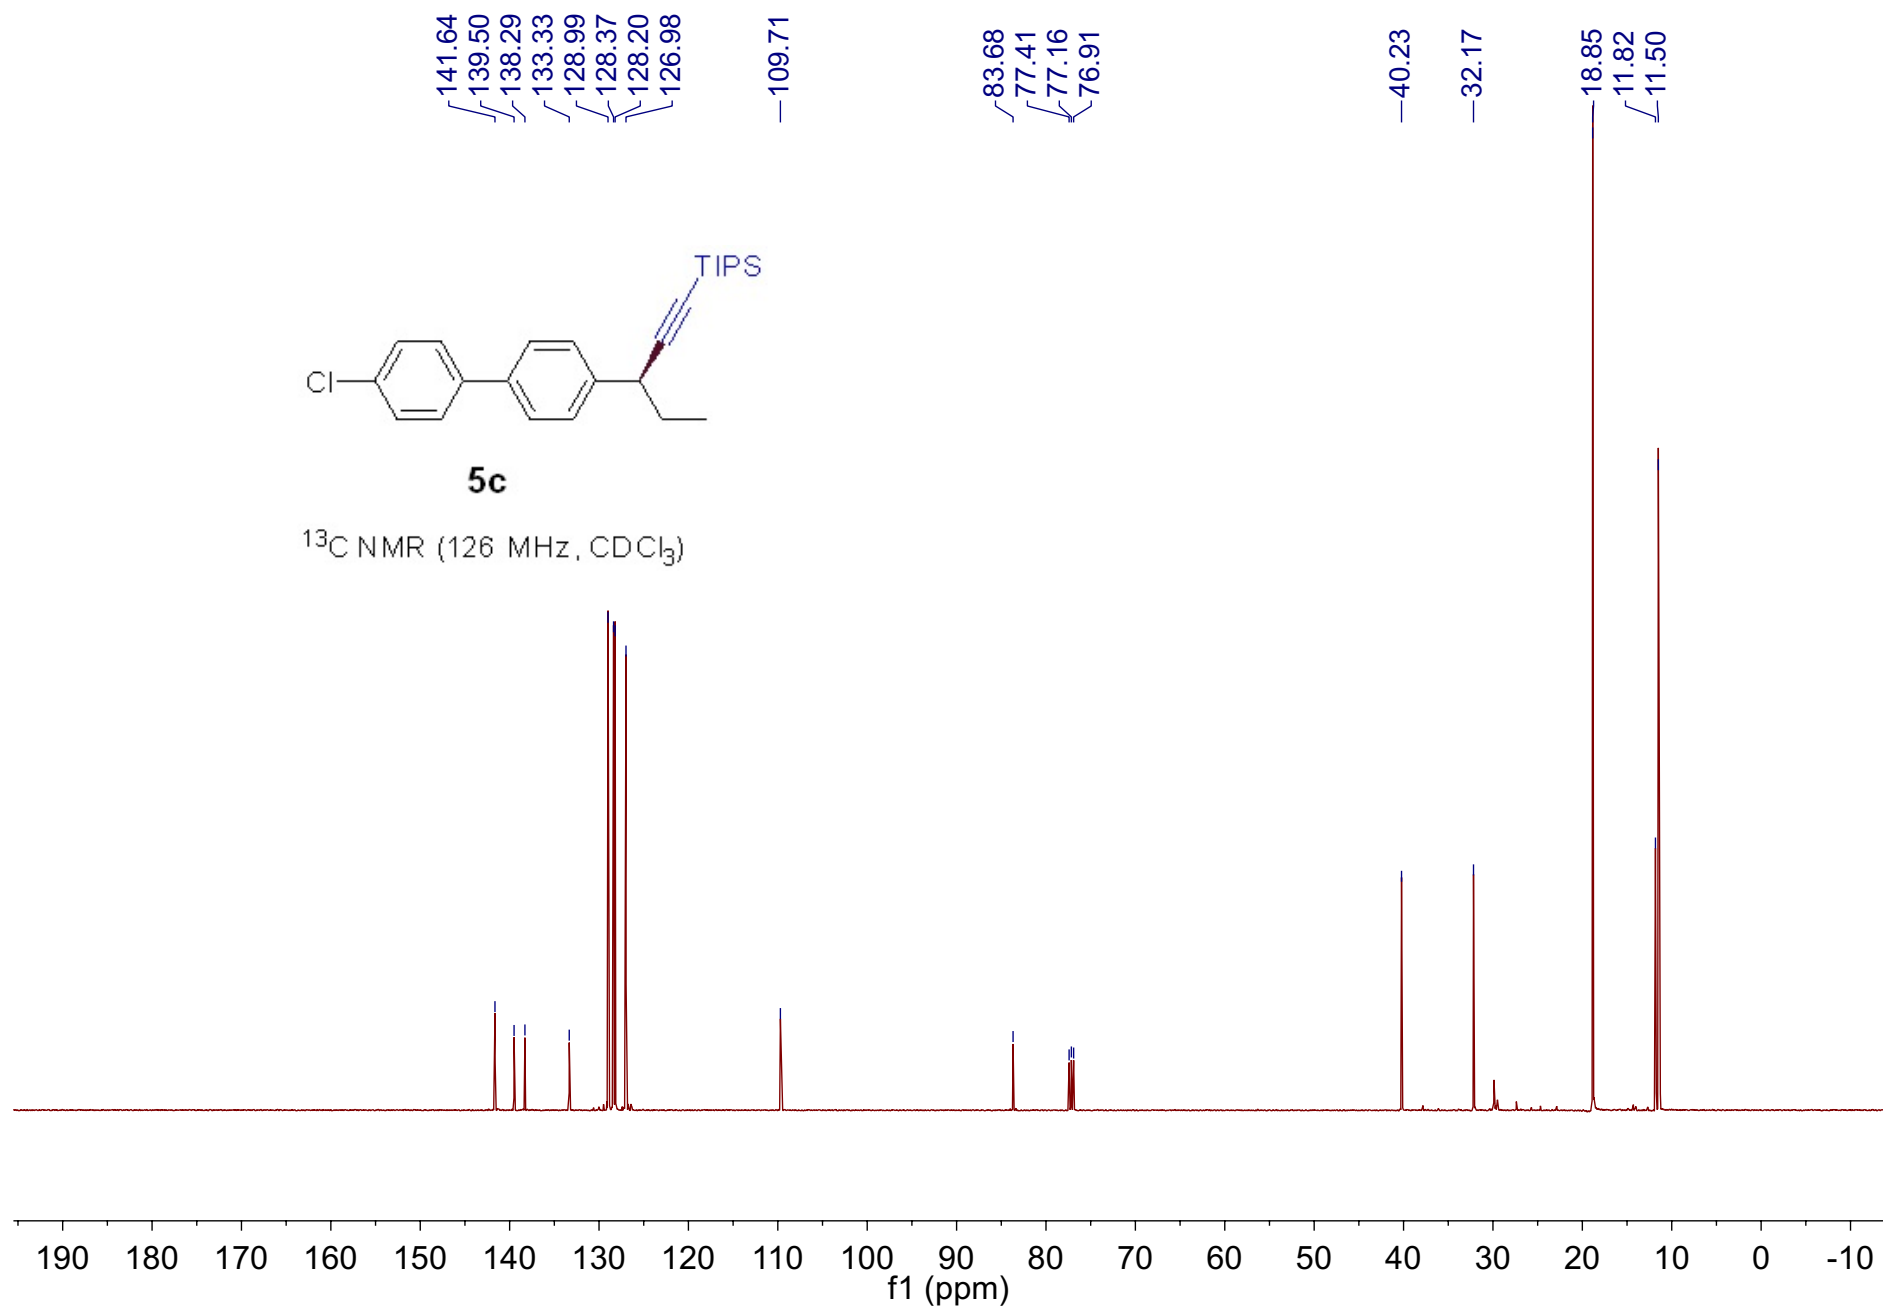

Supplementary Fig. 112.  $^{13}\text{C}$  NMR (126 MHz,  $\text{CDCl}_3$ ) spectra for compound **5c**

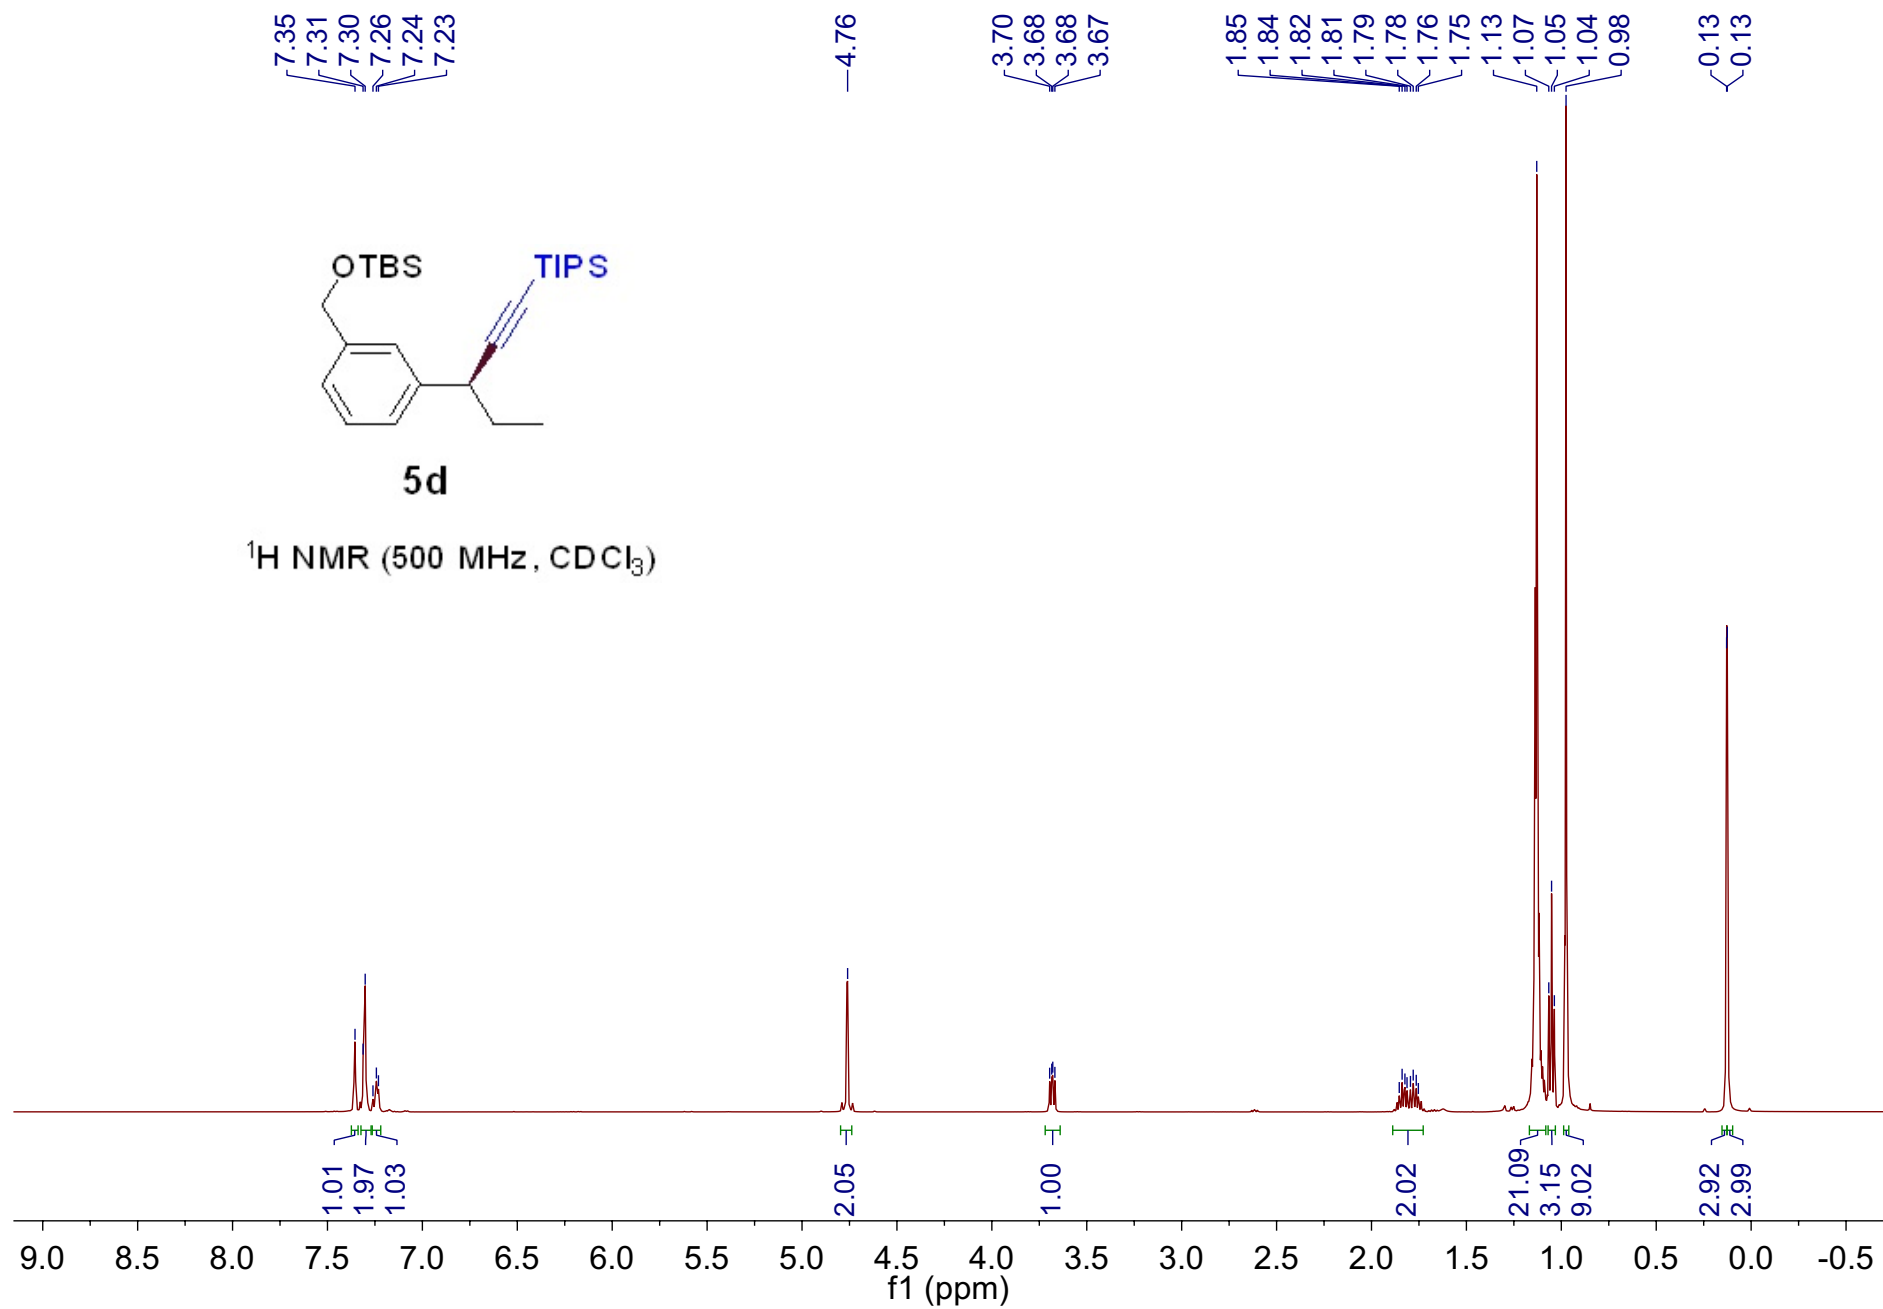

**Supplementary Fig. 113.**  $^1\text{H}$  NMR (500 MHz,  $\text{CDCl}_3$ ) spectra for compound **5d**

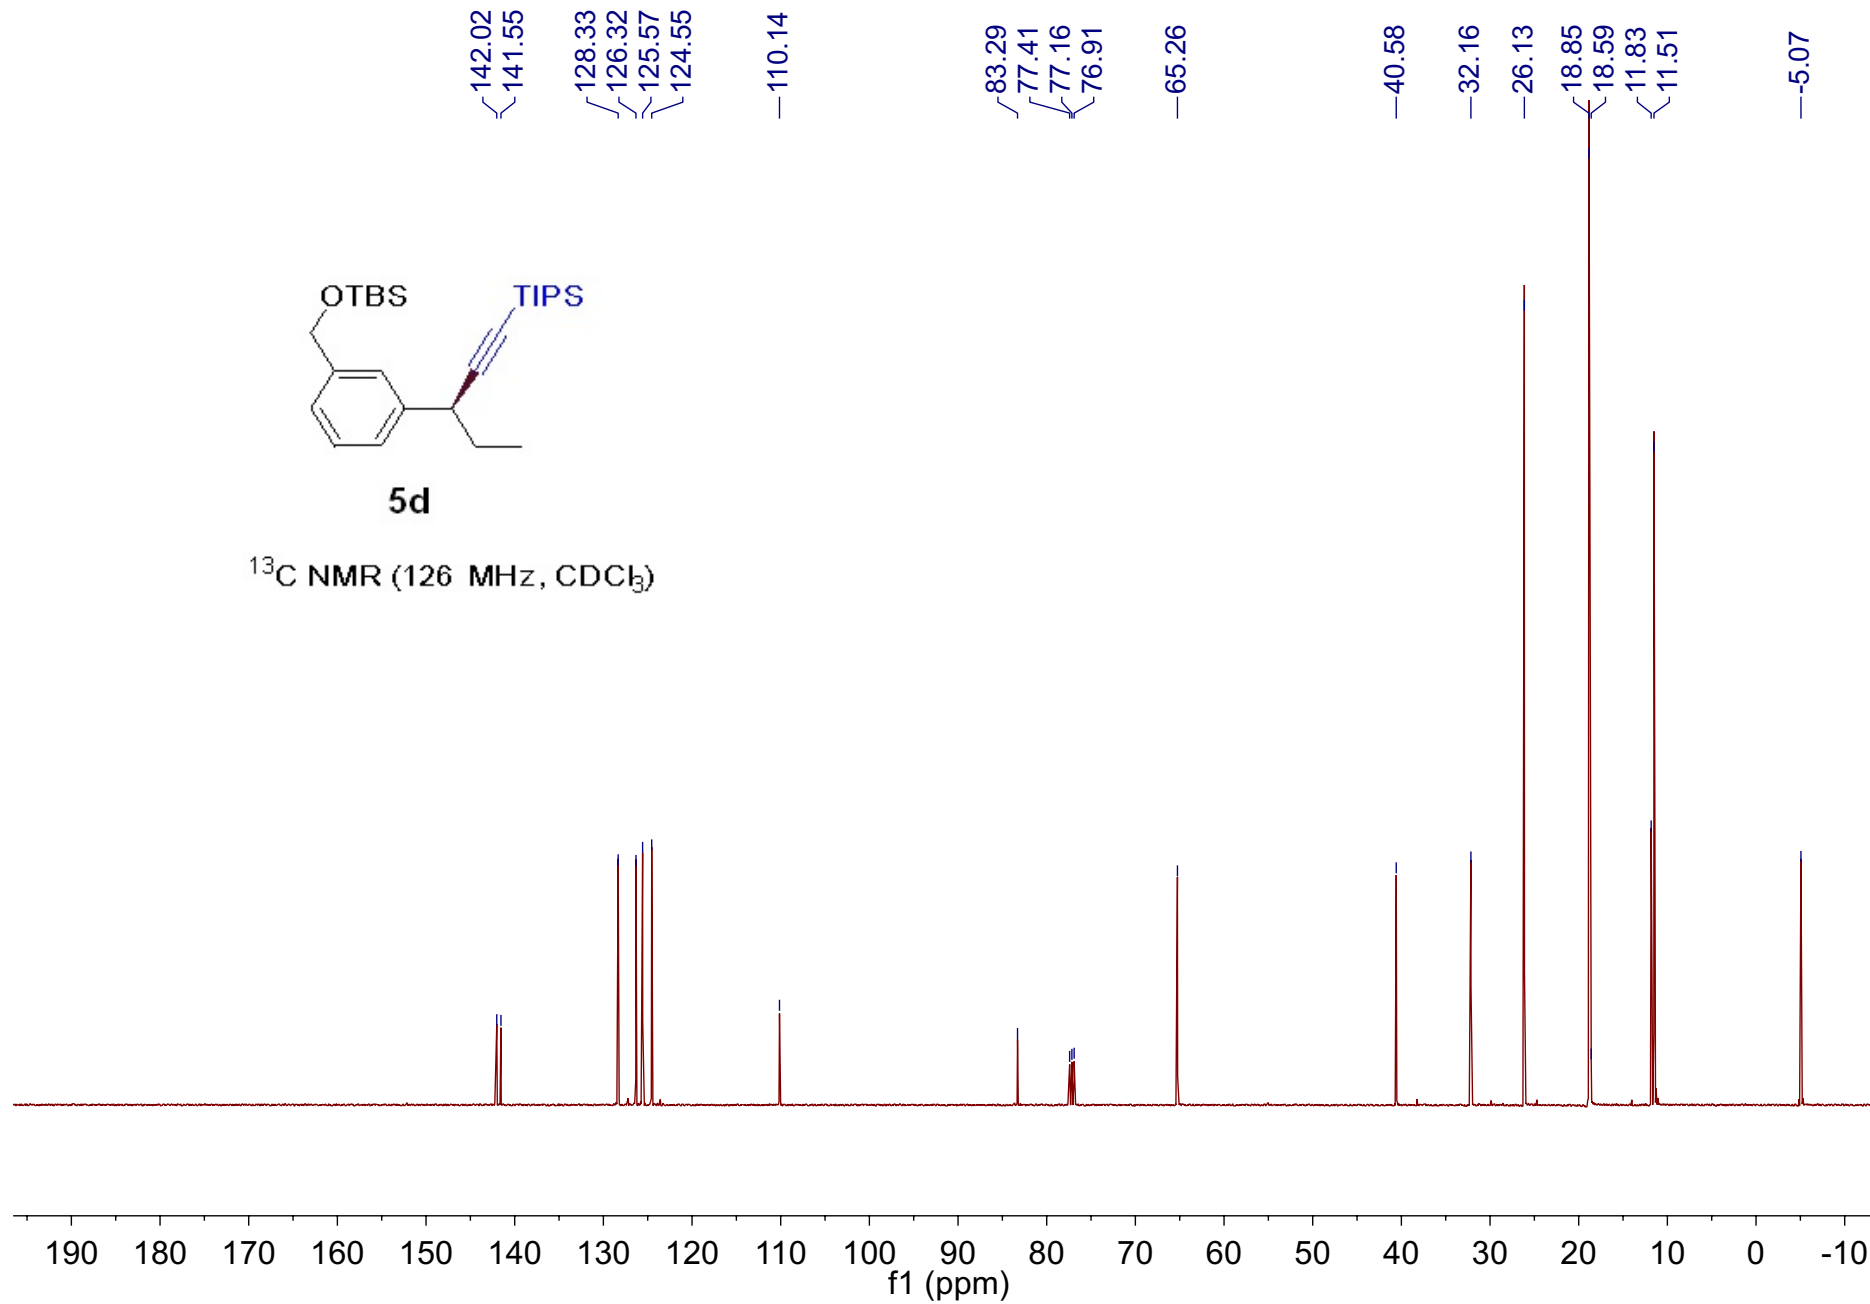

**Supplementary Fig. 114.**  $^{13}\text{C}$  NMR (126 MHz,  $\text{CDCl}_3$ ) spectra for compound **5d**

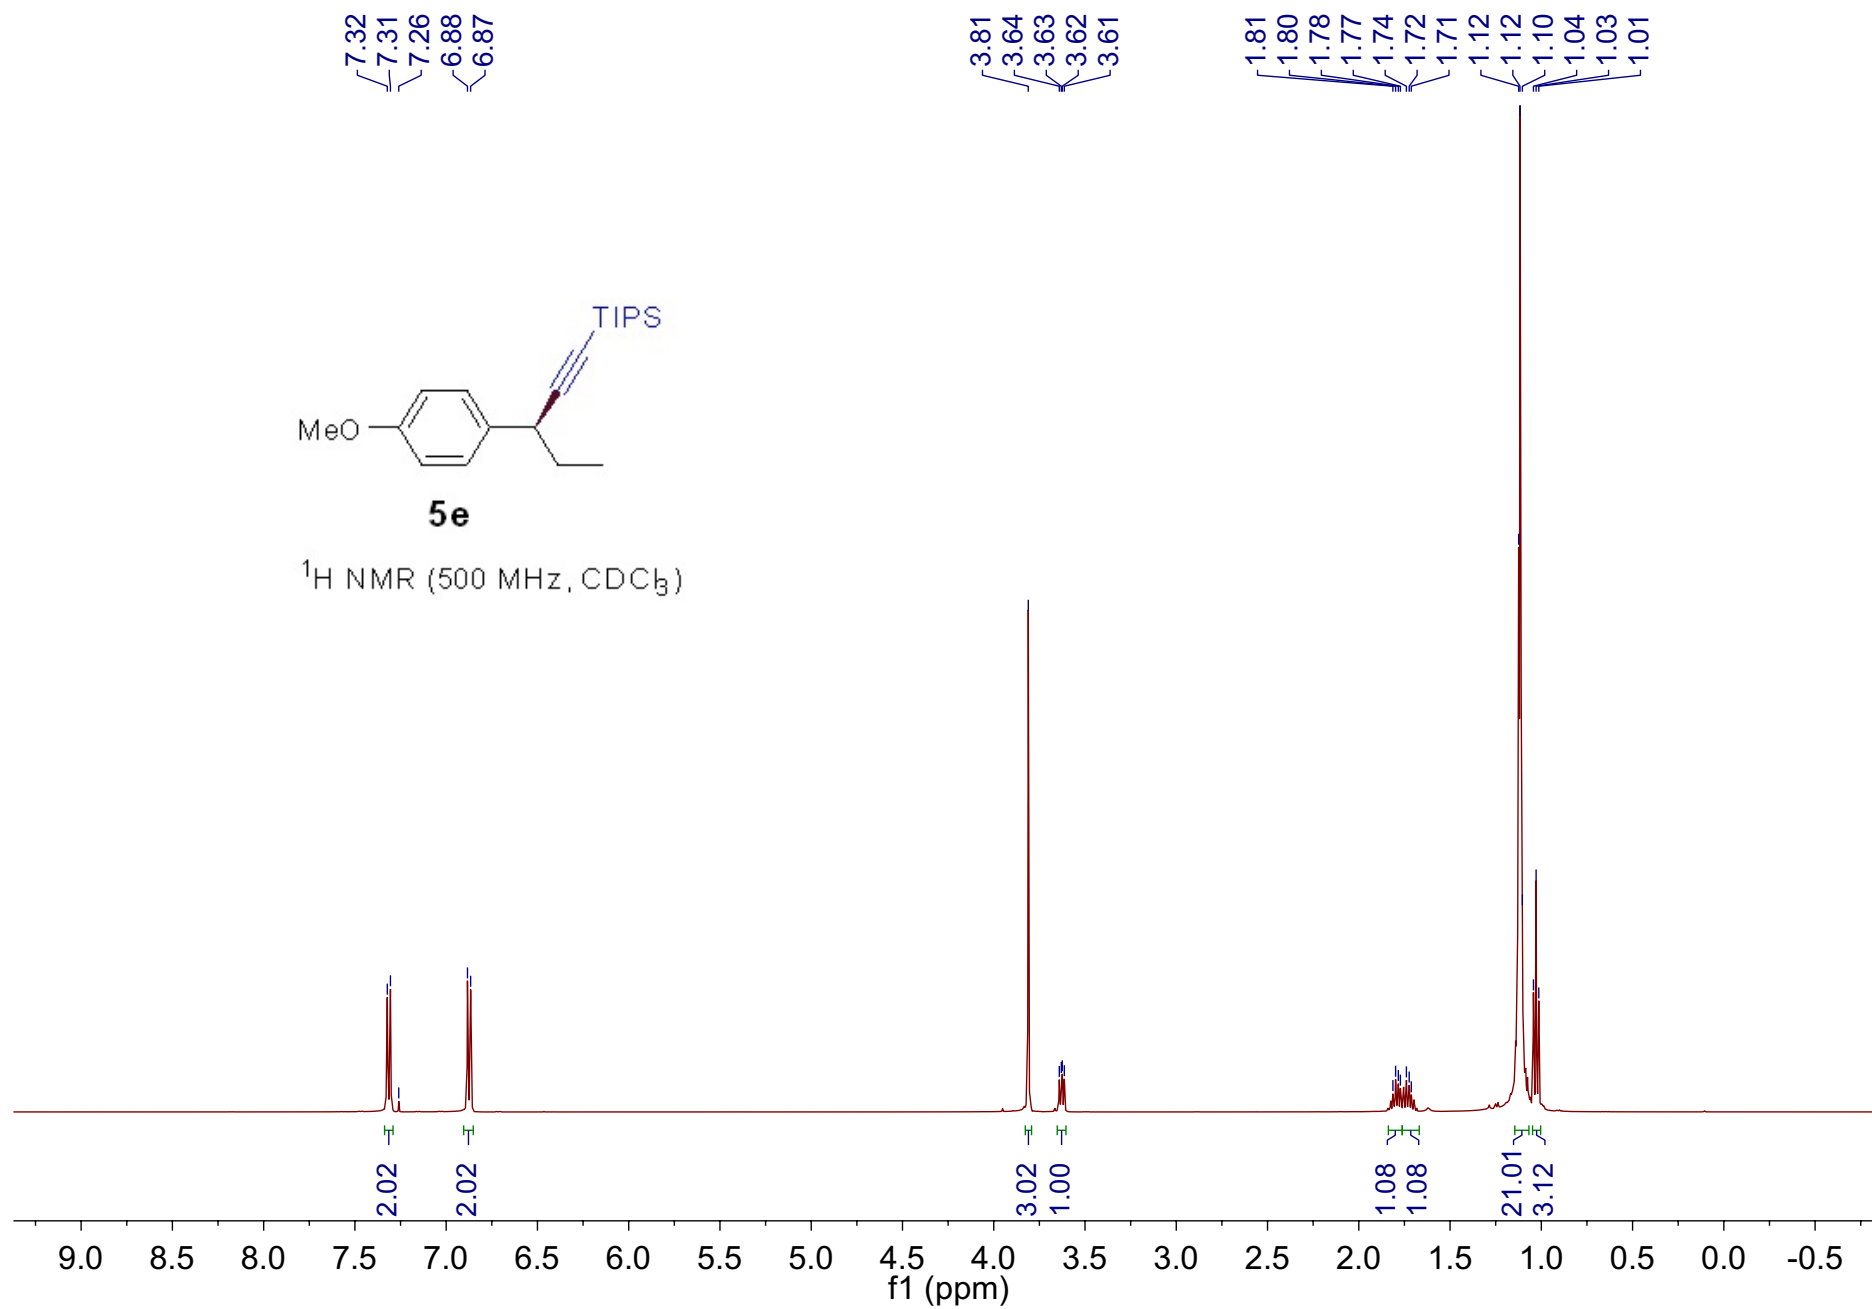

Supplementary Fig. 115. <sup>1</sup>H NMR (500 MHz, CDCl<sub>3</sub>) spectra for compound **5e**

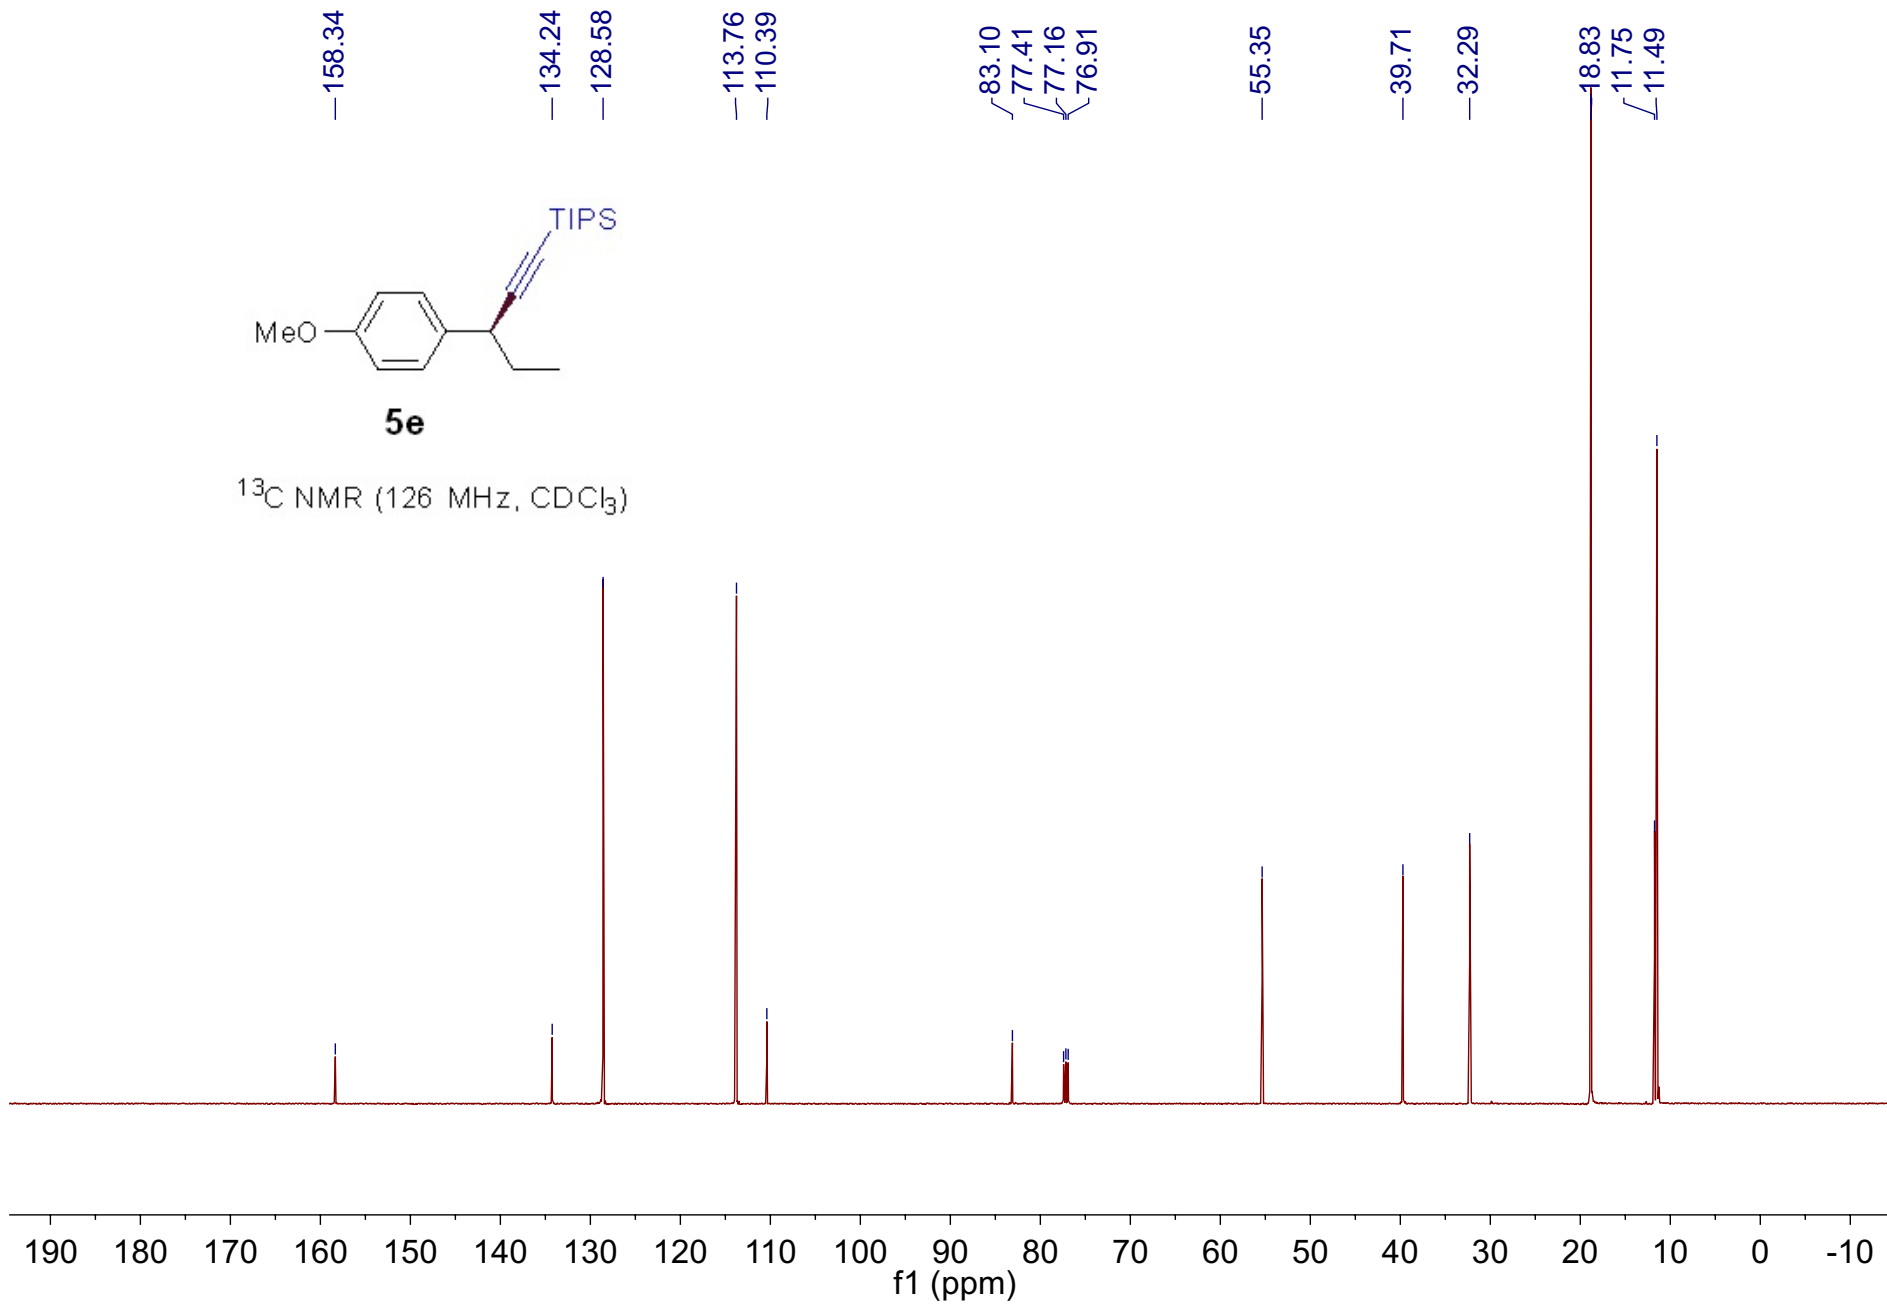

**Supplementary Fig. 116.**  $^{13}\text{C}$  NMR (126 MHz,  $\text{CDCl}_3$ ) spectra for compound **5e**



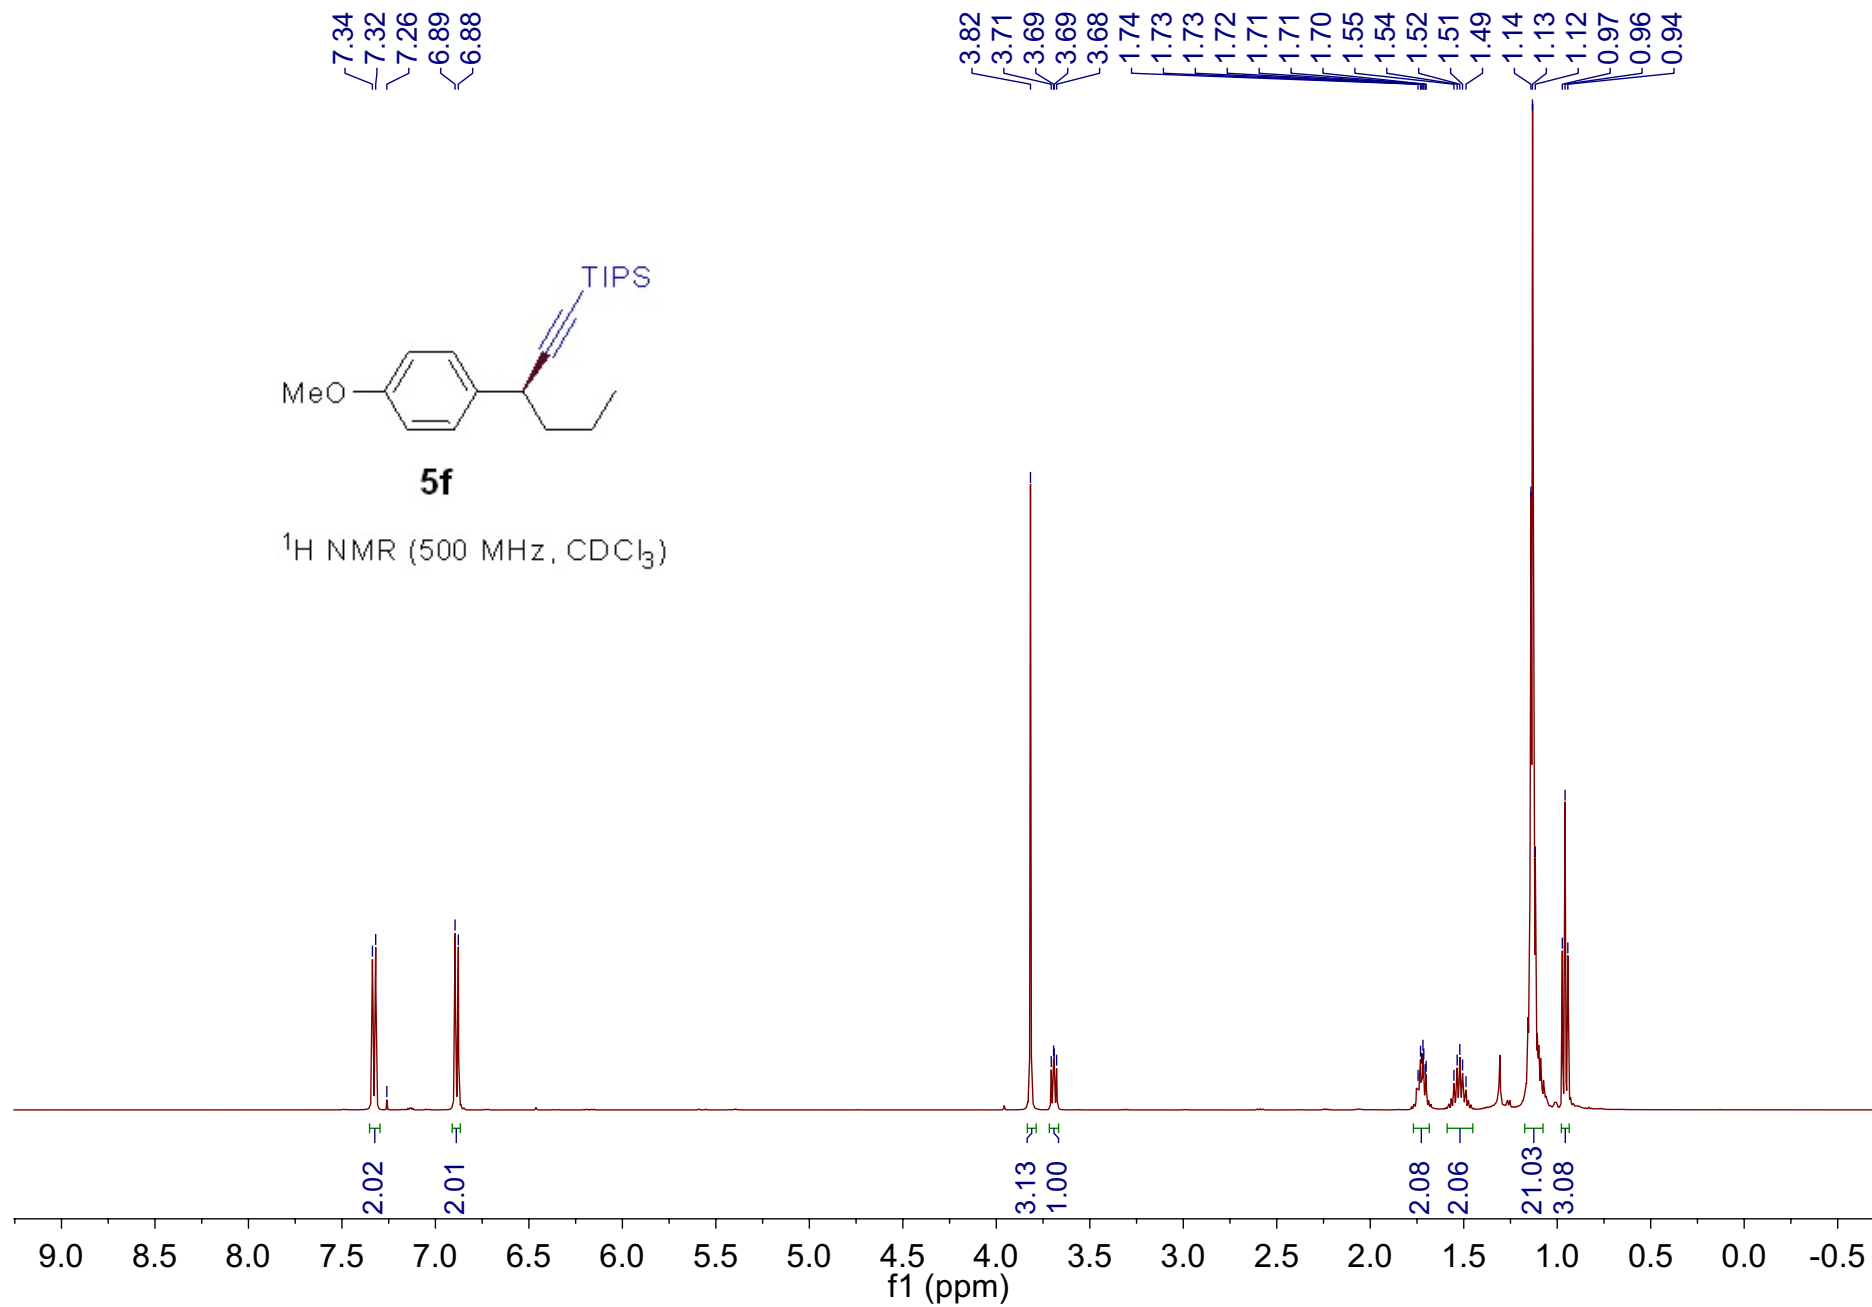

**Supplementary Fig. 117.** <sup>1</sup>H NMR (500 MHz, CDCl<sub>3</sub>) spectra for compound **5f**

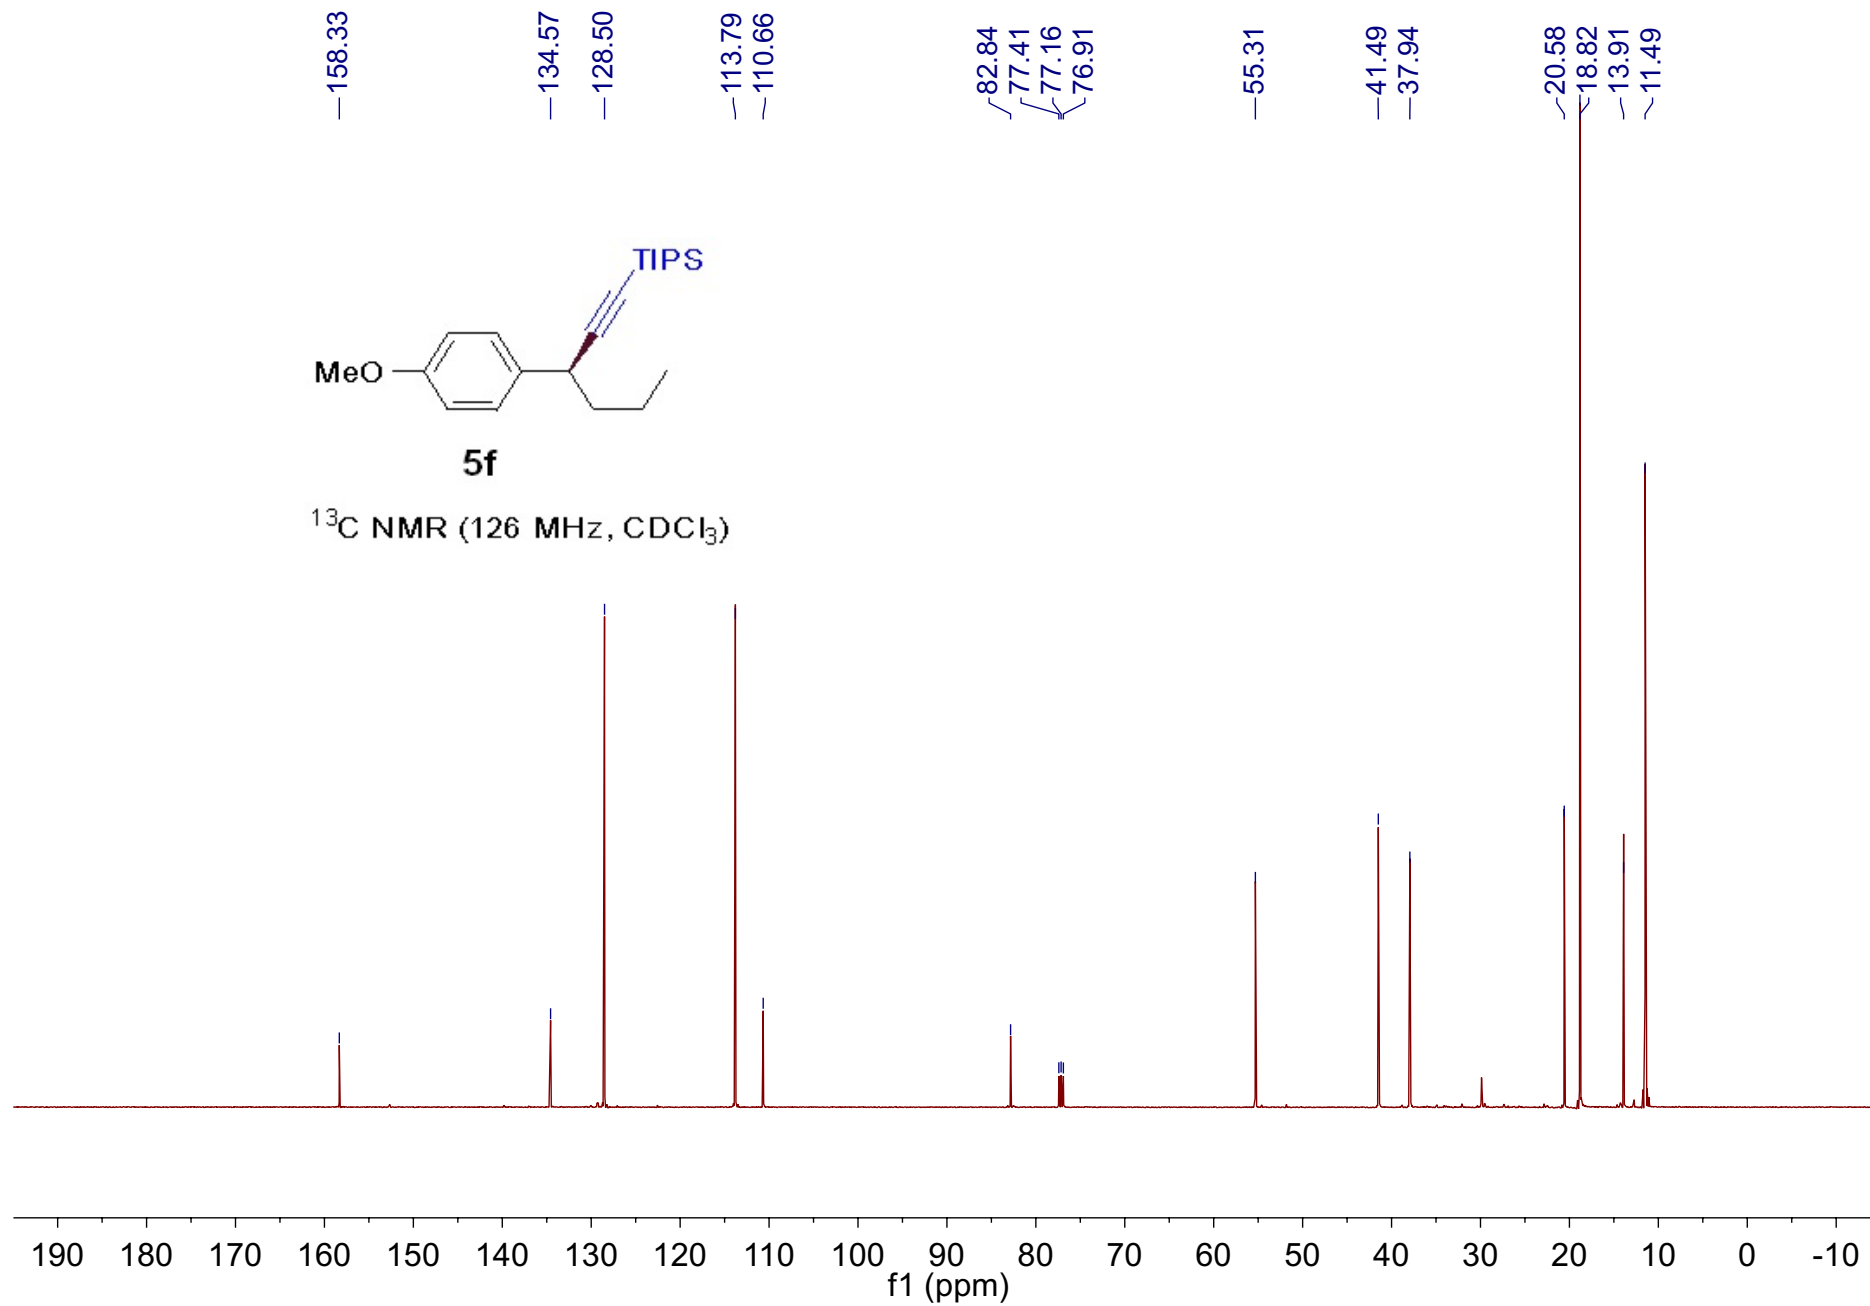

Supplementary Fig. 118.  $^{13}\text{C}$  NMR (126 MHz,  $\text{CDCl}_3$ ) spectra for compound **5f**

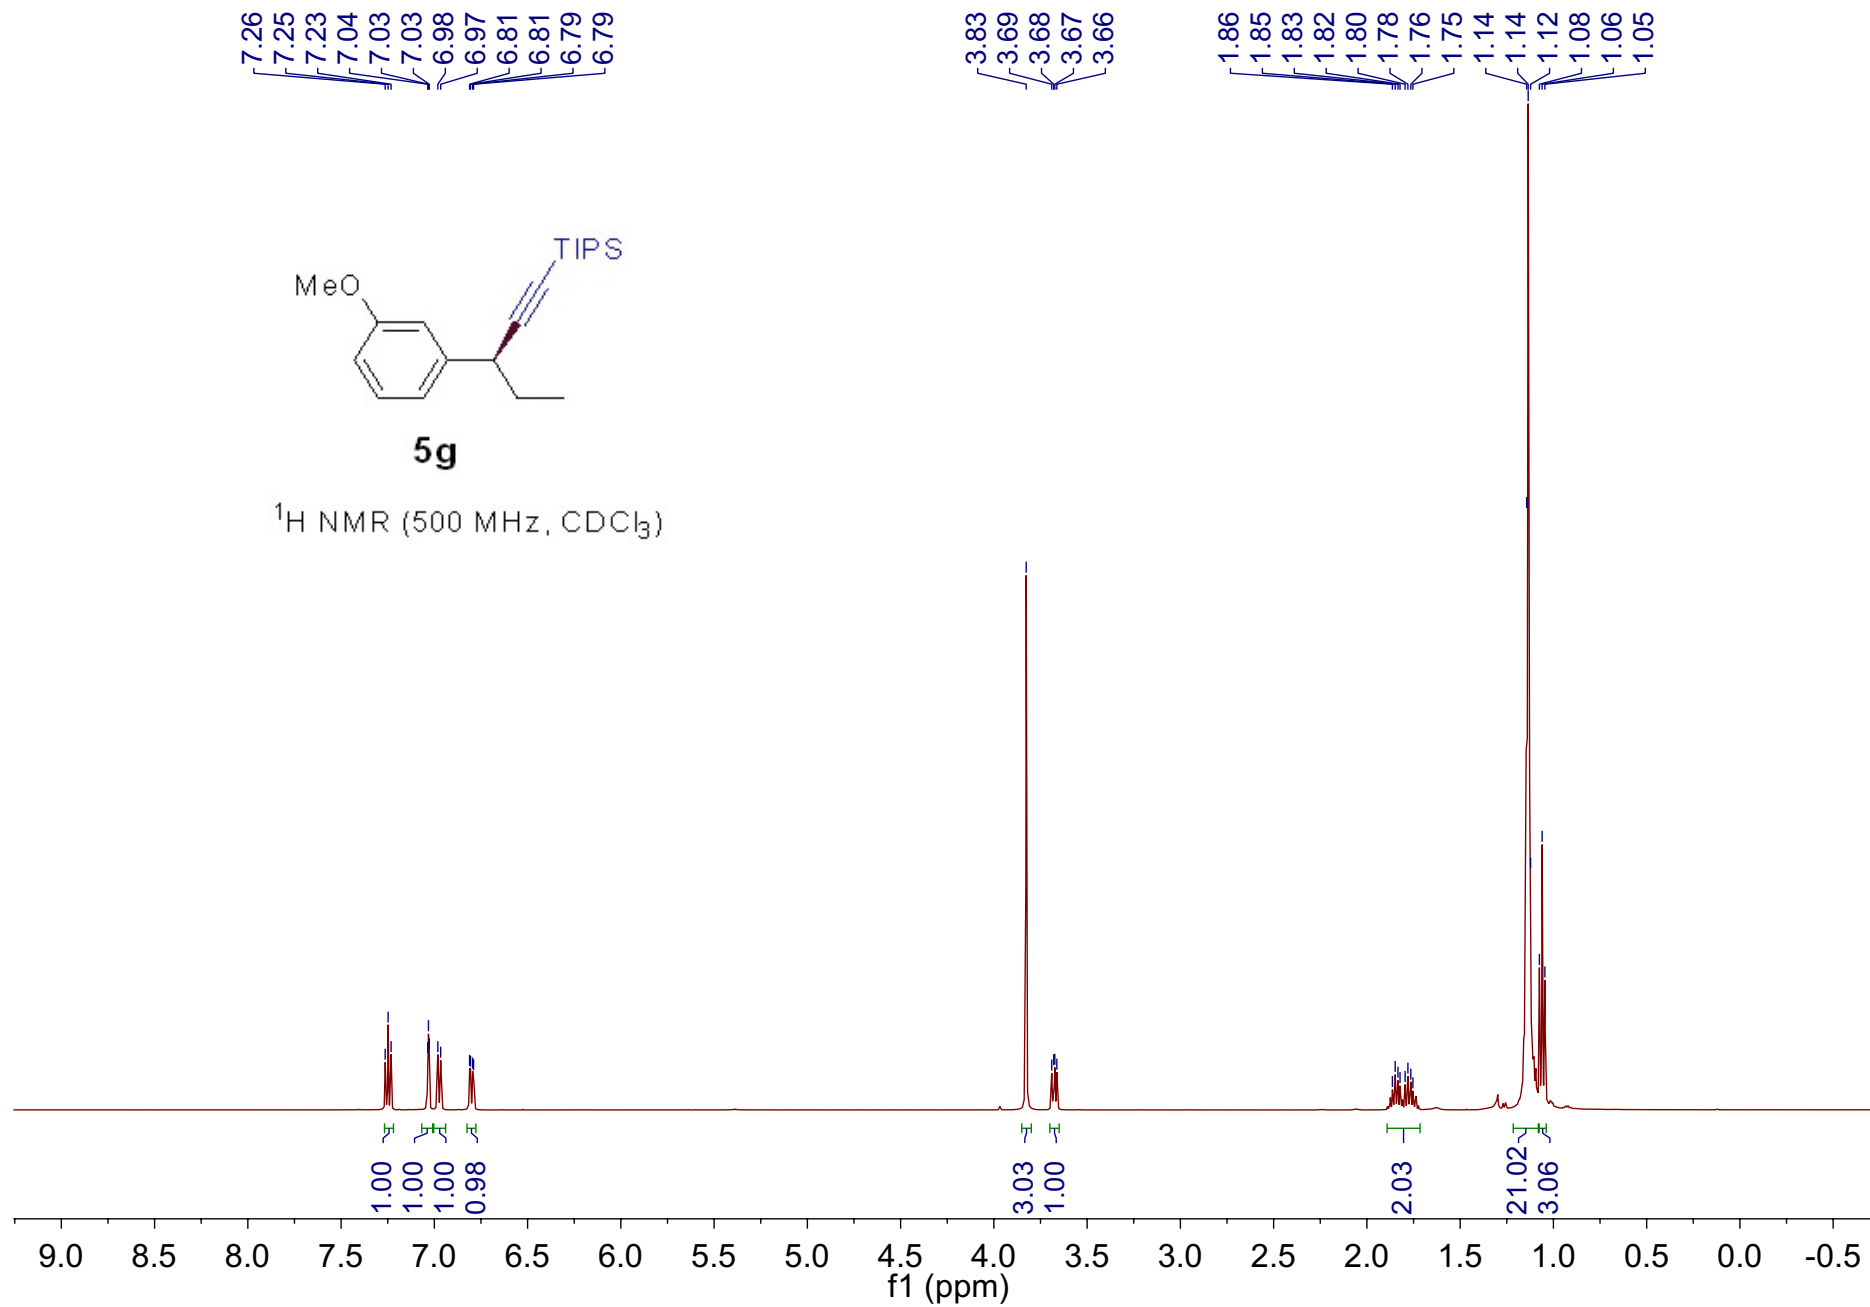

Supplementary Fig. 119.  $^1\text{H}$  NMR (500 MHz,  $\text{CDCl}_3$ ) spectra for compound **5g**

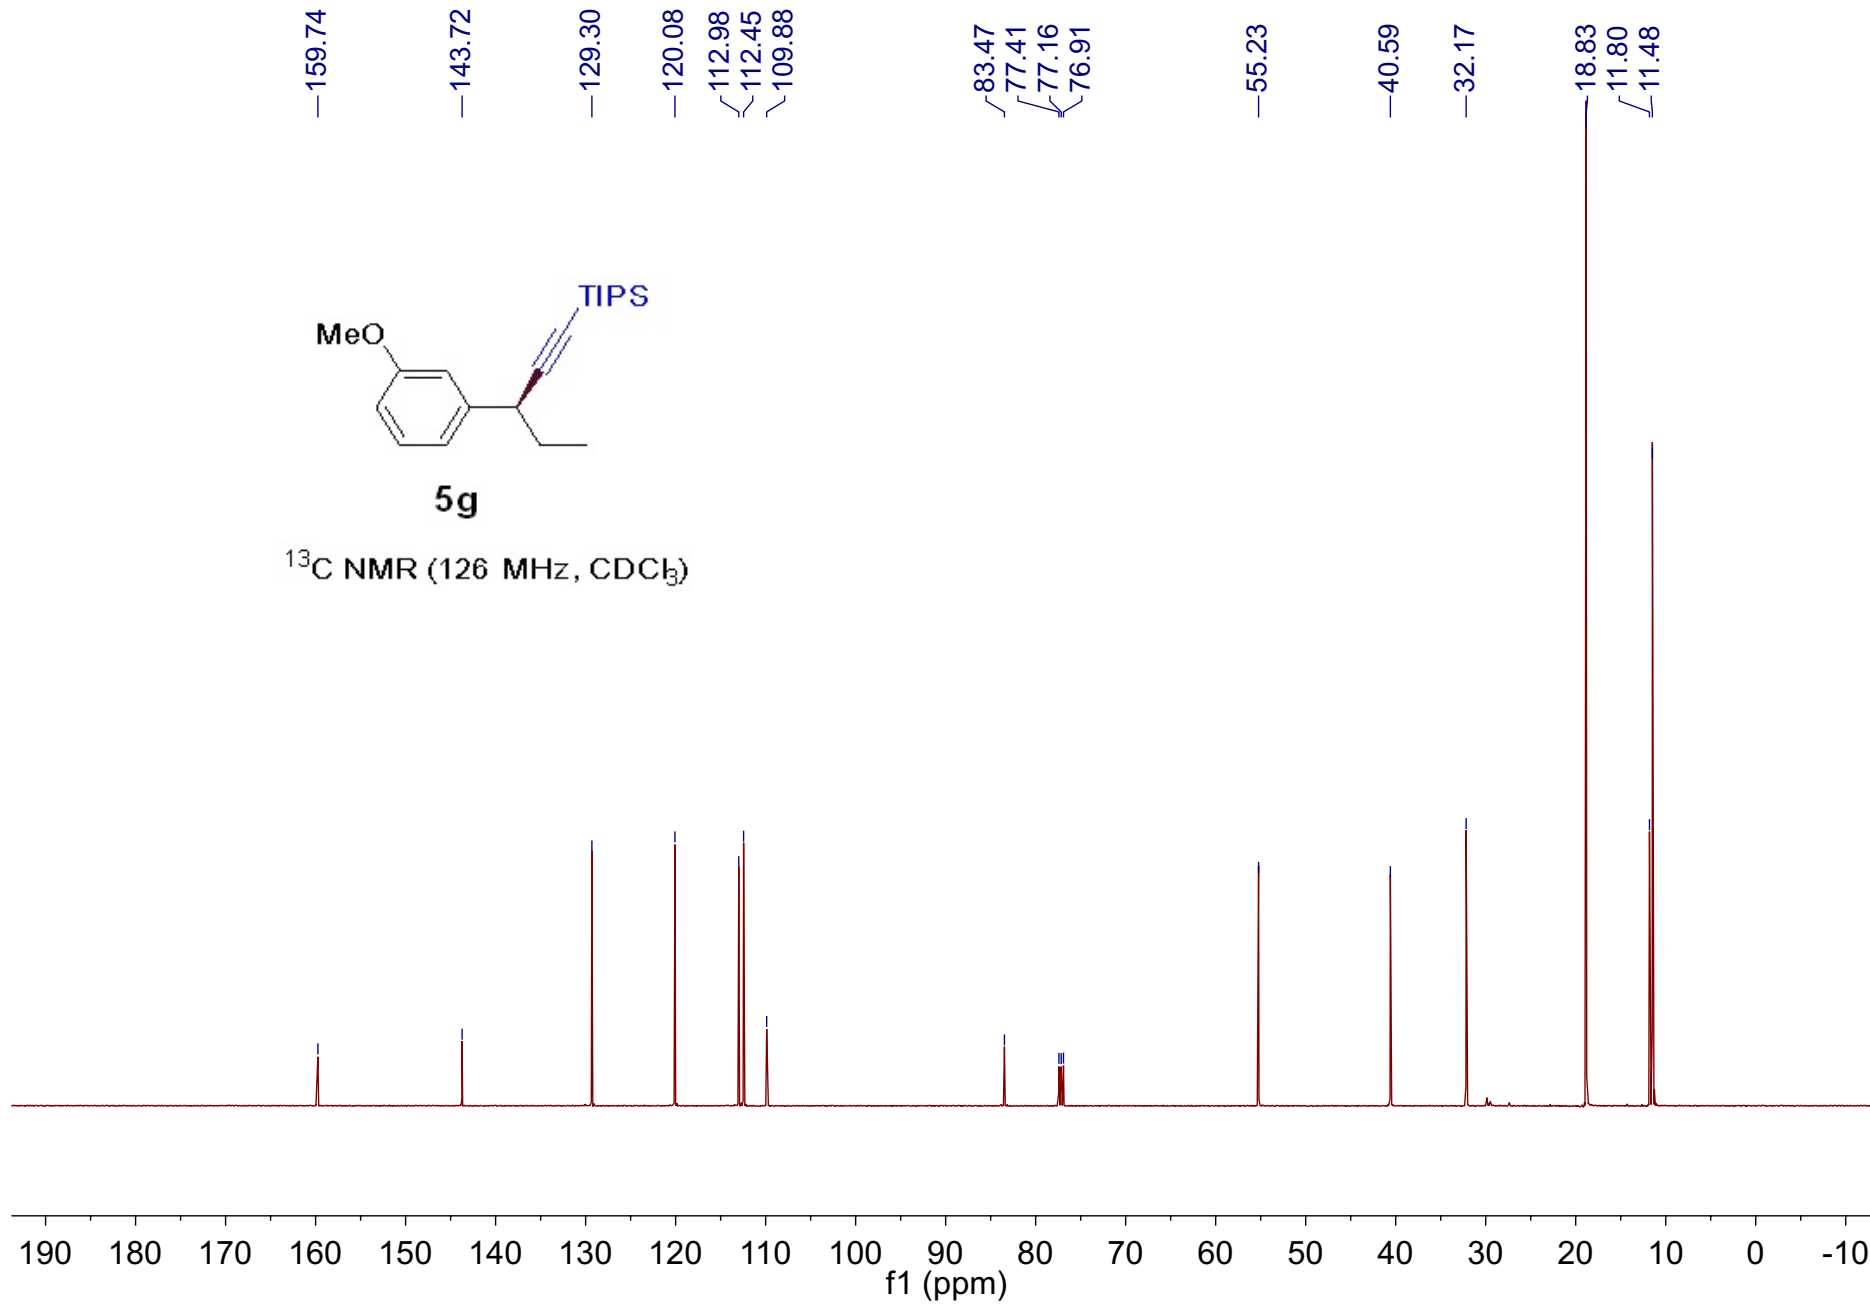

Supplementary Fig. 120.  $^{13}\text{C}$  NMR (126 MHz,  $\text{CDCl}_3$ ) spectra for compound **5g**

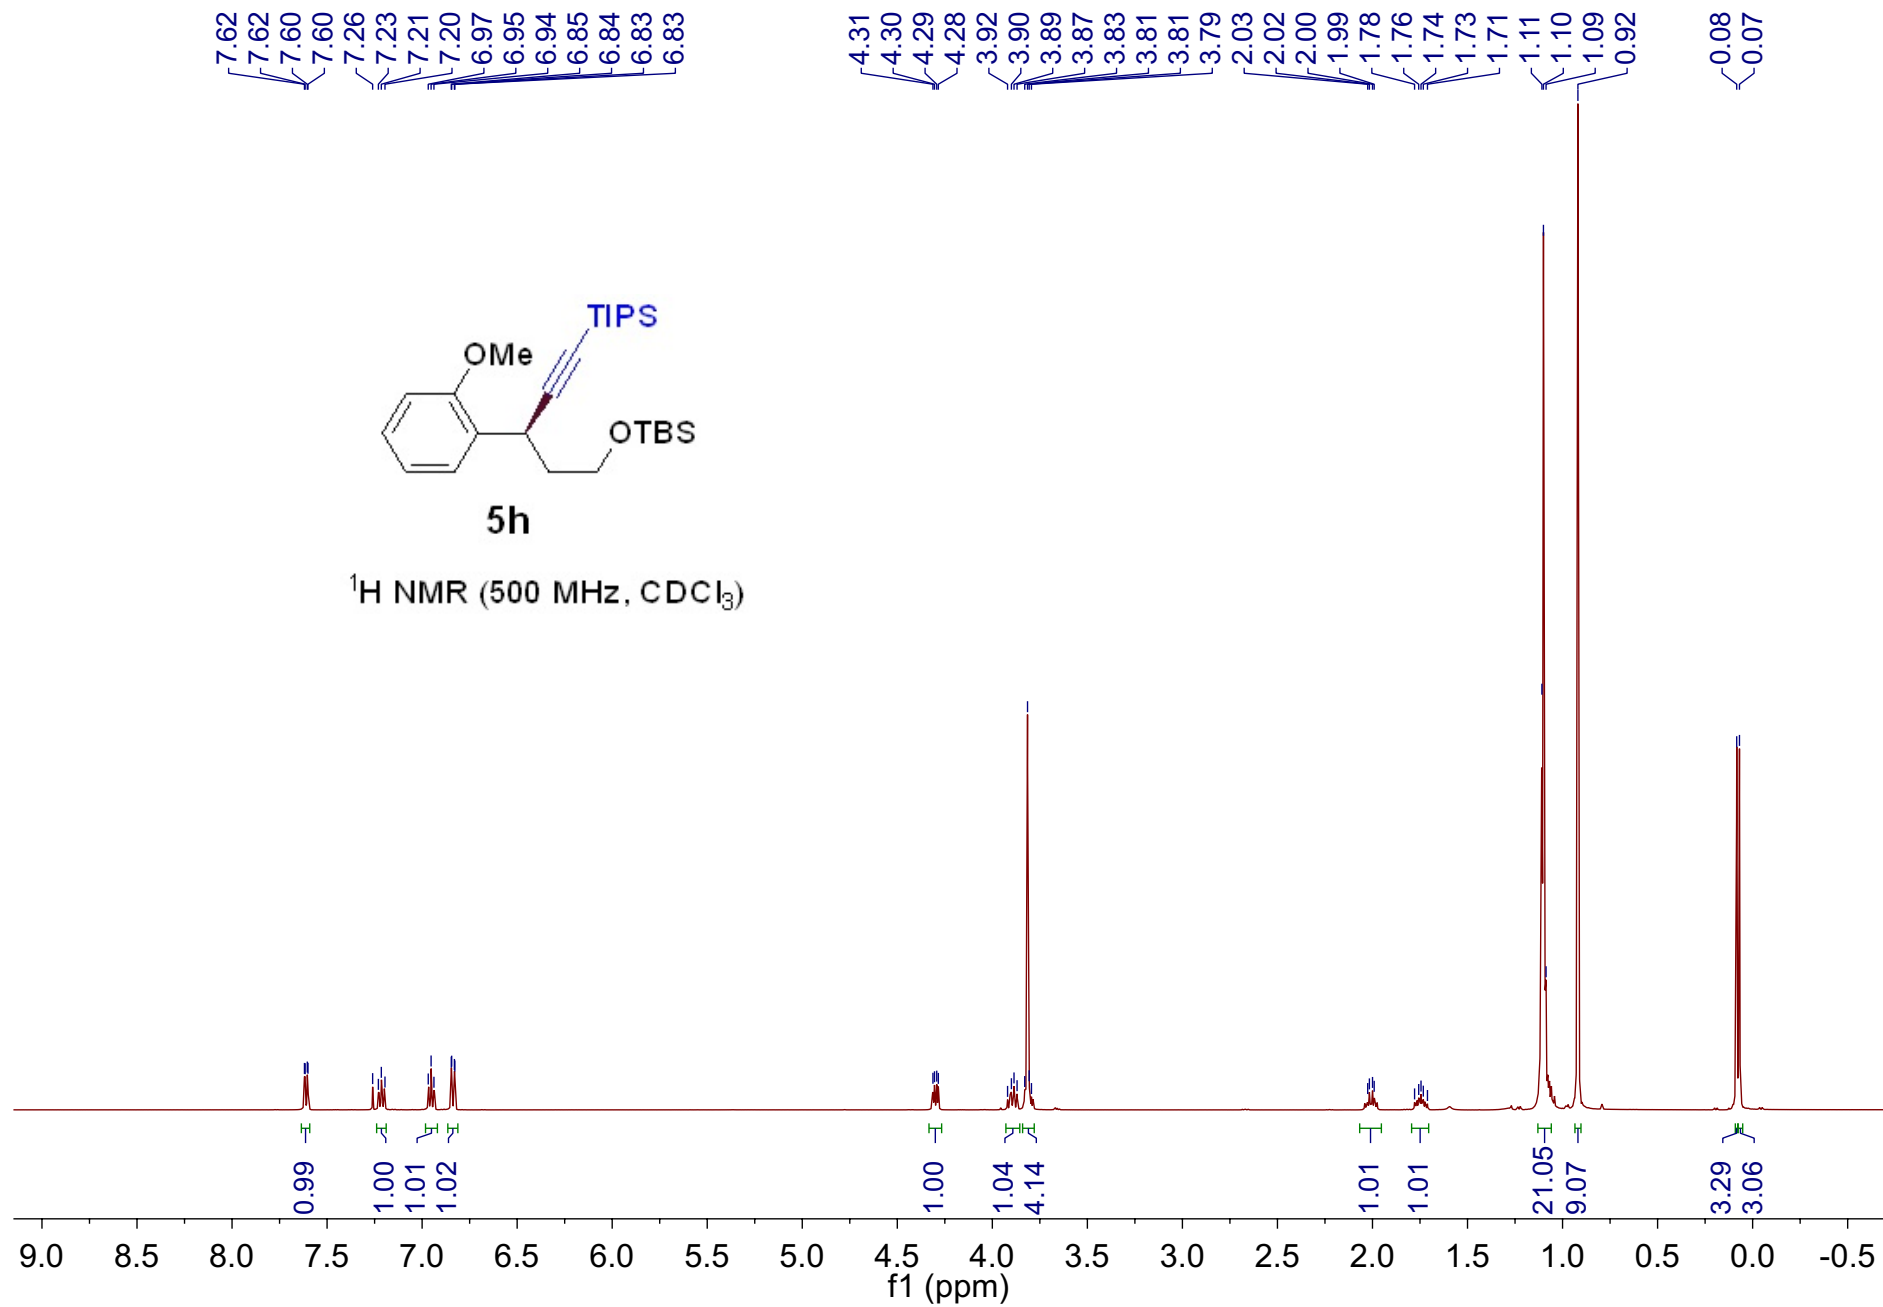

Supplementary Fig. 121. <sup>1</sup>H NMR (500 MHz, CDCl<sub>3</sub>) spectra for compound **5h**

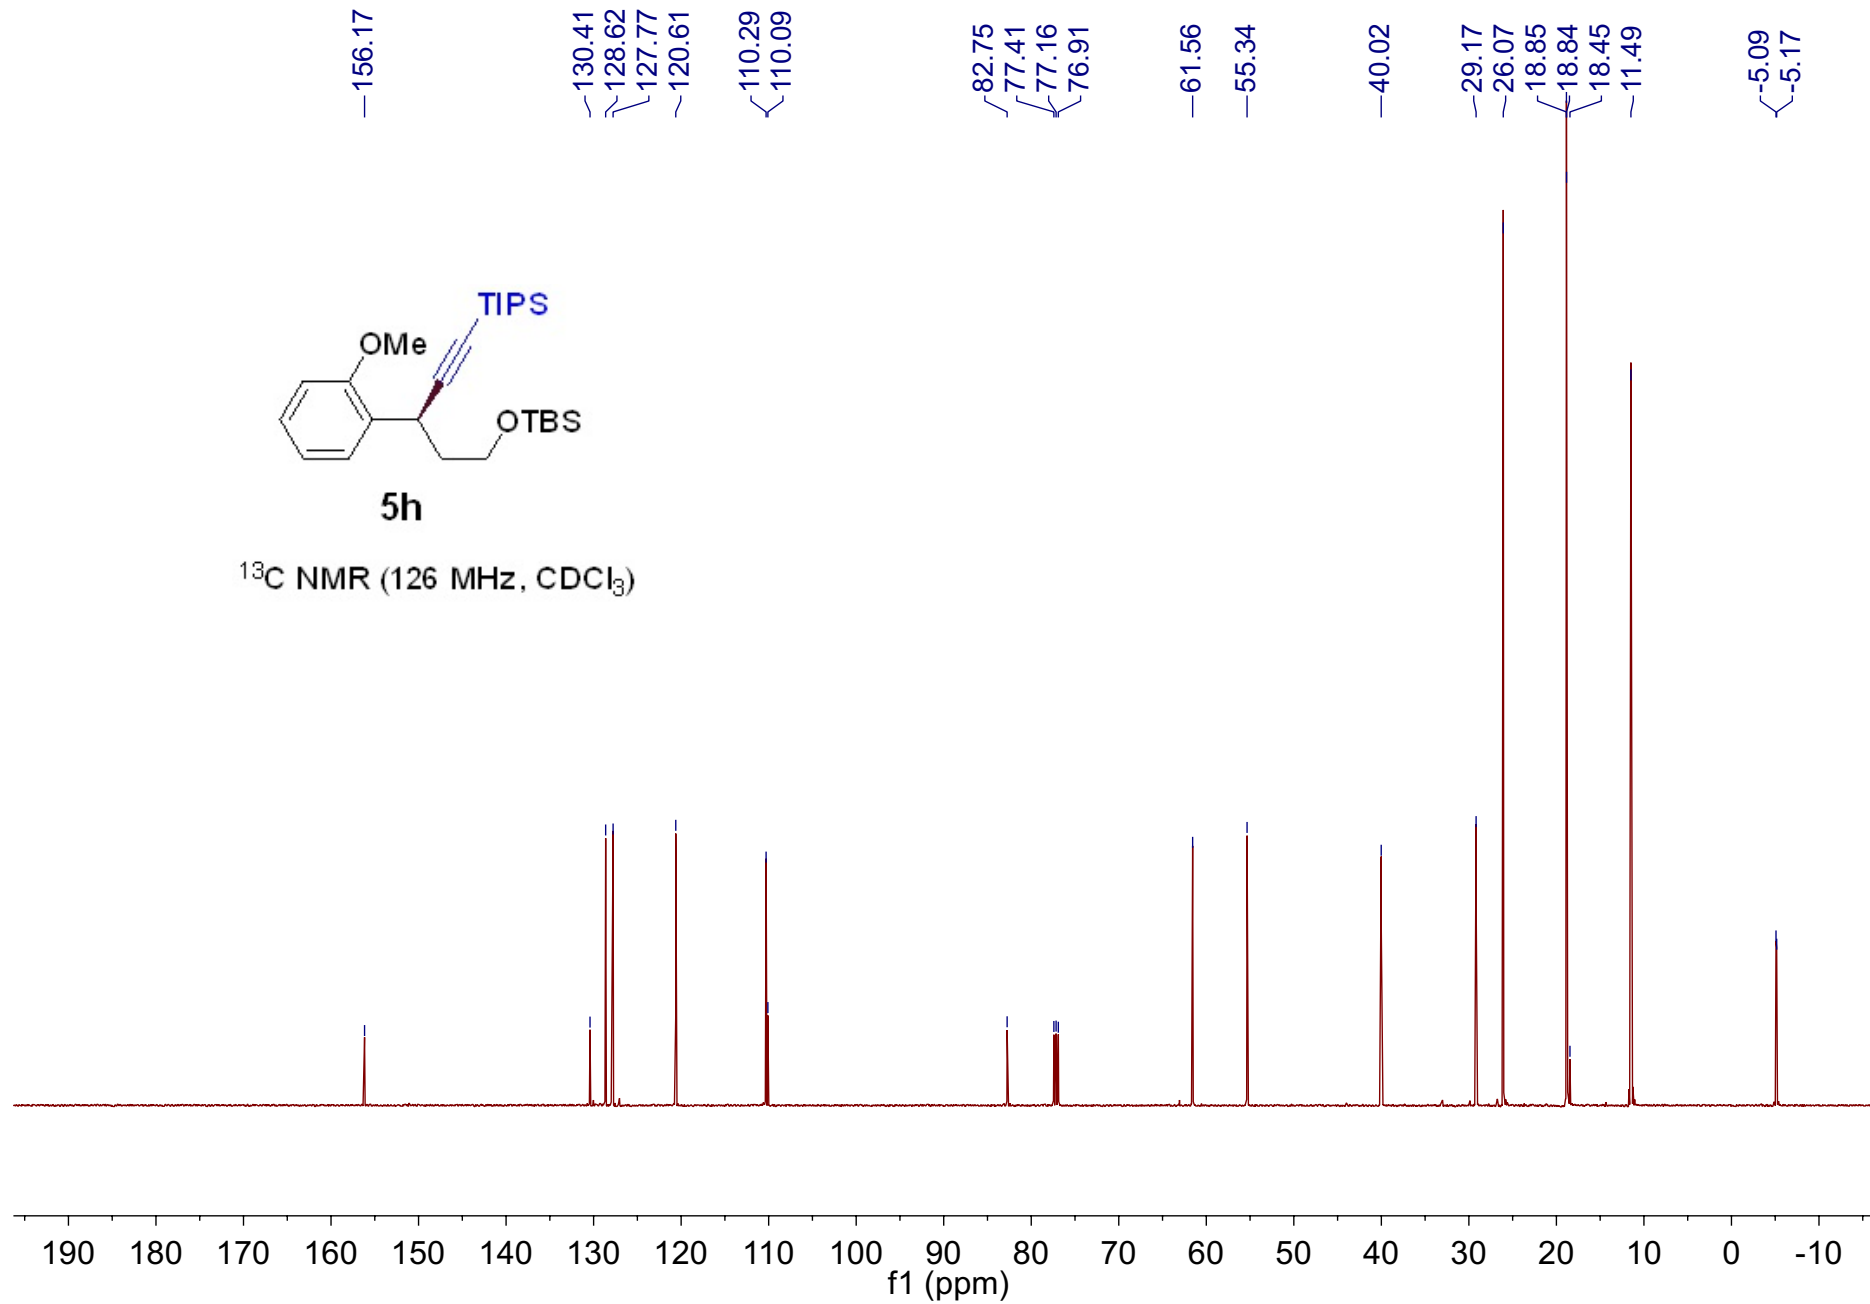

Supplementary Fig. 122.  $^{13}\text{C}$  NMR (126 MHz,  $\text{CDCl}_3$ ) spectra for compound **5h**

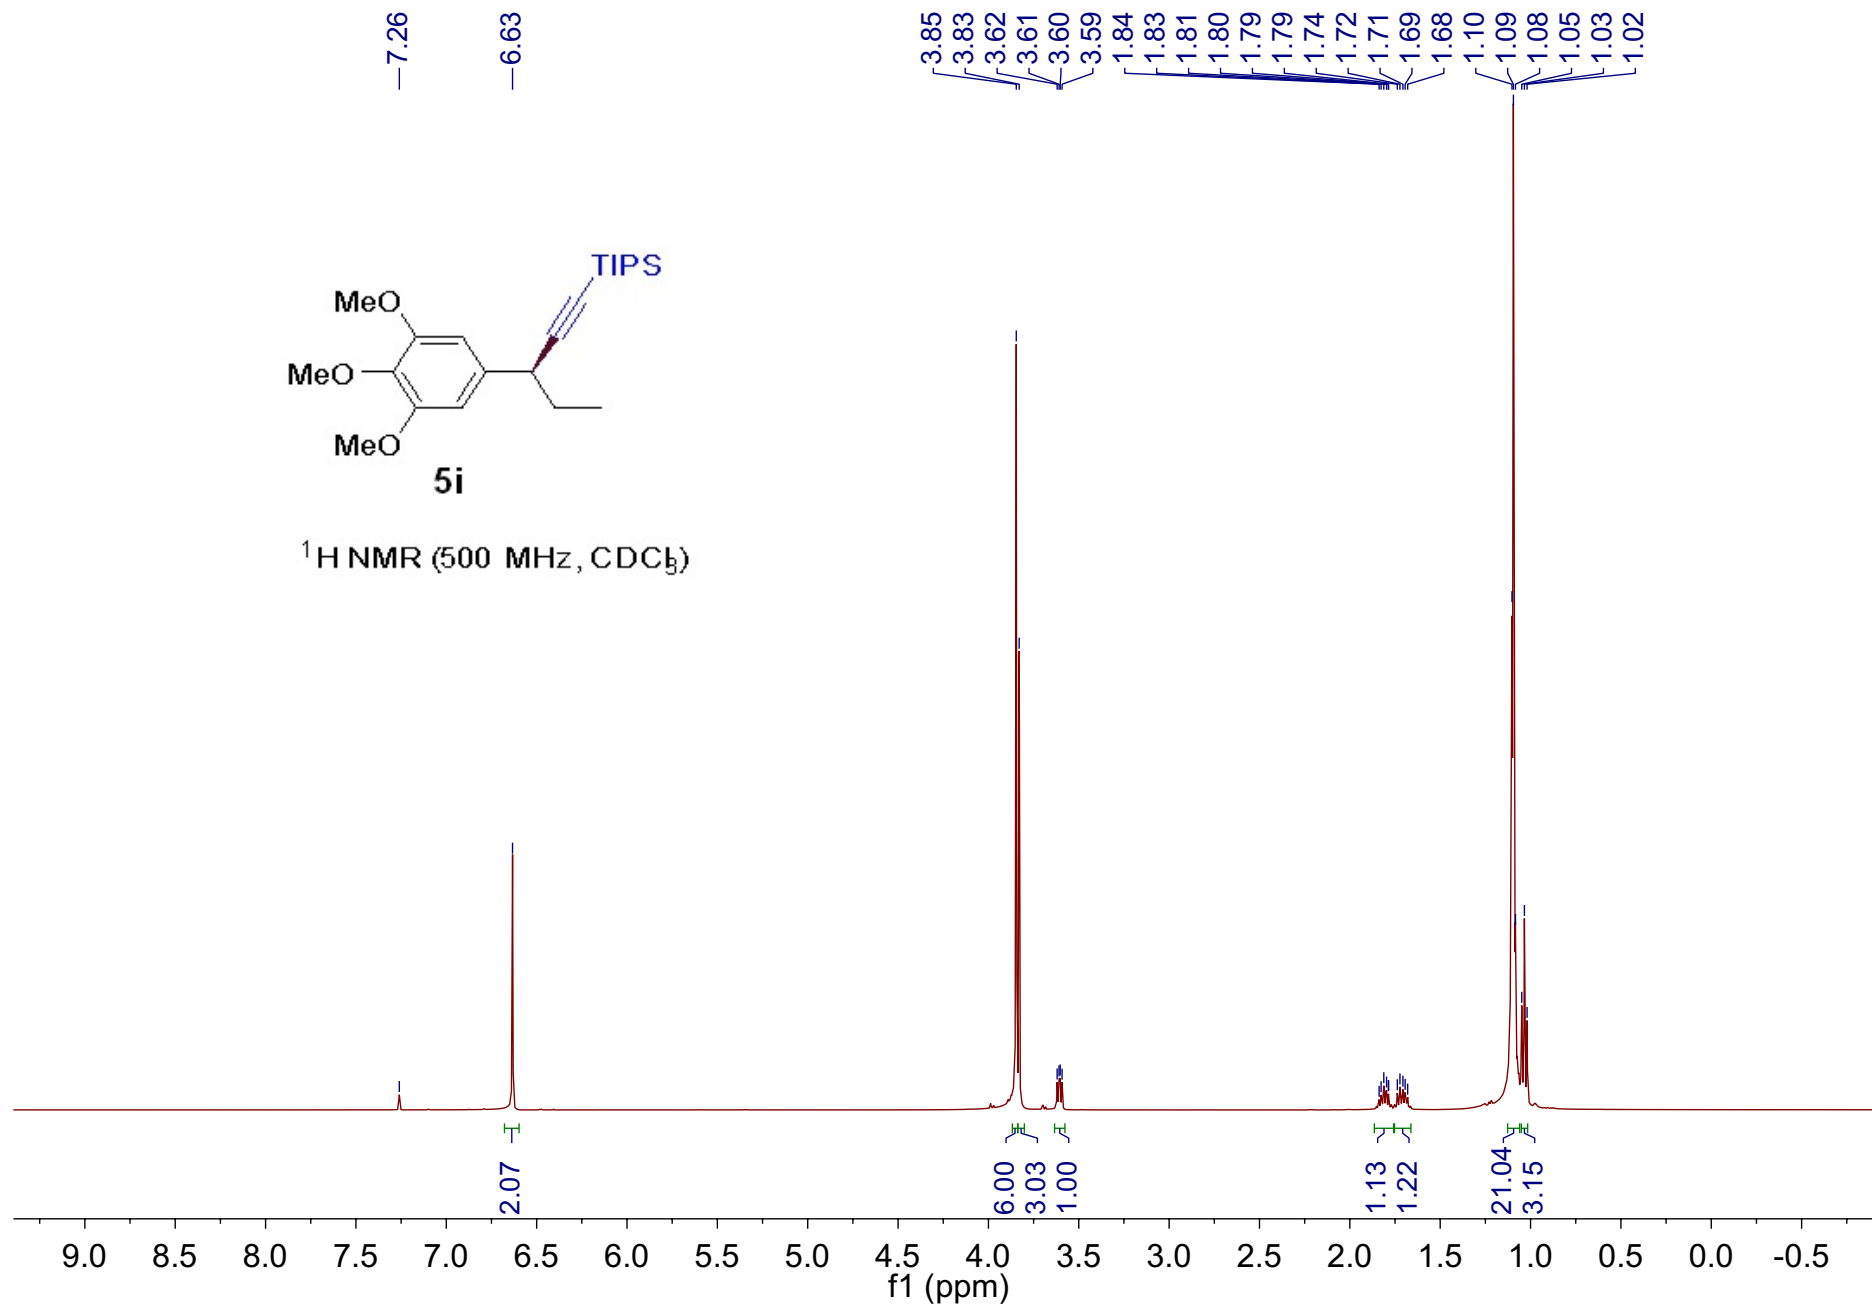

Supplementary Fig. 123.  $^1\text{H NMR}$  (500 MHz,  $\text{CDCl}_3$ ) spectra for compound **5i**

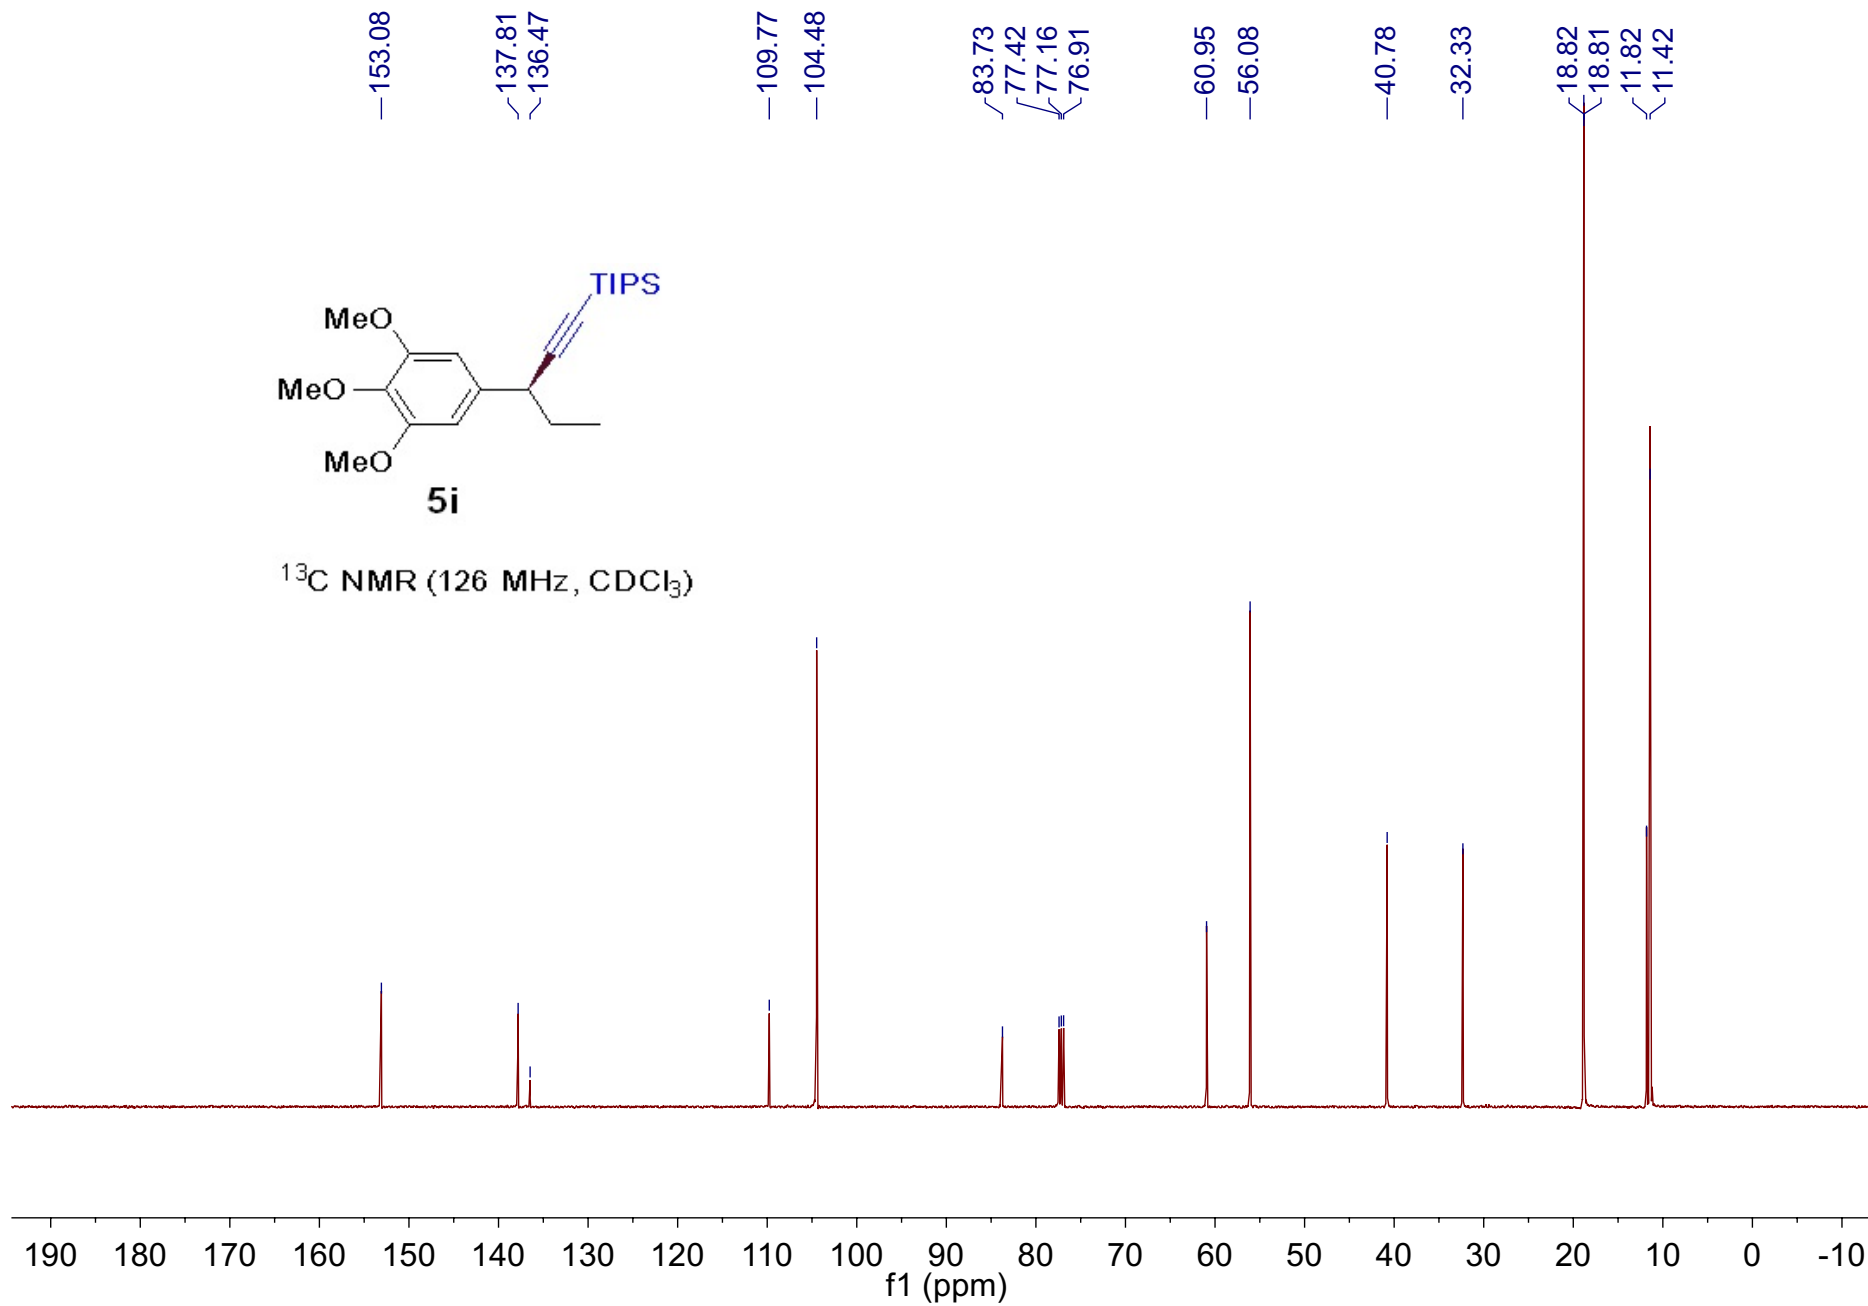

**Supplementary Fig. 124.** <sup>13</sup>C NMR (126 MHz, CDCl<sub>3</sub>) spectra for compound **5i**



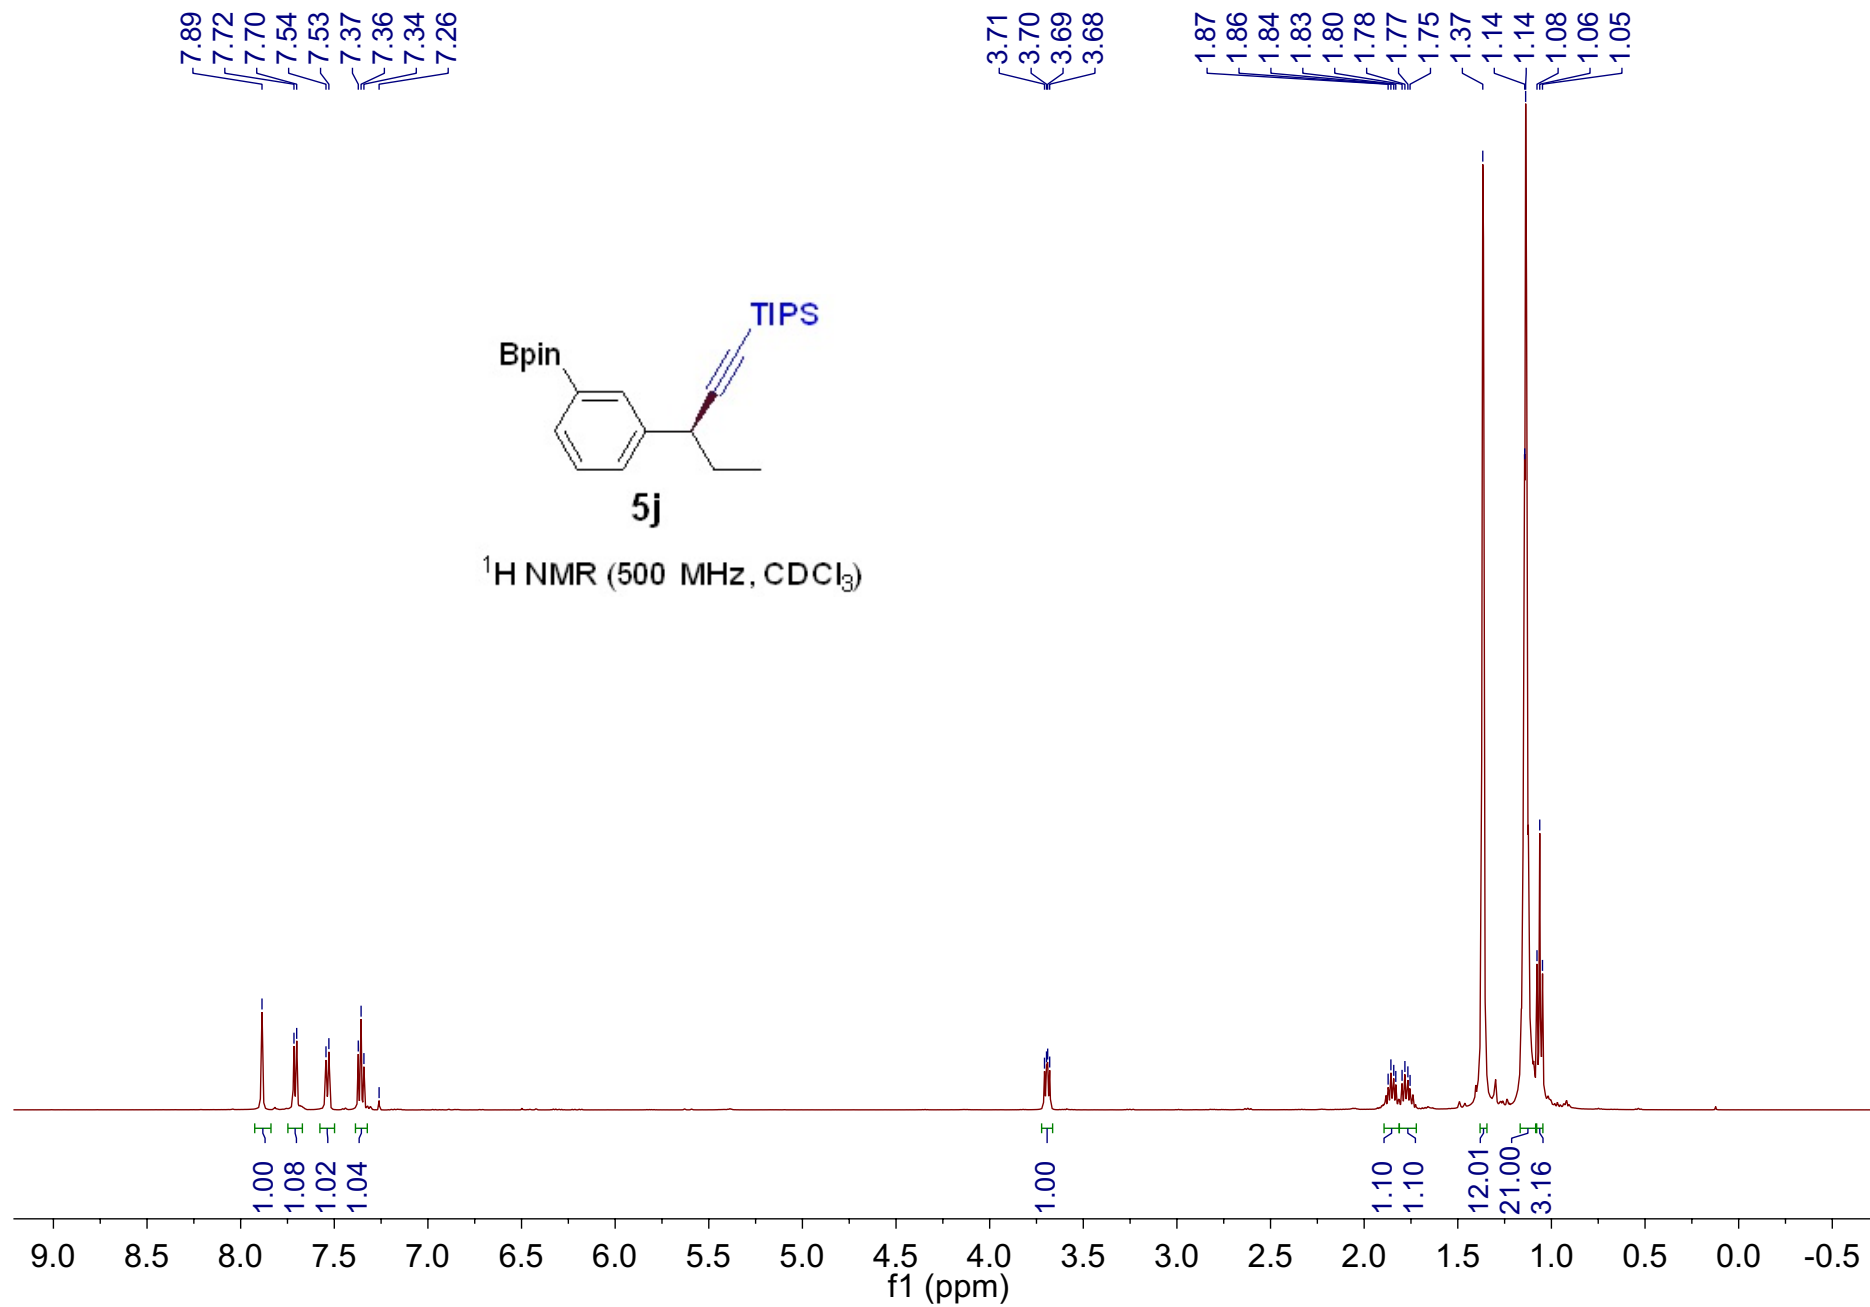

Supplementary Fig. 125. <sup>1</sup>H NMR (500 MHz, CDCl<sub>3</sub>) spectra for compound **5j**

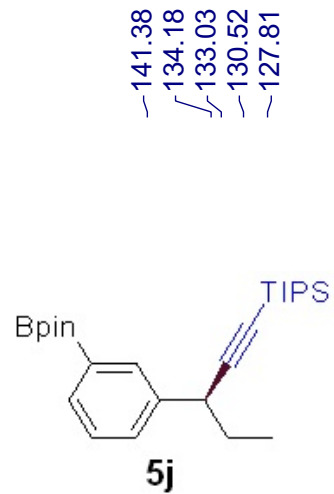

$^{13}\text{C}$  NMR (126 MHz,  $\text{CDCl}_3$ )

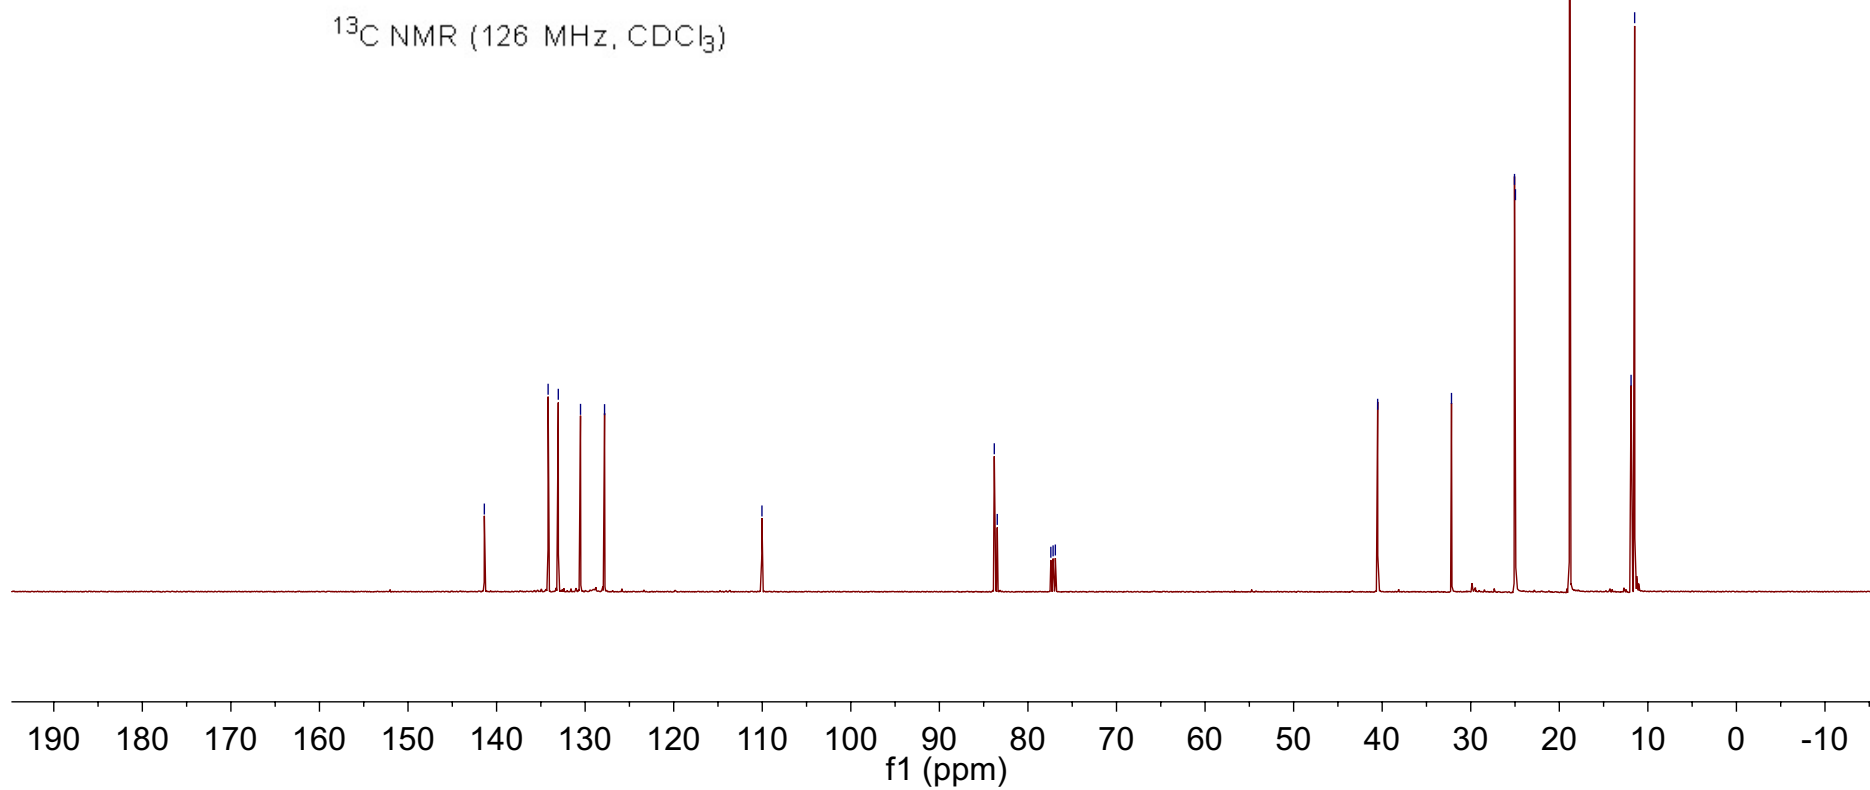

**Supplementary Fig. 126.**  $^{13}\text{C}$  NMR (126 MHz,  $\text{CDCl}_3$ ) spectra for compound **5j**

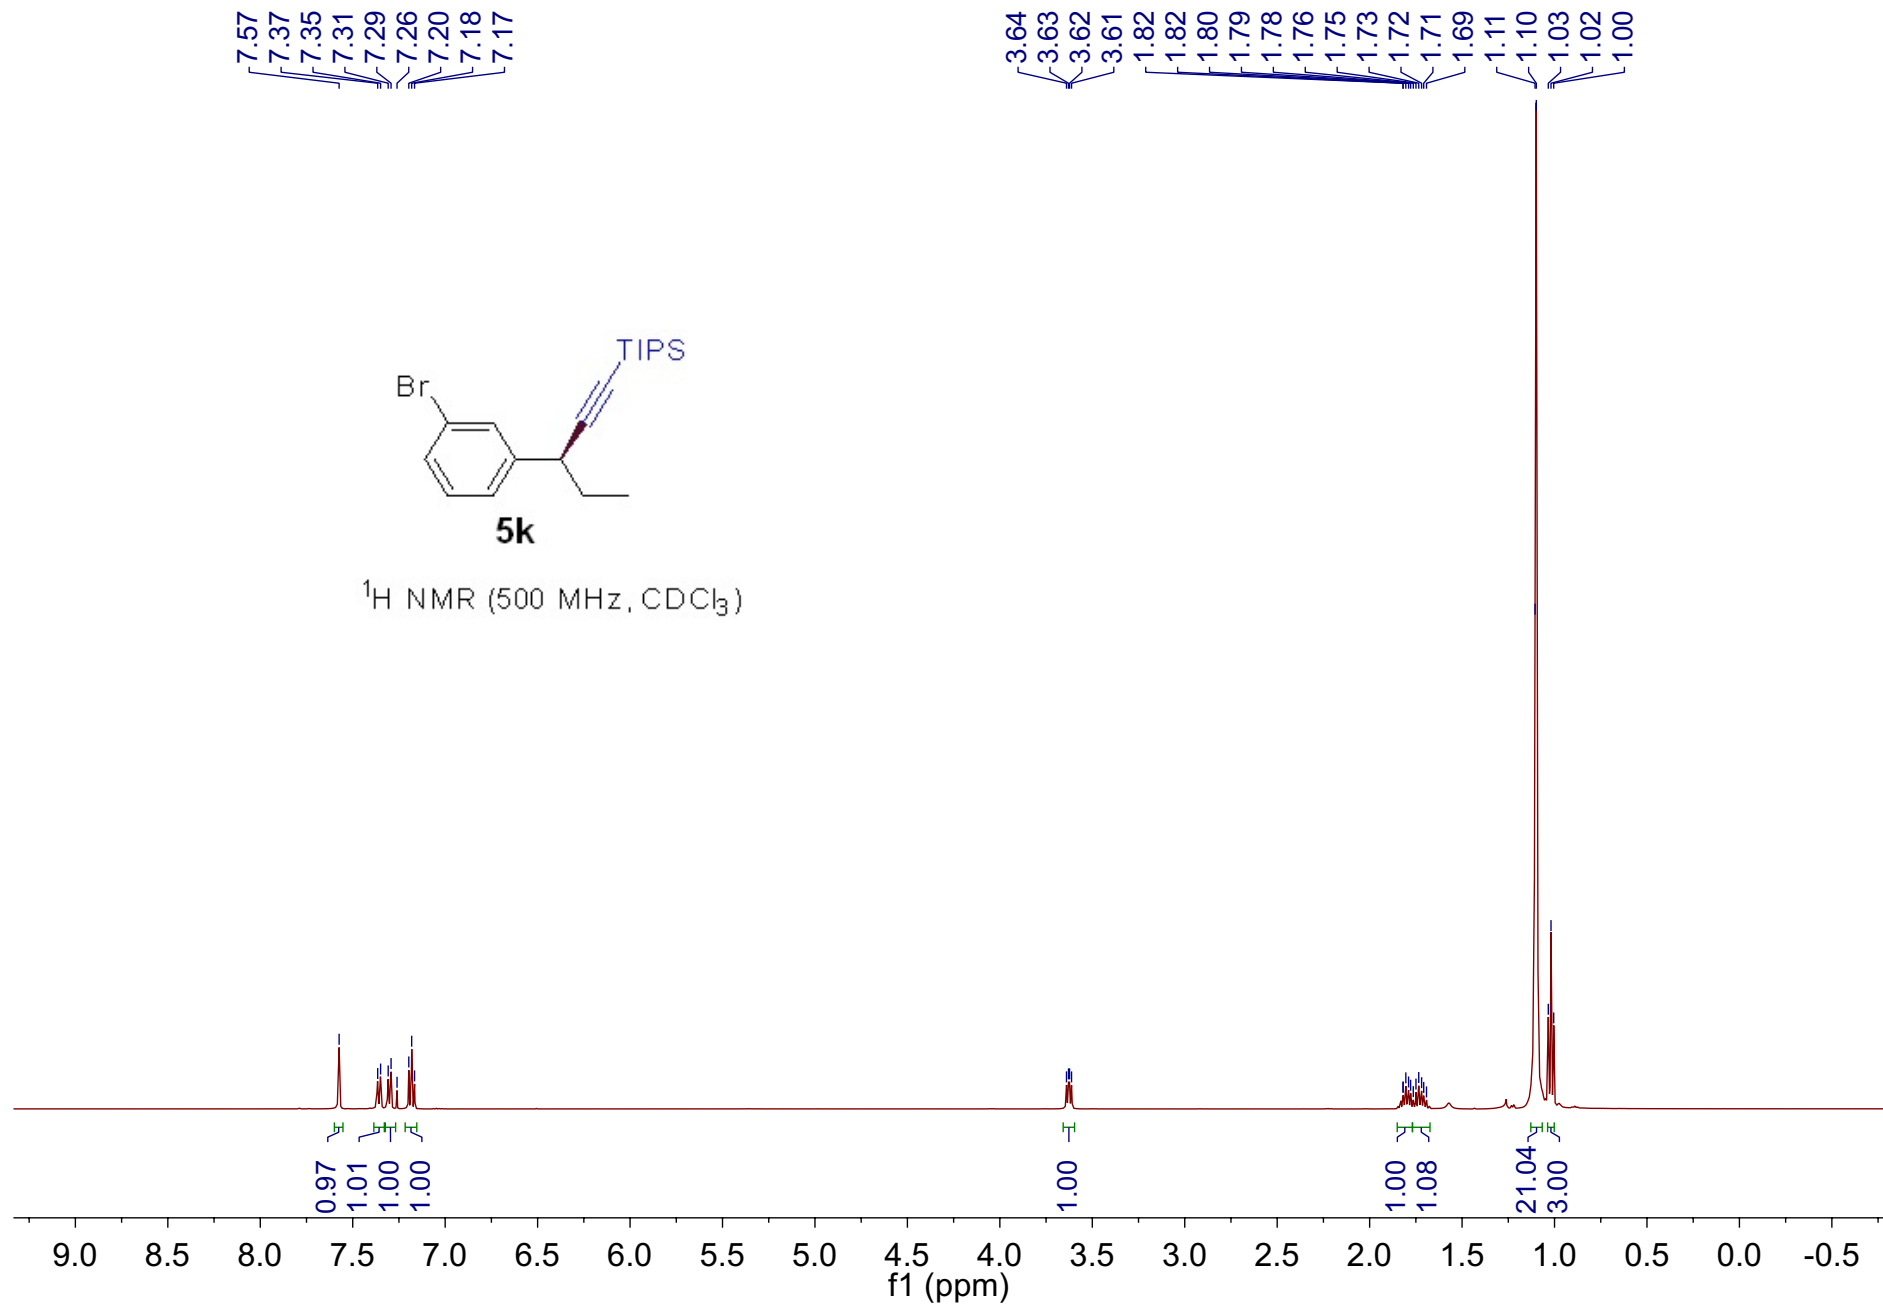

Supplementary Fig. 127. <sup>1</sup>H NMR (500 MHz, CDCl<sub>3</sub>) spectra for compound **5k**

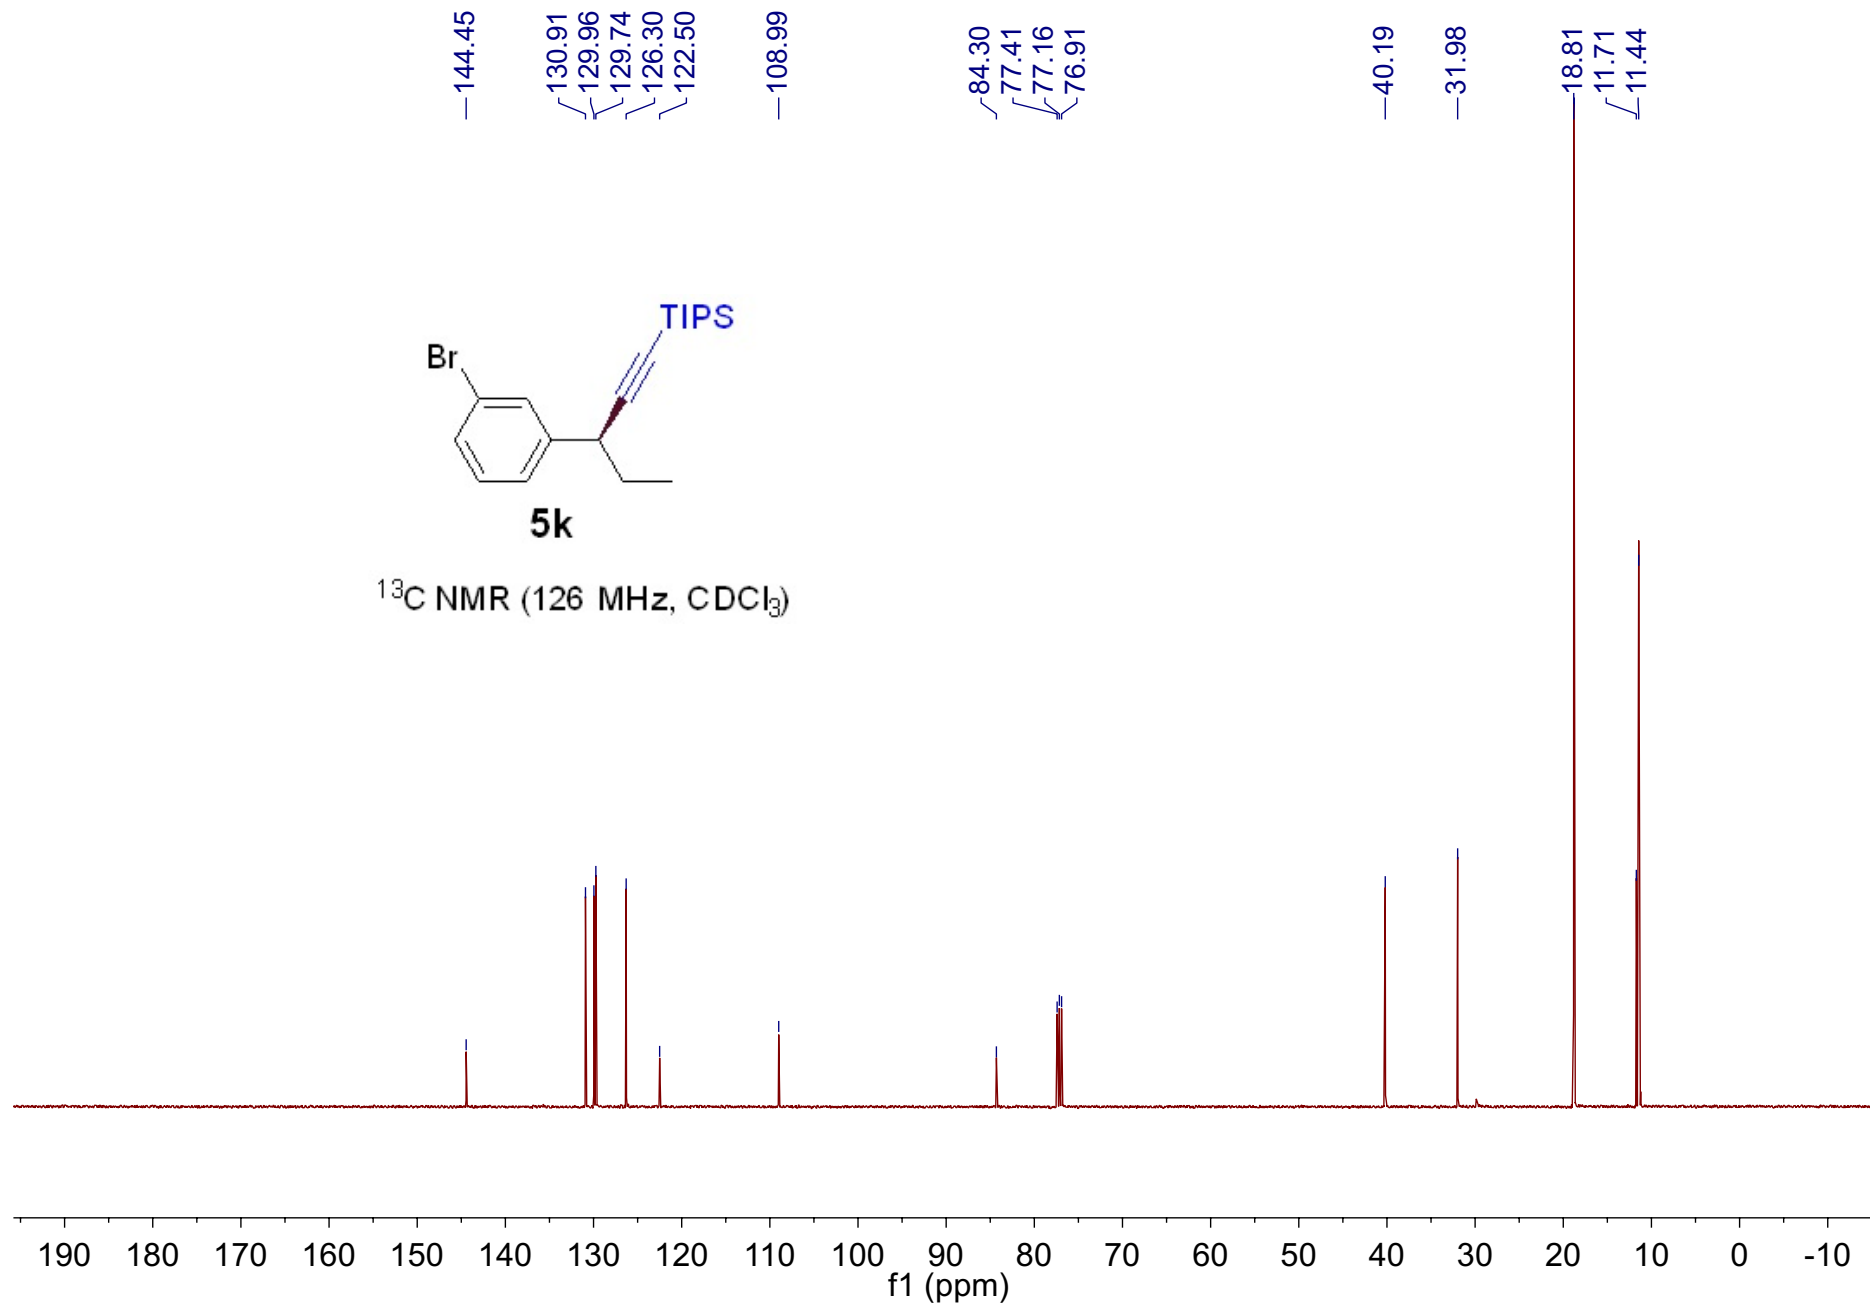

Supplementary Fig. 128.  $^{13}\text{C}$  NMR (126 MHz,  $\text{CDCl}_3$ ) spectra for compound **5k**

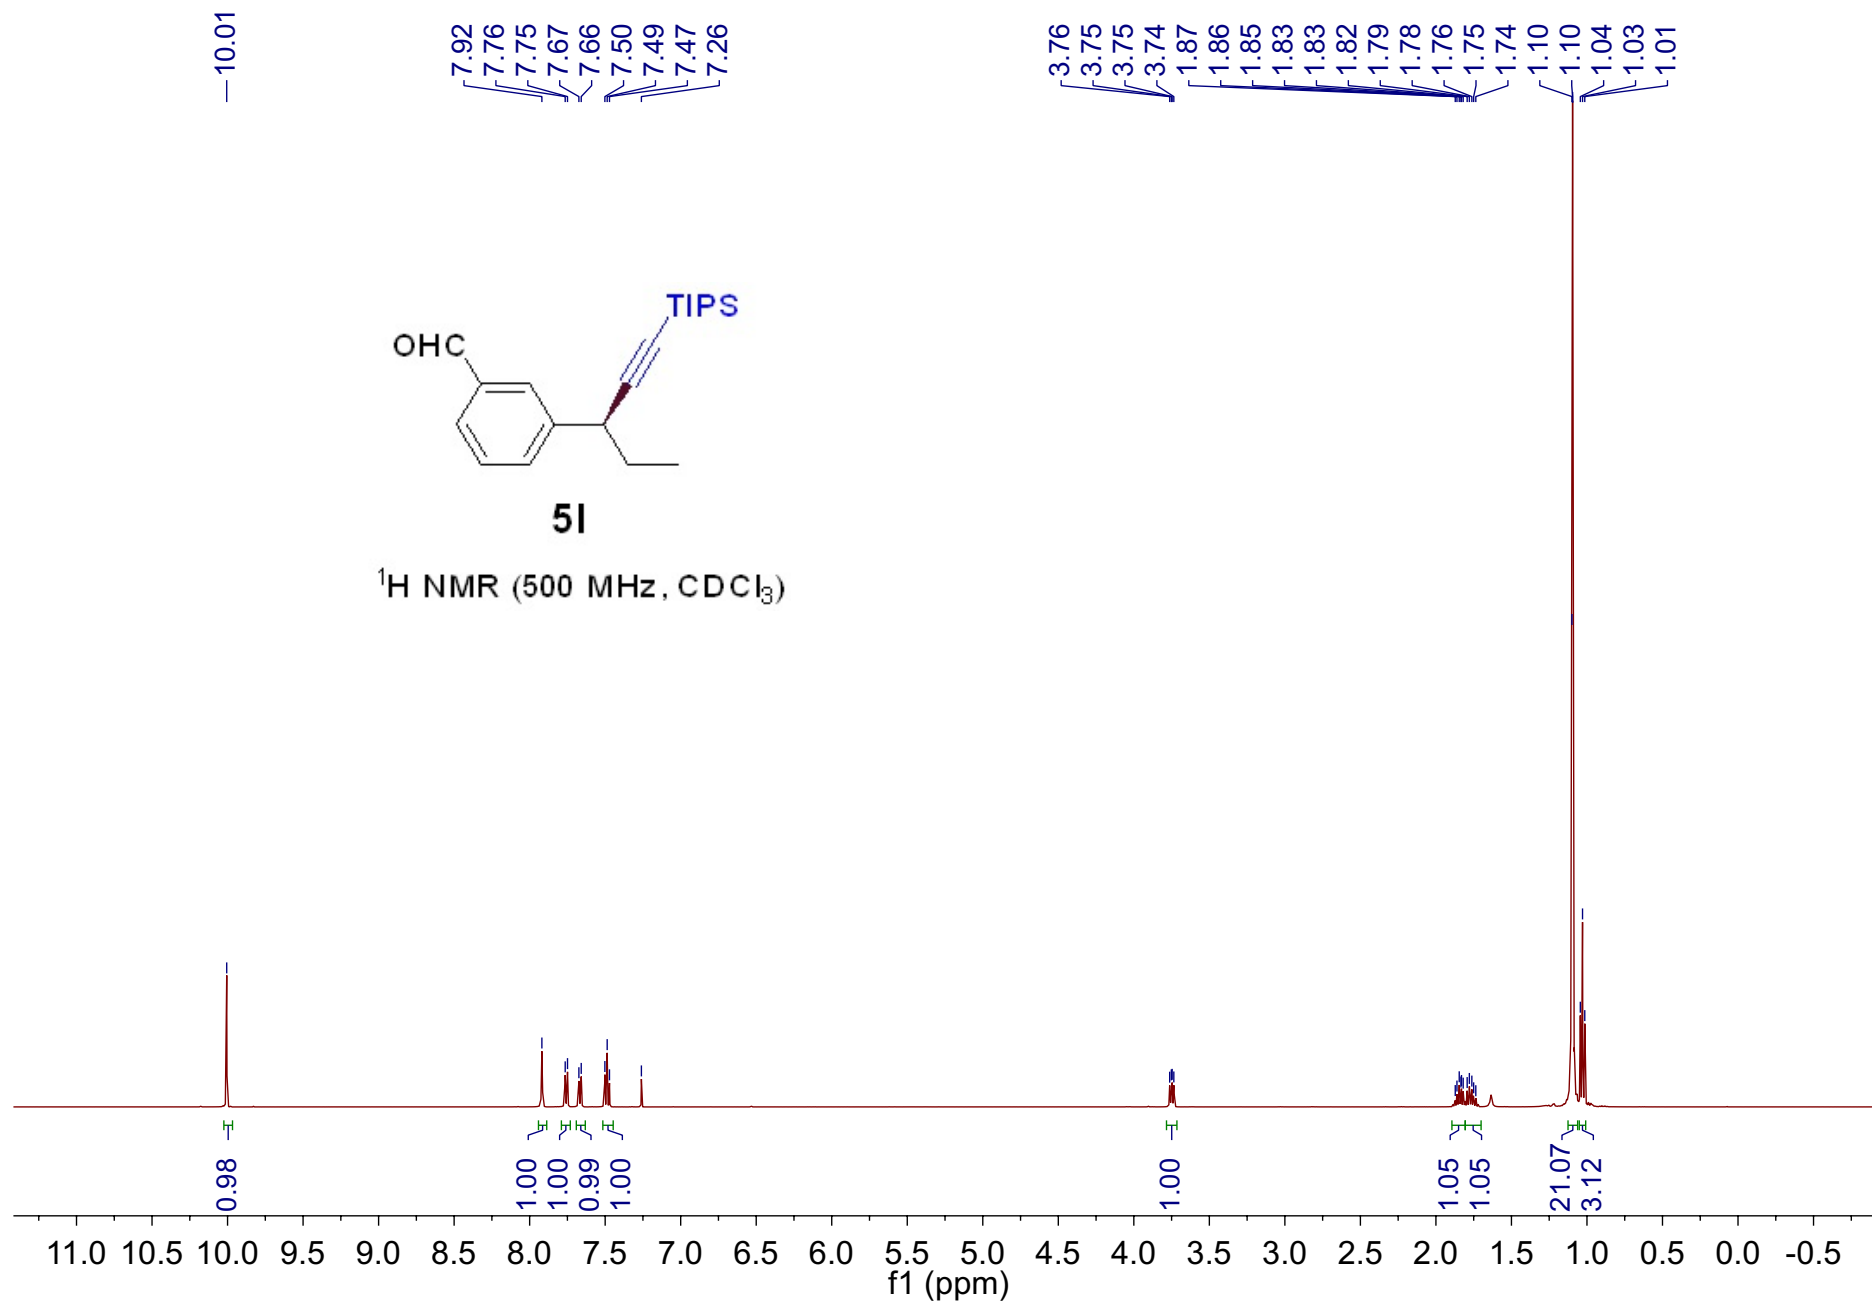

Supplementary Fig. 129.  $^1\text{H}$  NMR (500 MHz,  $\text{CDCl}_3$ ) spectra for compound **5l**

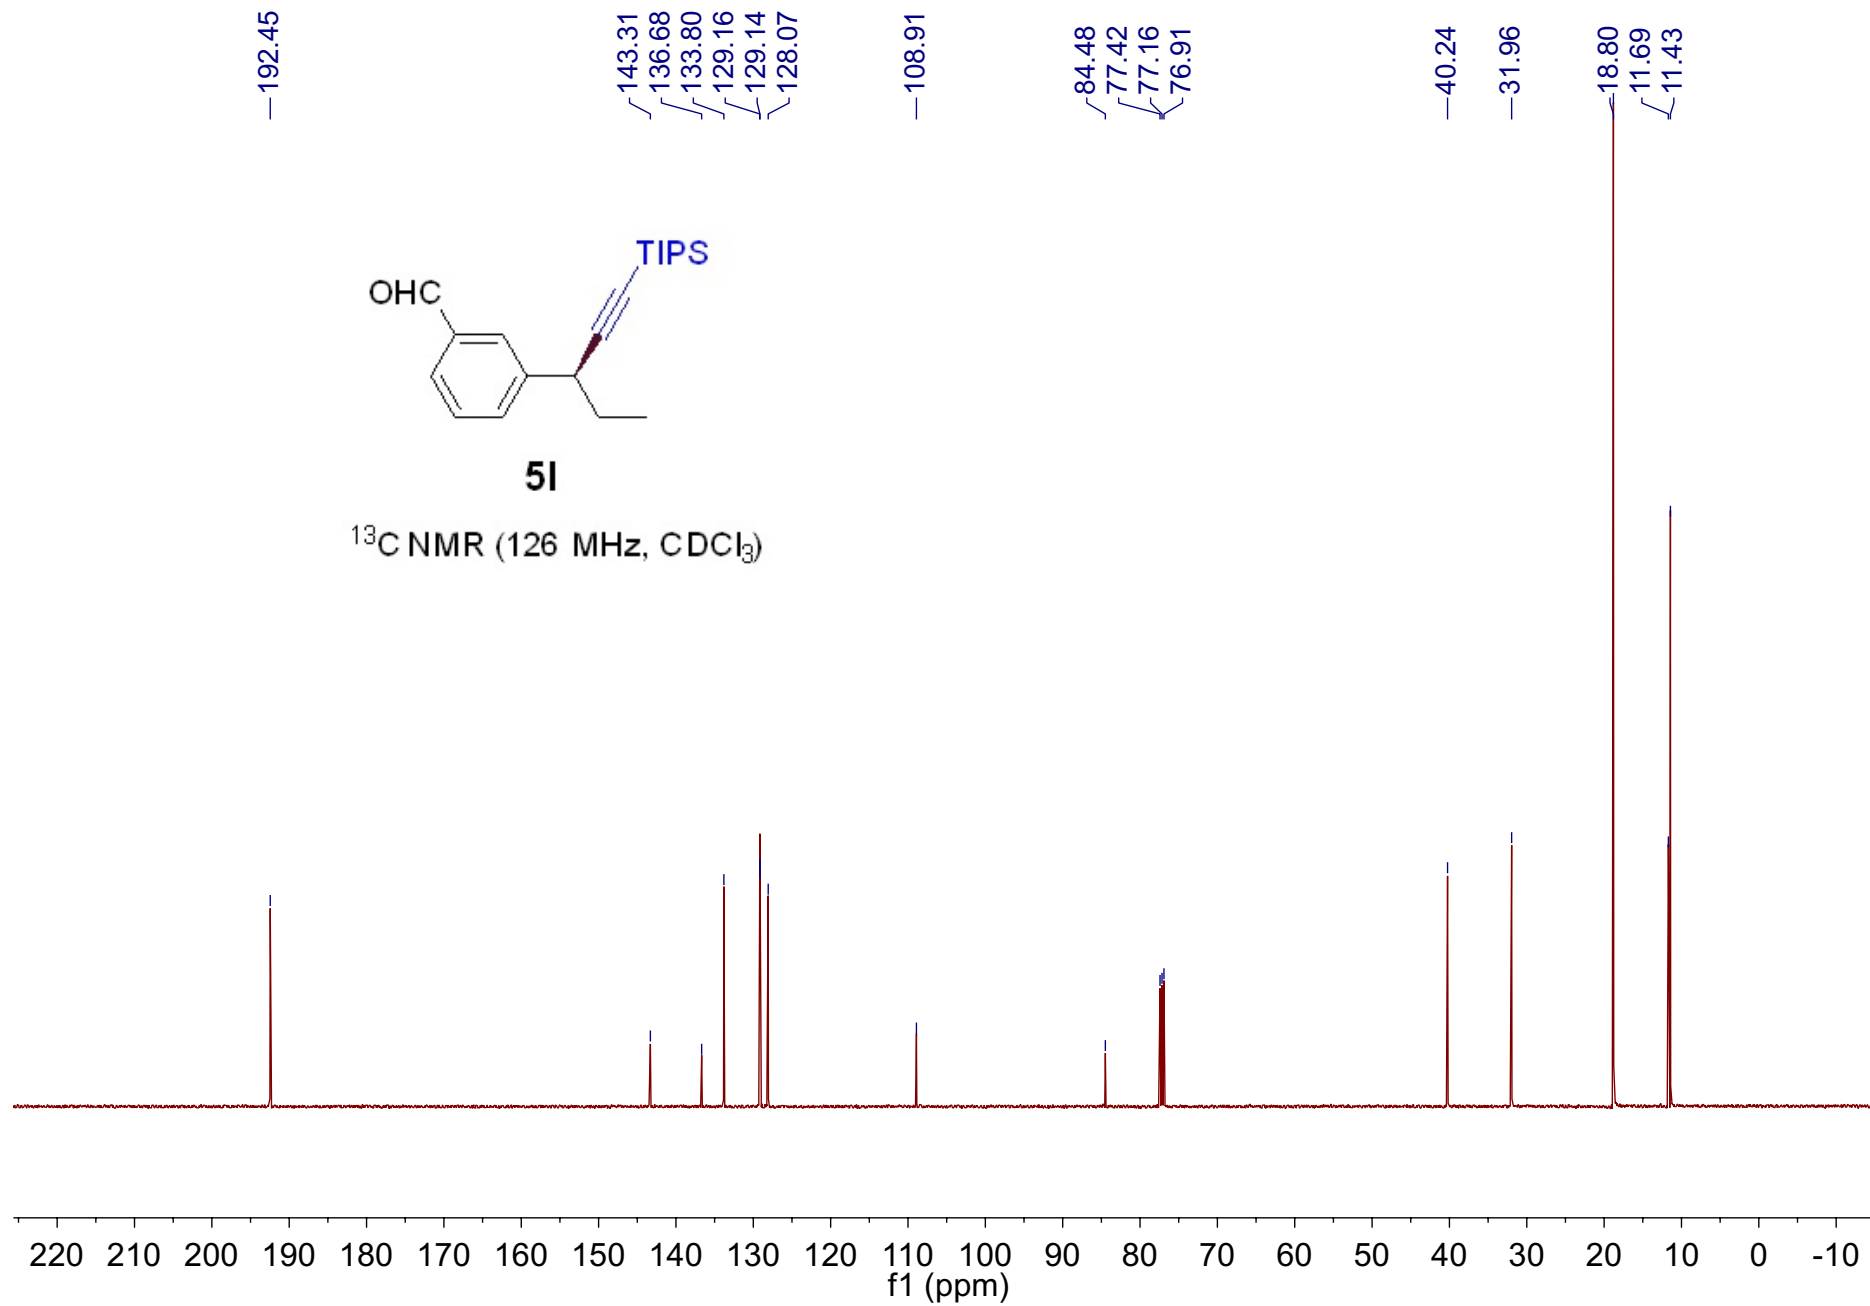

Supplementary Fig. 130.  $^{13}\text{C}$  NMR (126 MHz,  $\text{CDCl}_3$ ) spectra for compound **5I**

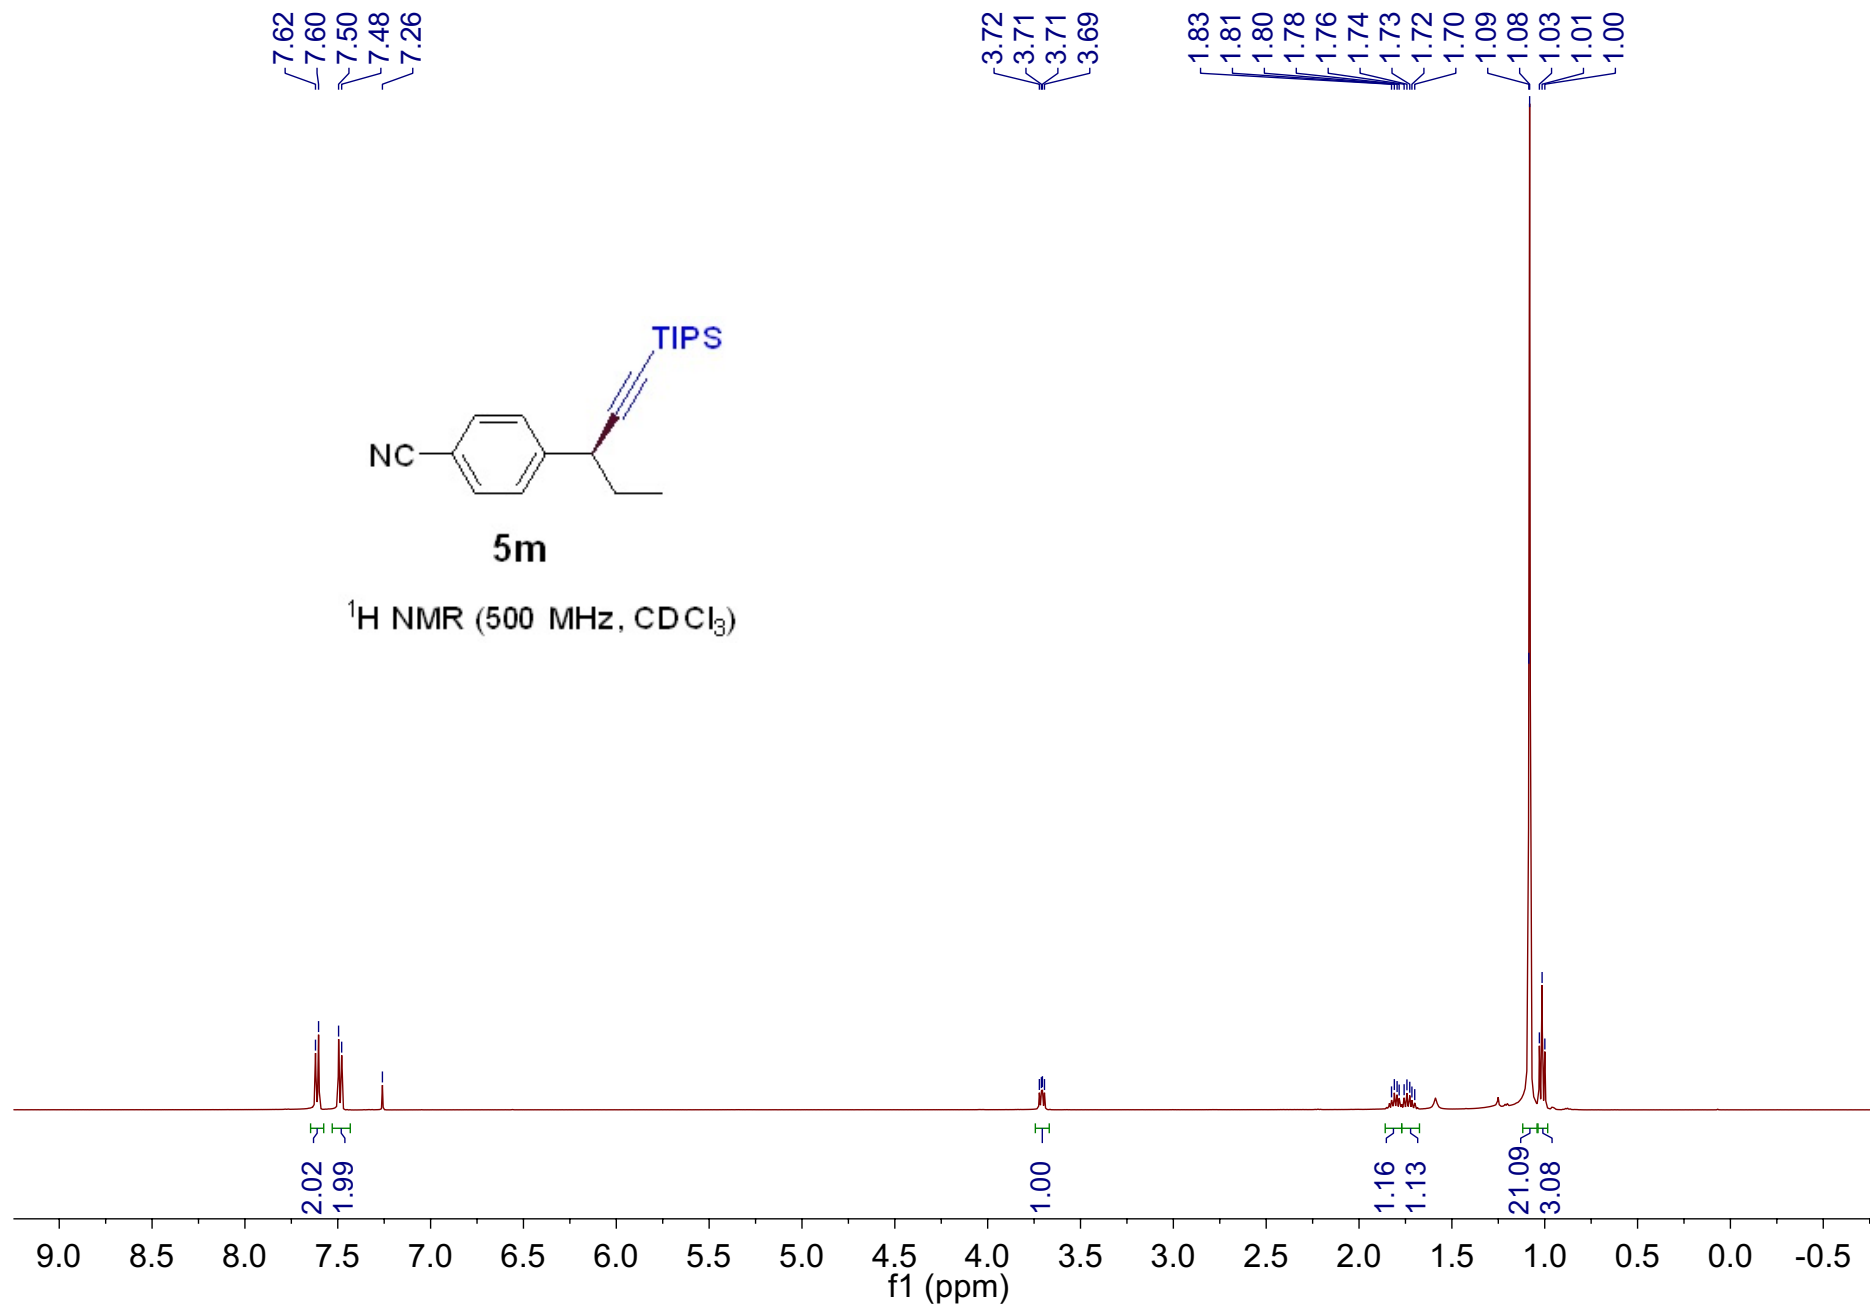

Supplementary Fig. 131.  $^1\text{H NMR}$  (500 MHz,  $\text{CDCl}_3$ ) spectra for compound **5m**

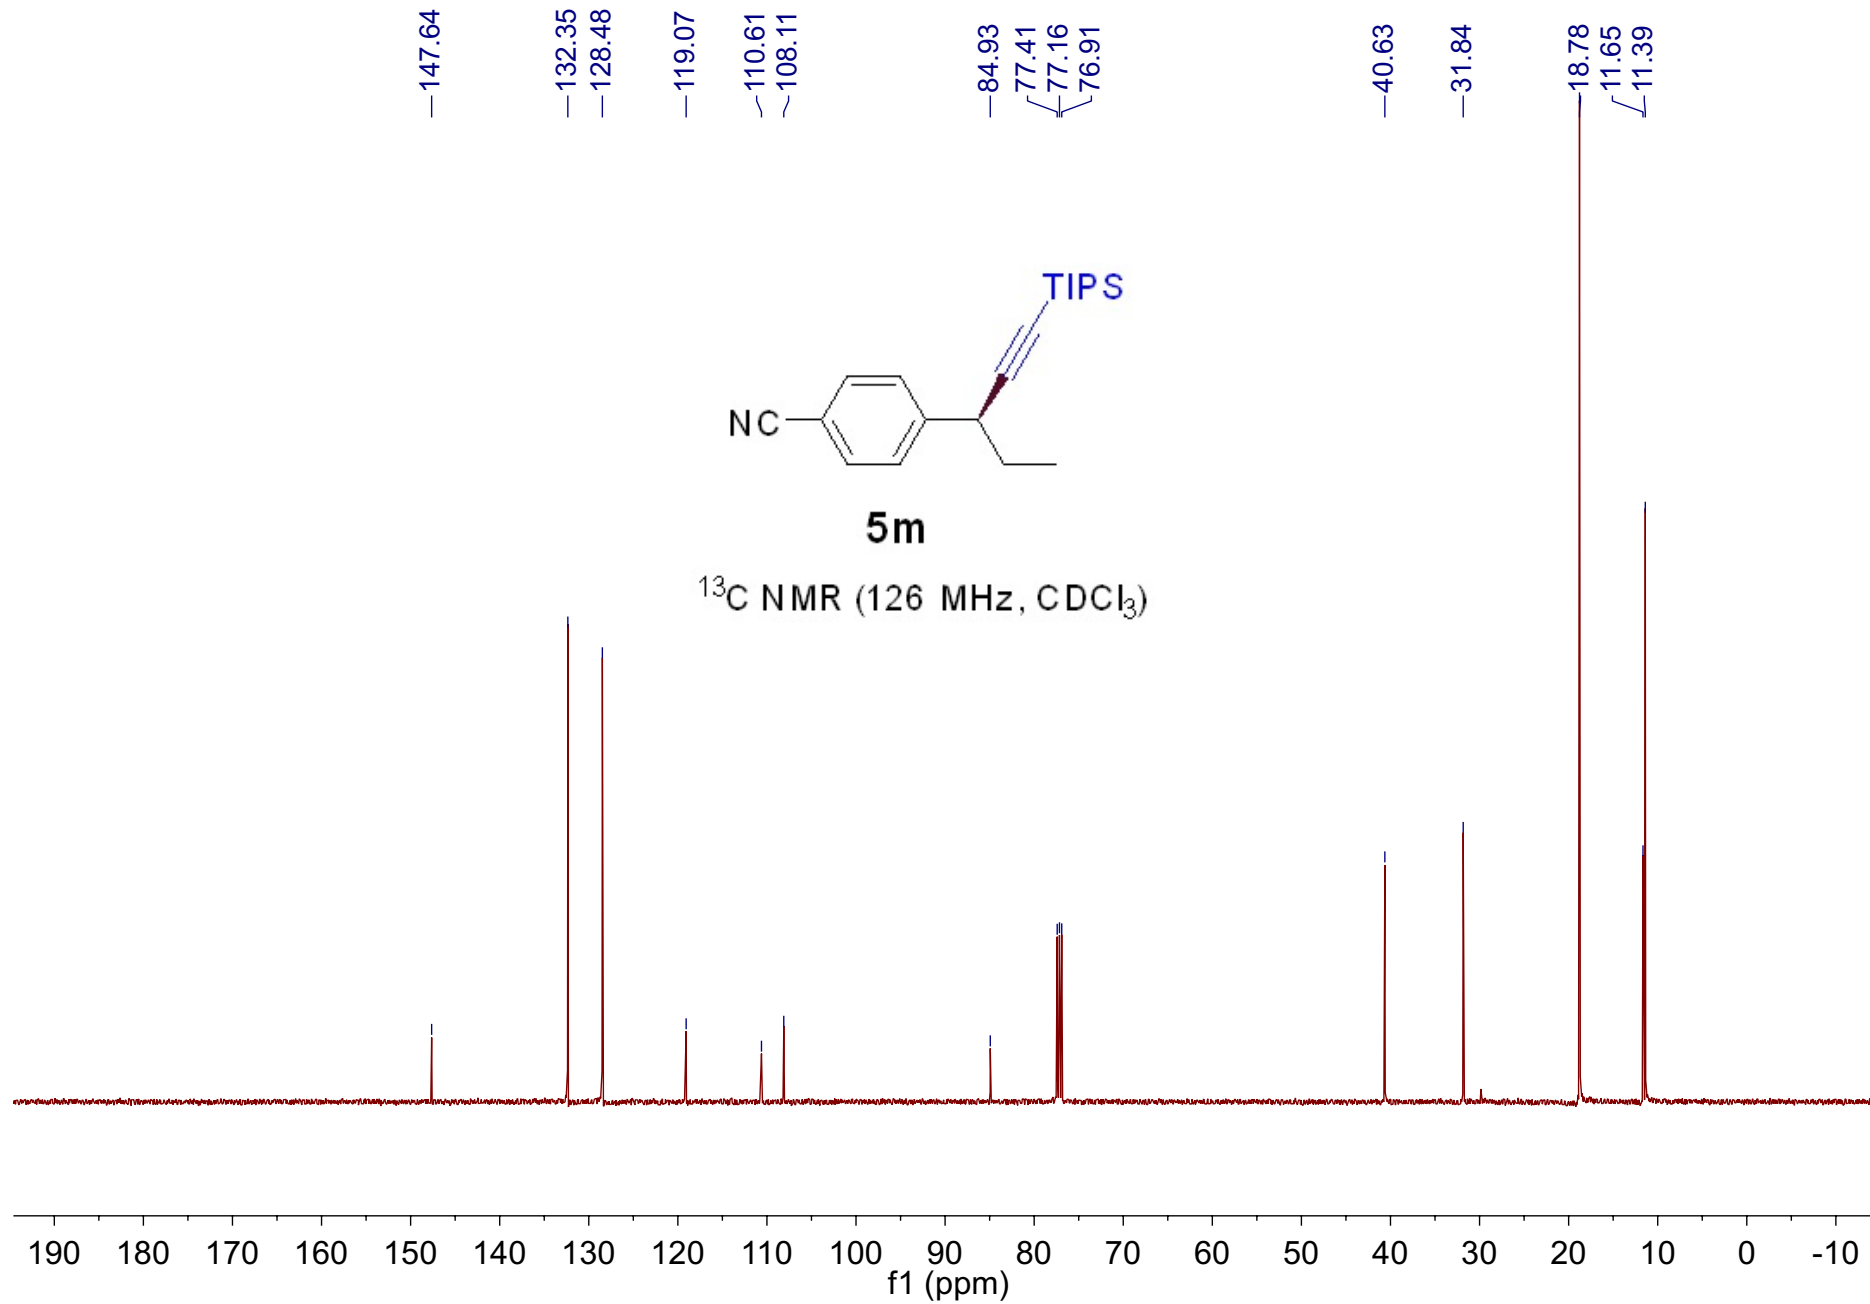

Supplementary Fig. 132.  $^{13}\text{C}$  NMR (126 MHz,  $\text{CDCl}_3$ ) spectra for compound **5m**



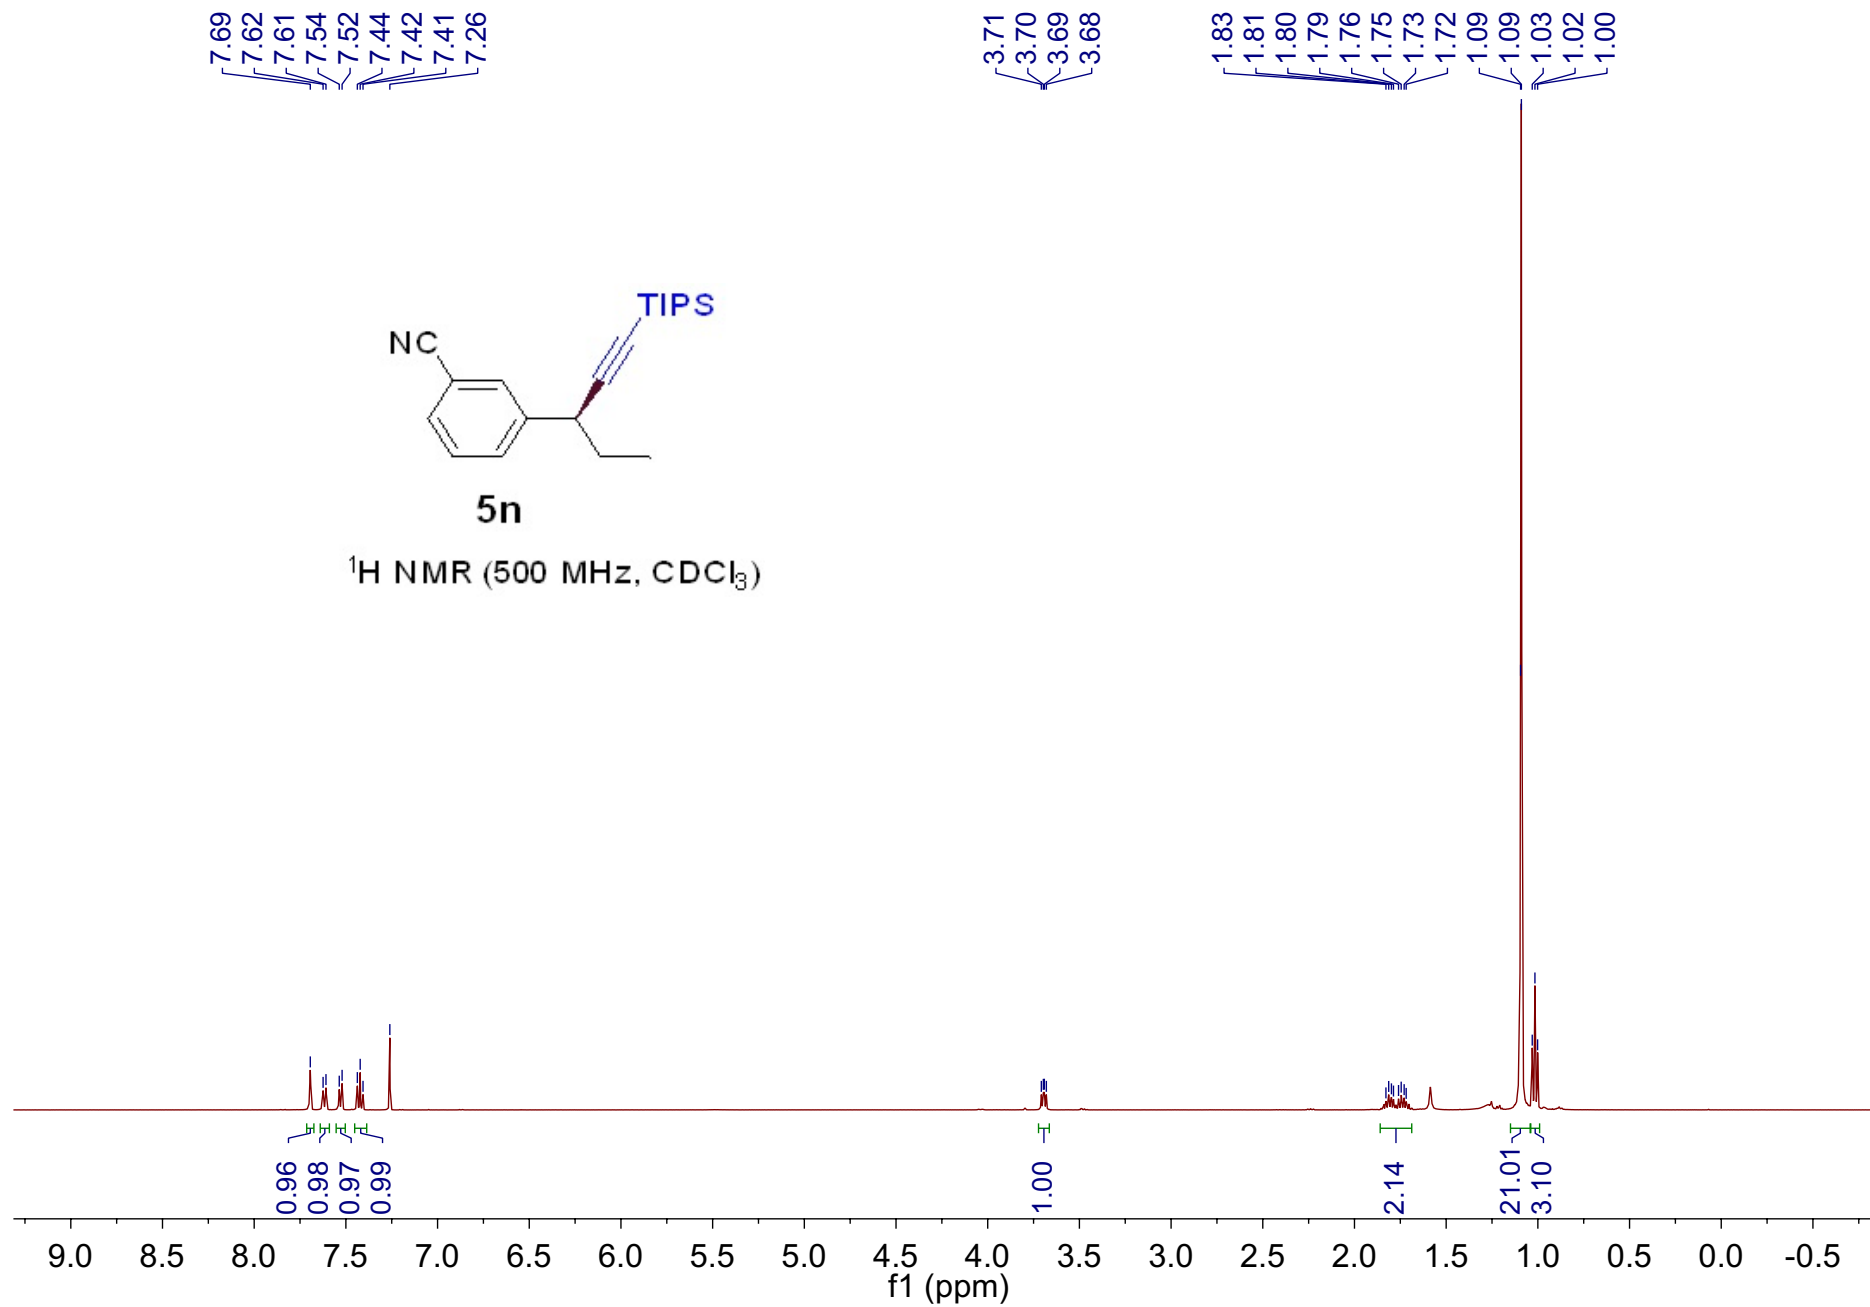

**Supplementary Fig. 133.** <sup>1</sup>H NMR (500 MHz, CDCl<sub>3</sub>) spectra for compound **5n**

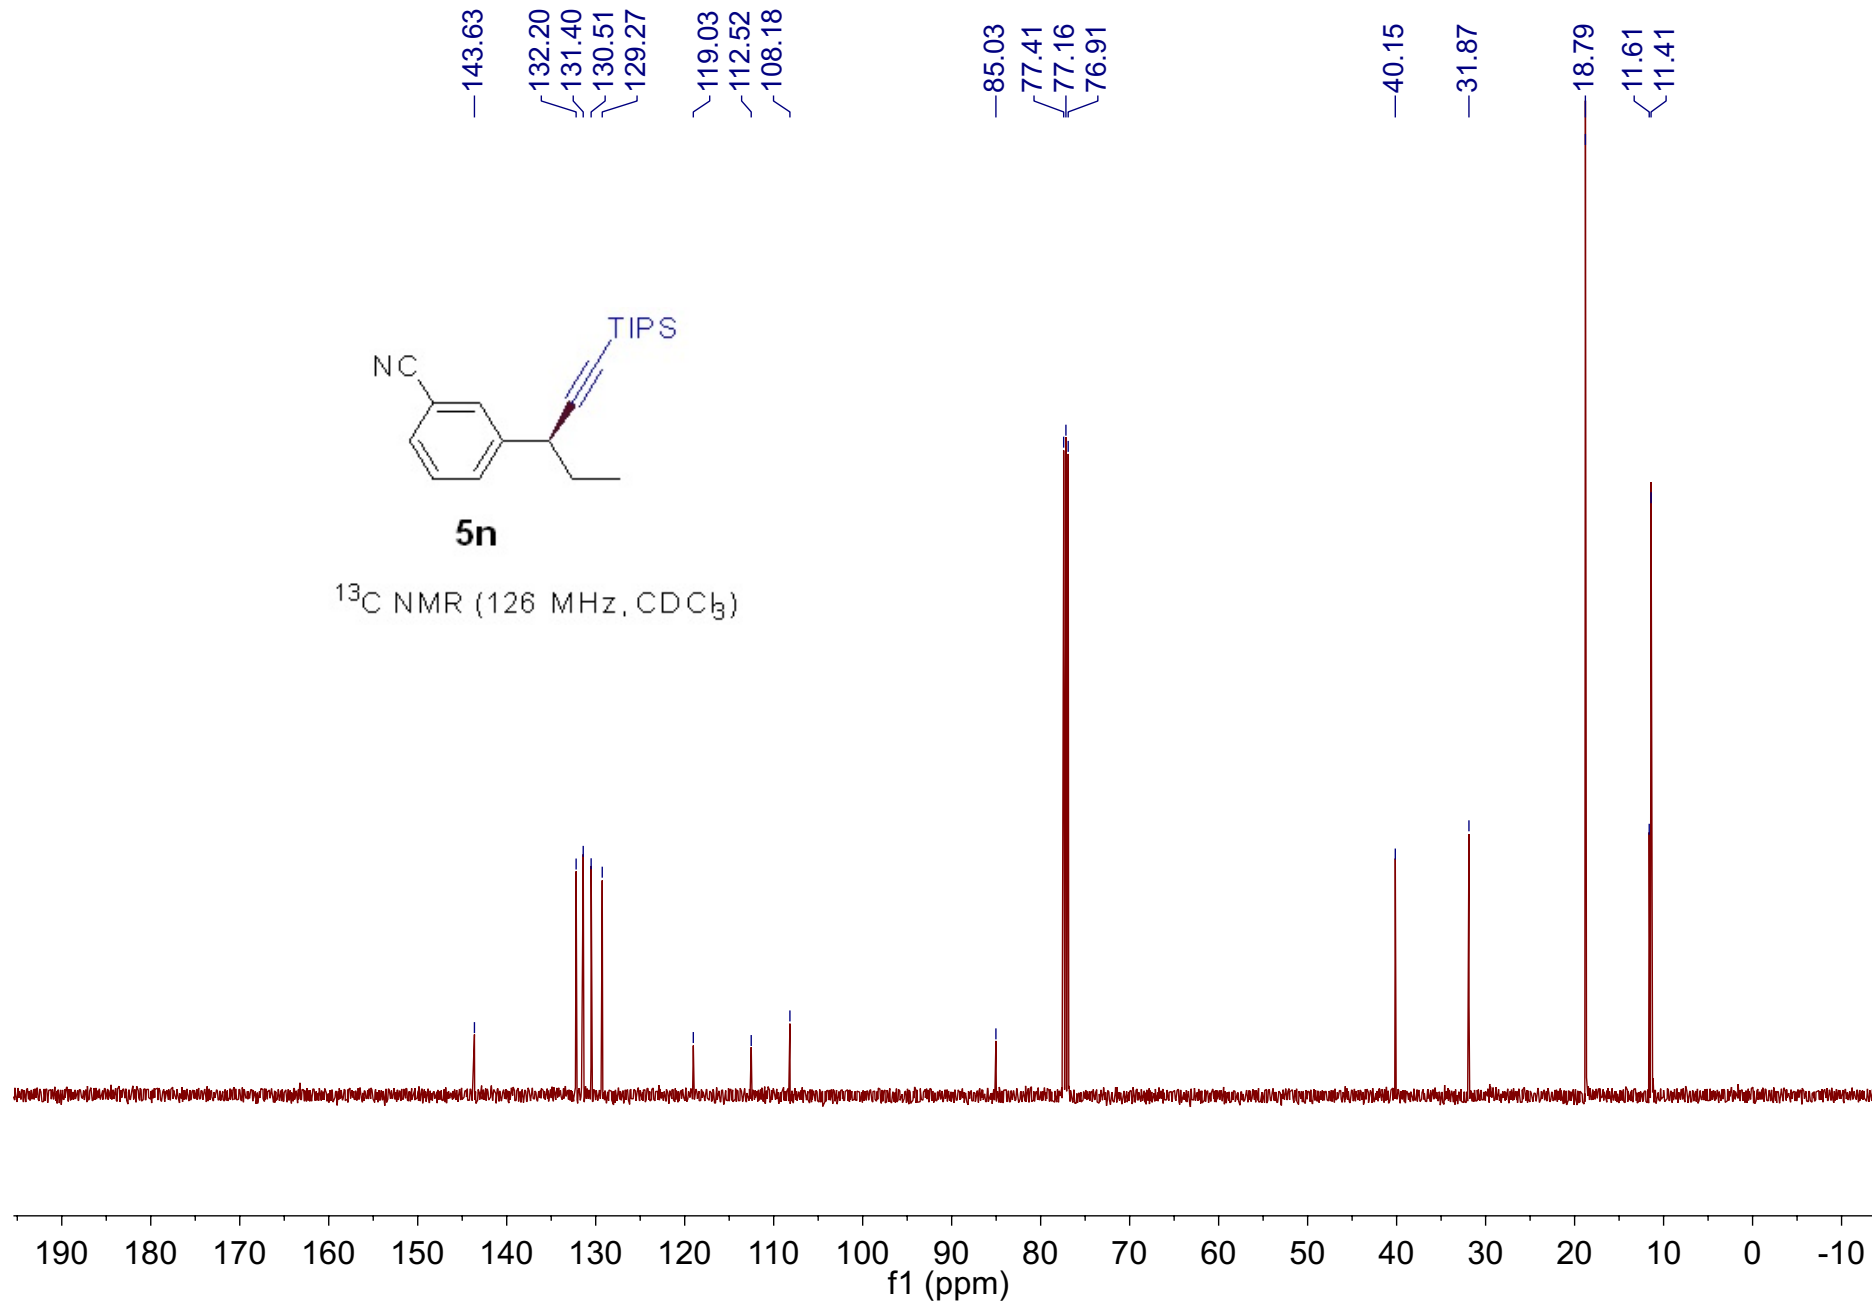

Supplementary Fig. 134.  $^{13}\text{C}$  NMR (126 MHz,  $\text{CDCl}_3$ ) spectra for compound **5n**

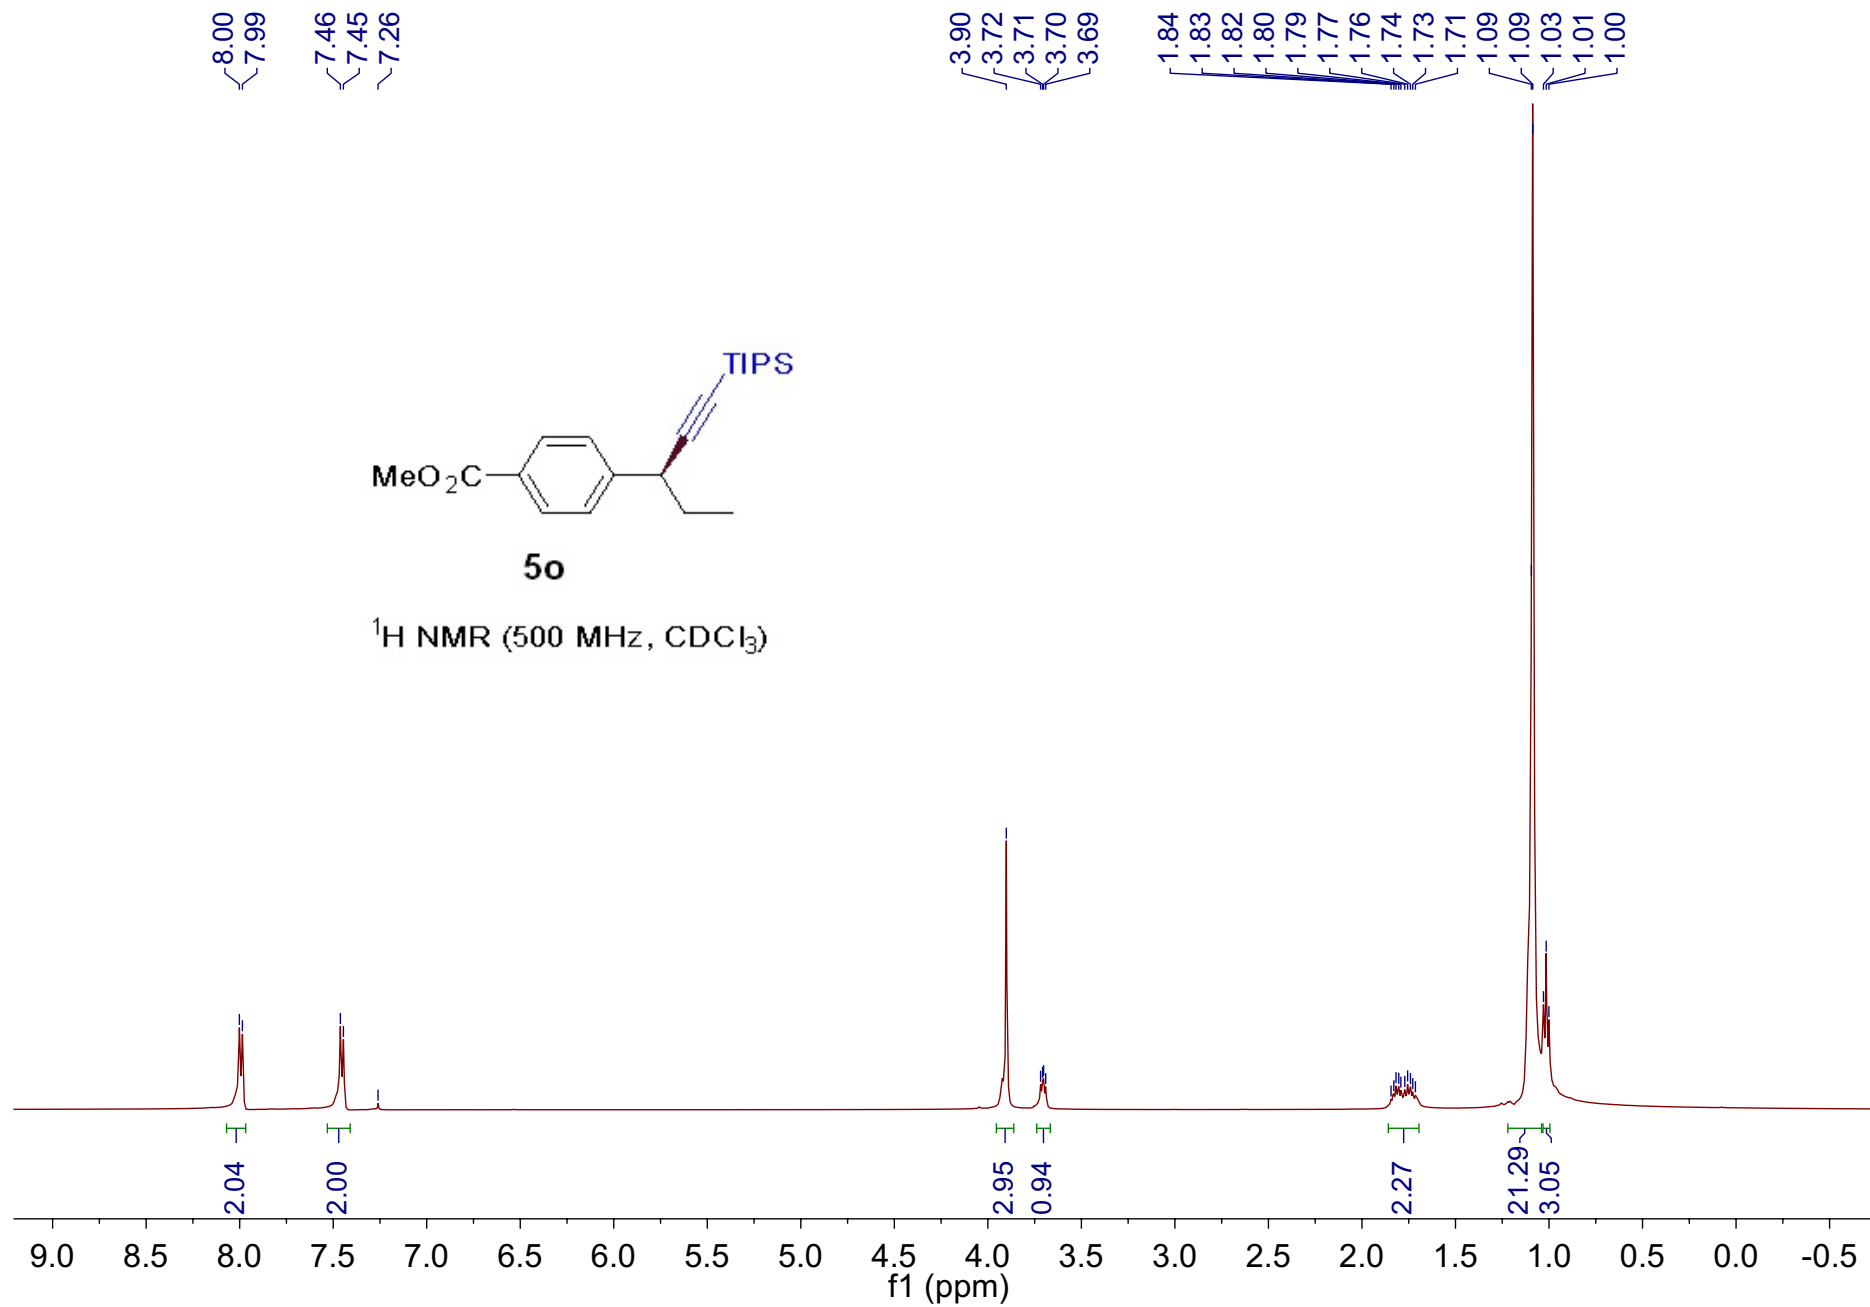

Supplementary Fig. 135. <sup>1</sup>H NMR (500 MHz, CDCl<sub>3</sub>) spectra for compound **5o**

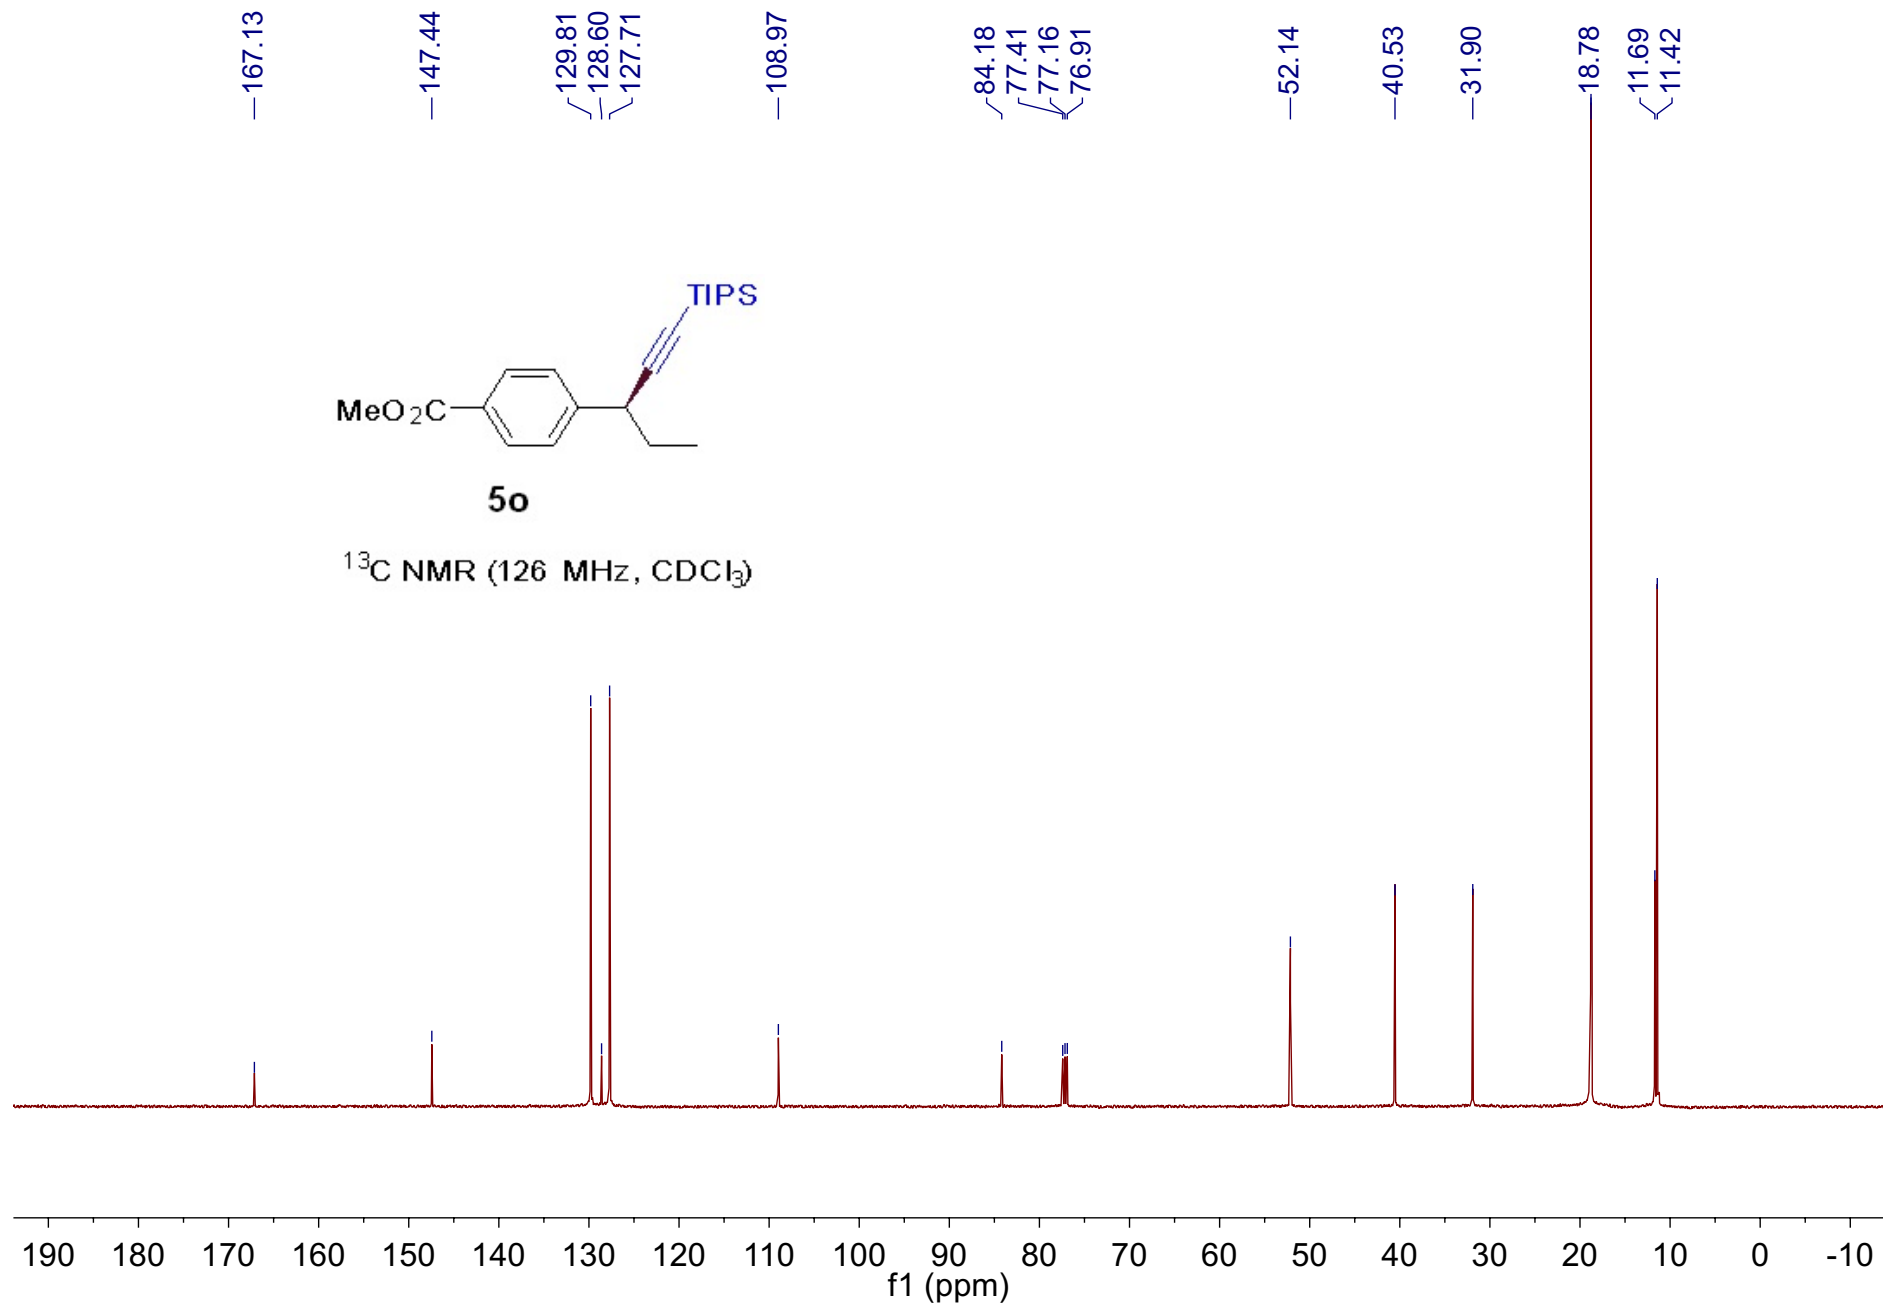

Supplementary Fig. 136.  $^{13}\text{C}$  NMR (126 MHz,  $\text{CDCl}_3$ ) spectra for compound **5o**

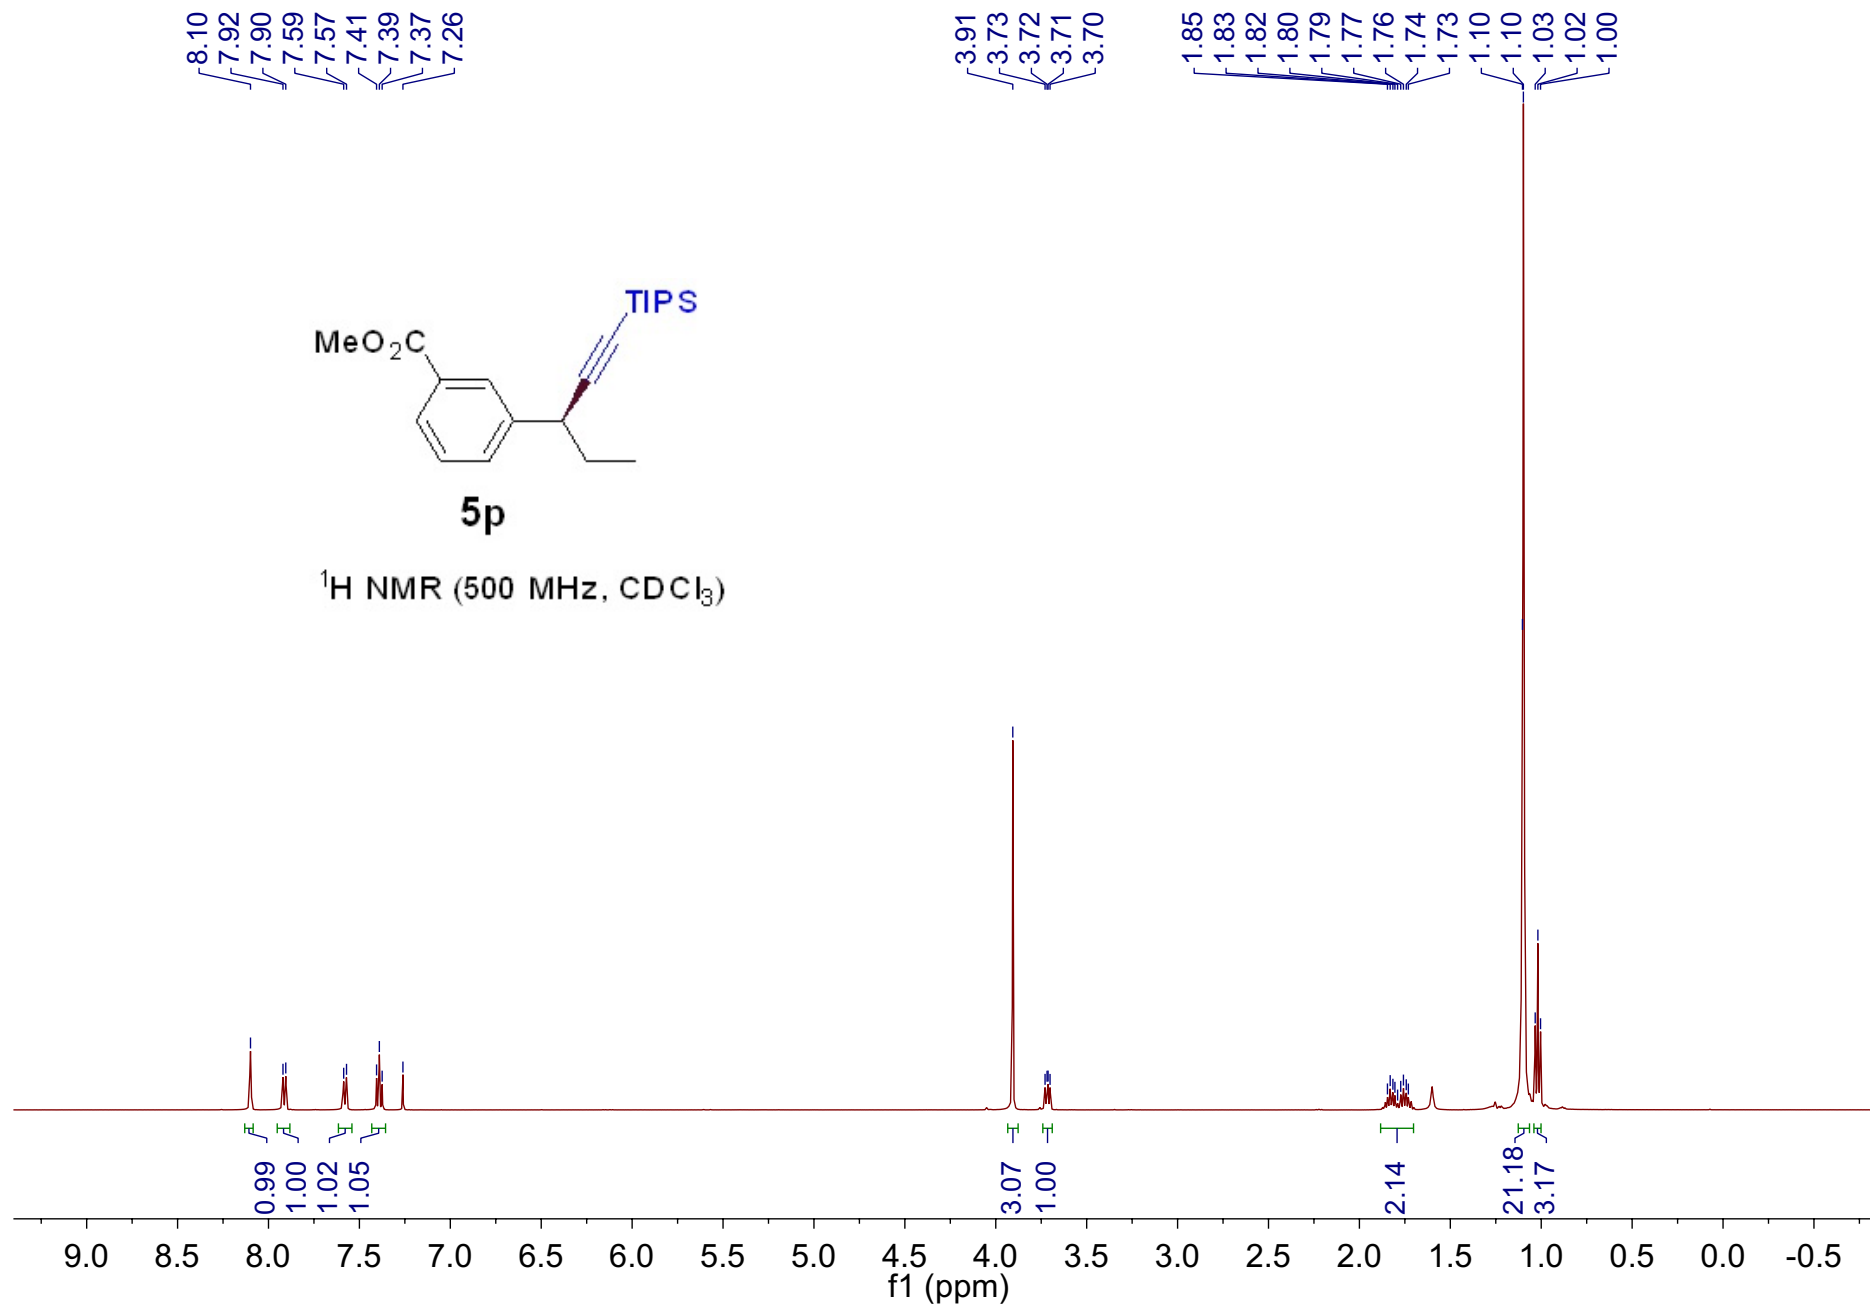

Supplementary Fig. 137. <sup>1</sup>H NMR (500 MHz, CDCl<sub>3</sub>) spectra for compound **5p**

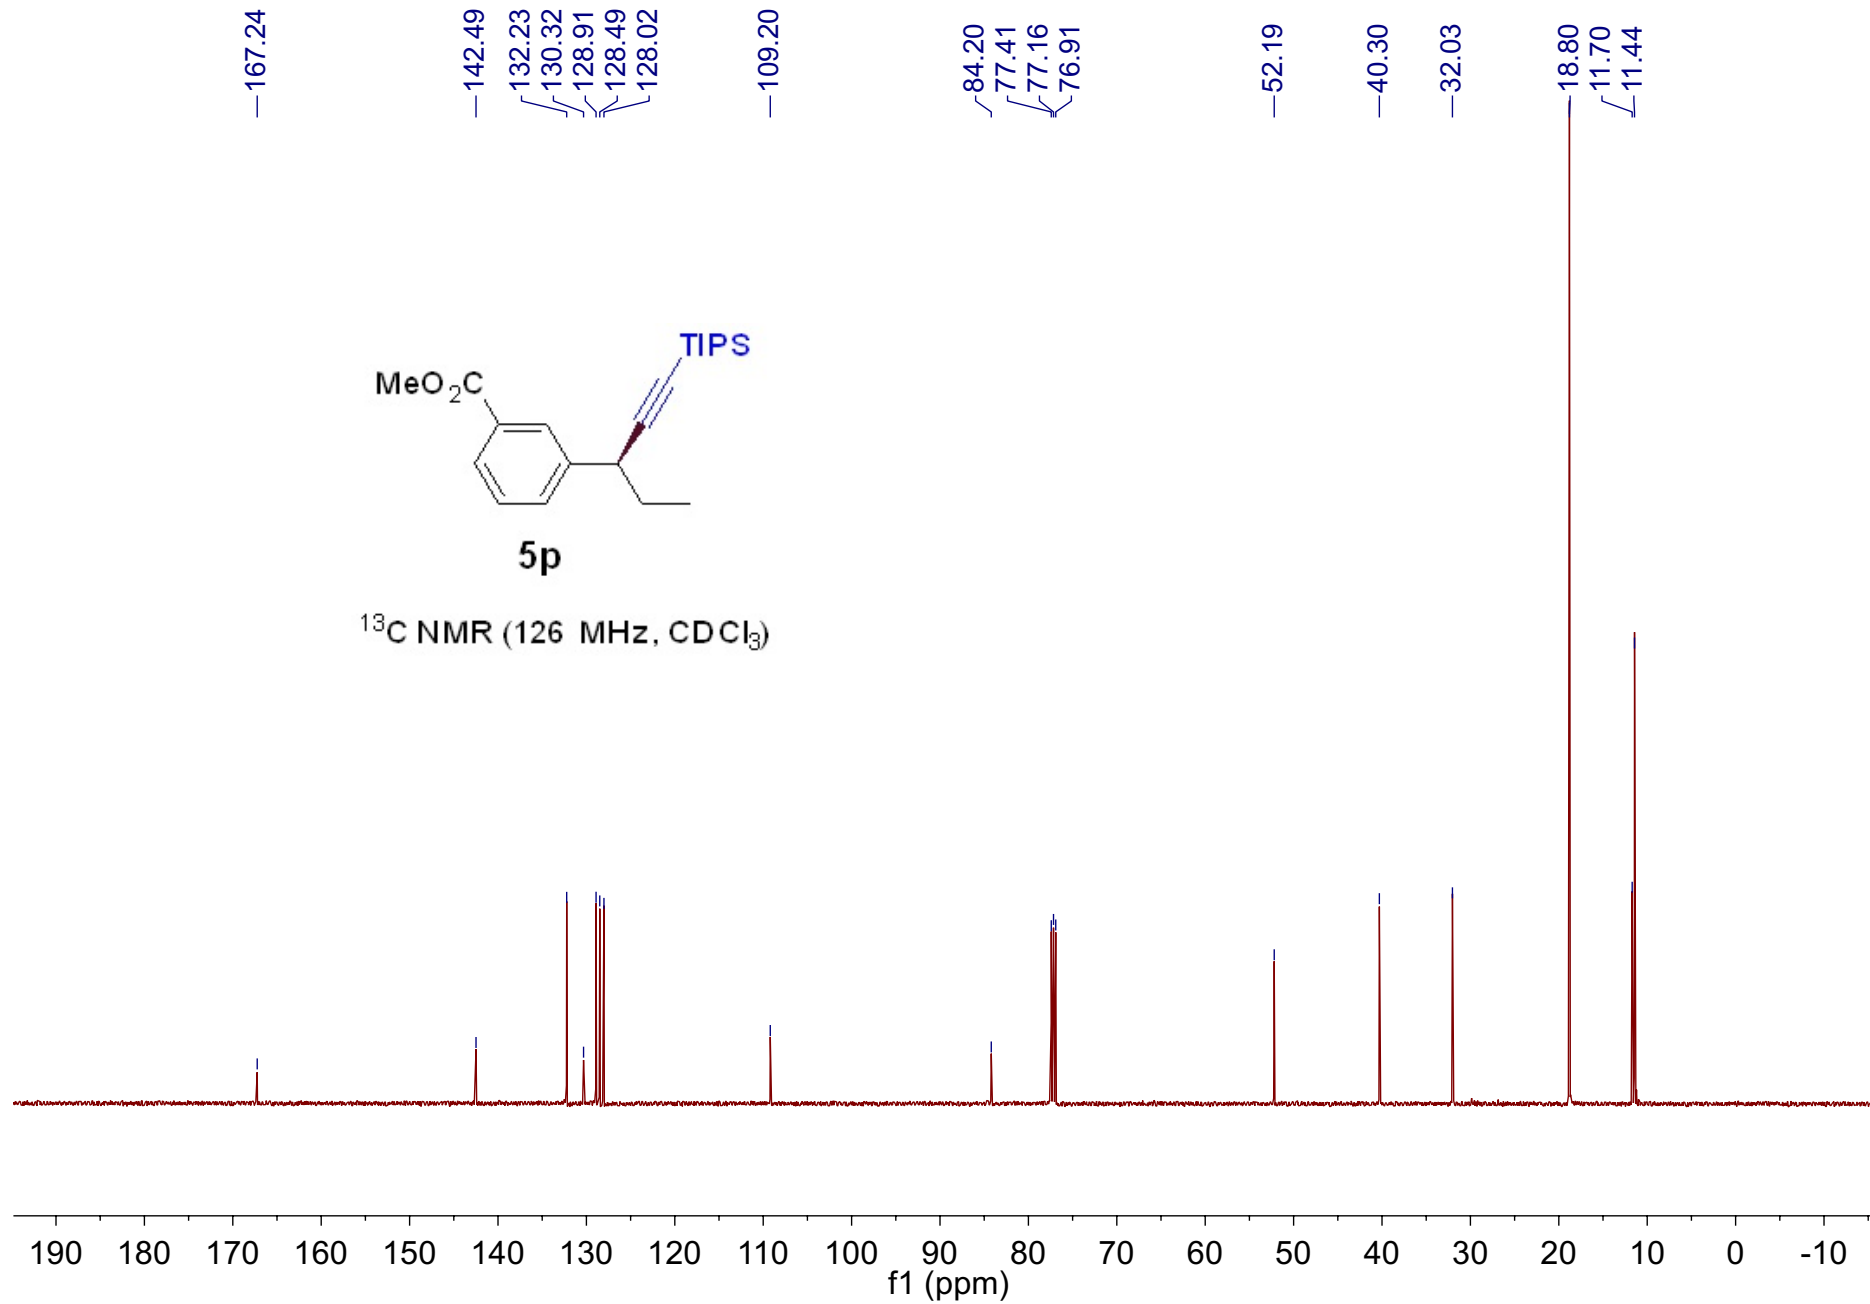

Supplementary Fig. 138.  $^{13}\text{C}$  NMR (126 MHz,  $\text{CDCl}_3$ ) spectra for compound **5p**

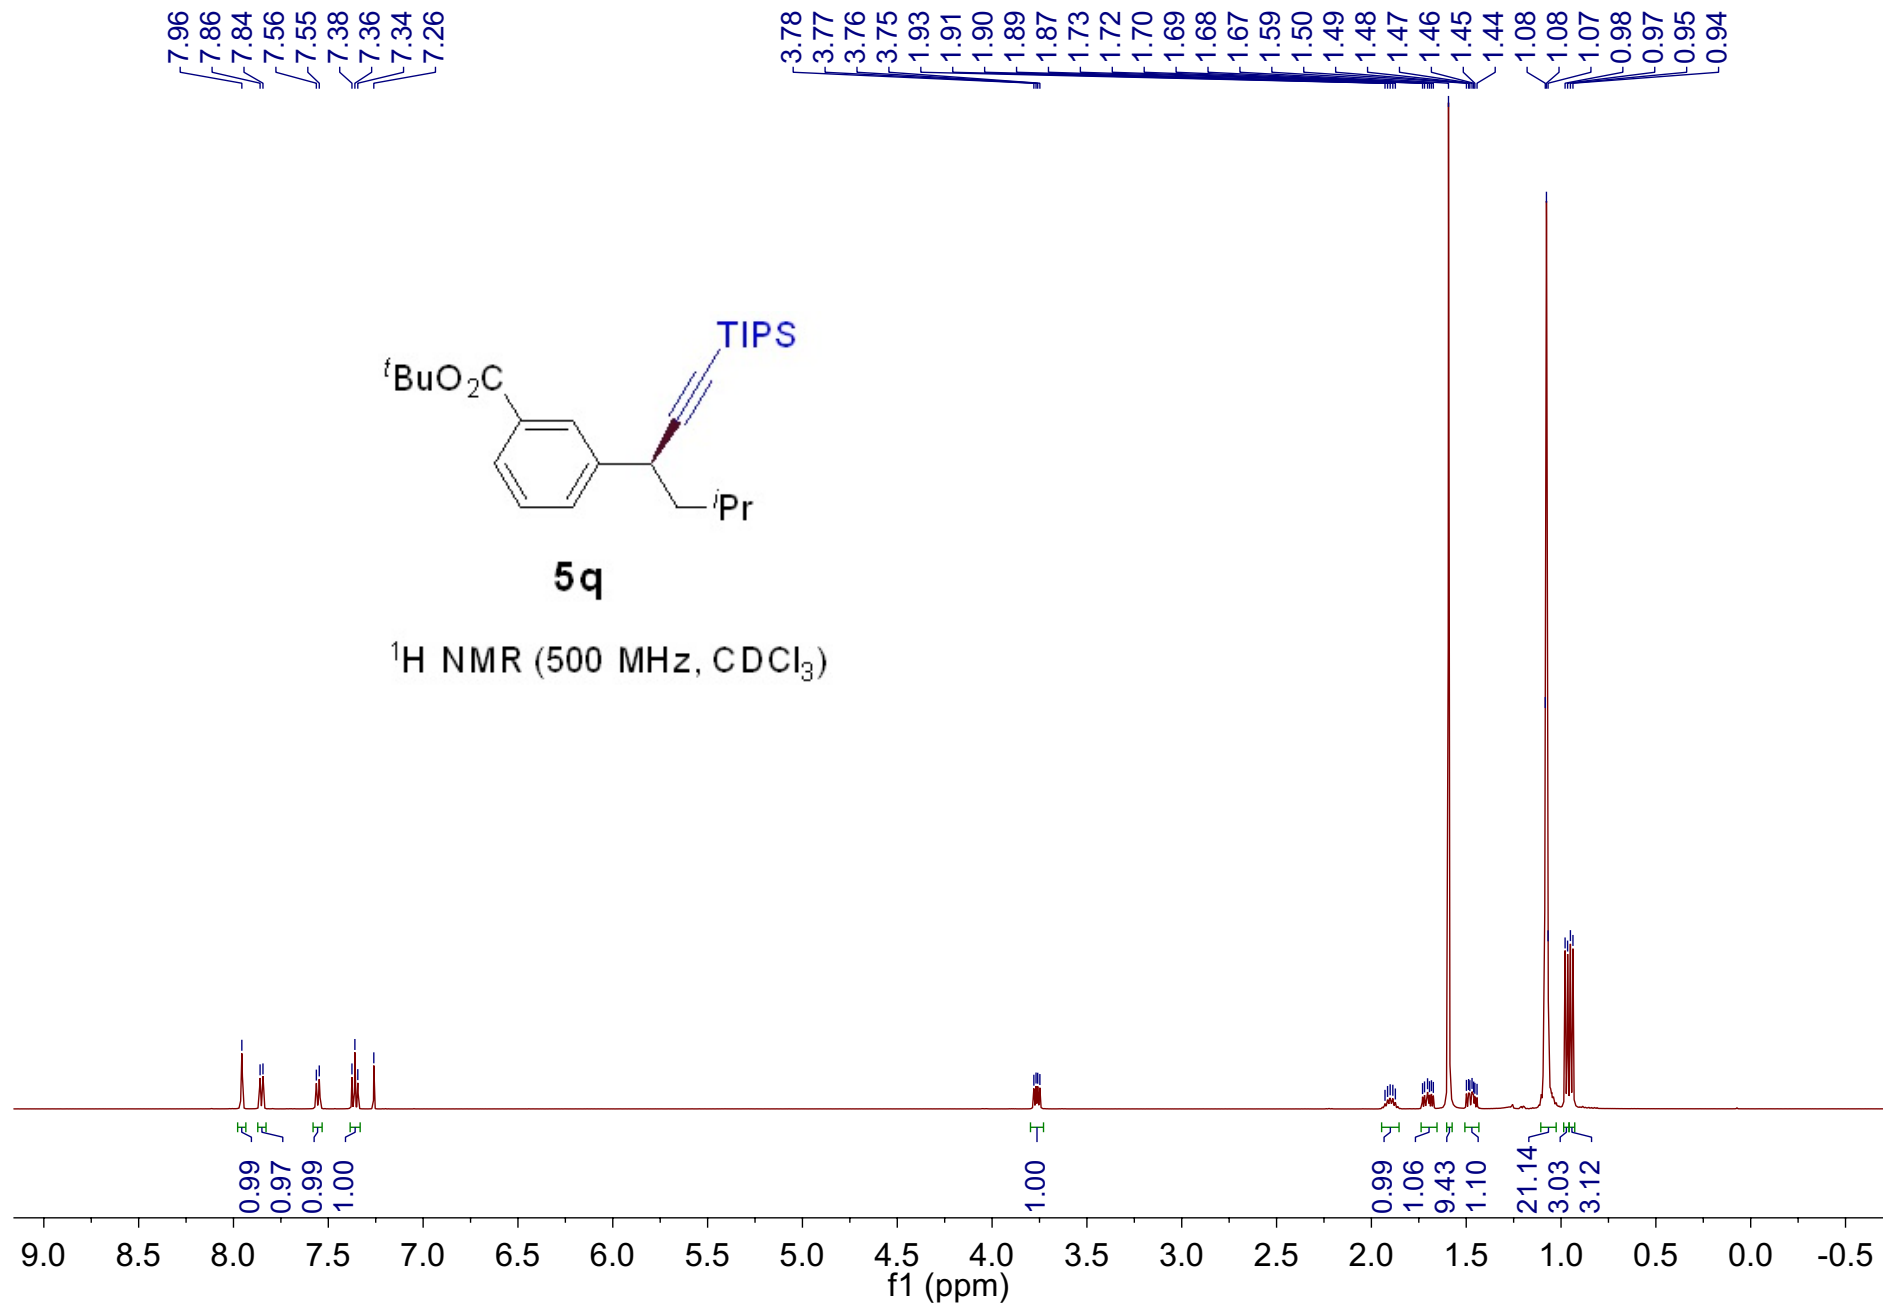

Supplementary Fig. 139.  $^1\text{H}$  NMR (500 MHz,  $\text{CDCl}_3$ ) spectra for compound **5q**

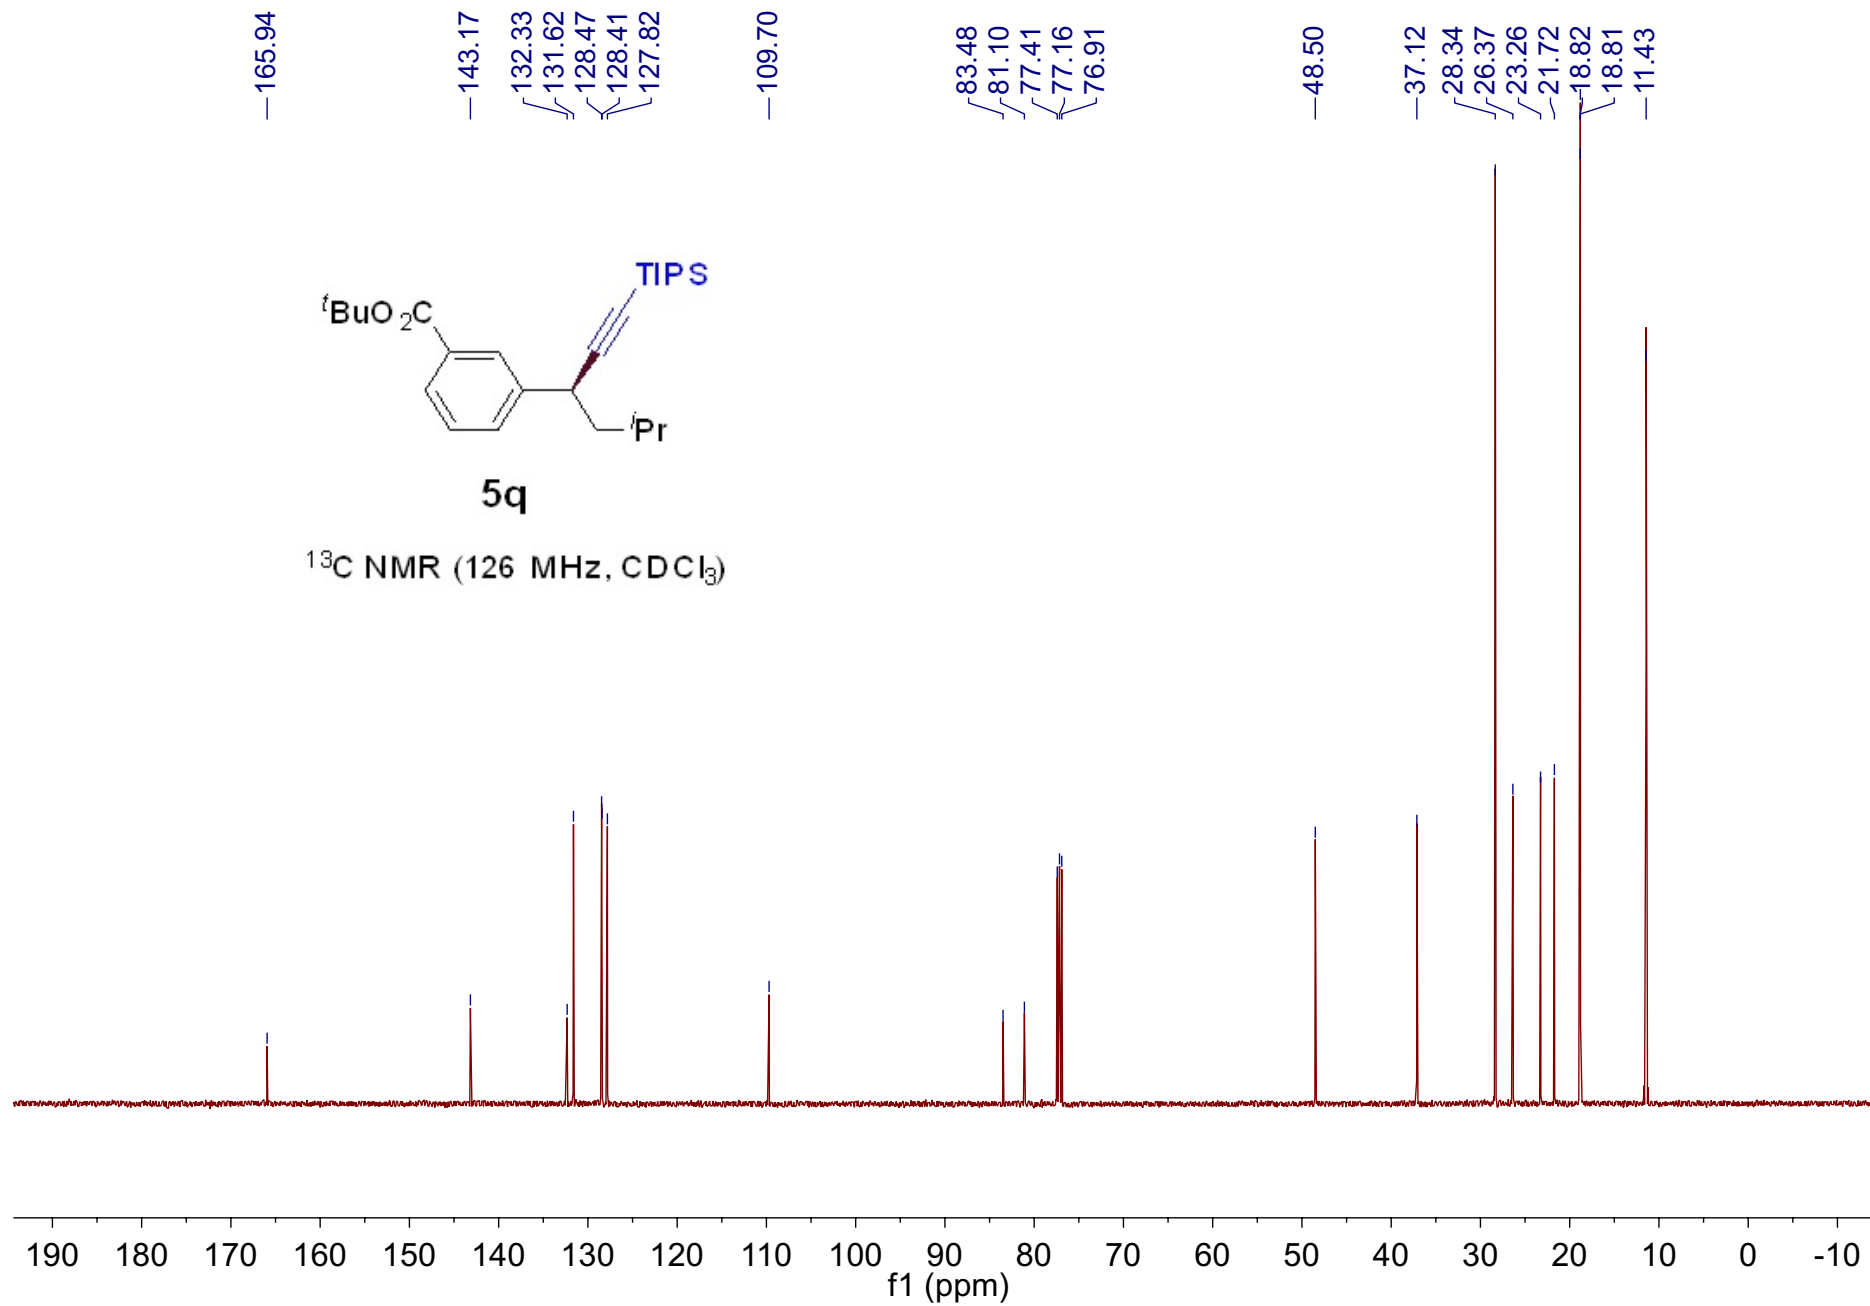

Supplementary Fig. 140.  $^{13}\text{C}$  NMR (126 MHz,  $\text{CDCl}_3$ ) spectra for compound **5q**



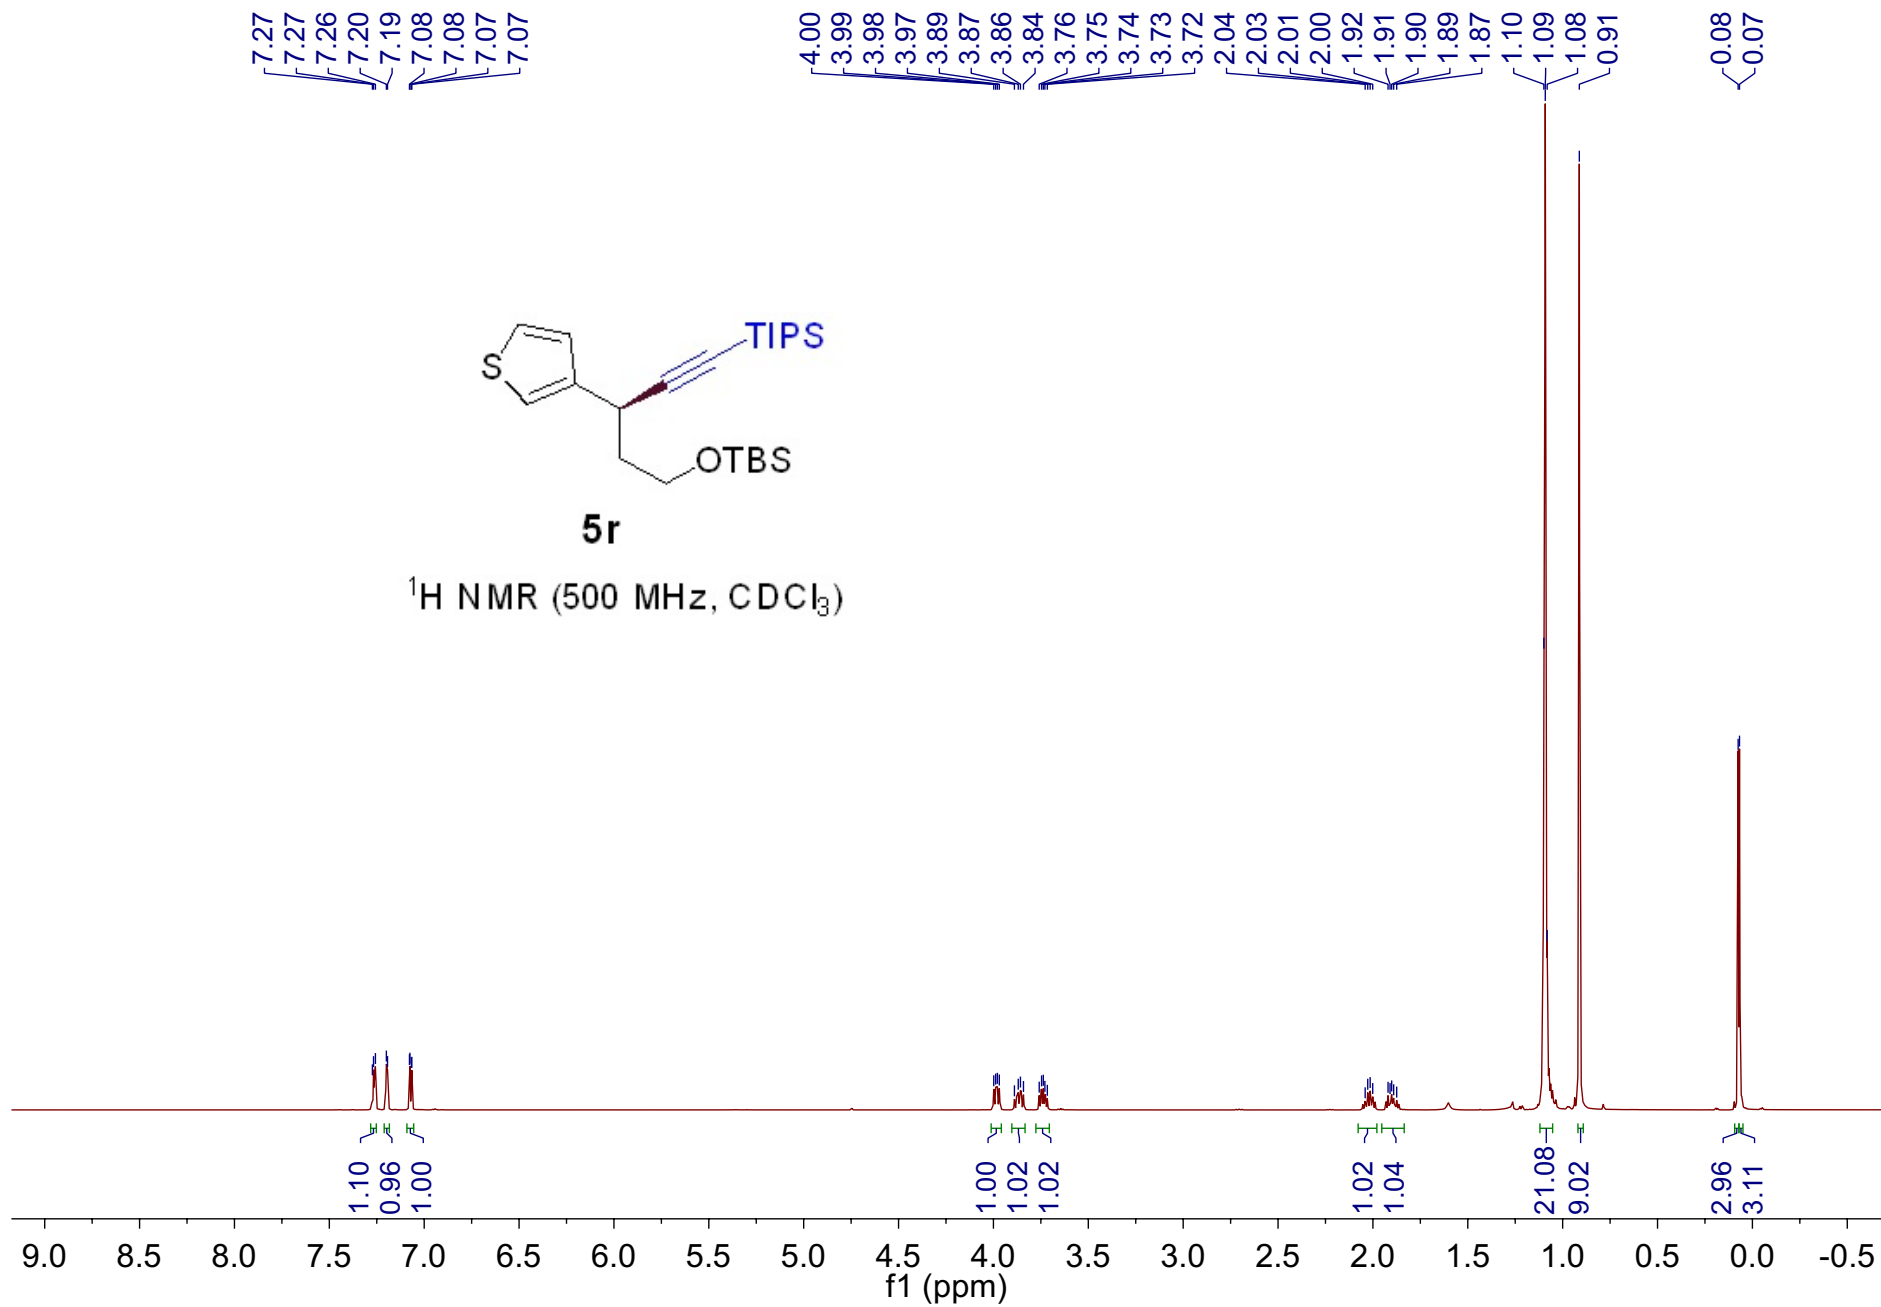

Supplementary Fig. 141. <sup>1</sup>H NMR (500 MHz, CDCl<sub>3</sub>) spectra for compound **5r**

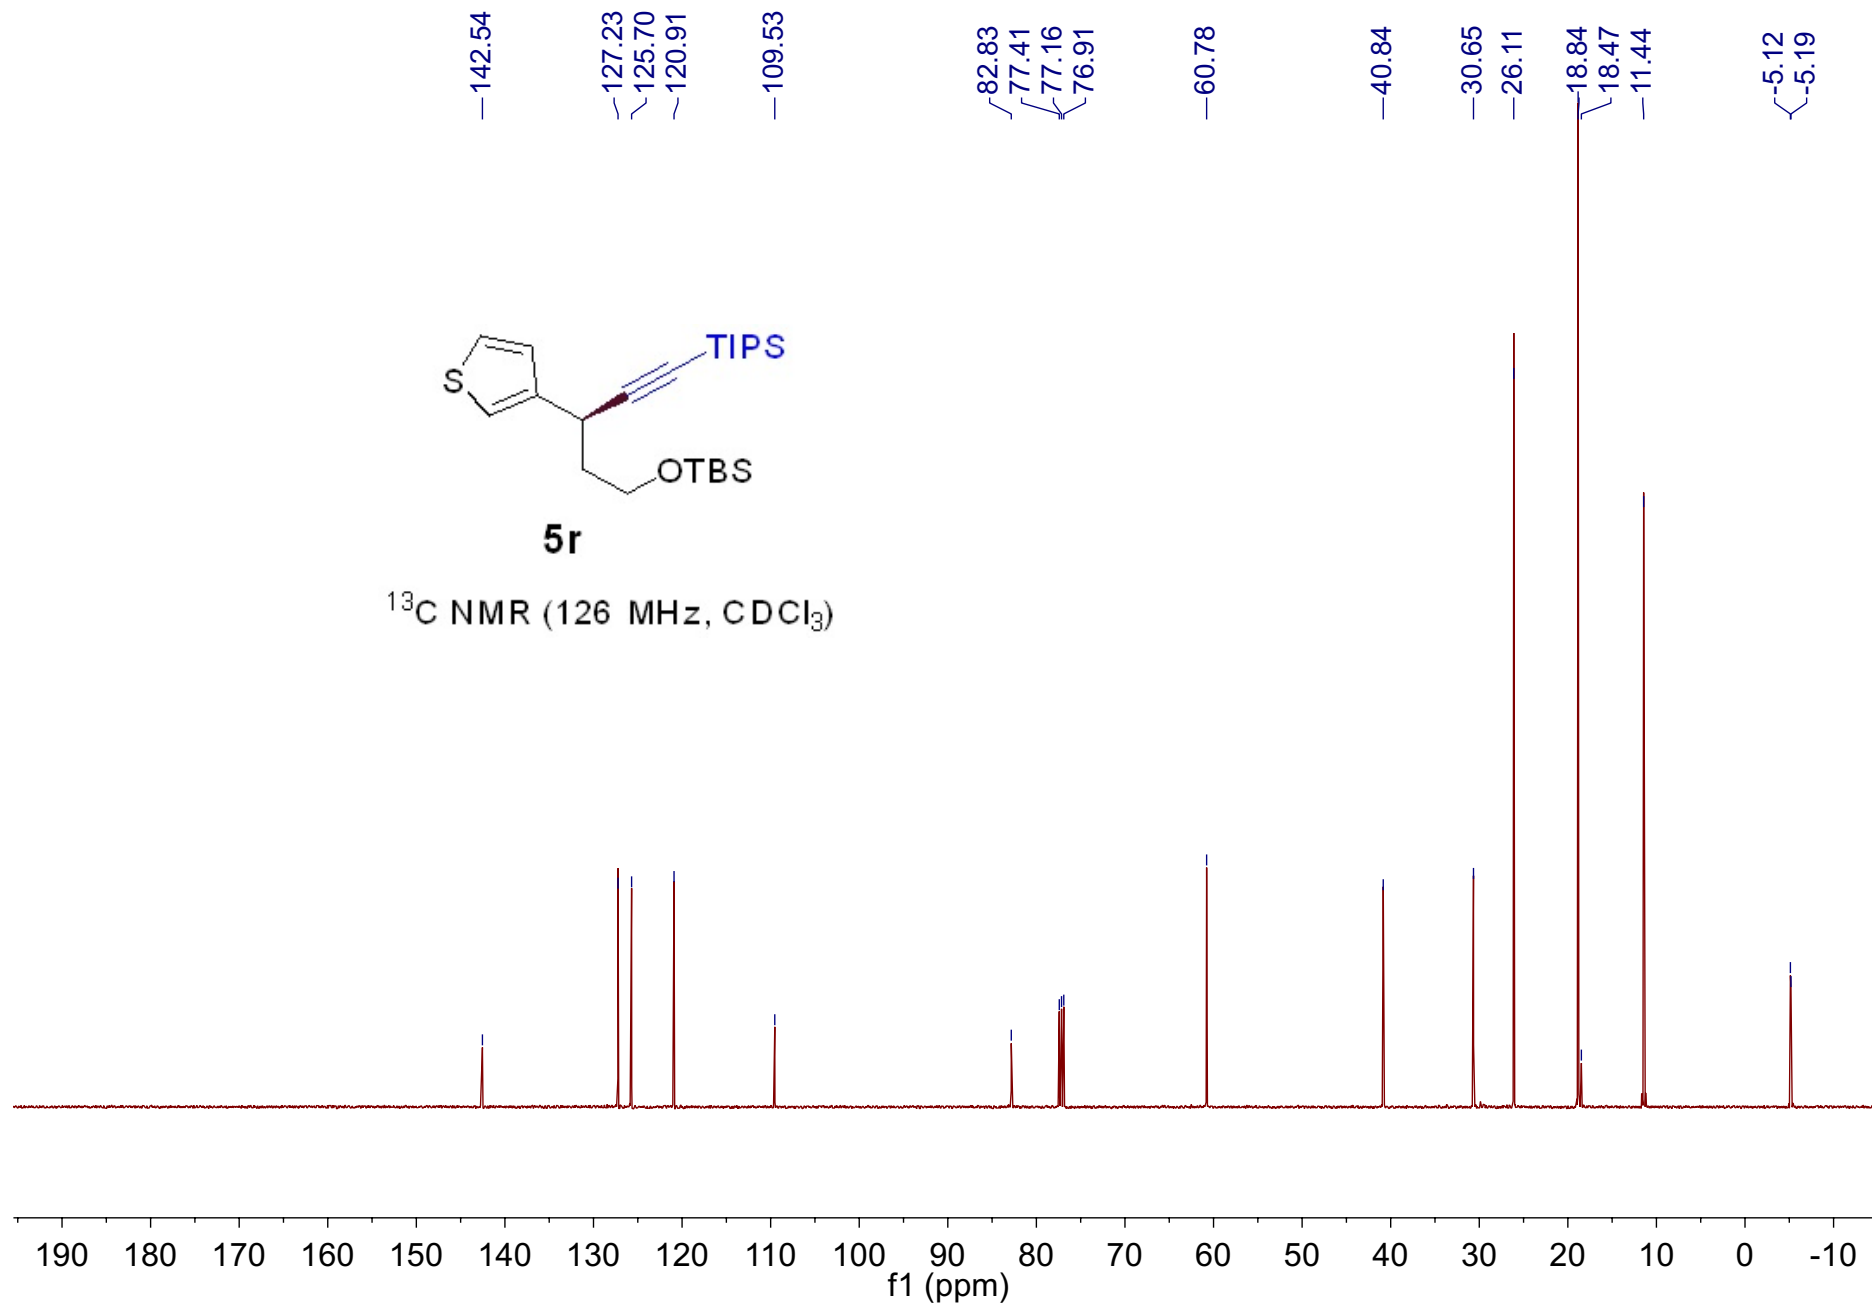

**Supplementary Fig. 142.**  $^{13}\text{C}$  NMR (126 MHz,  $\text{CDCl}_3$ ) spectra for compound **5r**

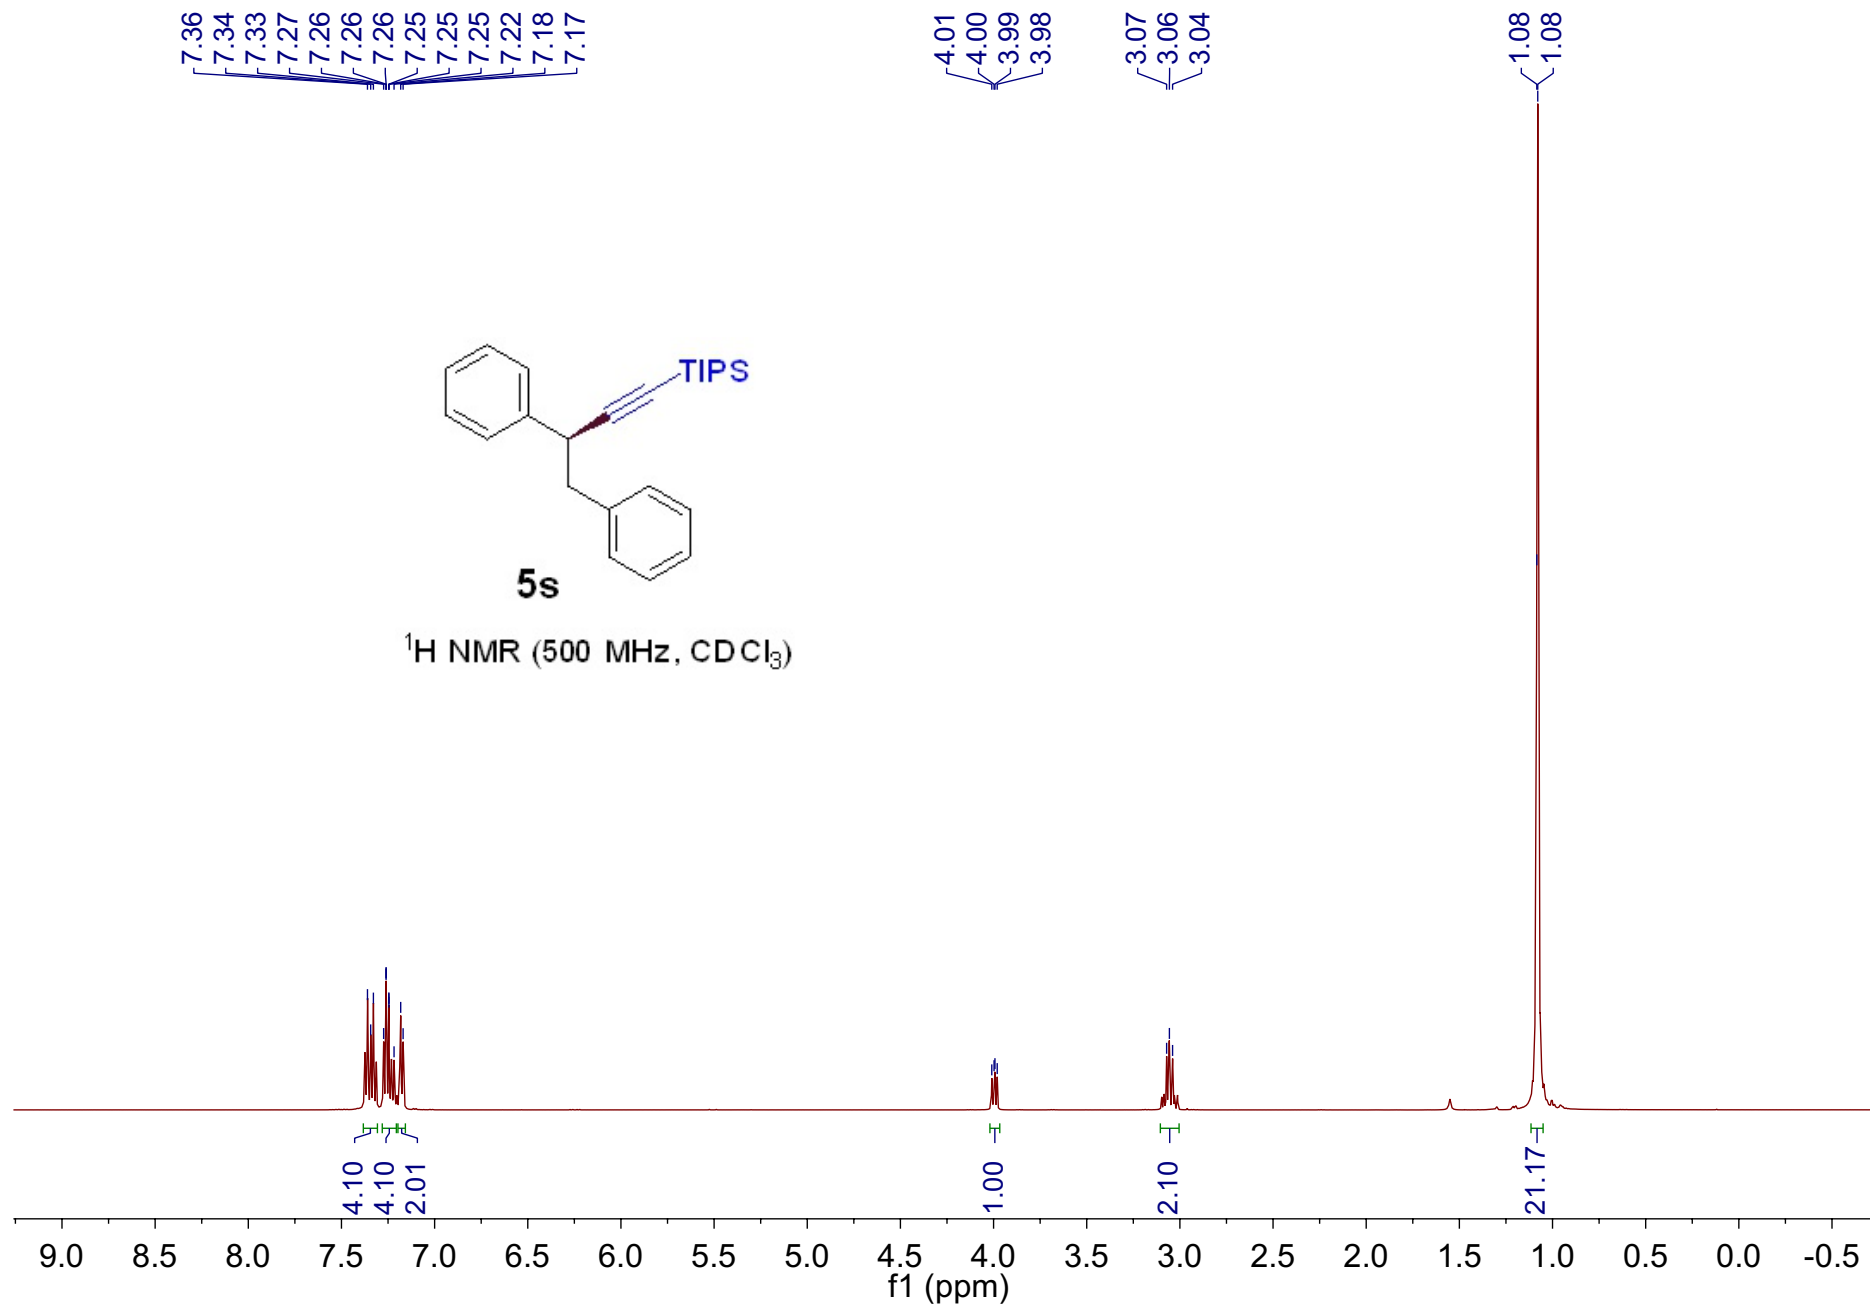

Supplementary Fig. 143. <sup>1</sup>H NMR (500 MHz, CDCl<sub>3</sub>) spectra for compound **5s**

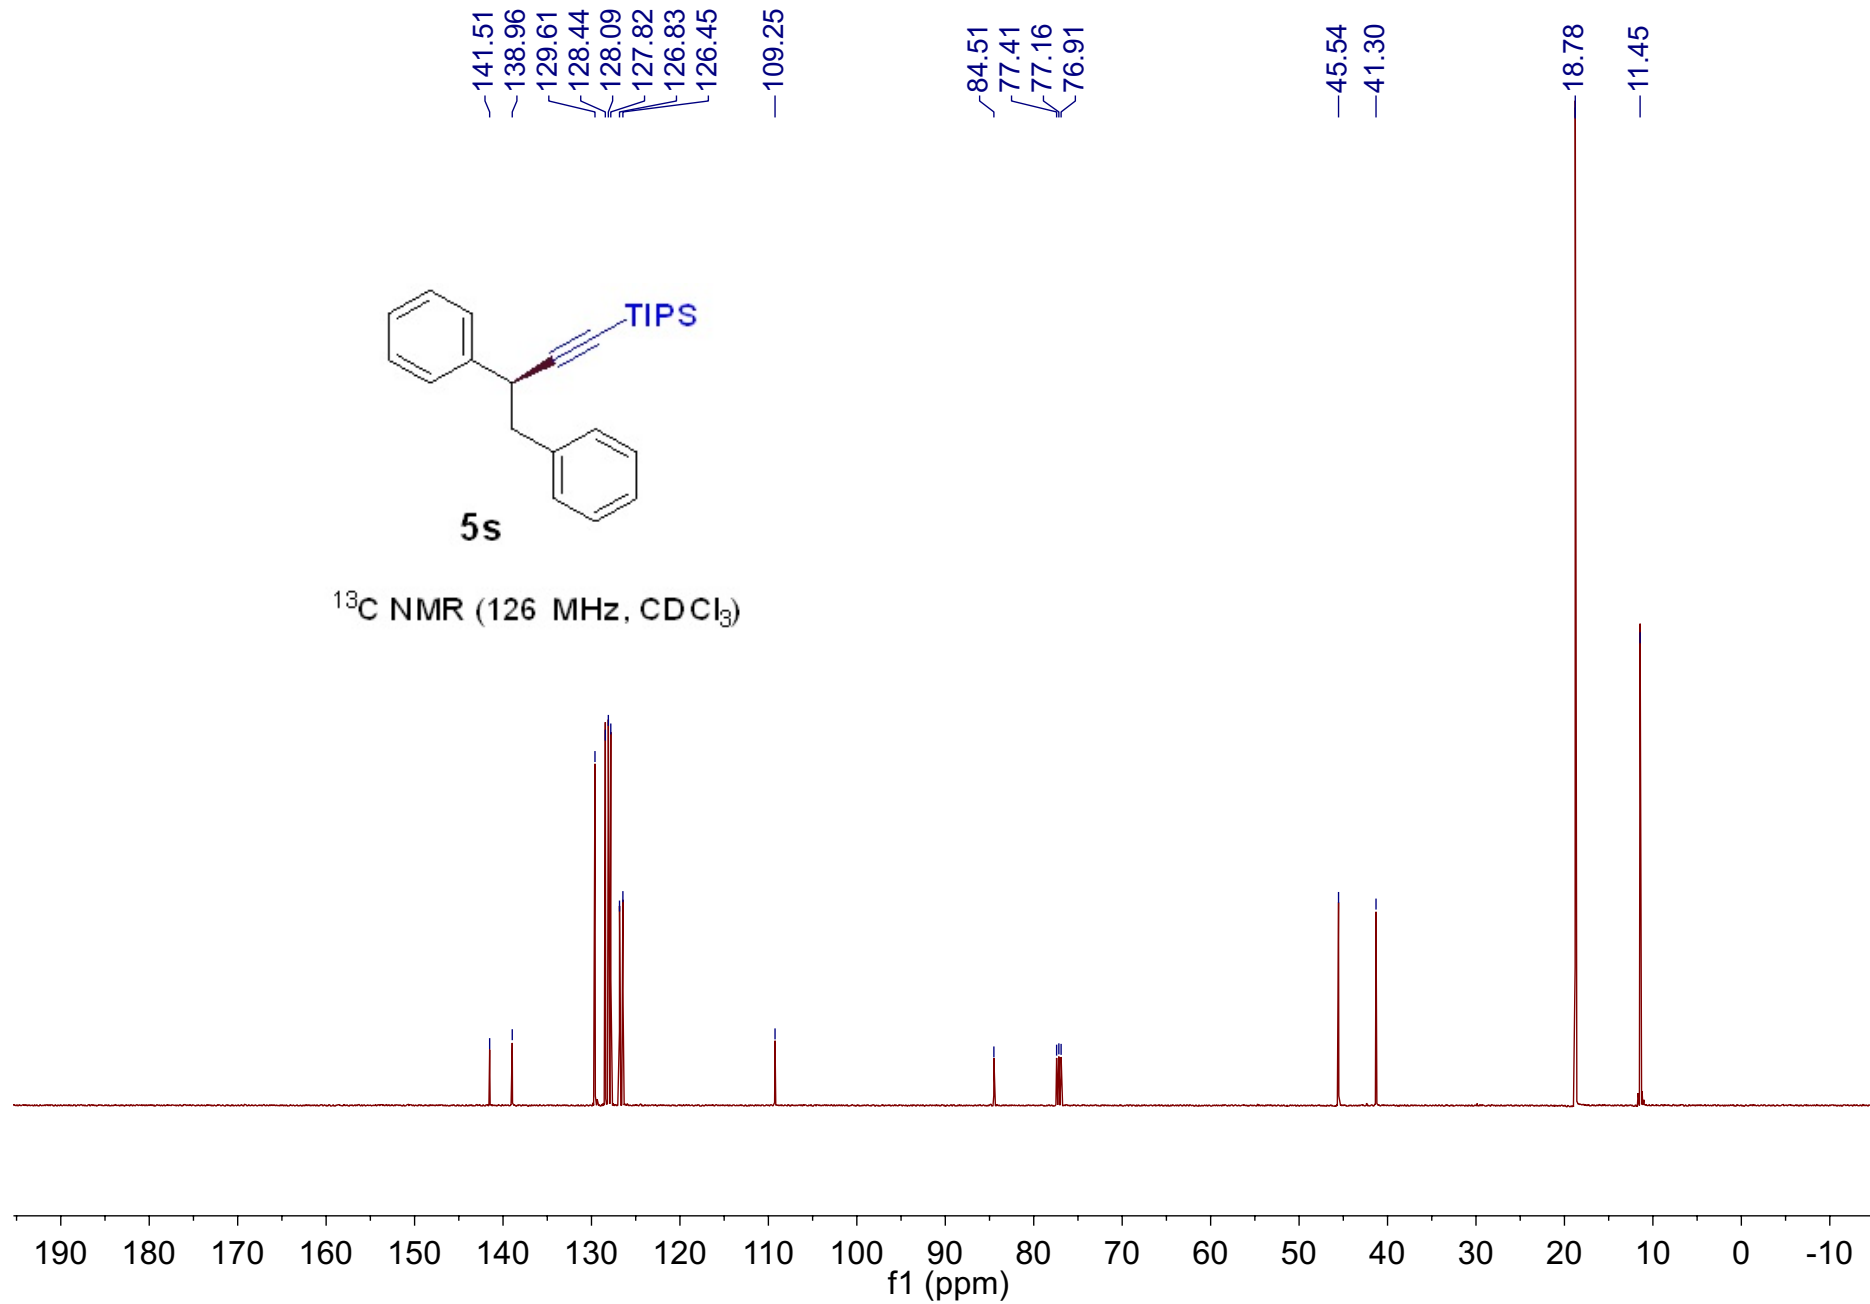

**Supplementary Fig. 144.**  $^{13}\text{C}$  NMR (126 MHz,  $\text{CDCl}_3$ ) spectra for compound **5s**

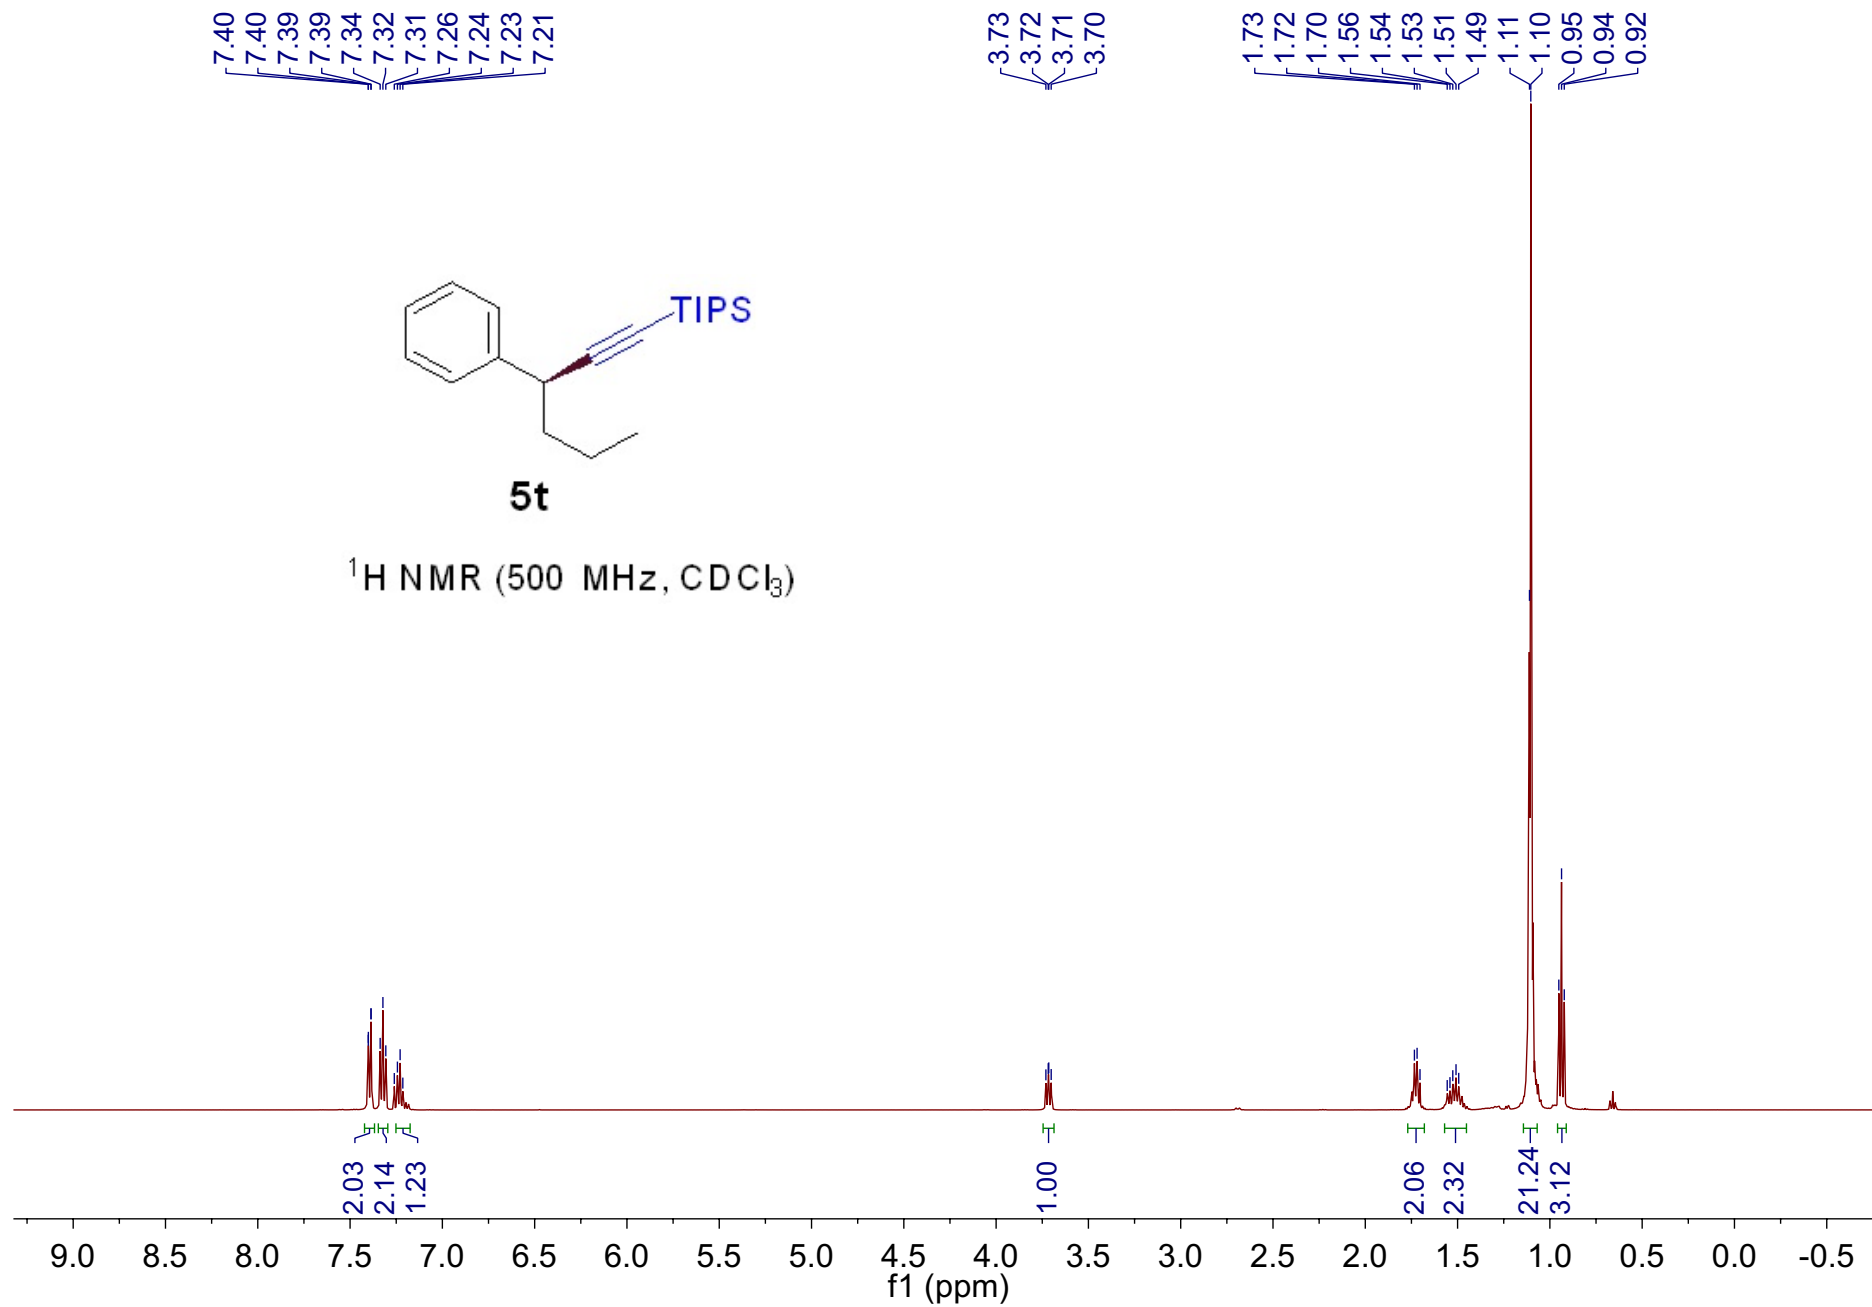

Supplementary Fig. 145. <sup>1</sup>H NMR (500 MHz, CDCl<sub>3</sub>) spectra for compound **5t**

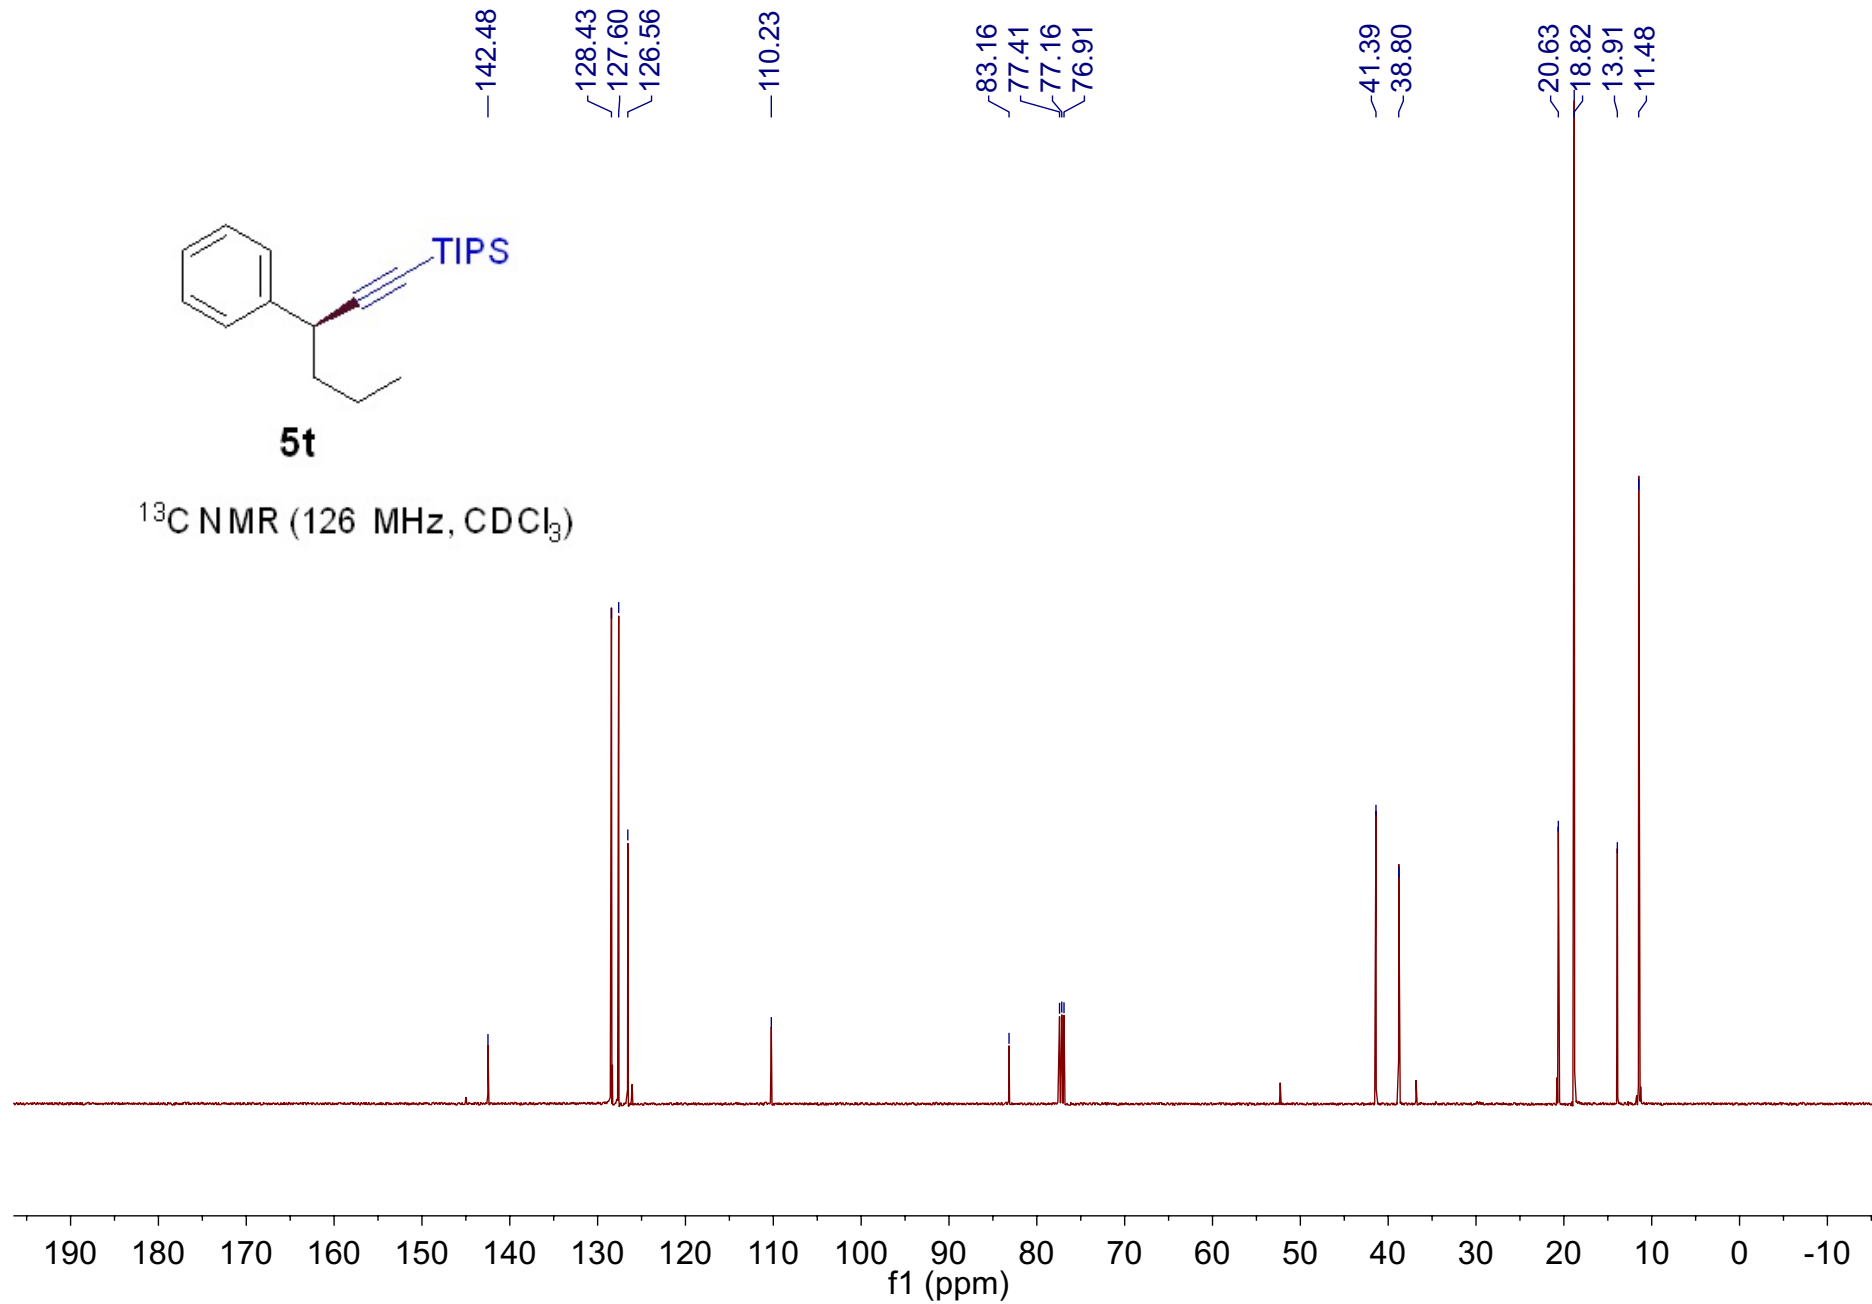

**Supplementary Fig. 146.** <sup>13</sup>C NMR (126 MHz, CDCl<sub>3</sub>) spectra for compound **5t**

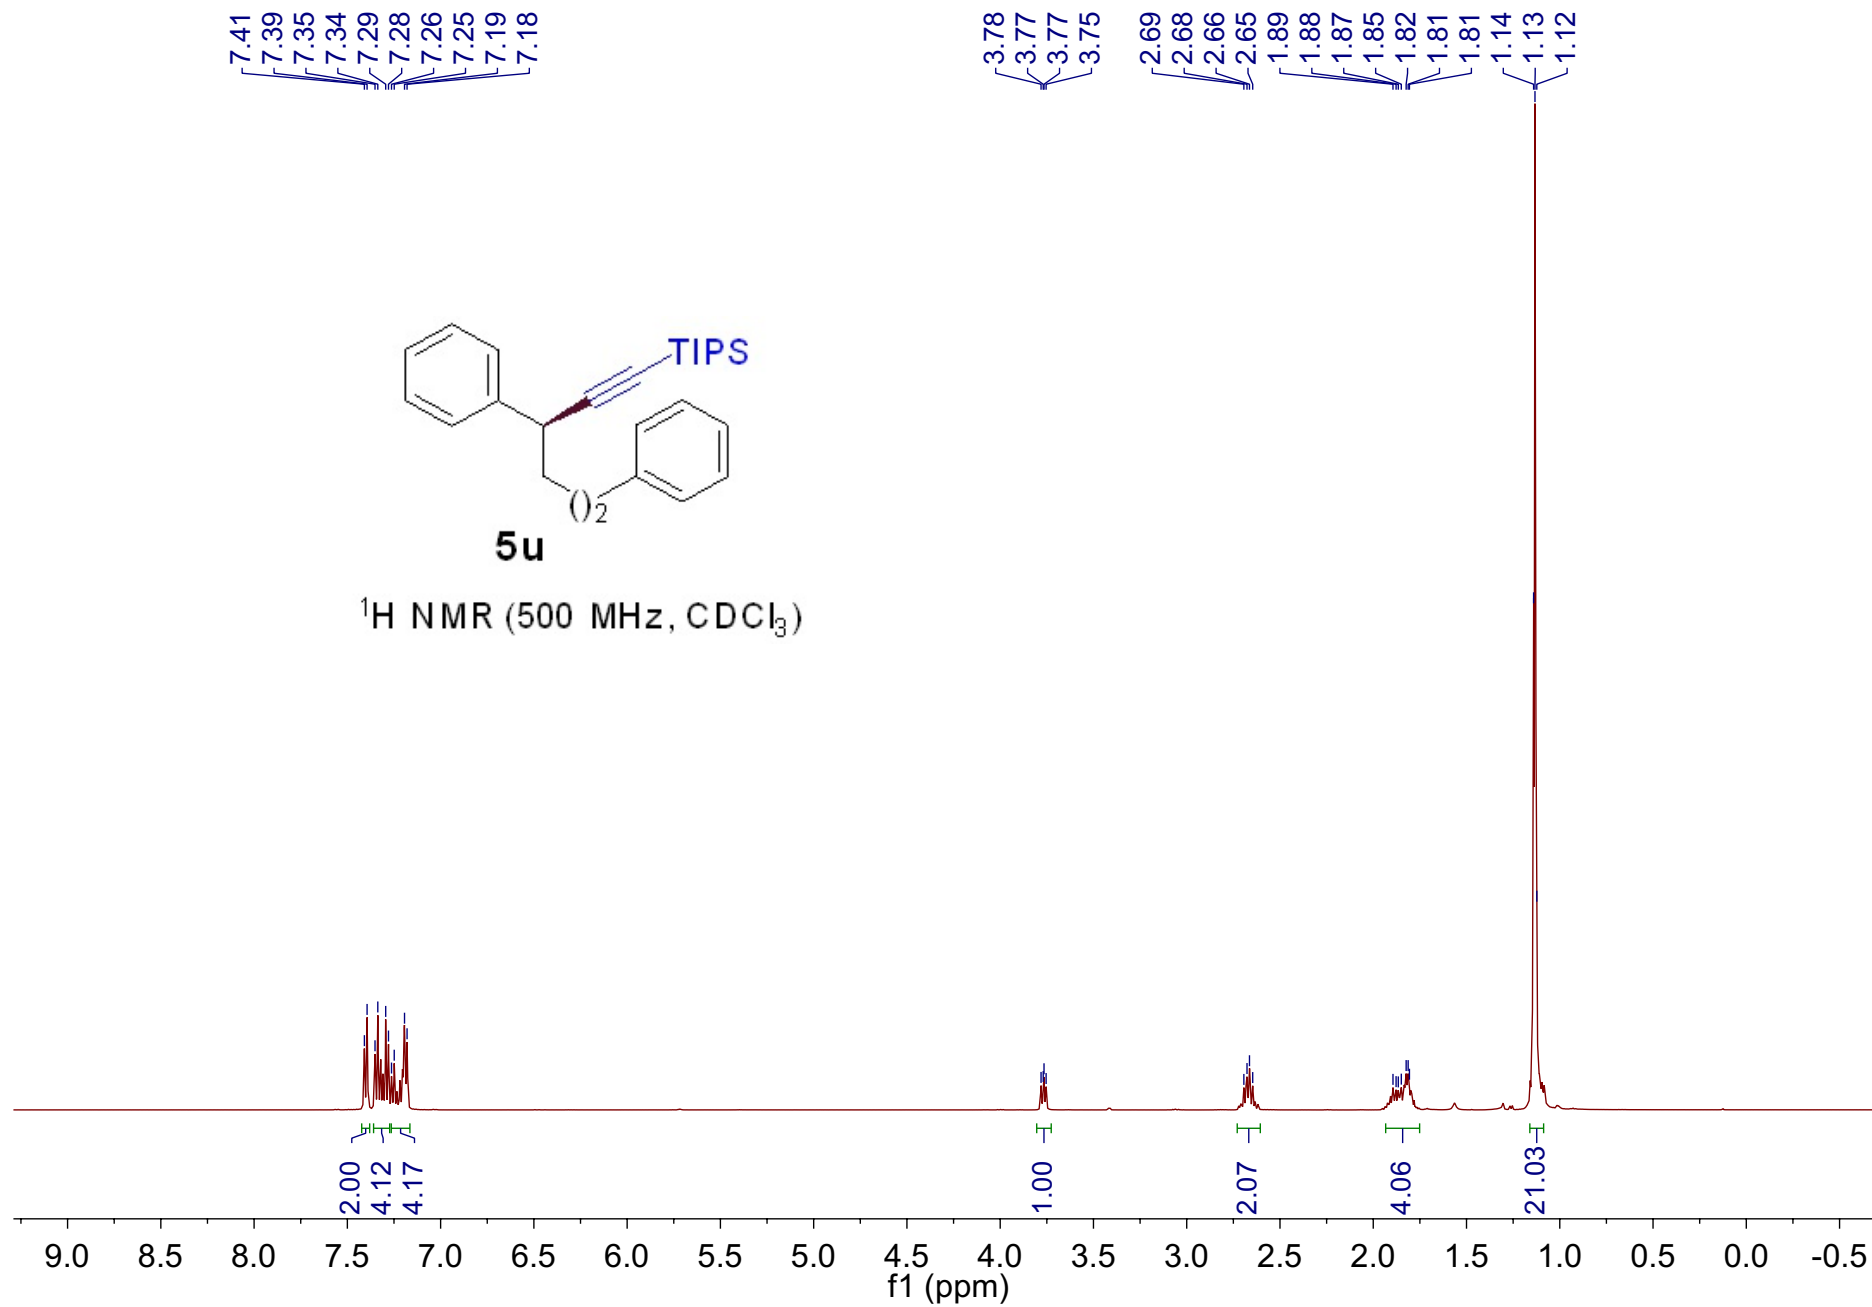

Supplementary Fig. 147.  $^1\text{H NMR}$  (500 MHz,  $\text{CDCl}_3$ ) spectra for compound **5u**

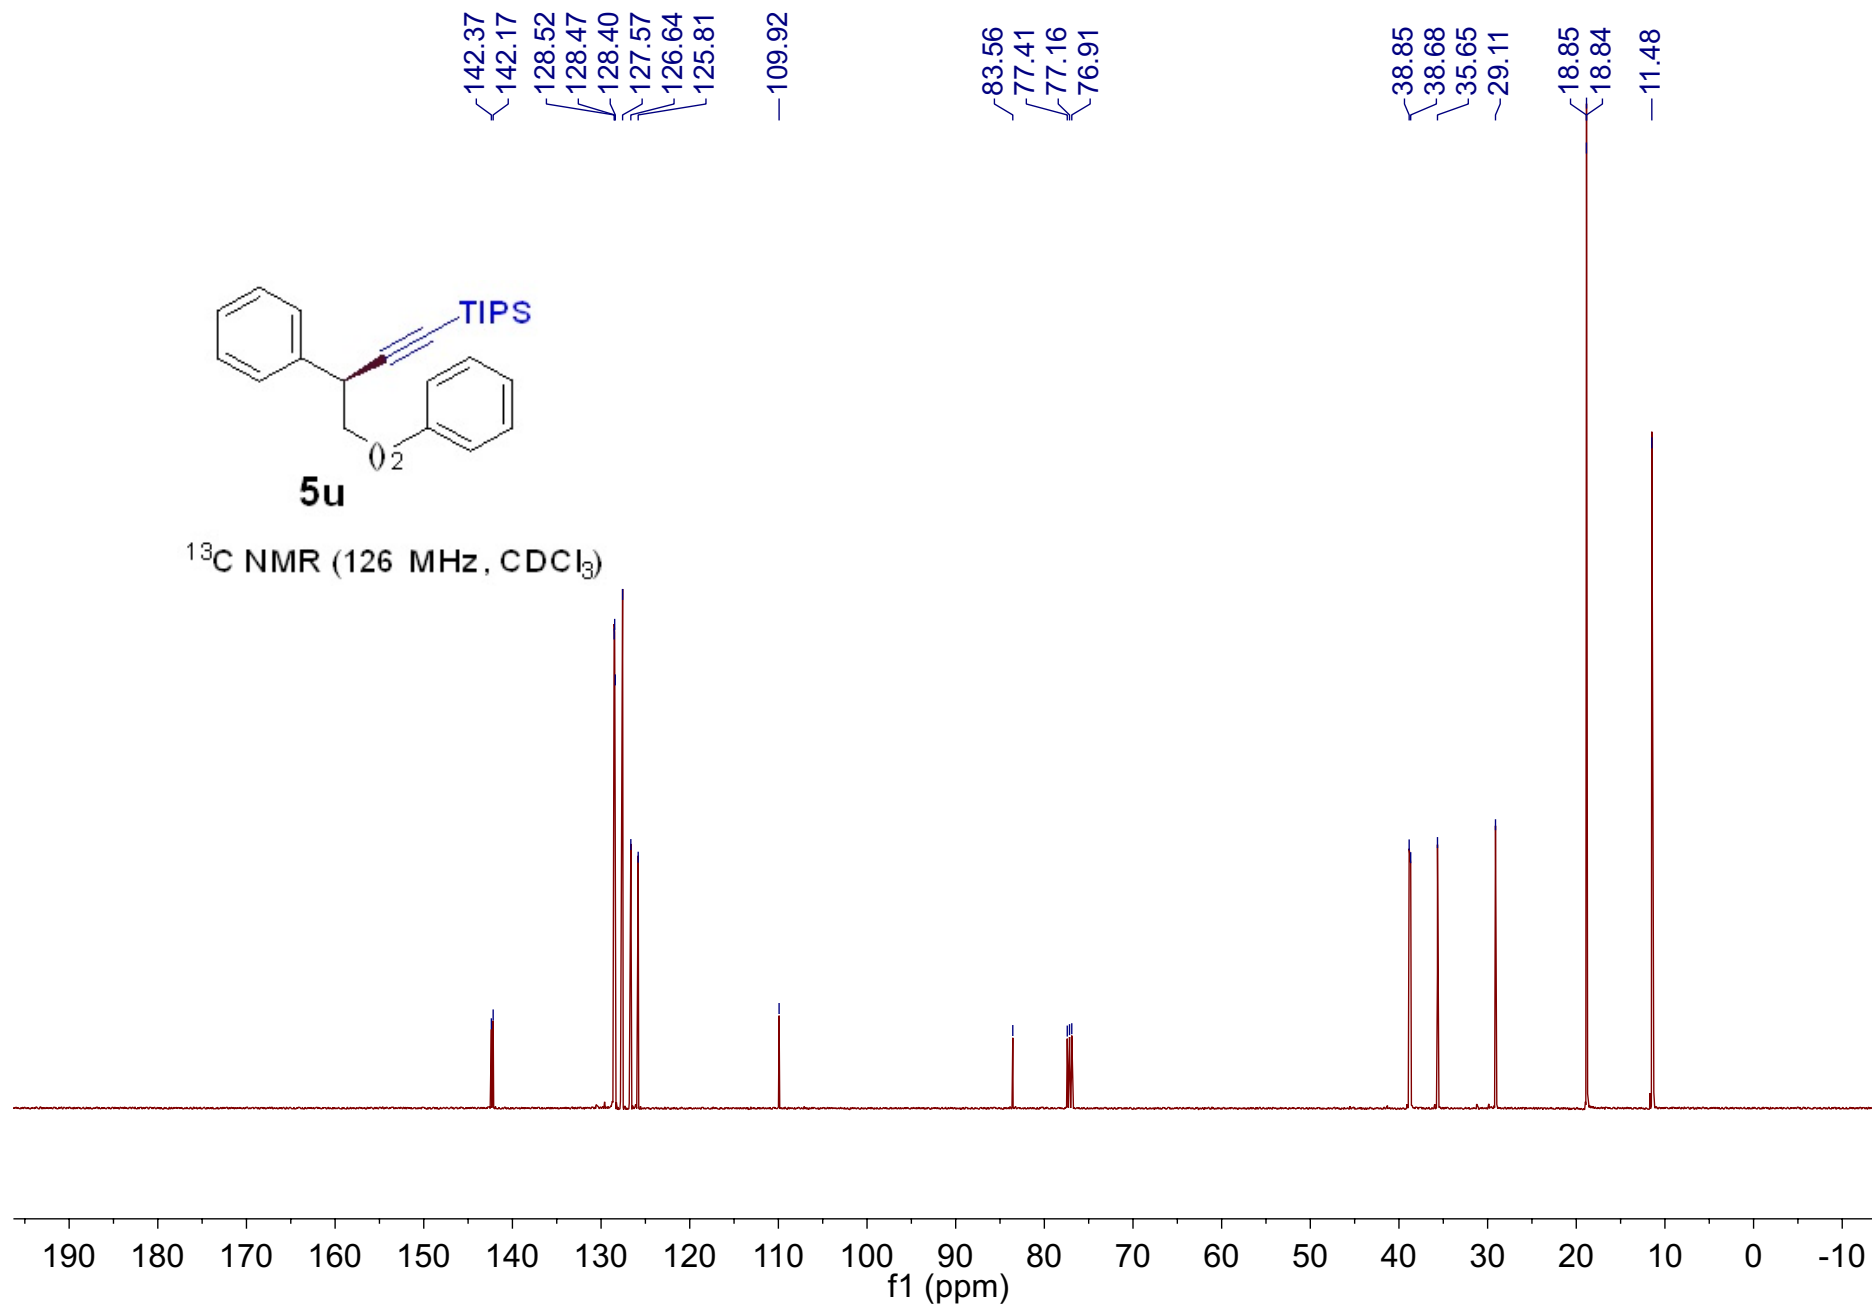

**Supplementary Fig. 148.** <sup>13</sup>C NMR (126 MHz, CDCl<sub>3</sub>) spectra for compound **5u**



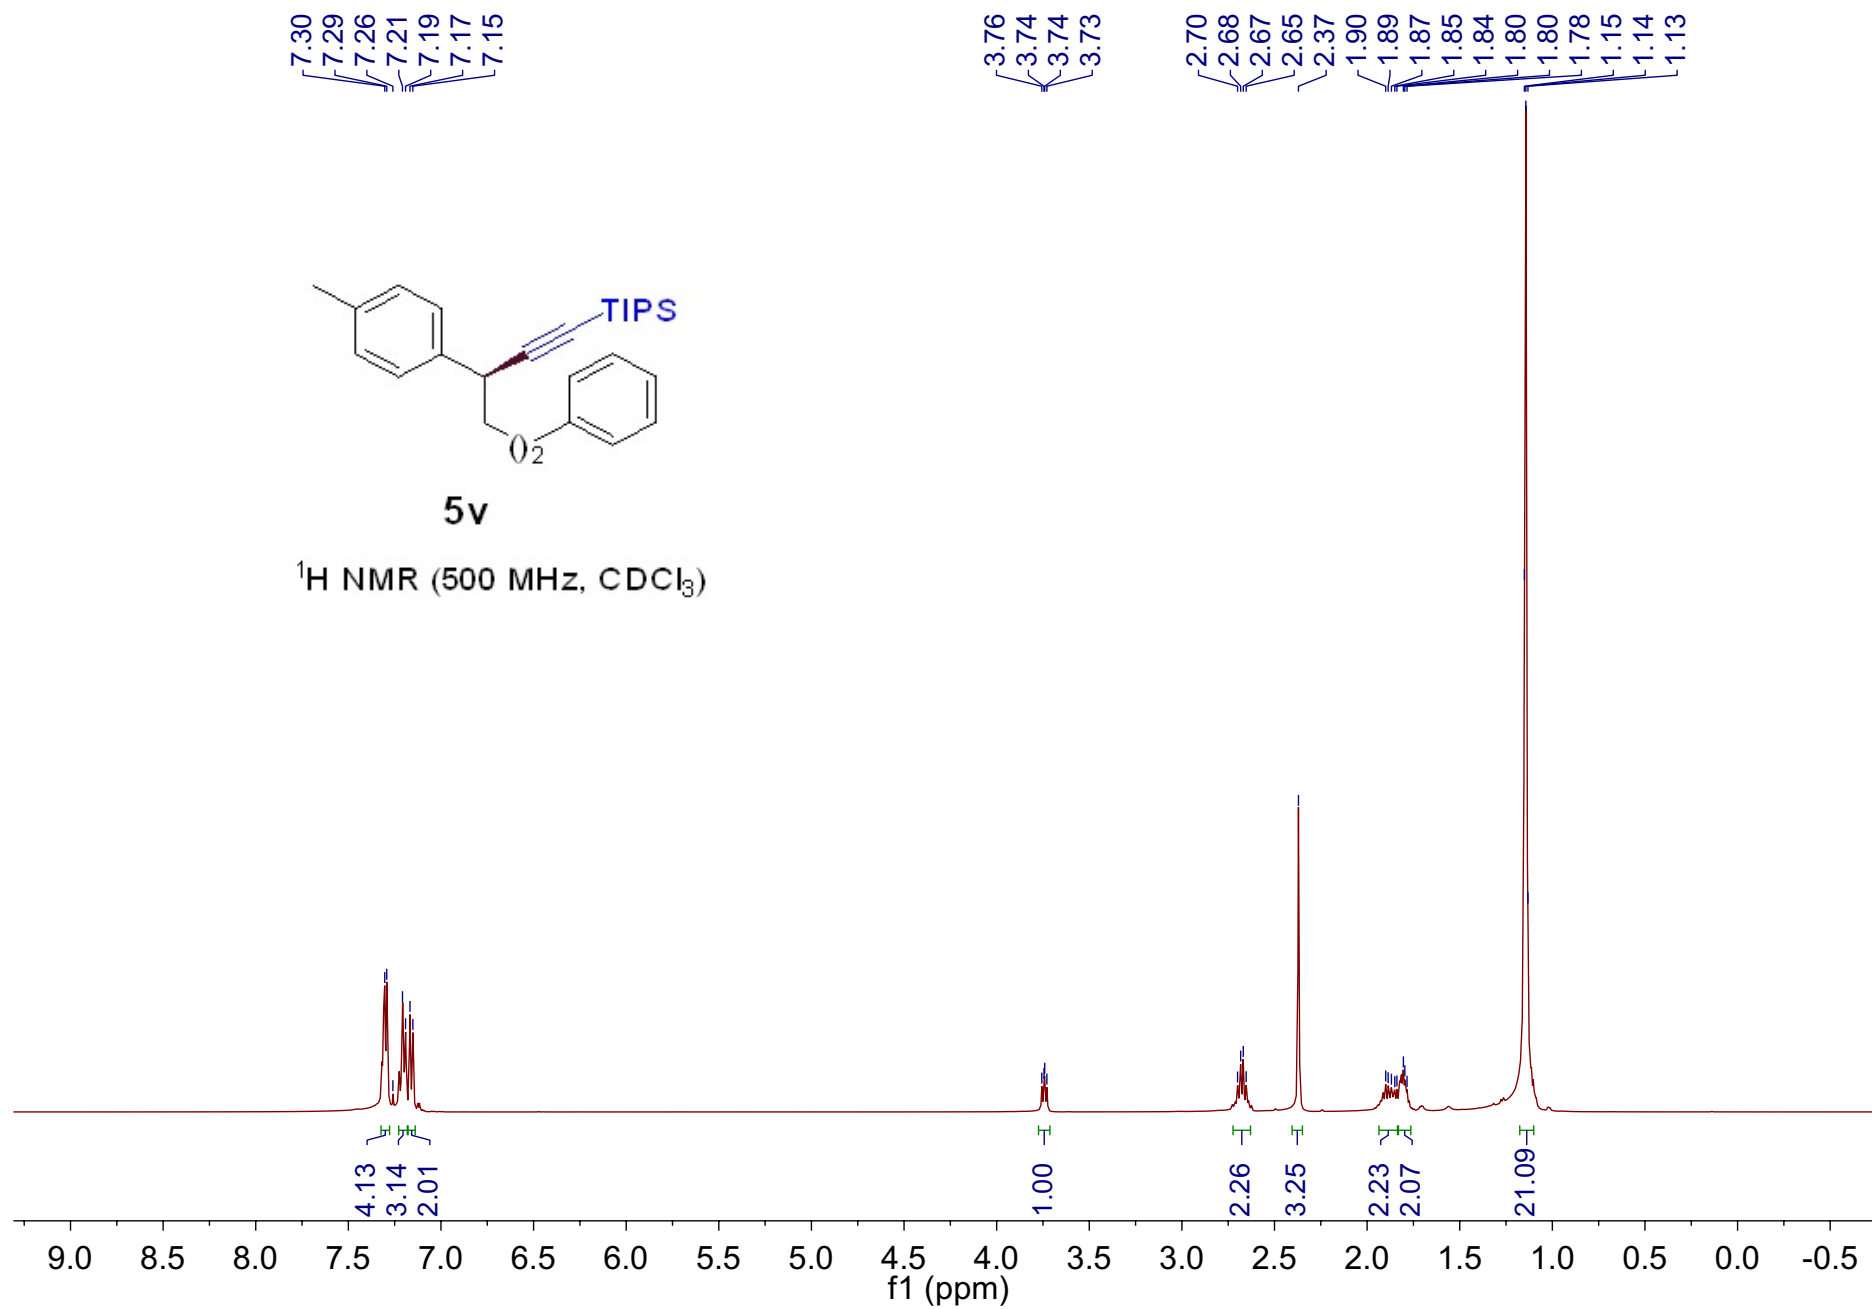

**Supplementary Fig. 149.**  $^1\text{H}$  NMR (500 MHz,  $\text{CDCl}_3$ ) spectra for compound **5v**

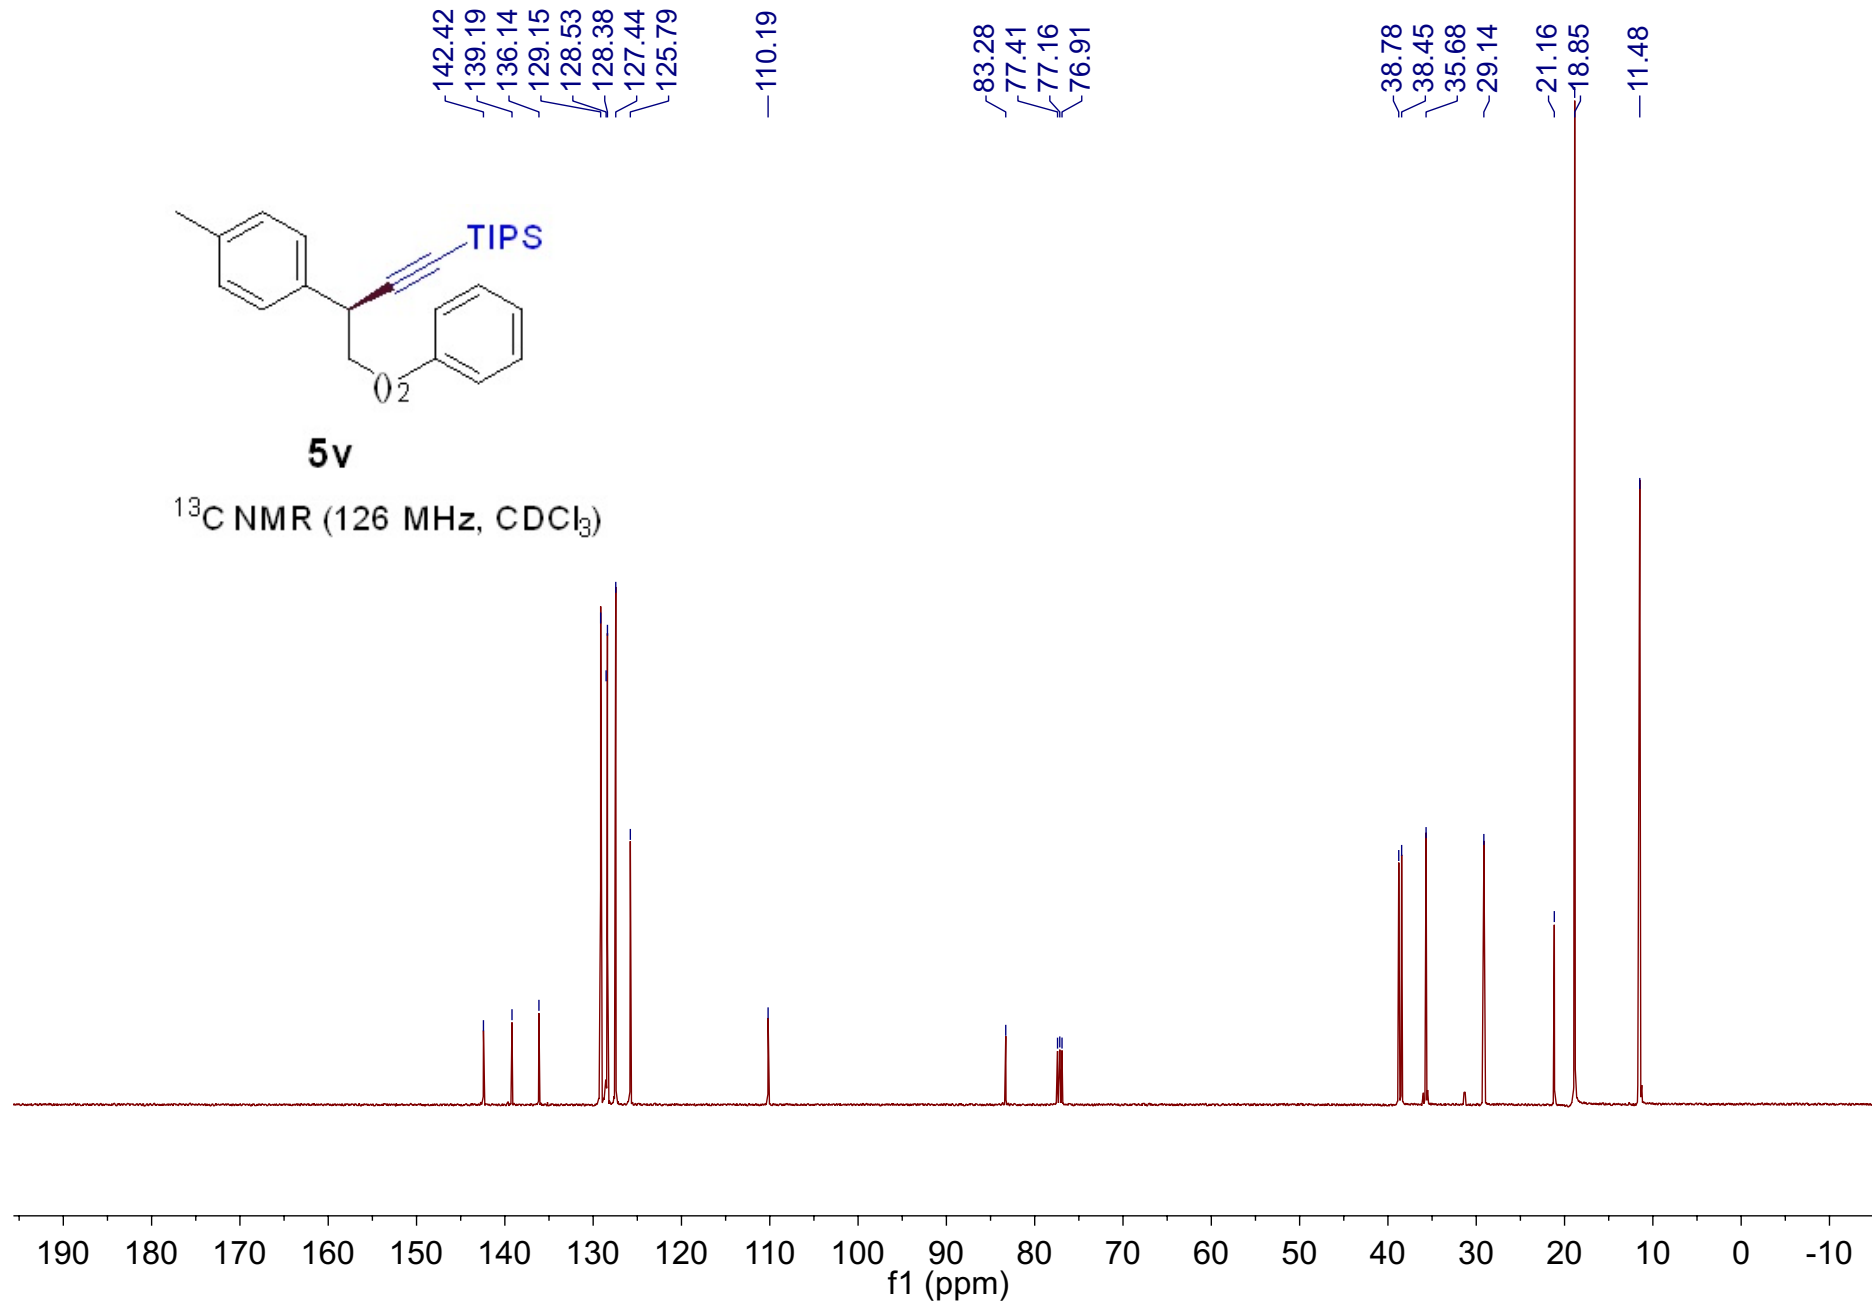

**Supplementary Fig. 150.** <sup>13</sup>C NMR (126 MHz, CDCl<sub>3</sub>) spectra for compound **5v**

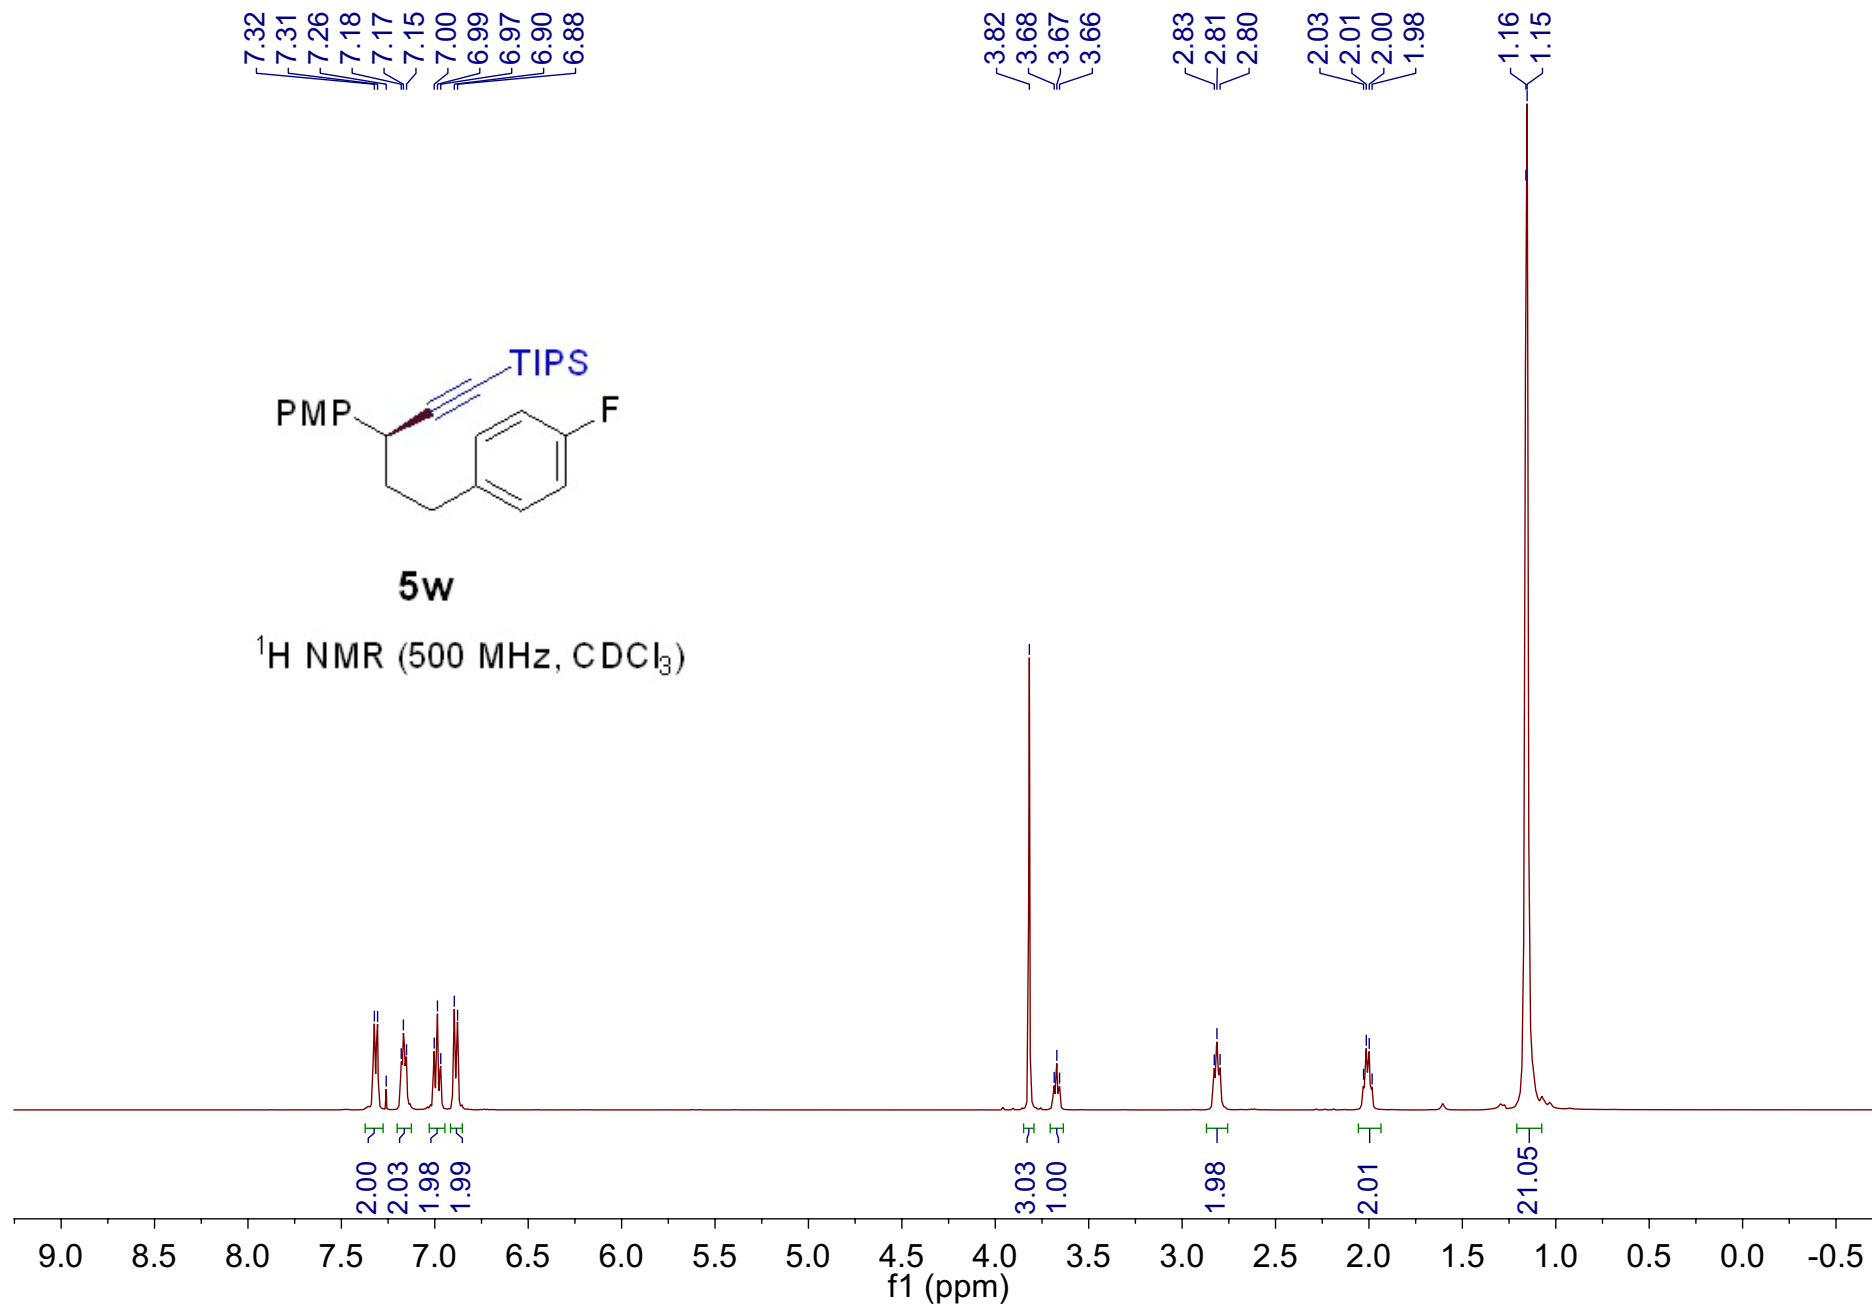

Supplementary Fig. 151.  $^1\text{H NMR}$  (500 MHz,  $\text{CDCl}_3$ ) spectra for compound **5w**

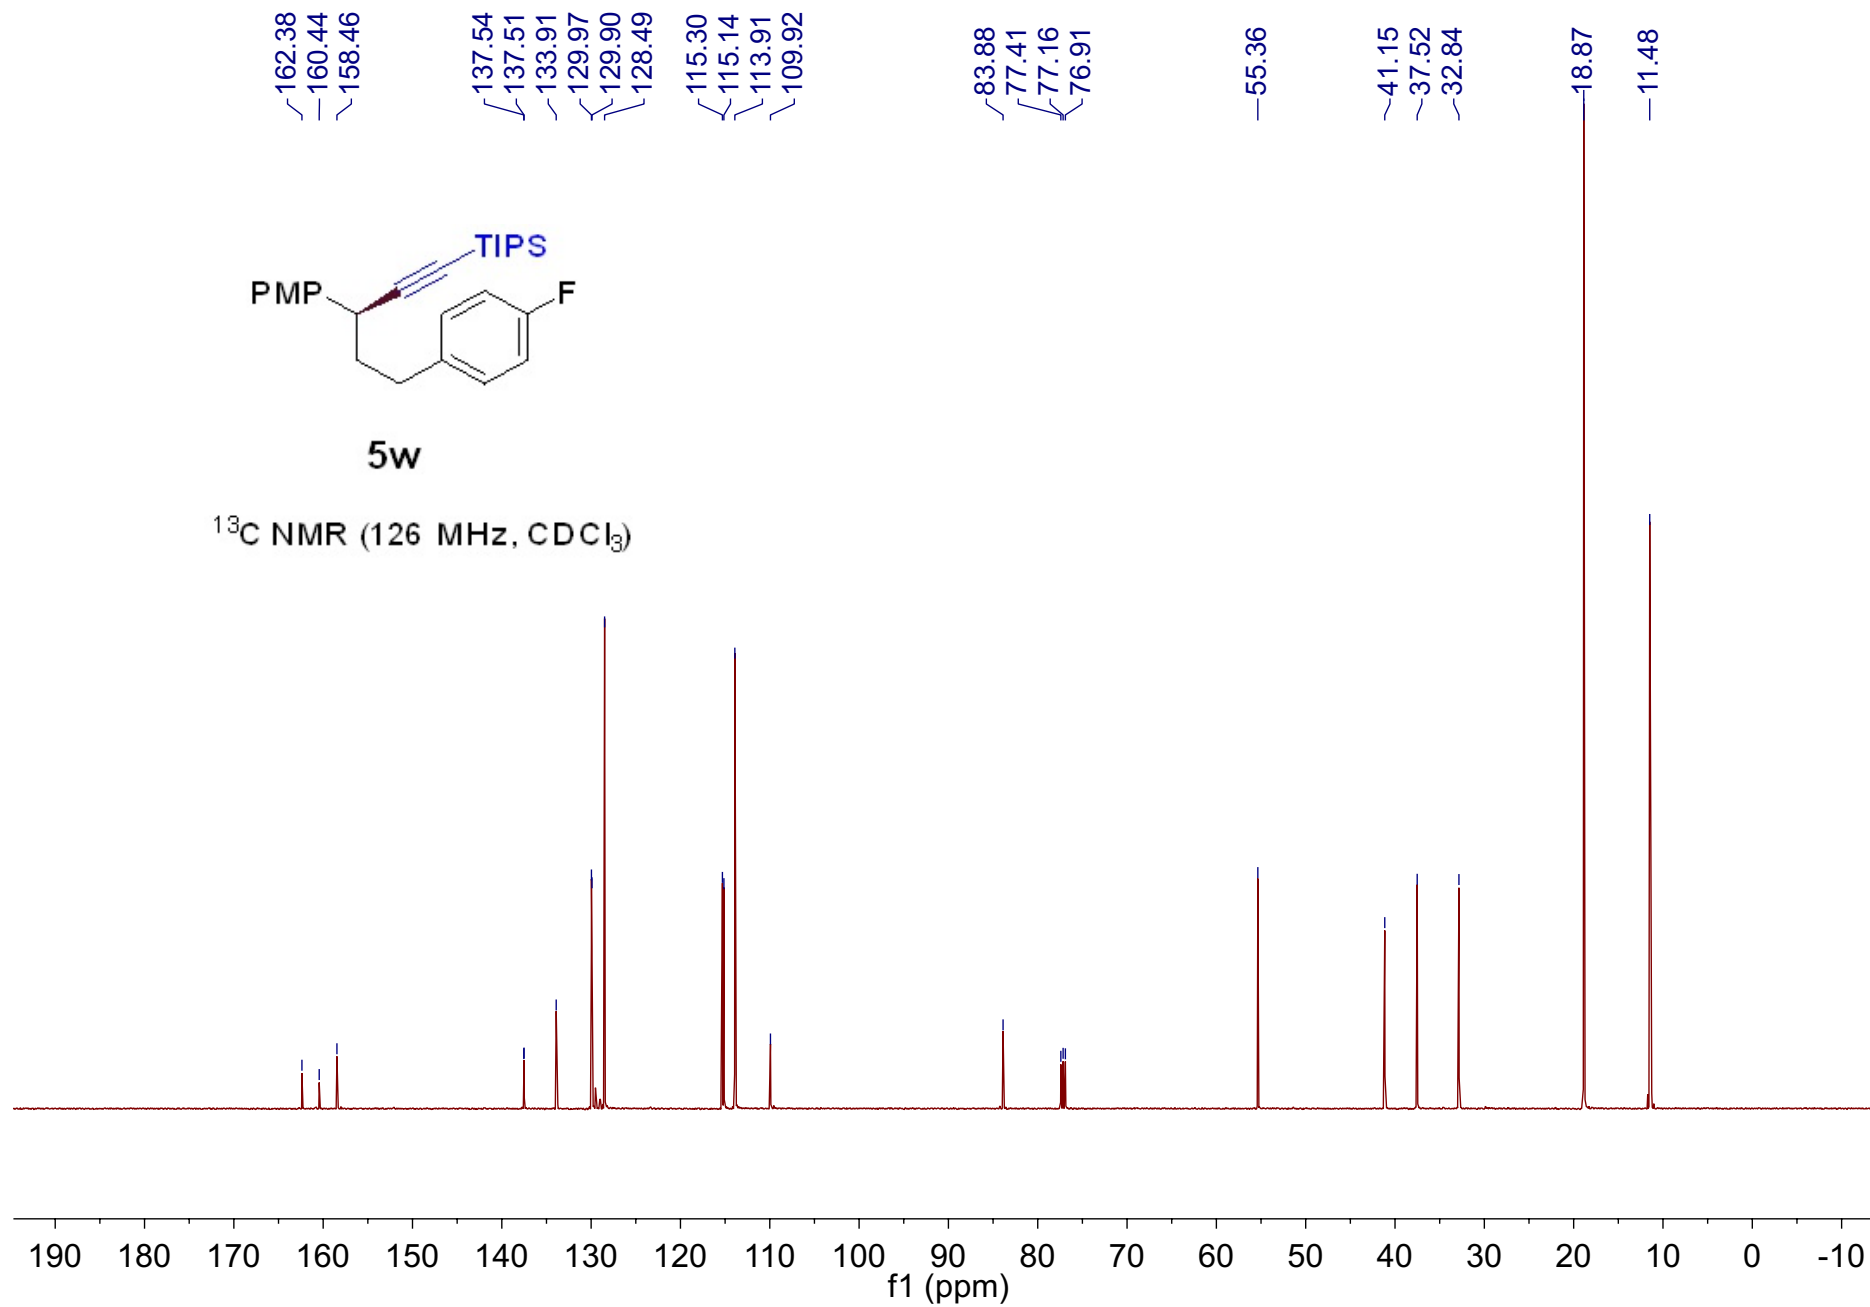

**Supplementary Fig. 152.**  $^{13}\text{C}$  NMR (126 MHz,  $\text{CDCl}_3$ ) spectra for compound **5w**

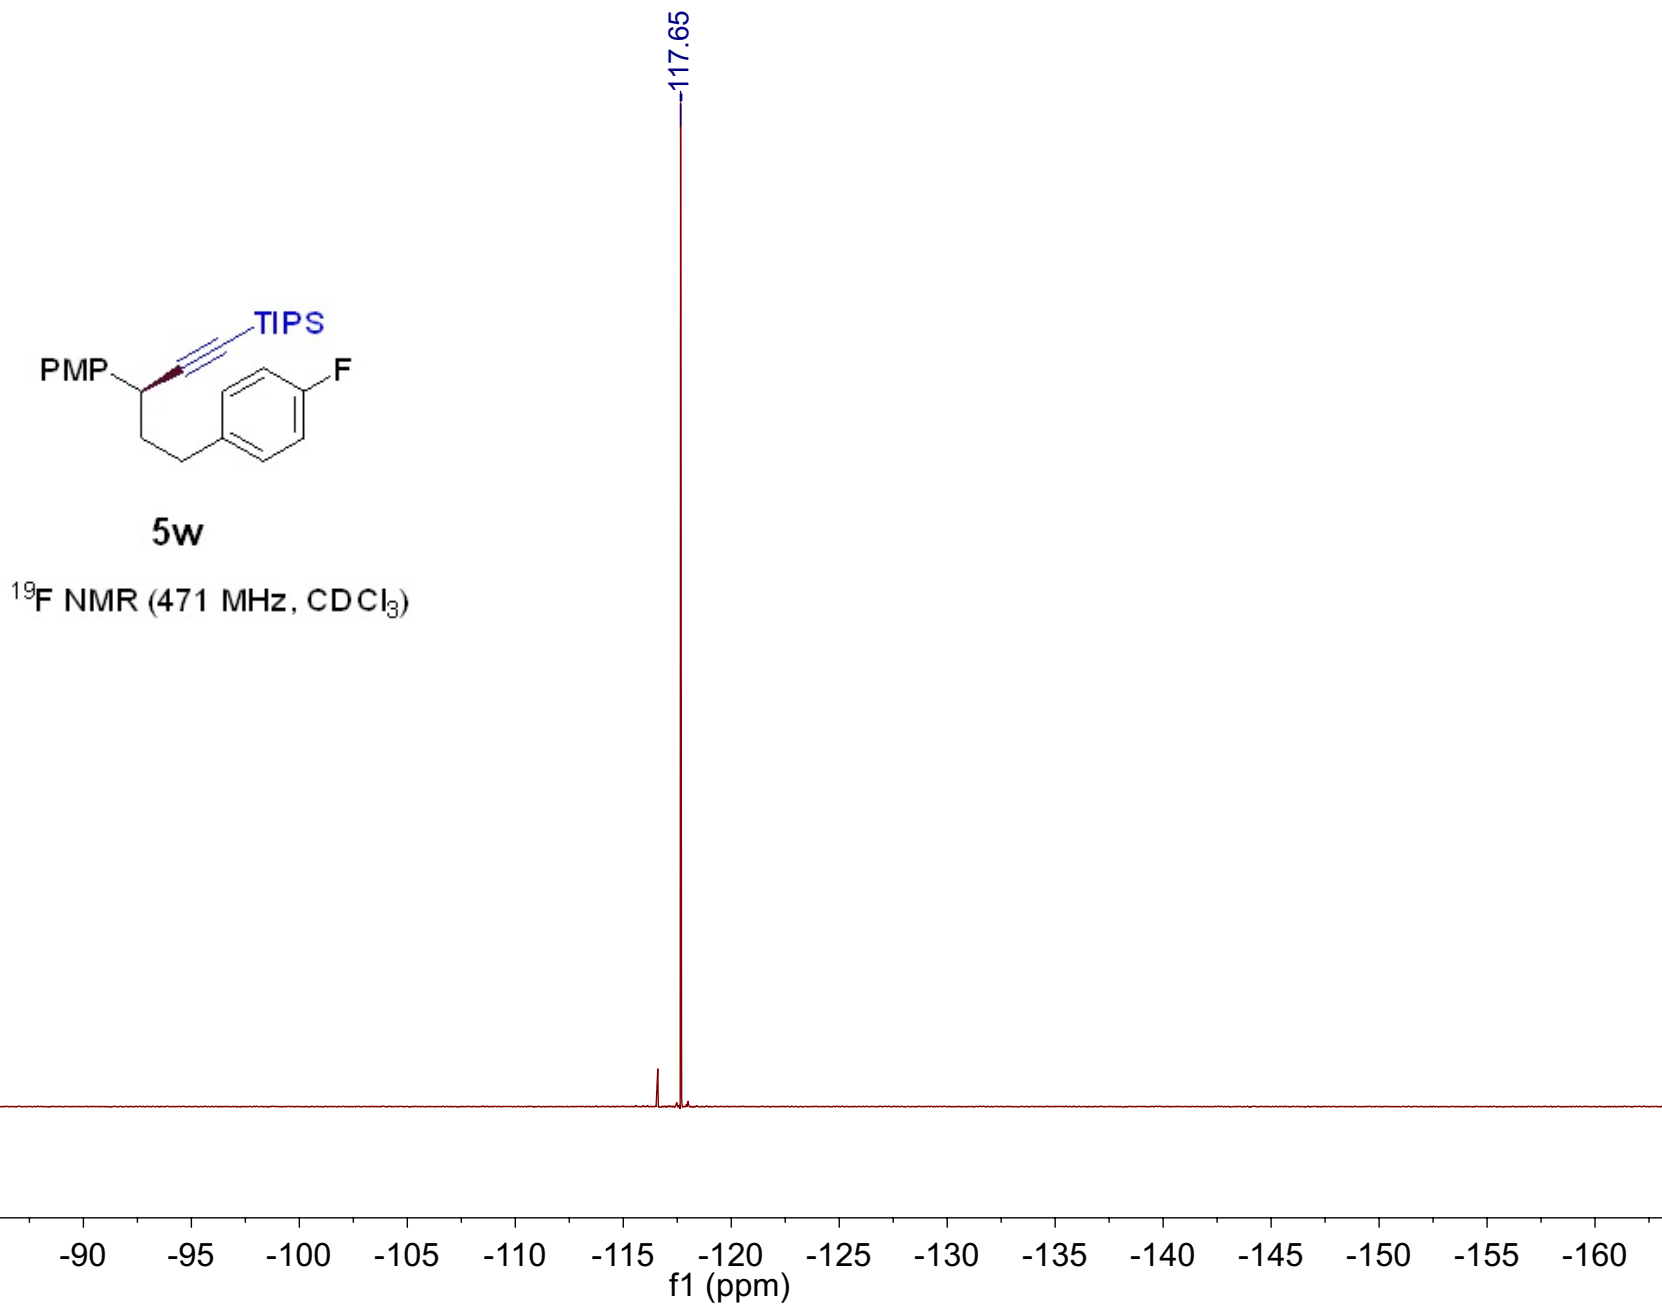

**Supplementary Fig. 153.**  $^{19}\text{F}$  NMR (471 MHz,  $\text{CDCl}_3$ ) spectra for compound **5w**

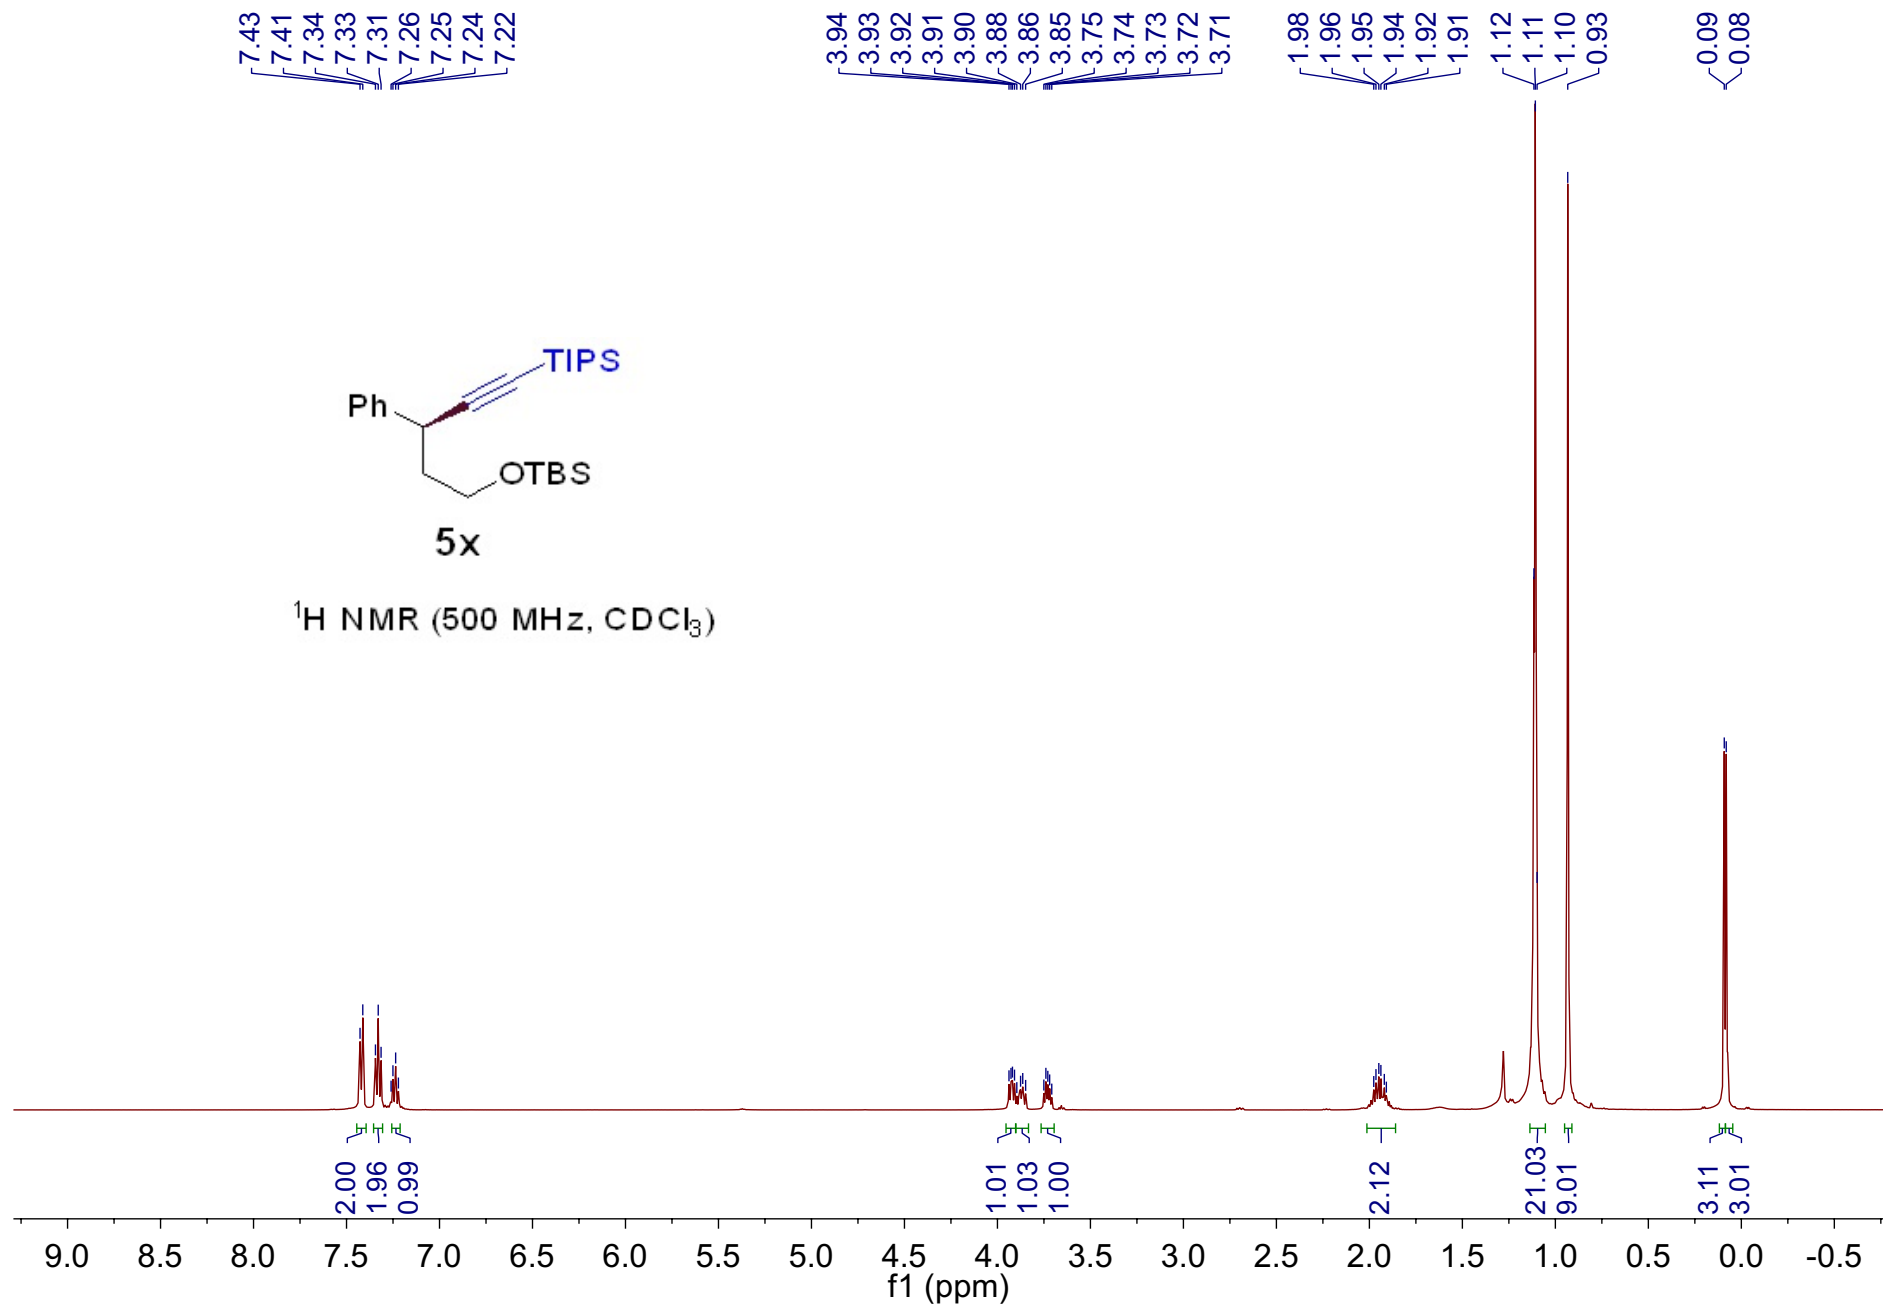

**Supplementary Fig. 154.**  $^1\text{H NMR}$  (500 MHz,  $\text{CDCl}_3$ ) spectra for compound **5x**

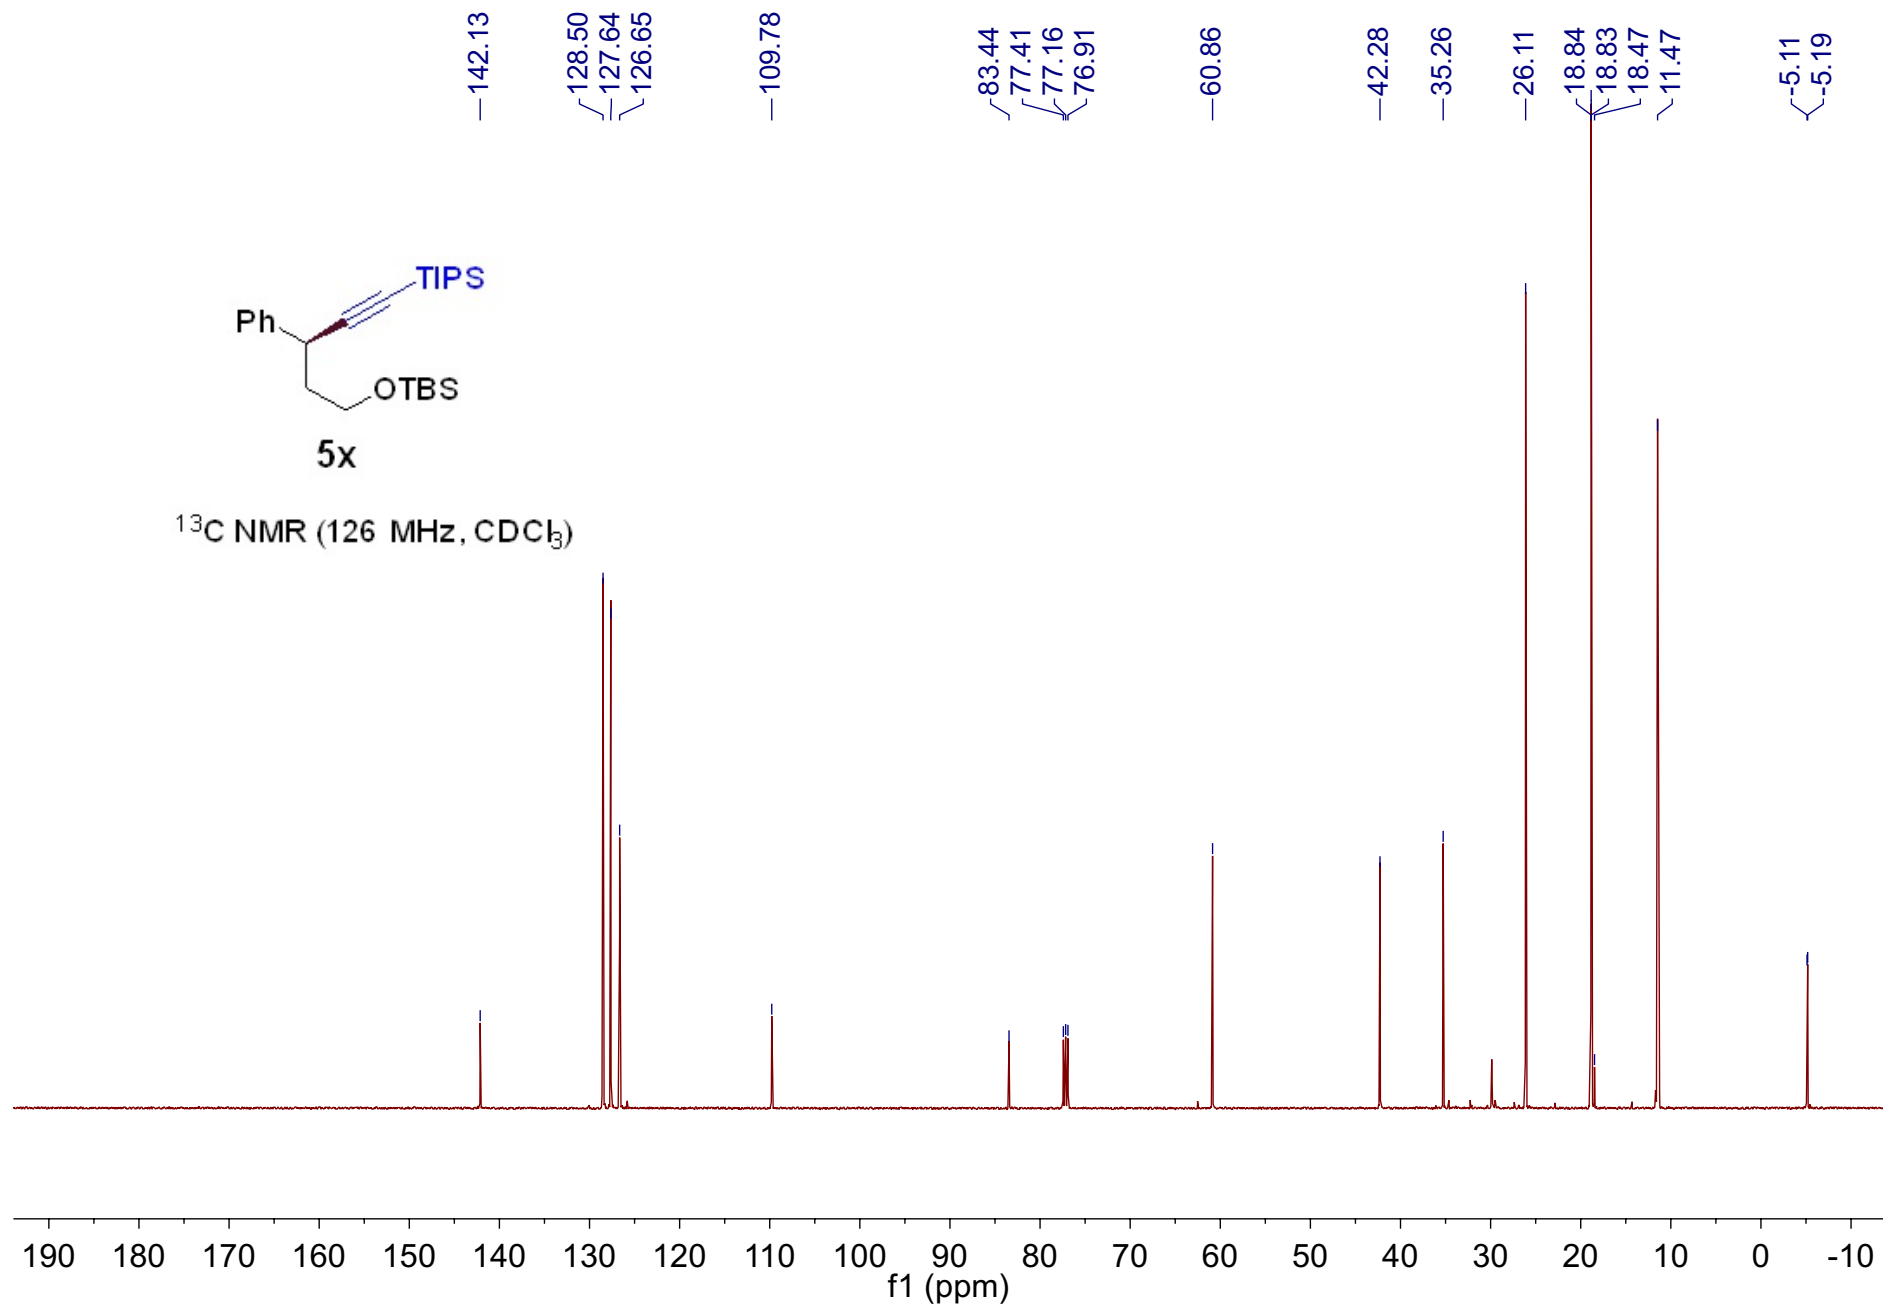

**Supplementary Fig. 155.** <sup>13</sup>C NMR (126 MHz, CDCl<sub>3</sub>) spectra for compound **5x**

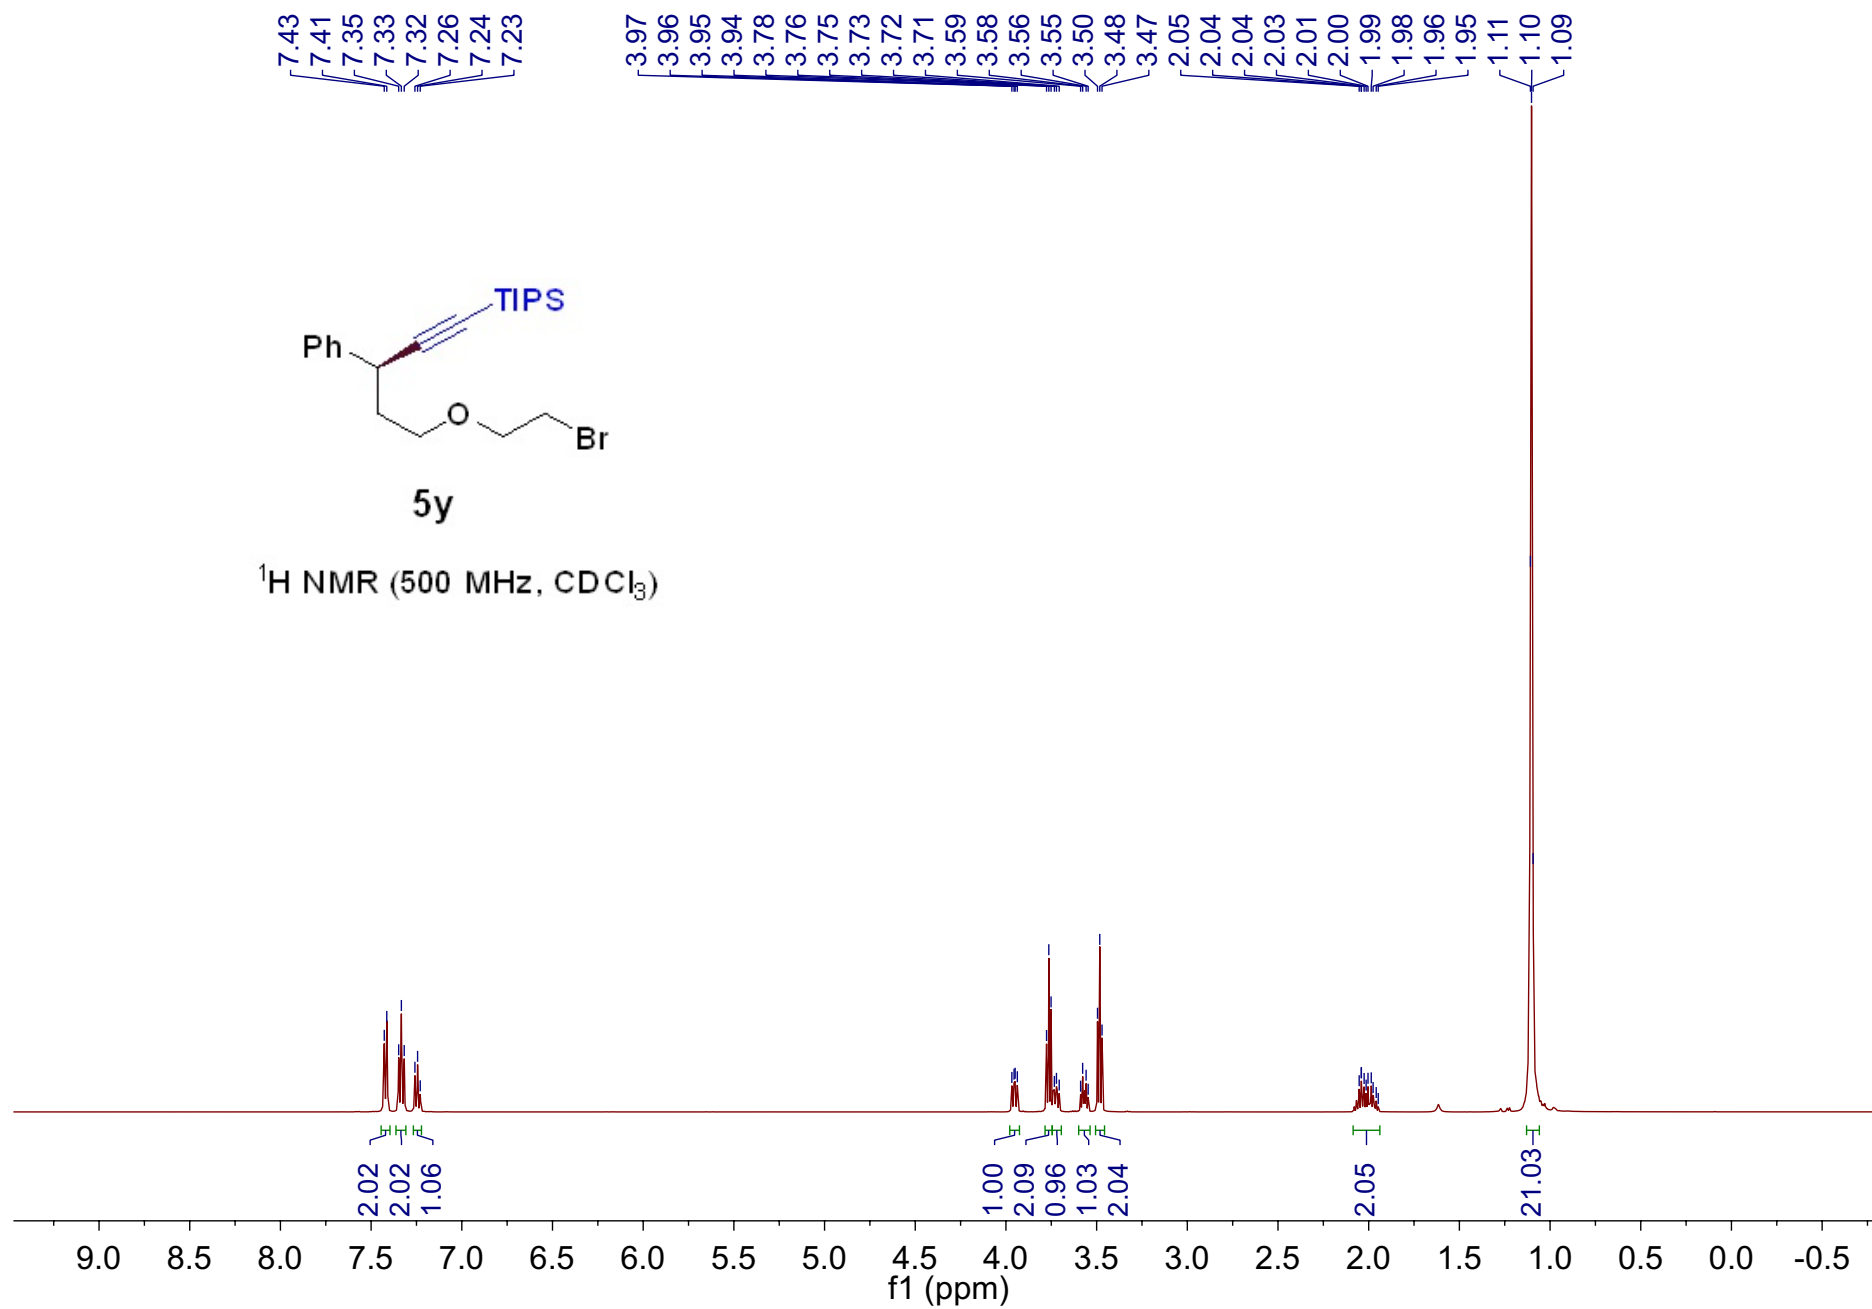

Supplementary Fig. 156. <sup>1</sup>H NMR (500 MHz, CDCl<sub>3</sub>) spectra for compound 5y



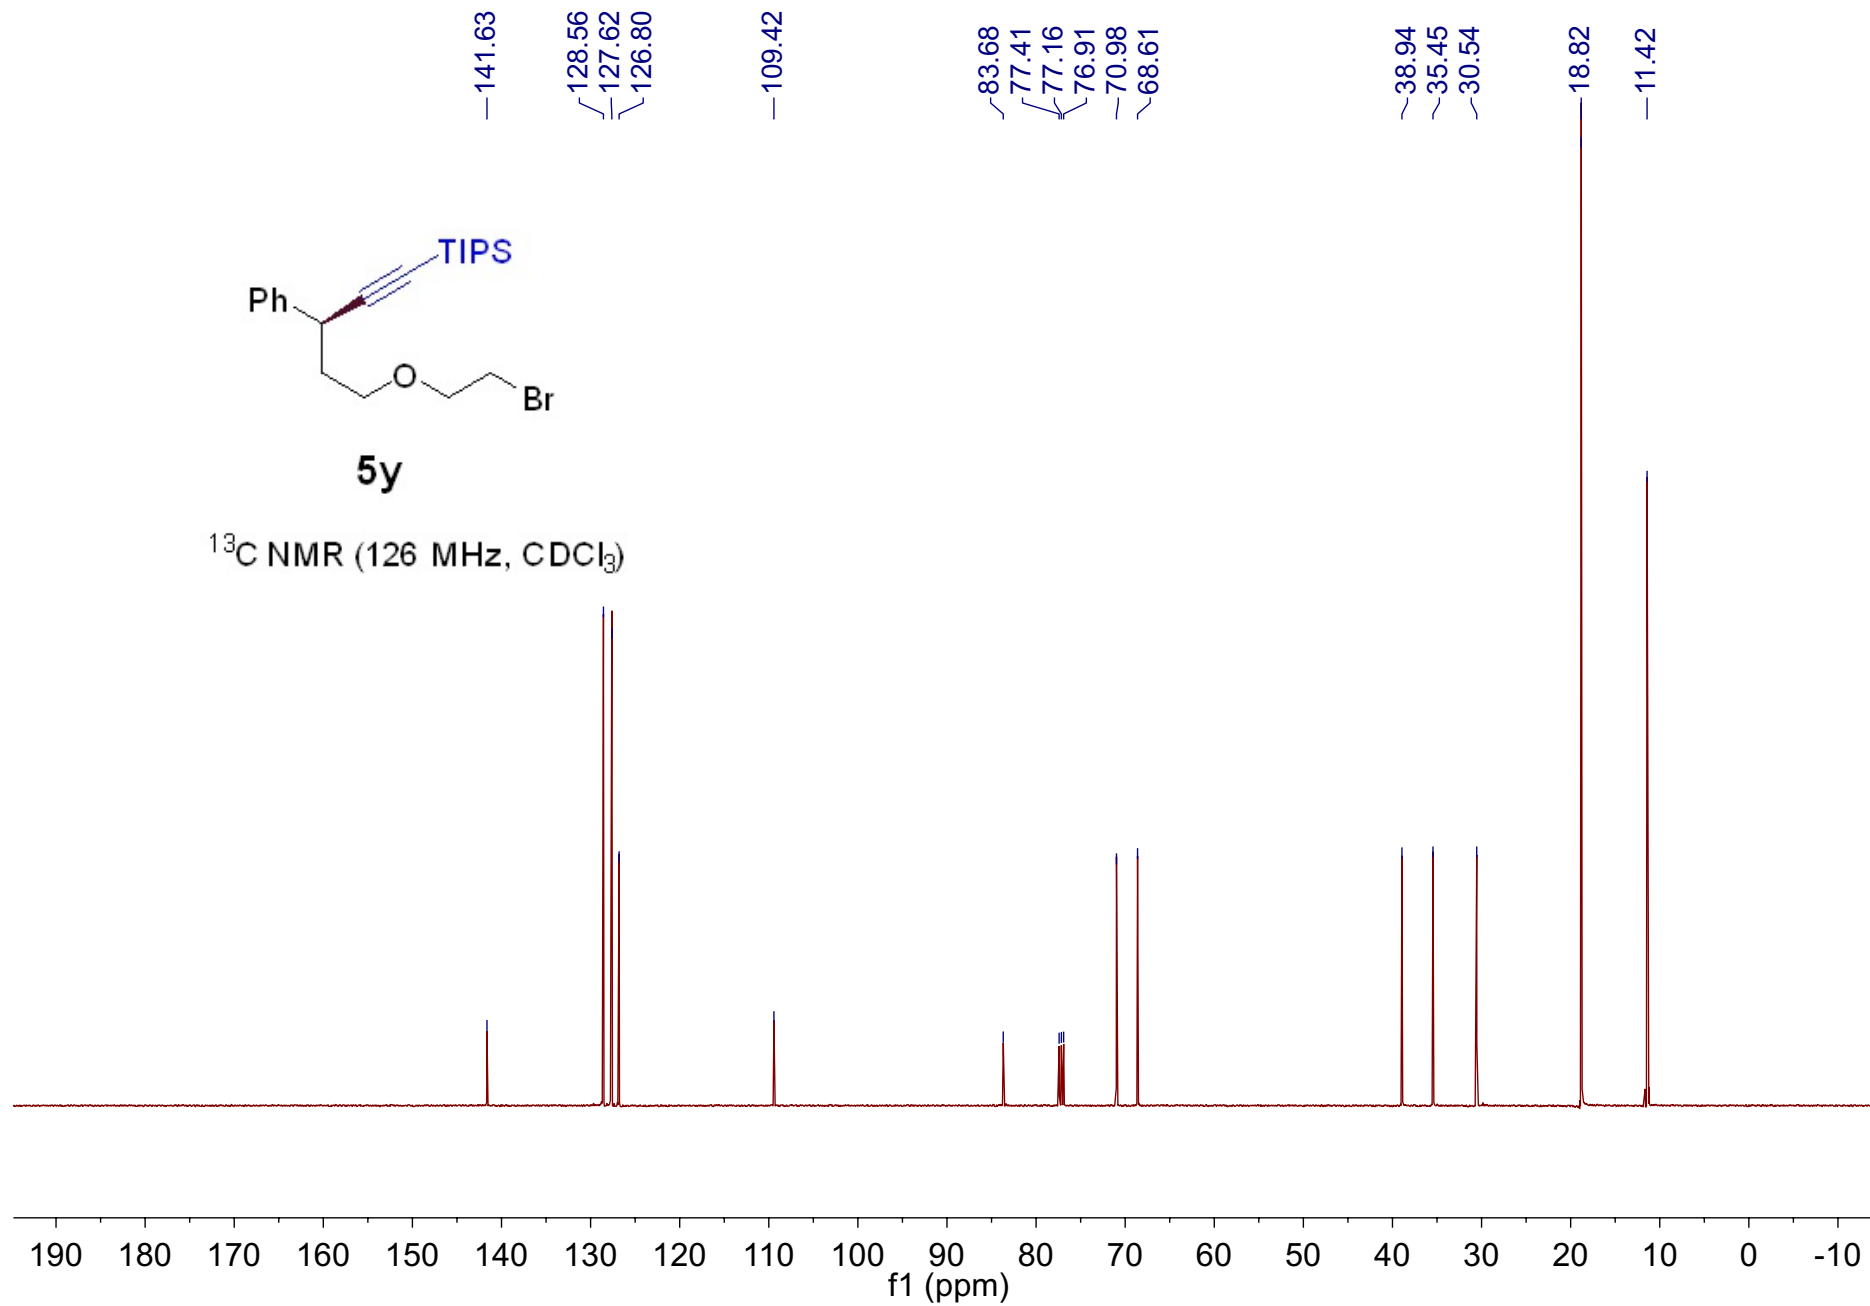

**Supplementary Fig. 157.** <sup>13</sup>C NMR (126 MHz, CDCl<sub>3</sub>) spectra for compound **5y**

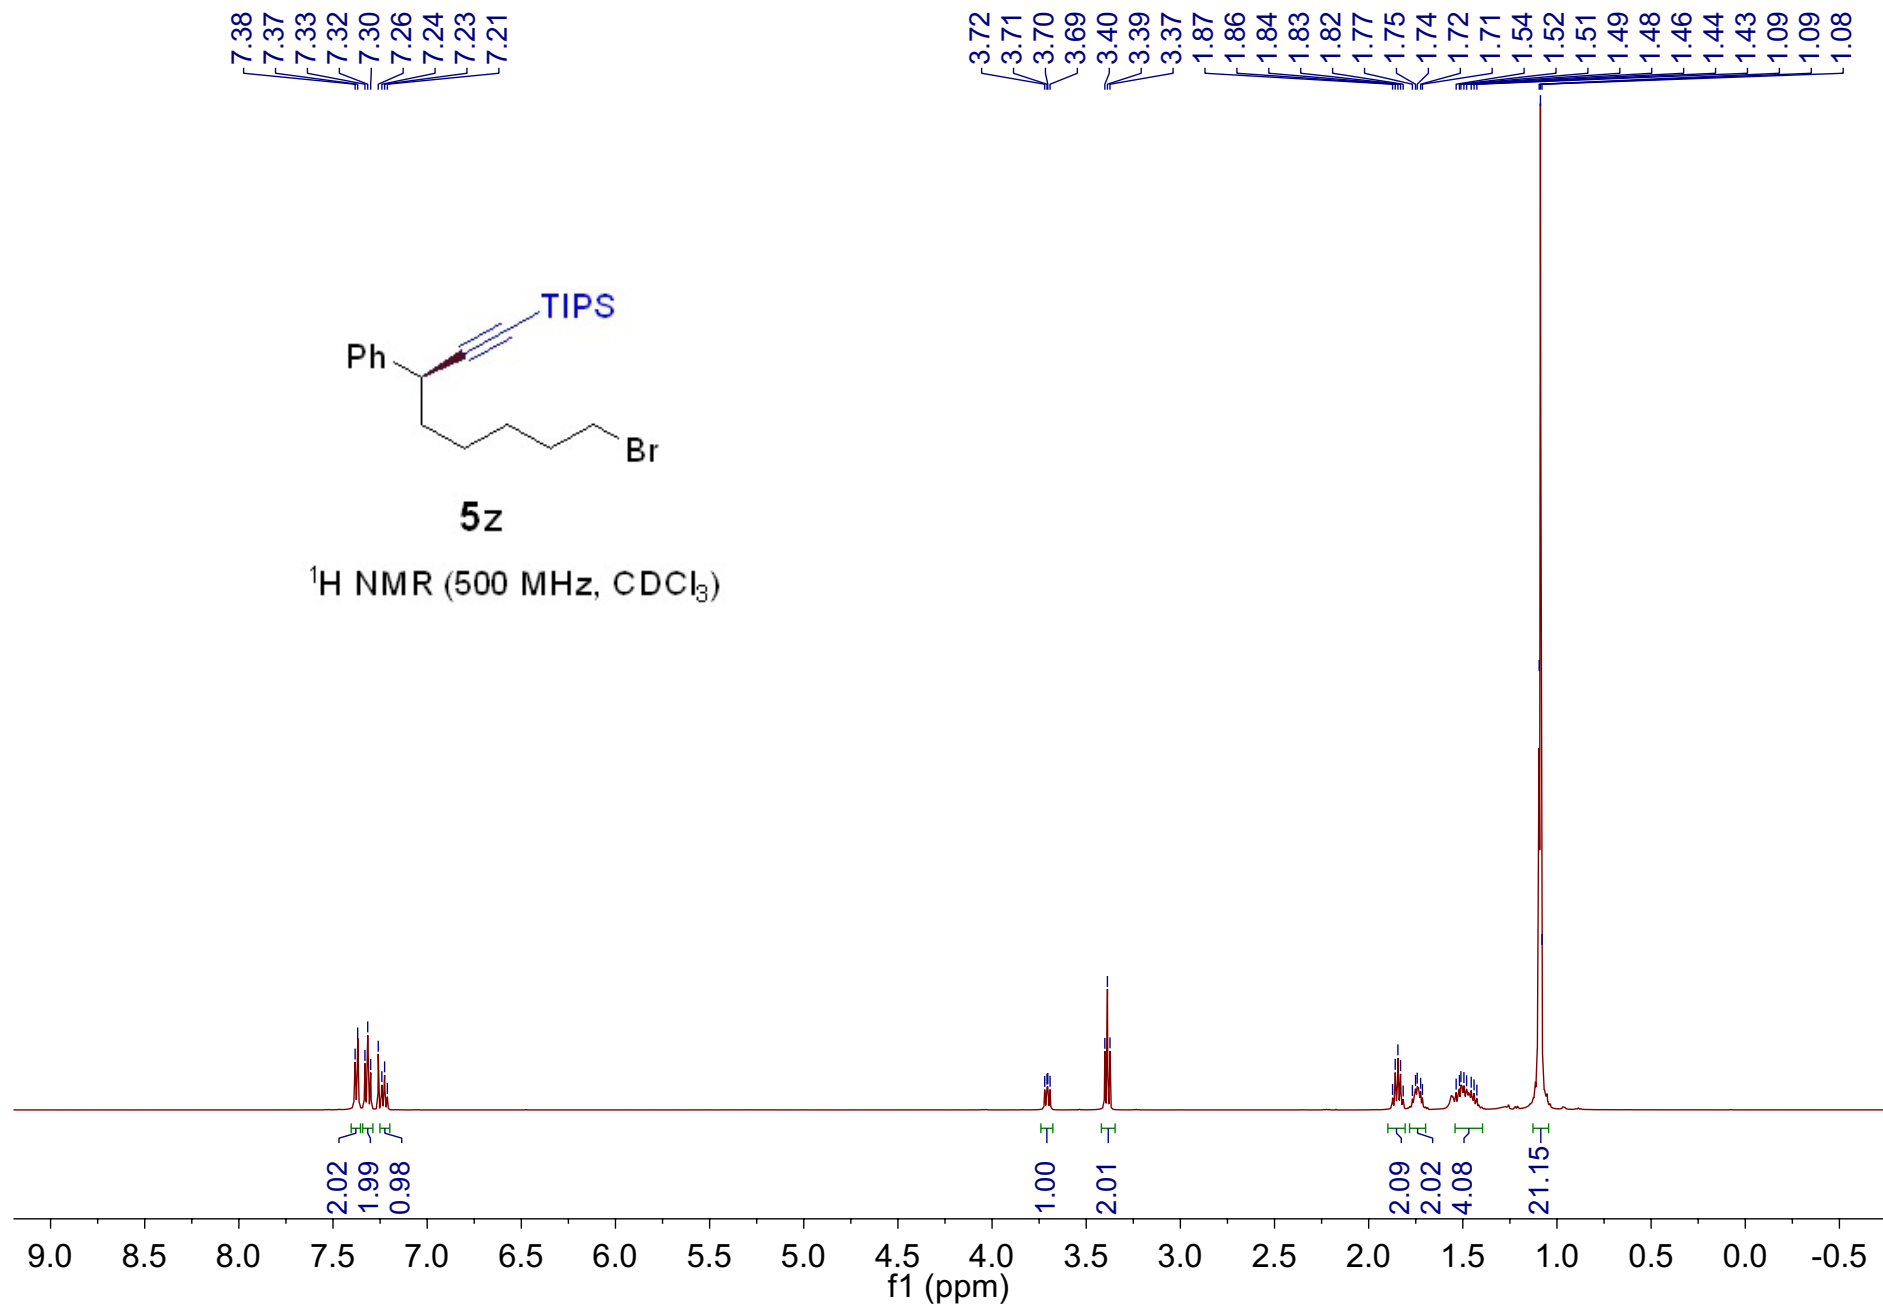

**Supplementary Fig. 158.** <sup>1</sup>H NMR (500 MHz, CDCl<sub>3</sub>) spectra for compound **5z**

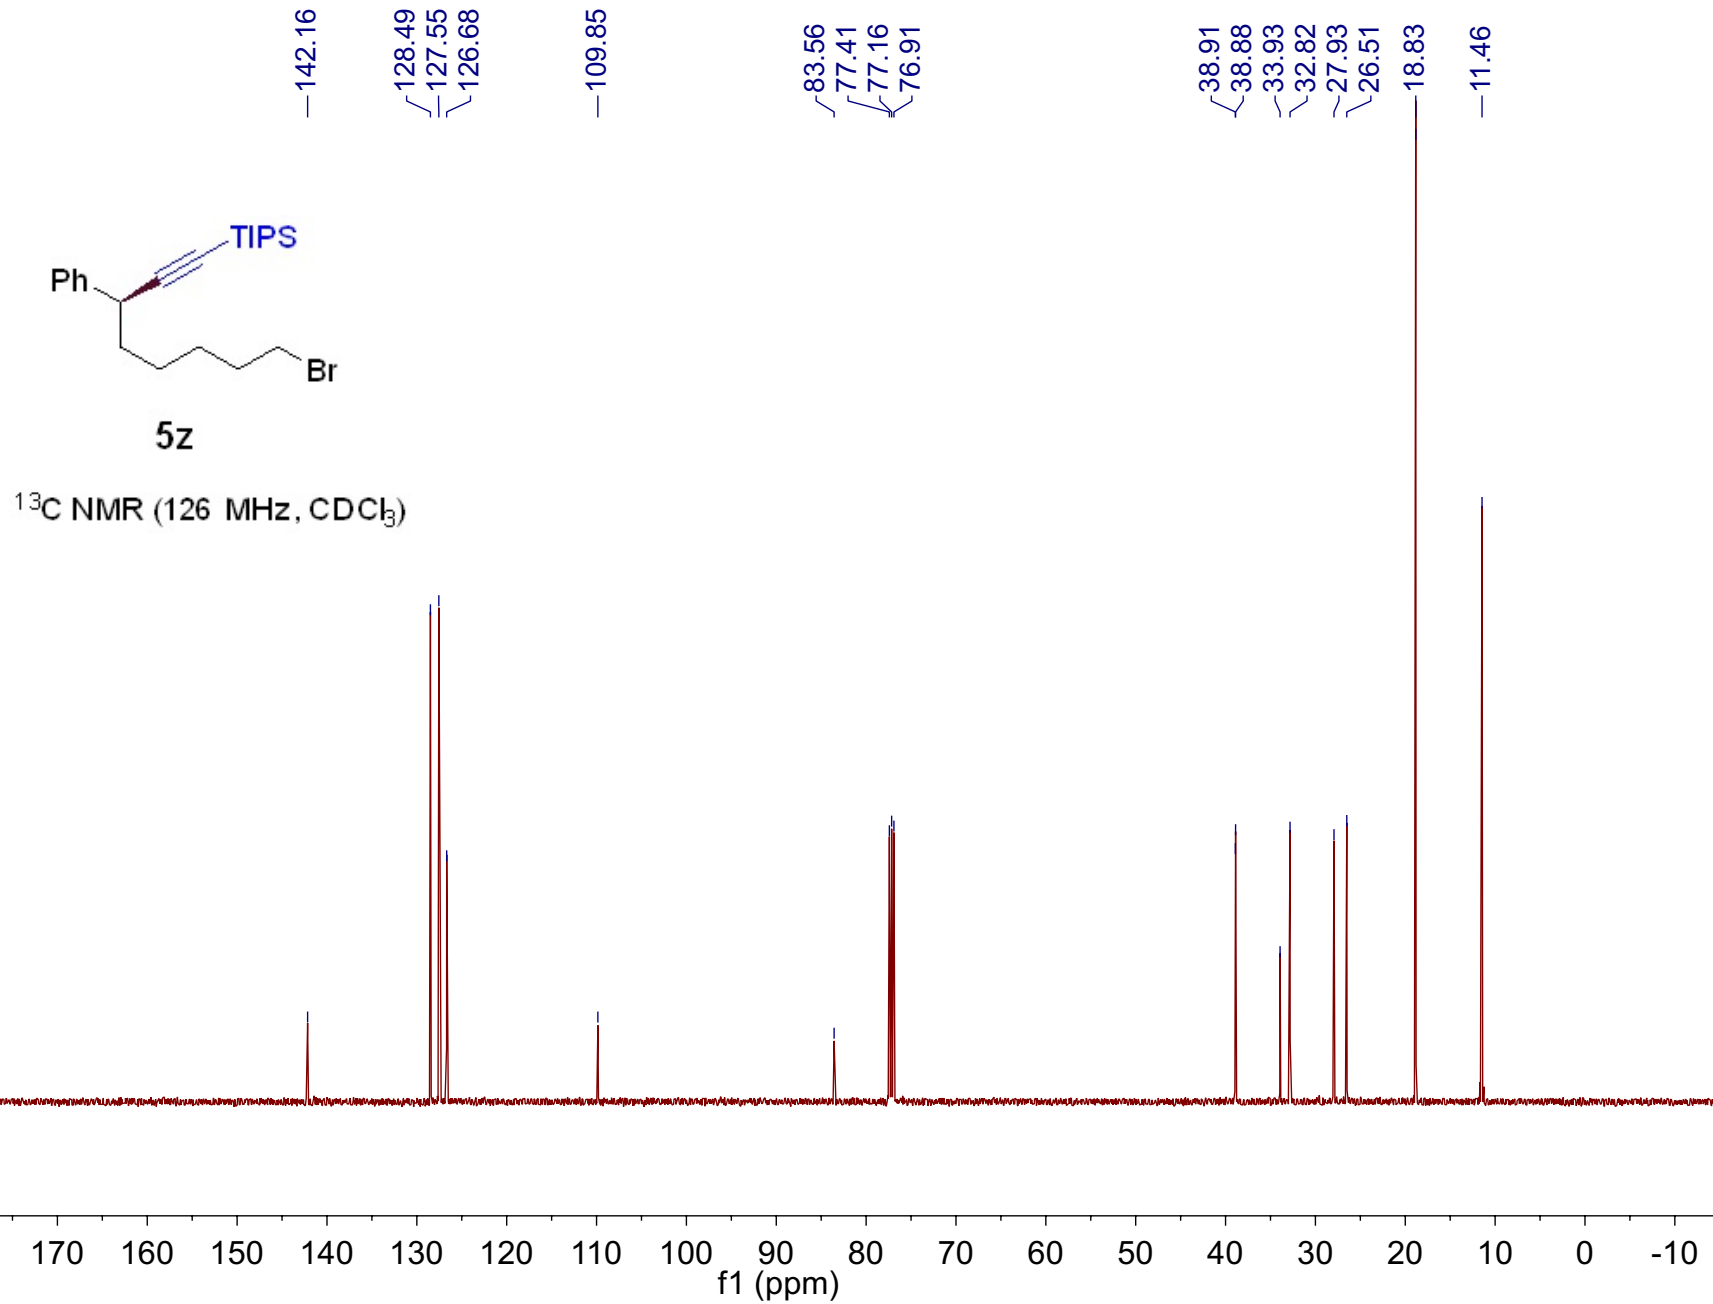

**Supplementary Fig. 159.**  $^{13}\text{C}$  NMR (126 MHz,  $\text{CDCl}_3$ ) spectra for compound **5z**

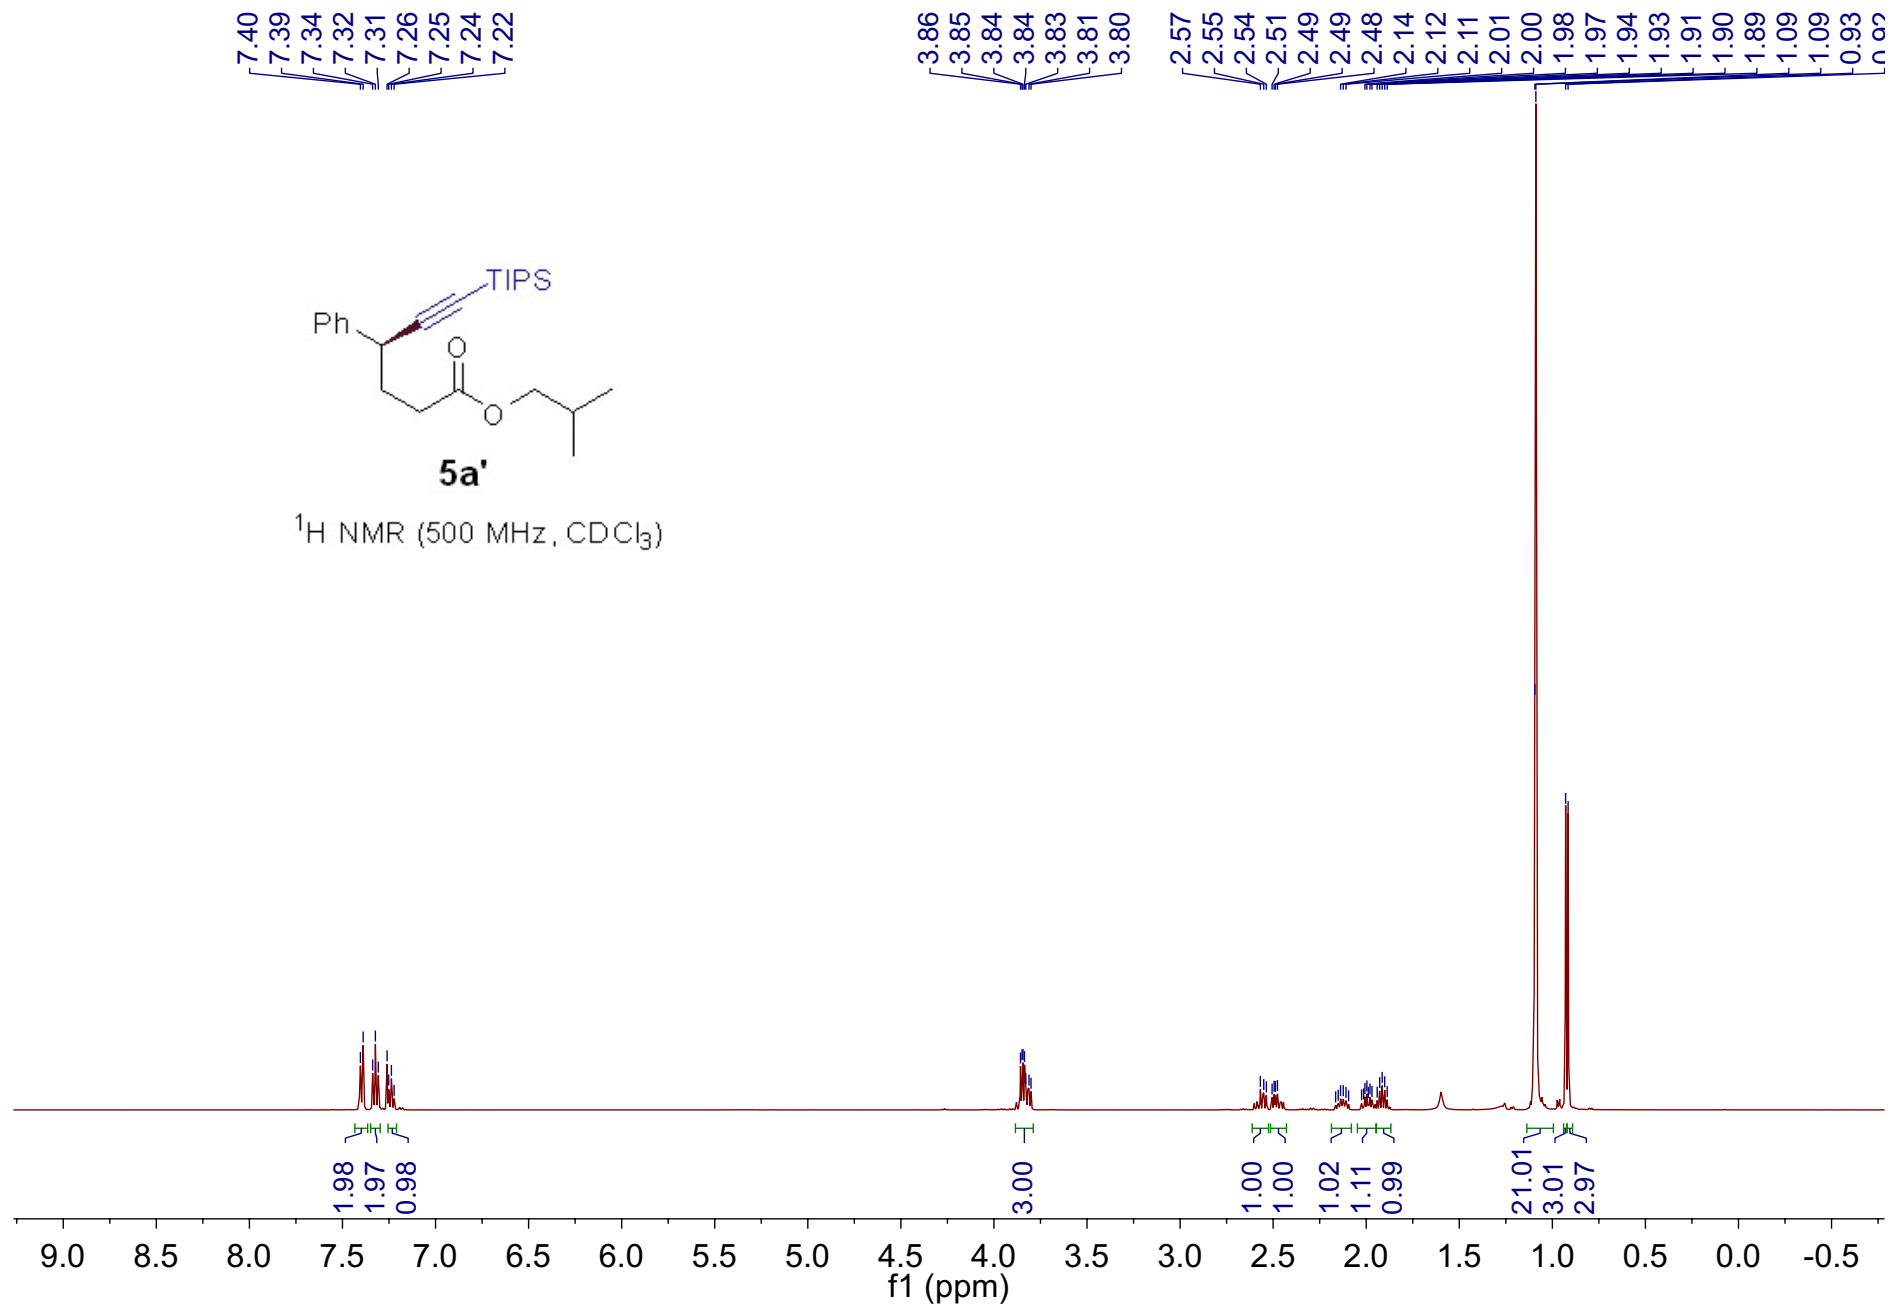

Supplementary Fig. 160.  $^1\text{H}$  NMR (500 MHz,  $\text{CDCl}_3$ ) spectra for compound **5a'**

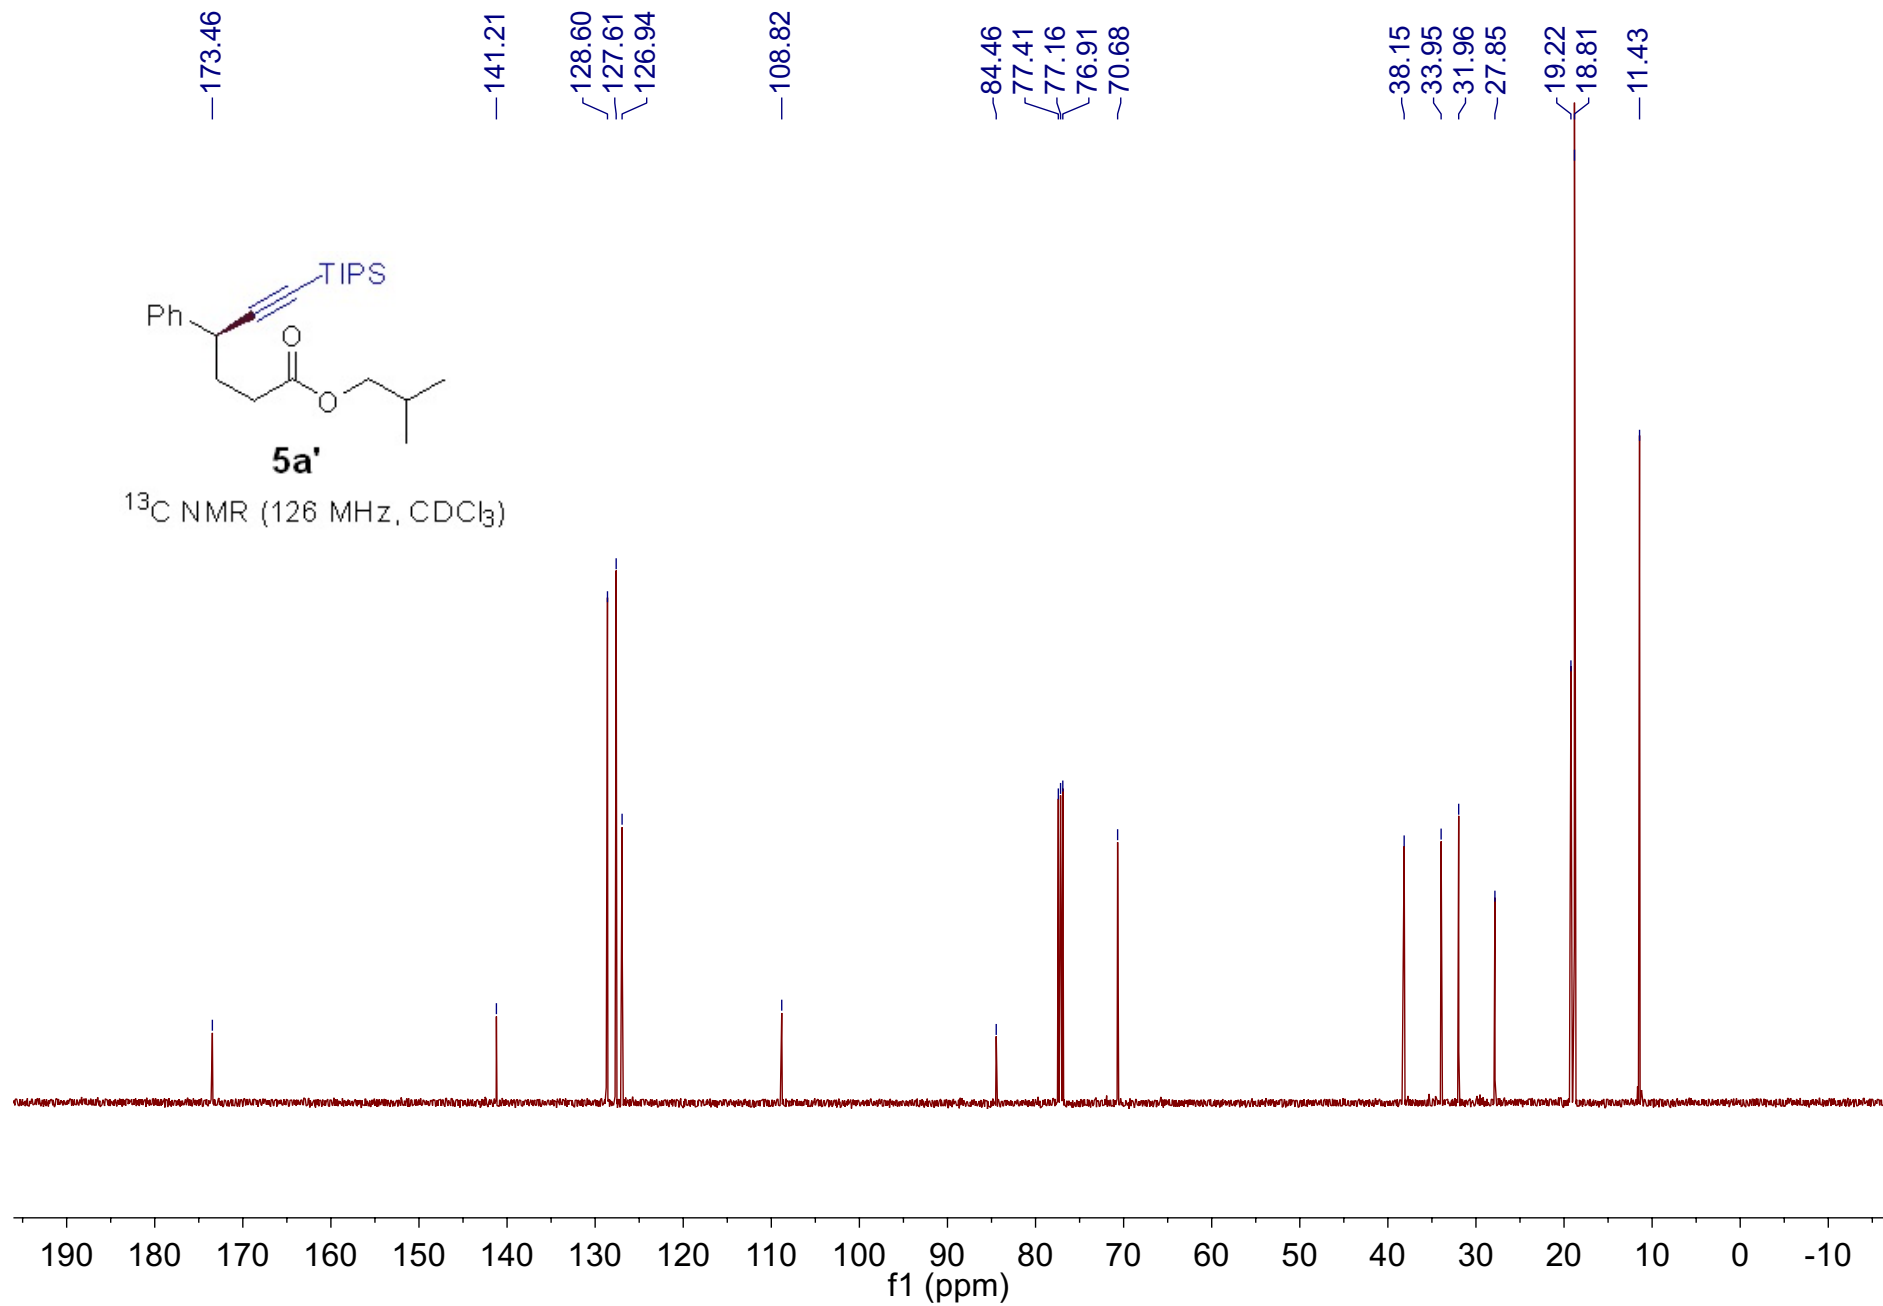

**Supplementary Fig. 161.** <sup>13</sup>C NMR (126 MHz, CDCl<sub>3</sub>) spectra for compound **5a'**

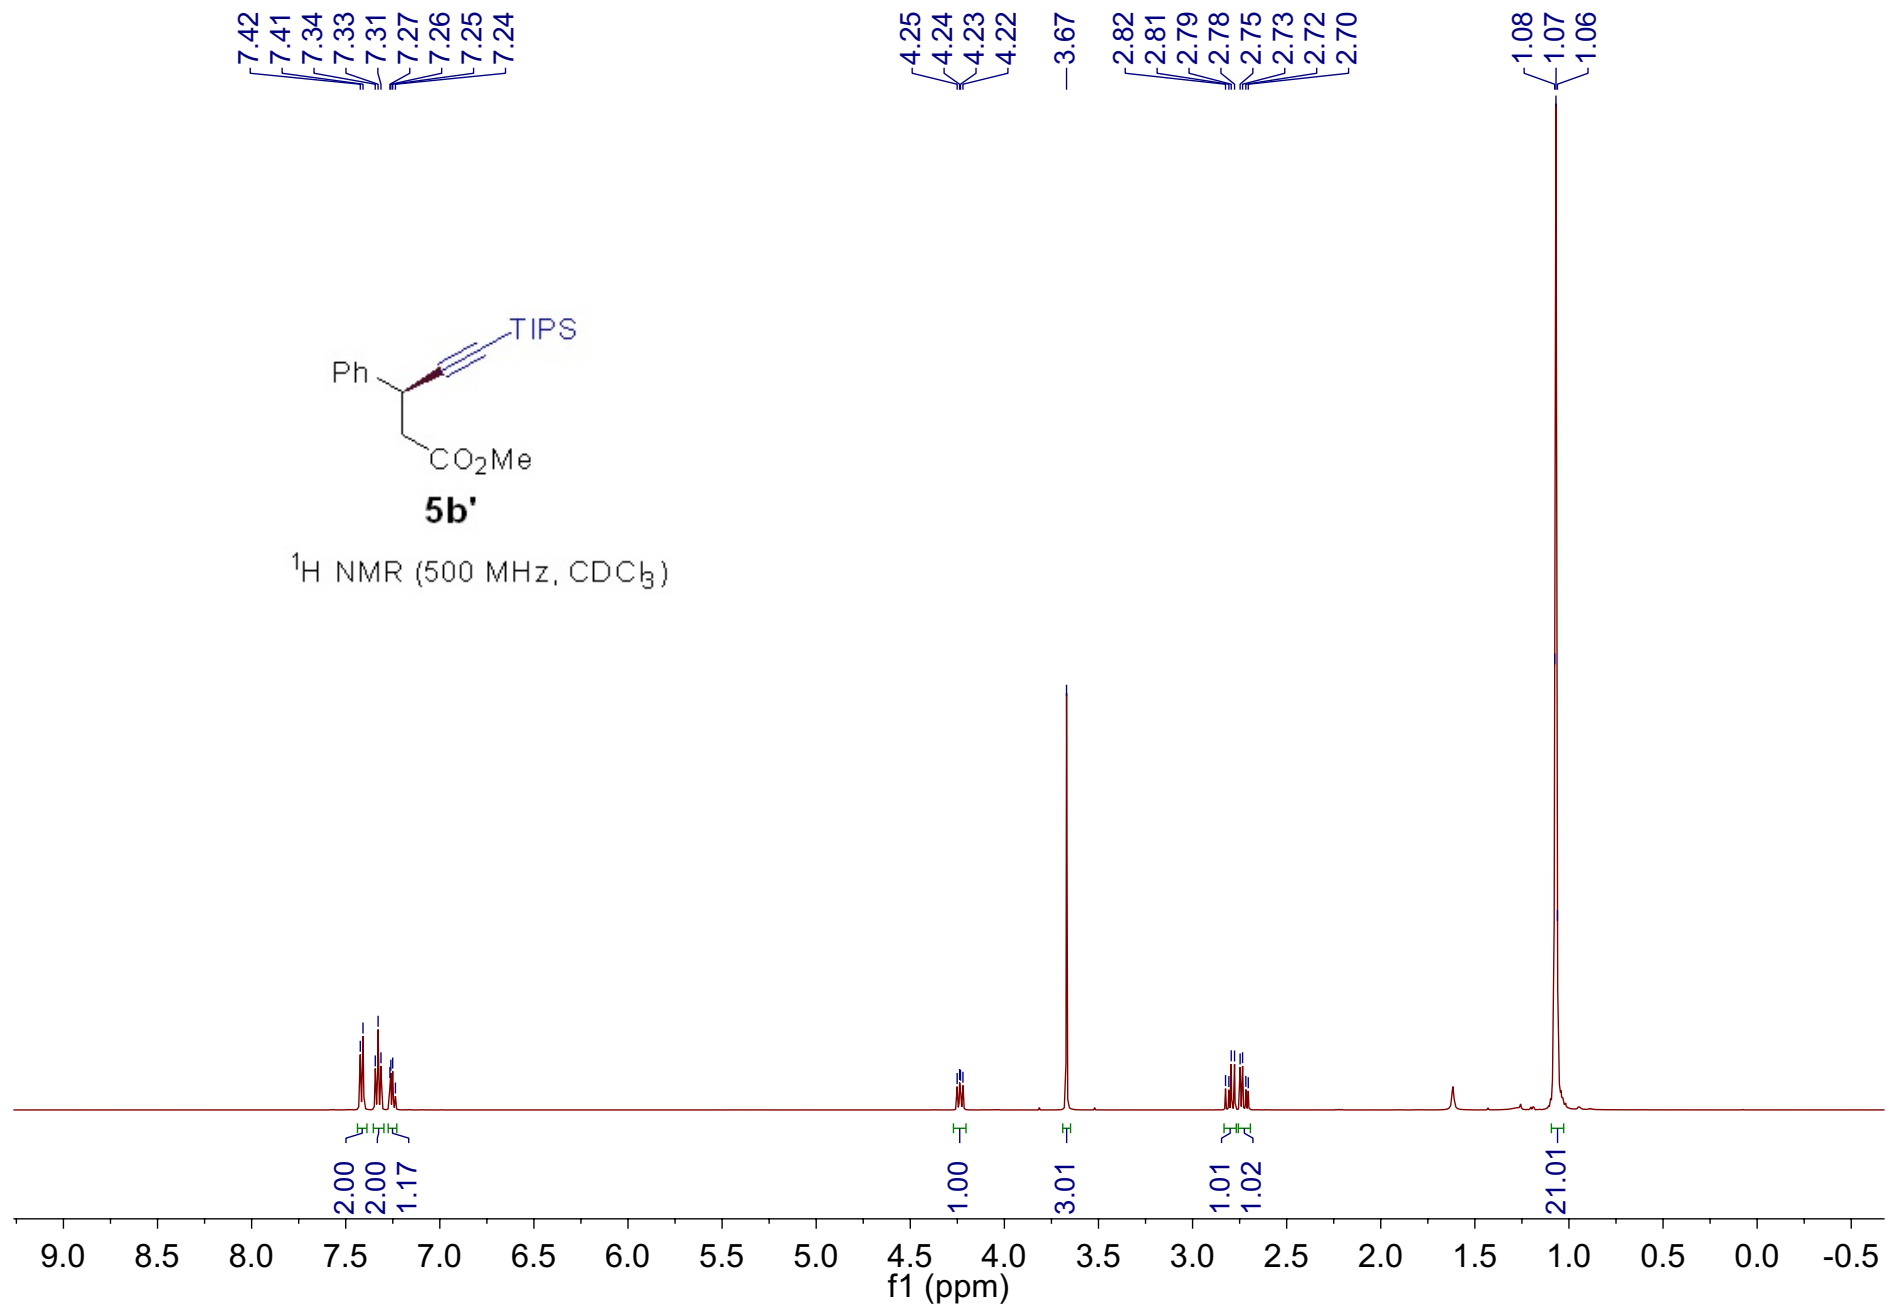

Supplementary Fig. 162. <sup>1</sup>H NMR (500 MHz, CDCl<sub>3</sub>) spectra for compound **5b'**

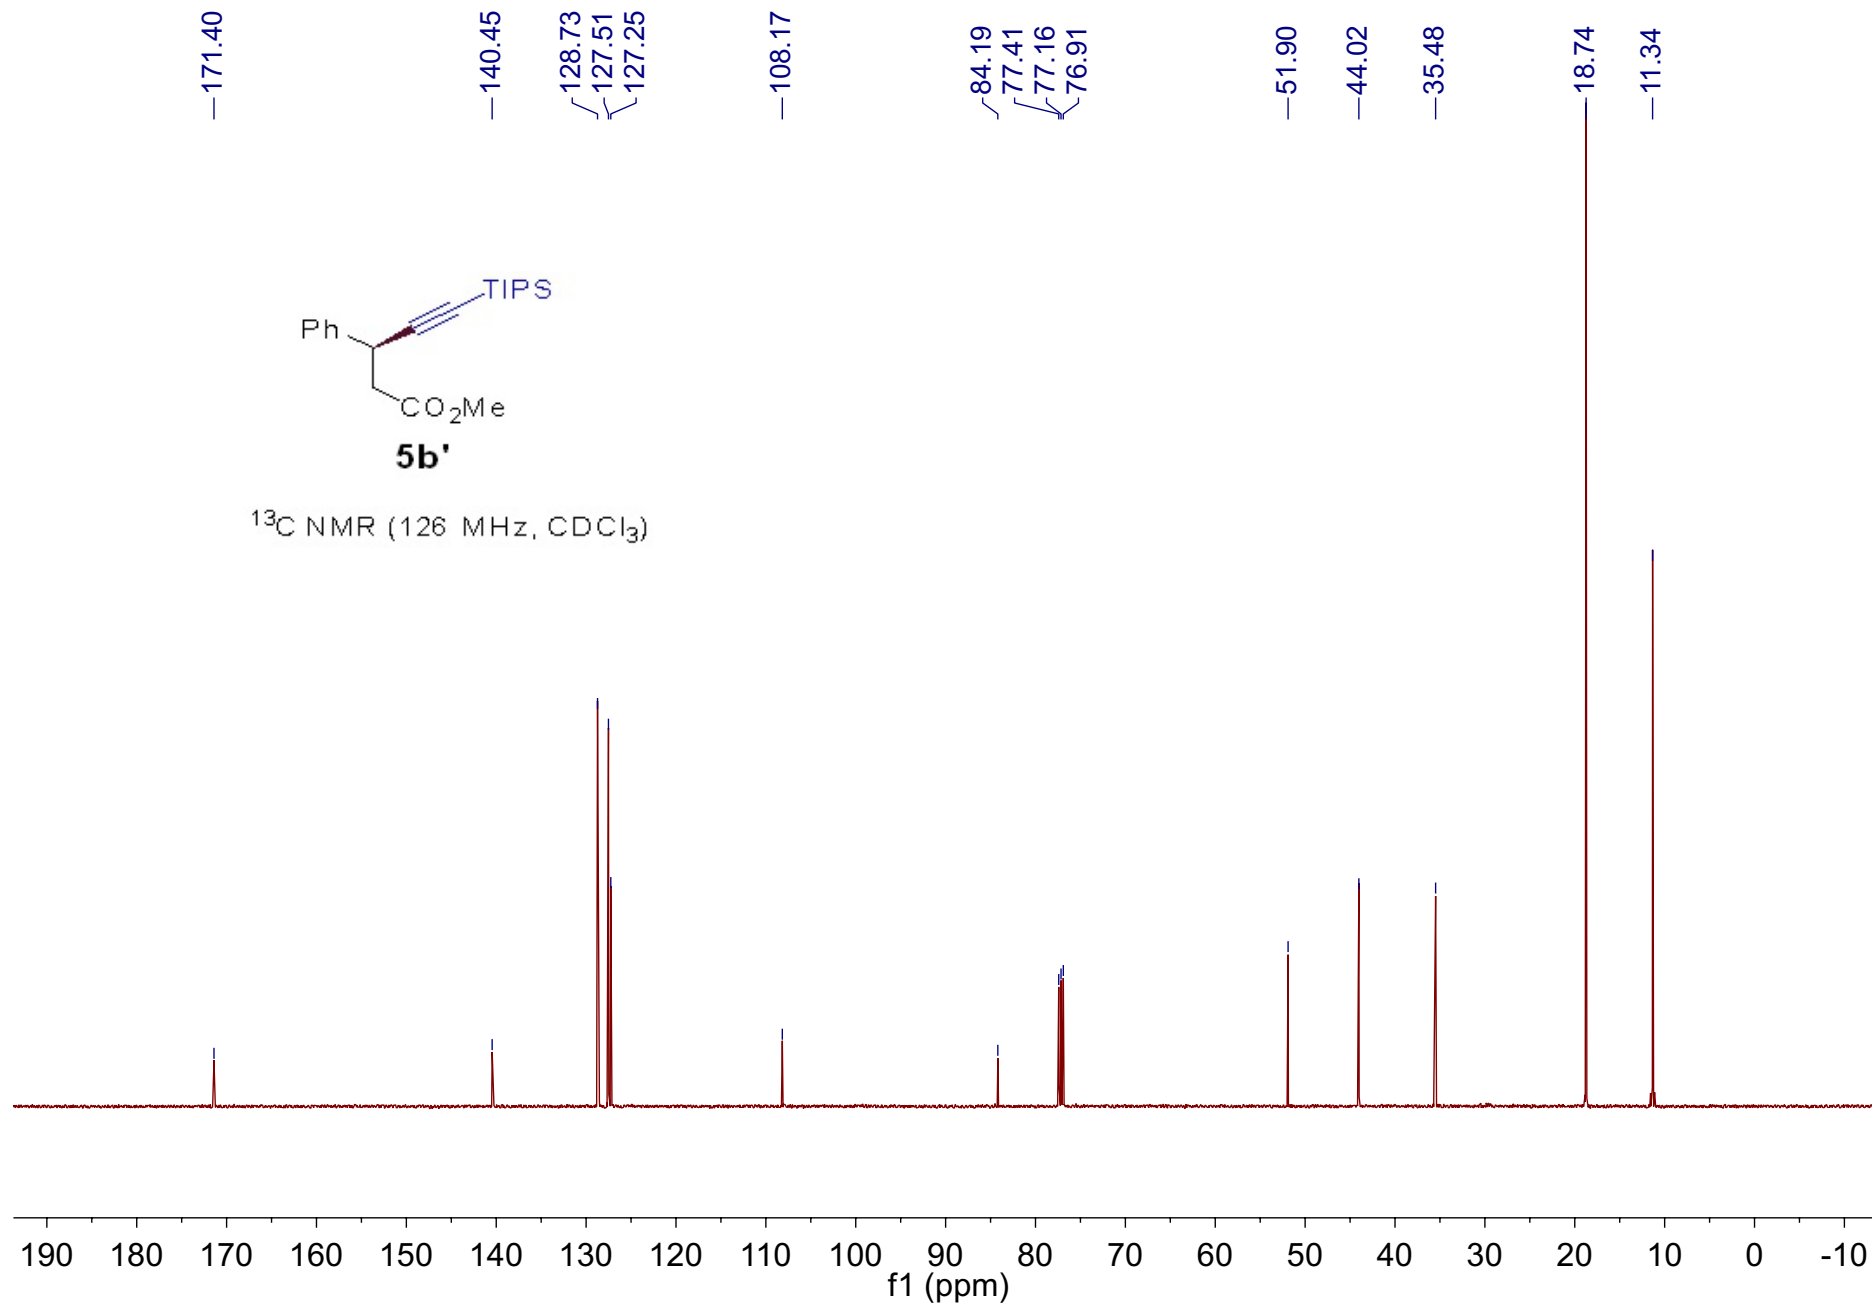

Supplementary Fig. 163. <sup>13</sup>C NMR (126 MHz, CDCl<sub>3</sub>) spectra for compound **5b'**

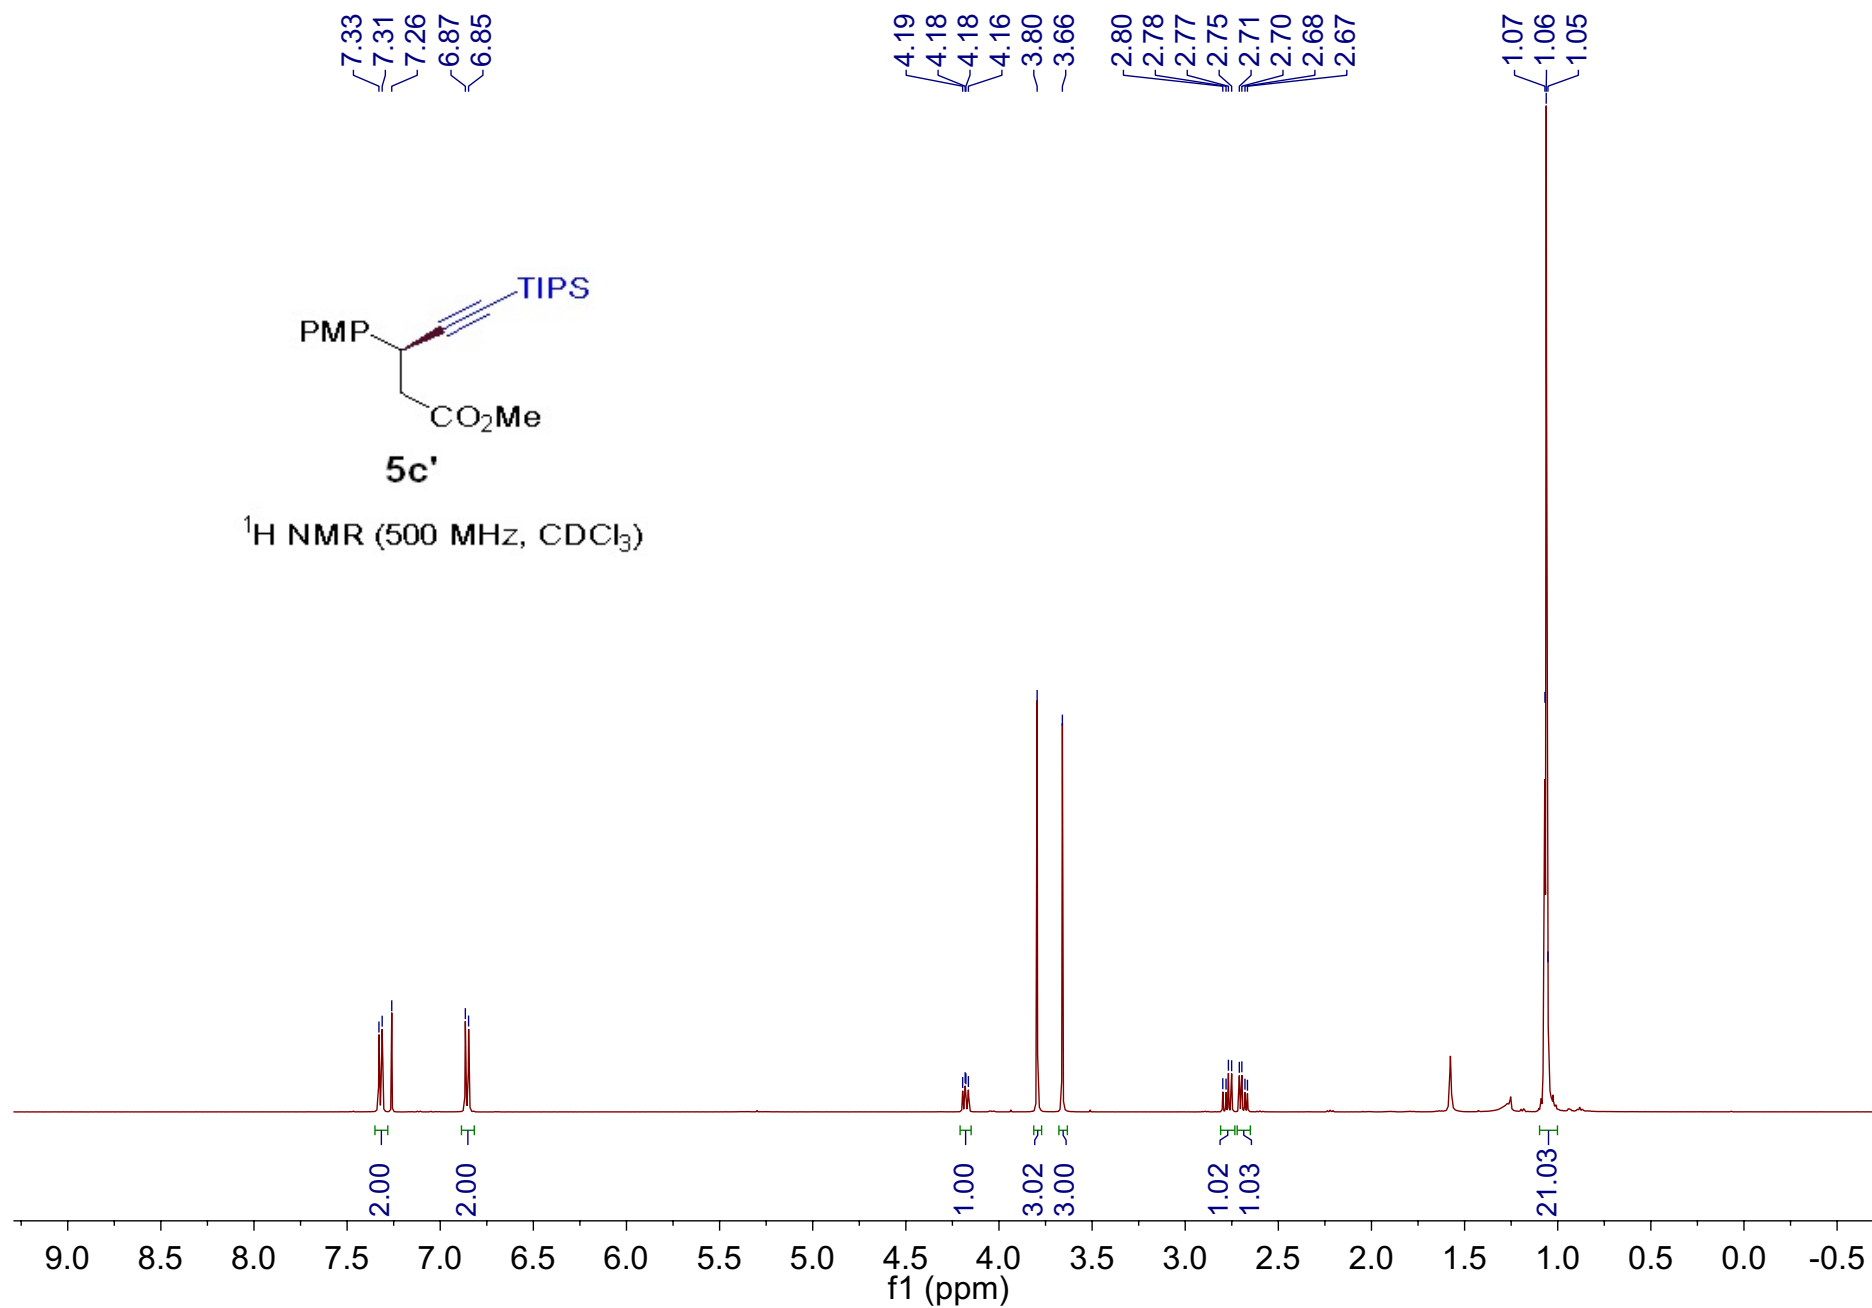

Supplementary Fig. 164.  $^1\text{H}$  NMR (500 MHz,  $\text{CDCl}_3$ ) spectra for compound **5c'**



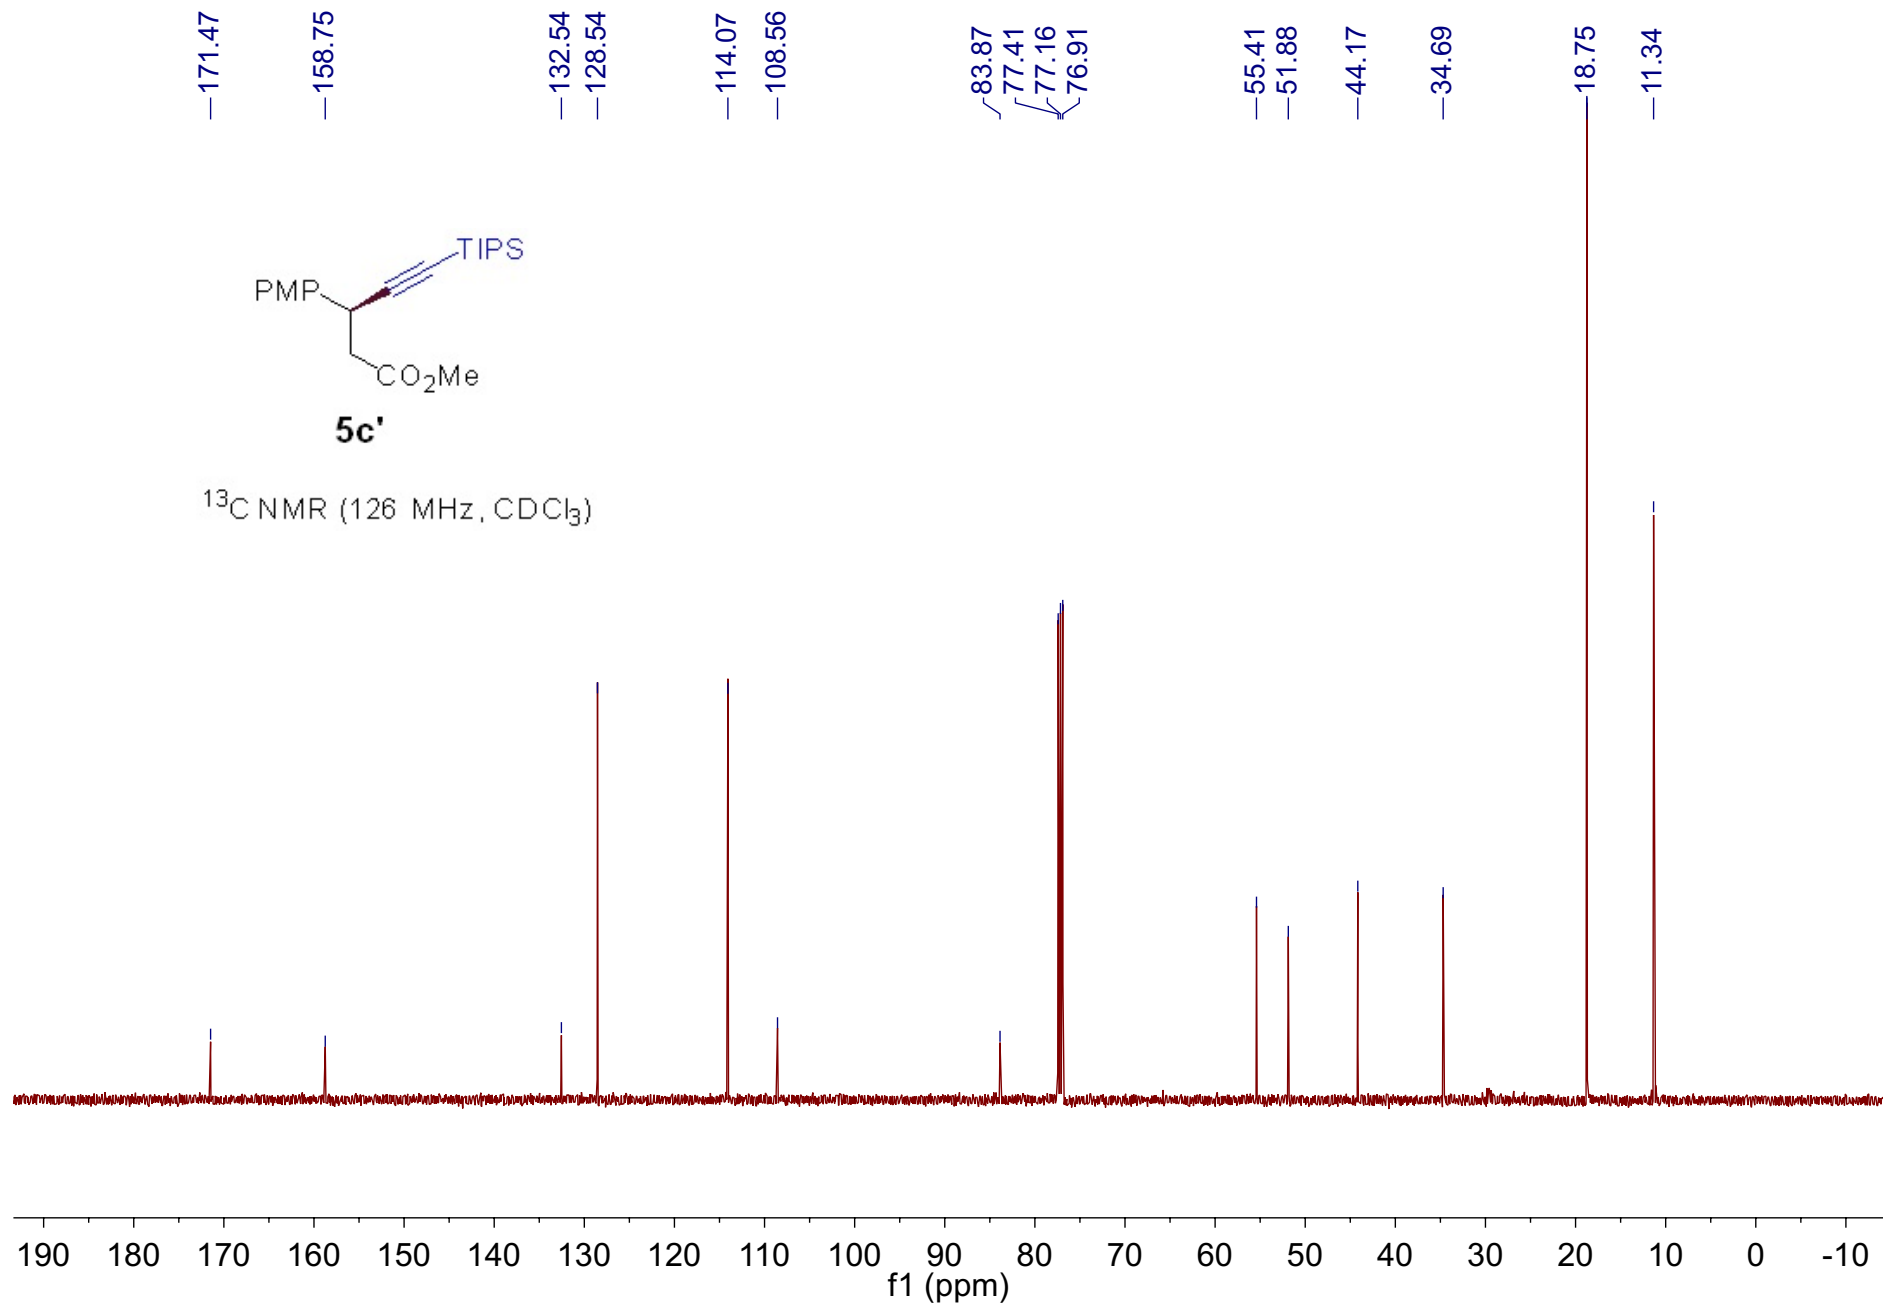

Supplementary Fig. 165. <sup>13</sup>C NMR (126 MHz, CDCl<sub>3</sub>) spectra for compound **5c'**

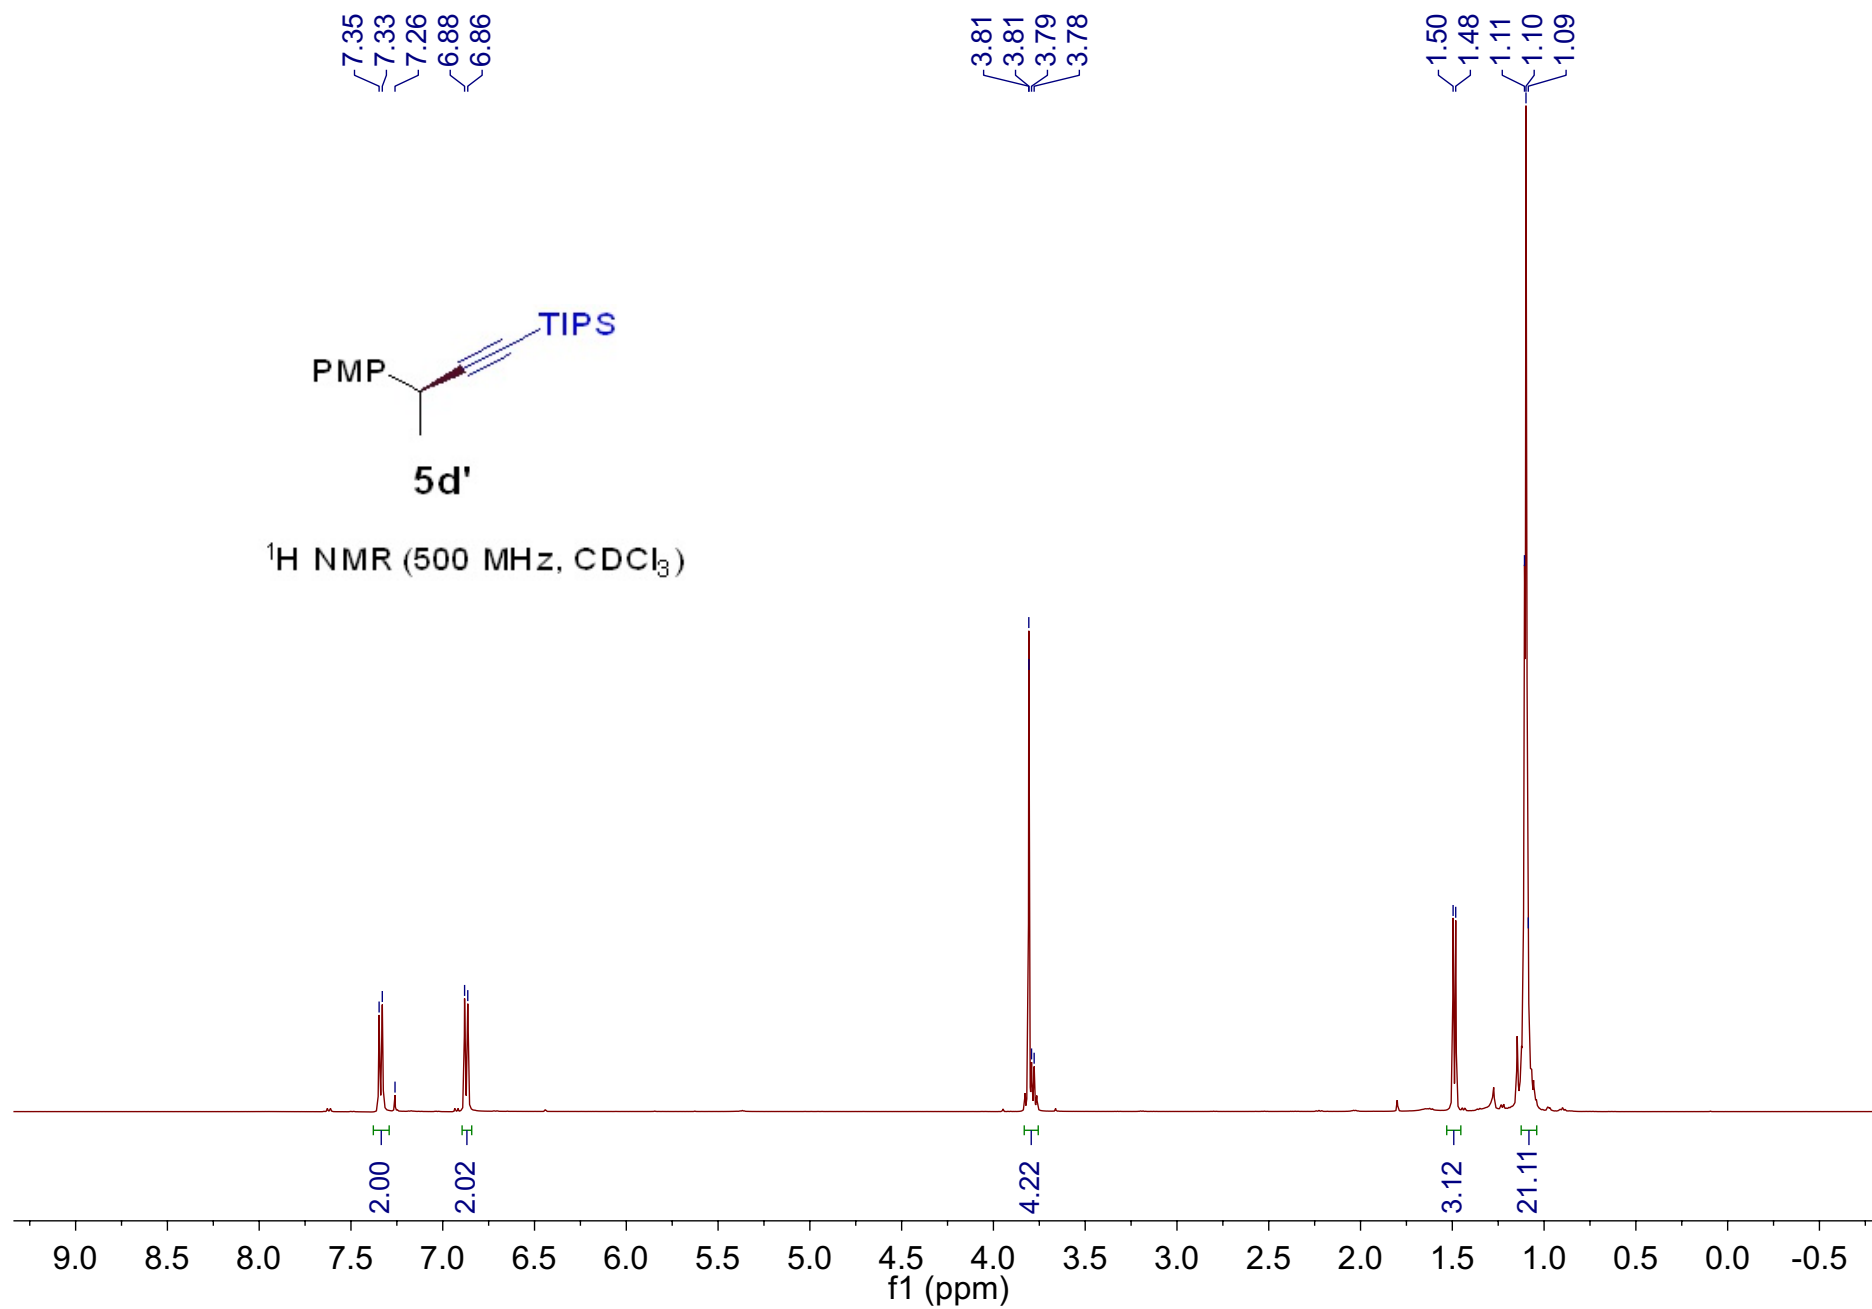

Supplementary Fig. 166.  $^1\text{H NMR}$  (500 MHz,  $\text{CDCl}_3$ ) spectra for compound **5d'**

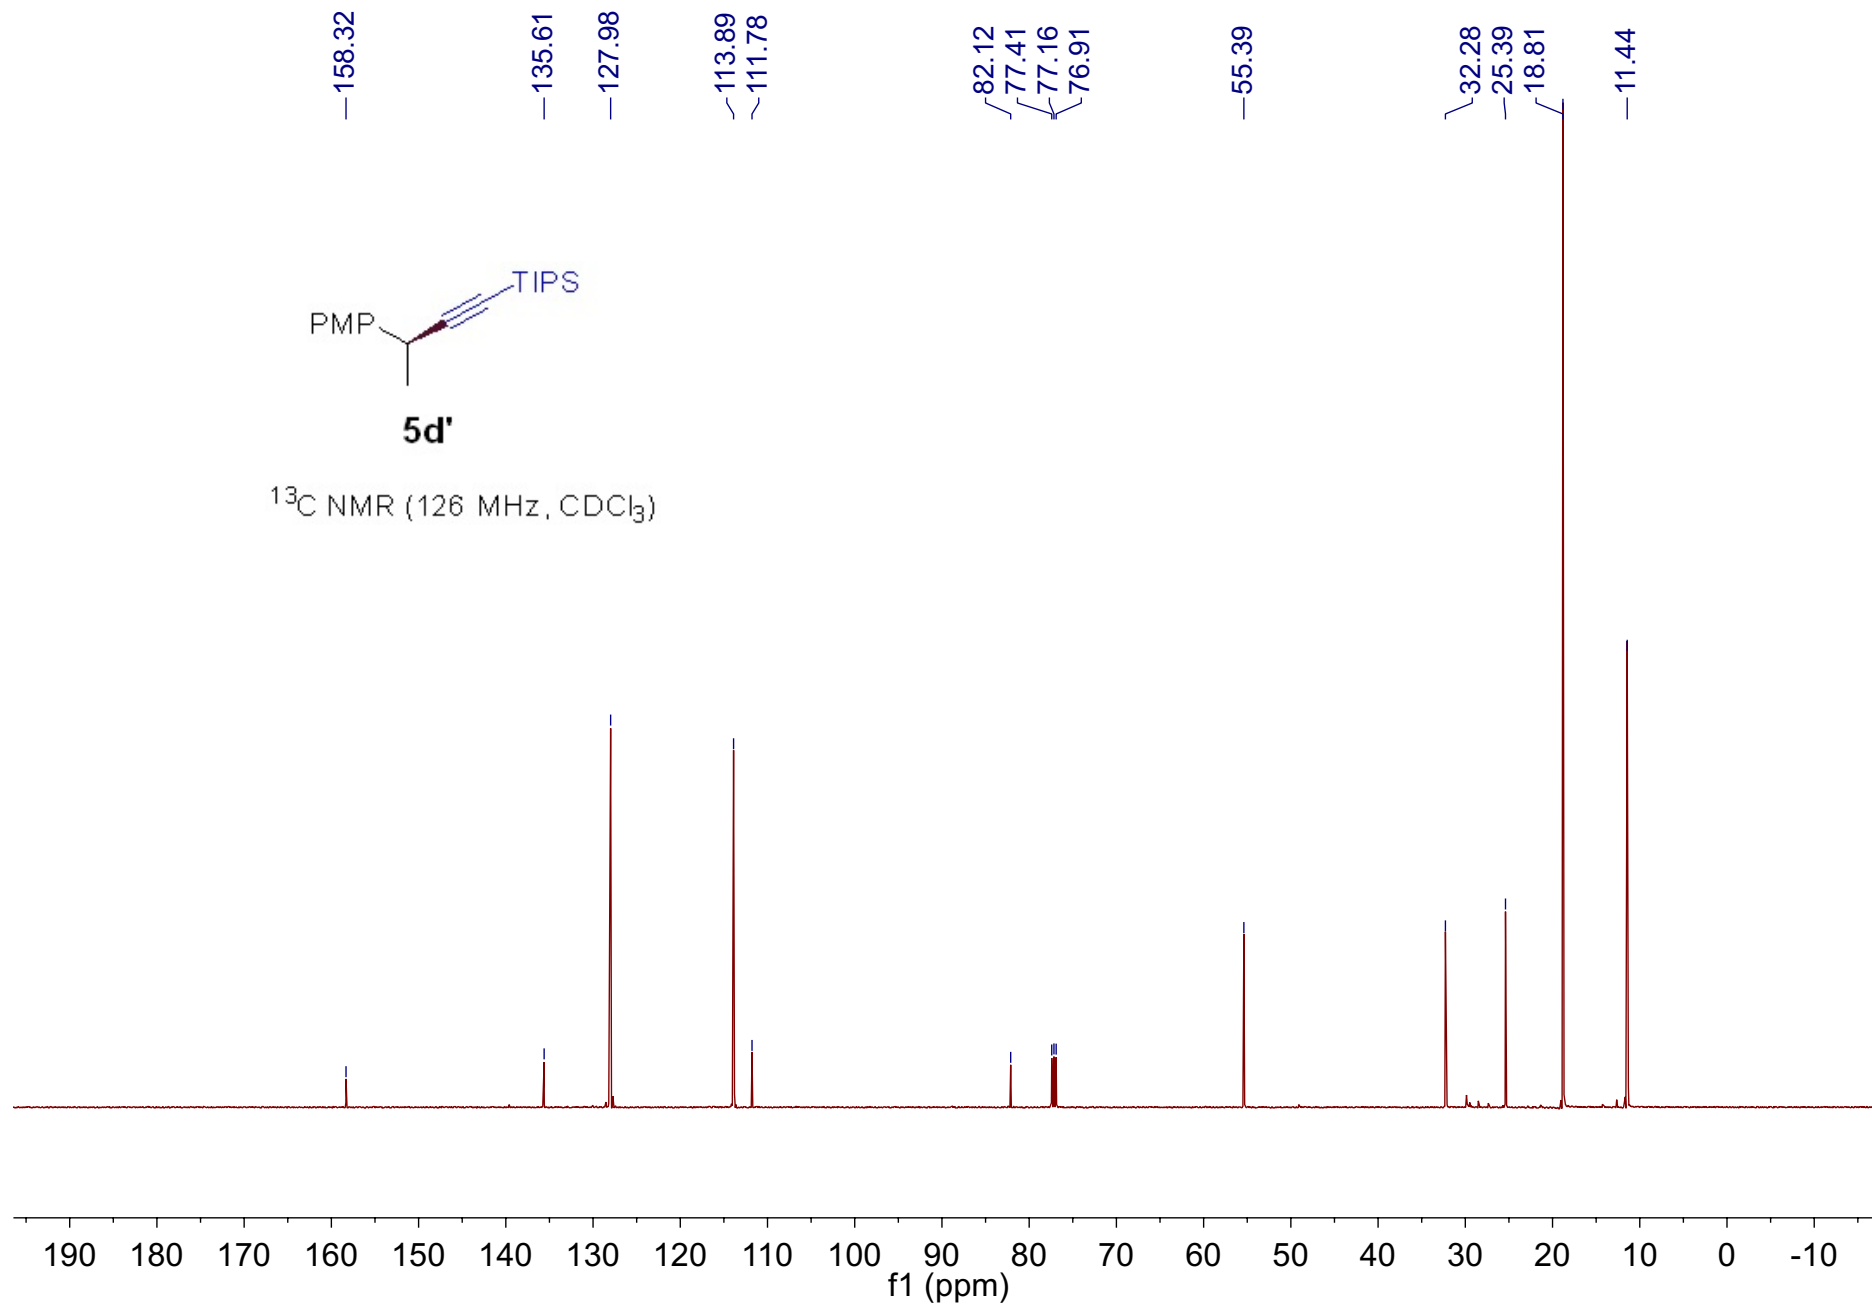

**Supplementary Fig. 167.**  $^{13}\text{C}$  NMR (126 MHz,  $\text{CDCl}_3$ ) spectra for compound **5d'**

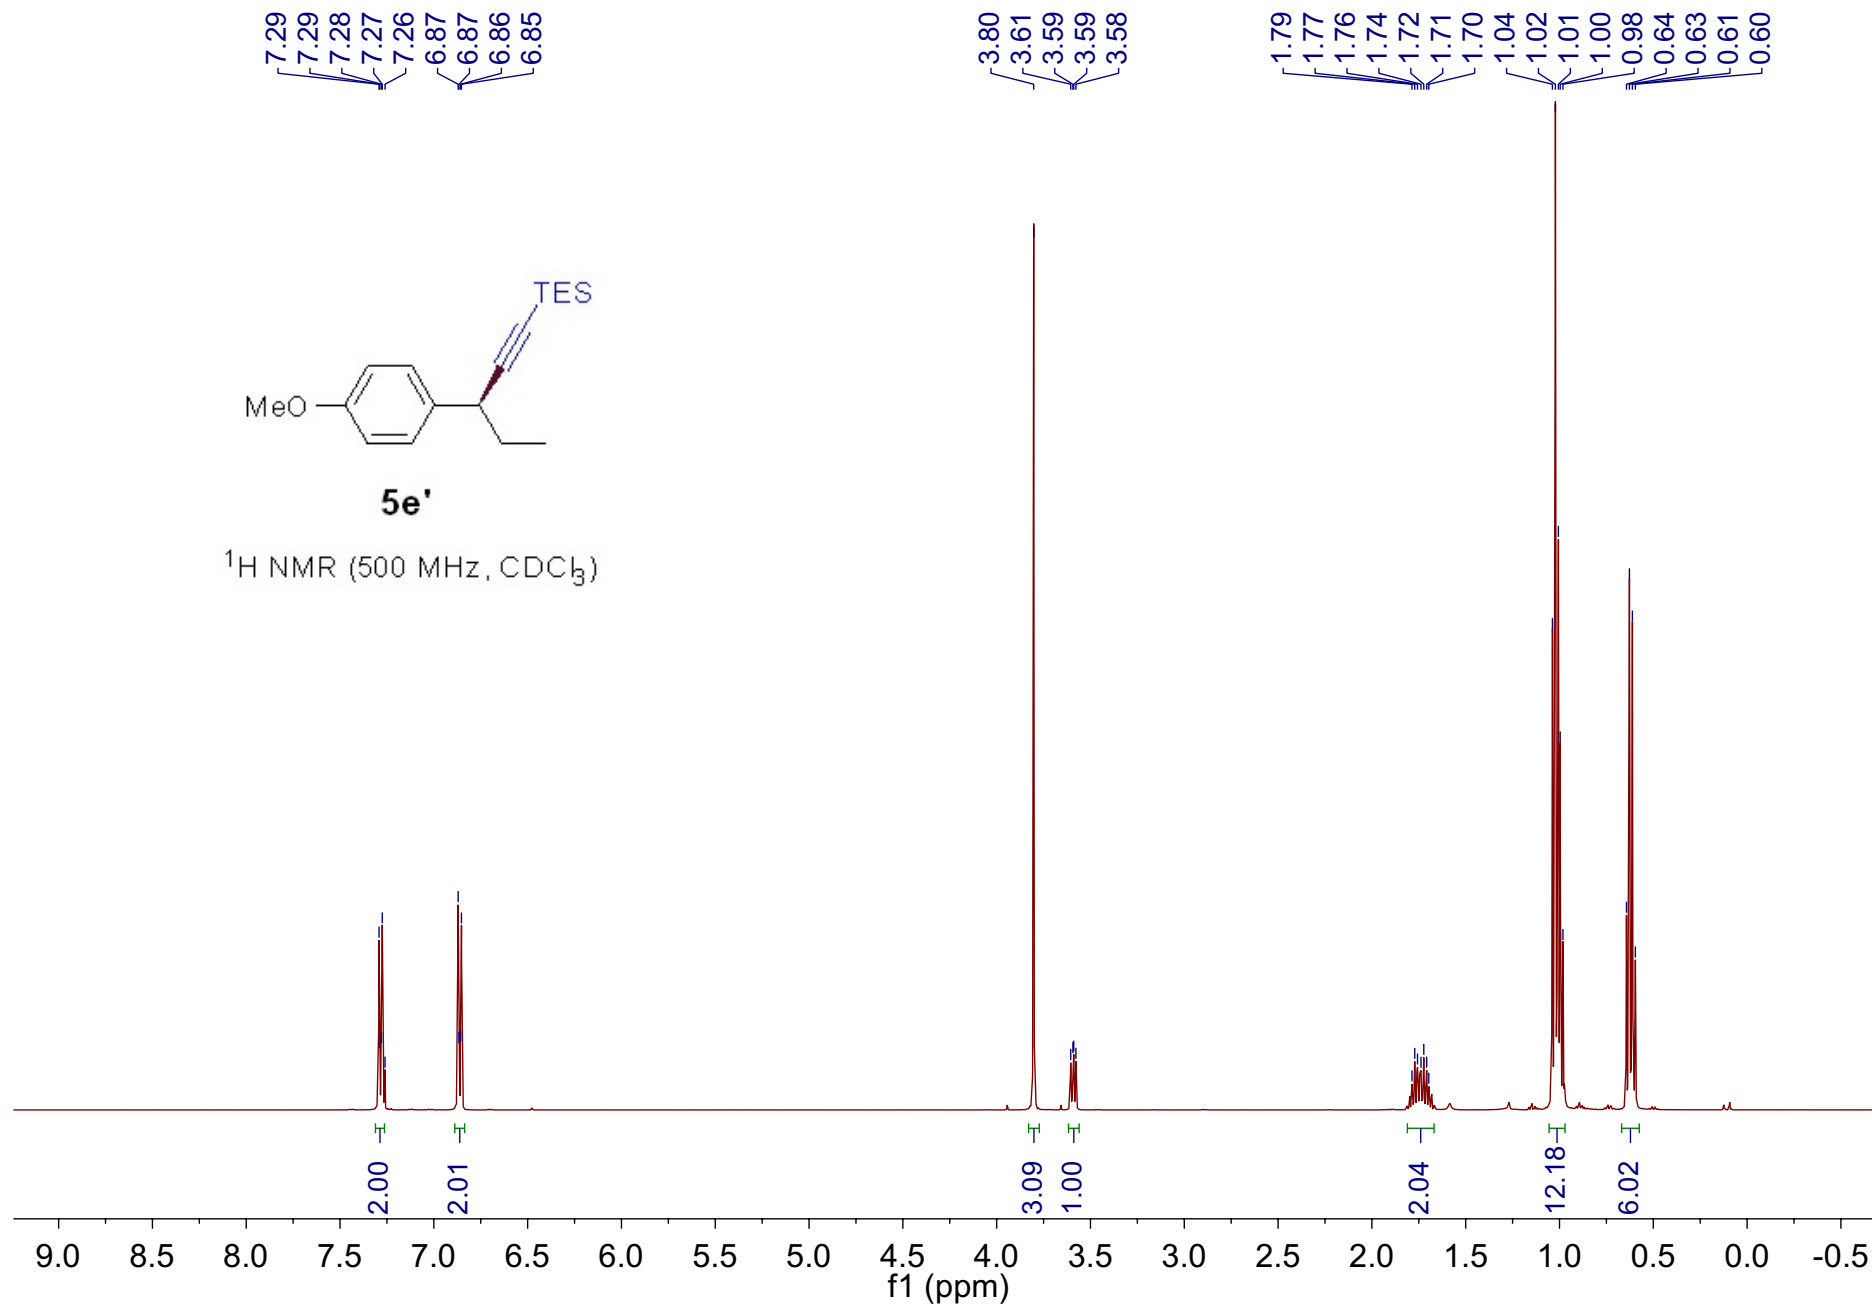

Supplementary Fig. 168. <sup>1</sup>H NMR (500 MHz, CDCl<sub>3</sub>) spectra for compound **5e'**

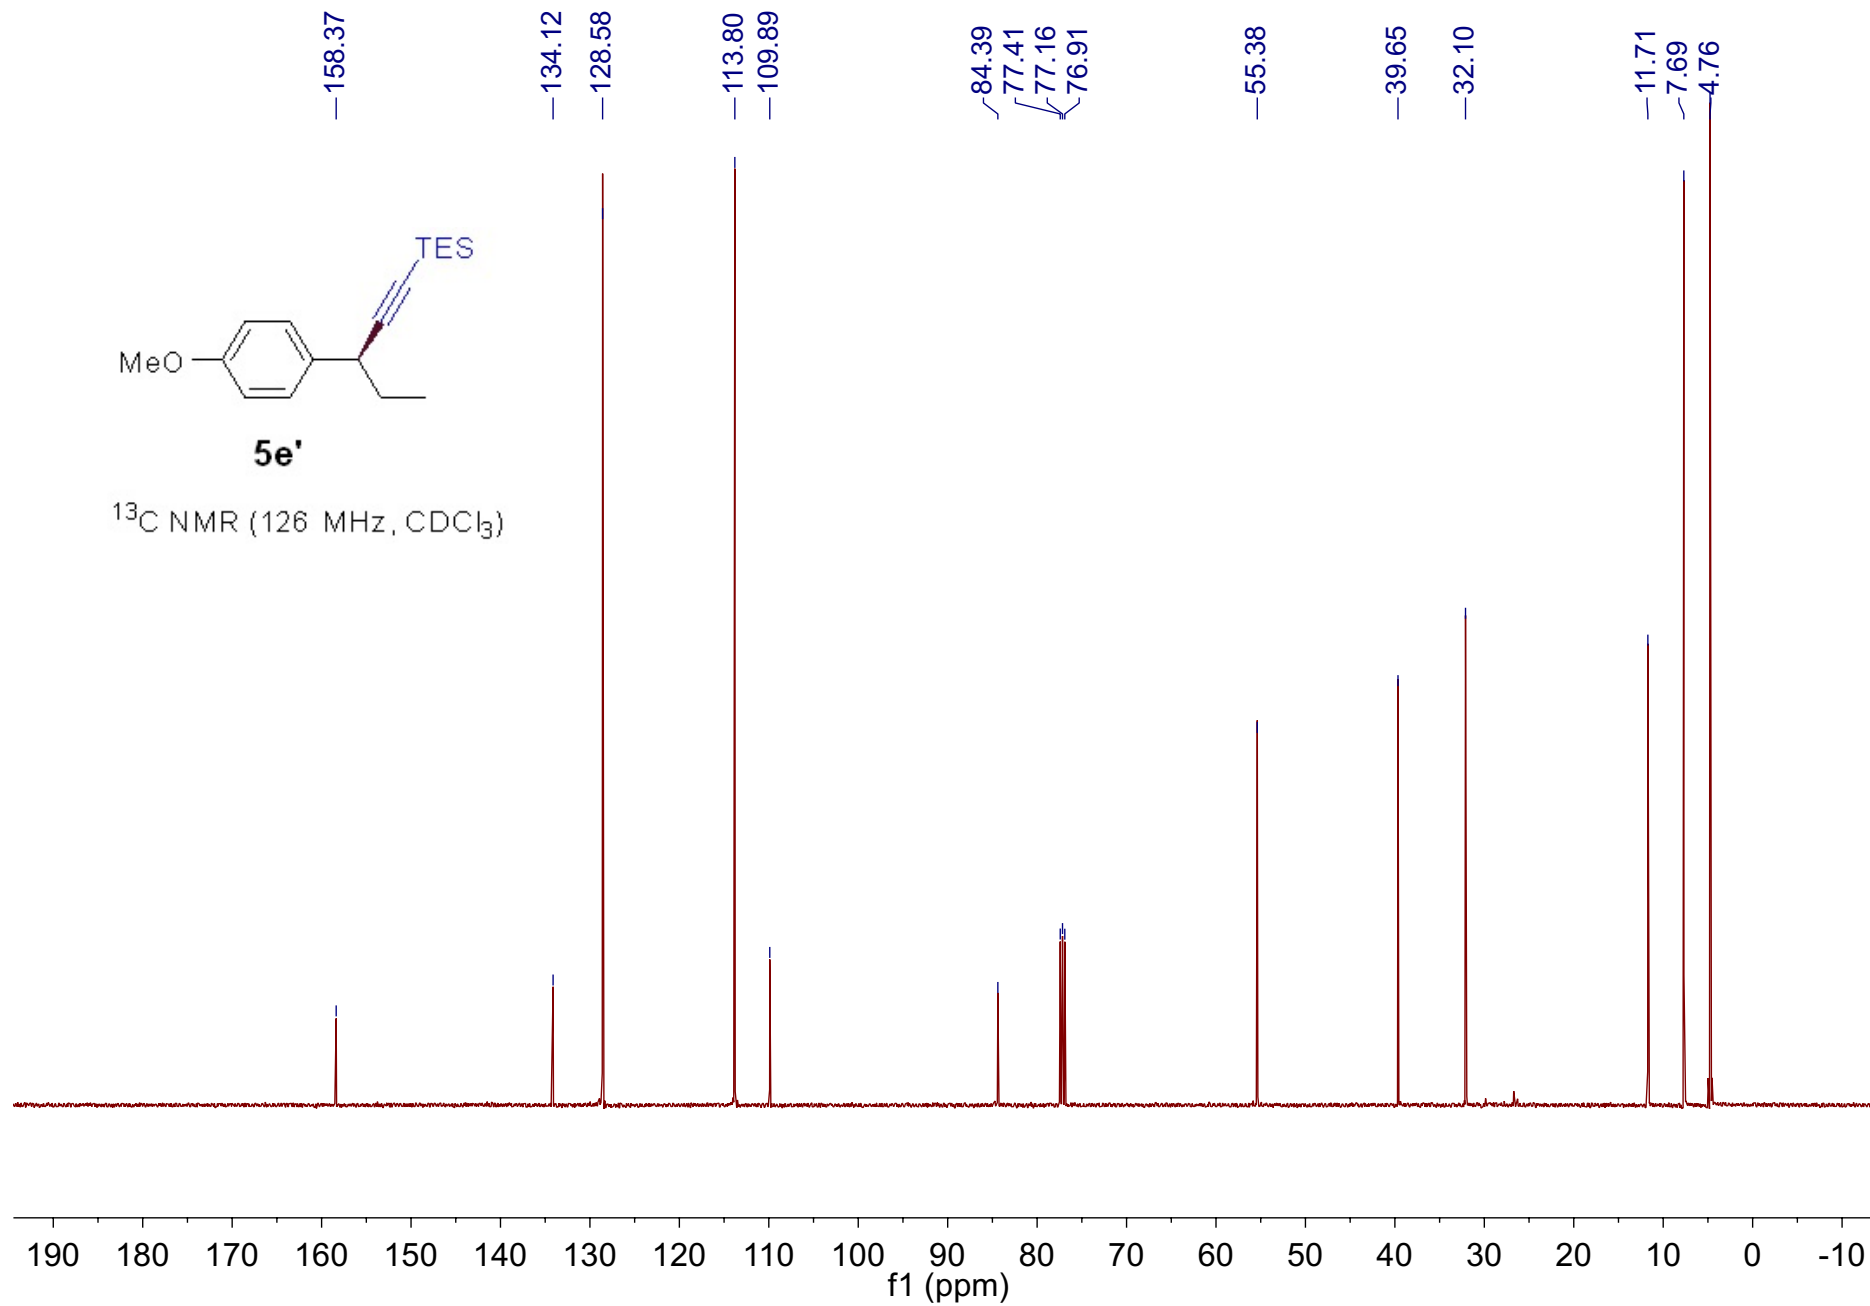

Supplementary Fig. 169.  $^{13}\text{C}$  NMR (126 MHz,  $\text{CDCl}_3$ ) spectra for compound **5e'**

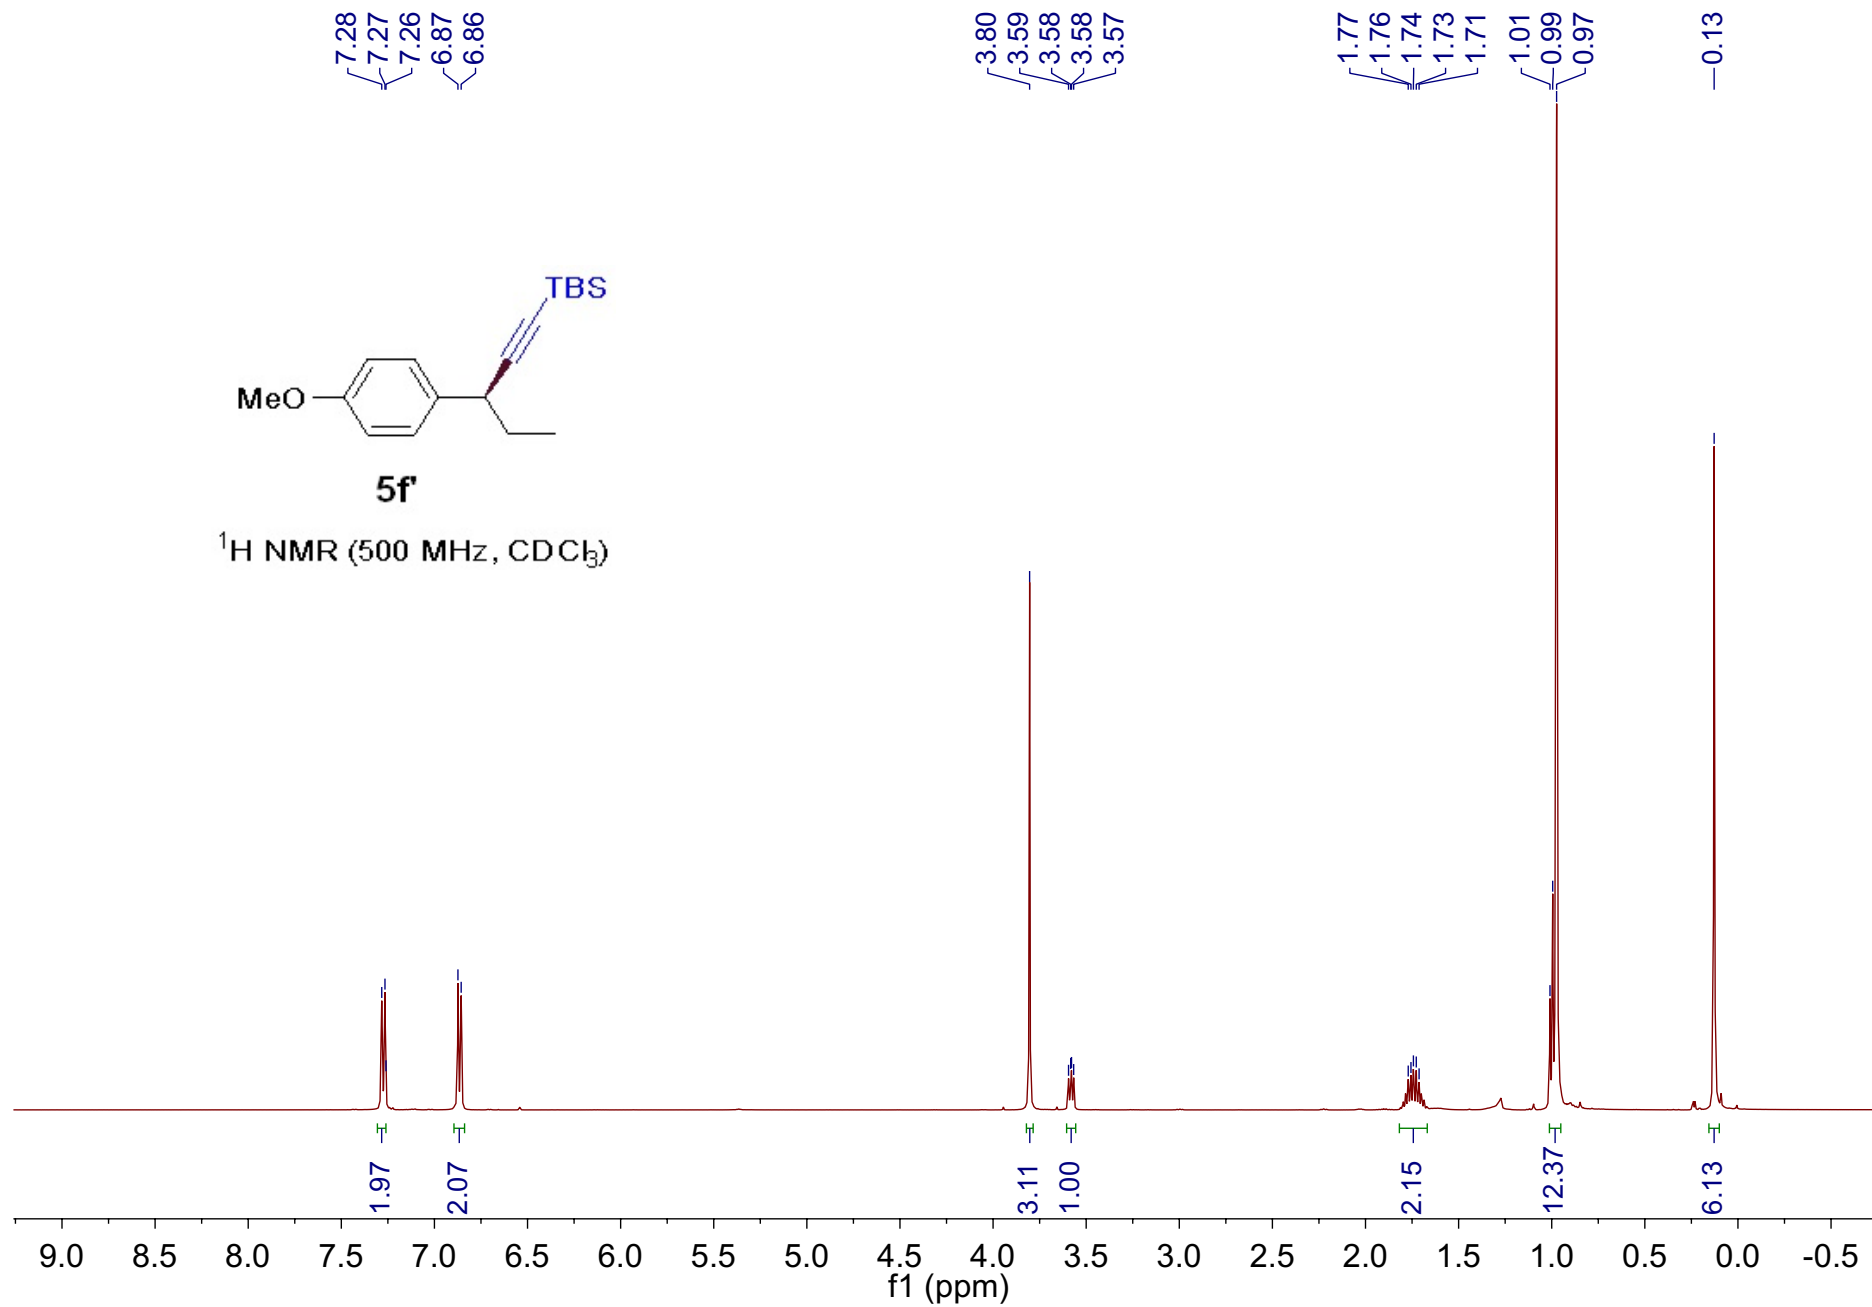

Supplementary Fig. 170.  $^1\text{H}$  NMR (500 MHz,  $\text{CDCl}_3$ ) spectra for compound **5f**

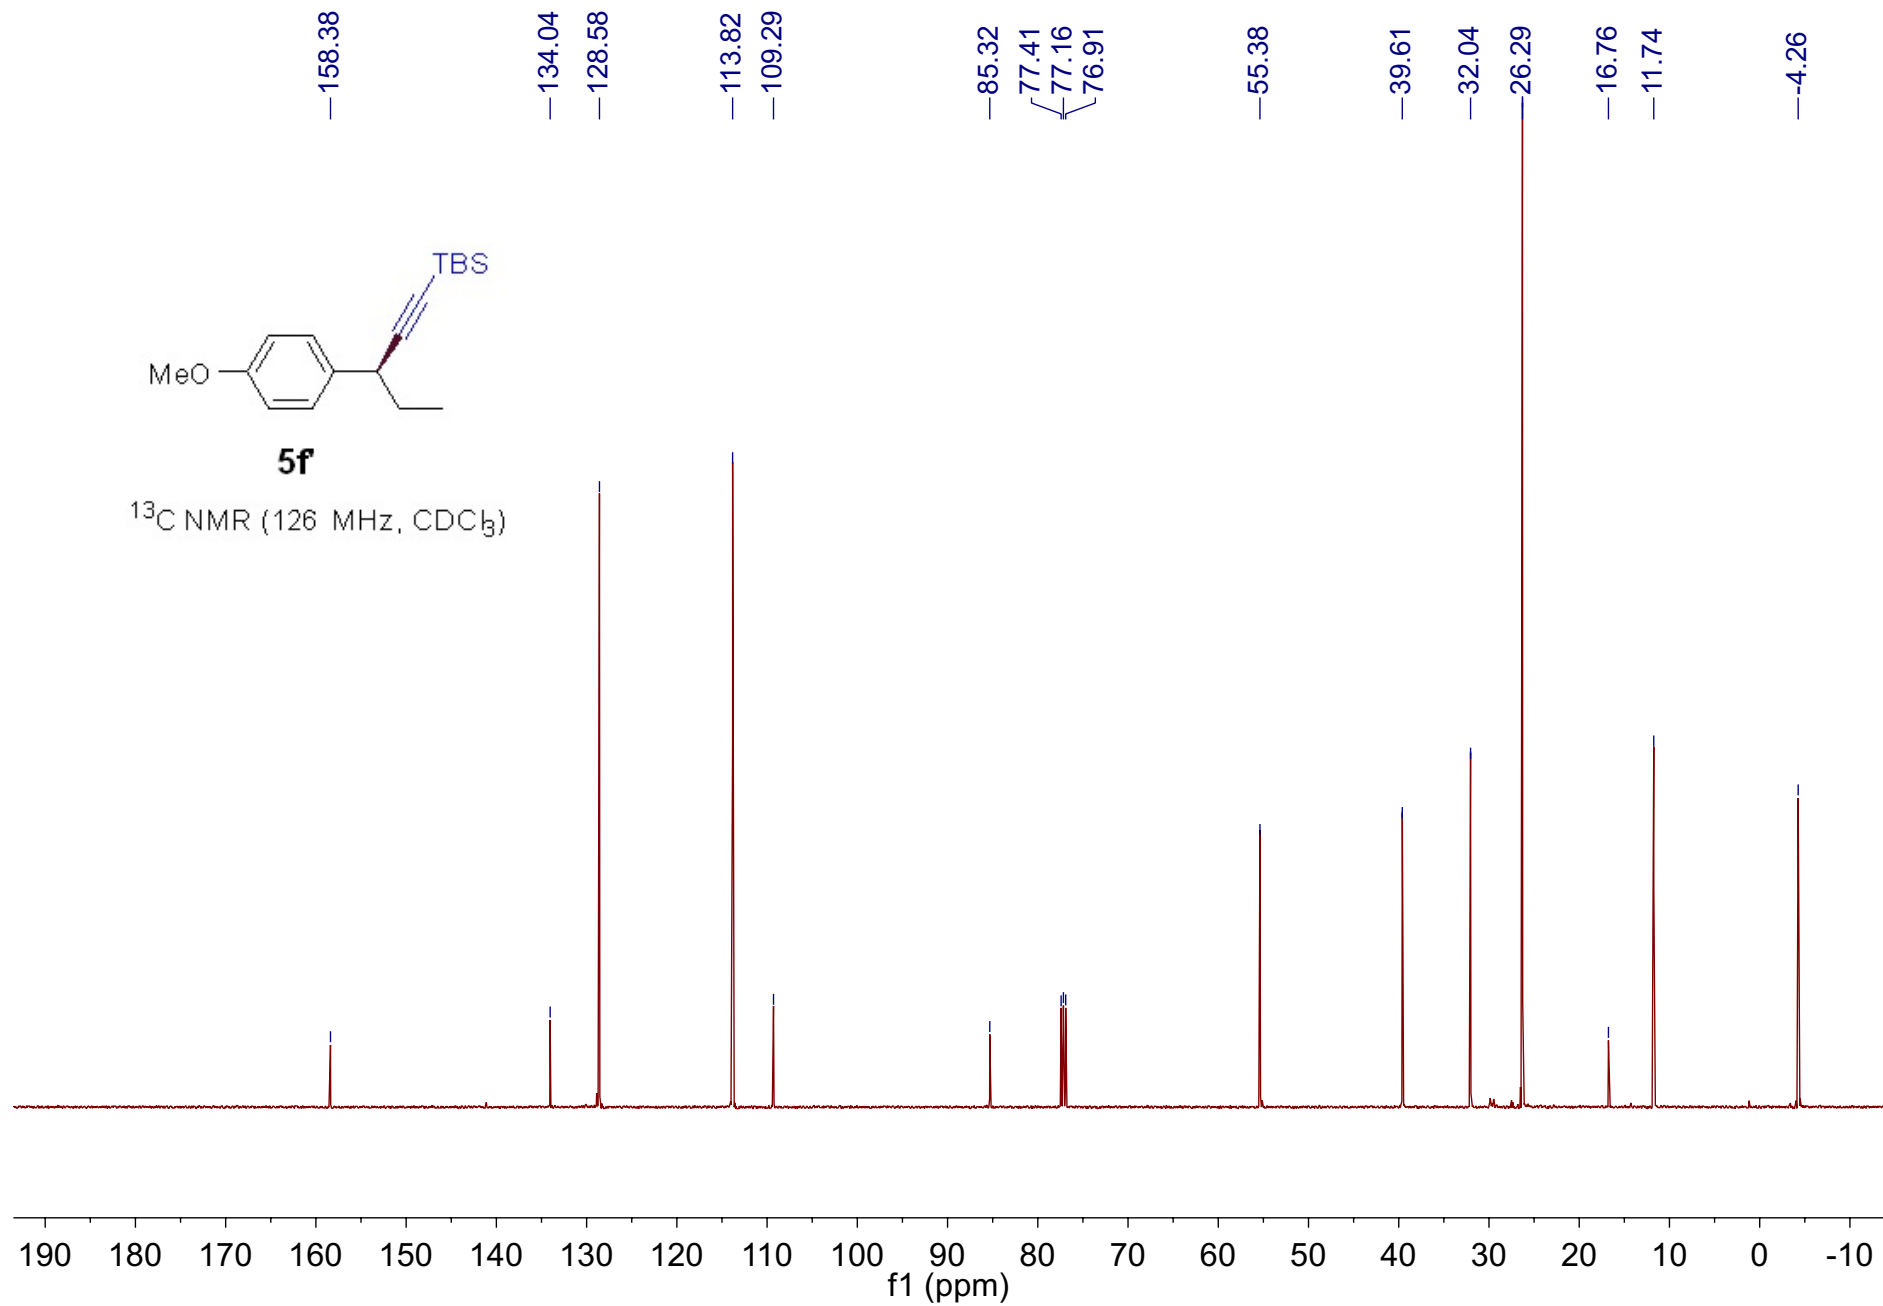

**Supplementary Fig. 171.** <sup>13</sup>C NMR (126 MHz, CDCl<sub>3</sub>) spectra for compound **5f**

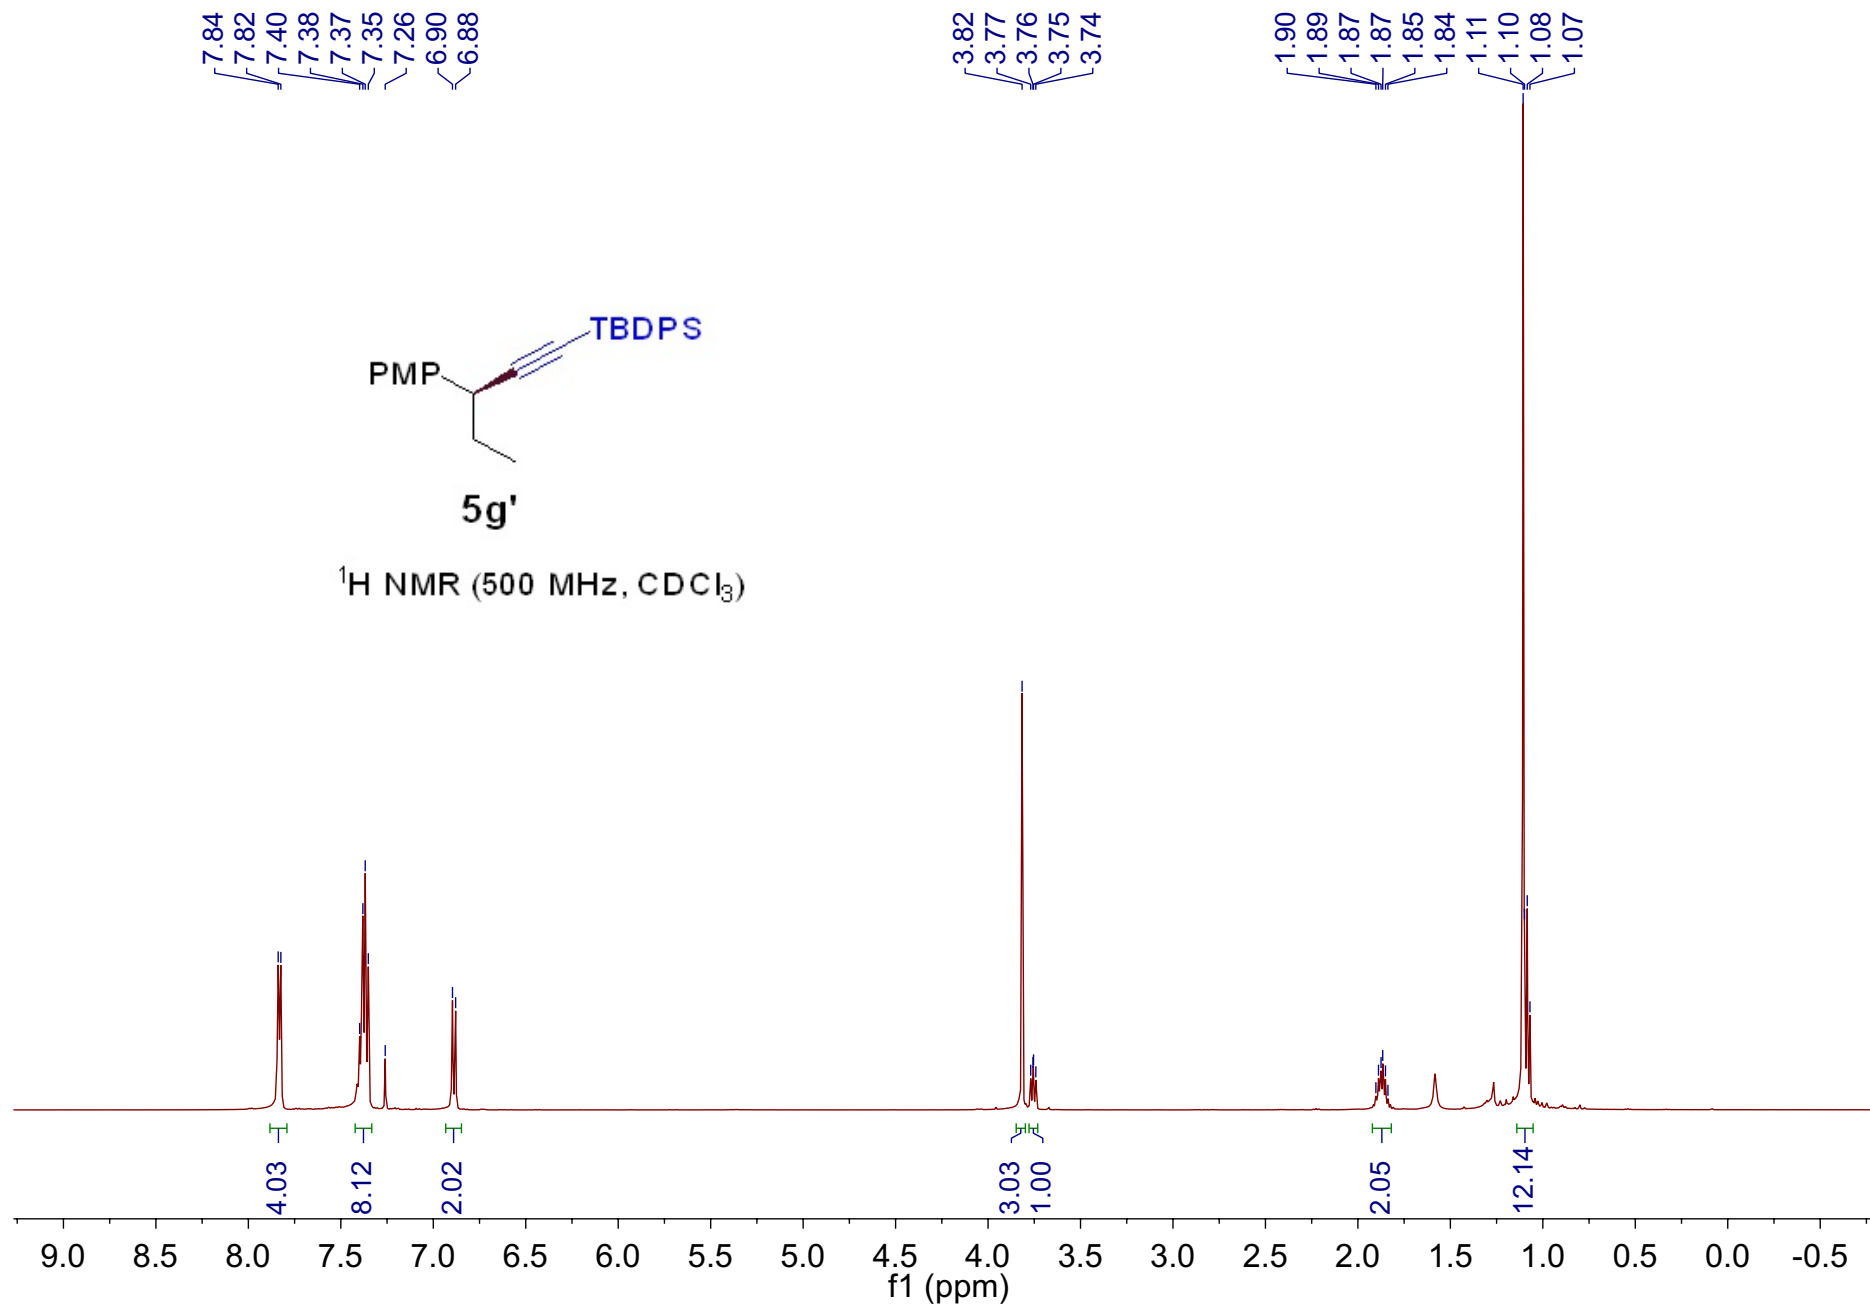

Supplementary Fig. 172.  $^1\text{H}$  NMR (500 MHz,  $\text{CDCl}_3$ ) spectra for compound **5g'**



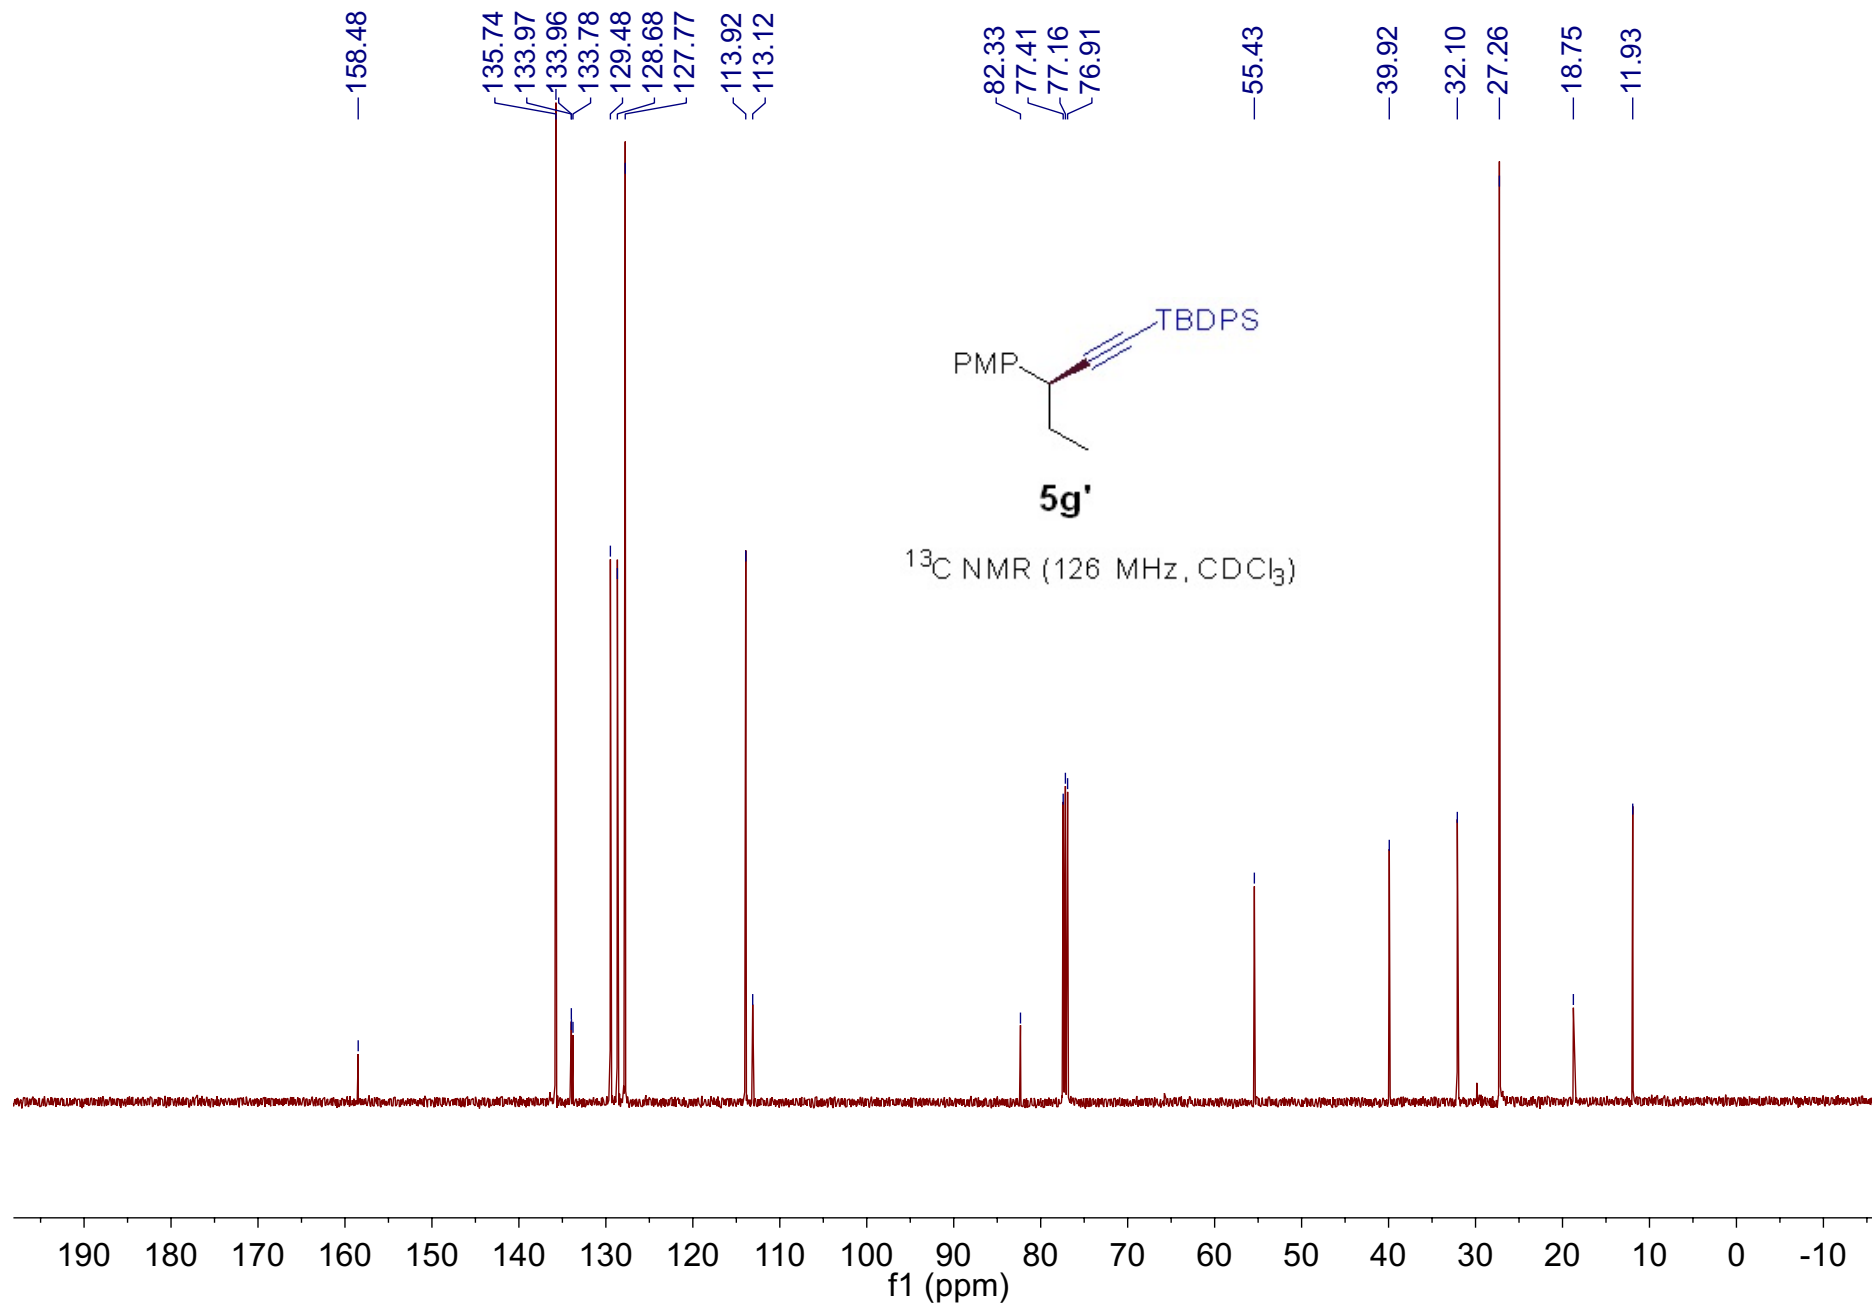

Supplementary Fig. 173.  $^{13}\text{C}$  NMR (126 MHz,  $\text{CDCl}_3$ ) spectra for compound **5g'**

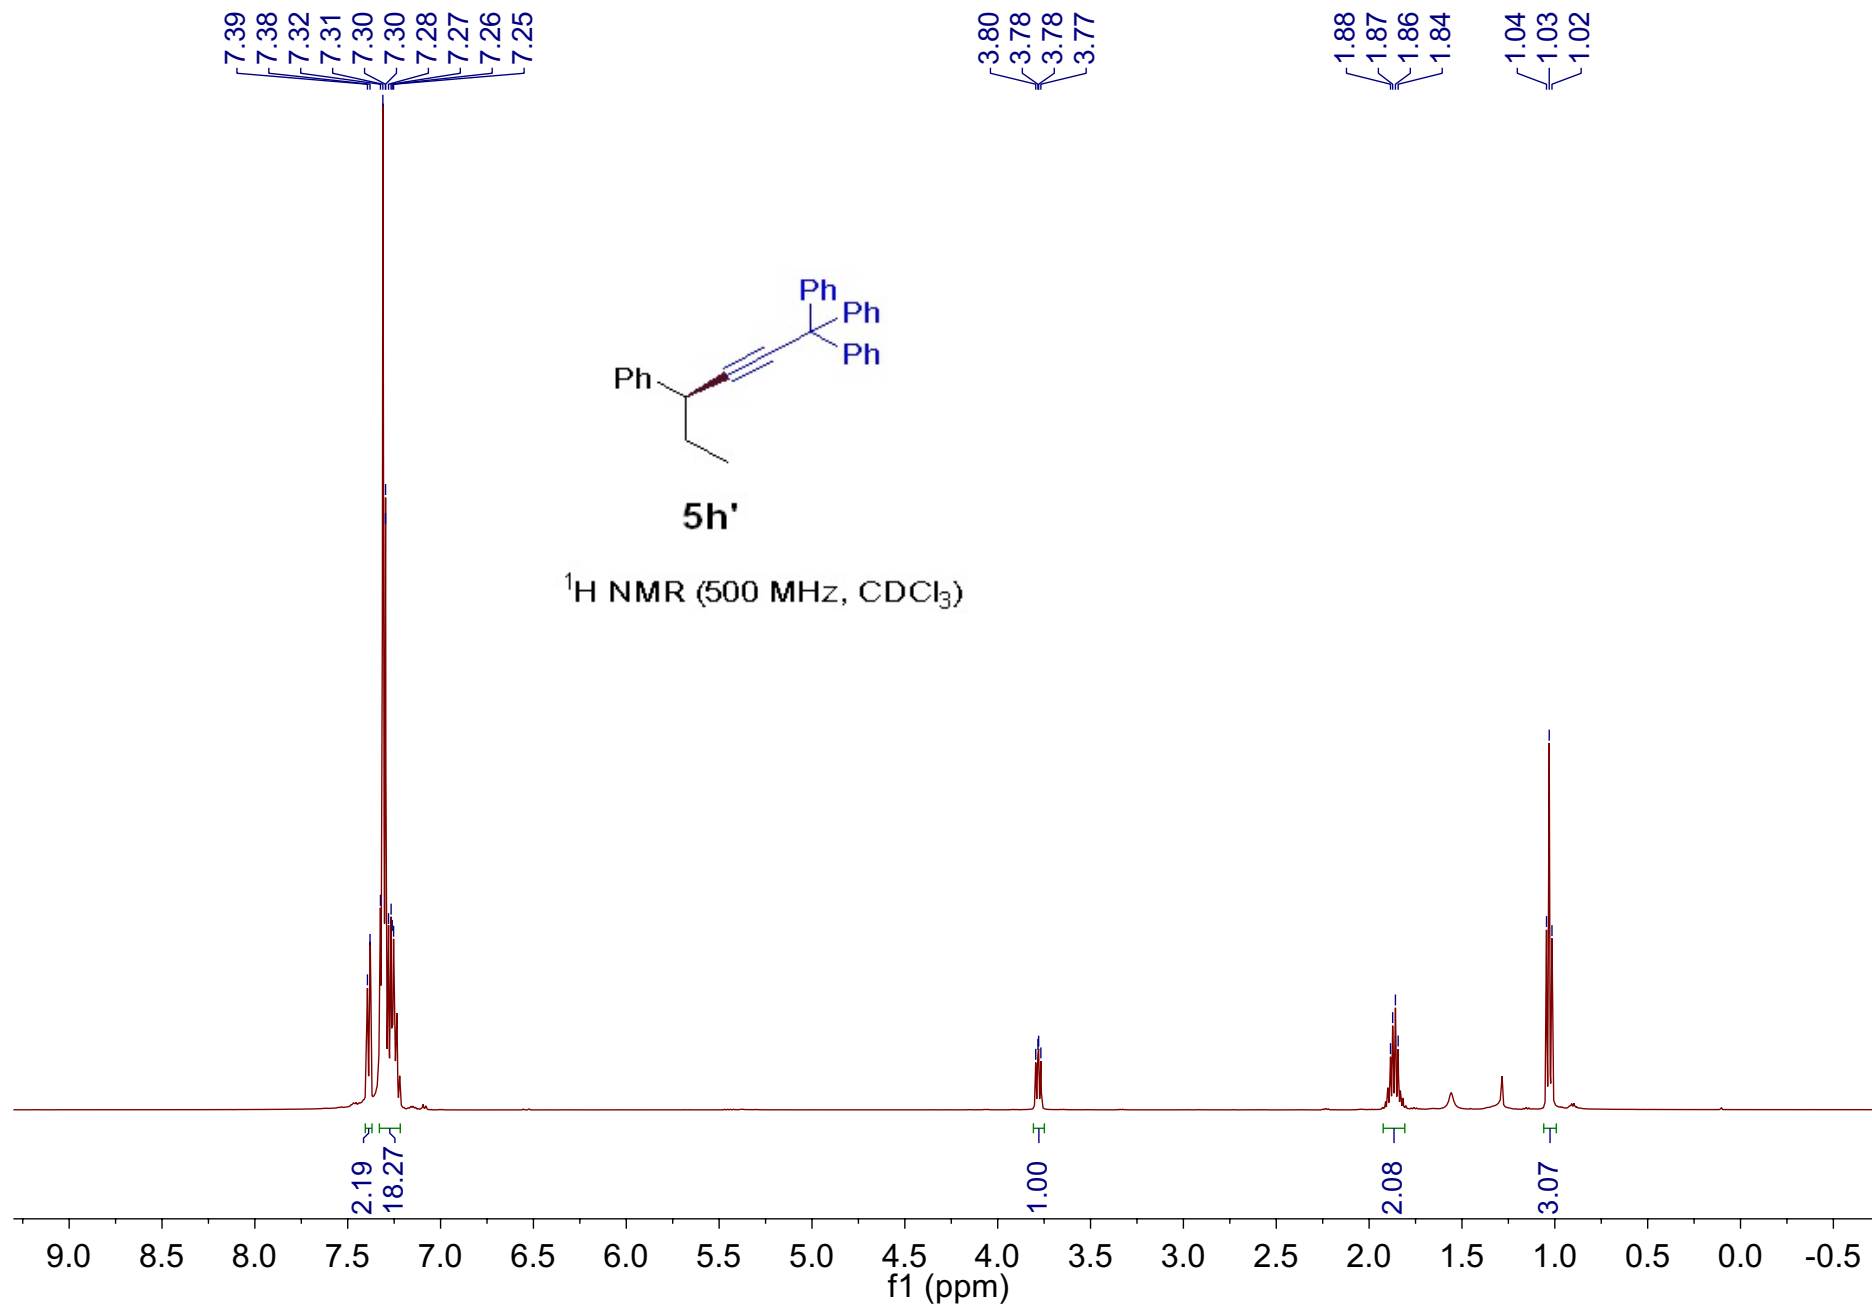

Supplementary Fig. 174. <sup>1</sup>H NMR (500 MHz, CDCl<sub>3</sub>) spectra for compound **5h'**

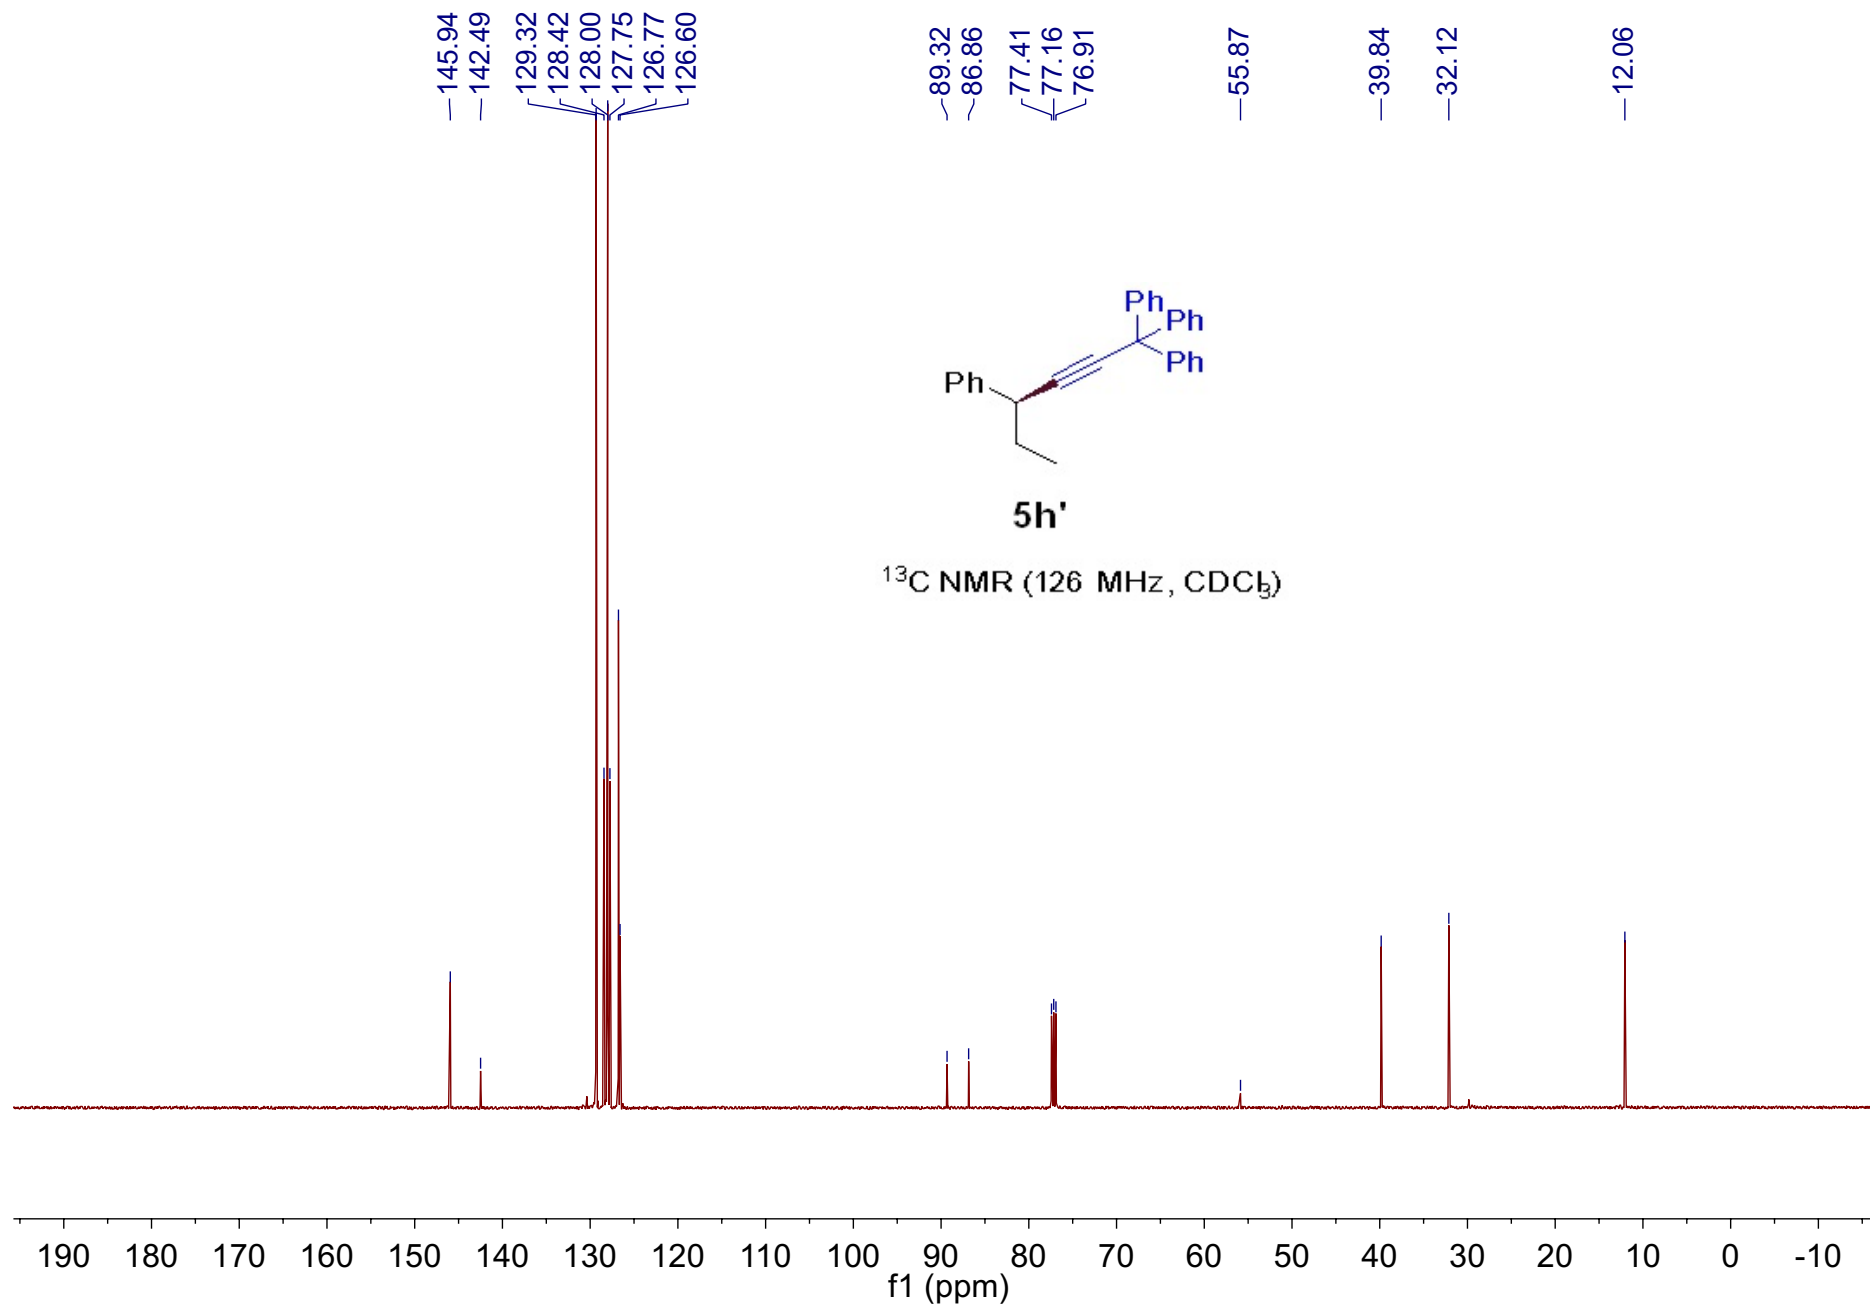

**Supplementary Fig. 175.** <sup>13</sup>C NMR (126 MHz, CDCl<sub>3</sub>) spectra for compound **5h'**

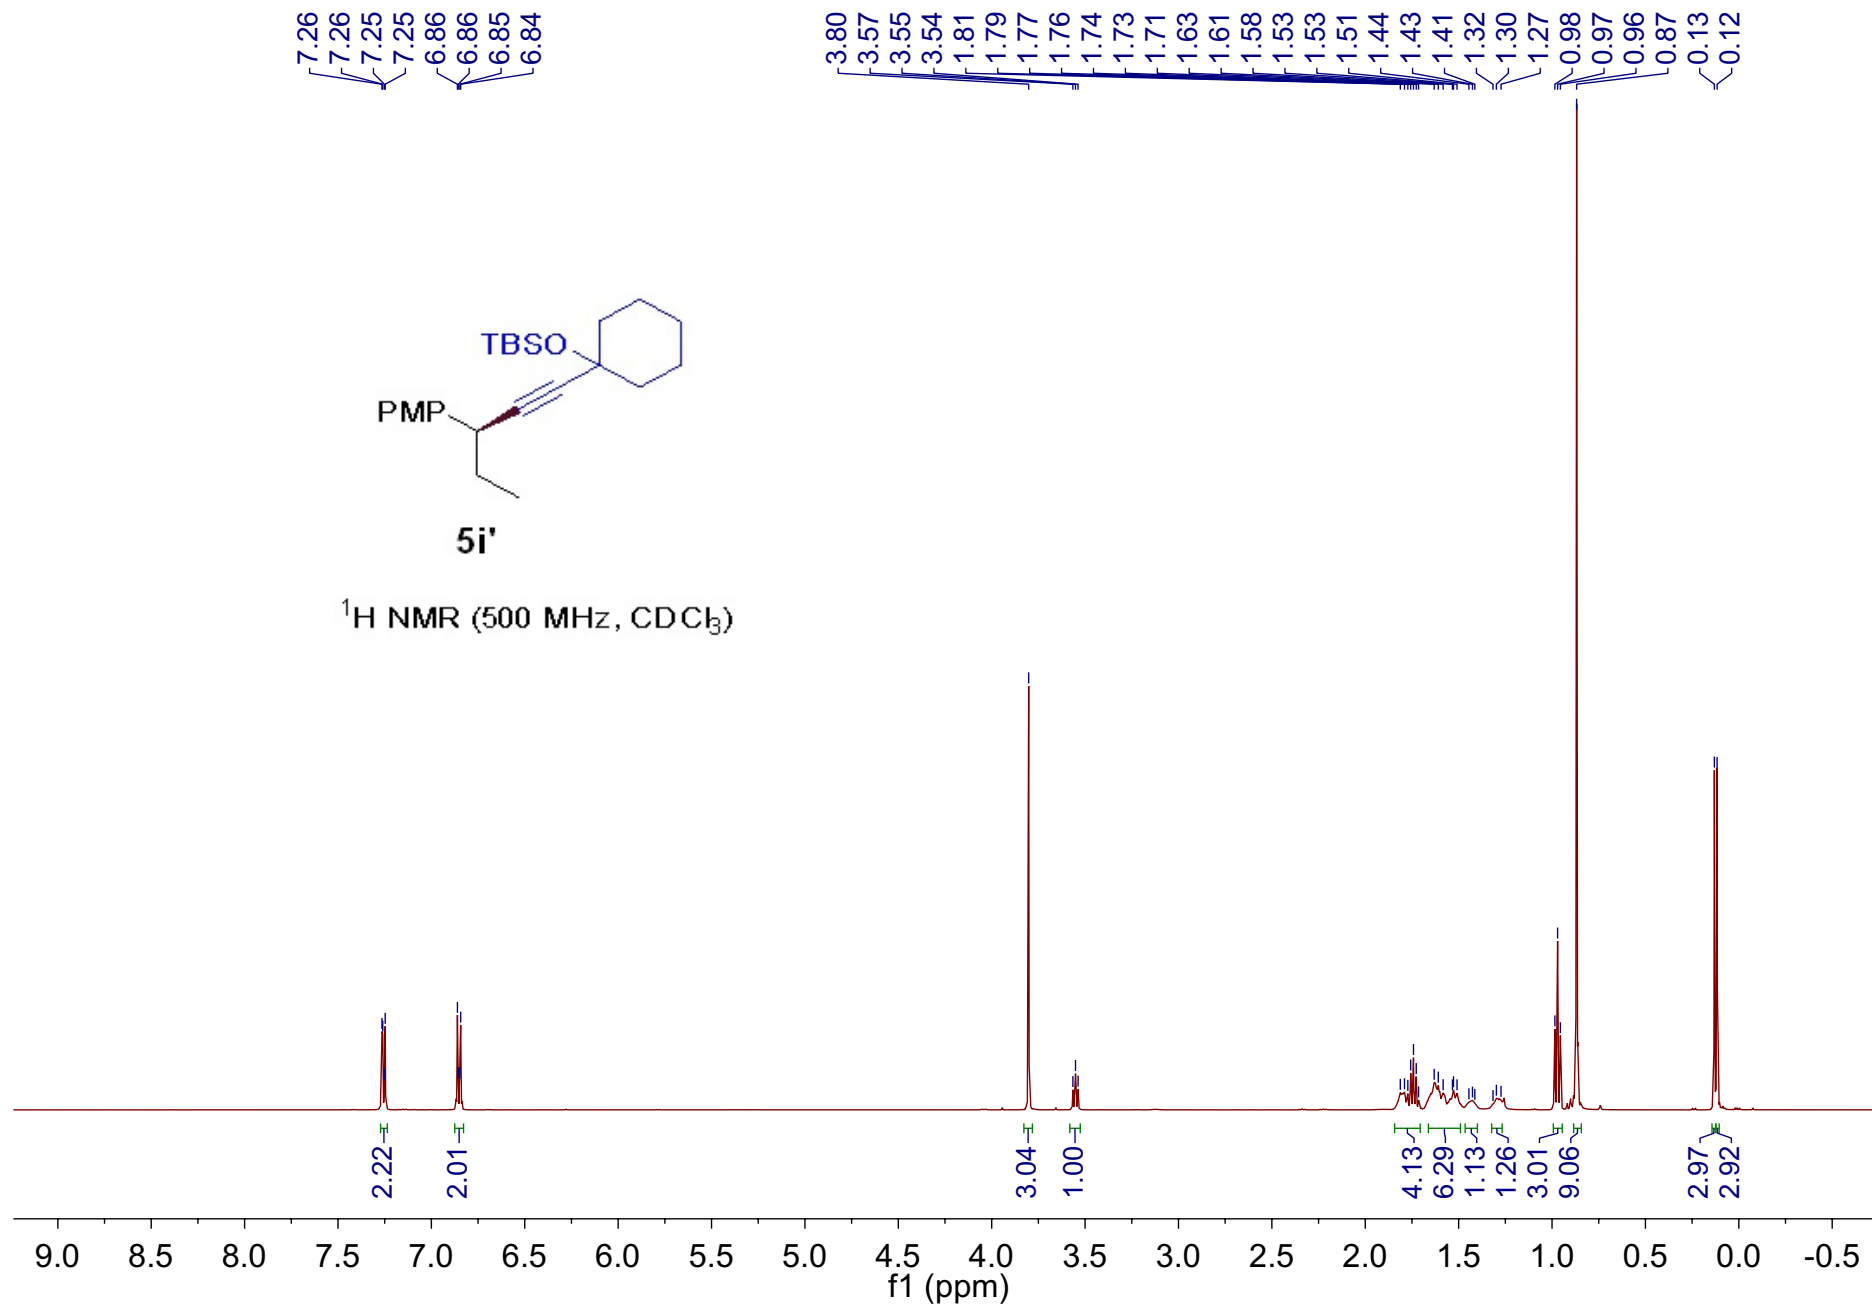

Supplementary Fig. 176. <sup>1</sup>H NMR (500 MHz, CDCl<sub>3</sub>) spectra for compound **5i'**

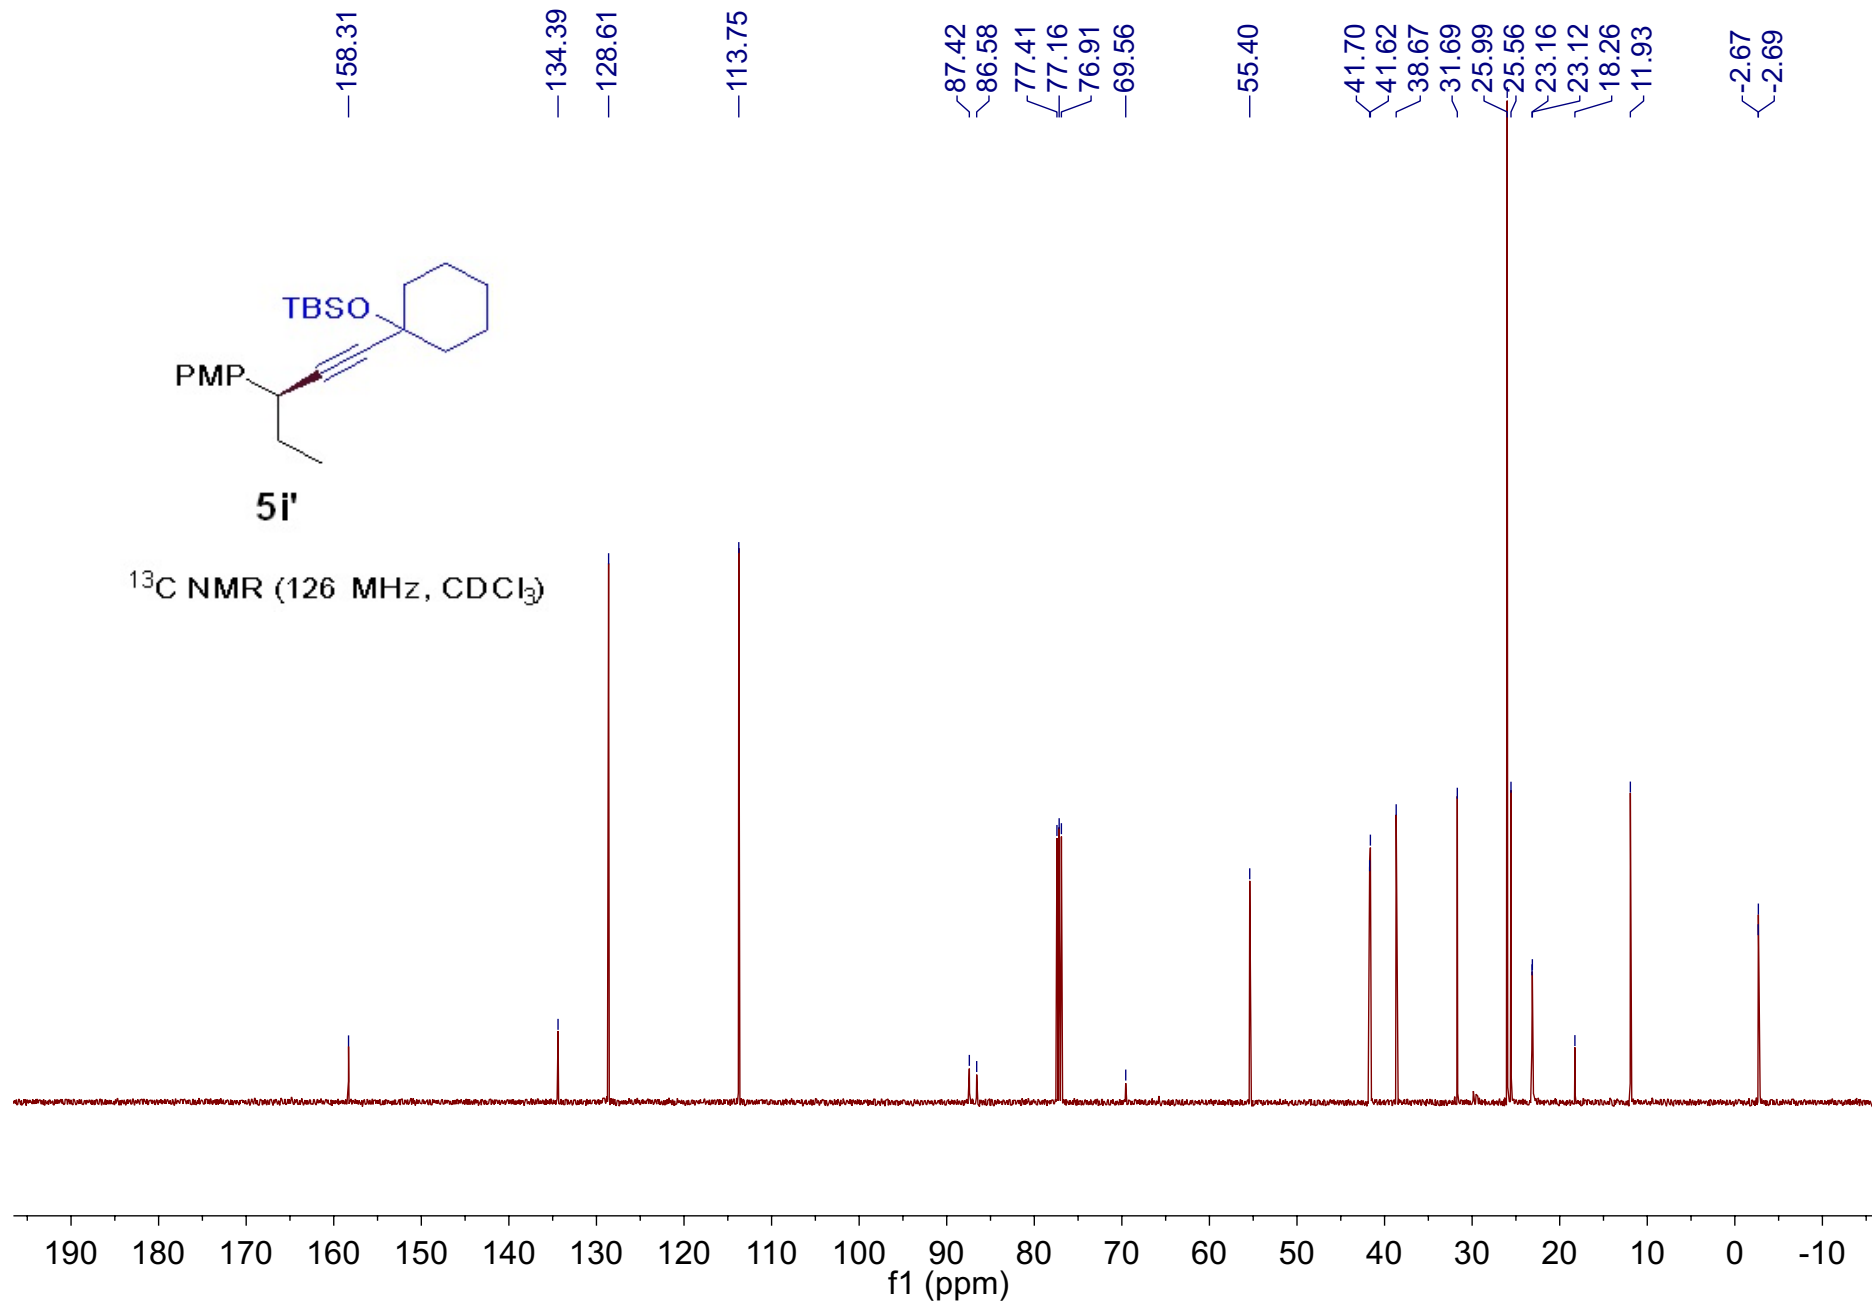

Supplementary Fig. 177. <sup>13</sup>C NMR (126 MHz, CDCl<sub>3</sub>) spectra for compound **5i'**

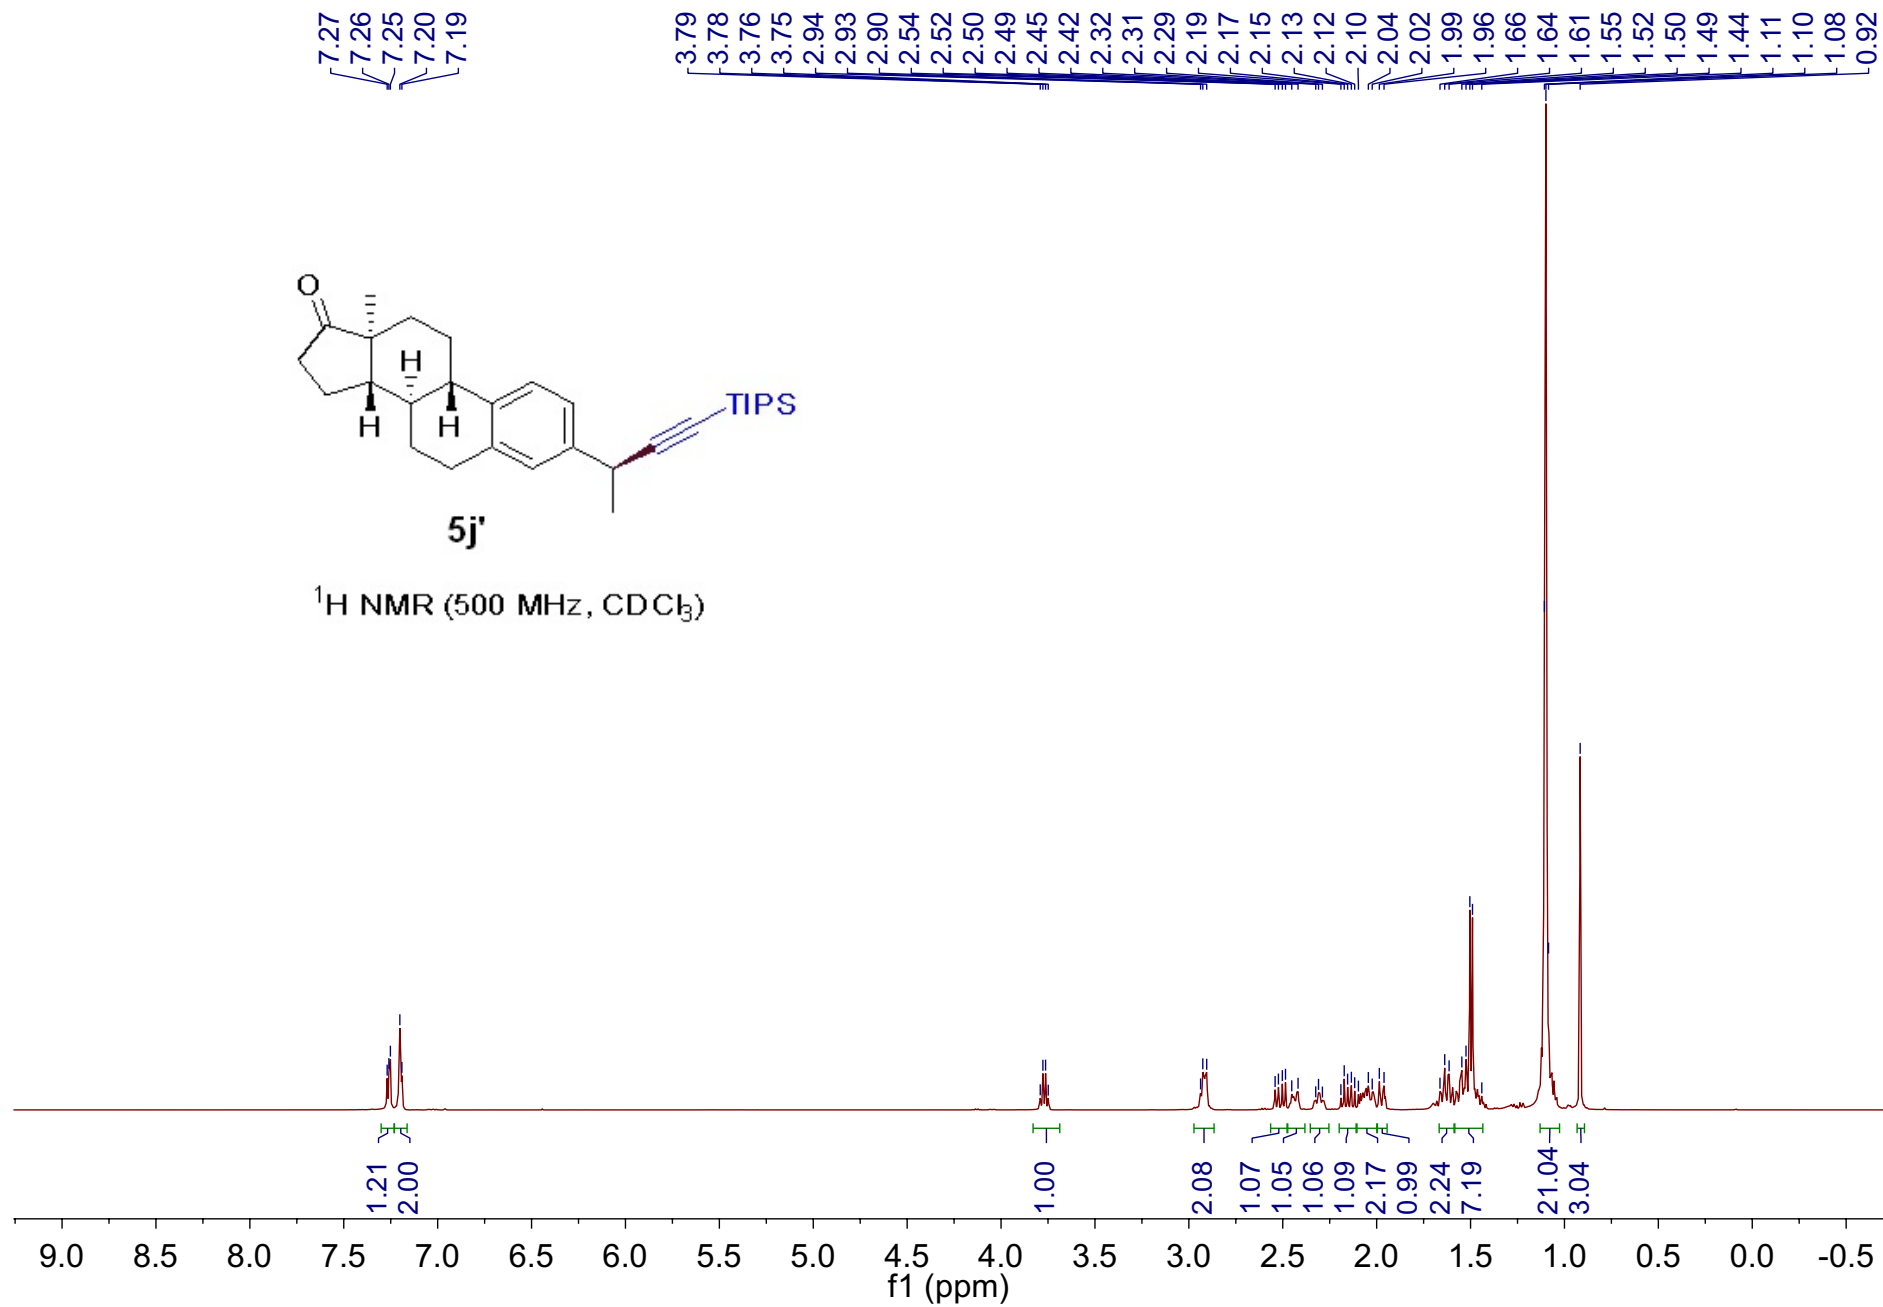

Supplementary Fig. 178.  $^1\text{H}$  NMR (500 MHz,  $\text{CDCl}_3$ ) spectra for compound **5j'**

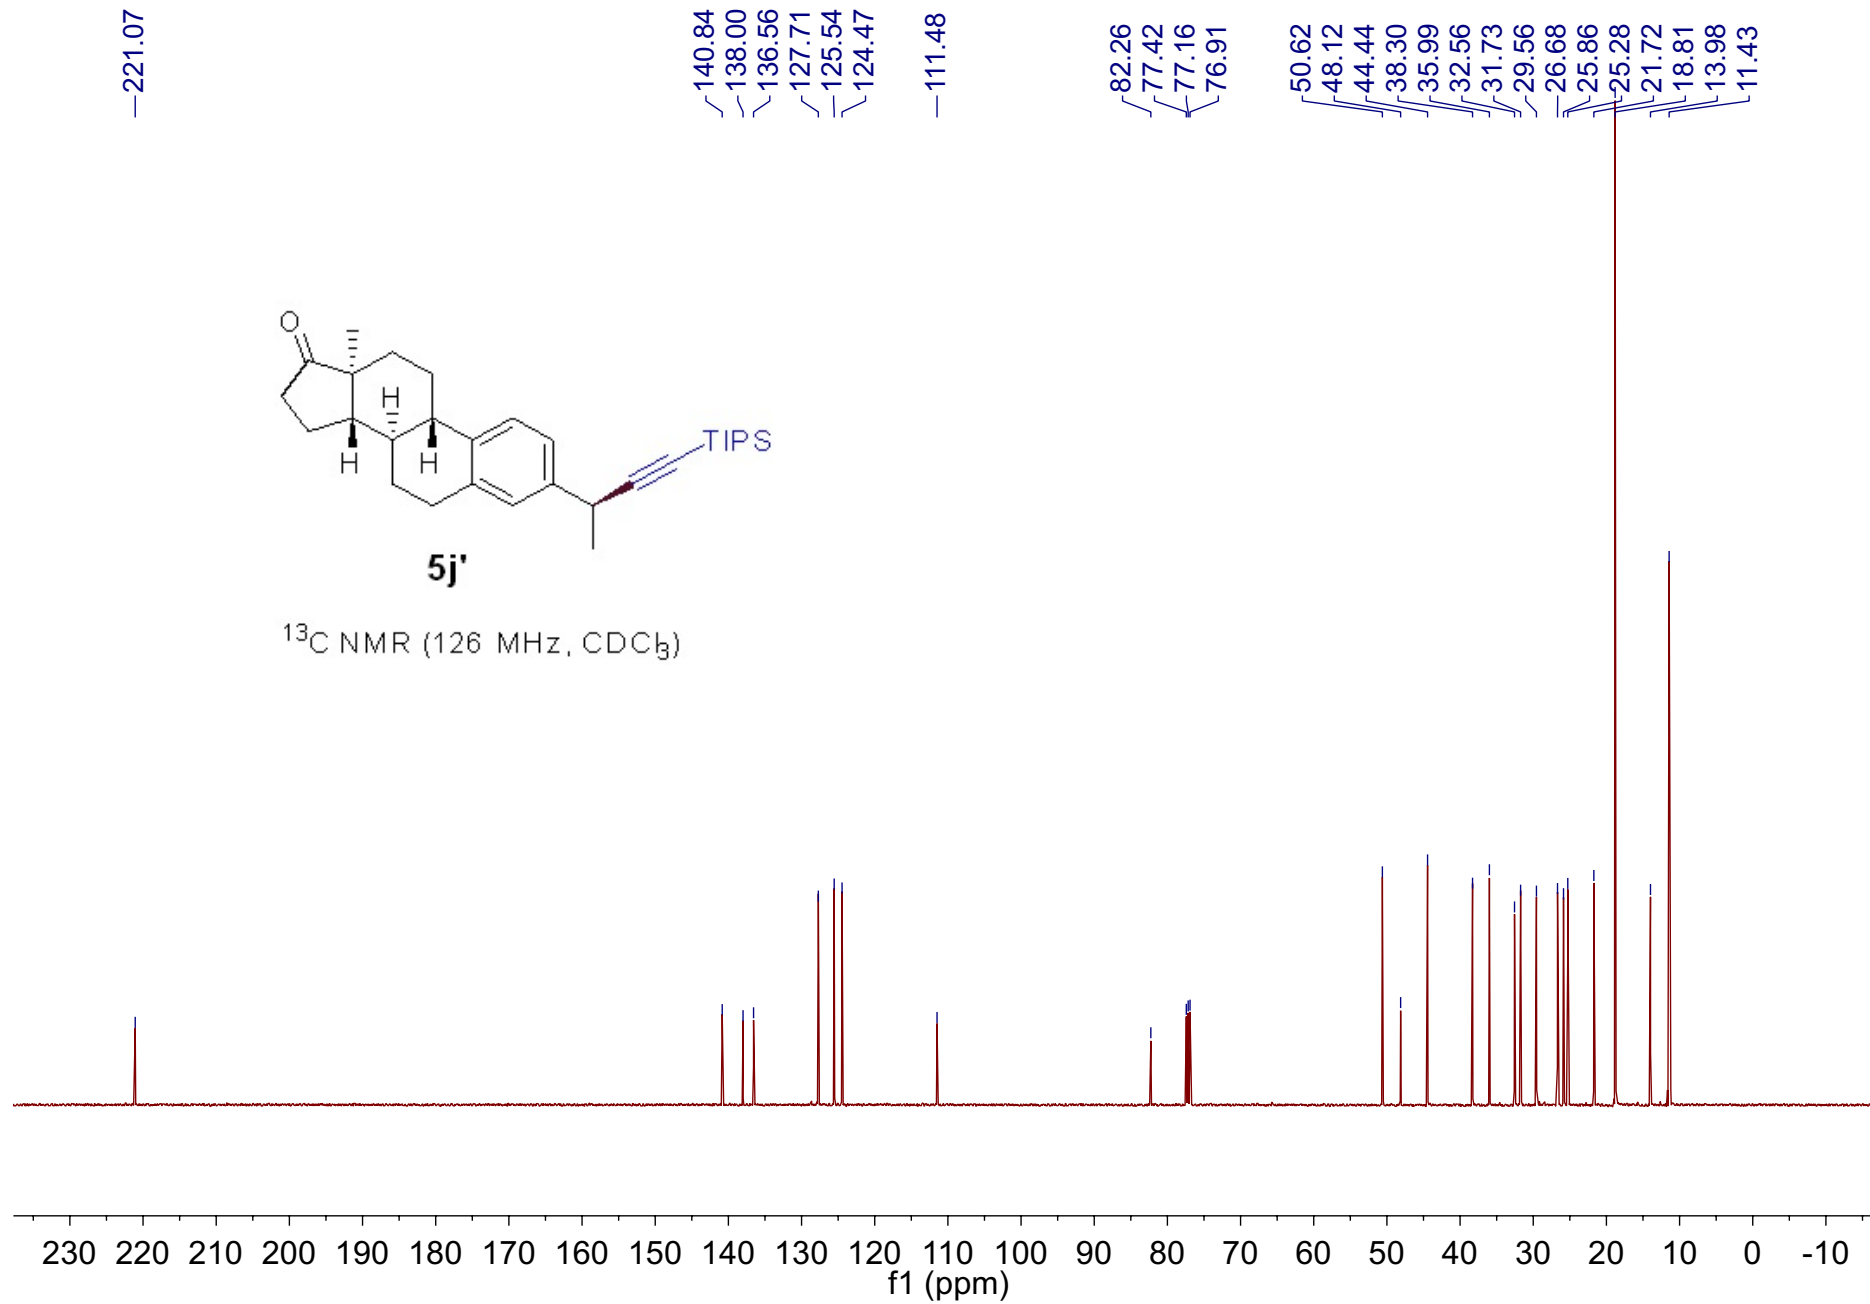

**Supplementary Fig. 179.**  $^{13}\text{C}$  NMR (126 MHz,  $\text{CDCl}_3$ ) spectra for compound **5j'**

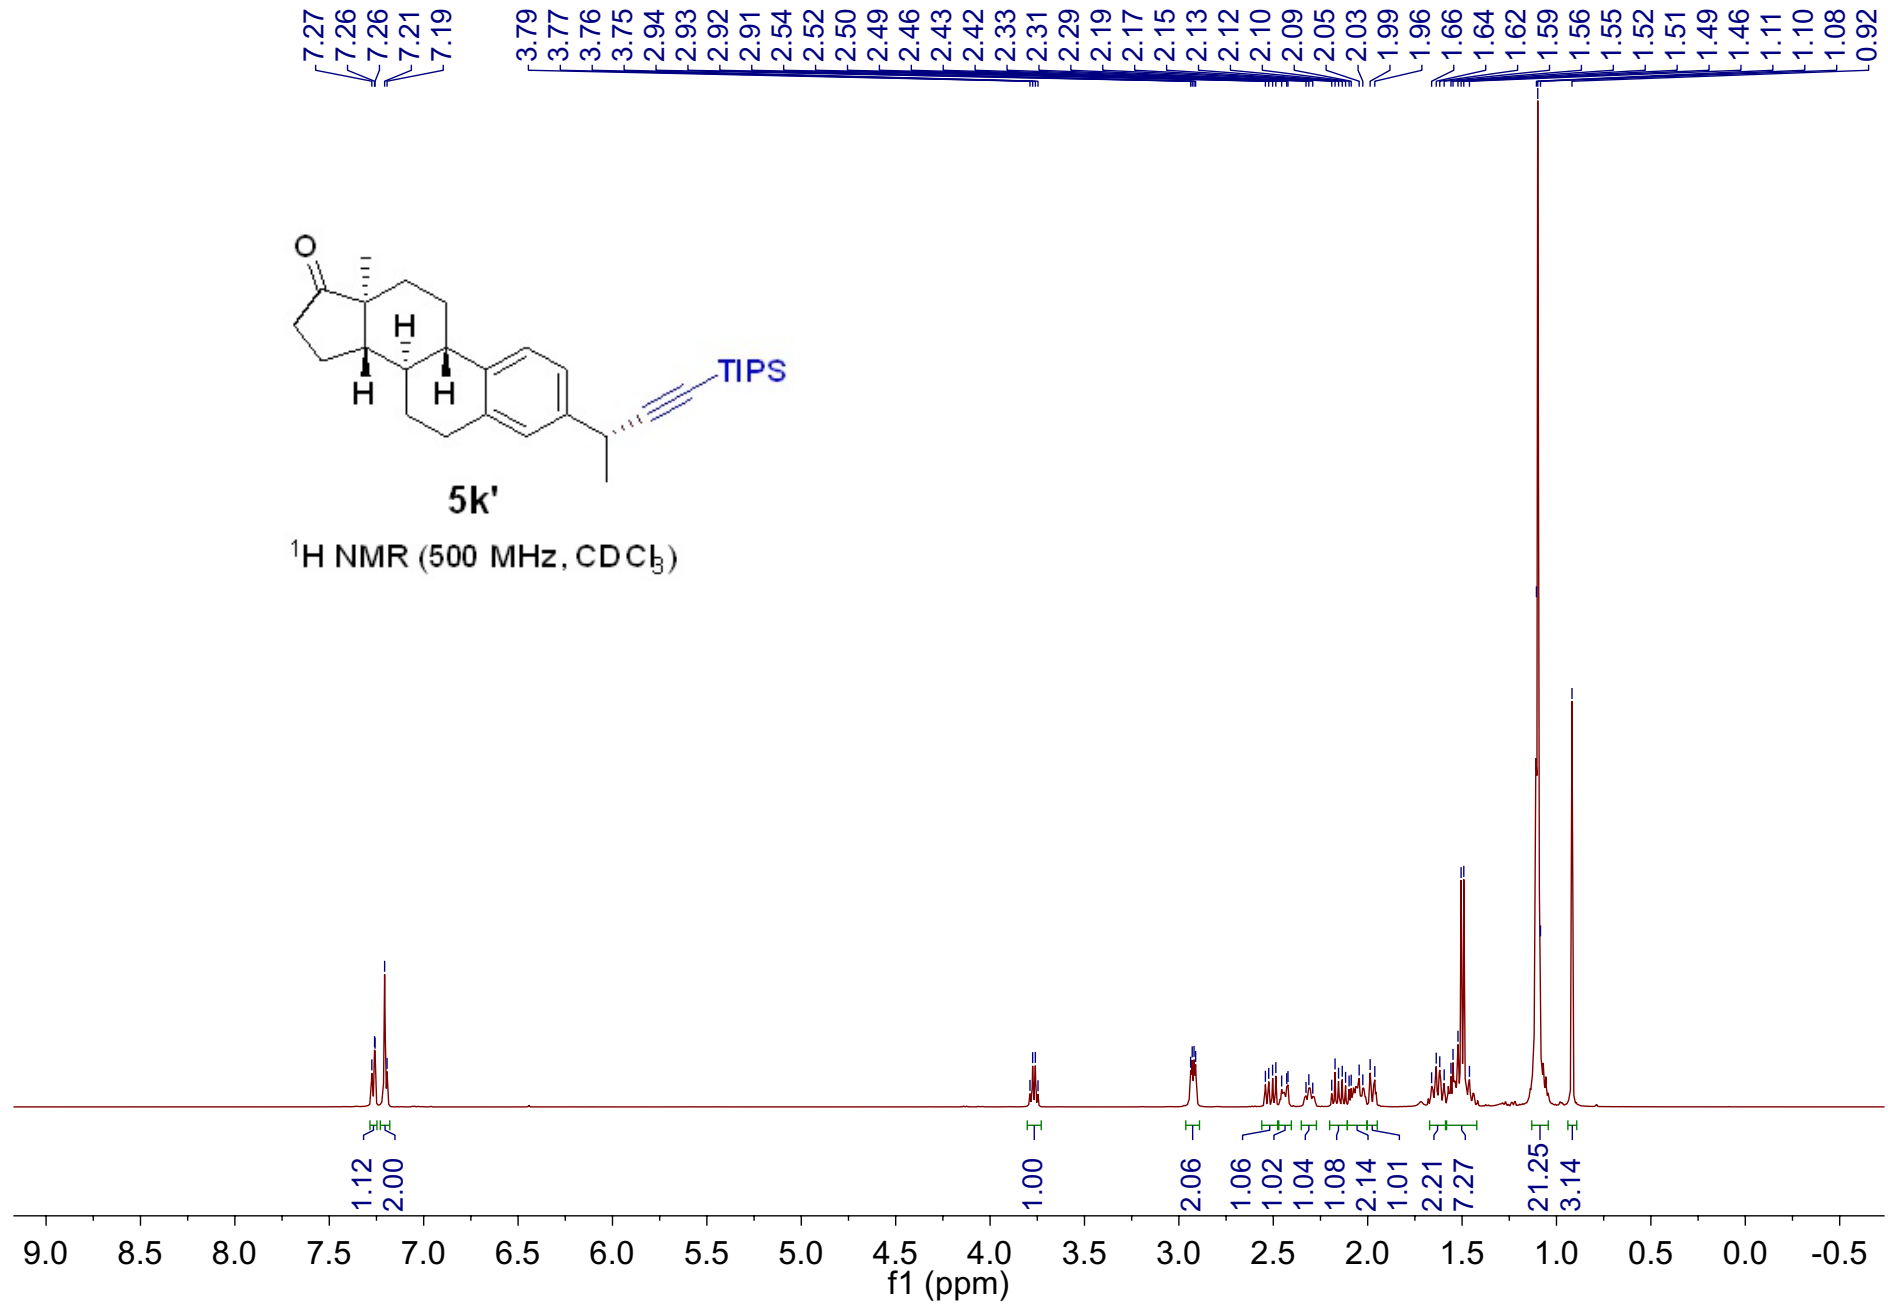

Supplementary Fig. 180. <sup>1</sup>H NMR (500 MHz, CDCl<sub>3</sub>) spectra for compound **5k'**



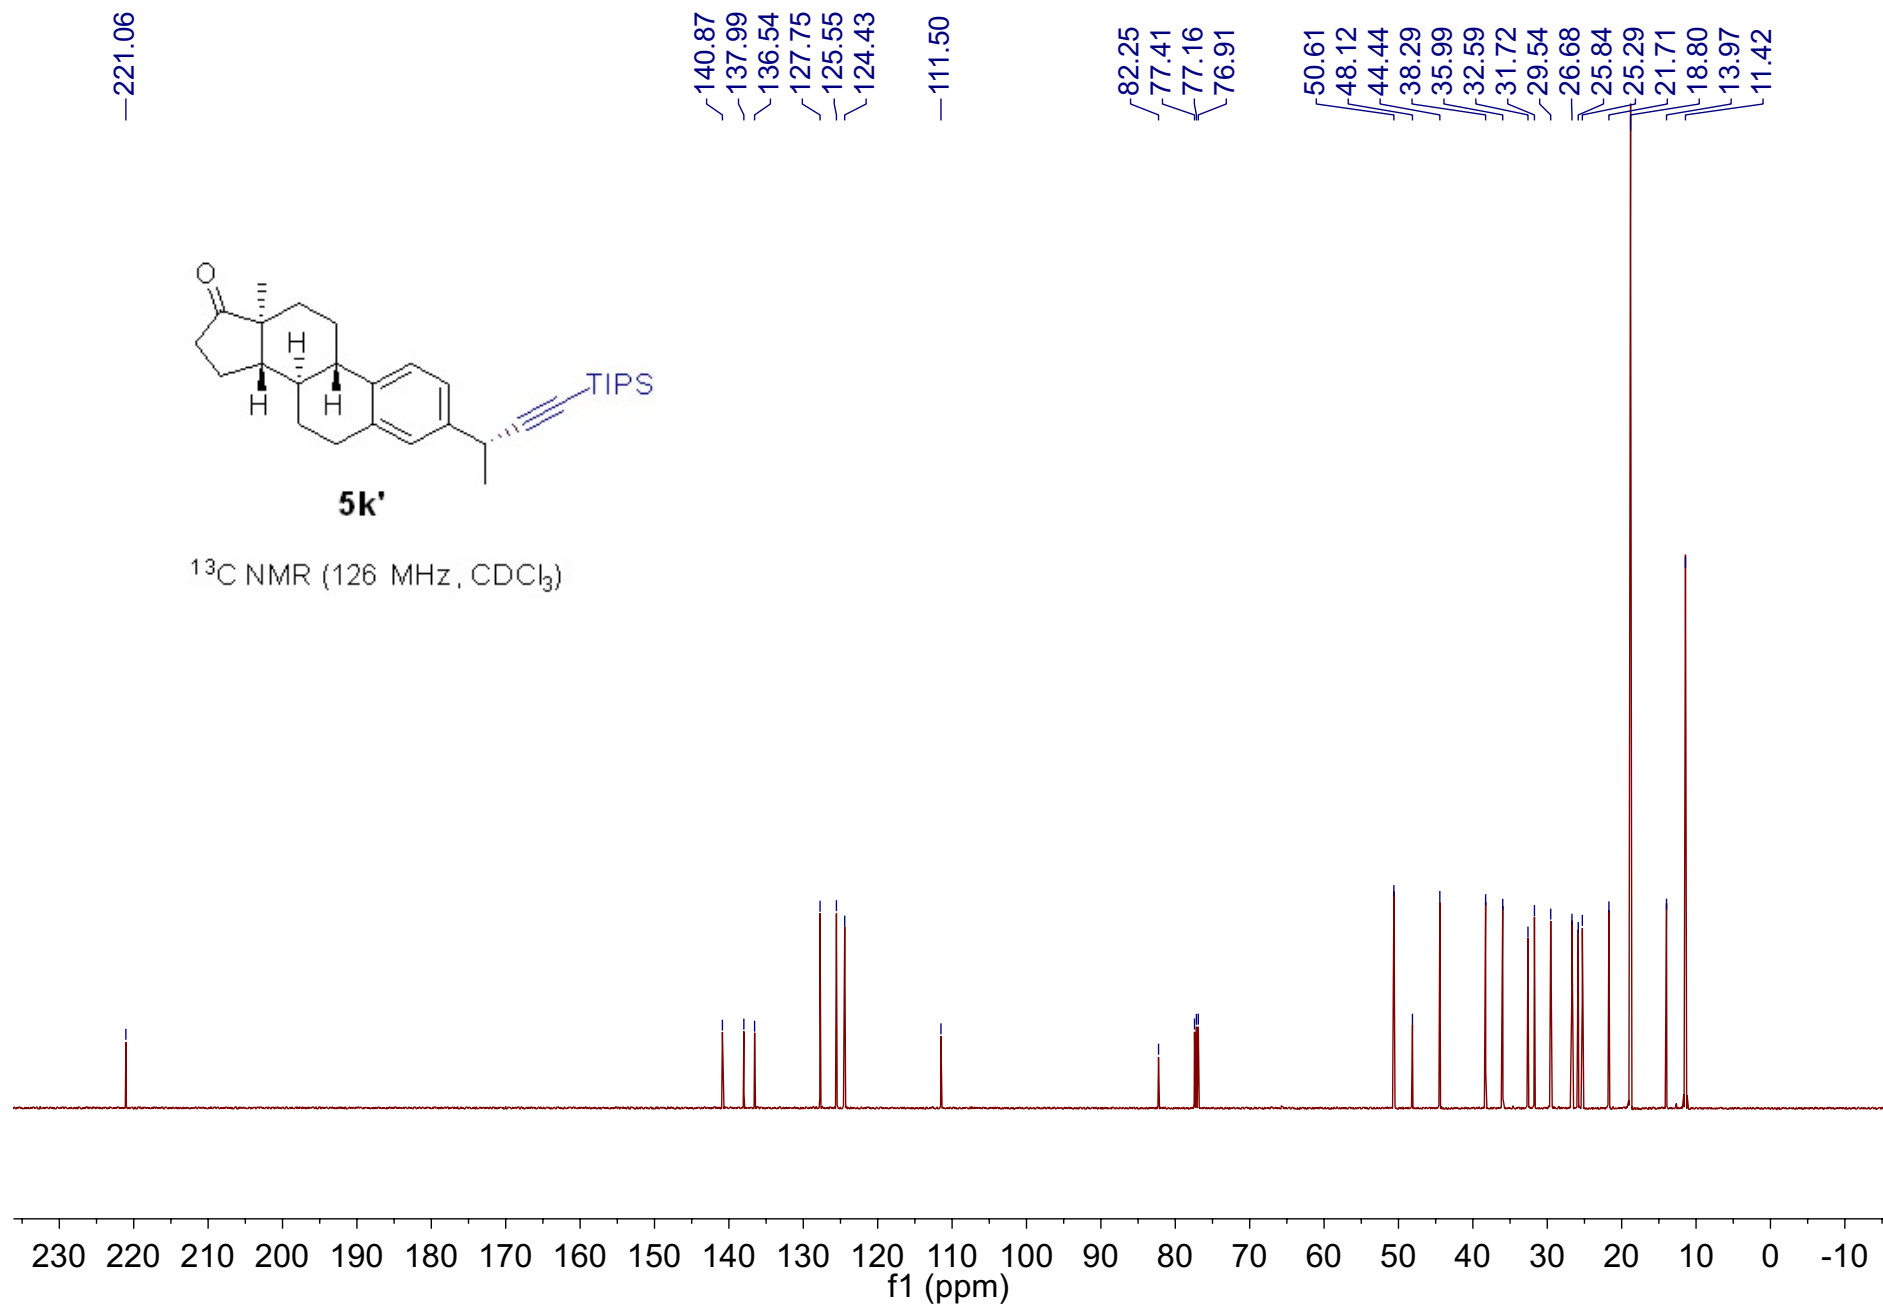

**Supplementary Fig. 181.** <sup>13</sup>C NMR (126 MHz, CDCl<sub>3</sub>) spectra for compound **5k'**

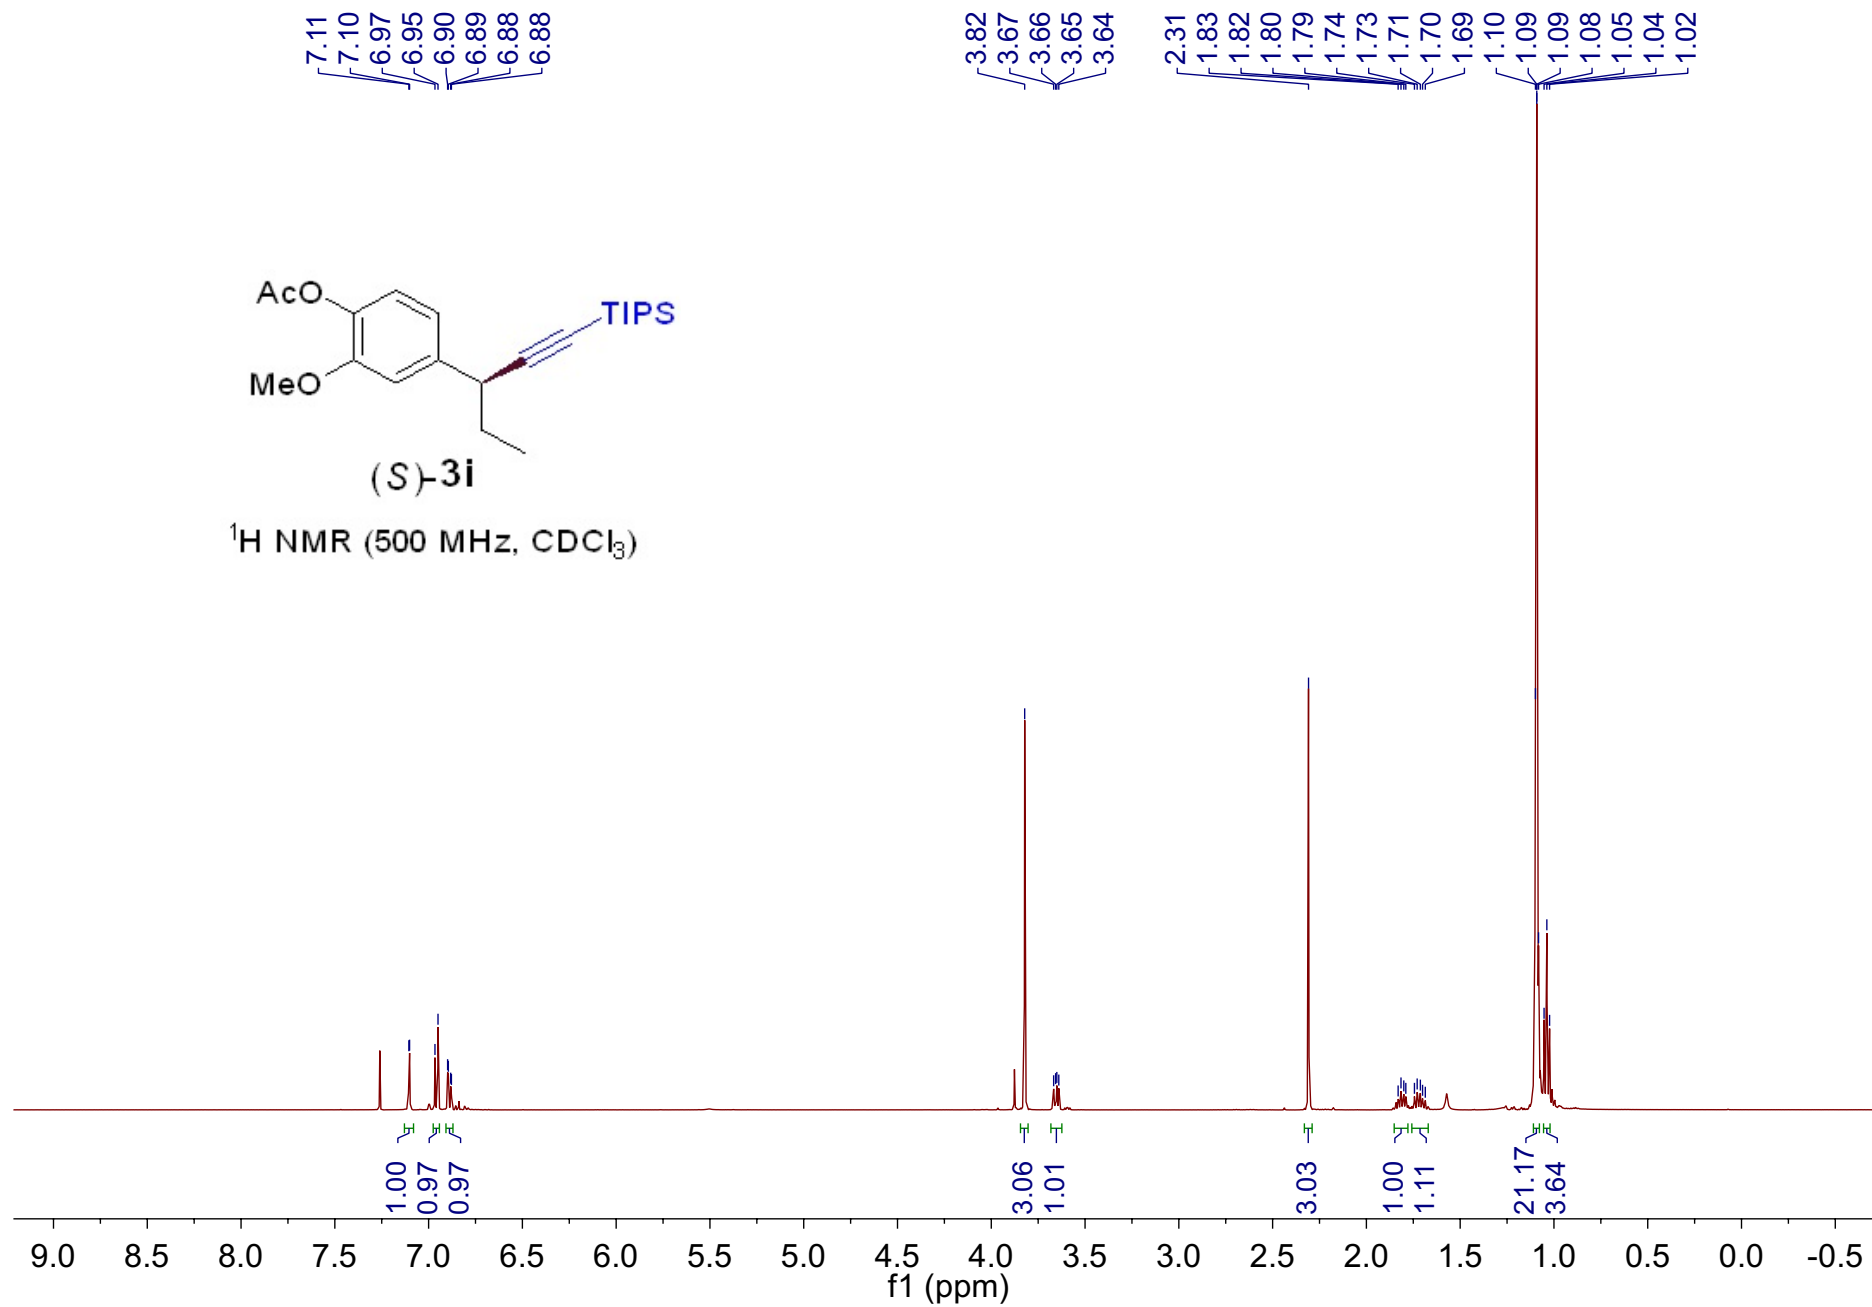

Supplementary Fig. 182. <sup>1</sup>H NMR (500 MHz, CDCl<sub>3</sub>) spectra for compound (S)-3i

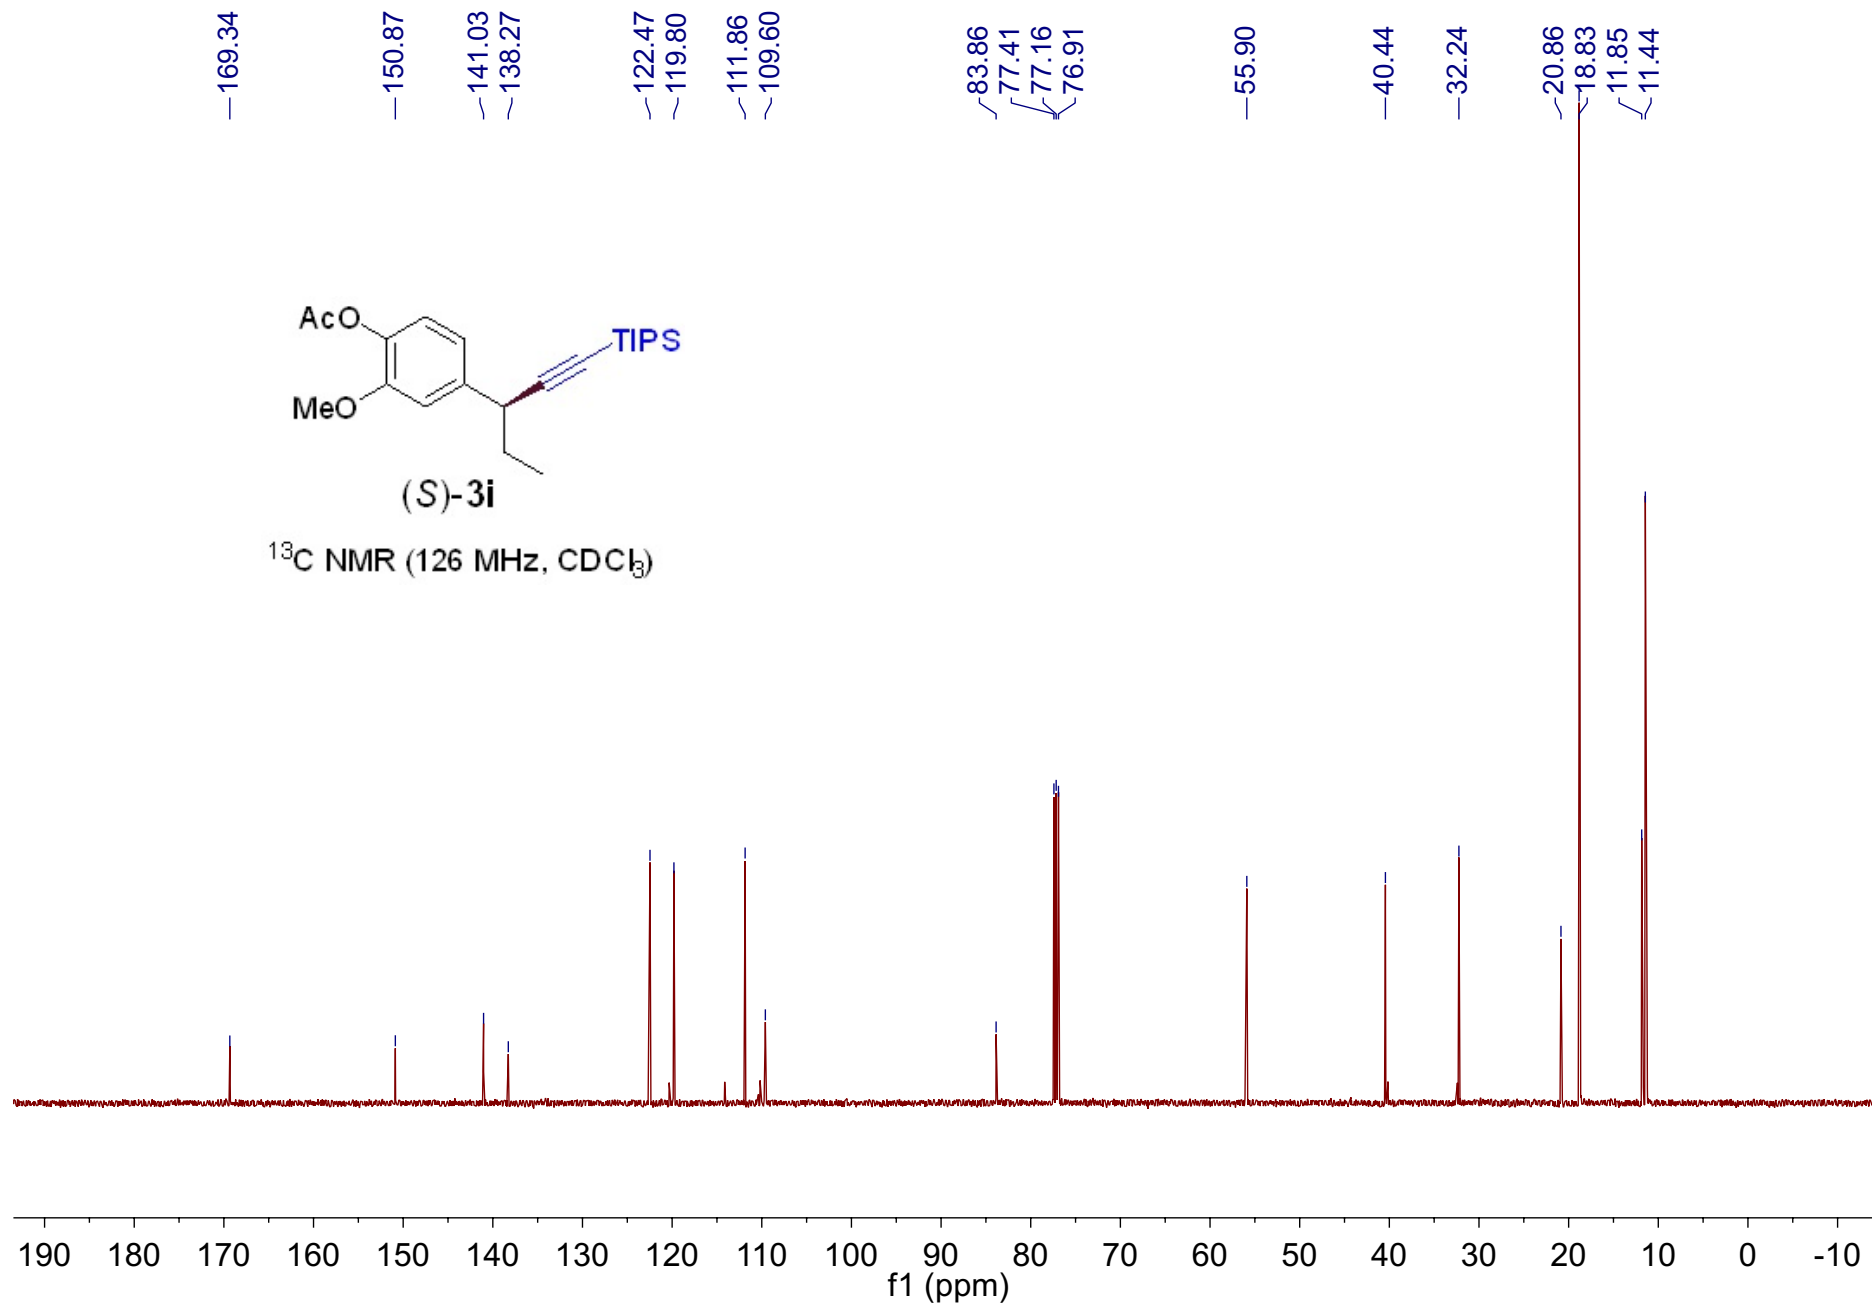

Supplementary Fig. 183.  $^{13}\text{C}$  NMR (126 MHz,  $\text{CDCl}_3$ ) spectra for compound (S)-3i

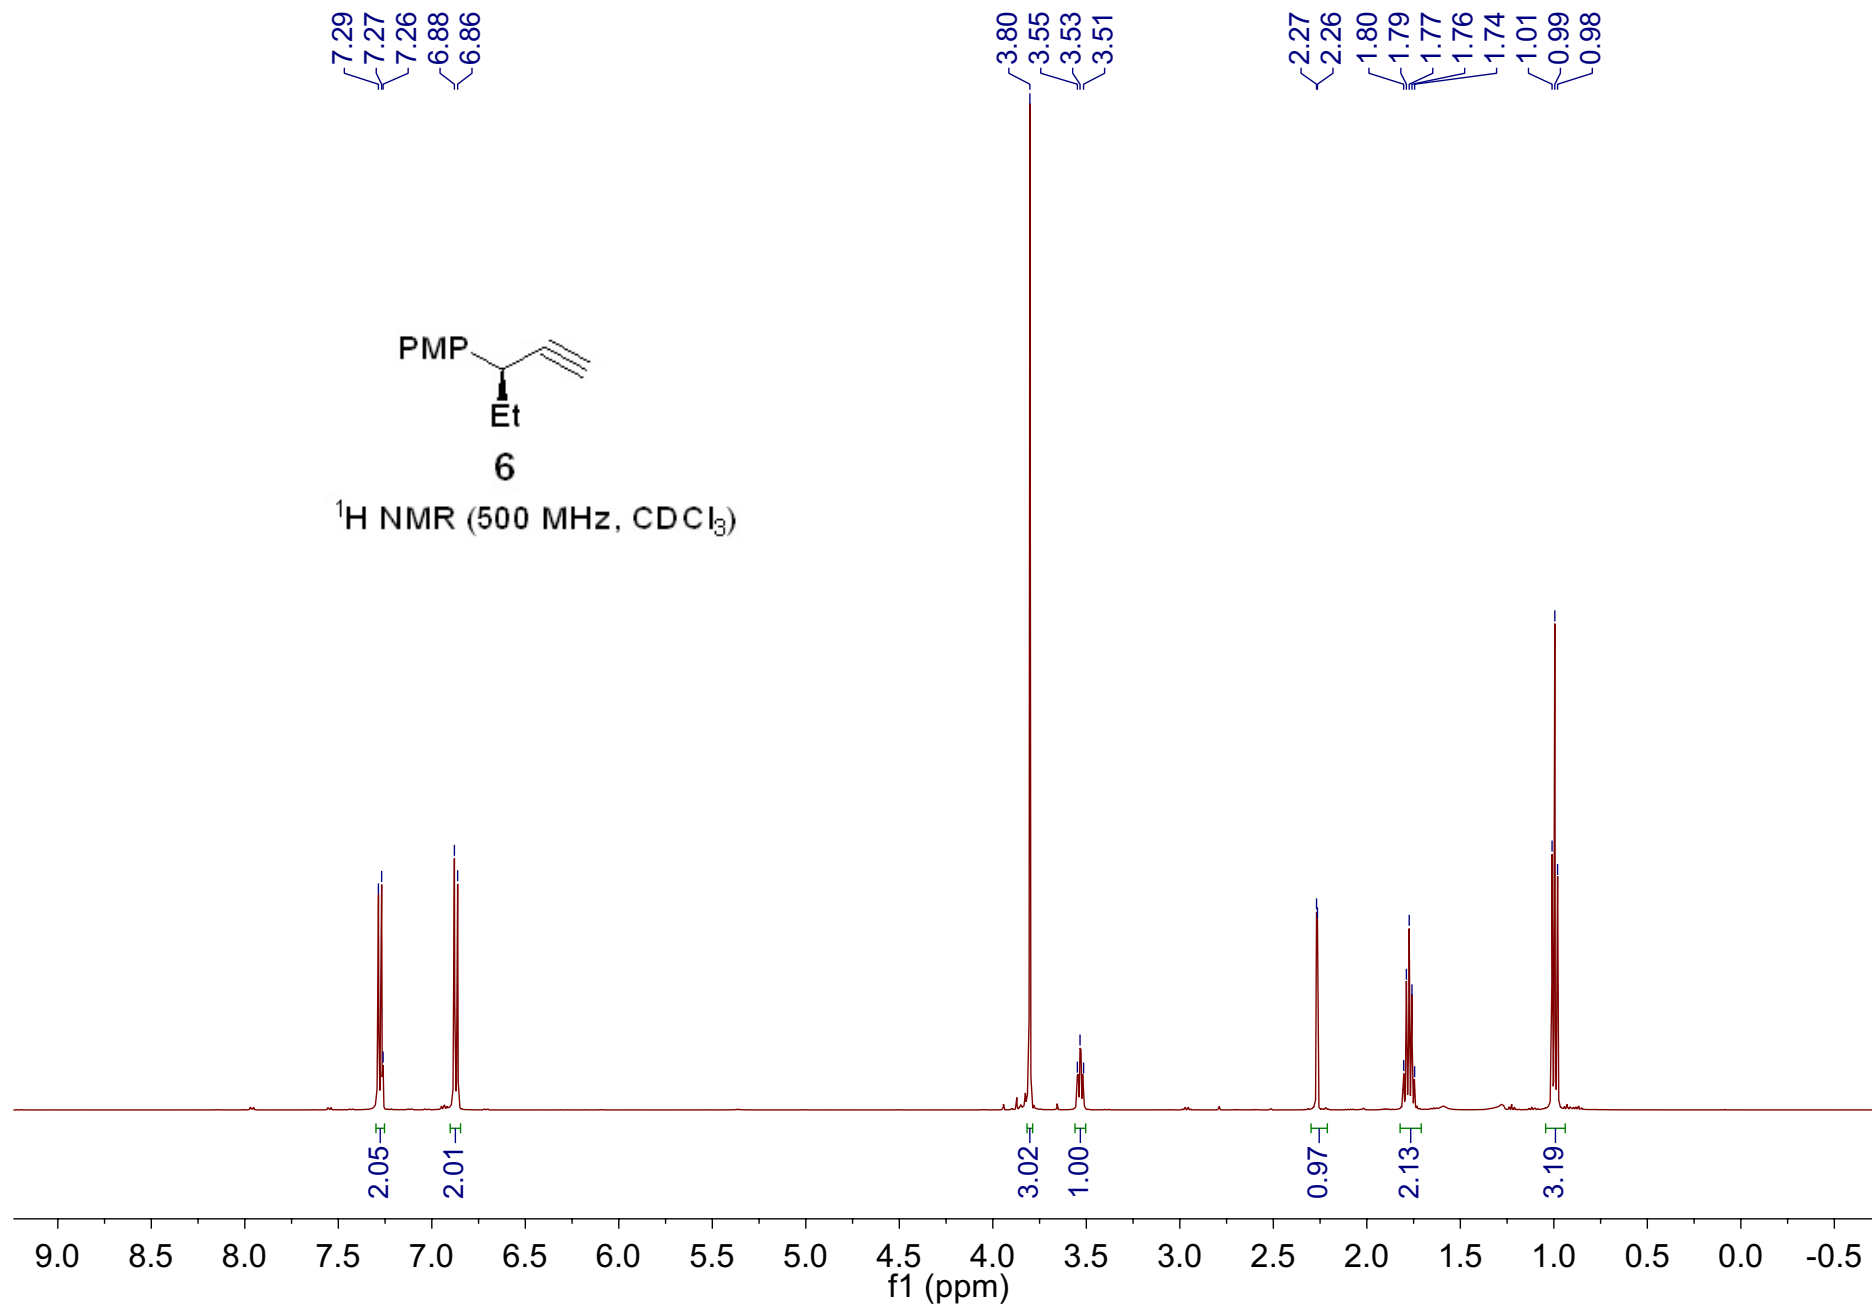

**Supplementary Fig. 184.** <sup>1</sup>H NMR (500 MHz, CDCl<sub>3</sub>) spectra for compound **6**

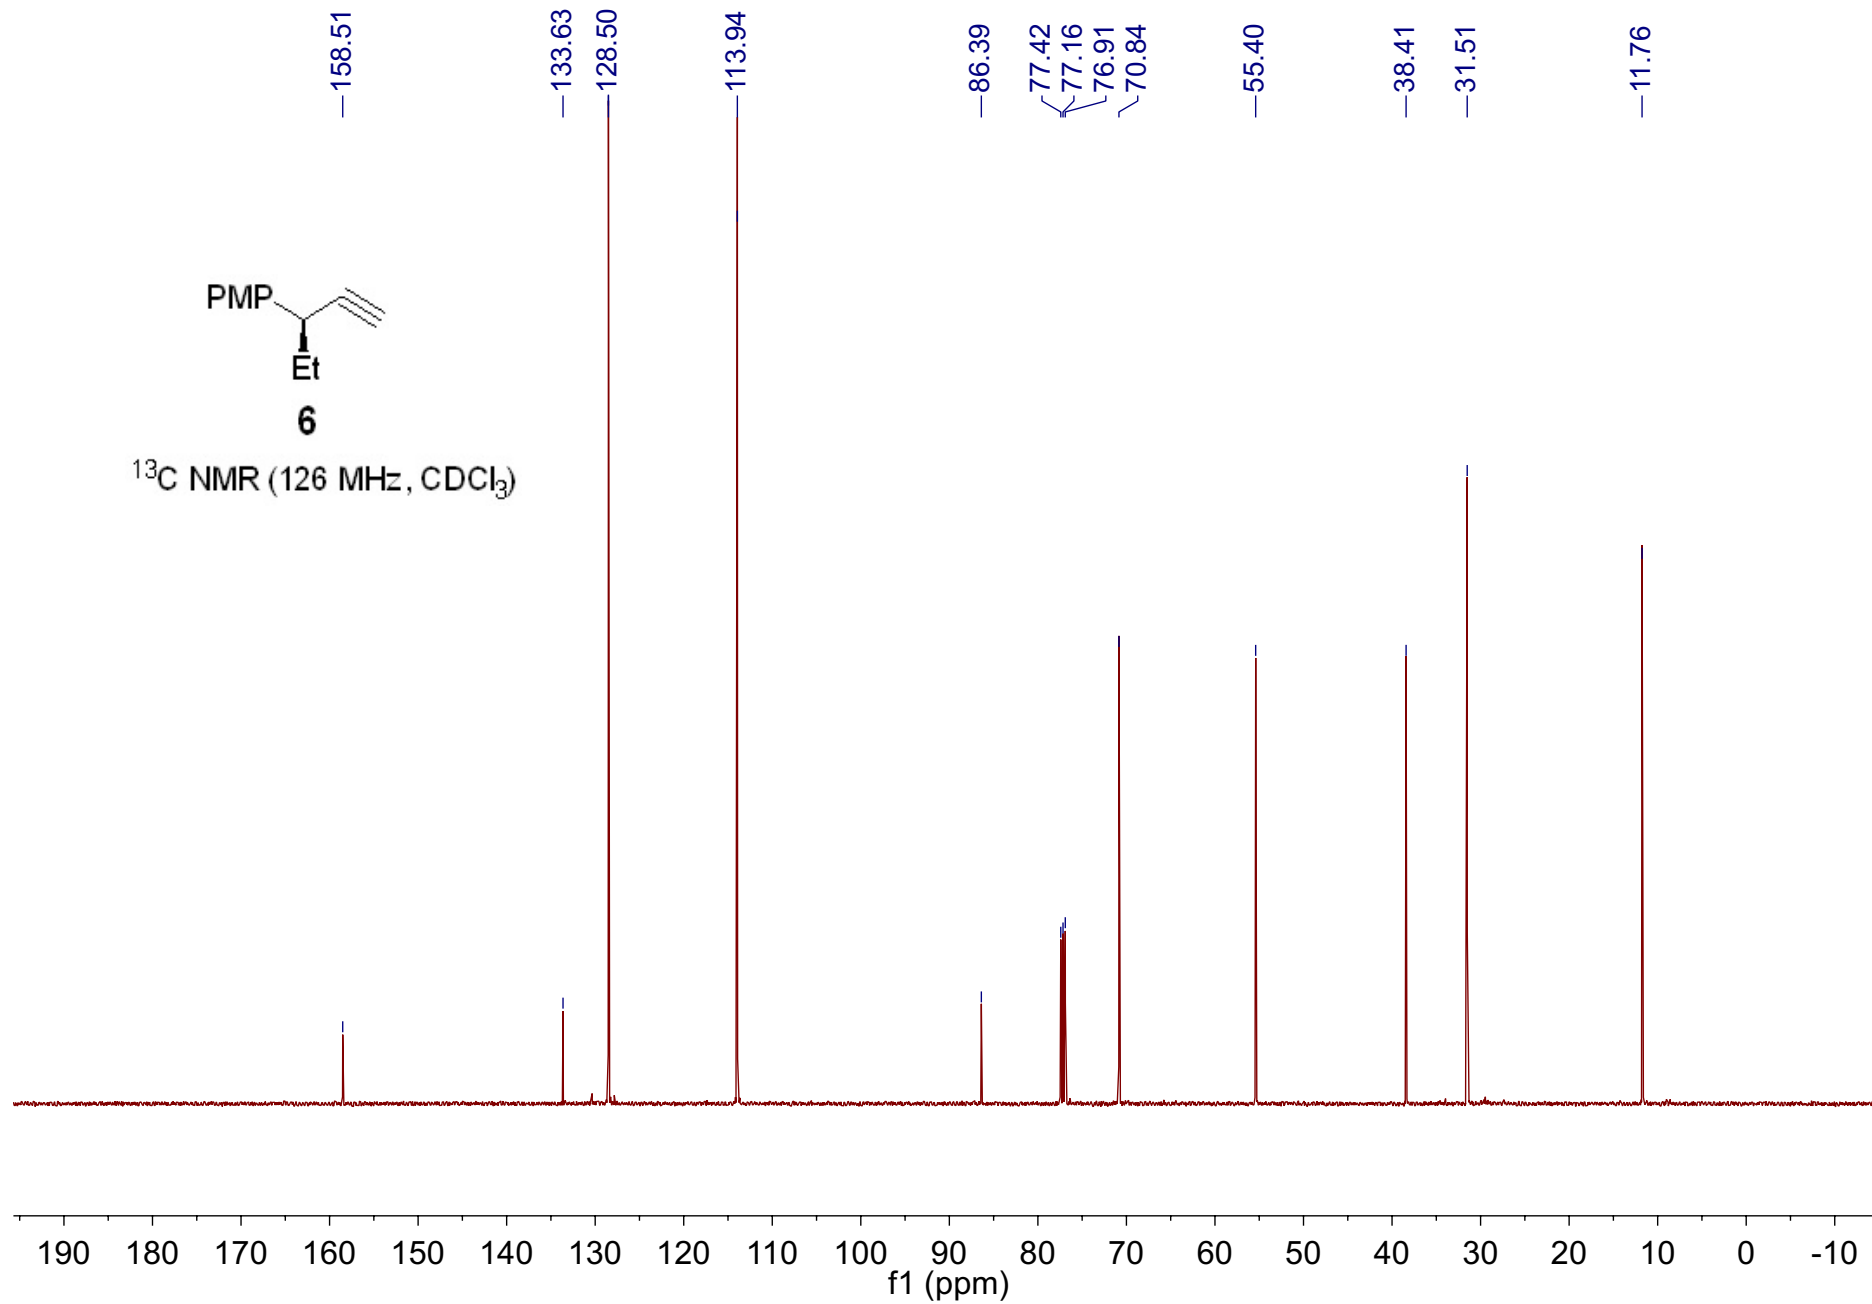

**Supplementary Fig. 185.**  $^{13}\text{C}$  NMR (126 MHz,  $\text{CDCl}_3$ ) spectra for compound **6**

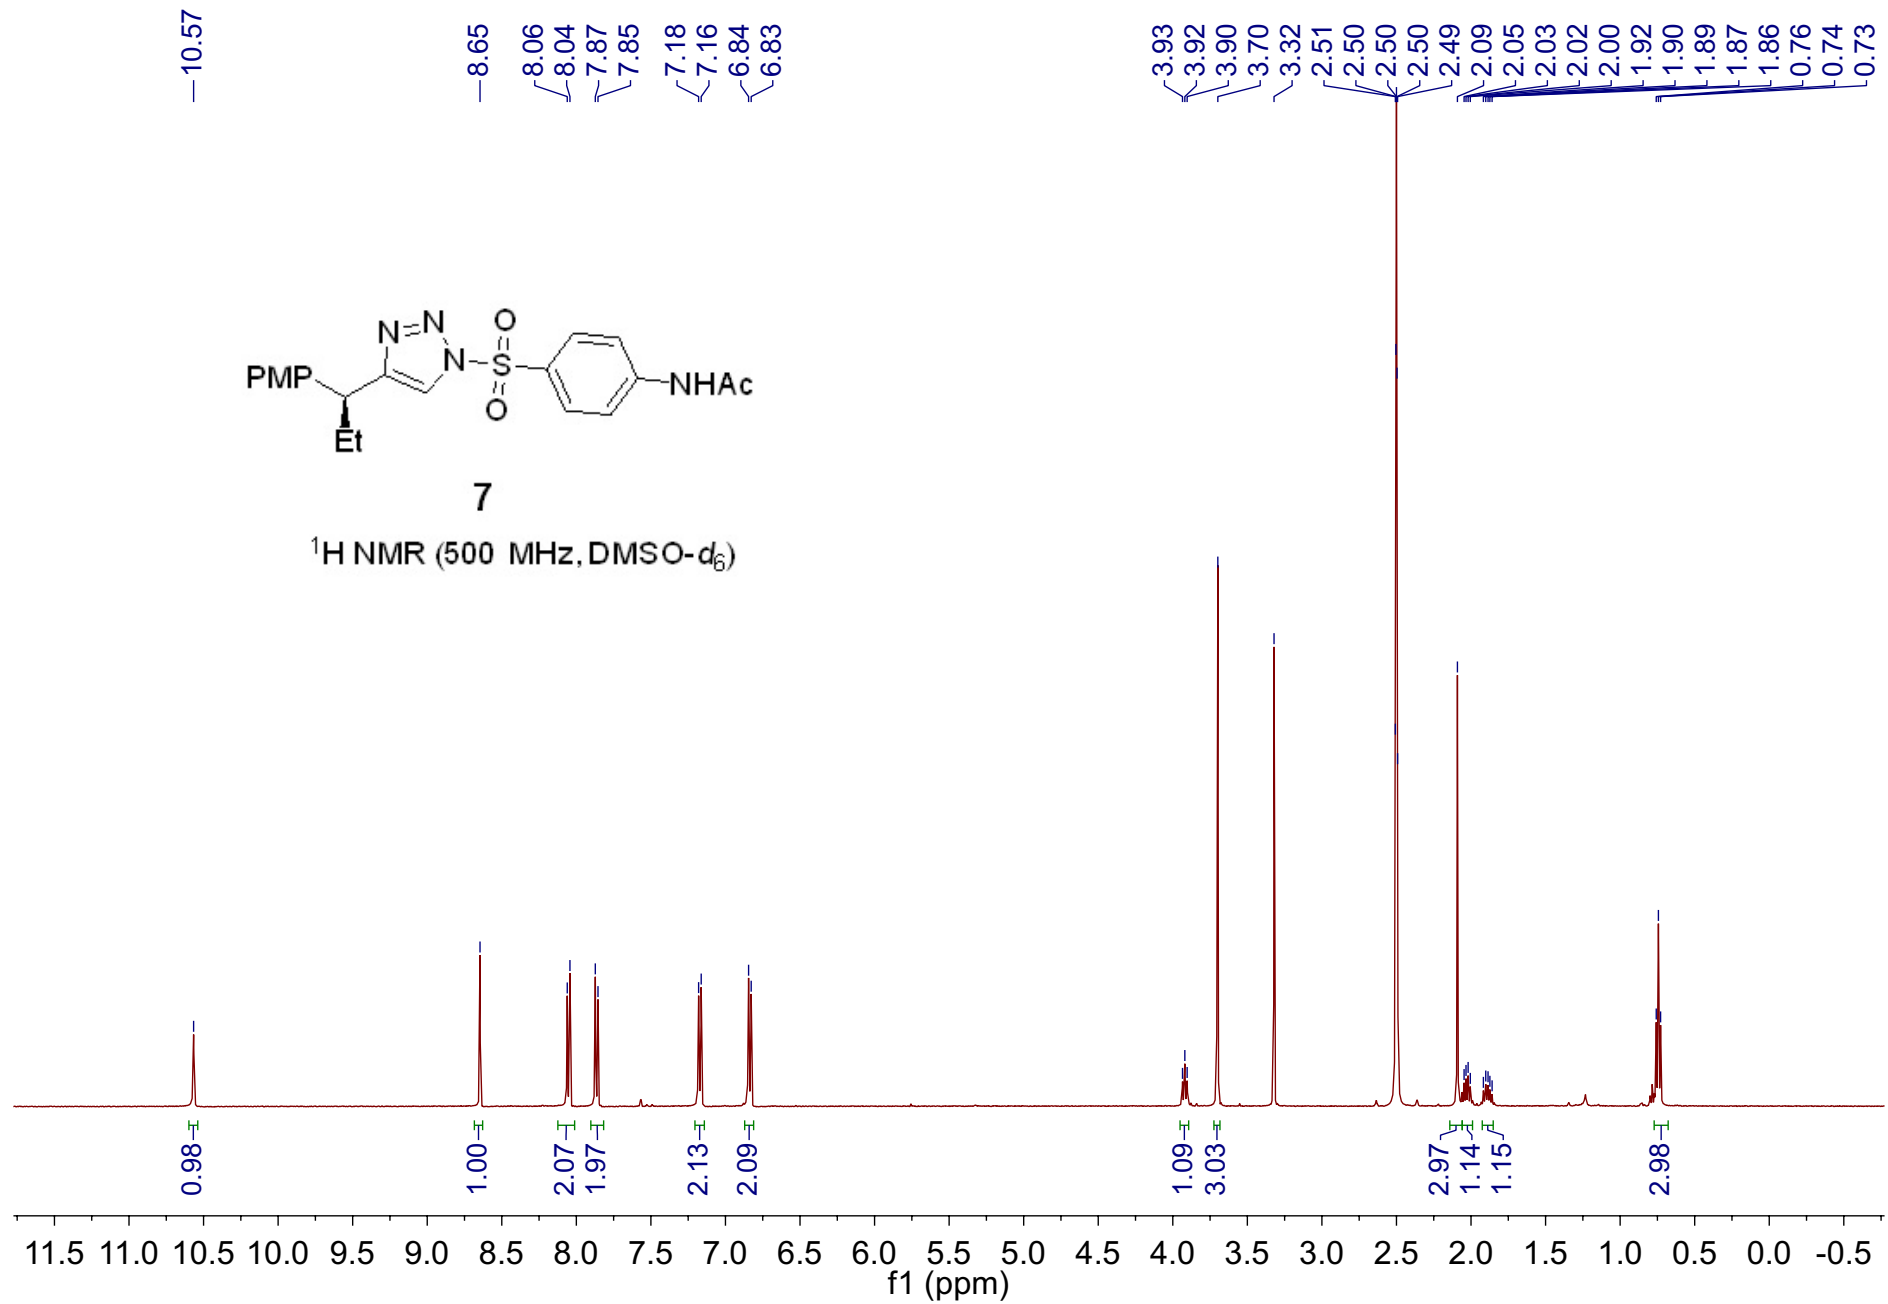

Supplementary Fig. 186. <sup>1</sup>H NMR (500 MHz, DMSO-d<sub>6</sub>) spectra for compound 7

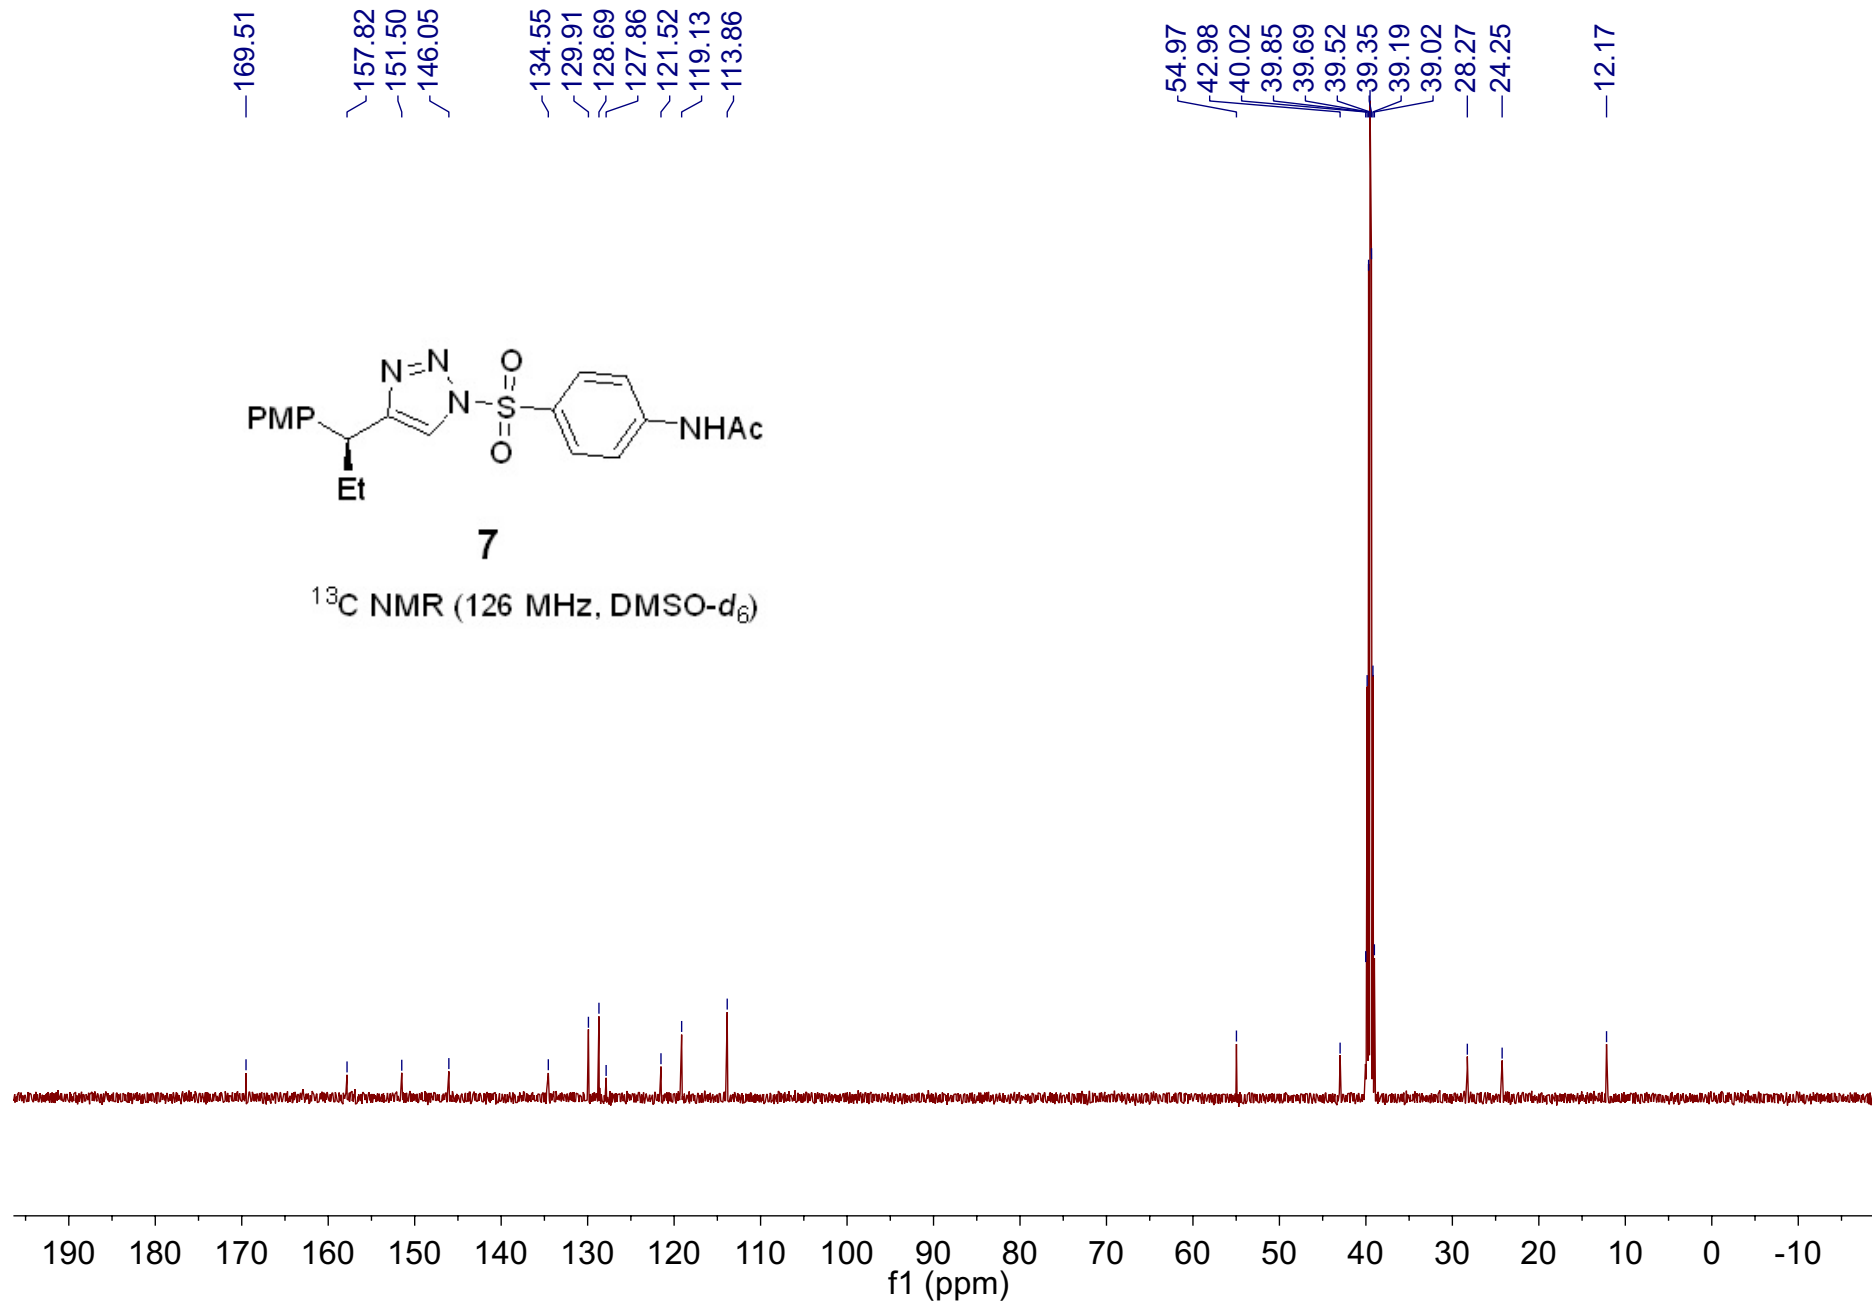

Supplementary Fig. 187.  $^{13}\text{C}$  NMR (126 MHz,  $\text{DMSO-}d_6$ ) spectra for compound 7

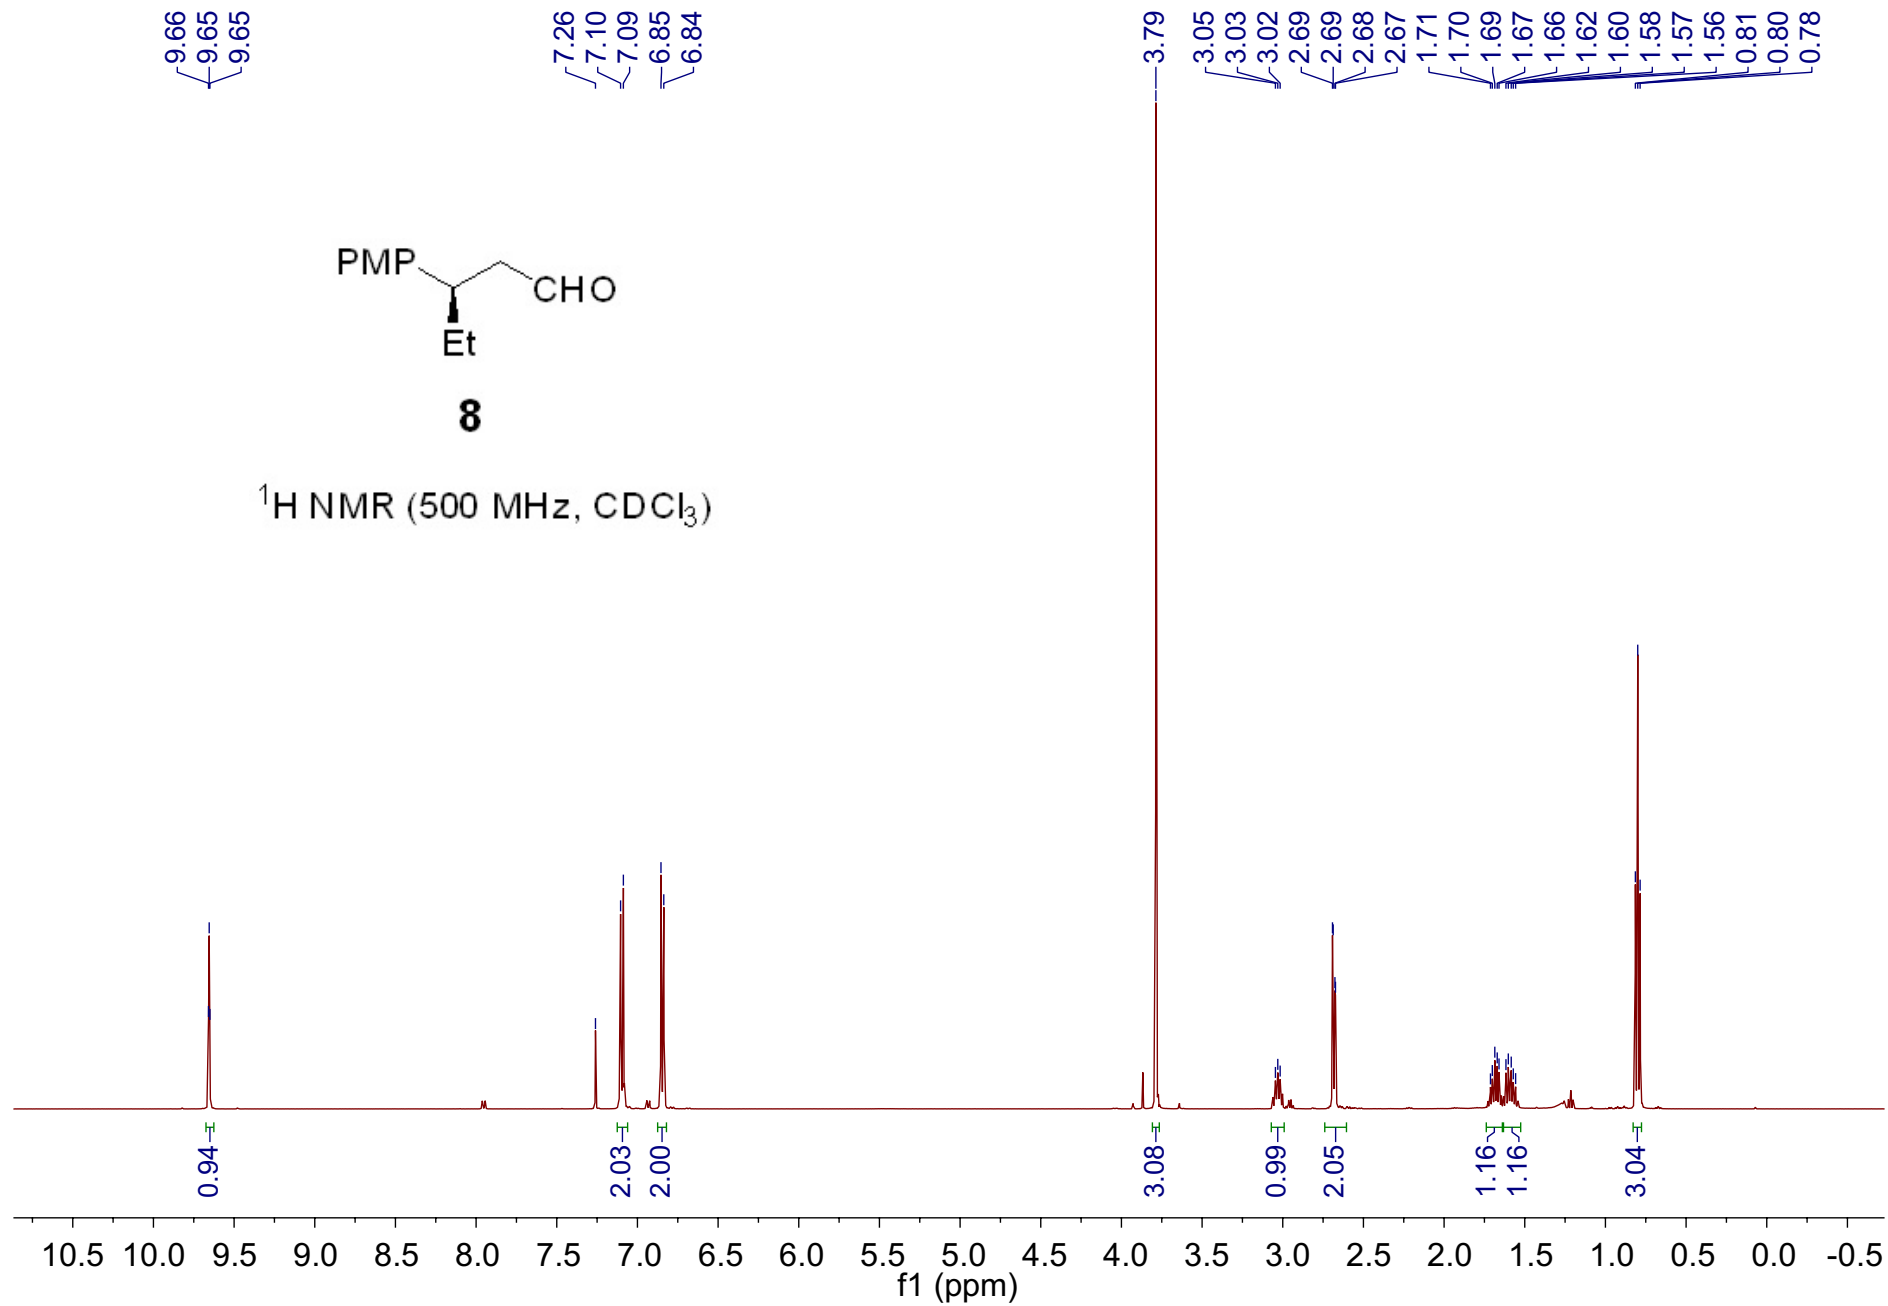

Supplementary Fig. 188. <sup>1</sup>H NMR (500 MHz, CDCl<sub>3</sub>) spectra for compound **8**



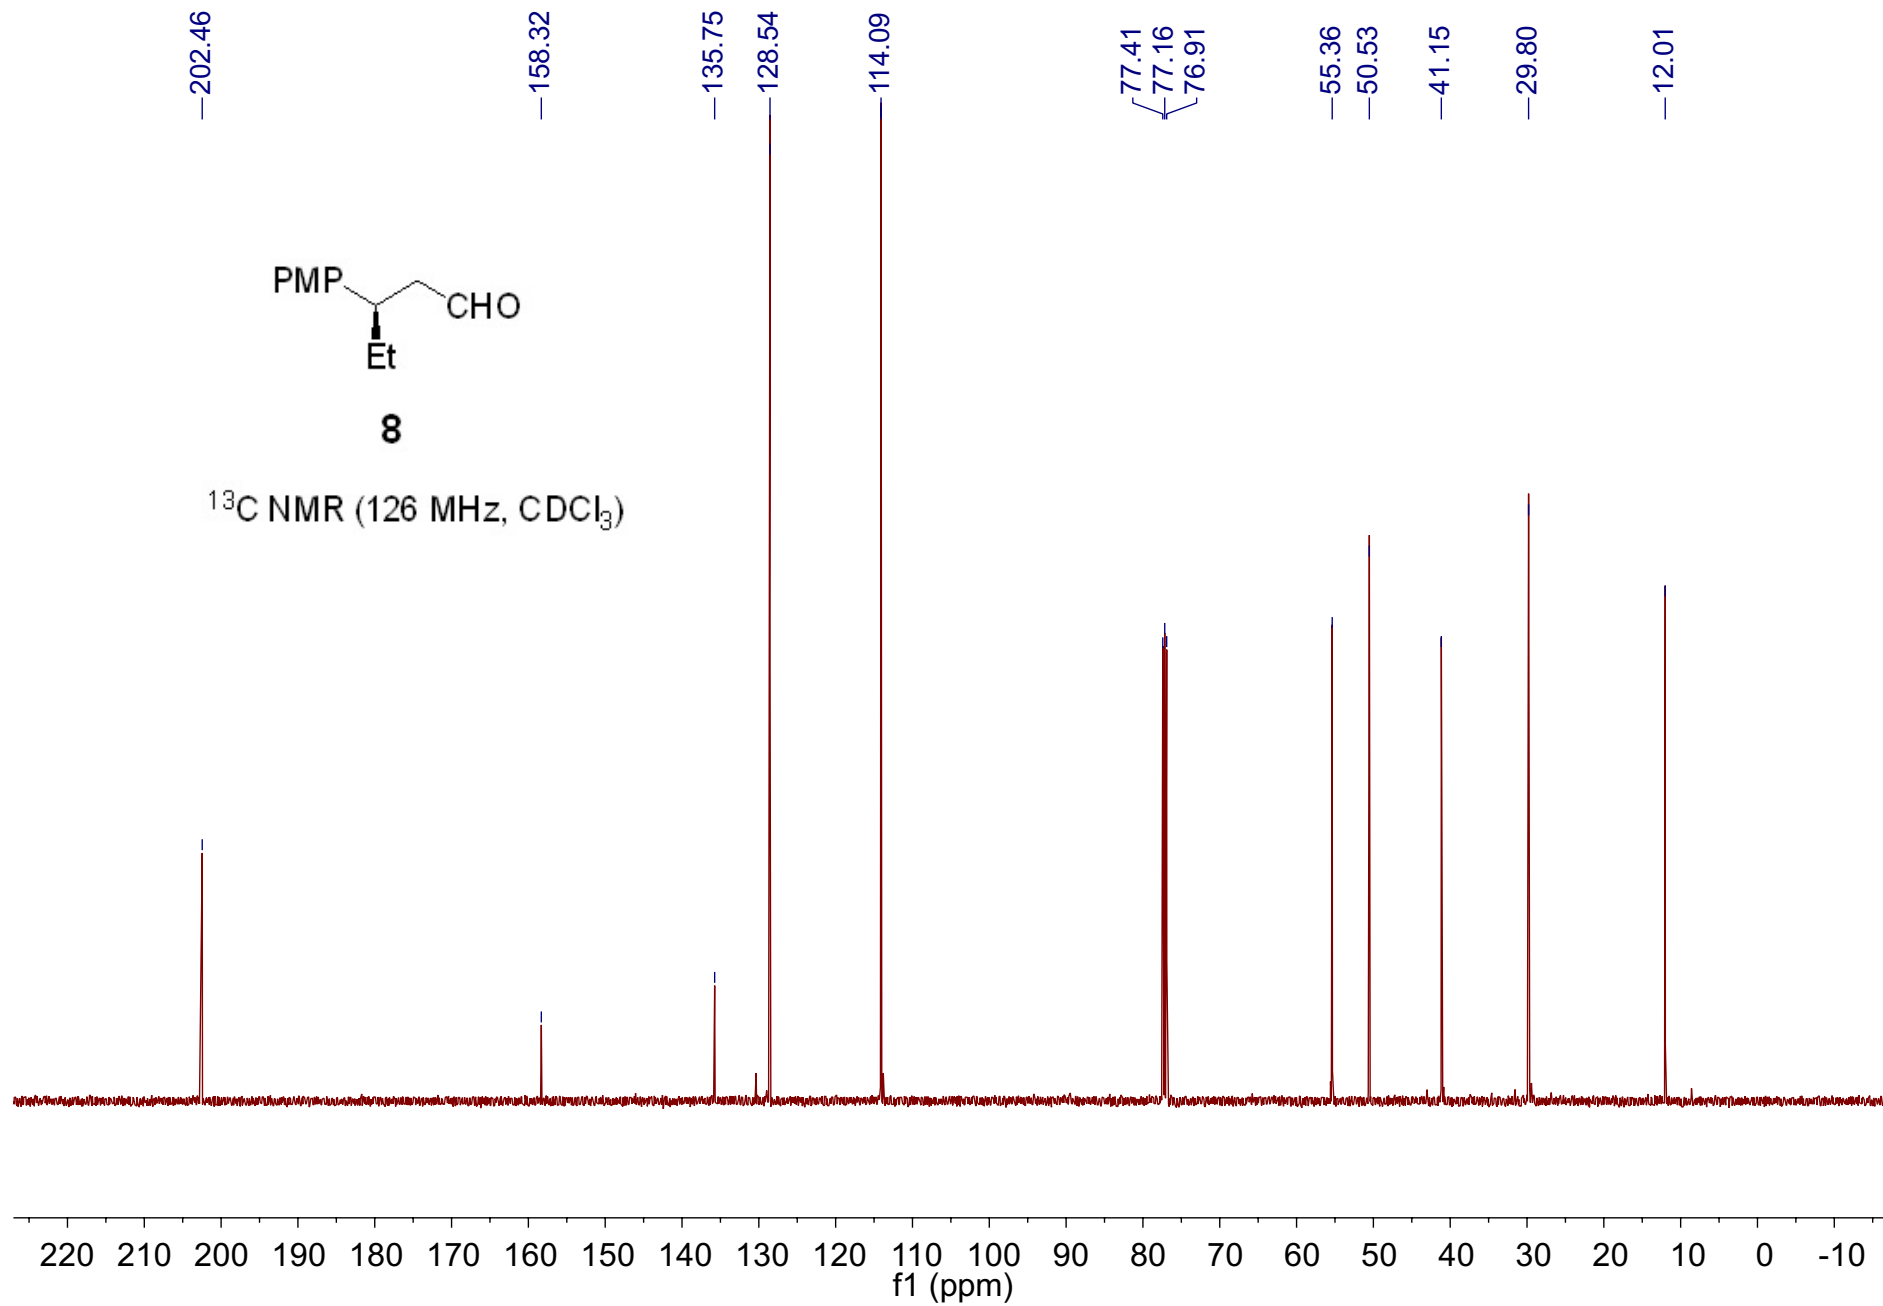

Supplementary Fig. 189.  $^{13}\text{C}$  NMR (126 MHz,  $\text{CDCl}_3$ ) spectra for compound **8**

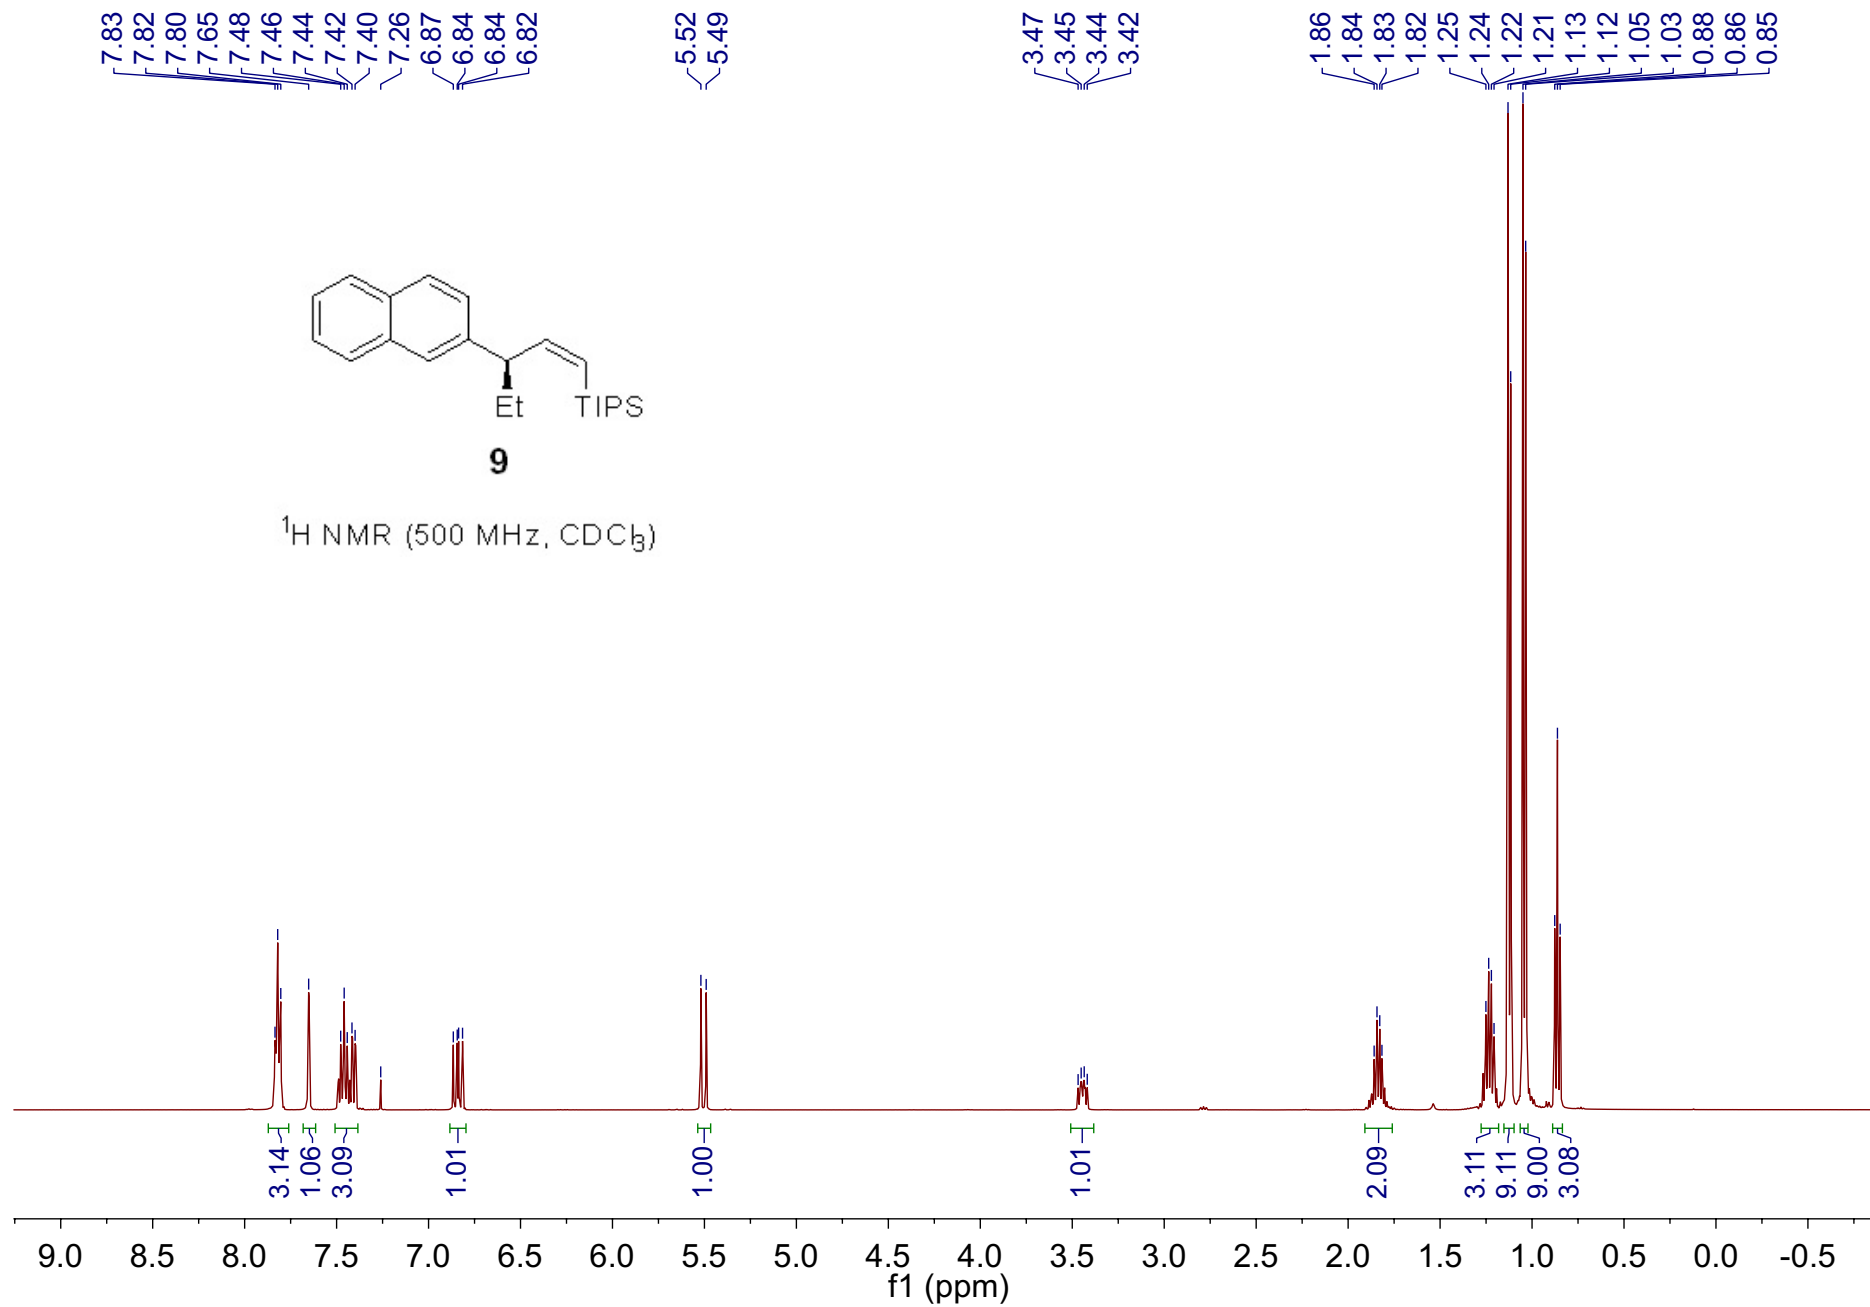

Supplementary Fig. 190. <sup>1</sup>H NMR (500 MHz, CDCl<sub>3</sub>) spectra for compound **9**

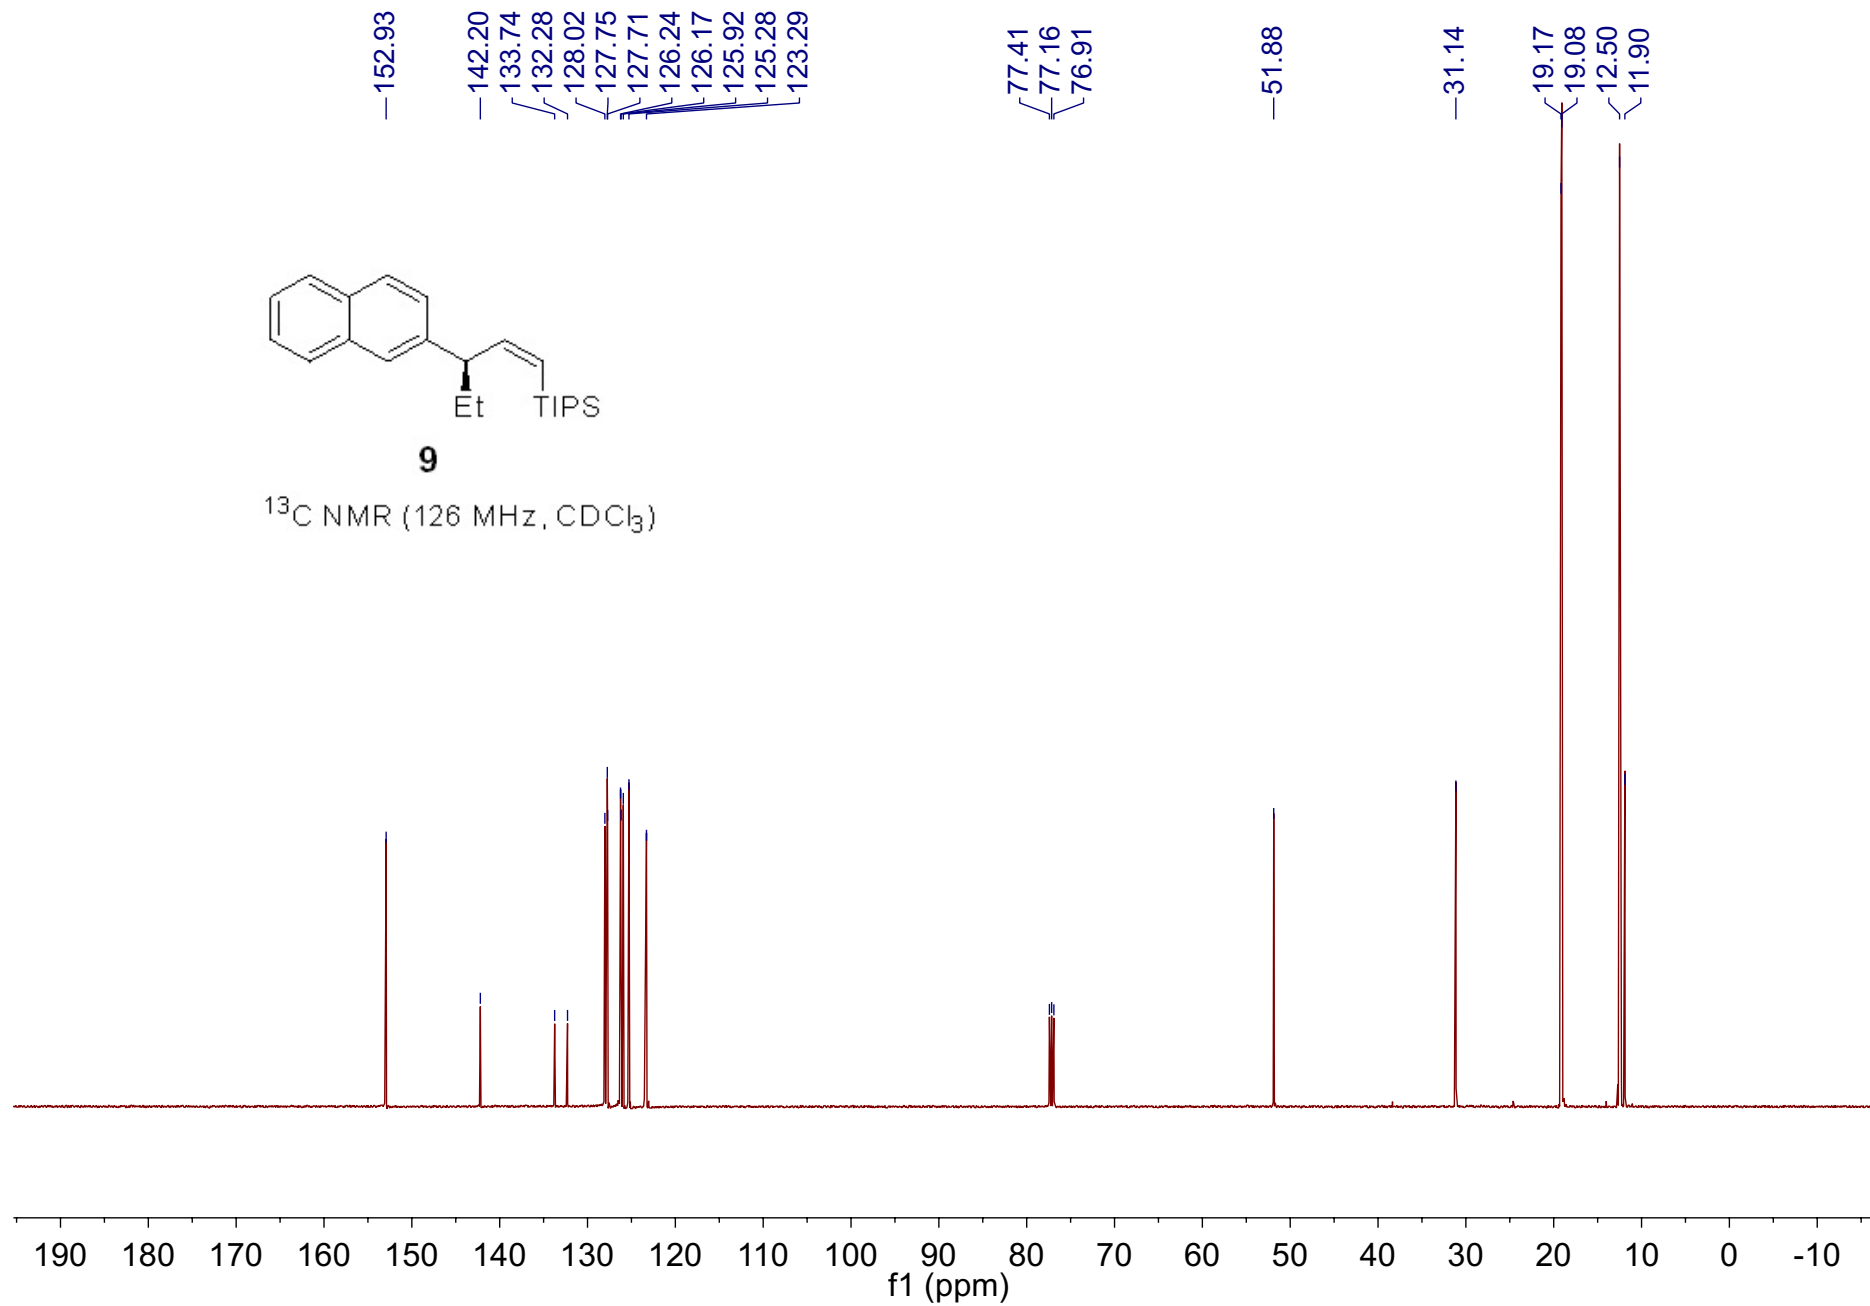

**Supplementary Fig. 191.** <sup>13</sup>C NMR (126 MHz, CDCl<sub>3</sub>) spectra for compound **9**

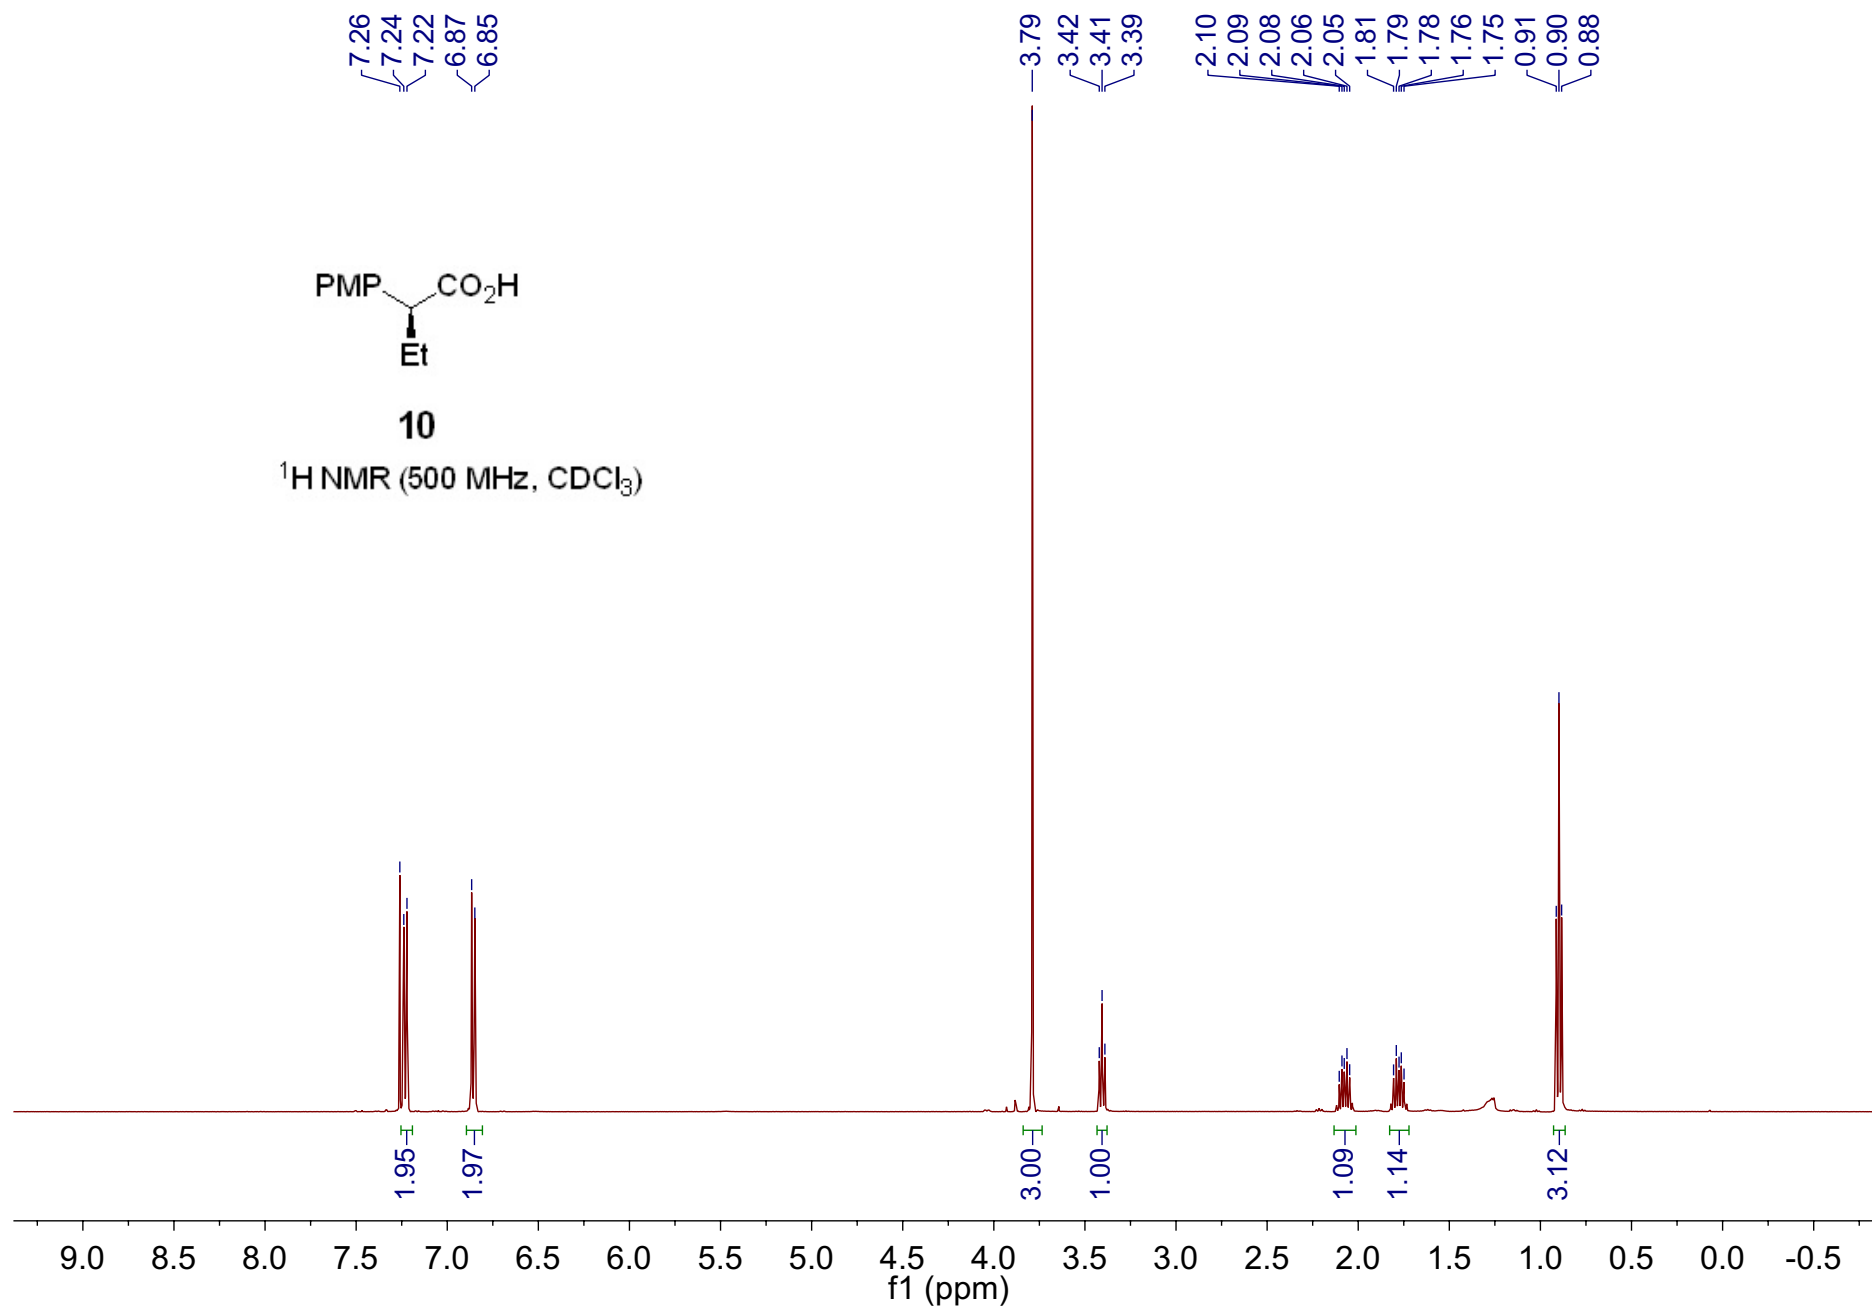

**Supplementary Fig. 192.** <sup>1</sup>H NMR (500 MHz, CDCl<sub>3</sub>) spectra for compound **10**

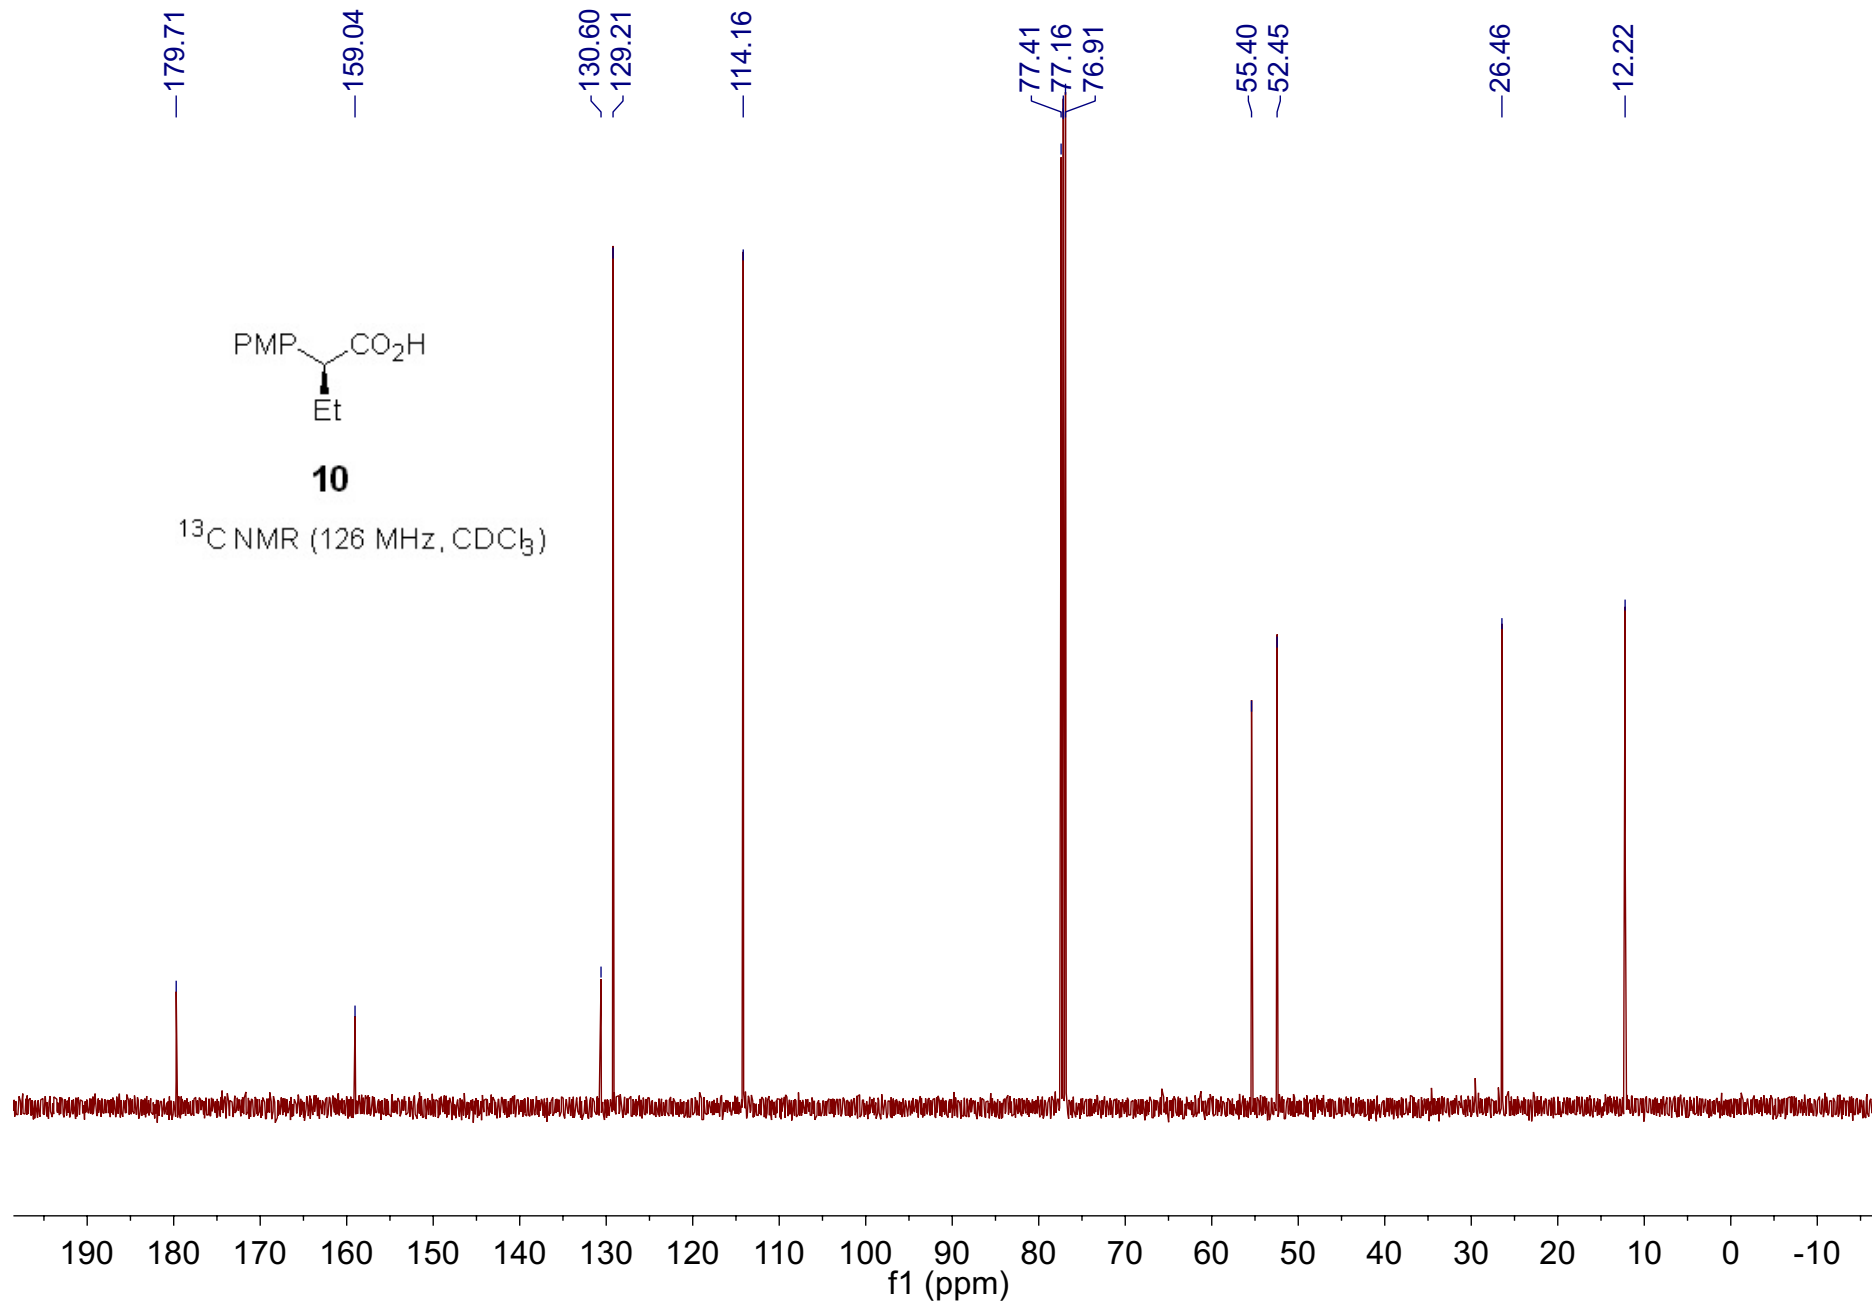

Supplementary Fig. 193. <sup>13</sup>C NMR (126 MHz, CDCl<sub>3</sub>) spectra for compound **10**

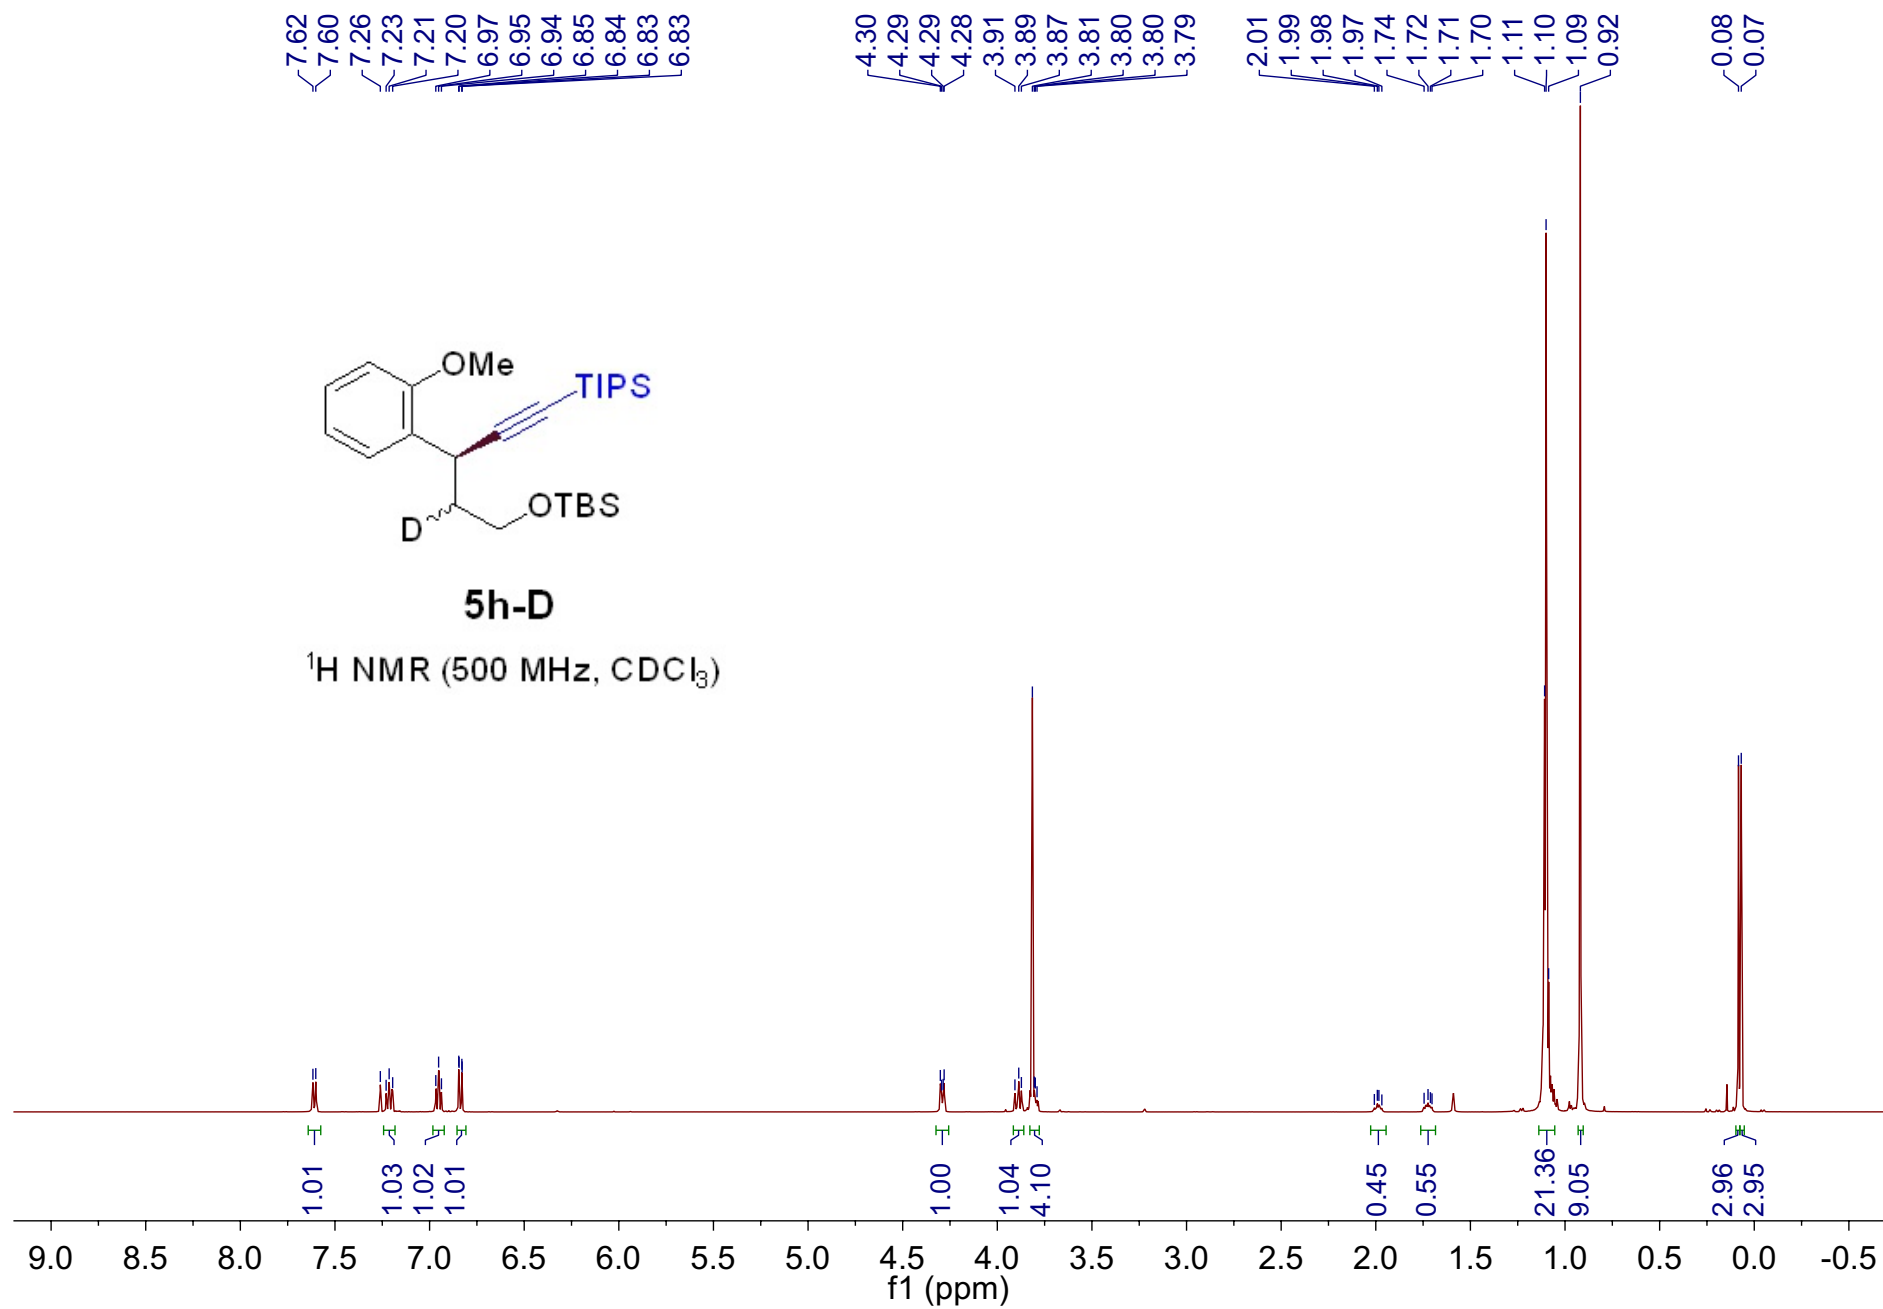

Supplementary Fig. 194. <sup>1</sup>H NMR (500 MHz, CDCl<sub>3</sub>) spectra for compound **5h-D**

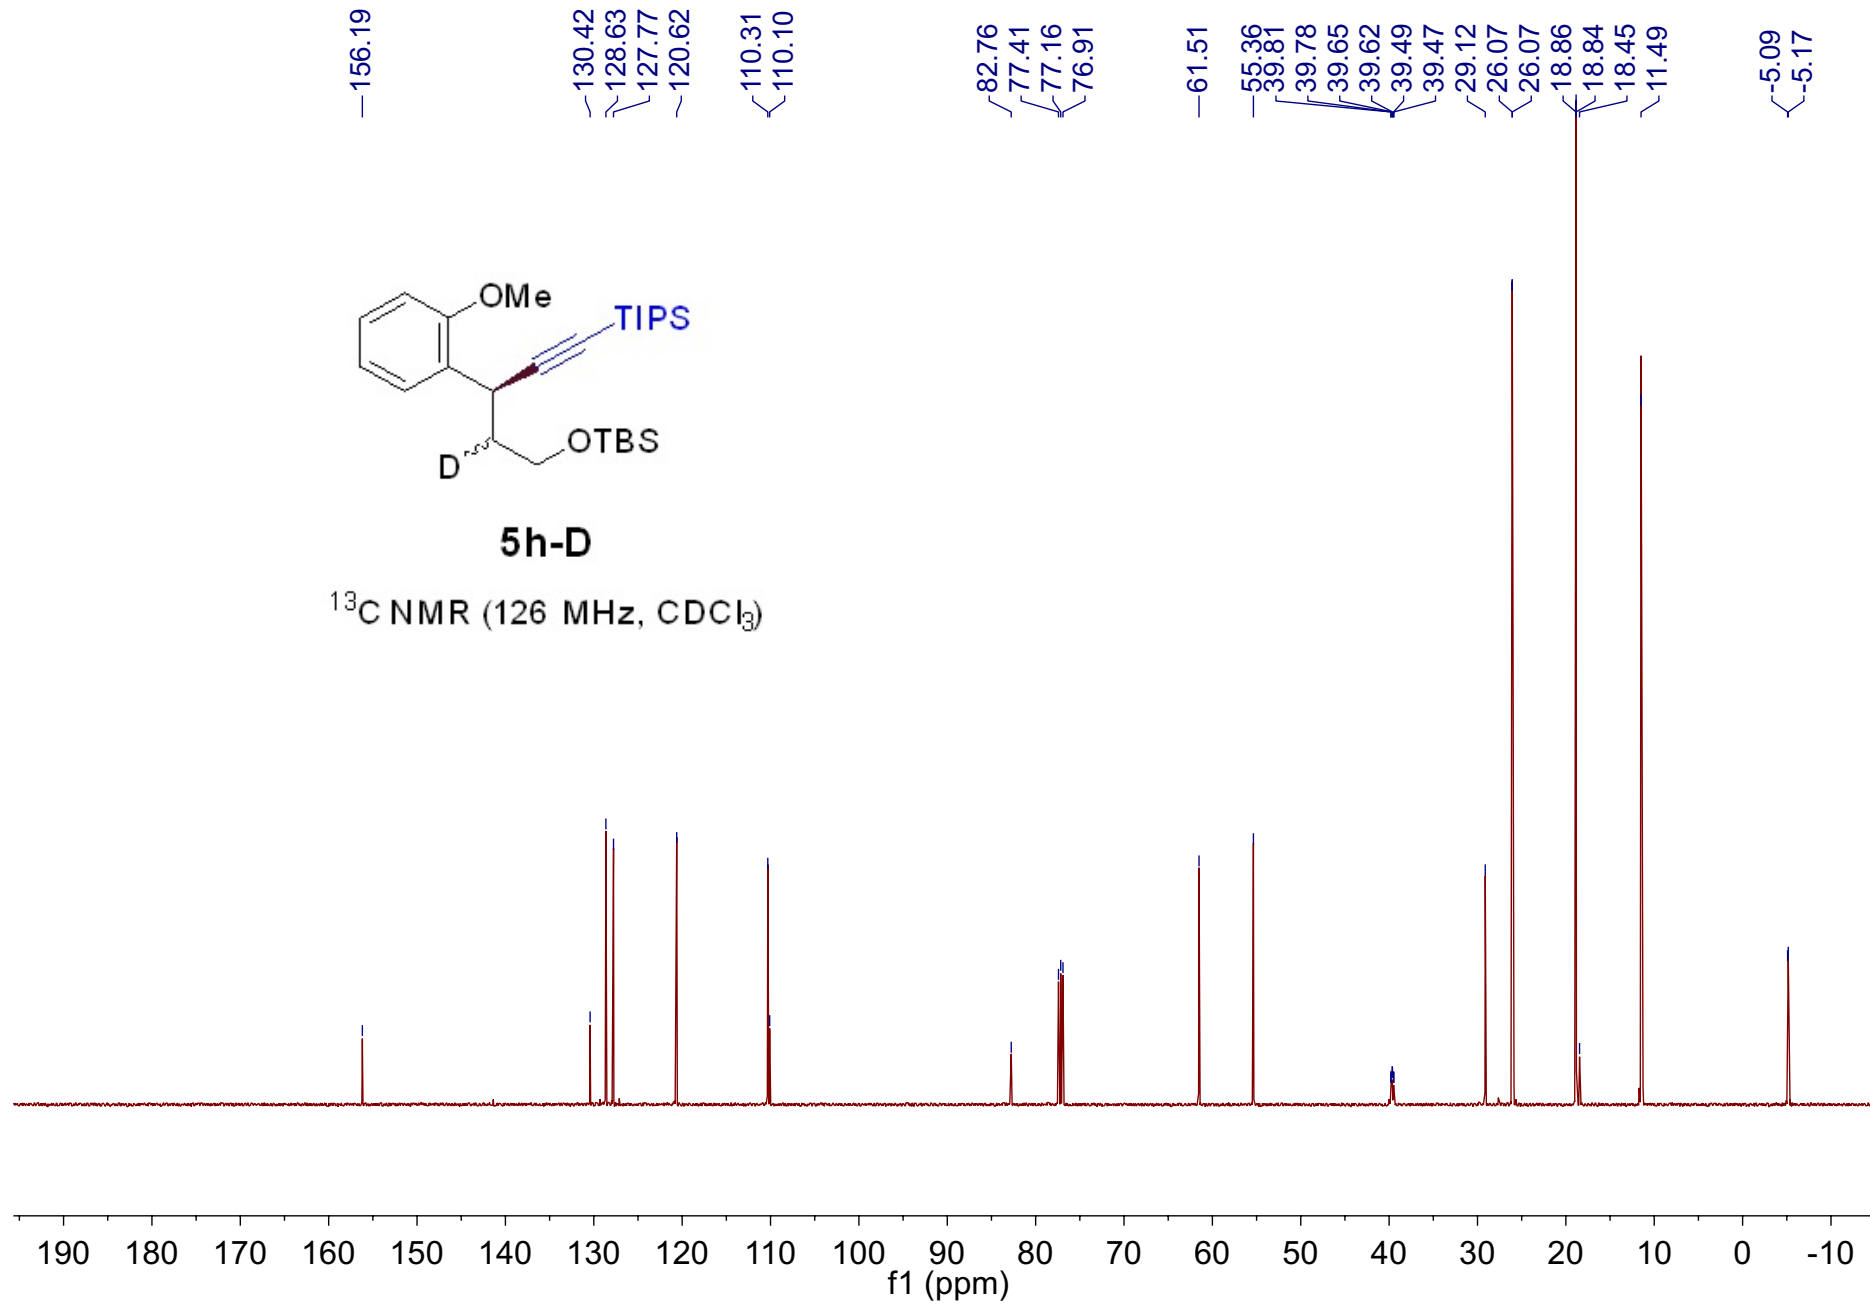

Supplementary Fig. 195.  $^{13}\text{C}$  NMR (126 MHz,  $\text{CDCl}_3$ ) spectra for compound **5h-D**

—7.26

—2.00

—1.74

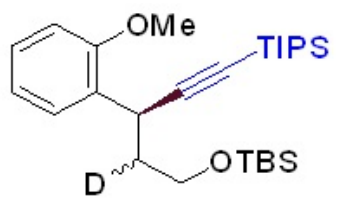

**5h-D**

$^2\text{H}$  NMR (92 MHz,  $\text{CDCl}_3$ )

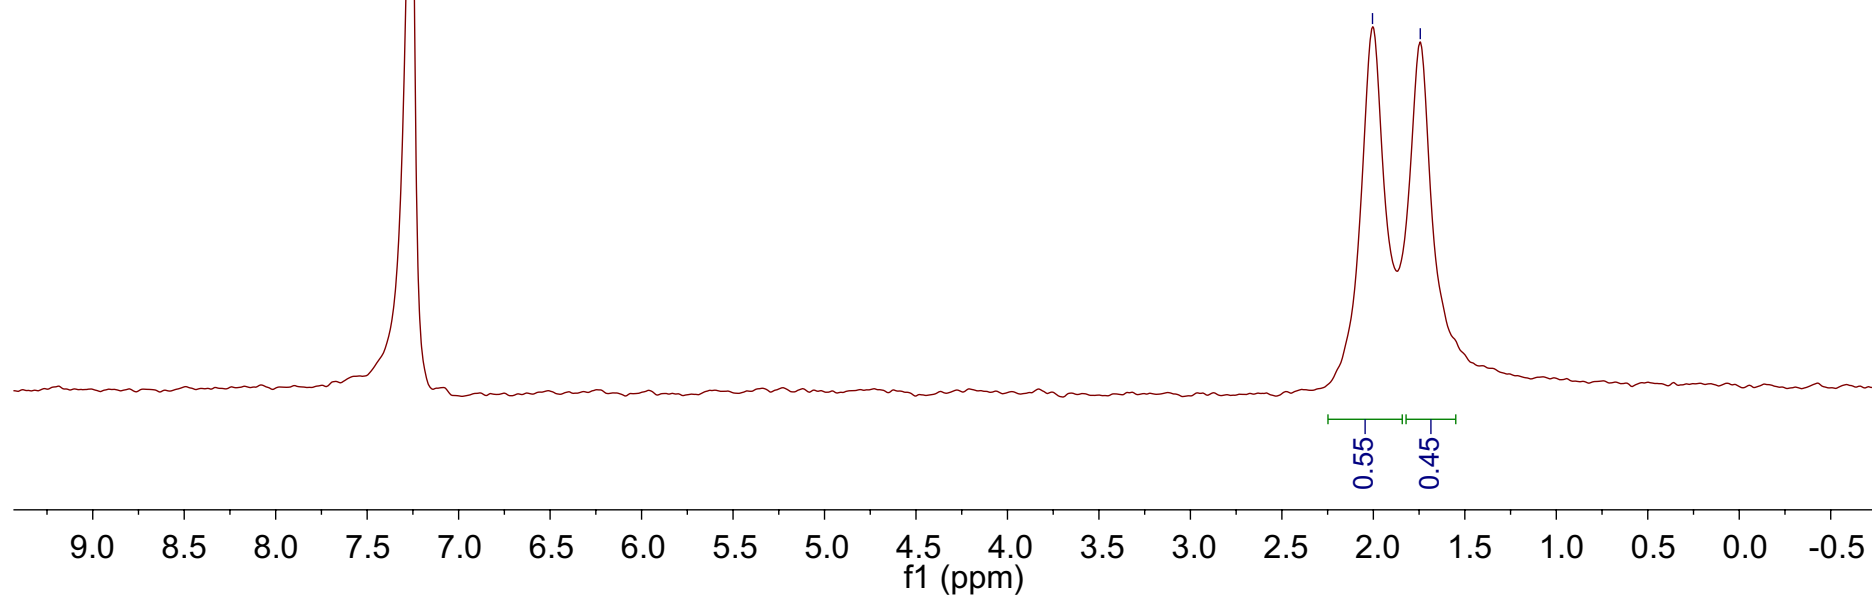

**Supplementary Fig. 196.**  $^2\text{H}$  NMR (92 MHz,  $\text{CDCl}_3$ ) spectra for compound **5h-D**



—7.26

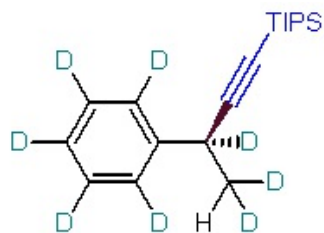

**5n'-D**

<sup>1</sup>H NMR (500MHz, CDCl<sub>3</sub>)

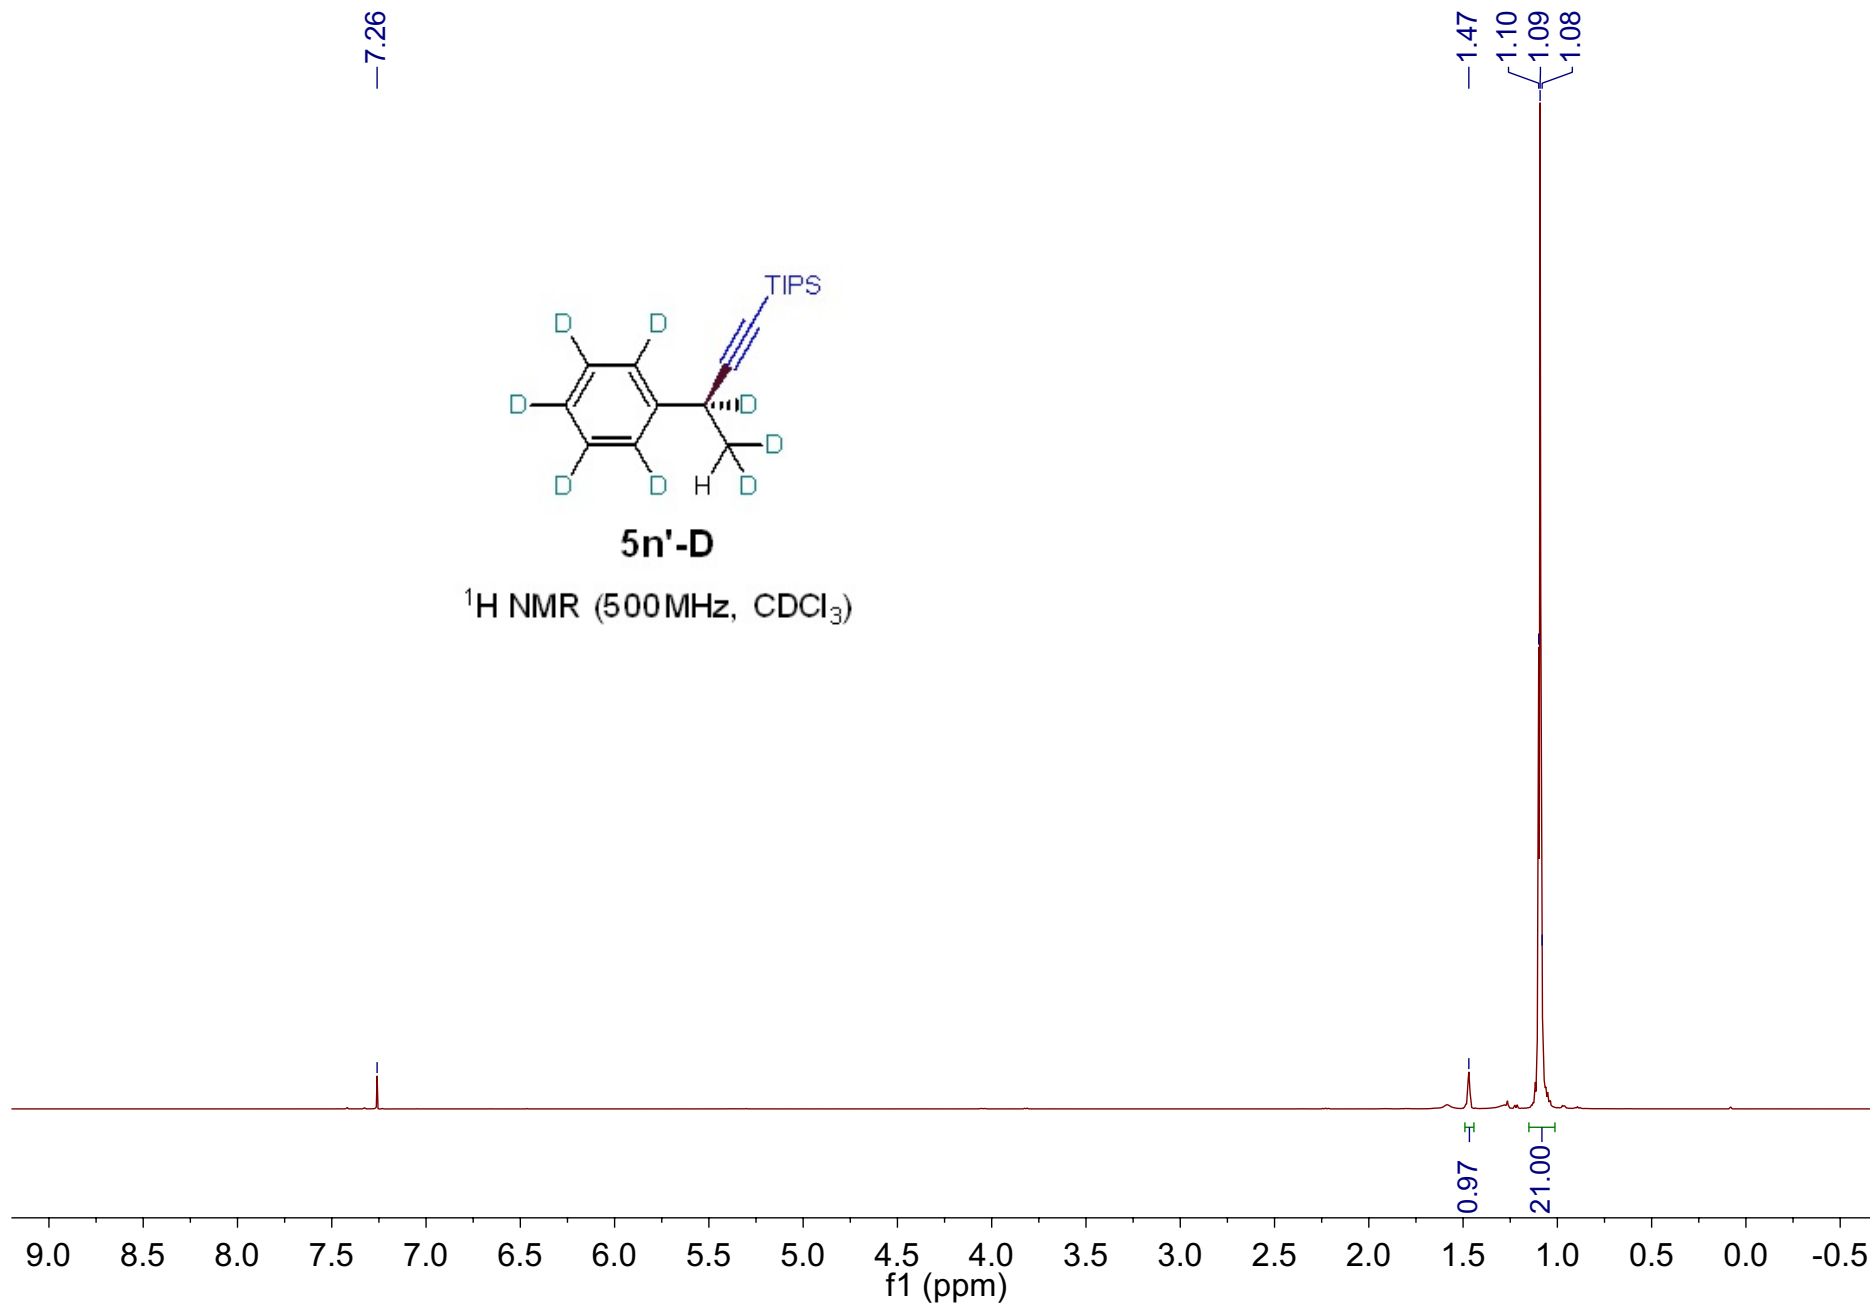

**Supplementary Fig. 197.** <sup>1</sup>H NMR (500 MHz, CDCl<sub>3</sub>) spectra for compound **5n'-D**

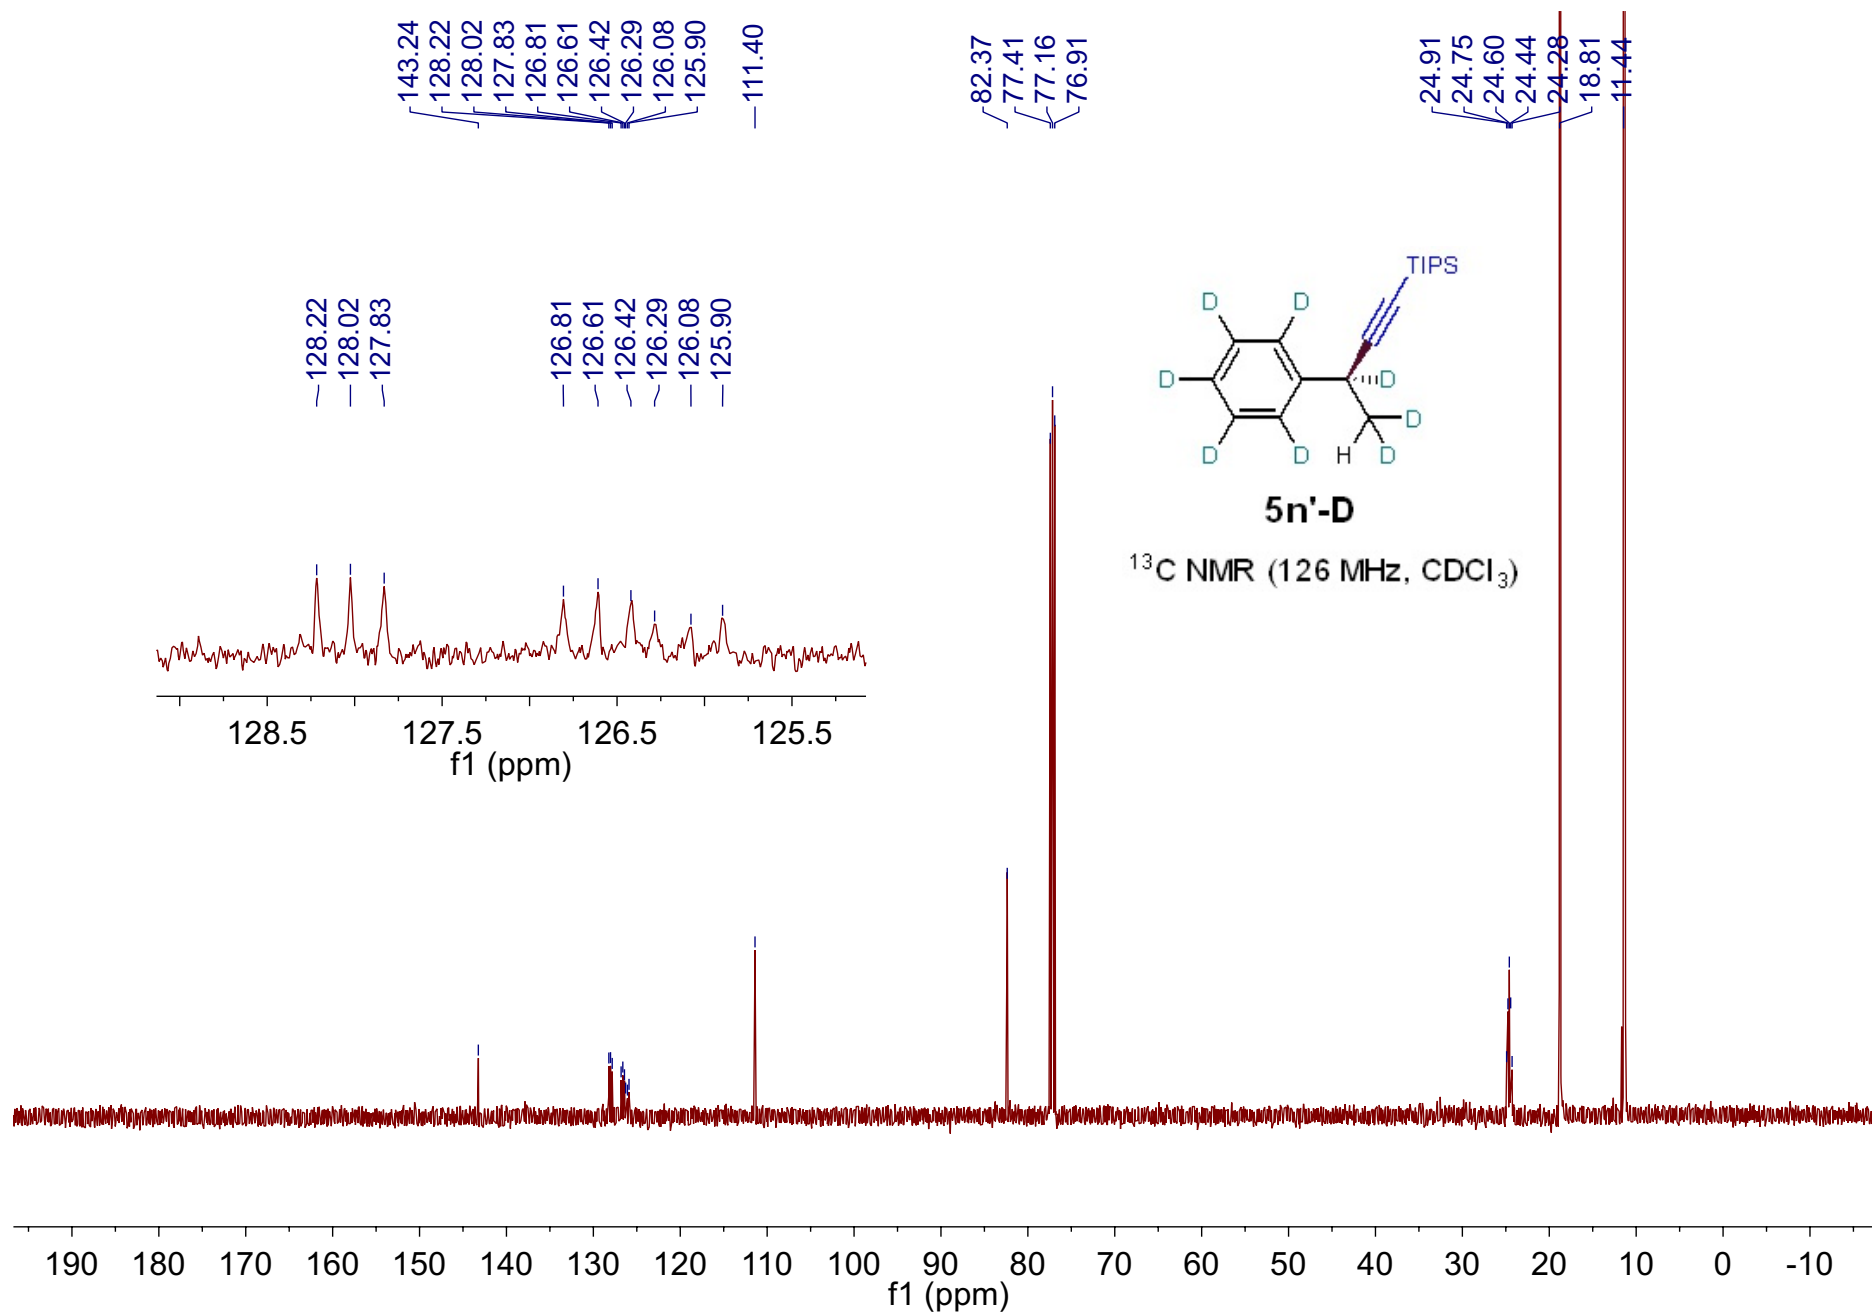

**Supplementary Fig. 198.** <sup>13</sup>C NMR (126 MHz, CDCl<sub>3</sub>) spectra for compound **5n'-D**

7.46  
7.36  
7.26

3.79

1.48

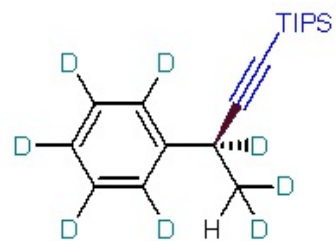

**5n'-D**

<sup>2</sup>H NMR (92 MHz, CDCl<sub>3</sub>)

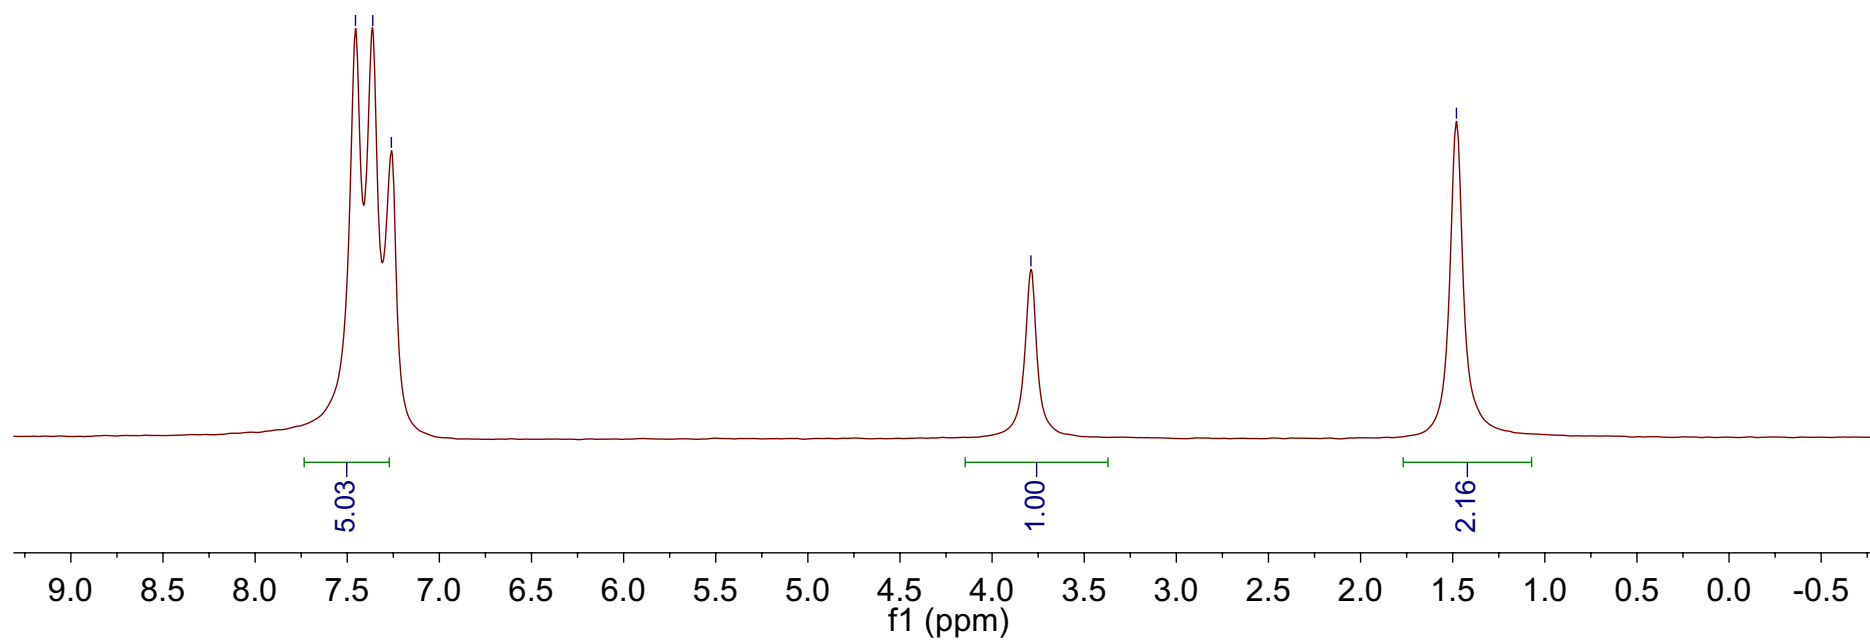

**Supplementary Fig. 199.** <sup>2</sup>H NMR (92 MHz, CDCl<sub>3</sub>) spectra for compound **5n'-D**

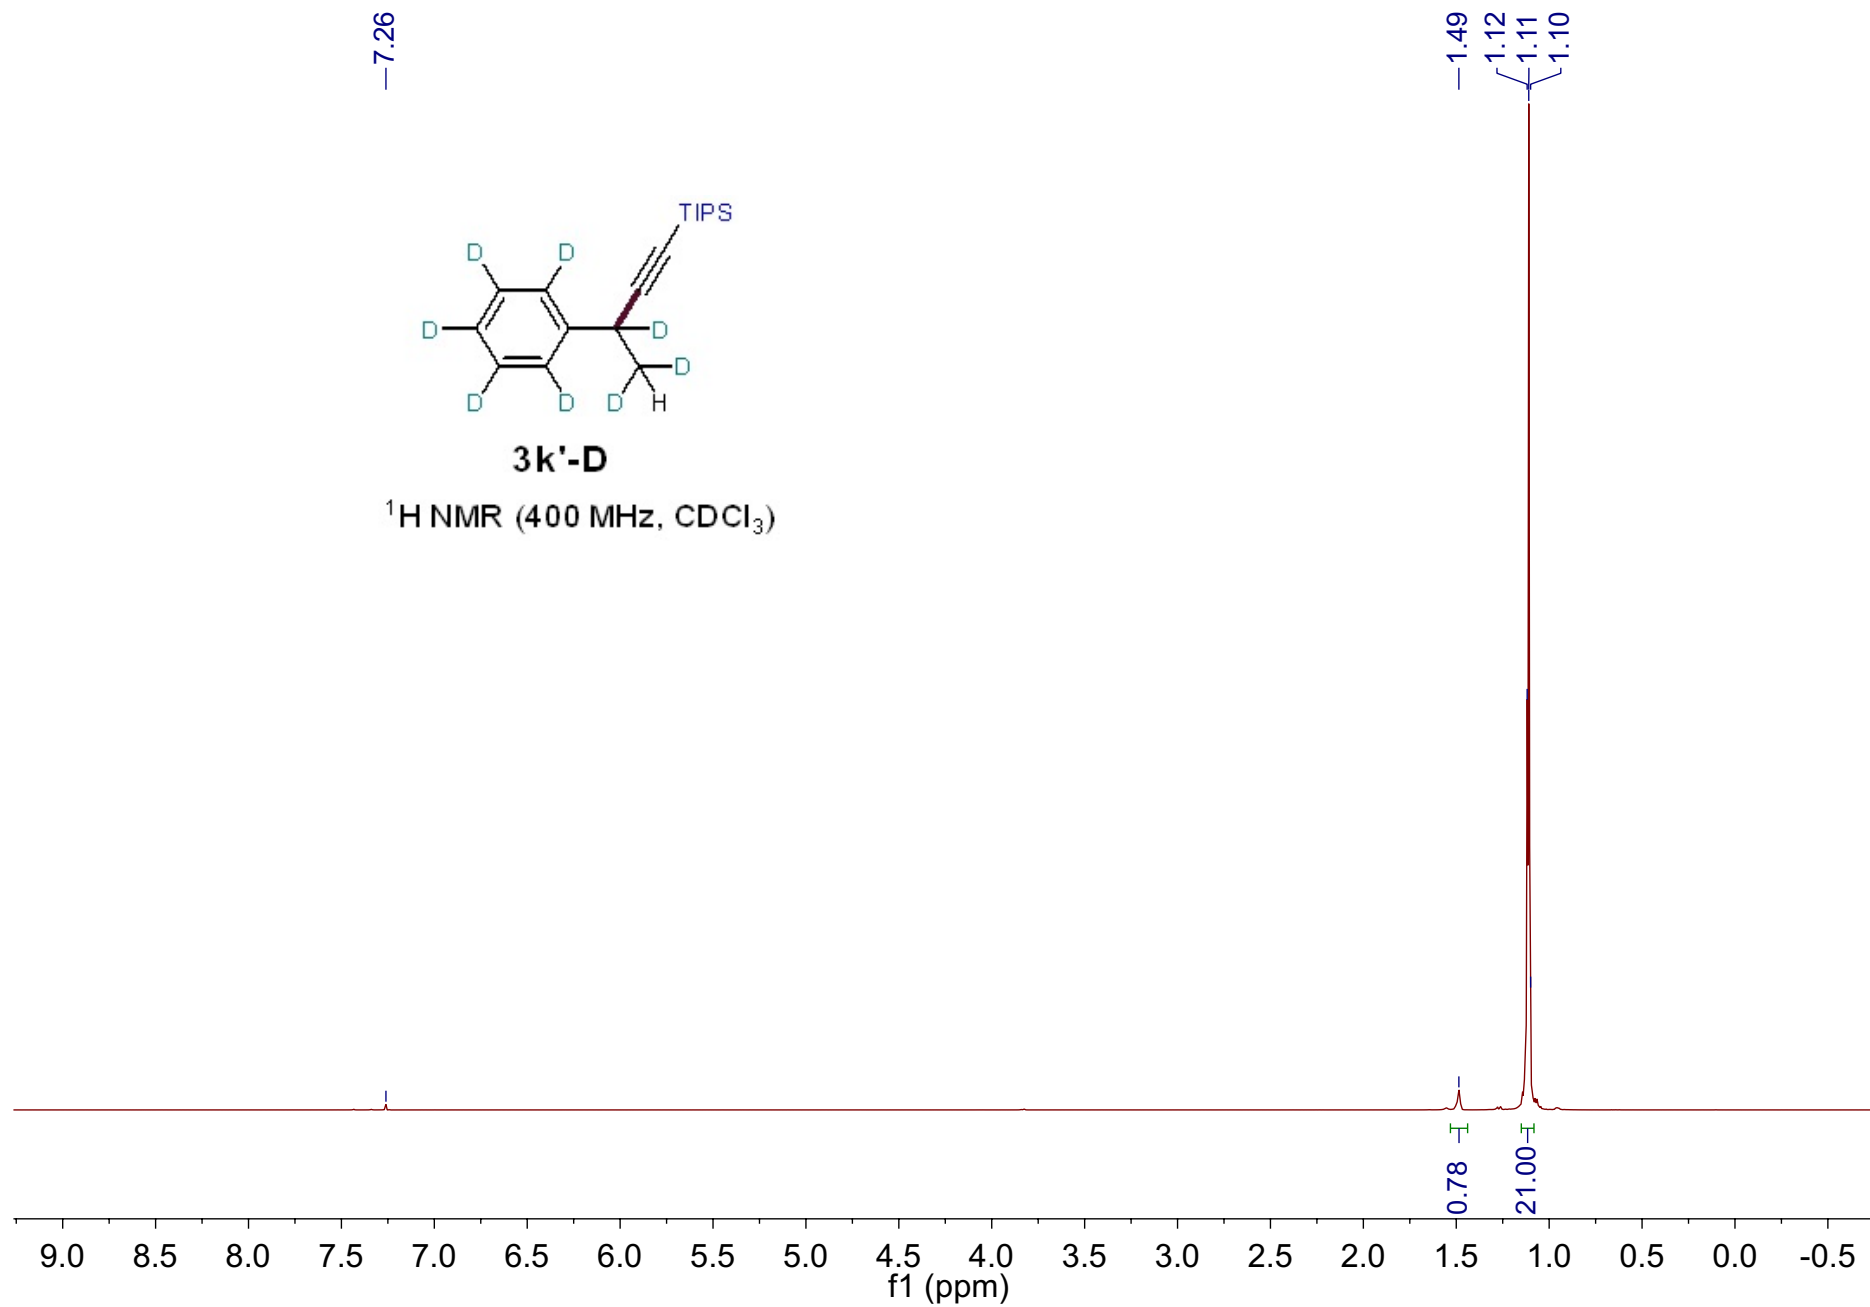

Supplementary Fig. 200.  $^1\text{H}$  NMR (400 MHz,  $\text{CDCl}_3$ ) spectra for compound **3k'-D**

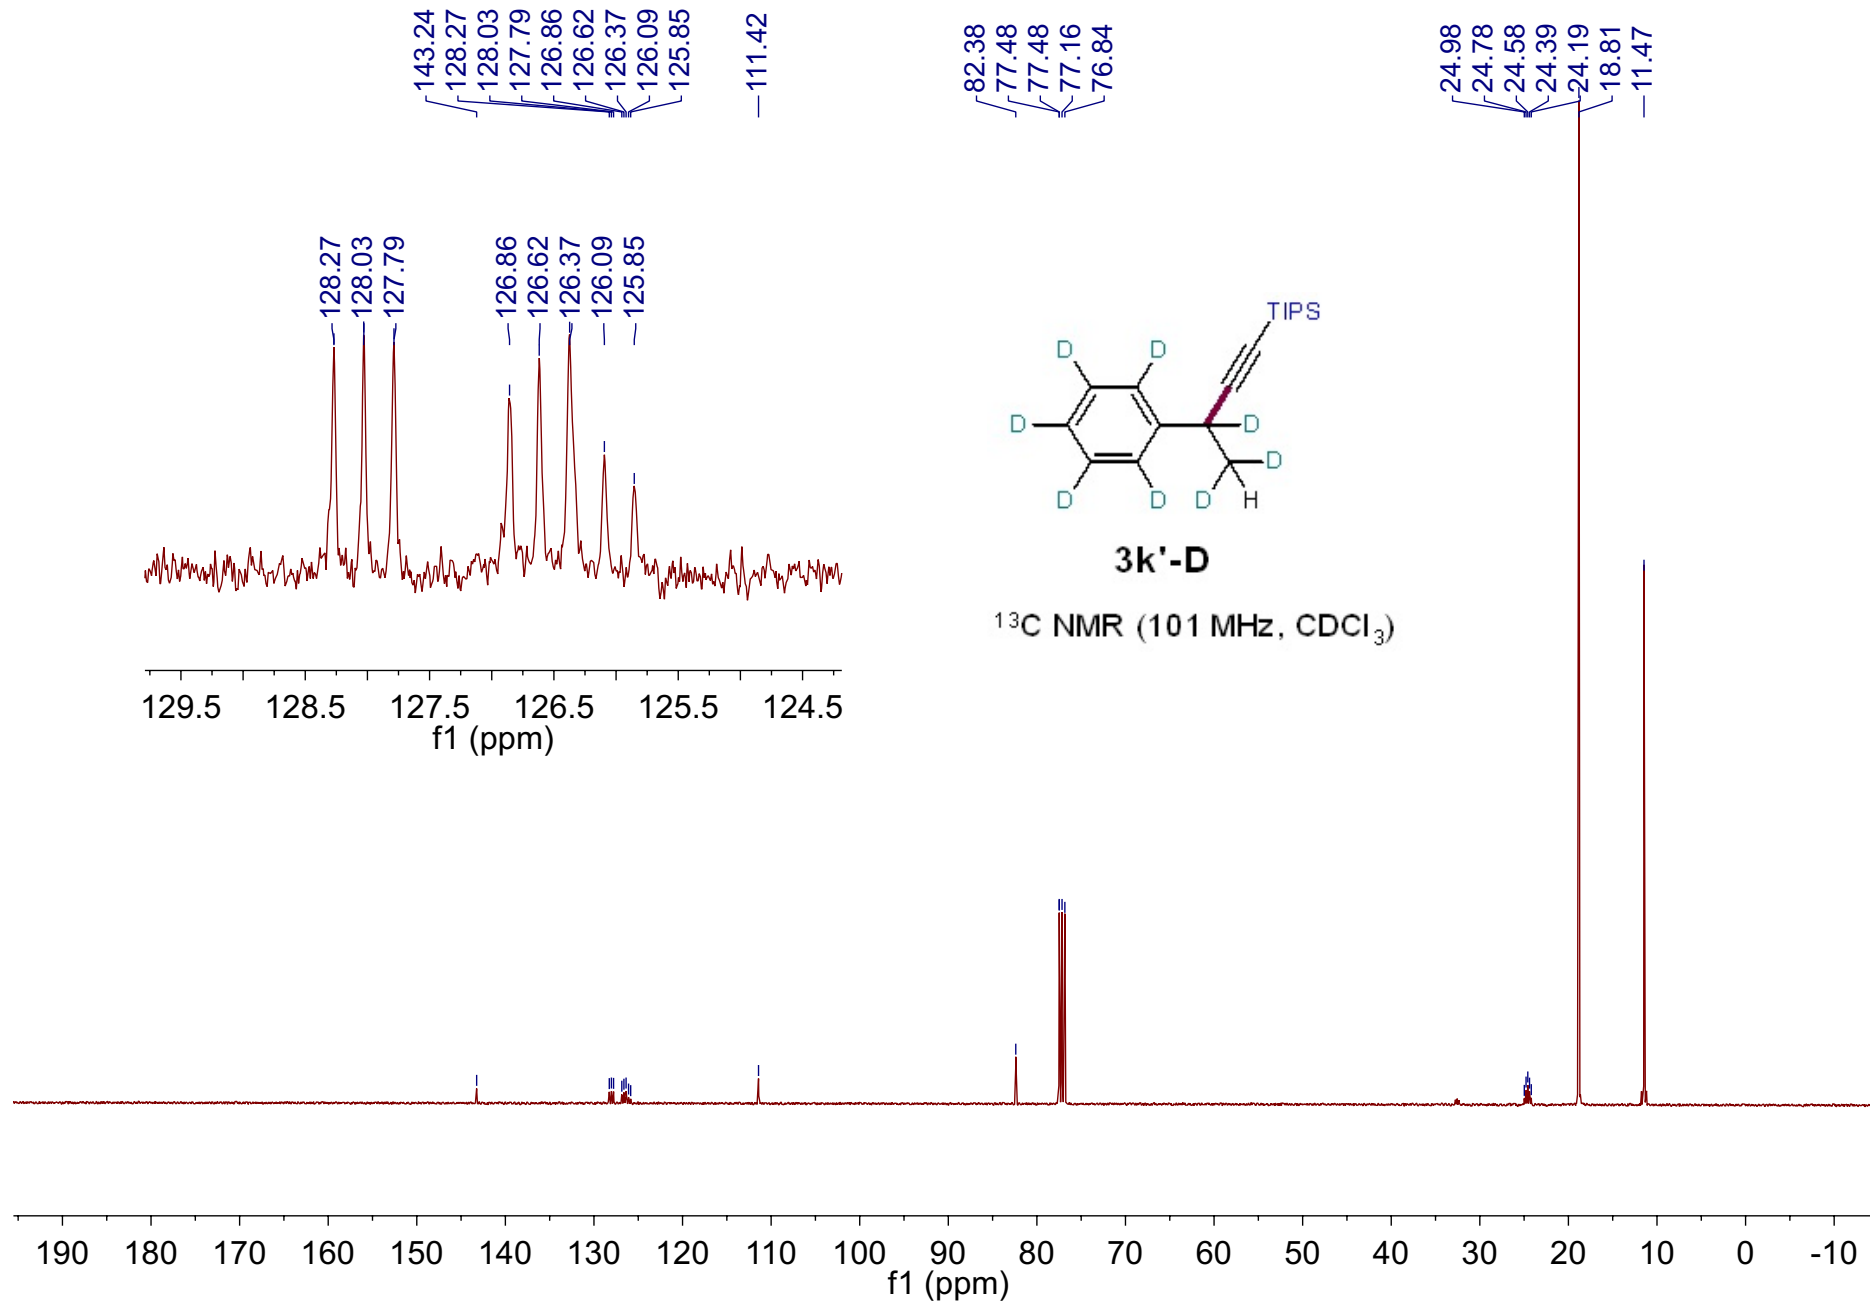

**Supplementary Fig. 201.** <sup>13</sup>C NMR (101 MHz, CDCl<sub>3</sub>) spectra for compound 3k'-D

7.44  
7.35  
7.26

3.78

1.47

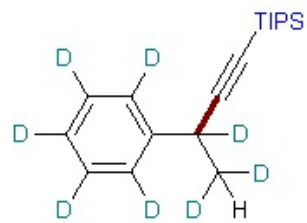

**3k'-D**

$^2\text{H}$  NMR (92 MHz,  $\text{CDCl}_3$ )

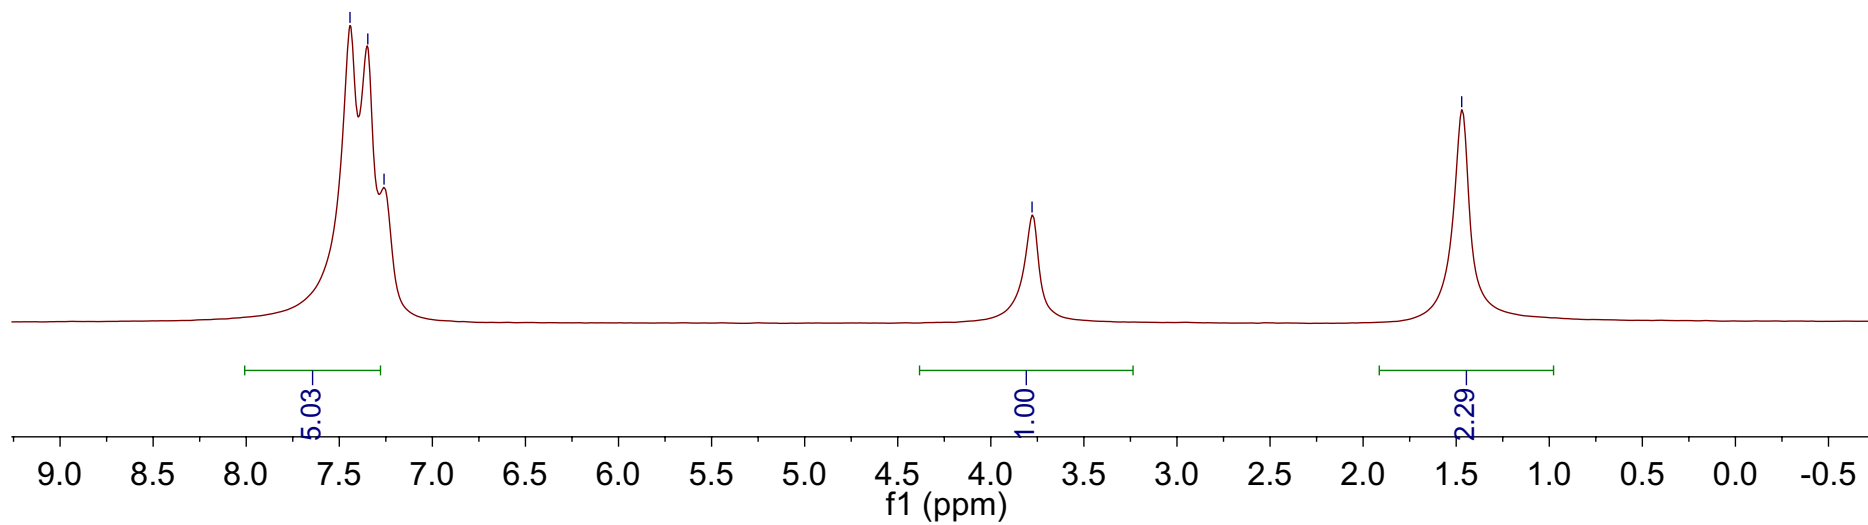

**Supplementary Fig. 202.**  $^2\text{H}$  NMR (92 MHz,  $\text{CDCl}_3$ ) spectra for compound **3k'-D**

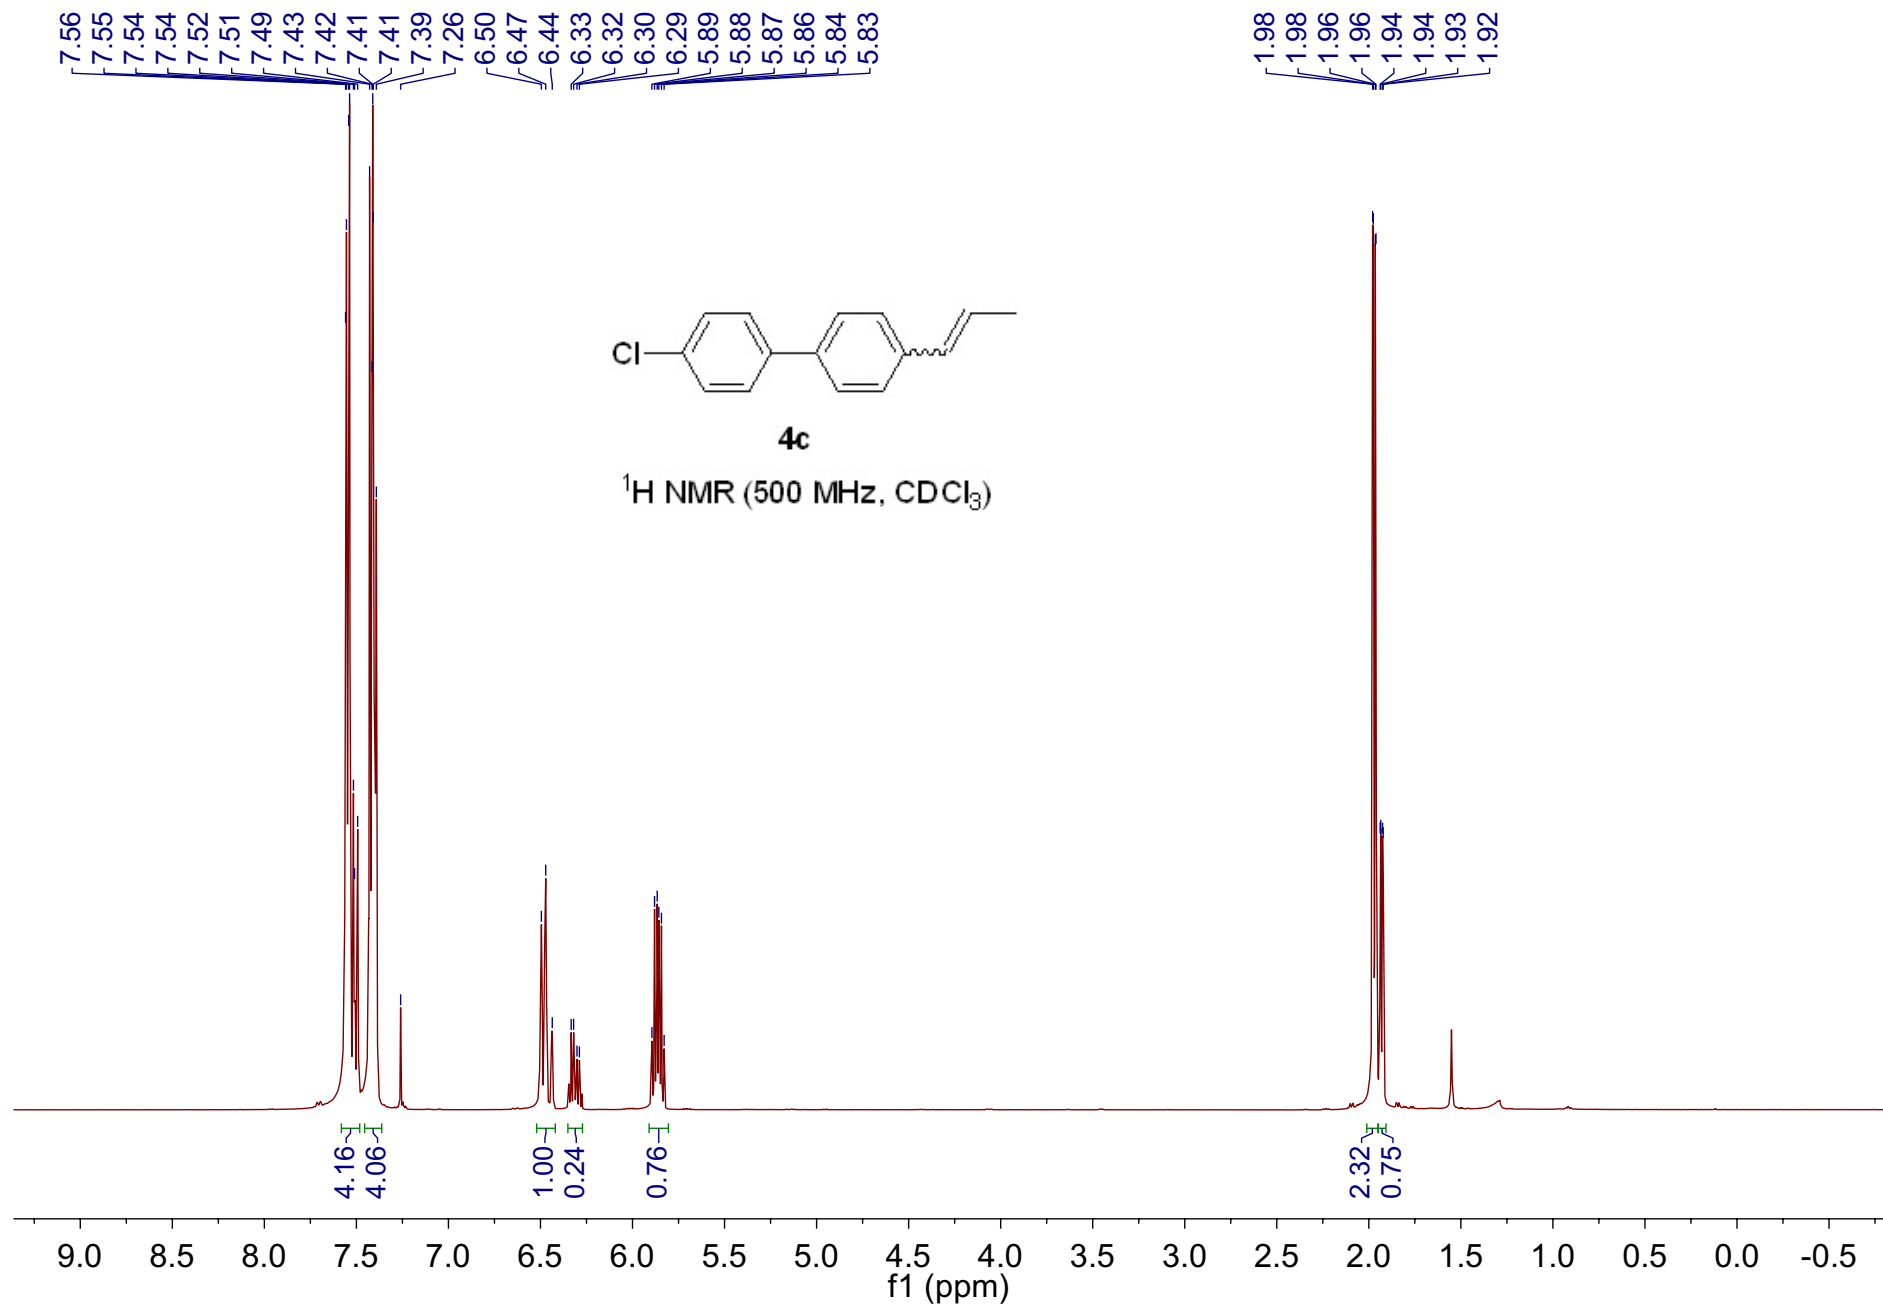

**Supplementary Fig. 203.** <sup>1</sup>H NMR (500 MHz, CDCl<sub>3</sub>) spectra for compound **4c**

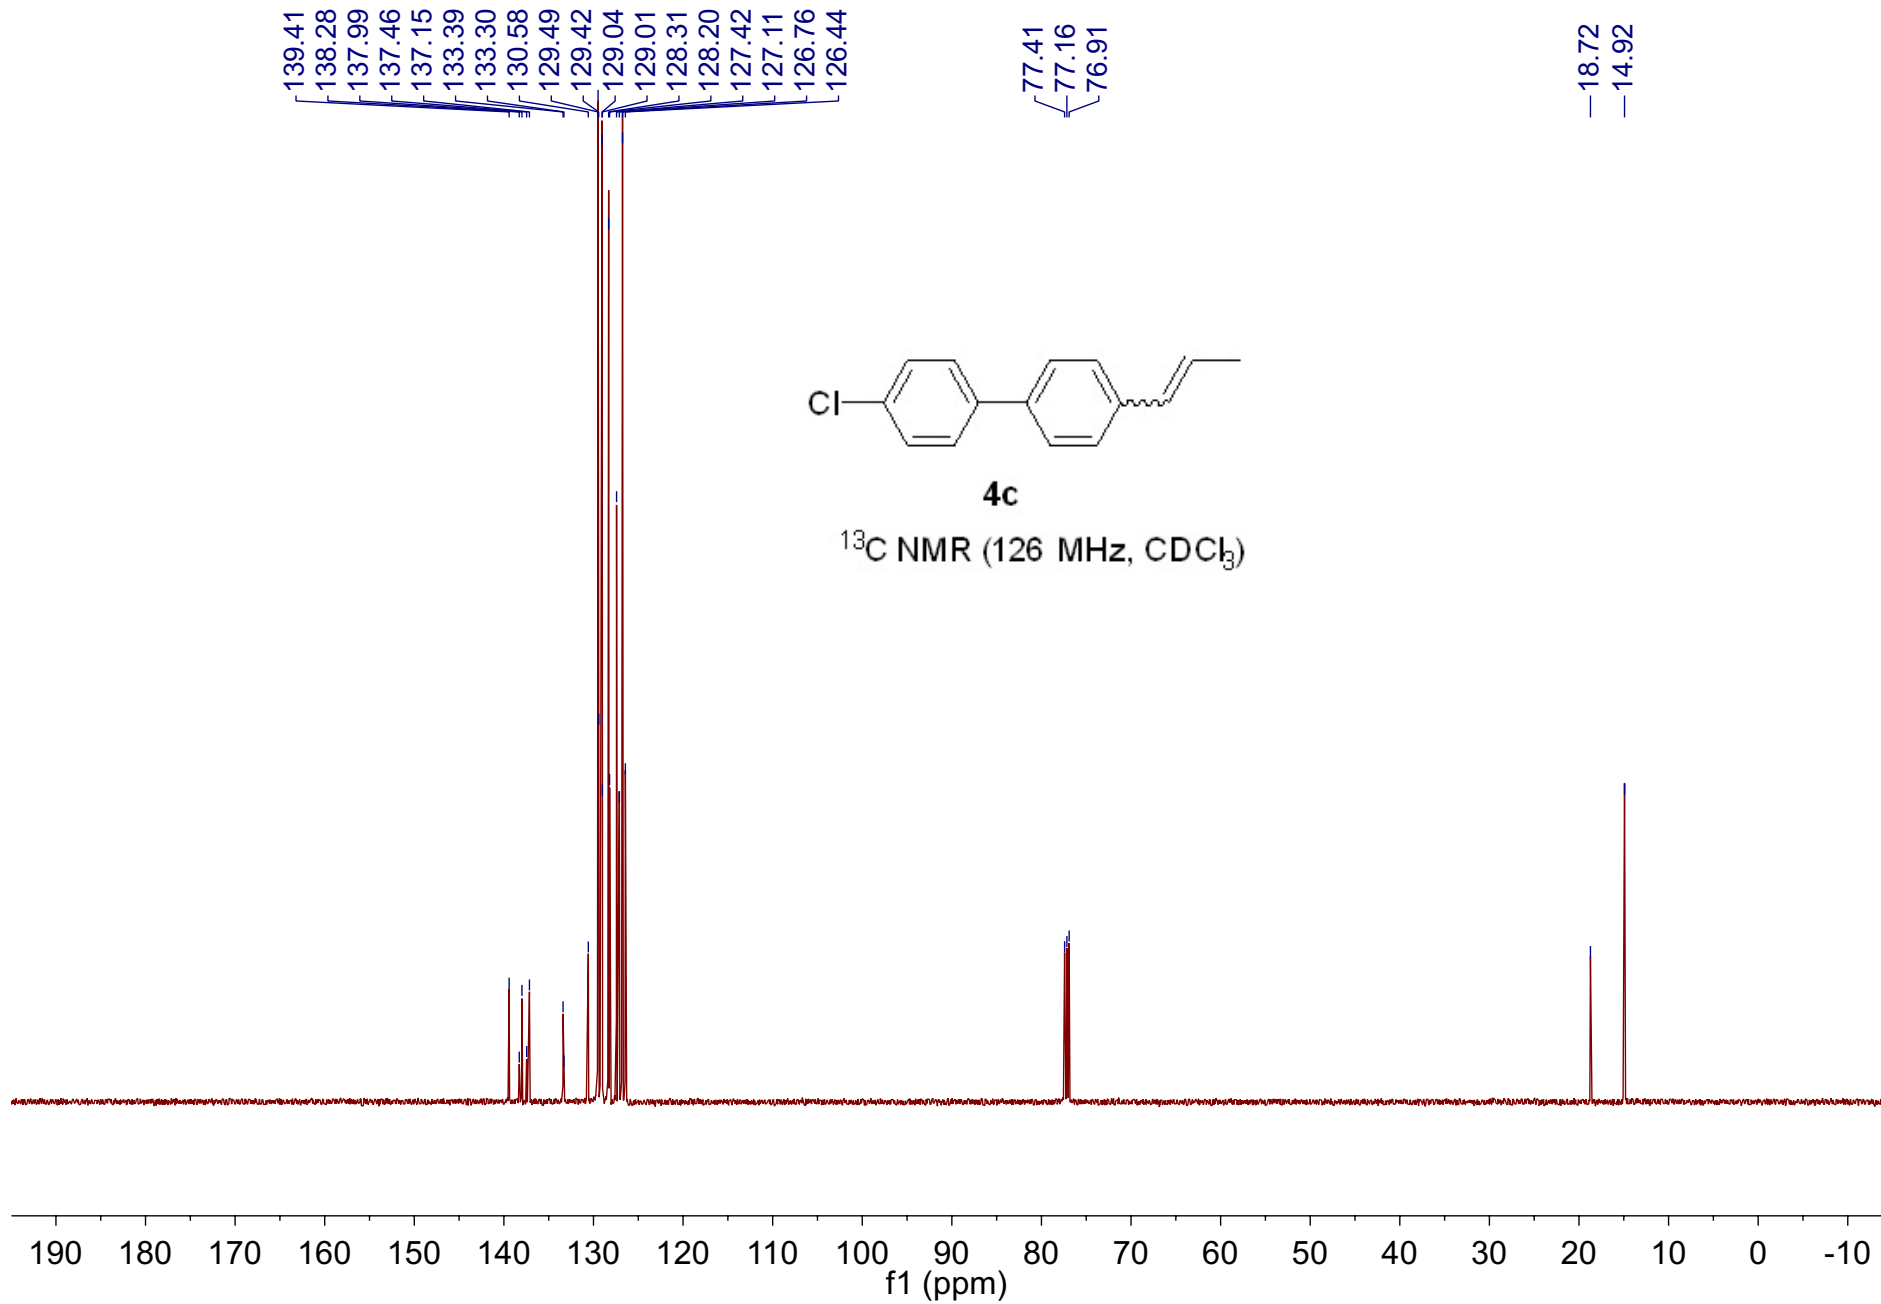

Supplementary Fig. 204.  $^{13}\text{C}$  NMR (126 MHz,  $\text{CDCl}_3$ ) spectra for compound **4c**



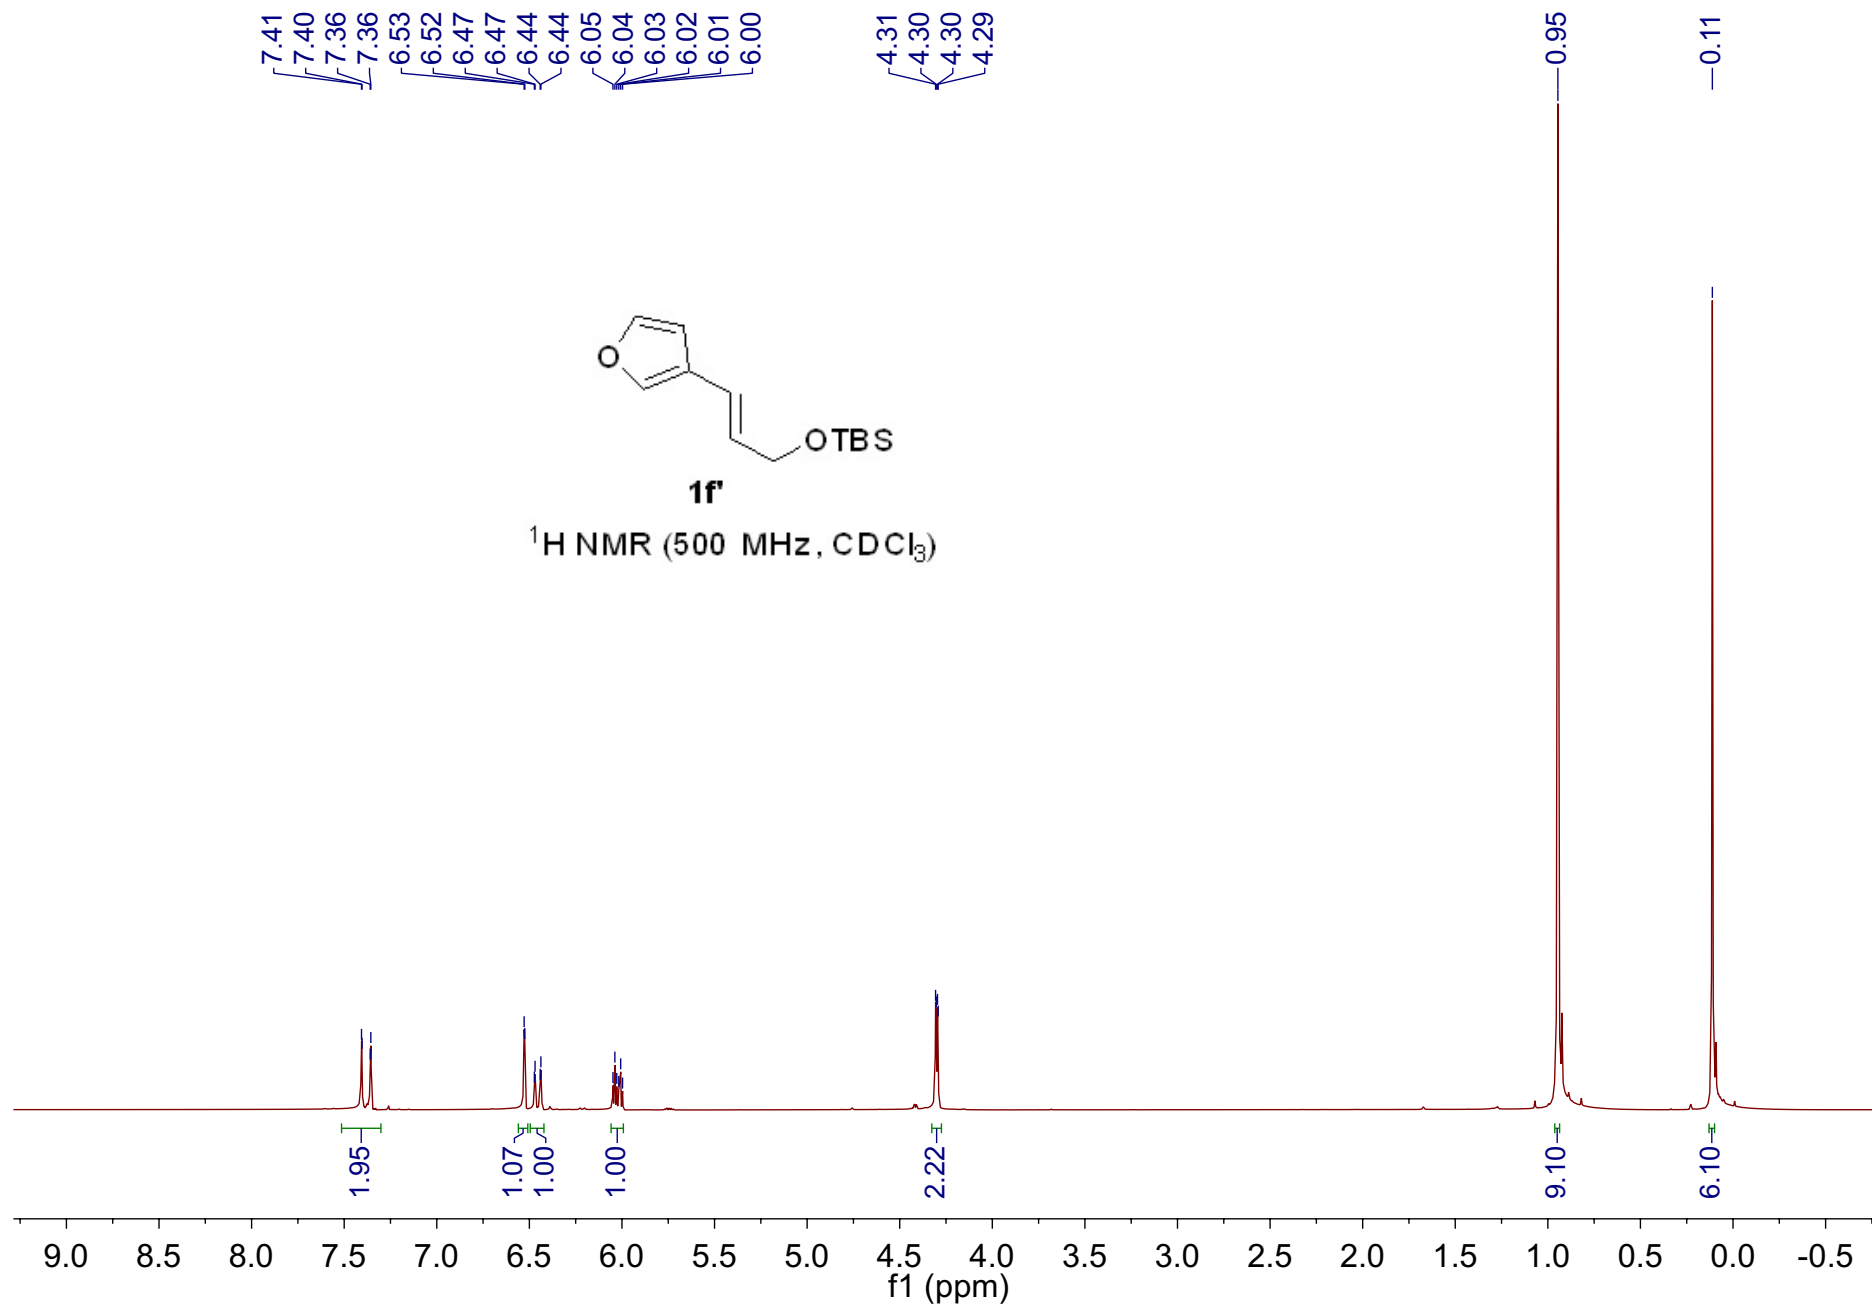

Supplementary Fig. 205. <sup>1</sup>H NMR (500 MHz, CDCl<sub>3</sub>) spectra for compound **1f'**

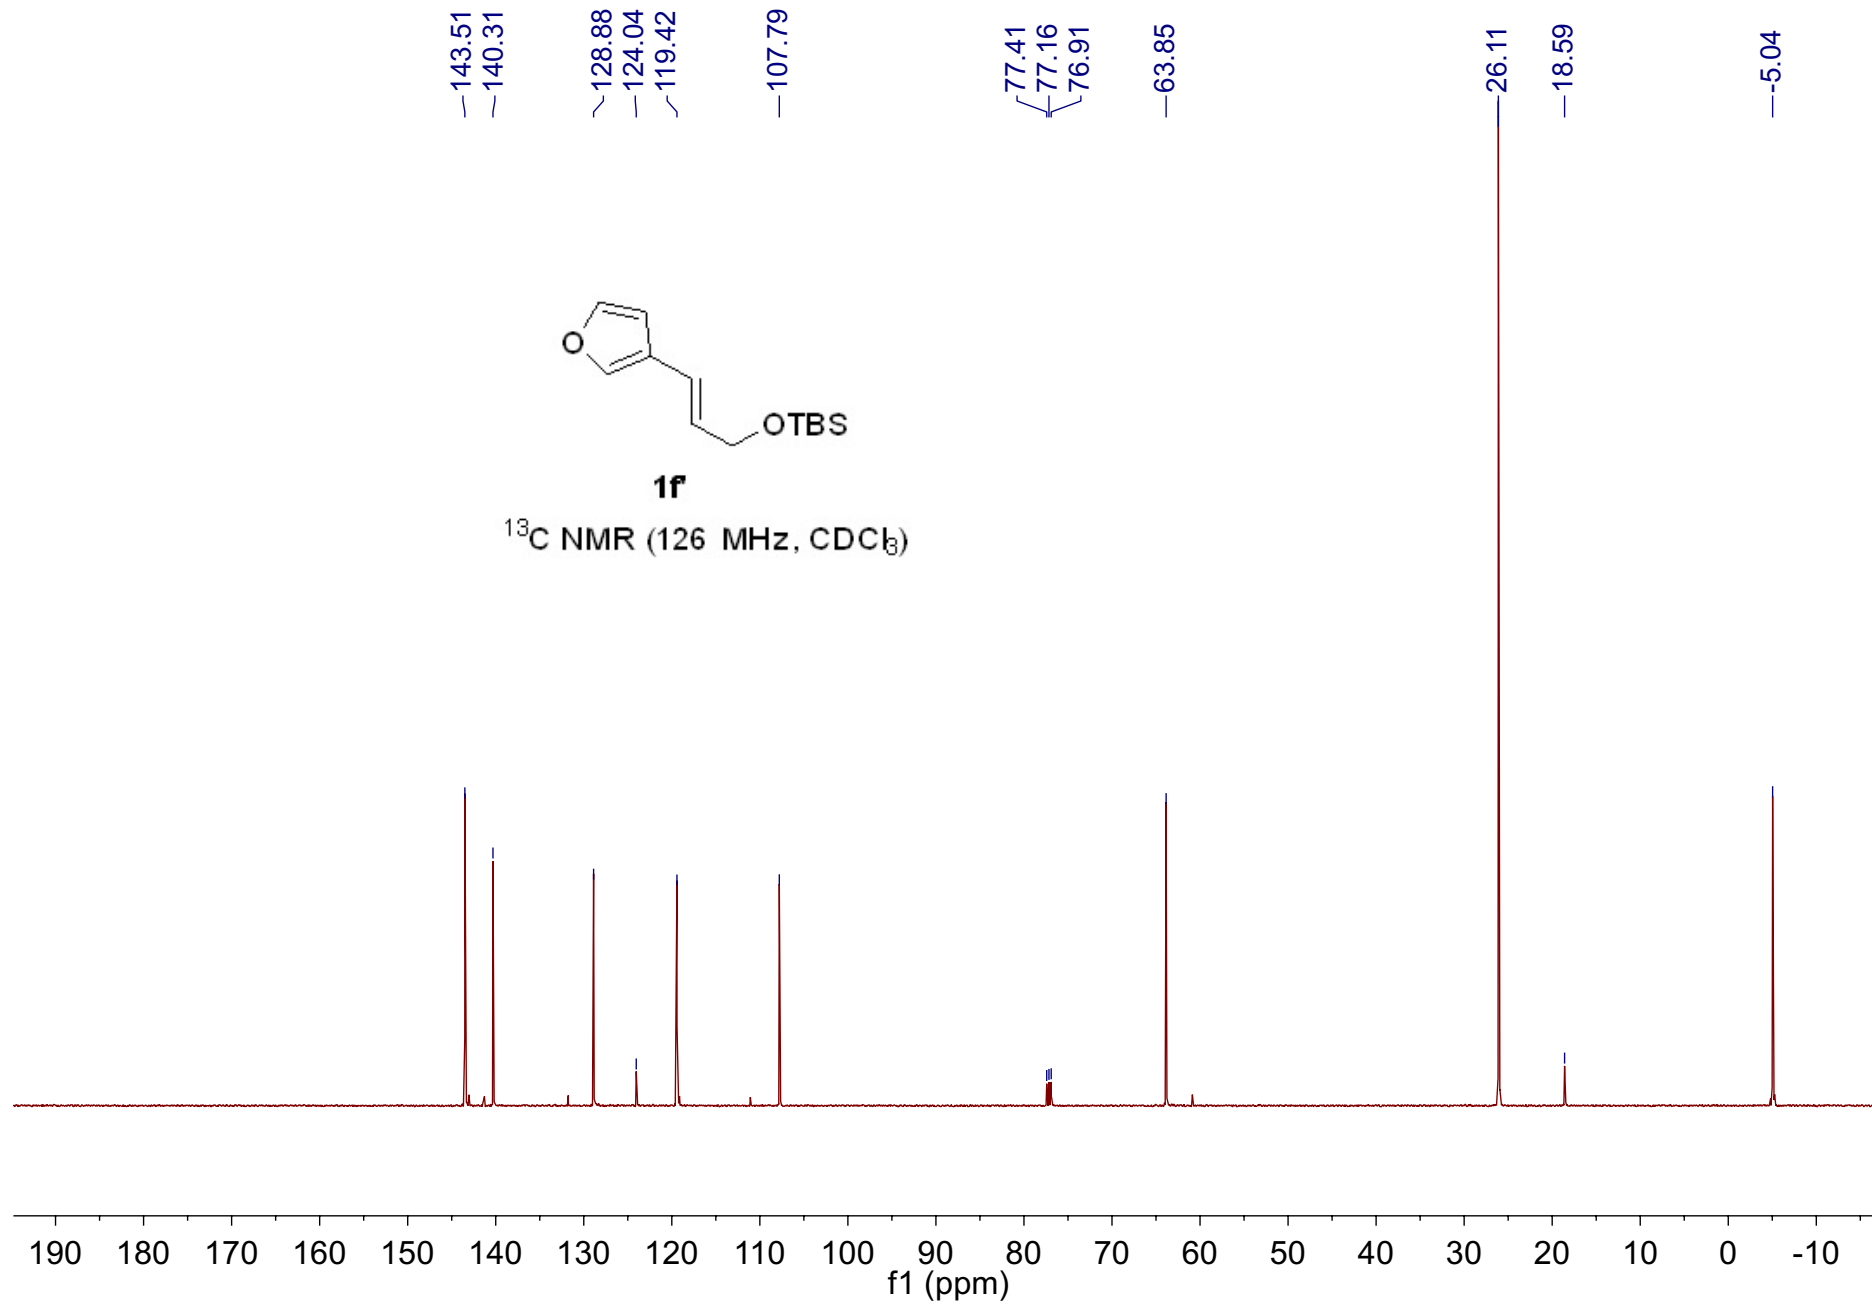

Supplementary Fig. 206. <sup>1</sup>H NMR (126 MHz, CDCl<sub>3</sub>) spectra for compound **1f**

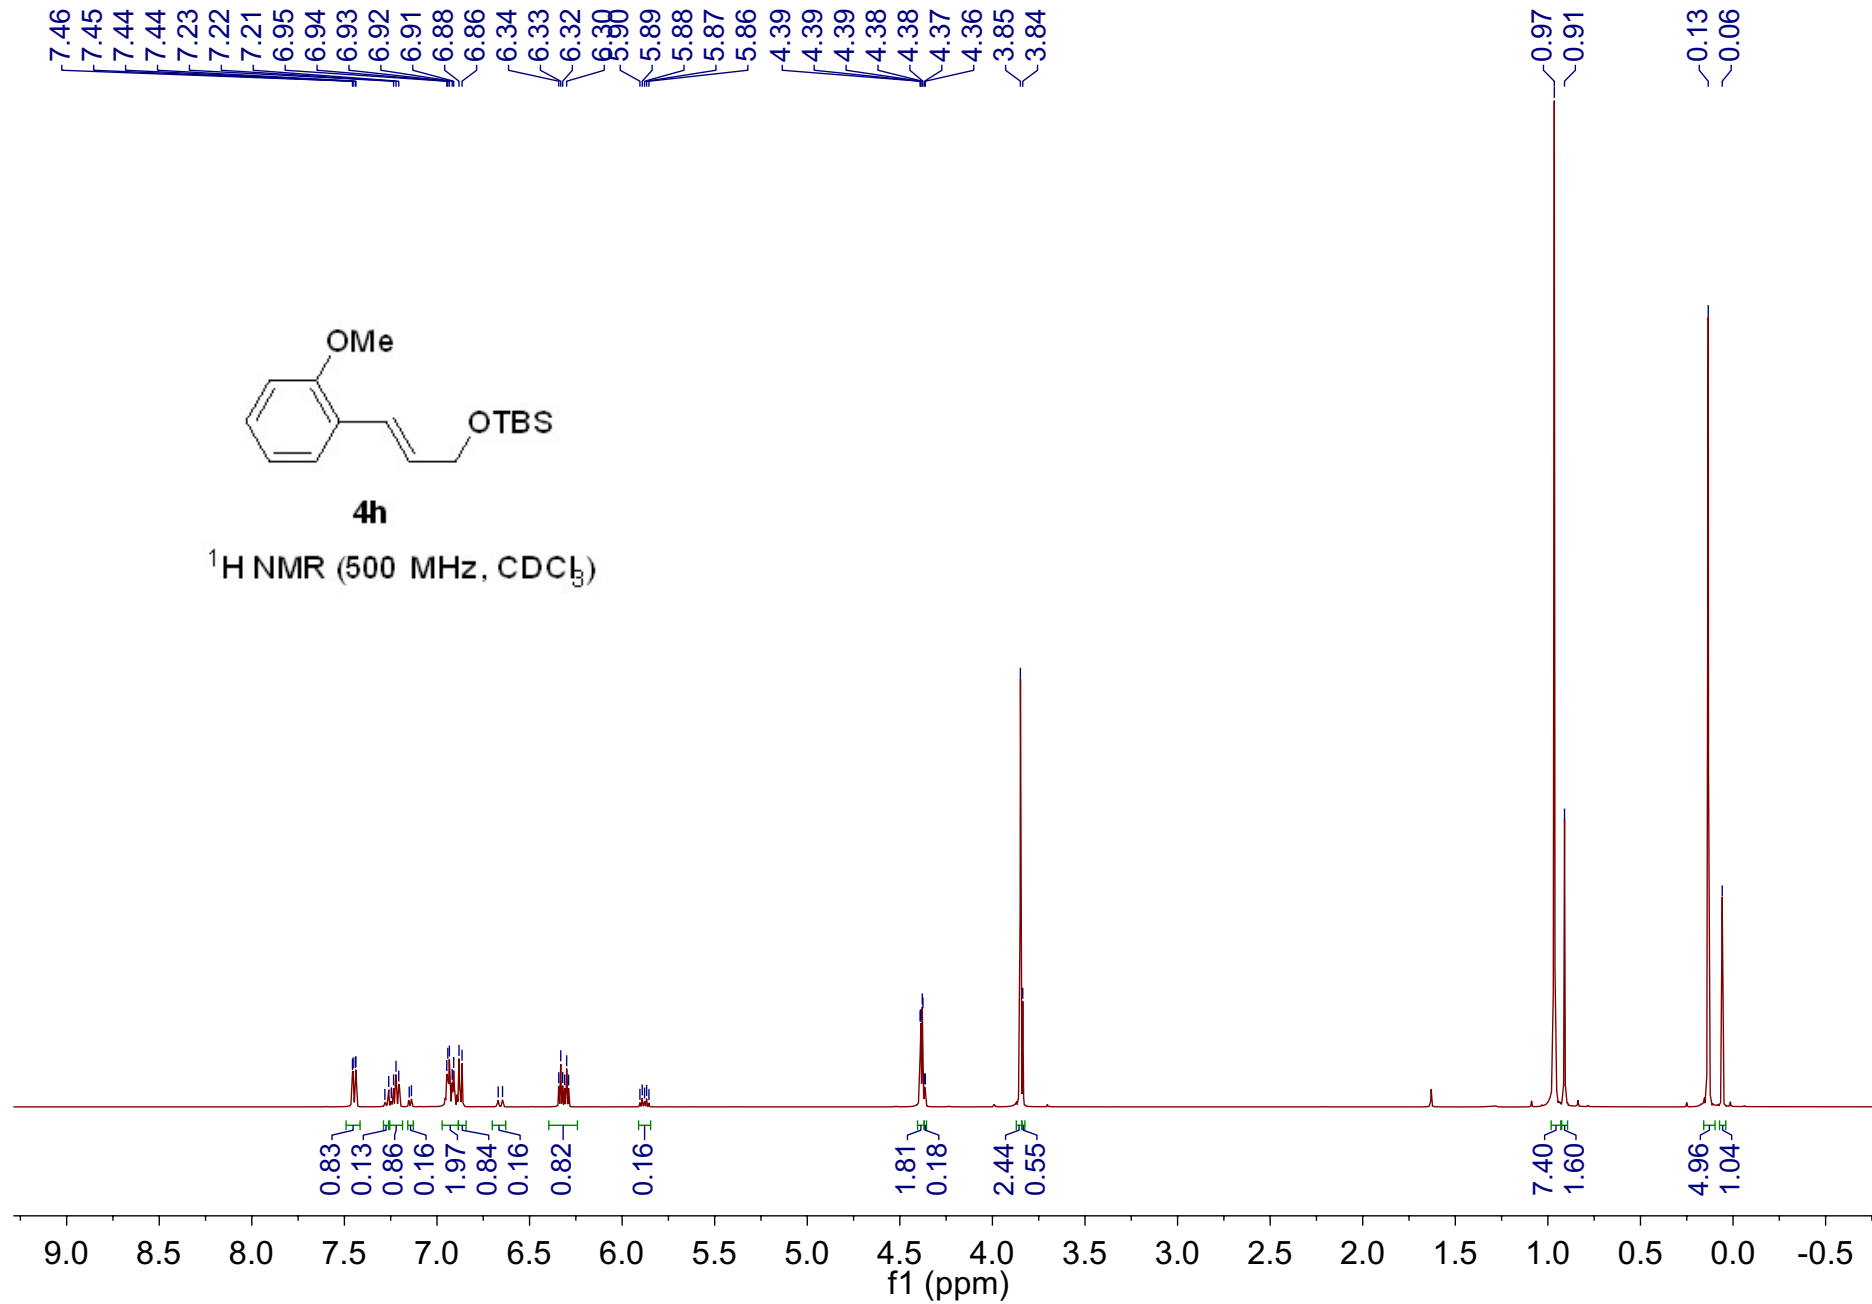

Supplementary Fig. 207. <sup>1</sup>H NMR (500 MHz, CDCl<sub>3</sub>) spectra for compound **4h**

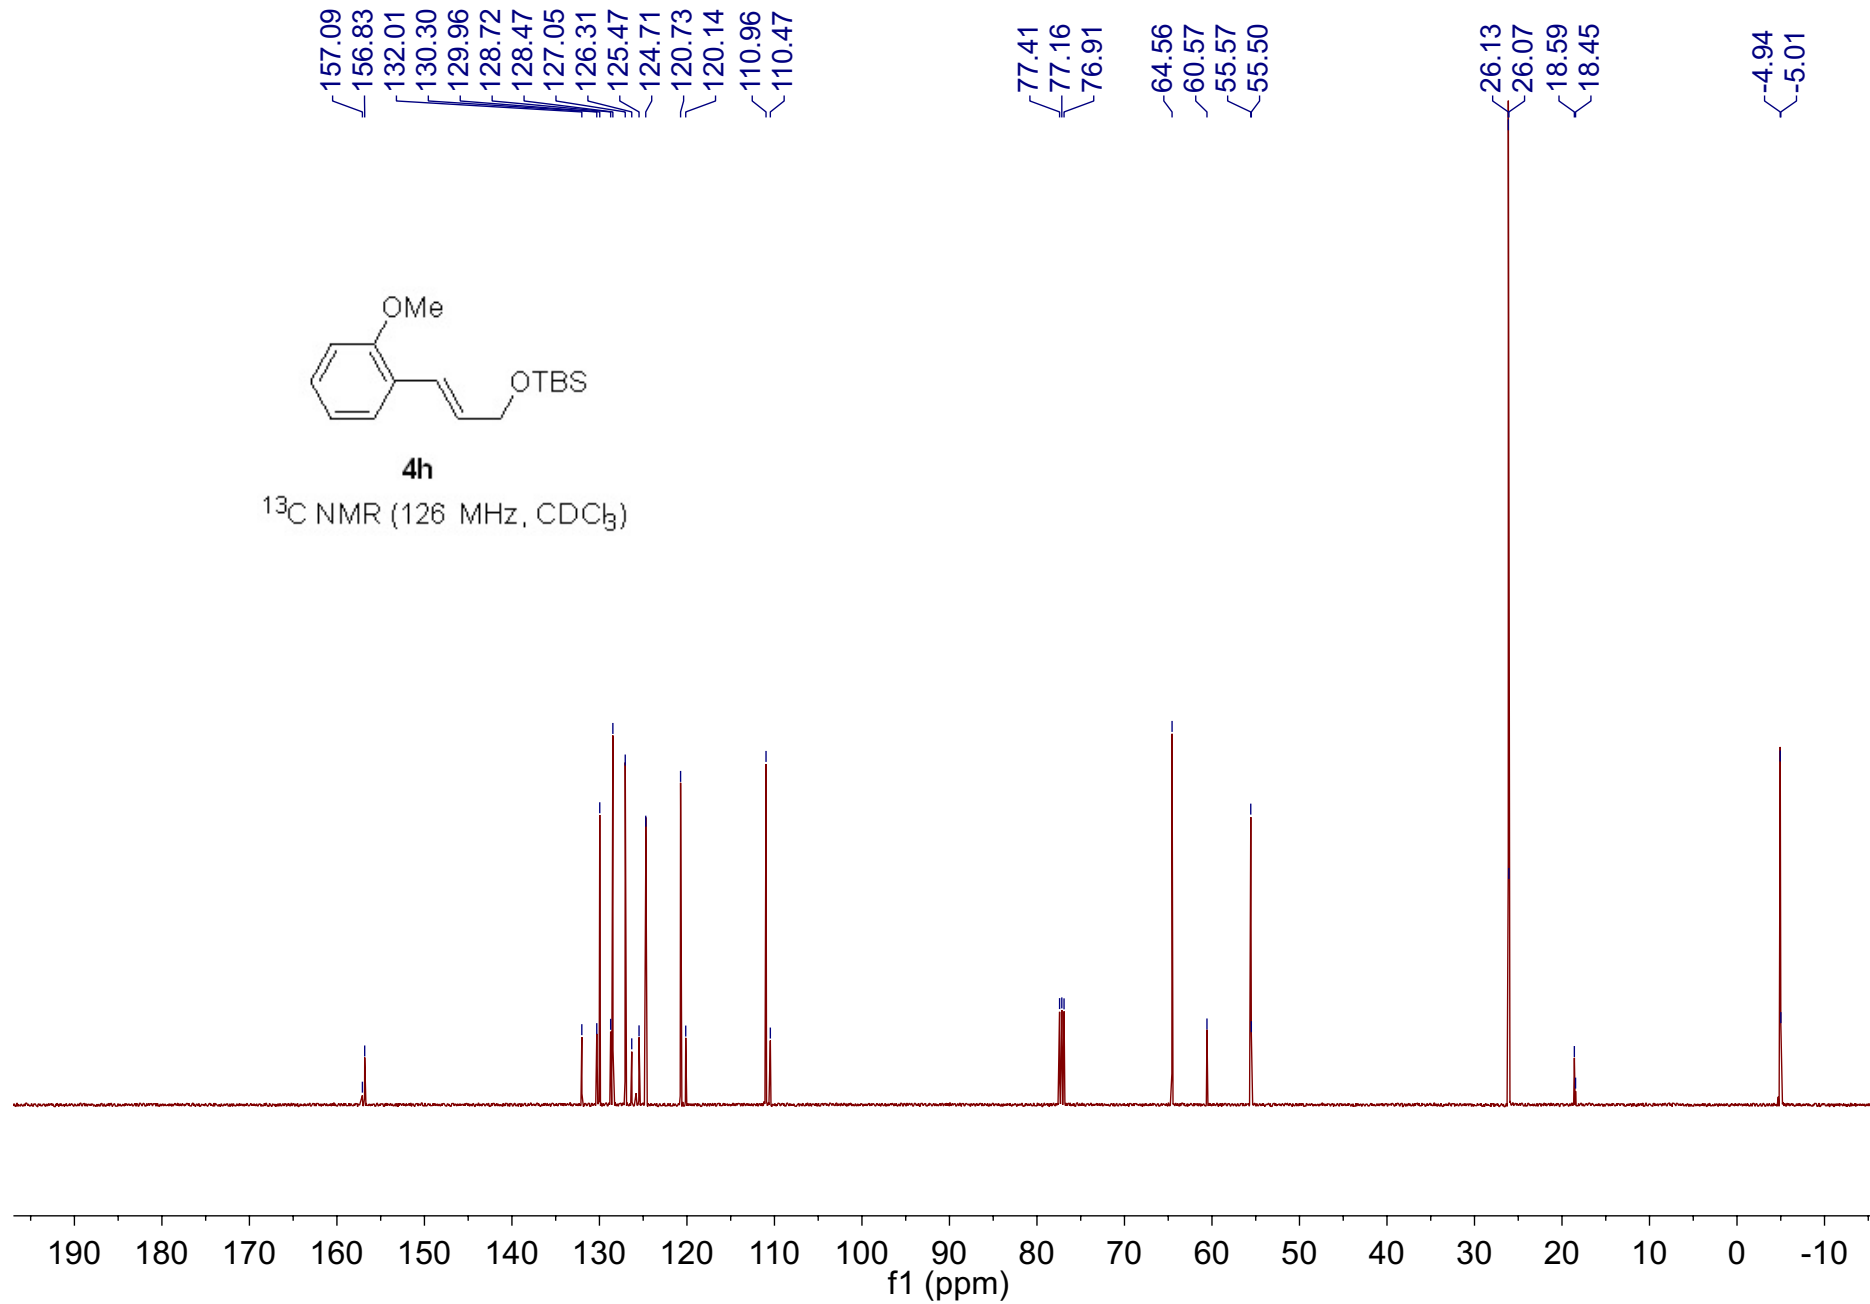

**Supplementary Fig. 208.** <sup>13</sup>C NMR (126 MHz, CDCl<sub>3</sub>) spectra for compound **4h**

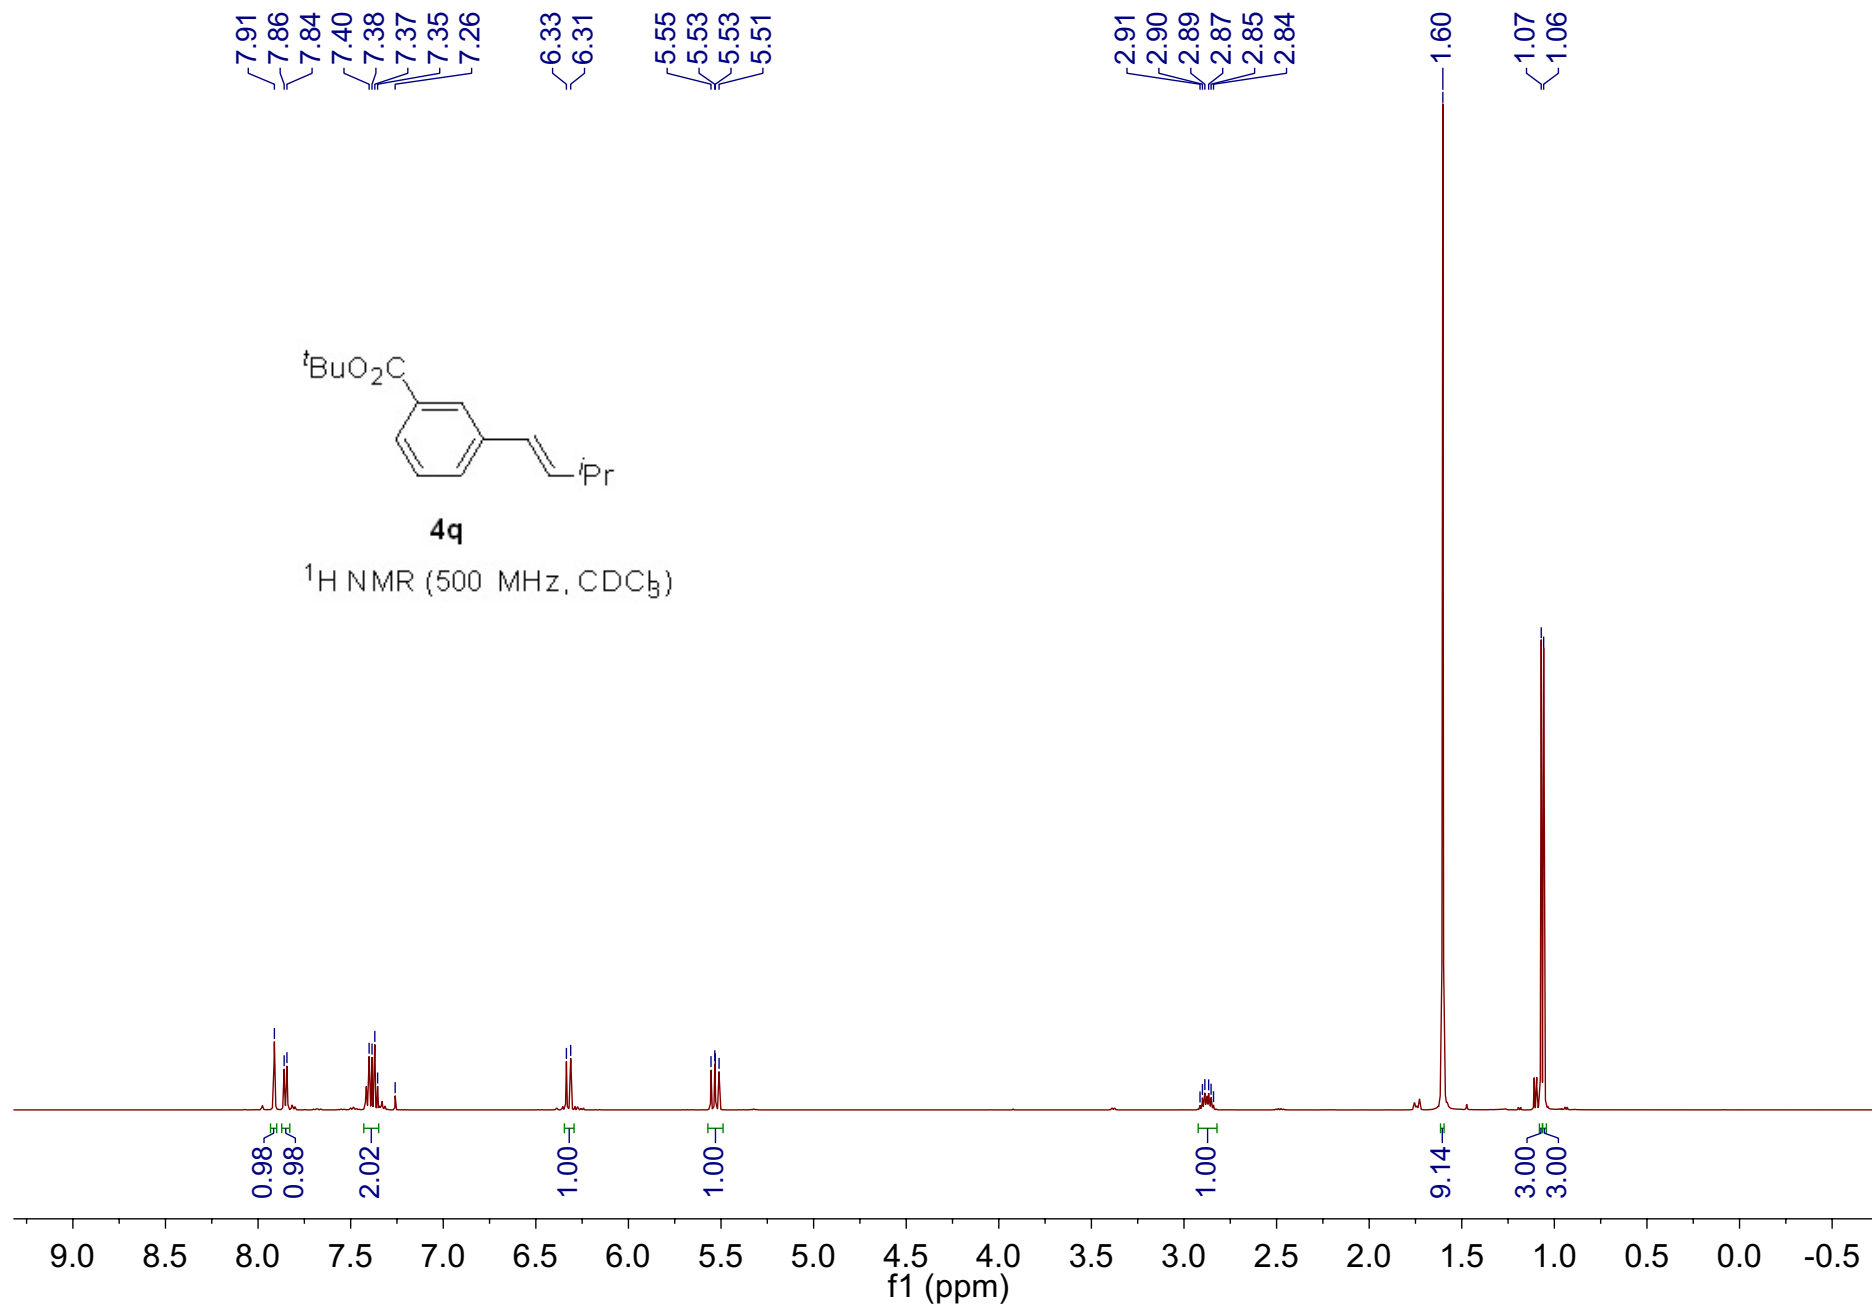

**Supplementary Fig. 209.**  $^1\text{H NMR}$  (500 MHz,  $\text{CDCl}_3$ ) spectra for compound **4q**

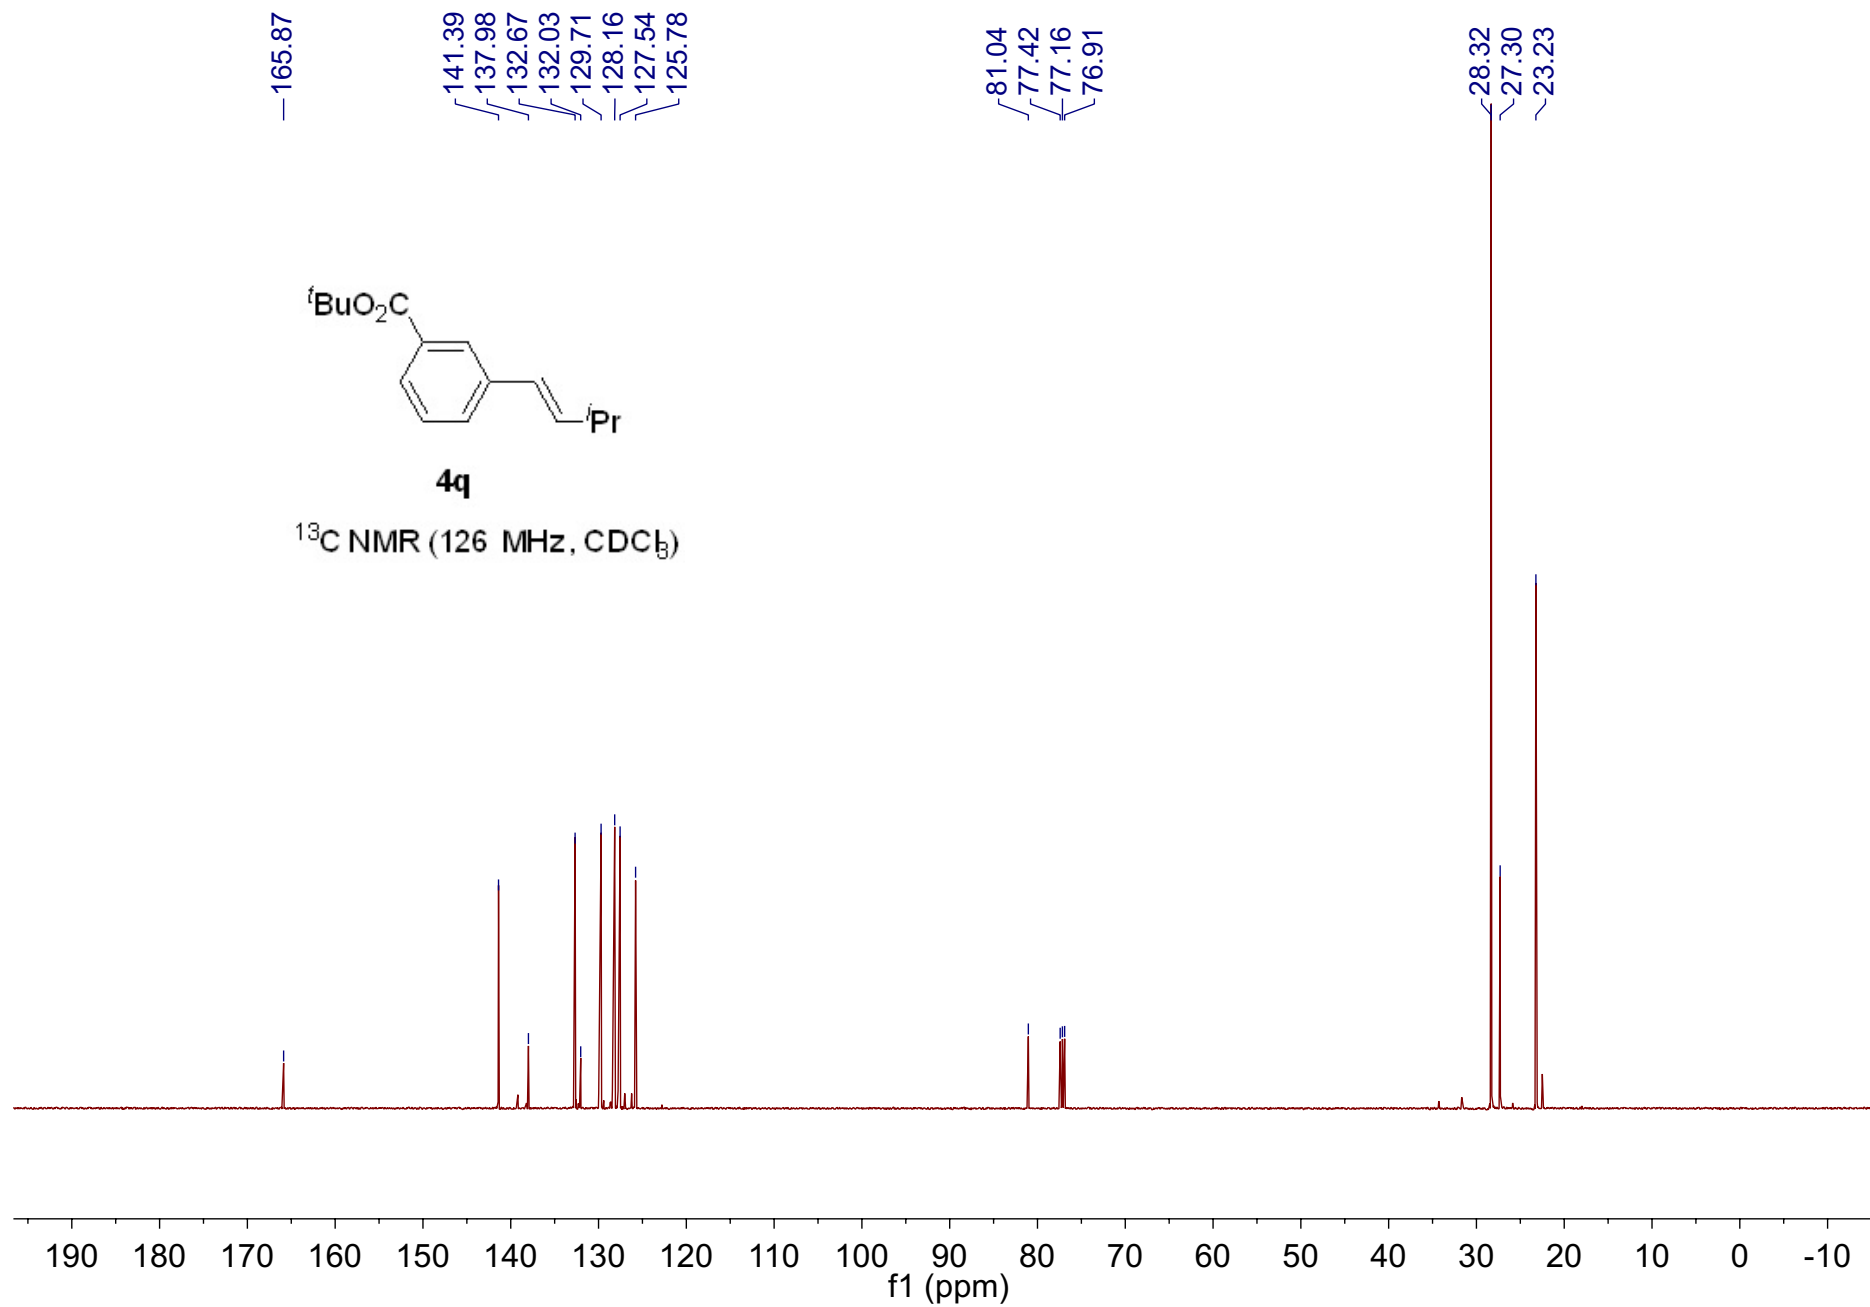

Supplementary Fig. 210. <sup>13</sup>C NMR (126 MHz, CDCl<sub>3</sub>) spectra for compound **4q**

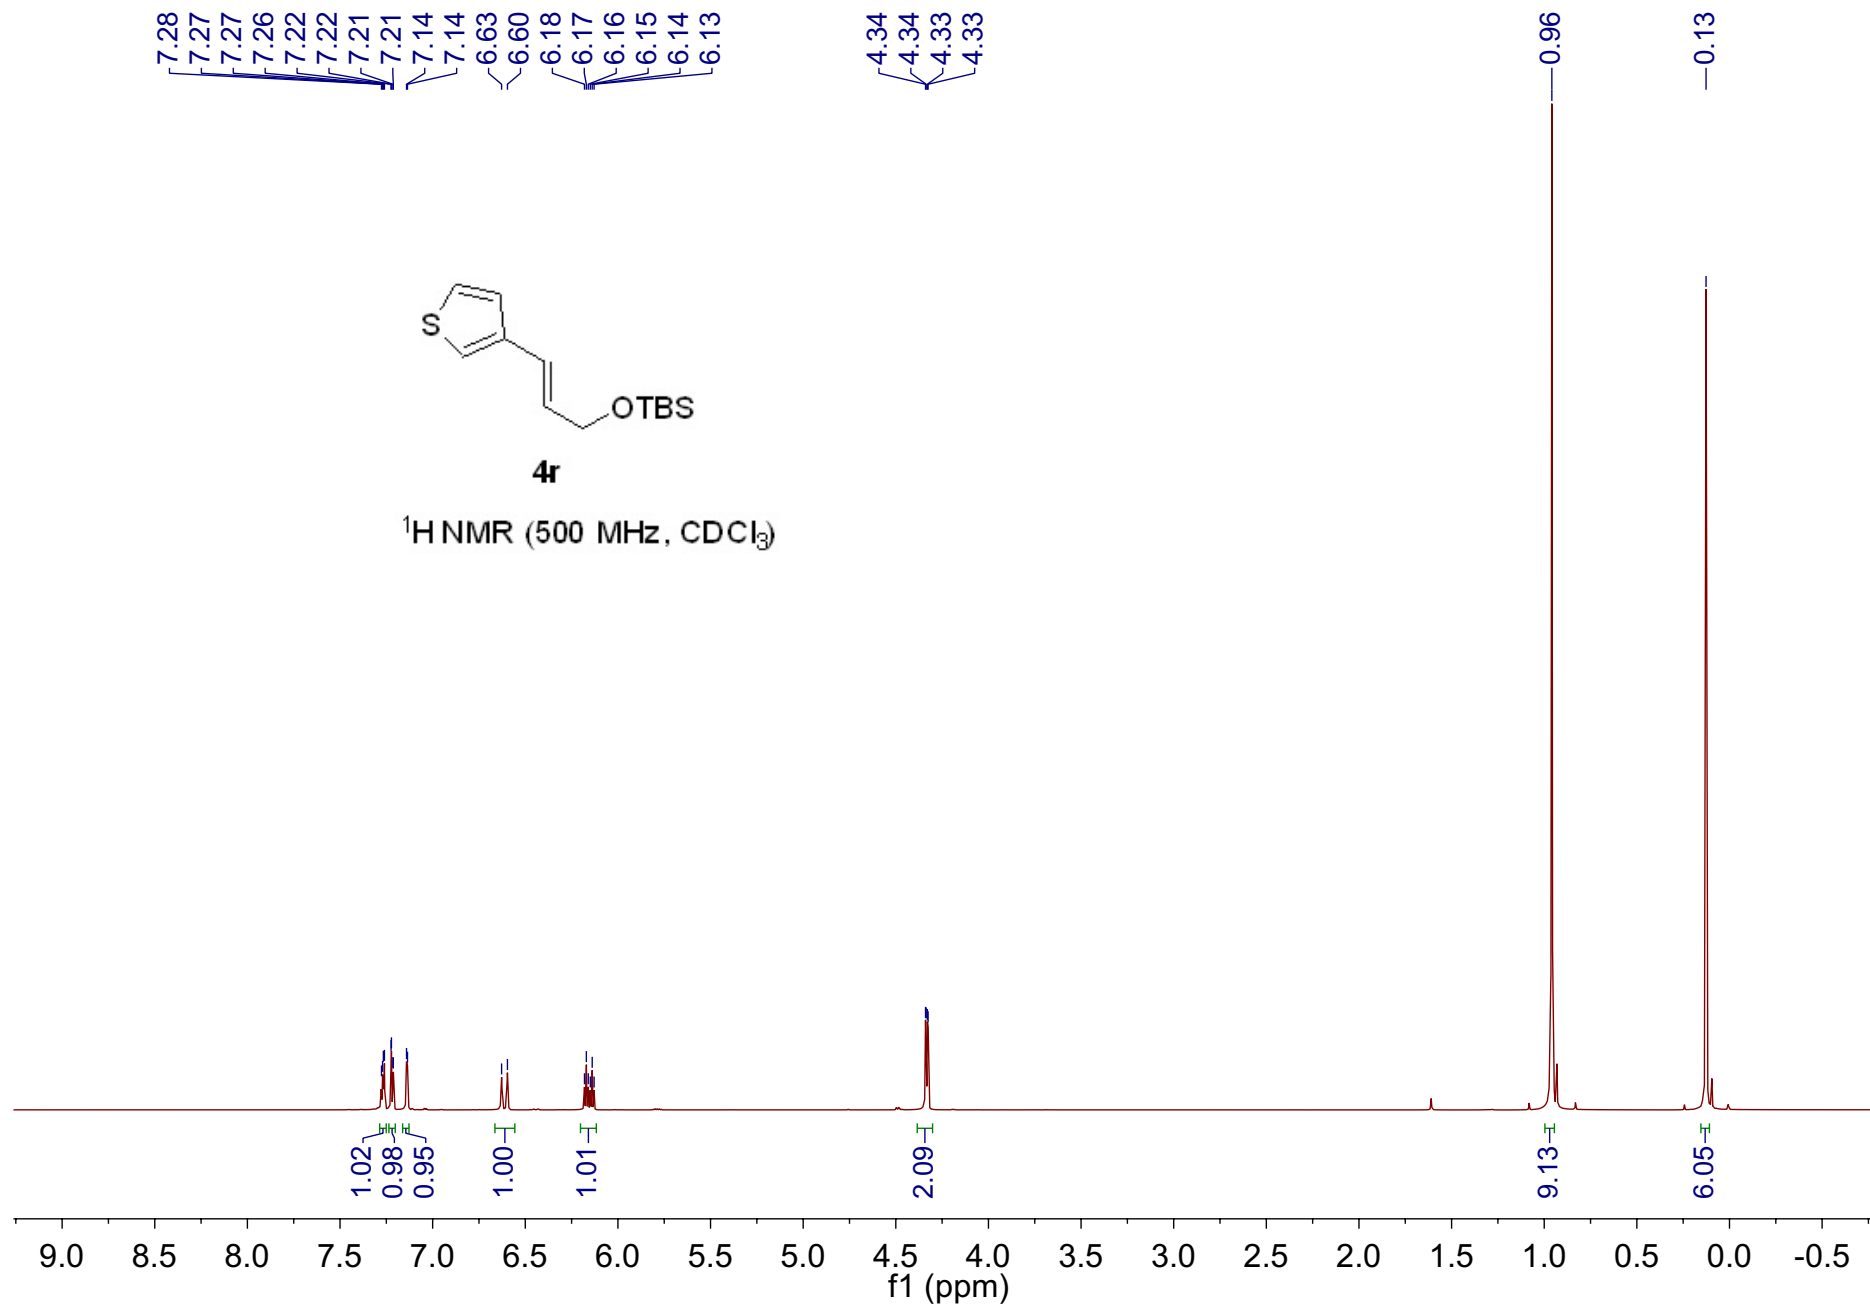

Supplementary Fig. 211.  $^1\text{H NMR}$  (500 MHz,  $\text{CDCl}_3$ ) spectra for compound **4r**

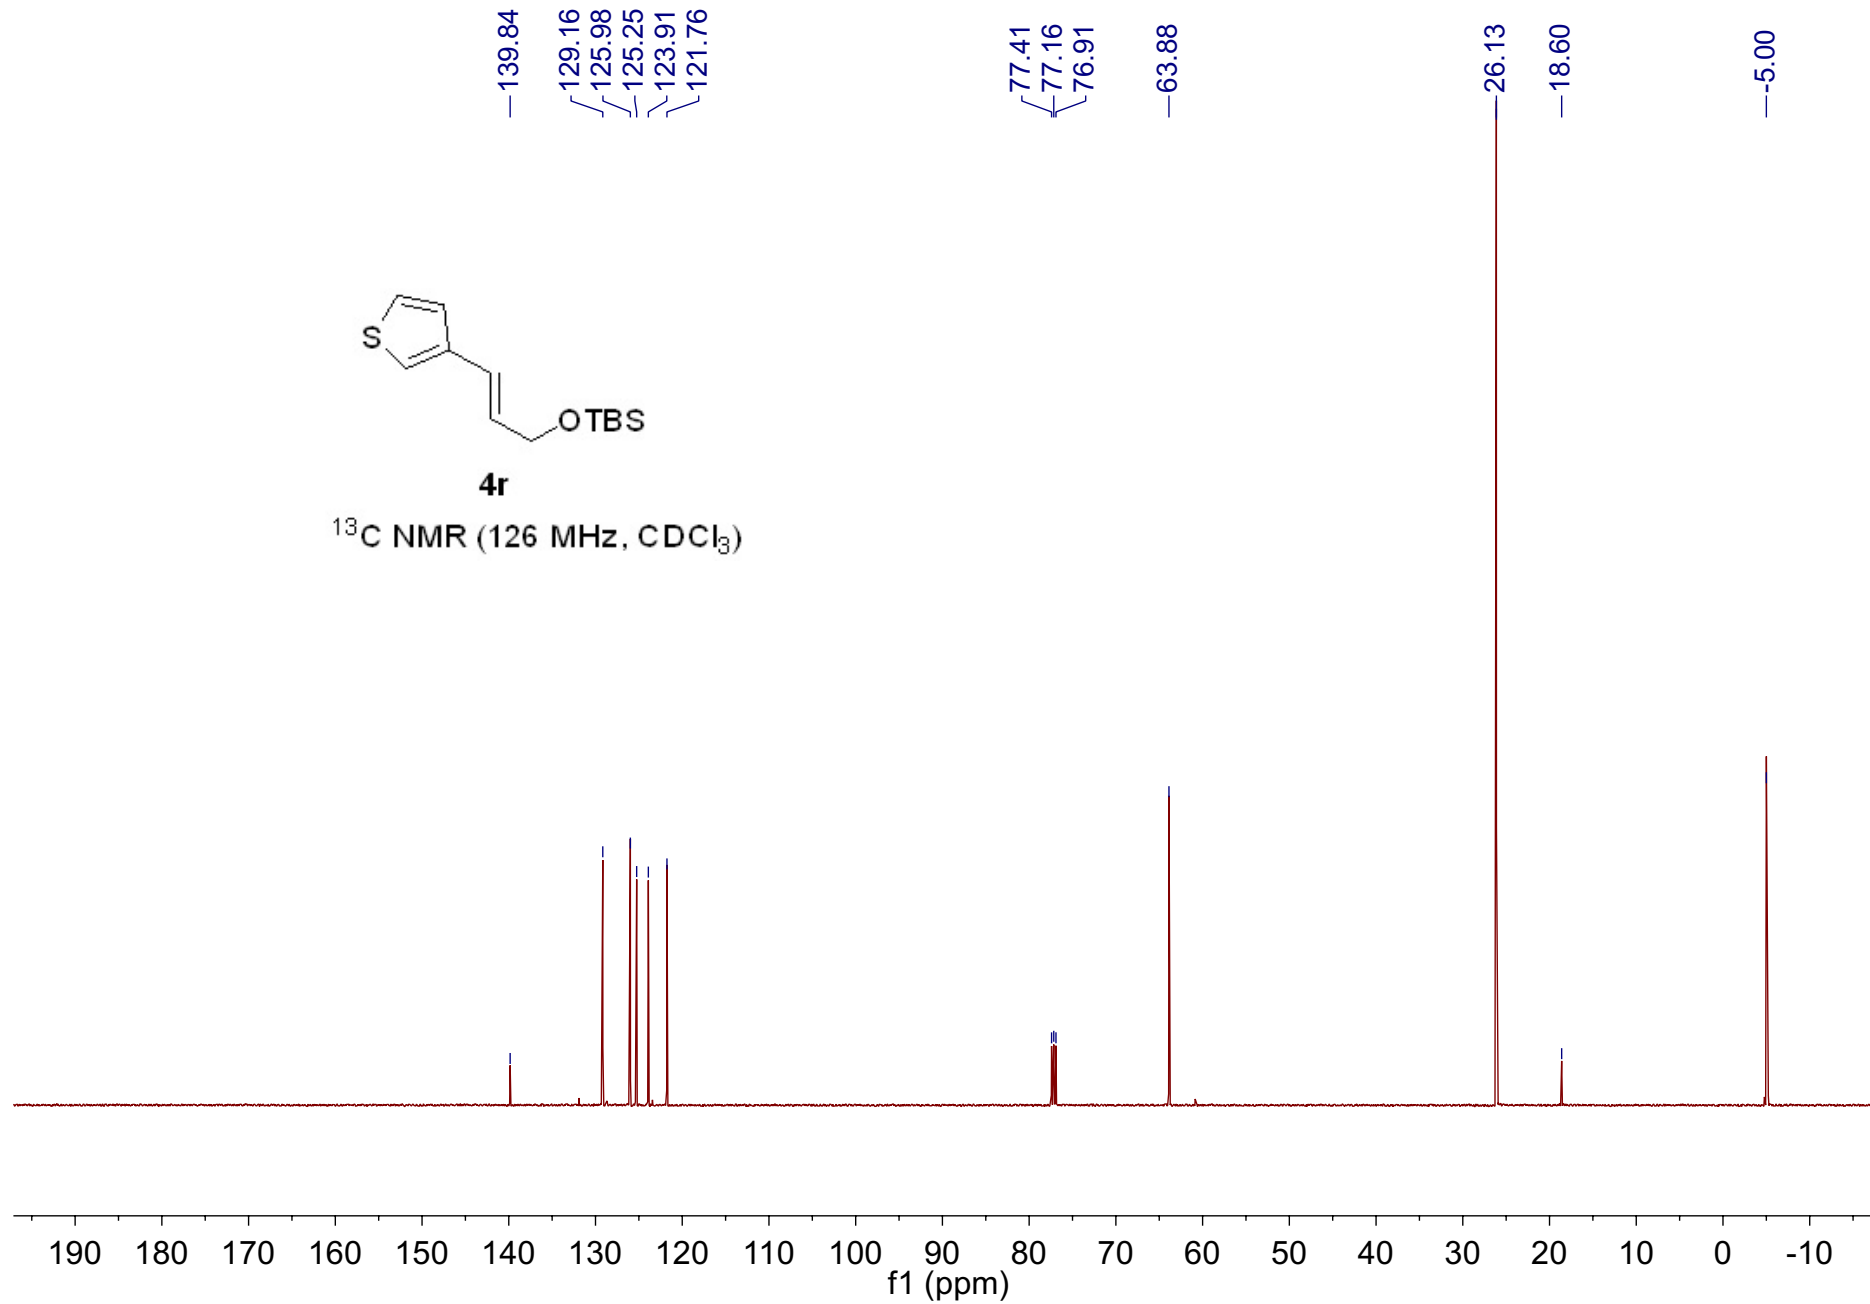

Supplementary Fig. 212.  $^{13}\text{C}$  NMR (126 MHz,  $\text{CDCl}_3$ ) spectra for compound **4r**



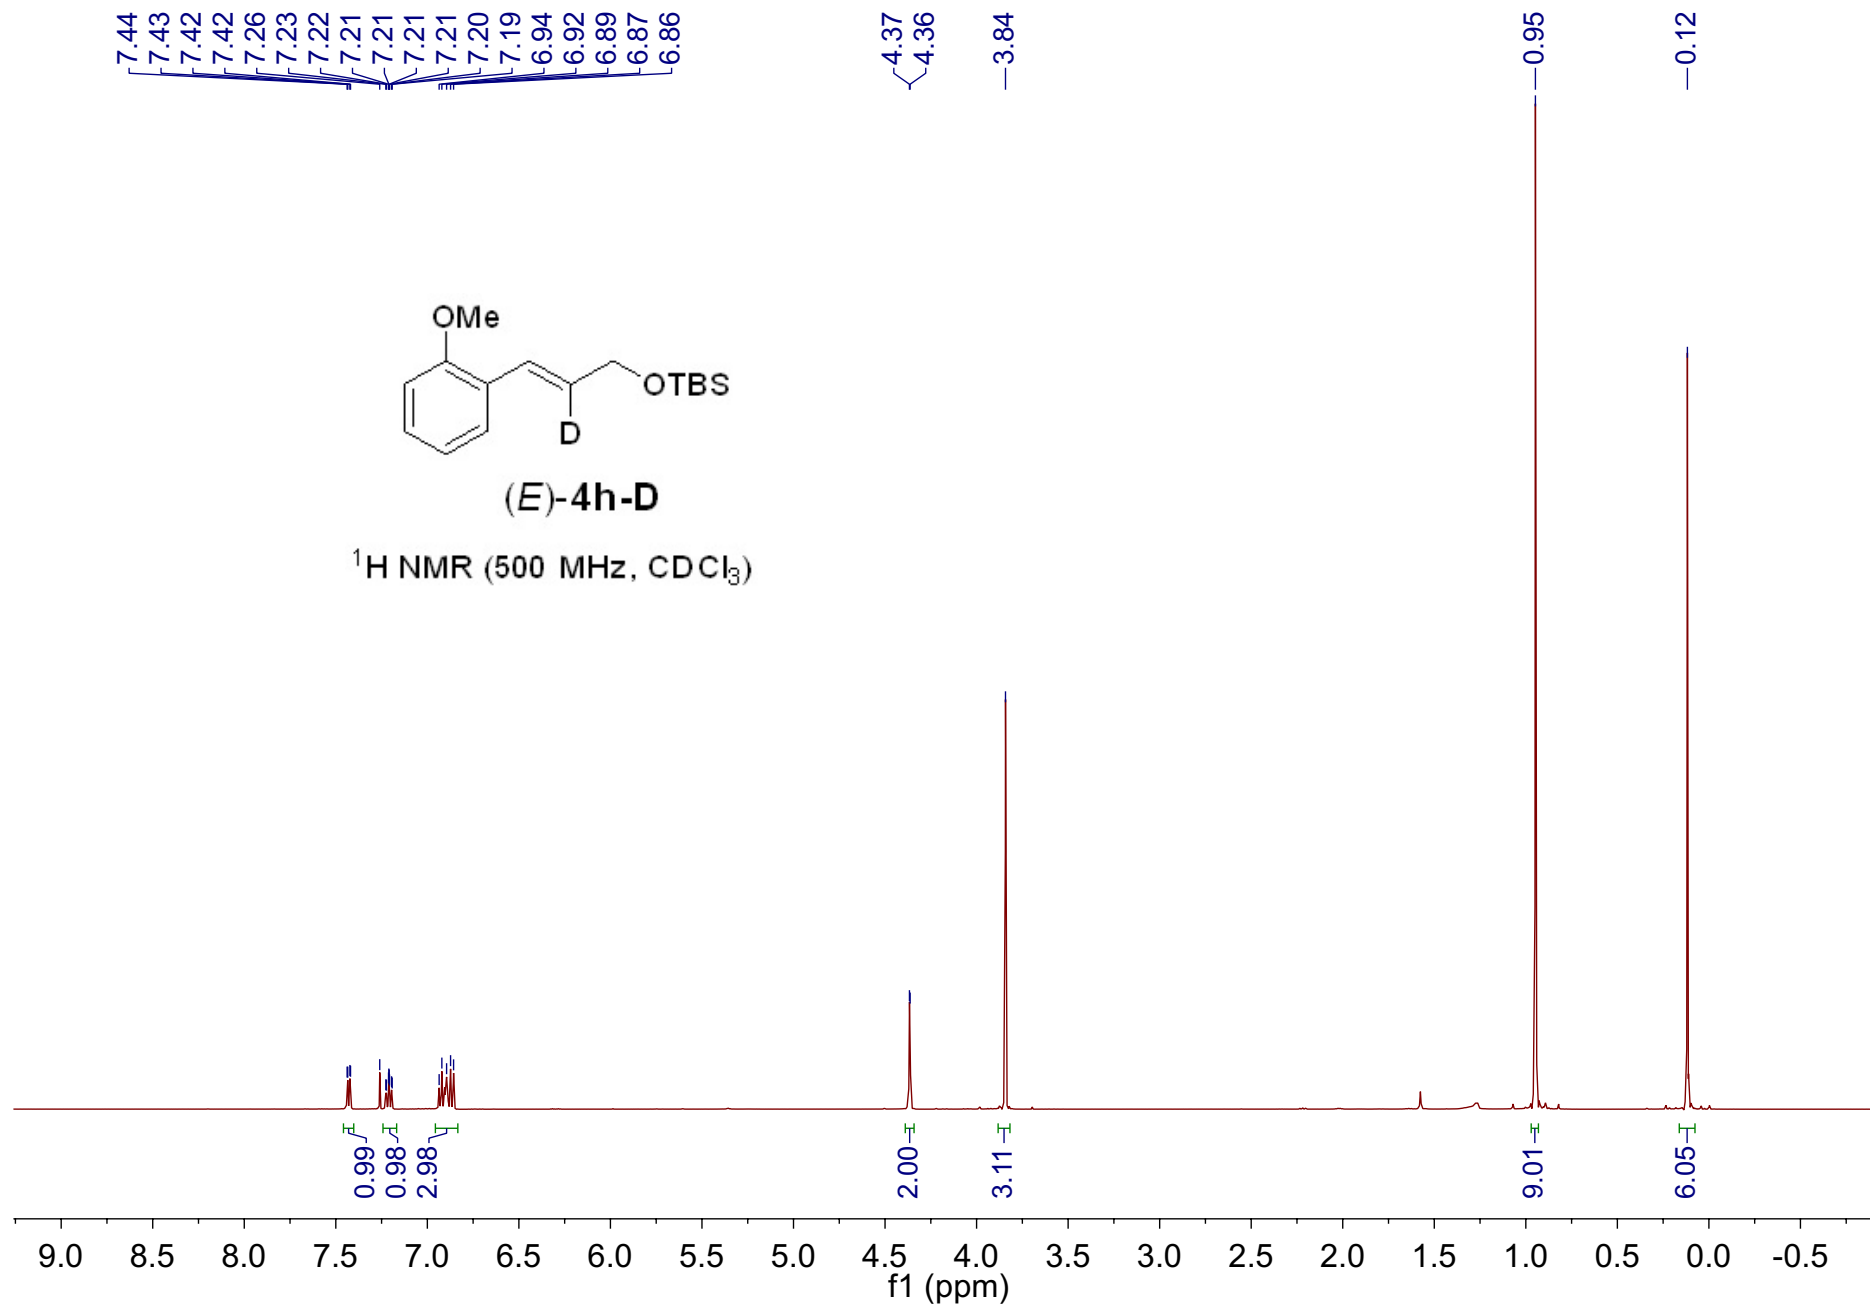

**Supplementary Fig. 213.** <sup>1</sup>H NMR (500 MHz, CDCl<sub>3</sub>) spectra for compound (*E*)-4h-D

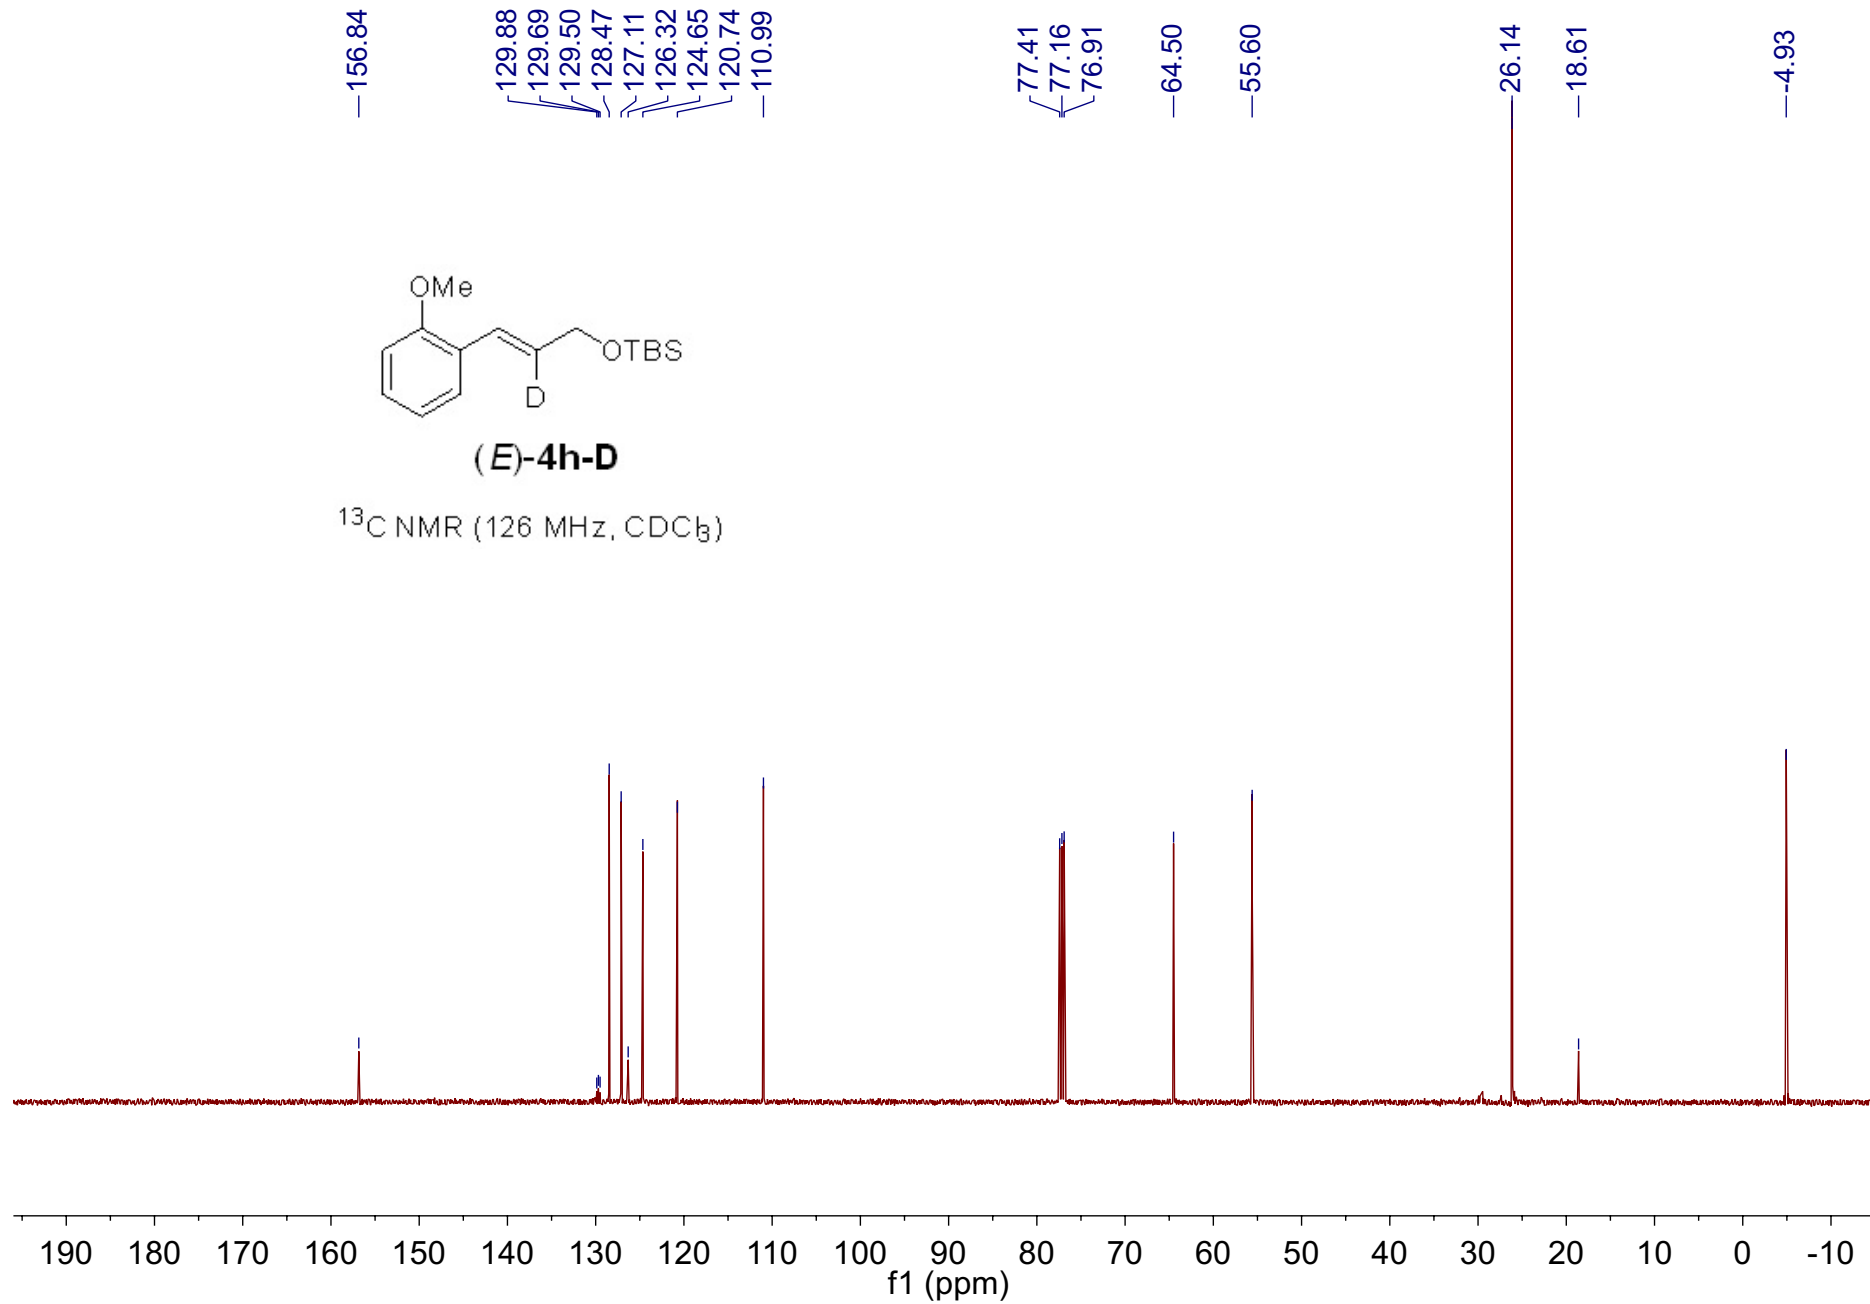

Supplementary Fig. 214.  $^1\text{H}$  NMR (126 MHz,  $\text{CDCl}_3$ ) spectra for compound **(E)-4h-D**

=====  
Acq. Operator : 系统 Seq. Line : 7  
Acq. Instrument : HPLC-1260 Location : 93  
Injection Date : 7/30/2020 7:51:24 PM Inj : 1  
Inj Volume : 3.000 µl  
Different Inj Volume from Sample Entry! Actual Inj Volume : 0.200 µl  
Acq. Method : D:\JXL\20200730\YH 2020-07-30 16-30-45\01 PA-35-0.8-1-2-220-JXL.M  
Last changed : 7/30/2020 7:54:31 PM by 系统  
(modified after loading)  
Analysis Method : E:\DATA\20201027\LC 2020-12-13 20-54-13\81 PA\_40\_0.8\_4.M (Sequence Method)  
Last changed : 12/18/2020 8:28:46 PM by SYSTEM  
(modified after loading)  
Additional Info : Peak(s) manually integrated

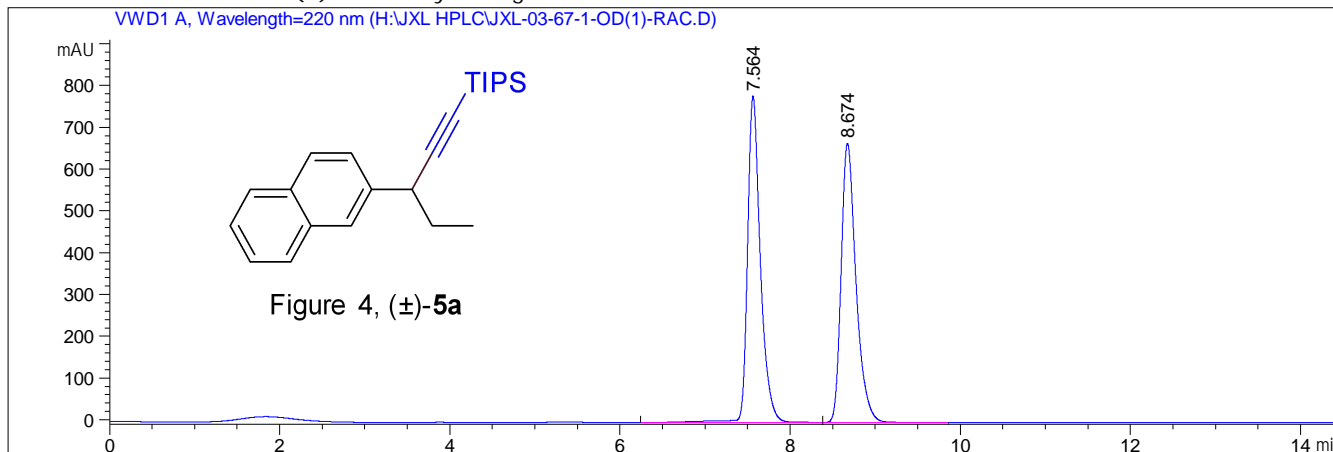

=====  
Area Percent Report  
=====

Sorted By : Signal  
Multiplier : 1.0000  
Dilution : 1.0000  
Do not use Multiplier & Dilution Factor with ISTDs

Signal 1: VWD1 A, Wavelength=220 nm

| Peak # | RetTime [min] | Type | Width [min] | Area [mAU*s] | Height [mAU] | Area %  |
|--------|---------------|------|-------------|--------------|--------------|---------|
| 1      | 7.564         | VB R | 0.1577      | 8214.19043   | 781.32666    | 50.3793 |
| 2      | 8.674         | BB   | 0.1833      | 8090.48779   | 667.96808    | 49.6207 |

Totals : 1.63047e4 1449.29474

=====  
\*\*\* End of Report \*\*\*

=====

|                 |                         |            |            |
|-----------------|-------------------------|------------|------------|
| Acq. Operator   | : 系统                    | Seq. Line  | : 14       |
| Acq. Instrument | : HPLC-1260             | Location   | : 71       |
| Injection Date  | : 8/13/2020 12:53:42 AM | Inj        | : 2        |
|                 |                         | Inj Volume | : 3.000 µl |

Different Inj Volume from Sample Entry! Actual Inj Volume : 0.300 µl

|                 |                                                                              |
|-----------------|------------------------------------------------------------------------------|
| Acq. Method     | : D:\JXL\20200812\YH 2020-08-12 19-08-25\01 PA-15-0.8-1-2-220-JXL.M          |
| Last changed    | : 8/12/2020 11:00:47 PM by 系统                                                |
| Analysis Method | : E:\DATA\20201027\LC 2020-12-15 14-02-17\61 PA_10_0.8_3.M (Sequence Method) |
| Last changed    | : 12/15/2020 7:33:03 PM by SYSTEM                                            |

(modified after Loading)

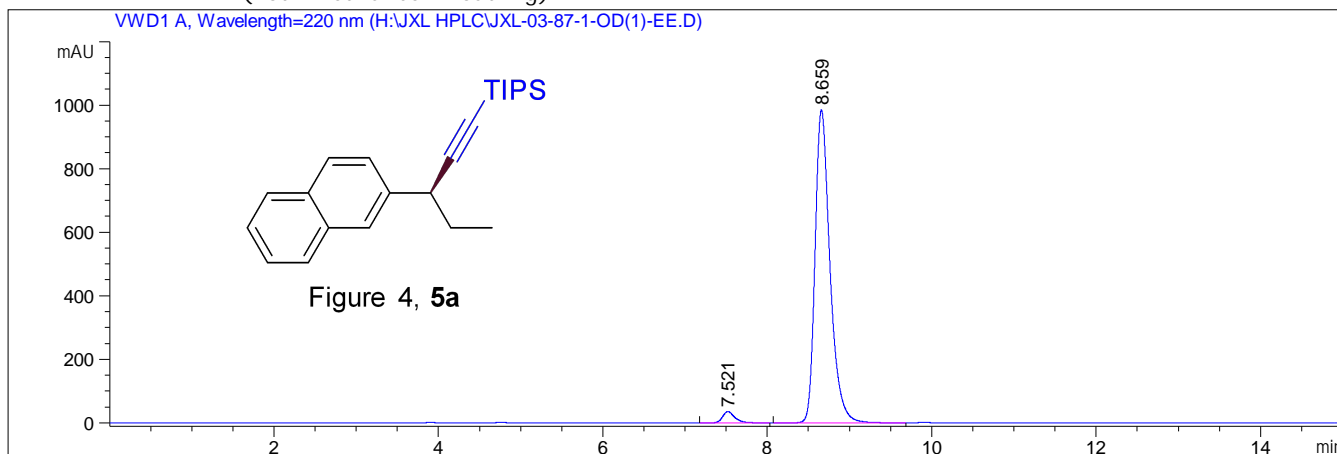

=====  
Area Percent Report  
=====

Sorted By : Signal  
Multiplier : 1.0000  
Dilution : 1.0000  
Do not use Multiplier & Dilution Factor with ISTDs

Signal 1: VWD1 A, Wavelength=220 nm

| Peak # | RetTime [min] | Type | Width [min] | Area [mAU*s] | Height [mAU] | Area %  |
|--------|---------------|------|-------------|--------------|--------------|---------|
| 1      | 7.521         | BB   | 0.1554      | 368.12753    | 35.80718     | 2.8803  |
| 2      | 8.659         | BB   | 0.1909      | 1.24129e4    | 985.56152    | 97.1197 |

Totals : 1.27811e4 1021.36870

=====  
\*\*\* End of Report \*\*\*

```

=====
Acq. Operator   : 系统                               Seq. Line :    4
Acq. Instrument : HPLC-1260                           Location  :   91
Injection Date  : 7/29/2020 2:43:42 PM                 Inj       :    2
                                                    Inj Volume: 3.000 µl
Different Inj Volume from Sample Entry! Actual Inj Volume : 0.300 µl
Acq. Method     : D:\JXL\20200729\YH 2020-07-29 13-10-22\01 PA-40-0.8-1-2-220-JXL.M
Last changed    : 7/29/2020 3:00:14 PM by 系统
                  (modified after Loading)
Analysis Method : E:\DATA\20201027\LC 2020-12-15 14-02-17\61 PA_10_0.8_3.M (Sequence Method)
Last changed    : 12/15/2020 7:34:31 PM by SYSTEM
                  (modified after Loading)
Additional Info : Peak(s) manually integrated
  
```

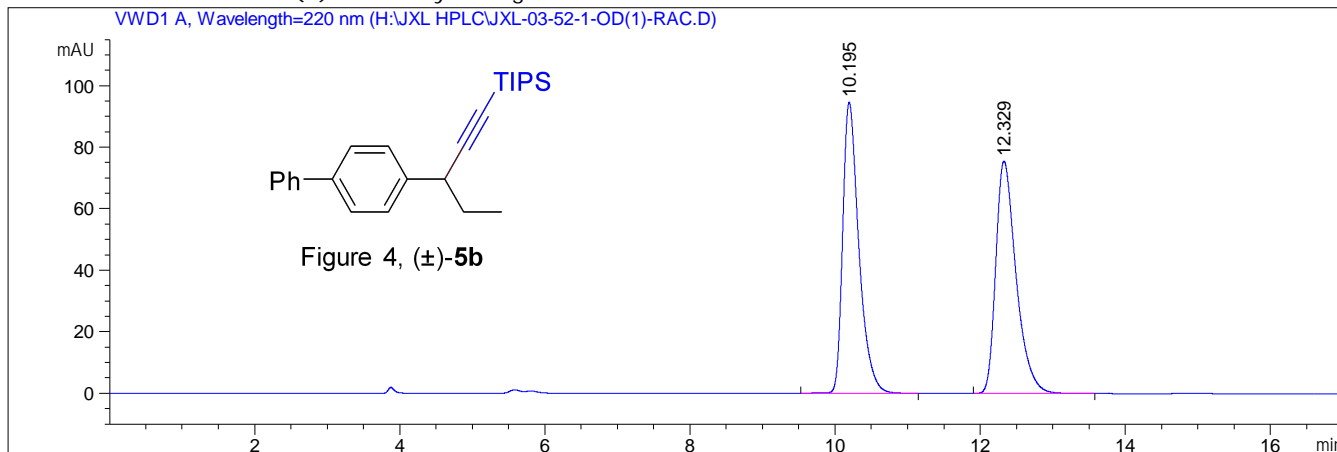

=====  
 Area Percent Report  
 =====

```

Sorted By      :      Signal
Multiplier     :      1.0000
Dilution       :      1.0000
Do not use Multiplier & Dilution Factor with ISTDs
  
```

Signal 1: VWD1 A, Wavelength=220 nm

| Peak # | RetTime [min] | Type | Width [min] | Area [mAU*s] | Height [mAU] | Area %  |
|--------|---------------|------|-------------|--------------|--------------|---------|
| 1      | 10.195        | BB   | 0.2340      | 1469.57141   | 94.70167     | 49.9464 |
| 2      | 12.329        | BB   | 0.2973      | 1472.72339   | 75.57758     | 50.0536 |

Totals :                    2942.29480   170.27924

=====  
 \*\*\* End of Report \*\*\*

```

=====
Acq. Operator   : 系统                               Seq. Line :    5
Acq. Instrument : HPLC-1260                           Location  :   81
Injection Date  : 8/14/2020 1:17:53 AM                 Inj       :    1
                                                    Inj Volume: 3.000 µl
Different Inj Volume from Sample Entry! Actual Inj Volume : 0.200 µl
Acq. Method     : D:\JXL\20200813\YH 2020-08-13 23-35-04\01 PA-20-0.8-1-6-220-JXL.M
Last changed    : 8/13/2020 11:36:14 PM by 系统
Analysis Method : E:\DATA\20201027\LC 2020-12-15 14-02-17\61 PA_10_0.8_3.M (Sequence Method)
Last changed    : 12/15/2020 7:42:23 PM by SYSTEM
                (modified after loading)
Additional Info : Peak(s) manually integrated
  
```

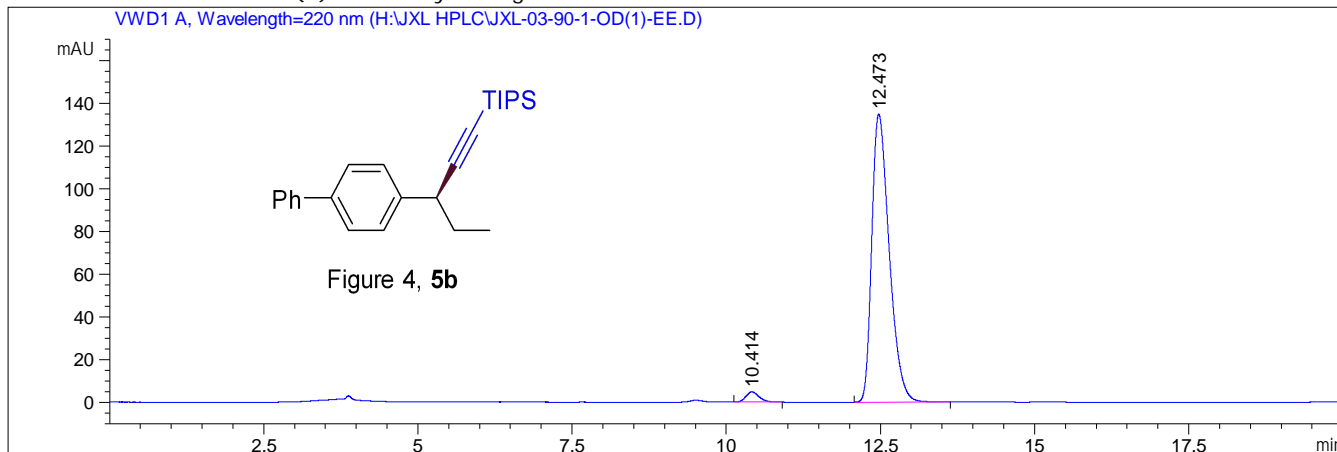

=====  
 Area Percent Report  
 =====

```

Sorted By      :      Signal
Multiplier     :      1.0000
Dilution       :      1.0000
Do not use Multiplier & Dilution Factor with ISTDs
  
```

Signal 1: VWD1 A, Wavelength=220 nm

| Peak # | RetTime [min] | Type | Width [min] | Area [mAU*s] | Height [mAU] | Area %  |
|--------|---------------|------|-------------|--------------|--------------|---------|
| 1      | 10.414        | BB   | 0.2247      | 71.15249     | 4.80578      | 2.6157  |
| 2      | 12.473        | BB   | 0.3011      | 2649.05762   | 134.92877    | 97.3843 |

Totals :                      2720.21011   139.73455

=====  
 \*\*\* End of Report \*\*\*

=====  
Acq. Operator : 系统 Seq. Line : 11  
Acq. Instrument : HPLC-1260 Location : 85  
Injection Date : 8/17/2020 3:32:40 PM Inj : 1  
Inj Volume : 3.000 µl  
Different Inj Volume from Sample Entry! Actual Inj Volume : 0.200 µl  
Acq. Method : D:\JXL\20200817\YH 2020-08-17 08-55-41\01 PA-40-0.8-1-2-220-JXL.M  
Last changed : 8/17/2020 3:53:54 PM by 系统  
(modified after loading)  
Analysis Method : C:\CHEM32\1\METHODS\151 PA\_30\_8\_4.M  
Last changed : 12/18/2020 9:34:33 PM by SYSTEM  
(modified after loading)

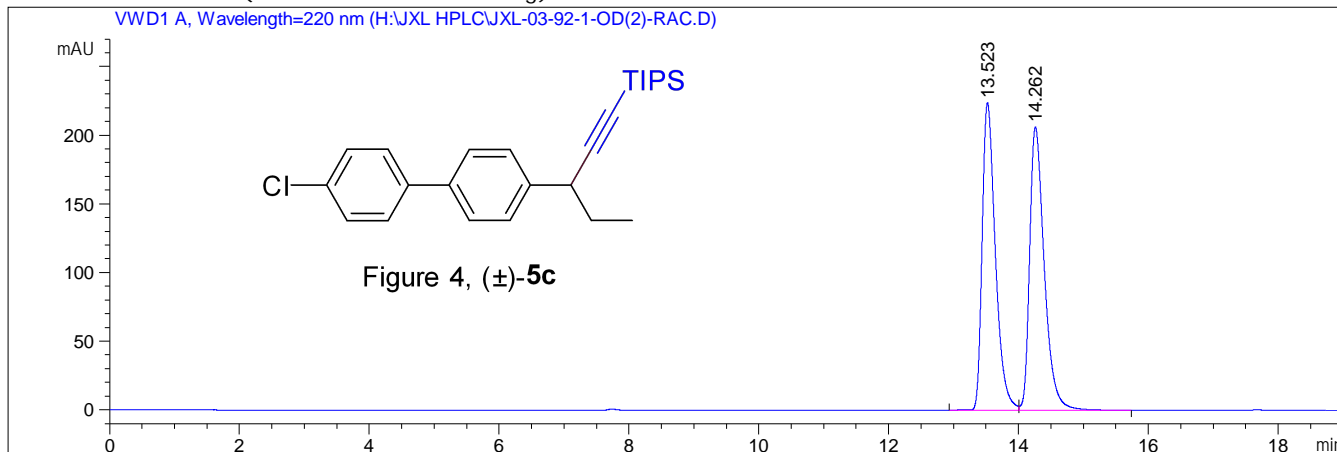

=====  
Area Percent Report  
=====

Sorted By : Signal  
Multiplier : 1.0000  
Dilution : 1.0000  
Do not use Multiplier & Dilution Factor with ISTDs

Signal 1: VWD1 A, Wavelength=220 nm

| Peak # | RetTime [min] | Type | Width [min] | Area [mAU*s] | Height [mAU] | Area %  |
|--------|---------------|------|-------------|--------------|--------------|---------|
| 1      | 13.523        | WR   | 0.2158      | 3176.07349   | 224.10931    | 49.4844 |
| 2      | 14.262        | VB   | 0.2387      | 3242.26465   | 206.43098    | 50.5156 |

Totals : 6418.33813 430.54030

=====  
\*\*\* End of Report \*\*\*

=====

|                                                                      |                                                                              |            |            |
|----------------------------------------------------------------------|------------------------------------------------------------------------------|------------|------------|
| Acq. Operator                                                        | : 系统                                                                         | Seq. Line  | : 11       |
| Acq. Instrument                                                      | : HPLC-1260                                                                  | Location   | : 83       |
| Injection Date                                                       | : 8/26/2020 1:43:16 PM                                                       | Inj        | : 1        |
|                                                                      |                                                                              | Inj Volume | : 3.000 µl |
| Different Inj Volume from Sample Entry! Actual Inj Volume : 0.300 µl |                                                                              |            |            |
| Acq. Method                                                          | : D:\JXL\20200826\YH 2020-08-26 09-02-52\01 PA-40-0.8-1-2-220-JXL.M          |            |            |
| Last changed                                                         | : 8/26/2020 1:59:25 PM by 系统<br>(modified after Loading)                     |            |            |
| Analysis Method                                                      | : E:\DATA\20201027\LC 2020-12-15 14-02-17\61 PA_10_0.8_3.M (Sequence Method) |            |            |
| Last changed                                                         | : 12/15/2020 7:29:52 PM by SYSTEM<br>(modified after Loading)                |            |            |

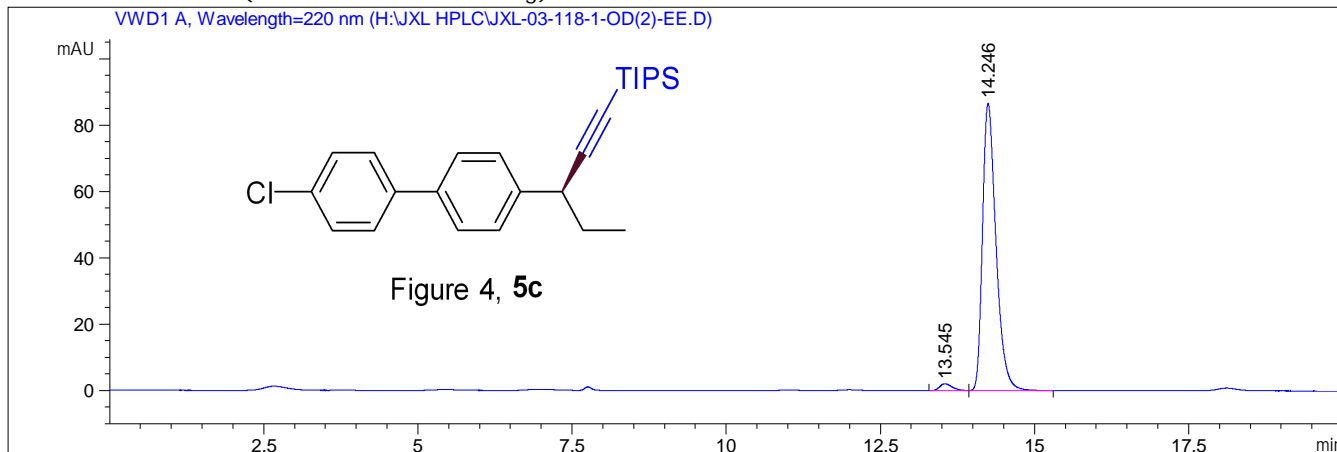

=====  
Area Percent Report  
=====

Sorted By : Signal  
Multiplier : 1.0000  
Dilution : 1.0000  
Do not use Multiplier & Dilution Factor with ISTDs

Signal 1: VWD1 A, Wavelength=220 nm

| Peak # | RetTime [min] | Type | Width [min] | Area [mAU*s] | Height [mAU] | Area %  |
|--------|---------------|------|-------------|--------------|--------------|---------|
| 1      | 13.545        | BB   | 0.1861      | 29.73621     | 2.10822      | 2.2080  |
| 2      | 14.246        | BB   | 0.2312      | 1317.04065   | 86.69881     | 97.7920 |

Totals : 1346.77686 88.80703

=====  
\*\*\* End of Report \*\*\*  
=====



=====

|                                                                                    |                       |
|------------------------------------------------------------------------------------|-----------------------|
| Acq. Operator : 系统                                                                 | Seq. Line : 42        |
| Acq. Instrument : HPLC-1260                                                        | Location : 77         |
| Injection Date : 12/13/2020 8:10:48 PM                                             | Inj : 1               |
|                                                                                    | Inj Volume : 3.000 µl |
| Different Inj Volume from Sample Entry! Actual Inj Volume : 0.500 µl               |                       |
| Acq. Method : D:\G527\FZ\20201127\YH 2020-12-12 20-24-28\01PA-30-0.5-1-6-220-JXL.M |                       |
| Last changed : 12/13/2020 8:31:37 PM by 系统                                         |                       |
| (modified after loading)                                                           |                       |
| Analysis Method : C:\CHEM32\1\METHODS\151PA_30_8_4.M                               |                       |
| Last changed : 12/18/2020 9:36:51 PM by SYSTEM                                     |                       |
| (modified after loading)                                                           |                       |

Additional Info : Peak(s) manually integrated

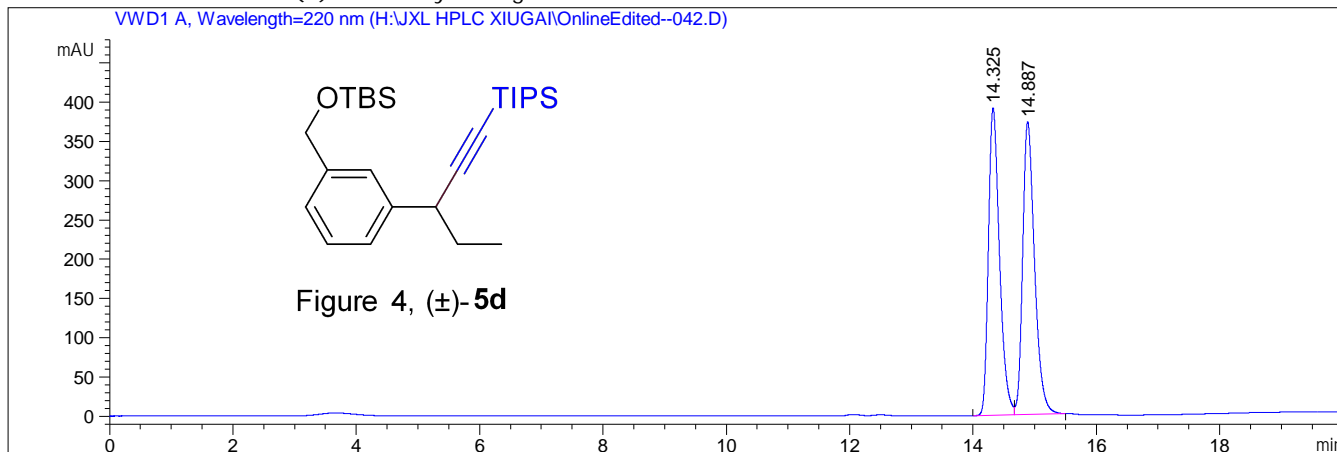

=====  
Area Percent Report  
=====

Sorted By : Signal  
Multiplier : 1.0000  
Dilution : 1.0000  
Do not use Multiplier & Dilution Factor with ISTDs

Signal 1: VWD1 A, Wavelength=220 nm

| Peak # | RetTime [min] | Type | Width [min] | Area [mAU*s] | Height [mAU] | Area %  |
|--------|---------------|------|-------------|--------------|--------------|---------|
| 1      | 14.325        | BV   | 0.1908      | 4898.95654   | 392.01218    | 49.5196 |
| 2      | 14.887        | VB   | 0.2036      | 4994.00635   | 373.24091    | 50.4804 |

Totals :                      9892.96289   765.25308

=====  
\*\*\* End of Report \*\*\*

```

=====
Acq. Operator   : 系统                               Seq. Line :   43
Acq. Instrument : HPLC-1260                           Location  :    78
Injection Date  : 12/13/2020 8:33:02 PM                Inj       :    1
                                                    Inj Volume: 3.000 µl
Different Inj Volume from Sample Entry! Actual Inj Volume : 0.700 µl
Acq. Method     : D:\G527\FZ\20201127\YH 2020-12-12 20-24-28\01PA-30-0.5-1-6-220-JXL.M
Last changed    : 12/13/2020 8:31:37 PM by 系统
Analysis Method : E:\DATA\20201027\LC 2020-12-16 12-53-00\81PA_38_0.8_3.M (Sequence Method)
Last changed    : 12/16/2020 9:48:22 PM by SYSTEM
                (modified after loading)
Additional Info : Peak(s) manually integrated
  
```

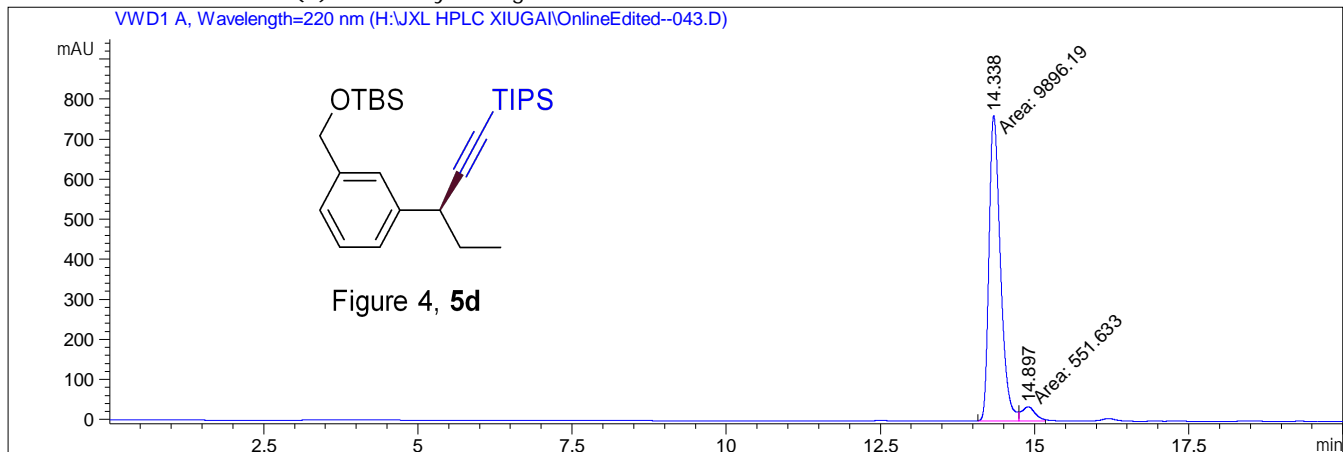

=====  
 Area Percent Report  
 =====

```

Sorted By      :      Signal
Multiplier     :      1.0000
Dilution      :      1.0000
Do not use Multiplier & Dilution Factor with ISTDs
  
```

Signal 1: VWD1 A, Wavelength=220 nm

| Peak # | RetTime [min] | Type | Width [min] | Area [mAU*s] | Height [mAU] | Area %  |
|--------|---------------|------|-------------|--------------|--------------|---------|
| 1      | 14.338        | FM   | 0.2162      | 9896.19434   | 763.04950    | 94.7201 |
| 2      | 14.897        | MF   | 0.2551      | 551.63306    | 36.04580     | 5.2799  |

Totals :                    1.04478e4    799.09530

=====  
 \*\*\* End of Report \*\*\*

```

=====
Acq. Operator   : 系统                               Seq. Line : 223
Acq. Instrument : HPLC-1260                          Location  : 81
Injection Date  : 12/17/2020 10:38:06 AM             Inj       : 1
                                                    Inj Volume: 3.000 µl
Different Inj Volume from Sample Entry! Actual Inj Volume : 2.000 µl
Acq. Method     : D:\G527\FZ\20201127\YH 2020-12-12 20-24-28\OIPA-30-0.5-1-6-220-JXL.M
Last changed    : 12/14/2020 9:39:45 AM by 系统
Analysis Method : E:\DATA\20201027\LC 2020-11-27 14-40-53\1EtOH-40-0.8-3-220-XYH.M (Sequence
Method)
Last changed    : 12/17/2020 11:25:28 PM by SYSTEM
(modified after loading)
Additional Info : Peak(s) manually integrated
  
```

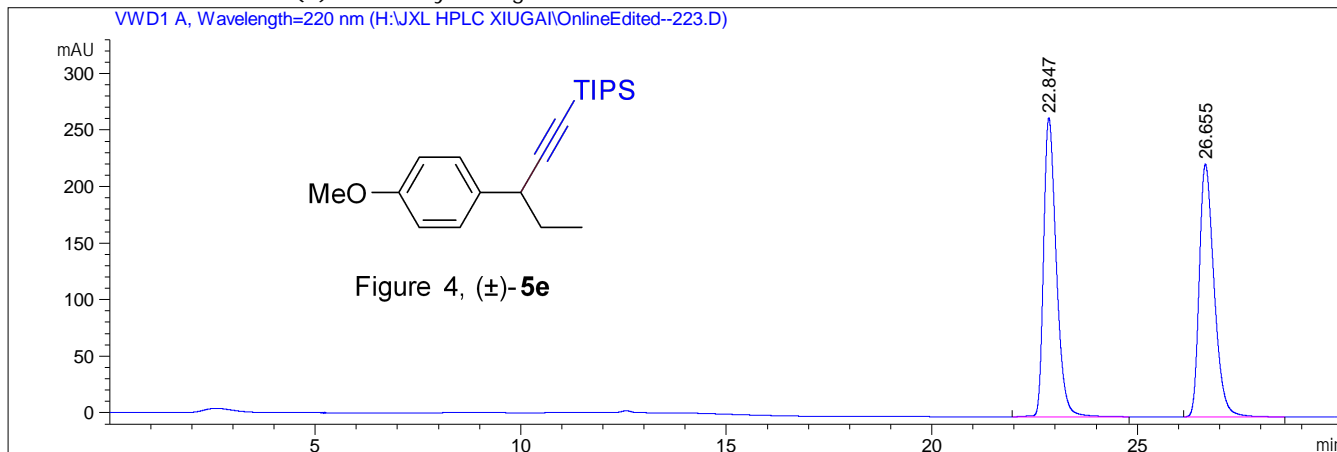

=====  
 Area Percent Report  
 =====

```

Sorted By      :      Signal
Multiplier     :      1.0000
Dilution       :      1.0000
Do not use Multiplier & Dilution Factor with ISTDs
  
```

Signal 1: VWD1 A, Wavelength=220 nm

| Peak # | RetTime [min] | Type | Width [min] | Area [mAU*s] | Height [mAU] | Area %  |
|--------|---------------|------|-------------|--------------|--------------|---------|
| 1      | 22.847        | BB   | 0.3280      | 5665.40869   | 264.39789    | 50.3487 |
| 2      | 26.655        | BB   | 0.3807      | 5586.92920   | 223.48183    | 49.6513 |

Totals :                      1.12523e4    487.87971

=====  
 \*\*\* End of Report \*\*\*

```
=====
Acq. Operator   : 系统                      Seq. Line : 224
Acq. Instrument : HPLC-1260                 Location  : 79
Injection Date  : 12/17/2020 11:09:29 AM   Inj       : 1
                                                    Inj Volume : 3.000 µl
Different Inj Volume from Sample Entry! Actual Inj Volume : 0.300 µl
Acq. Method     : D:\G527\FZ\20201127\YH 2020-12-12 20-24-28\01PA-30-0.5-1-6-220-JXL.M
Last changed    : 12/14/2020 9:39:45 AM by 系统
Analysis Method : E:\DATA\20201027\LC 2020-11-27 14-40-53\1EtOH-40-0.8-3-220-XYH.M (Sequence
Method)
Last changed    : 12/17/2020 11:26:08 PM by SYSTEM
                (modified after loading)
=====
```

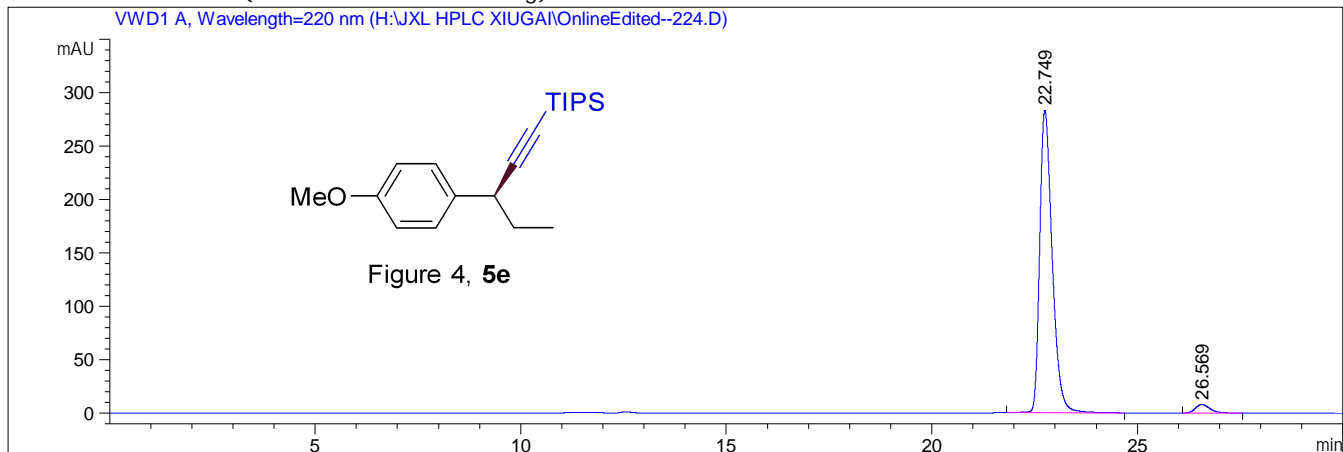

=====  
Area Percent Report  
=====

```
Sorted By      : Signal
Multiplier     : 1.0000
Dilution       : 1.0000
Do not use Multiplier & Dilution Factor with ISTDs
```

Signal 1: VWD1 A, Wavelength=220 nm

| Peak # | RetTime [min] | Type | Width [min] | Area [mAU*s] | Height [mAU] | Area %  |
|--------|---------------|------|-------------|--------------|--------------|---------|
| 1      | 22.749        | BB   | 0.3245      | 5984.18018   | 283.18457    | 96.8689 |
| 2      | 26.569        | BB   | 0.3349      | 193.42569    | 7.92140      | 3.1311  |

Totals :                    6177.60587  291.10598

=====  
\*\*\* End of Report \*\*\*

=====  
Acq. Operator : 系统 Seq. Line : 4  
Acq. Instrument : HPLC-1260 Location : 81  
Injection Date : 8/17/2020 10:26:59 AM Inj : 1  
Inj Volume : 3.000 µl  
Different Inj Volume from Sample Entry! Actual Inj Volume : 0.200 µl  
Acq. Method : D:\JXL\20200817\YH 2020-08-17 08-55-41\01 PA-40-0.8-1-2-220-JXL.M  
Last changed : 8/17/2020 10:49:51 AM by 系统  
(modified after loading)  
Analysis Method : C:\CHEM32\1\METHODS\151 PA\_30\_8\_4.M  
Last changed : 12/18/2020 9:38:07 PM by SYSTEM  
(modified after loading)

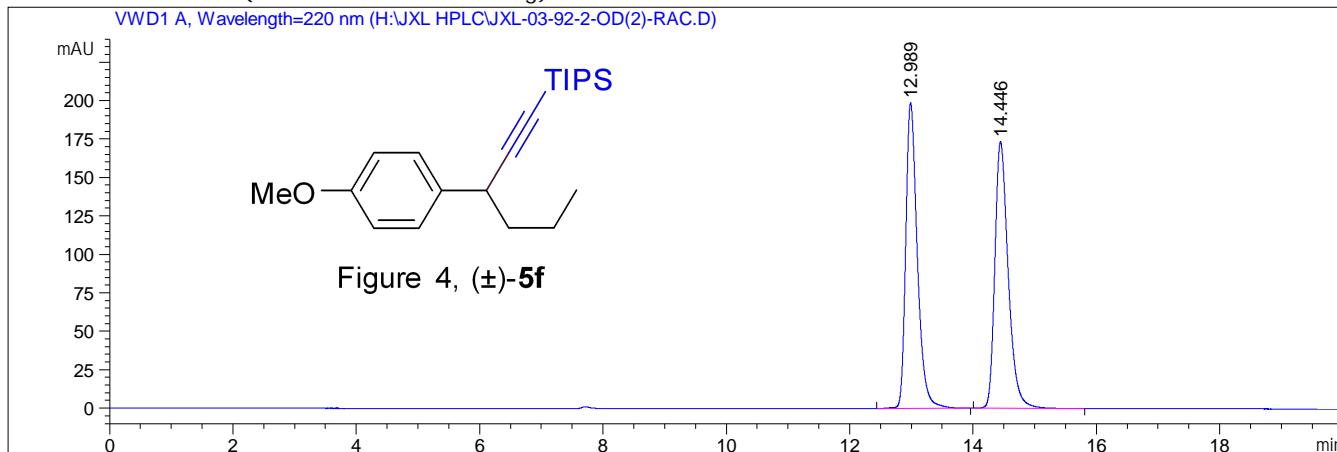

=====  
Area Percent Report  
=====

Sorted By : Signal  
Multiplier : 1.0000  
Dilution : 1.0000  
Do not use Multiplier & Dilution Factor with ISTDs

Signal 1: VWD1 A, Wavelength=220 nm

| Peak # | RetTime [min] | Type | Width [min] | Area [mAU*s] | Height [mAU] | Area %  |
|--------|---------------|------|-------------|--------------|--------------|---------|
| 1      | 12.989        | BB   | 0.1981      | 2590.69507   | 198.68257    | 49.8213 |
| 2      | 14.446        | BB   | 0.2291      | 2609.28149   | 173.36870    | 50.1787 |

Totals : 5199.97656 372.05127

=====  
\*\*\* End of Report \*\*\*

=====  
Acq. Operator : 系统 Seq. Line : 28  
Acq. Instrument : HPLC-1260 Location : 95  
Injection Date : 8/22/2020 12:54:36 AM Inj : 2  
Inj Volume : 3.000 µl  
Different Inj Volume from Sample Entry! Actual Inj Volume : 0.300 µl  
Acq. Method : D:\YH\20200820\YH 2020-08-21 08-21-12\01PA-20-0.8-1-6-220-JXL.M  
Last changed : 8/21/2020 11:21:53 PM by 系统  
Analysis Method : E:\DATA\20201027\LC 2020-12-15 14-02-17\61PA\_10\_0.8\_3.M (Sequence Method)  
Last changed : 12/15/2020 8:19:17 PM by SYSTEM  
(modified after Loading)

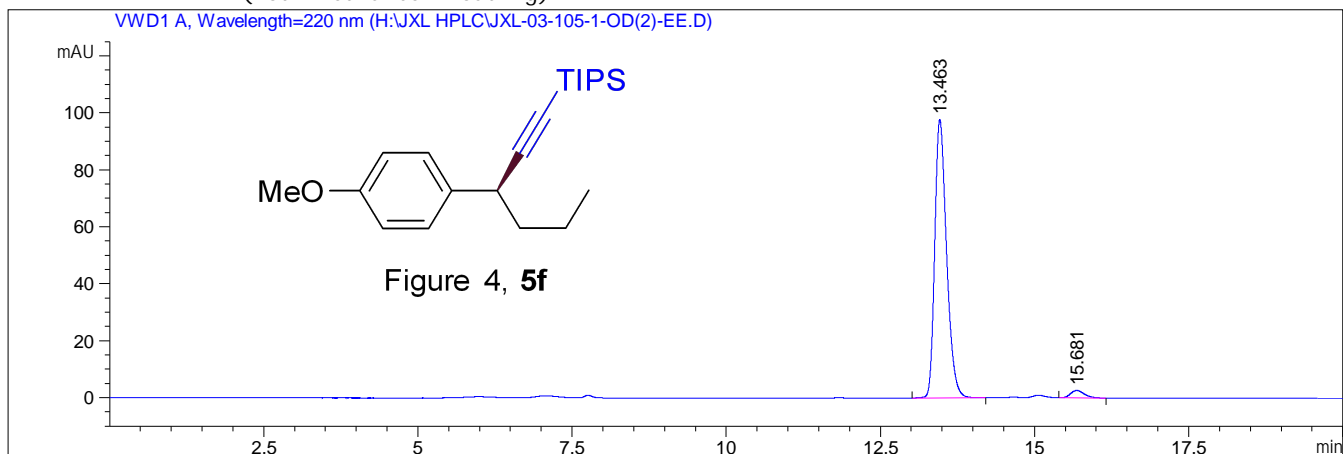

=====  
Area Percent Report  
=====

Sorted By : Signal  
Multiplier : 1.0000  
Dilution : 1.0000  
Do not use Multiplier & Dilution Factor with ISTDs

Signal 1: VWD1 A, Wavelength=220 nm

| Peak # | RetTime [min] | Type | Width [min] | Area [mAU*s] | Height [mAU] | Area %  |
|--------|---------------|------|-------------|--------------|--------------|---------|
| 1      | 13.463        | BB   | 0.2036      | 1303.97400   | 97.74081     | 96.9901 |
| 2      | 15.681        | BB   | 0.2027      | 40.46679     | 2.62005      | 3.0099  |

Totals : 1344.44079 100.36086

=====  
\*\*\* End of Report \*\*\*



=====

|                                        |                       |
|----------------------------------------|-----------------------|
| Acq. Operator : 系统                     | Seq. Line : 21        |
| Acq. Instrument : HPLC-1260            | Location : 82         |
| Injection Date : 12/13/2020 5:02:26 AM | Inj : 1               |
|                                        | Inj Volume : 3.000 µl |

Different Inj Volume from Sample Entry! Actual Inj Volume : 1.000 µl

Acq. Method : D:\G527\FZ\20201127\YH 2020-12-12 20-24-28\01PA-30-0.8-1-6-220-JXL.M

Last changed : 12/13/2020 4:39:41 AM by 系统

Analysis Method : E:\DATA\20201027\LC 2020-11-24 17-29-49\11PA-40-0.5-220-3-JXL.M (Sequence Method)

Last changed : 12/16/2020 11:27:48 AM by SYSTEM  
(modified after loading)

Additional Info : Peak(s) manually integrated

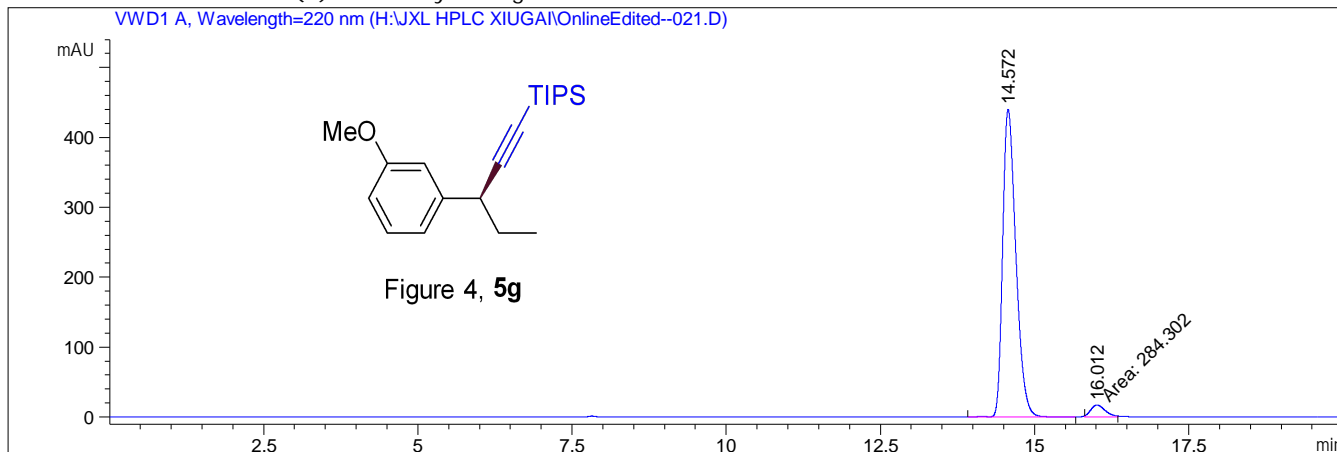

=====  
Area Percent Report  
=====

Sorted By : Signal  
Multiplier : 1.0000  
Dilution : 1.0000  
Do not use Multiplier & Dilution Factor with ISTDs

Signal 1: VWD1 A, Wavelength=220 nm

| Peak # | RetTime [min] | Type | Width [min] | Area [mAU*s] | Height [mAU] | Area %  |
|--------|---------------|------|-------------|--------------|--------------|---------|
| 1      | 14.572        | VB R | 0.2298      | 6559.40625   | 440.30060    | 95.8458 |
| 2      | 16.012        | FM   | 0.2754      | 284.30161    | 17.20478     | 4.1542  |

Totals :                      6843.70786   457.50538

=====  
\*\*\* End of Report \*\*\*



=====  
Acq. Operator : 系统 Seq. Line : 165  
Acq. Instrument : HPLC-1260 Location : 96  
Injection Date : 9/18/2020 3:32:54 AM Inj : 2  
Inj Volume : 3.000 µl  
Different Inj Volume from Sample Entry! Actual Inj Volume : 0.300 µl  
Acq. Method : D:\G527\FZ\20200822\YH 2020-09-15 11-31-01\01PA-30-0.5-1-6-220-JXL.M  
Last changed : 9/17/2020 11:59:29 PM by 系统  
Analysis Method : E:\DATA\20201027\LC 2020-12-15 14-02-17\61PA\_10\_0.8\_3.M (Sequence Method)  
Last changed : 12/15/2020 8:25:11 PM by SYSTEM  
(modified after loading)  
Additional Info : Peak(s) manually integrated

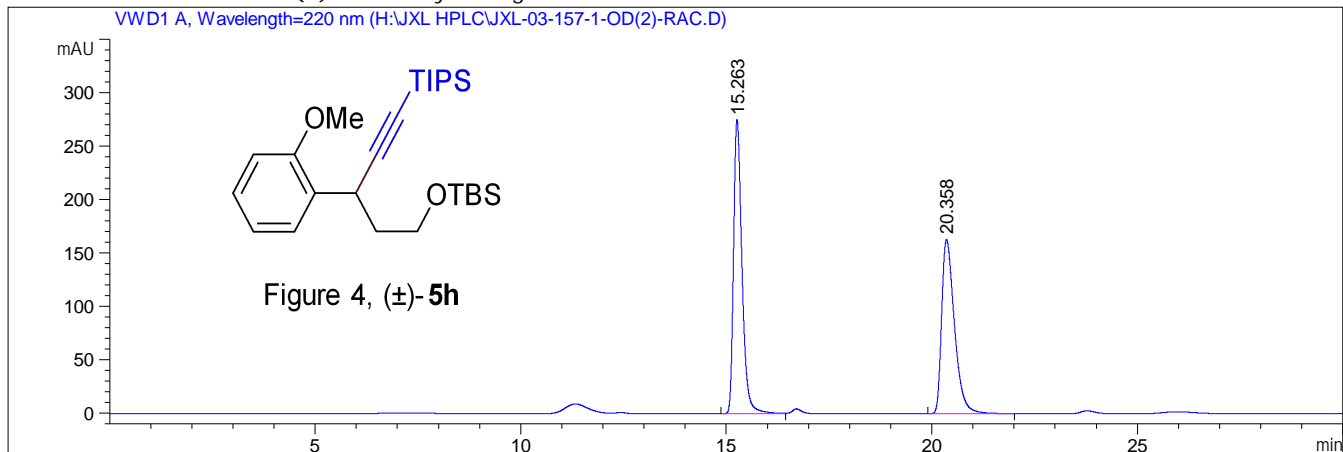

=====  
Area Percent Report  
=====

Sorted By : Signal  
Multiplier : 1.0000  
Dilution : 1.0000  
Do not use Multiplier & Dilution Factor with ISTDs

Signal 1: VWD1 A, Wavelength=220 nm

| Peak # | RetTime [min] | Type | Width [min] | Area [mAU*s] | Height [mAU] | Area %  |
|--------|---------------|------|-------------|--------------|--------------|---------|
| 1      | 15.263        | BB   | 0.2178      | 3914.83374   | 275.44077    | 52.5555 |
| 2      | 20.358        | BB   | 0.3282      | 3534.11255   | 163.15683    | 47.4445 |

Totals : 7448.94629 438.59760

=====  
\*\*\* End of Report \*\*\*  
=====

=====

|                                                                                              |                          |
|----------------------------------------------------------------------------------------------|--------------------------|
| Acq. Operator : 系统                                                                           | Seq. Line : 39           |
| Acq. Instrument : HPLC-1260                                                                  | Location : 73            |
| Injection Date : 10/30/2020 5:15:41 AM                                                       | Inj : 1                  |
|                                                                                              | Inj Volume : 3.000 µl    |
| Different Inj Volume from Sample Entry! Actual Inj Volume : 0.300 µl                         |                          |
| Acq. Method : D:\G527\FZ\20201026\YH 2020-10-29 08-35-49\01PA-30-0.5-1-6-220-JXL.M           |                          |
| Last changed : 10/29/2020 6:19:06 PM by 系统                                                   |                          |
| Analysis Method : E:\DATA\20201027\LC 2020-12-16 12-53-00\151PA_30_0.8_4.M (Sequence Method) |                          |
| Last changed : 12/16/2020 3:05:37 PM by SYSTEM                                               |                          |
|                                                                                              | (modified after loading) |

Additional Info : Peak(s) manually integrated

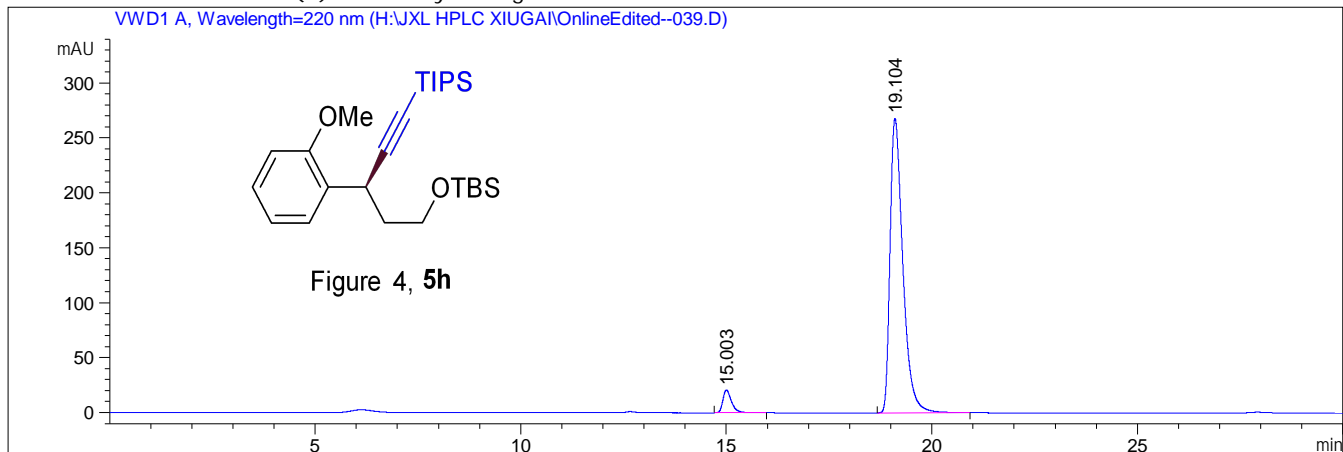

Area Percent Report

Sorted By : Signal  
 Multiplier : 1.0000  
 Dilution : 1.0000  
 Do not use Multiplier & Dilution Factor with ISTDs

Signal 1: VWD1 A, Wavelength=220 nm

| Peak # | RetTime [min] | Type | Width [min] | Area [mAU*s] | Height [mAU] | Area %  |
|--------|---------------|------|-------------|--------------|--------------|---------|
| 1      | 15.003        | BB   | 0.2210      | 303.79639    | 20.79279     | 4.9837  |
| 2      | 19.104        | BB   | 0.3307      | 5791.94336   | 267.88892    | 95.0163 |

Totals : 6095.73975 288.68170

\*\*\* End of Report \*\*\*

```

=====
Acq. Operator   : 系统                               Seq. Line :    4
Acq. Instrument : HPLC-1260                           Location  :   91
Injection Date  : 12/12/2020 9:23:04 PM                Inj       :    1
                                                    Inj Volume: 3.000 µl
Different Inj Volume from Sample Entry! Actual Inj Volume : 2.000 µl
Acq. Method     : D:\G527\FZ\20201127\YH 2020-12-12 20-24-28\11PA-20-0.5-1-6-220-JXL.M
Last changed    : 12/12/2020 9:21:20 PM by 系统
Analysis Method : E:\DATA\20201027\LC 2020-12-15 14-02-17\61PA_10_0.8_3.M (Sequence Method)
Last changed    : 12/15/2020 8:38:05 PM by SYSTEM
                (modified after loading)
Additional Info : Peak(s) manually integrated
  
```

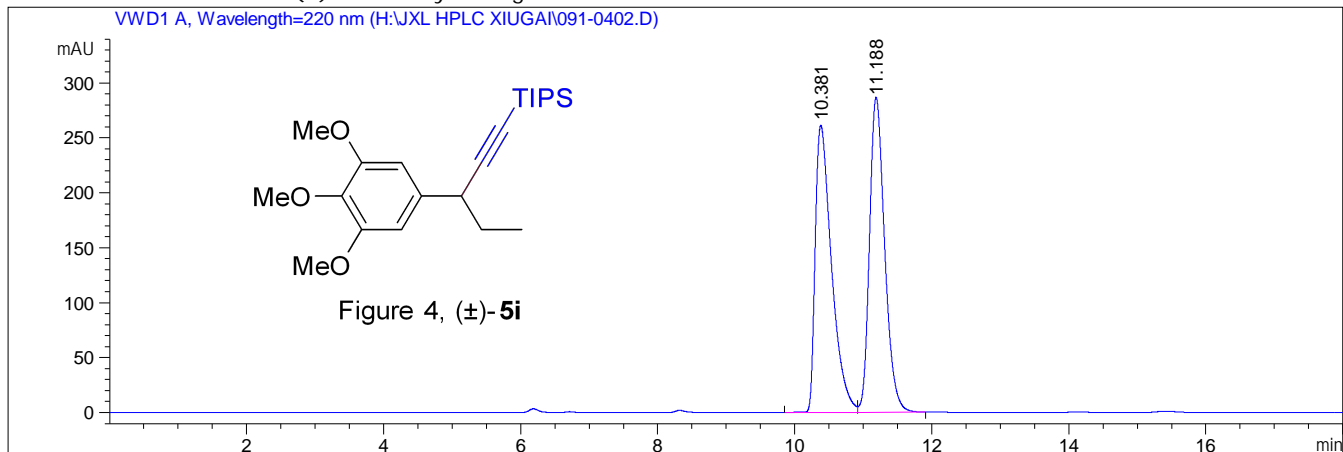

=====  
 Area Percent Report  
 =====

```

Sorted By      :      Signal
Multiplier     :      1.0000
Dilution      :      1.0000
Do not use Multiplier & Dilution Factor with ISTDs
  
```

Signal 1: VWD1 A, Wavelength=220 nm

| Peak # | RetTime [min] | Type | Width [min] | Area [mAU*s] | Height [mAU] | Area %  |
|--------|---------------|------|-------------|--------------|--------------|---------|
| 1      | 10.381        | W R  | 0.2500      | 4336.35254   | 261.50546    | 49.5476 |
| 2      | 11.188        | VB   | 0.2371      | 4415.54150   | 286.78824    | 50.4524 |

Totals :                    8751.89404   548.29370

=====  
 \*\*\* End of Report \*\*\*

```

=====
Acq. Operator   : 系统                               Seq. Line :    5
Acq. Instrument : HPLC-1260                          Location  :   92
Injection Date  : 12/12/2020 9:42:29 PM              Inj       :    1
                                                    Inj Volume: 3.000 µl
Different Inj Volume from Sample Entry! Actual Inj Volume : 0.800 µl
Acq. Method     : D:\G527\FZ\20201127\YH 2020-12-12 20-24-28\1PA-20-0.5-1-6-220-JXL.M
Last changed    : 12/12/2020 10:04:54 PM by 系统
                  (modified after loading)
Analysis Method : C:\CHEM32\1\METHODS\151PA_30_8_4.M
Last changed    : 12/18/2020 9:40:44 PM by SYSTEM
                  (modified after loading)
Additional Info : Peak(s) manually integrated
  
```

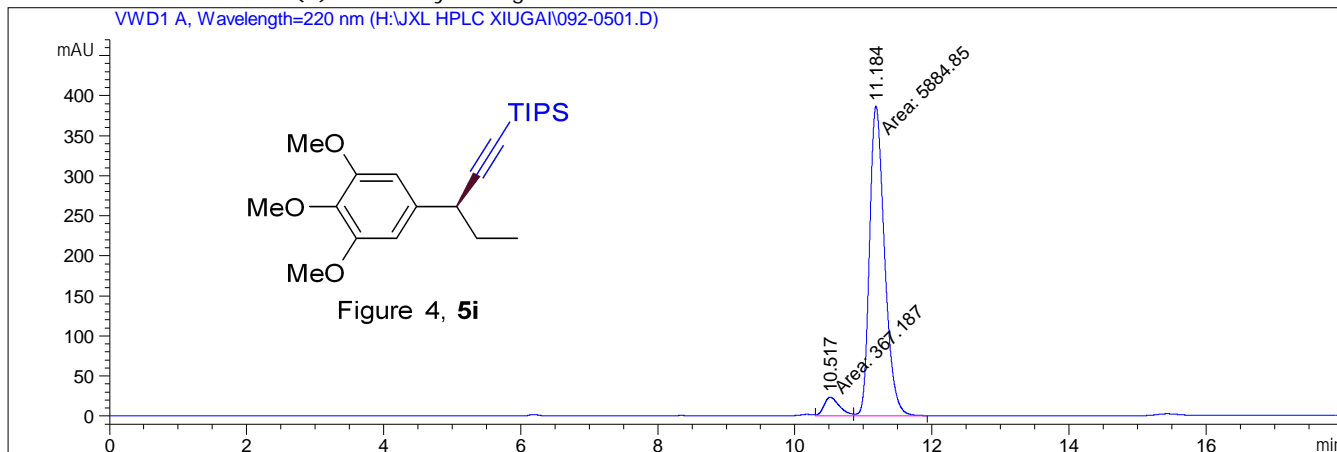

Area Percent Report

```

Sorted By      :      Signal
Multiplier     :      1.0000
Dilution       :      1.0000
Do not use Multiplier & Dilution Factor with ISTDs
  
```

Signal 1: VWD1 A, Wavelength=220 nm

| Peak # | RetTime [min] | Type | Width [min] | Area [mAU*s] | Height [mAU] | Area %  |
|--------|---------------|------|-------------|--------------|--------------|---------|
| 1      | 10.517        | MF   | 0.2625      | 367.18674    | 23.31229     | 5.8731  |
| 2      | 11.184        | FM   | 0.2538      | 5884.84668   | 386.49524    | 94.1269 |

Totals :                      6252.03342   409.80753

\*\*\* End of Report \*\*\*

=====

|                                       |                       |
|---------------------------------------|-----------------------|
| Acq. Operator : 系统                    | Seq. Line : 34        |
| Acq. Instrument : HPLC-1260           | Location : 81         |
| Injection Date : 8/16/2020 6:01:09 AM | Inj : 1               |
|                                       | Inj Volume : 3.000 µl |

Different Inj Volume from Sample Entry! Actual Inj Volume : 0.500 µl

|                                                                                             |
|---------------------------------------------------------------------------------------------|
| Acq. Method : D:\G527\FZ\20200814\YH 2020-08-15 15-49-29\01PA-40-0.3-1-2-220-JXL.M          |
| Last changed : 8/15/2020 10:39:12 PM by 系统                                                  |
| Analysis Method : E:\DATA\20201027\LC 2020-12-15 14-02-17\61PA_10_0.8_3.M (Sequence Method) |
| Last changed : 12/15/2020 8:43:43 PM by SYSTEM<br>(modified after loading)                  |

Additional Info : Peak(s) manually integrated

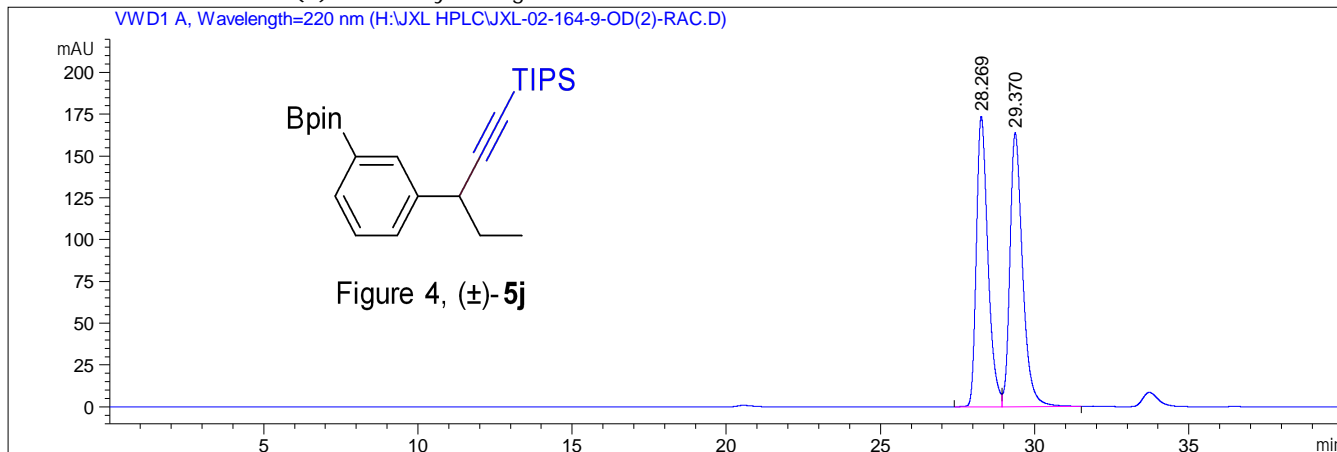

=====  
Area Percent Report  
=====

|            |   |        |
|------------|---|--------|
| Sorted By  | : | Signal |
| Multiplier | : | 1.0000 |
| Dilution   | : | 1.0000 |

Do not use Multiplier & Dilution Factor with ISTDs

Signal 1: VWD1 A, Wavelength=220 nm

| Peak # | RetTime [min] | Type | Width [min] | Area [mAU*s] | Height [mAU] | Area %  |
|--------|---------------|------|-------------|--------------|--------------|---------|
| 1      | 28.269        | BV   | 0.3981      | 4526.81055   | 173.69307    | 49.1311 |
| 2      | 29.370        | VB   | 0.4353      | 4686.92578   | 163.81421    | 50.8689 |

Totals :                      9213.73633   337.50728

=====  
\*\*\* End of Report \*\*\*

=====  
 Acq. Operator : 系统 Seq. Line : 35  
 Acq. Instrument : HPLC-1260 Location : 85  
 Injection Date : 8/16/2020 6:42:35 AM Inj : 1  
 Inj Volume : 3.000 µl  
 Different Inj Volume from Sample Entry! Actual Inj Volume : 0.300 µl  
 Acq. Method : D:\G527\FZ\20200814\YH 2020-08-15 15-49-29\01PA-40-0.3-1-2-220-JXL.M  
 Last changed : 8/15/2020 10:39:12 PM by 系统  
 Analysis Method : E:\DATA\20201027\LC 2020-12-15 14-02-17\61PA\_10\_0.8\_3.M (Sequence Method)  
 Last changed : 12/15/2020 8:44:39 PM by SYSTEM  
 (modified after loading)  
 Additional Info : Peak(s) manually integrated

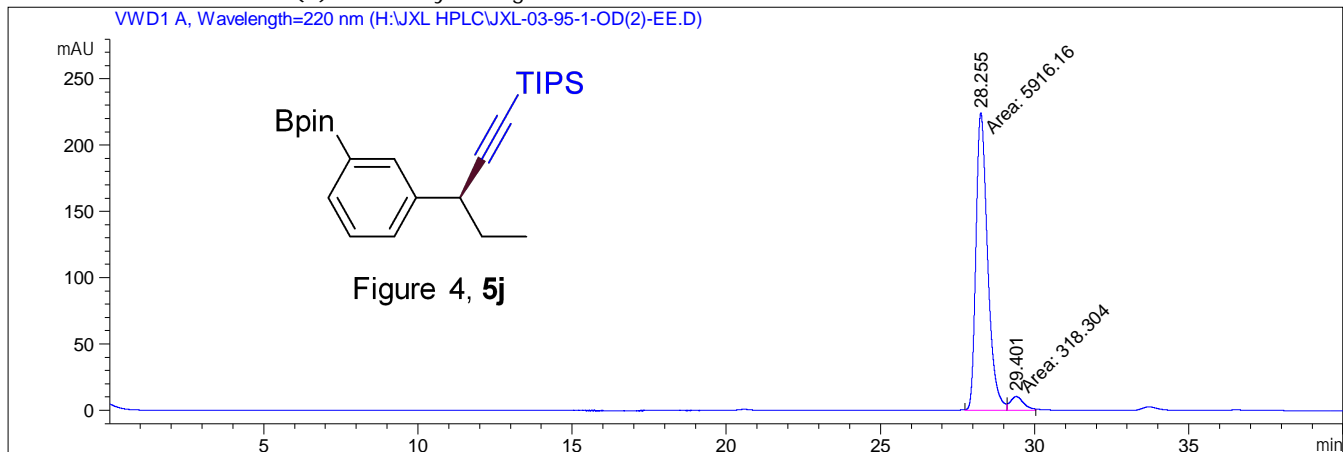

=====  
 Area Percent Report  
 =====

Sorted By : Signal  
 Multiplier : 1.0000  
 Dilution : 1.0000  
 Do not use Multiplier & Dilution Factor with ISTDs

Signal 1: VWD1 A, Wavelength=220 nm

| Peak # | RetTime [min] | Type | Width [min] | Area [mAU*s] | Height [mAU] | Area %  |
|--------|---------------|------|-------------|--------------|--------------|---------|
| 1      | 28.255        | MF   | 0.4394      | 5916.15869   | 224.40263    | 94.8945 |
| 2      | 29.401        | MF   | 0.5088      | 318.30356    | 10.42563     | 5.1055  |

Totals :                      6234.46225   234.82827

=====  
 \*\*\* End of Report \*\*\*  
 =====

```

=====
Acq. Operator   : 系统                               Seq. Line :   59
Acq. Instrument : HPLC-1260                           Location  :   84
Injection Date  : 9/22/2020 6:09:20 PM                 Inj       :    1
                                                    Inj Volume: 3.000 µl
Different Inj Volume from Sample Entry! Actual Inj Volume : 0.300 µl
Acq. Method    : D:\G527\FZ\20200822\YH 2020-09-21 18-04-54\01PA-35-0.3-1-6-220-JXL.M
Last changed   : 9/22/2020 5:03:45 PM by 系统
Analysis Method : E:\DATA\20201027\LC 2020-12-15 14-02-17\61PA_10_0.8_3.M (Sequence Method)
Last changed   : 12/15/2020 8:47:09 PM by SYSTEM
                (modified after loading)
Additional Info : Peak(s) manually integrated
  
```

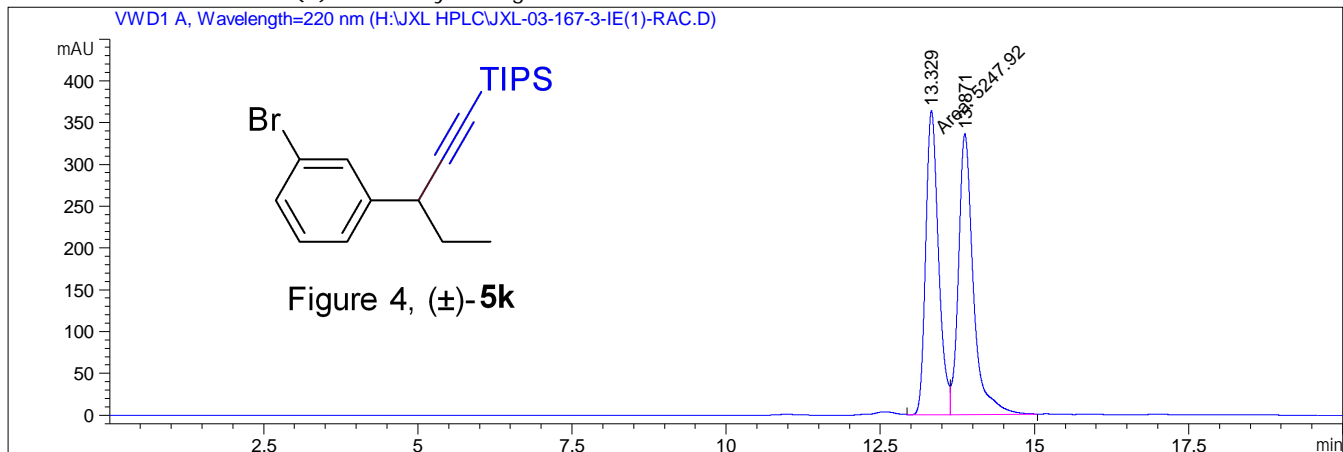

=====  
 Area Percent Report  
 =====

```

Sorted By      :      Signal
Multiplier     :      1.0000
Dilution       :      1.0000
Do not use Multiplier & Dilution Factor with ISTDs
  
```

Signal 1: VWD1 A, Wavelength=220 nm

| Peak # | RetTime [min] | Type | Width [min] | Area [mAU*s] | Height [mAU] | Area %  |
|--------|---------------|------|-------------|--------------|--------------|---------|
| 1      | 13.329        | FM   | 0.2407      | 5247.91748   | 363.43359    | 48.2757 |
| 2      | 13.871        | VB   | 0.2509      | 5622.79443   | 335.64539    | 51.7243 |

Totals :                    1.08707e4    699.07898

=====  
 \*\*\* End of Report \*\*\*

```
=====
Acq. Operator   : 系统                               Seq. Line :   56
Acq. Instrument : HPLC-1260                           Location  :   85
Injection Date  : 9/22/2020 5:05:09 PM                 Inj       :    1
                                                    Inj Volume: 3.000 µl
Different Inj Volume from Sample Entry! Actual Inj Volume : 0.500 µl
Acq. Method    : D:\G527\FZ\20200822\YH 2020-09-21 18-04-54\01PA-35-0.3-1-6-220-JXL.M
Last changed   : 9/22/2020 5:03:45 PM by 系统
Analysis Method : E:\DATA\20201027\LC 2020-12-15 14-02-17\61PA_10_0.8_3.M (Sequence Method)
Last changed   : 12/15/2020 8:48:19 PM by SYSTEM
                (modified after loading)
Additional Info : Peak(s) manually integrated
=====
```

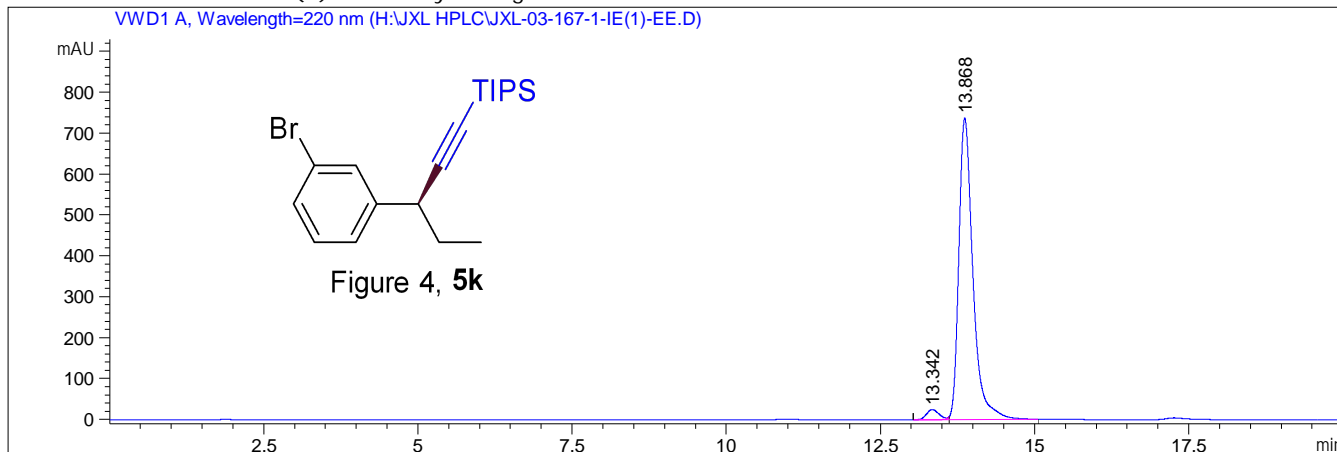

=====  
Area Percent Report  
=====

```
Sorted By      :      Signal
Multiplier     :      1.0000
Dilution      :      1.0000
Do not use Multiplier & Dilution Factor with ISTDs
```

Signal 1: VWD1 A, Wavelength=220 nm

| Peak # | RetTime [min] | Type | Width [min] | Area [mAU*s] | Height [mAU] | Area %  |
|--------|---------------|------|-------------|--------------|--------------|---------|
| 1      | 13.342        | BV E | 0.2140      | 345.04163    | 24.92293     | 2.8670  |
| 2      | 13.868        | VB R | 0.2396      | 1.16897e4    | 736.77887    | 97.1330 |

Totals : 1.20347e4 761.70180

=====  
\*\*\* End of Report \*\*\*



```
=====
Acq. Operator   : 系统                      Seq. Line :    4
Acq. Instrument : HPLC-1260                Location  :   84
Injection Date  : 8/17/2020 8:42:43 PM      Inj       :    1
                                           Inj Volume: 3.000 µl
Different Inj Volume from Sample Entry! Actual Inj Volume : 2.500 µl
Acq. Method     : D:\JXL\20200817\YH 2020-08-17 19-27-56\01 PA-40-0.5-1-2-220-JXL.M
Last changed    : 8/17/2020 9:37:40 PM by 系统
                                           (modified after Loading)
Analysis Method : E:\DATA\20201027\LC 2020-12-28 19-00-53\201 PA_20_10_3.M (Sequence Method)
Last changed    : 12/29/2020 3:26:14 PM by SYSTEM
                                           (modified after Loading)
Additional Info : Peak(s) manually integrated
=====
```

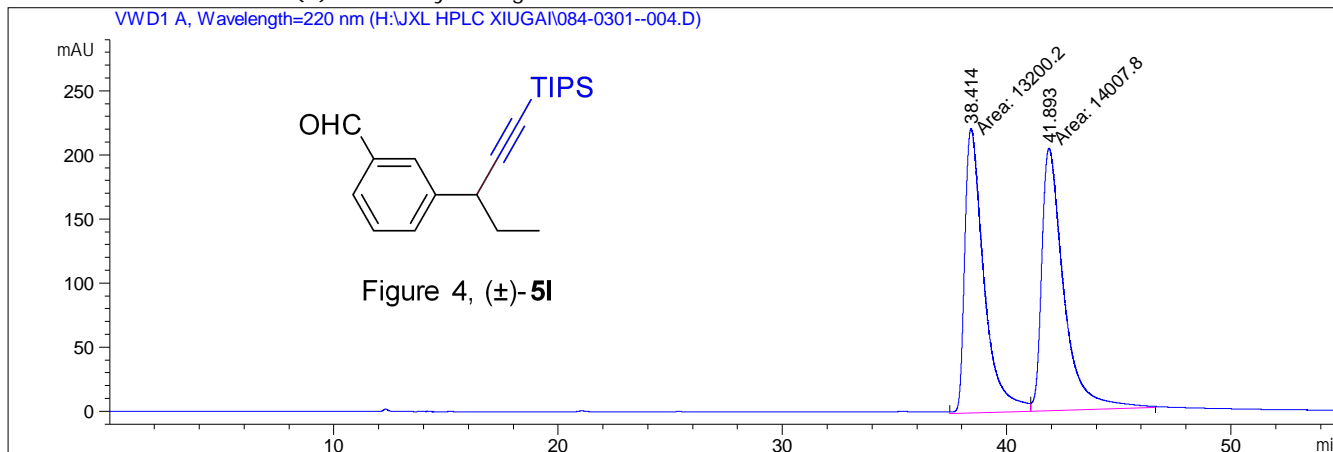

=====  
Area Percent Report  
=====

Sorted By : Signal  
Multiplier : 1.0000  
Dilution : 1.0000  
Do not use Multiplier & Dilution Factor with ISTDs

Signal 1: VWD1 A, Wavelength=220 nm

| Peak # | RetTime [min] | Type | Width [min] | Area [mAU*s] | Height [mAU] | Area %  |
|--------|---------------|------|-------------|--------------|--------------|---------|
| 1      | 38.414        | MF   | 0.9917      | 1.32002e4    | 221.85463    | 48.5158 |
| 2      | 41.893        | FM   | 1.1406      | 1.40078e4    | 204.67603    | 51.4842 |

Totals : 2.72080e4 426.53065

=====  
\*\*\* End of Report \*\*\*

=====  
 Acq. Operator : 系统 Seq. Line : 228  
 Acq. Instrument : HPLC-1260 Location : 65  
 Injection Date : 12/17/2020 12:59:39 PM Inj : 1  
 Inj Volume : 3.000 µl  
 Different Inj Volume from Sample Entry! Actual Inj Volume : 4.000 µl  
 Acq. Method : D:\G527\FZ\20201127\YH 2020-12-12 20-24-28\01PA-75-0.5-1-6-220-JXL.M  
 Last changed : 12/16/2020 10:14:40 PM by 系统  
 Analysis Method : C:\CHEM32\1\METHODS\101PA\_35\_0.8\_254\_1.M  
 Last changed : 12/29/2020 3:32:19 PM by SYSTEM  
 (modified after Loading)  
 Additional Info : Peak(s) manually integrated

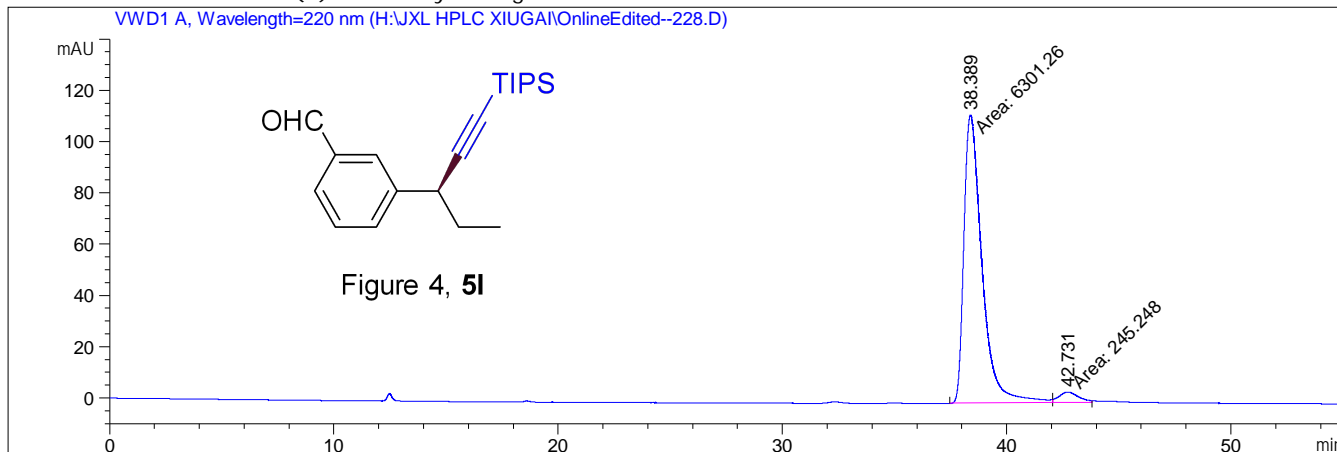

=====  
 Area Percent Report  
 =====

Sorted By : Signal  
 Multiplier : 1.0000  
 Dilution : 1.0000  
 Do not use Multiplier & Dilution Factor with ISTDs

Signal 1: VWD1 A, Wavelength=220 nm

| Peak # | RetTime [min] | Type | Width [min] | Area [mAU*s] | Height [mAU] | Area %  |
|--------|---------------|------|-------------|--------------|--------------|---------|
| 1      | 38.389        | MF   | 0.9346      | 6301.26416   | 112.37509    | 96.2538 |
| 2      | 42.731        | MF   | 1.0123      | 245.24841    | 4.03794      | 3.7462  |

Totals :                      6546.51257   116.41303

=====  
 \*\*\* End of Report \*\*\*  
 =====

=====

|                                       |                       |
|---------------------------------------|-----------------------|
| Acq. Operator : 系统                    | Seq. Line : 8         |
| Acq. Instrument : HPLC-1260           | Location : 93         |
| Injection Date : 9/5/2020 12:26:45 PM | Inj : 2               |
|                                       | Inj Volume : 3.000 µl |

Different Inj Volume from Sample Entry! Actual Inj Volume : 0.600 µl

|                                                                                              |
|----------------------------------------------------------------------------------------------|
| Acq. Method : D:\JXL\20200905\YH 2020-09-05 08-53-26\01PA-50-0.5-1-6-220-JXL.M               |
| Last changed : 9/5/2020 11:44:07 AM by 系统                                                    |
| Analysis Method : E:\DATA\20201027\LC 2020-12-16 12-53-00\151PA_30_0.8_4.M (Sequence Method) |
| Last changed : 12/16/2020 3:20:04 PM by SYSTEM                                               |

(modified after Loading)

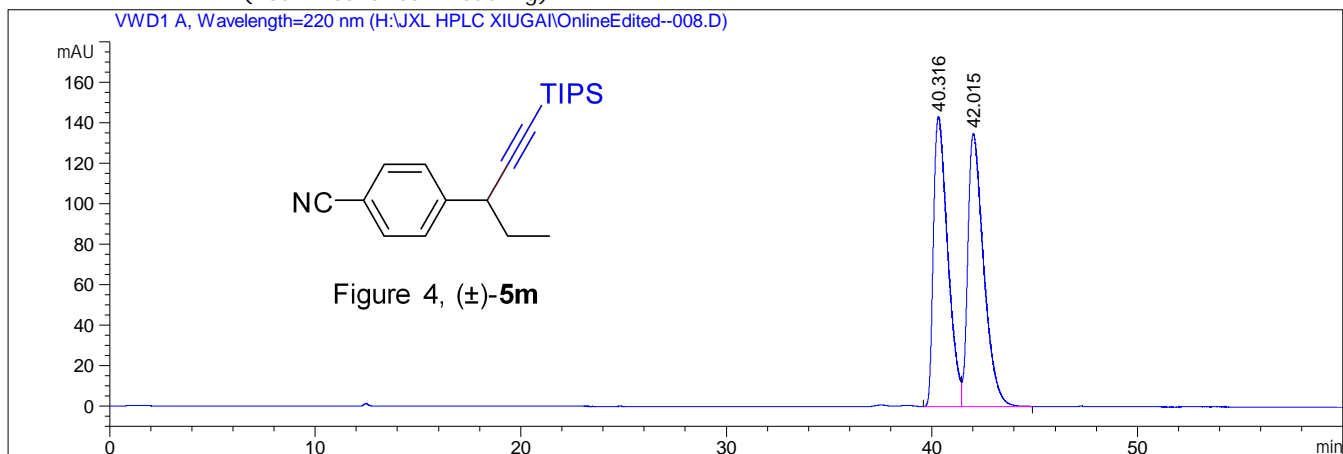

=====  
Area Percent Report  
=====

Sorted By : Signal  
Multiplier : 1.0000  
Dilution : 1.0000  
Do not use Multiplier & Dilution Factor with ISTDs

Signal 1: VWD1 A, Wavelength=220 nm

| Peak # | RetTime [min] | Type | Width [min] | Area [mAU*s] | Height [mAU] | Area %  |
|--------|---------------|------|-------------|--------------|--------------|---------|
| 1      | 40.316        | BV   | 0.7029      | 6916.47607   | 143.22227    | 48.8690 |
| 2      | 42.015        | VB   | 0.7842      | 7236.61133   | 134.82007    | 51.1310 |

Totals : 1.41531e4 278.04234

=====  
\*\*\* End of Report \*\*\*

=====  
Acq. Operator : 系统 Seq. Line : 77  
Acq. Instrument : HPLC-1260 Location : 97  
Injection Date : 9/7/2020 3:28:25 PM Inj : 1  
Inj Volume : 3.000 µl  
Different Inj Volume from Sample Entry! Actual Inj Volume : 0.300 µl  
Acq. Method : D:\zy\20200906\YH 2020-09-06 12-21-16\01PA-50-0.5-1-6-220-JXL.M  
Last changed : 9/7/2020 4:35:33 PM by 系统  
(modified after loading)  
Analysis Method : E:\DATA\20201027\LC 2020-12-16 12-53-00\151PA\_30\_0.8\_4.M (Sequence Method)  
Last changed : 12/16/2020 3:14:40 PM by SYSTEM  
(modified after loading)

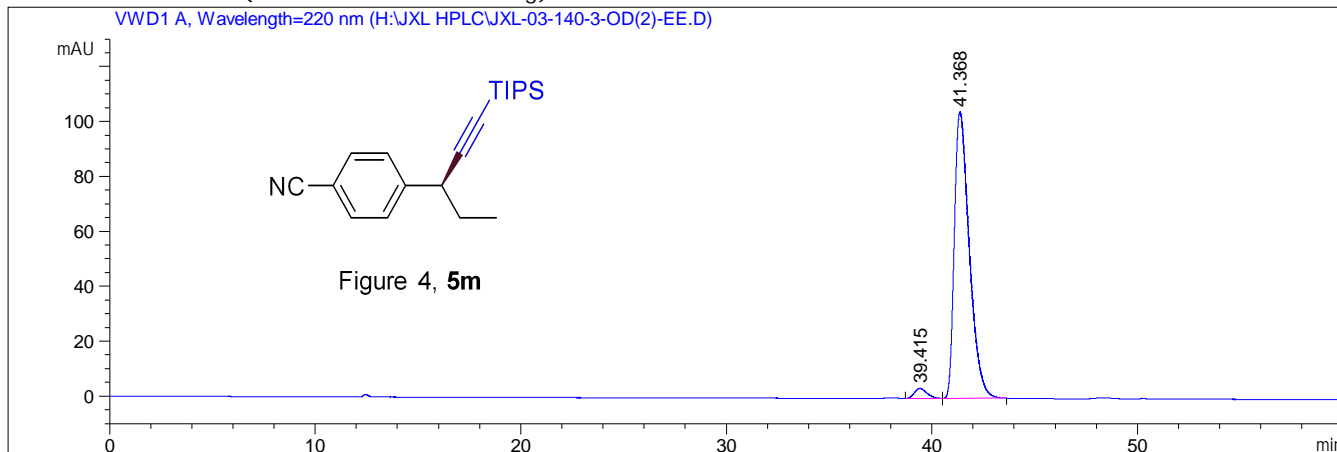

=====  
Area Percent Report  
=====

Sorted By : Signal  
Multiplier : 1.0000  
Dilution : 1.0000  
Do not use Multiplier & Dilution Factor with ISTDs

Signal 1: VWD1 A, Wavelength=220 nm

| Peak # | RetTime [min] | Type | Width [min] | Area [mAU*s] | Height [mAU] | Area %  |
|--------|---------------|------|-------------|--------------|--------------|---------|
| 1      | 39.415        | BB   | 0.4882      | 151.74007    | 3.64863      | 2.8049  |
| 2      | 41.368        | BB   | 0.7510      | 5258.08691   | 104.41154    | 97.1951 |

Totals : 5409.82698 108.06016

=====  
\*\*\* End of Report \*\*\*

=====

|                                                                                             |                       |
|---------------------------------------------------------------------------------------------|-----------------------|
| Acq. Operator : 系统                                                                          | Seq. Line : 20        |
| Acq. Instrument : HPLC-1260                                                                 | Location : 81         |
| Injection Date : 12/12/2020 4:57:42 PM                                                      | Inj : 1               |
|                                                                                             | Inj Volume : 3.000 µl |
| Different Inj Volume from Sample Entry! Actual Inj Volume : 2.000 µl                        |                       |
| Acq. Method : D:\G527\FZ\20201127\YH 2020-12-12 09-12-36\01PA-40-0.8-1-2-220-JXL.M          |                       |
| Last changed : 12/12/2020 5:33:13 PM by 系统                                                  |                       |
| (modified after Loading)                                                                    |                       |
| Analysis Method : E:\DATA\20201027\LC 2020-12-15 14-02-17\61PA_10_0.8_3.M (Sequence Method) |                       |
| Last changed : 12/15/2020 8:50:28 PM by SYSTEM                                              |                       |
| (modified after Loading)                                                                    |                       |

Additional Info : Peak(s) manually integrated

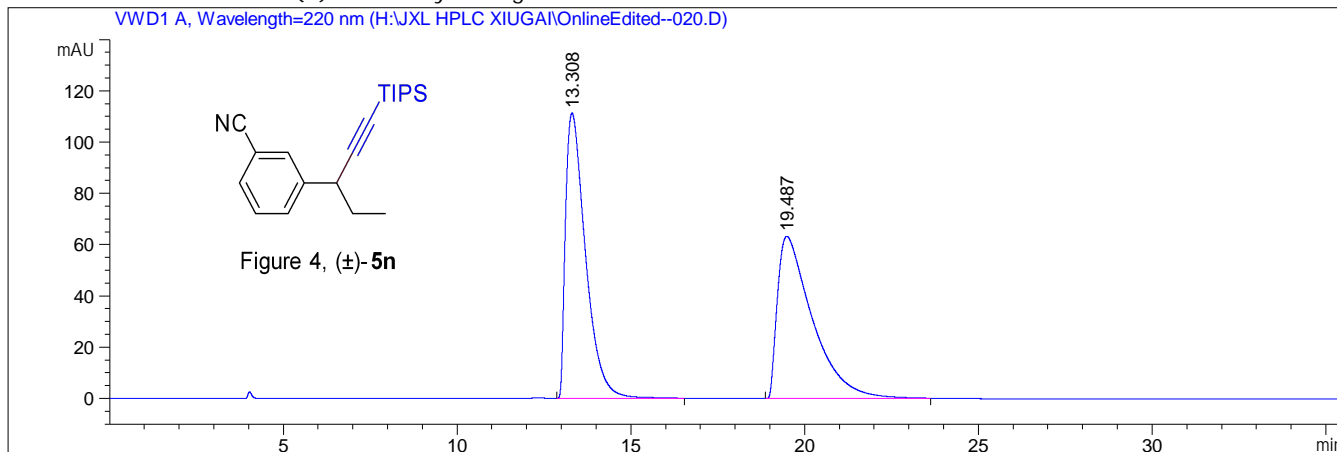

=====  
Area Percent Report  
=====

Sorted By : Signal  
Multiplier : 1.0000  
Dilution : 1.0000  
Do not use Multiplier & Dilution Factor with ISTDs

Signal 1: VWD1 A, Wavelength=220 nm

| Peak # | RetTime [min] | Type | Width [min] | Area [mAU*s] | Height [mAU] | Area %  |
|--------|---------------|------|-------------|--------------|--------------|---------|
| 1      | 13.308        | BB   | 0.6101      | 4459.22852   | 111.38471    | 50.2351 |
| 2      | 19.487        | BB   | 0.9239      | 4417.49512   | 63.20845     | 49.7649 |

Totals : 8876.72363 174.59316

=====  
\*\*\* End of Report \*\*\*

=====

|                 |                         |            |            |
|-----------------|-------------------------|------------|------------|
| Acq. Operator   | : 系统                    | Seq. Line  | : 21       |
| Acq. Instrument | : HPLC-1260             | Location   | : 82       |
| Injection Date  | : 12/12/2020 5:34:37 PM | Inj        | : 1        |
|                 |                         | Inj Volume | : 3.000 µl |

Acq. Method : D:\G527\FZ\20201127\YH 2020-12-12 09-12-36\01PA-40-0.8-1-2-220-JXL.M  
Last changed : 12/12/2020 5:33:13 PM by 系统  
Analysis Method : E:\DATA\20201027\LC 2020-12-15 14-02-17\61PA\_10\_0.8\_3.M (Sequence Method)  
Last changed : 12/15/2020 8:53:09 PM by SYSTEM  
(modified after loading)

Additional Info : Peak(s) manually integrated

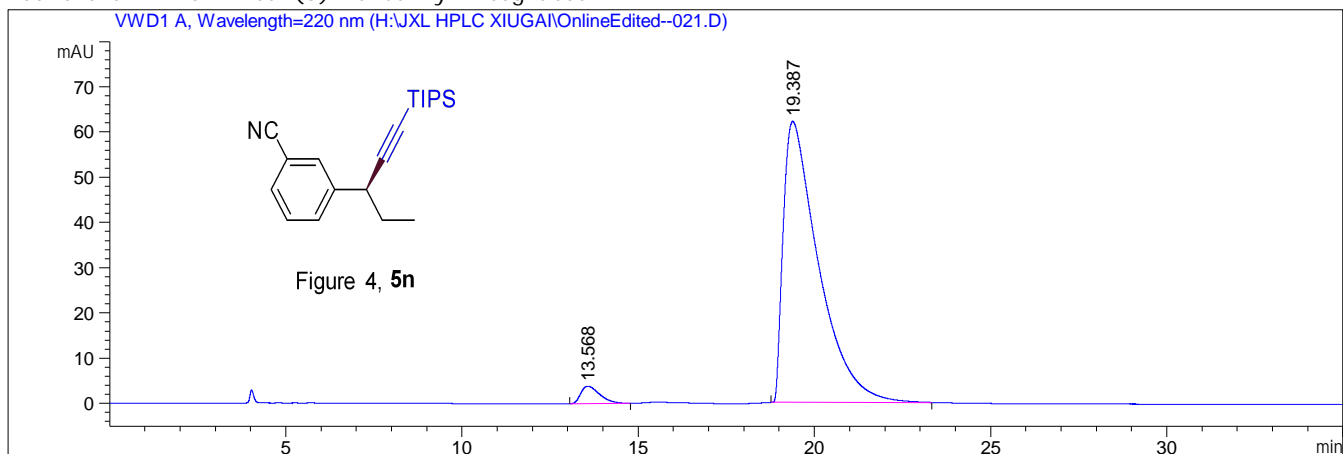

=====  
Area Percent Report  
=====

Sorted By : Signal  
Multiplier : 1.0000  
Dilution : 1.0000  
Do not use Multiplier & Dilution Factor with ISTDs

Signal 1: VWD1 A, Wavelength=220 nm

| Peak # | RetTime [min] | Type | Width [min] | Area [mAU*s] | Height [mAU] | Area %  |
|--------|---------------|------|-------------|--------------|--------------|---------|
| 1      | 13.568        | BB   | 0.4392      | 144.75229    | 3.87164      | 3.2444  |
| 2      | 19.387        | BB   | 0.9460      | 4316.88574   | 62.13744     | 96.7556 |

Totals : 4461.63803 66.00907

=====  
\*\*\* End of Report \*\*\*

```
=====
Acq. Operator   : 系统                               Seq. Line : 110
Acq. Instrument : HPLC-1260                           Location  : 61
Injection Date  : 12/15/2020 1:31:57 AM                Inj       : 2
                                                    Inj Volume: 3.000 µl
Different Inj Volume from Sample Entry! Actual Inj Volume : 5.000 µl
Acq. Method     : D:\G527\FZ\20201127\YH 2020-12-12 20-24-28\01PA-40-0.8-1-6-220-JXL.M
Last changed    : 12/14/2020 9:36:57 AM by 系统
Analysis Method : E:\DATA\20201027\LC 2020-12-15 14-02-17\61PA_10_0.8_3.M (Sequence Method)
Last changed    : 12/15/2020 9:00:19 PM by SYSTEM
                (modified after loading)
Additional Info : Peak(s) manually integrated
```

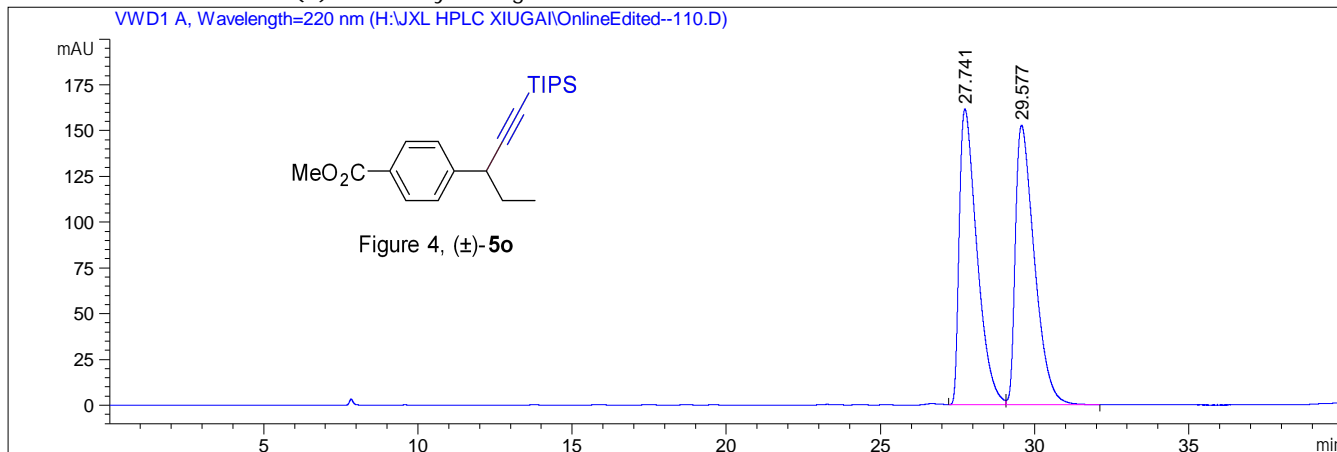

=====  
 Area Percent Report  
 =====

```
Sorted By      : Signal
Multiplier     : 1.0000
Dilution       : 1.0000
Do not use Multiplier & Dilution Factor with ISTDs
```

Signal 1: VWD1 A, Wavelength=220 nm

| Peak # | RetTime [min] | Type | Width [min] | Area [mAU*s] | Height [mAU] | Area %  |
|--------|---------------|------|-------------|--------------|--------------|---------|
| 1      | 27.741        | BV   | 0.5997      | 6440.34473   | 161.52284    | 49.5692 |
| 2      | 29.577        | VB   | 0.6333      | 6552.29932   | 152.65790    | 50.4308 |

Totals :                                    1.29926e4    314.18074

=====  
 \*\*\* End of Report \*\*\*

=====

|                                        |                       |
|----------------------------------------|-----------------------|
| Acq. Operator : 系统                     | Seq. Line : 111       |
| Acq. Instrument : HPLC-1260            | Location : 62         |
| Injection Date : 12/15/2020 2:13:22 AM | Inj : 1               |
|                                        | Inj Volume : 3.000 µl |

Different Inj Volume from Sample Entry! Actual Inj Volume : 1.500 µl

Acq. Method : D:\G527\FZ\20201127\YH 2020-12-12 20-24-28\OIPA-40-0.8-1-6-220-JXL.M  
Last changed : 12/14/2020 9:36:57 AM by 系统  
Analysis Method : E:\DATA\20201027\LC 2020-12-15 14-02-17\6I PA\_10\_0.8\_3.M (Sequence Method)  
Last changed : 12/15/2020 8:59:06 PM by SYSTEM  
(modified after Loading)

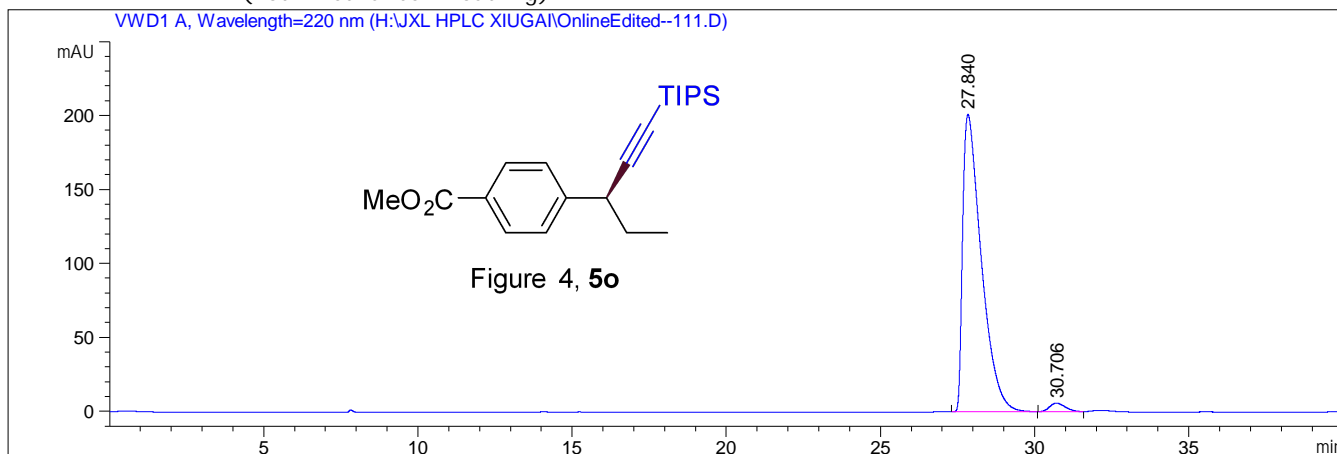

=====  
Area Percent Report  
=====

Sorted By : Signal  
Multiplier : 1.0000  
Dilution : 1.0000  
Do not use Multiplier & Dilution Factor with ISTDs

Signal 1: VWD1 A, Wavelength=220 nm

| Peak # | RetTime [min] | Type | Width [min] | Area [mAU*s] | Height [mAU] | Area %  |
|--------|---------------|------|-------------|--------------|--------------|---------|
| 1      | 27.840        | BB   | 0.6234      | 8452.31738   | 201.06433    | 97.6544 |
| 2      | 30.706        | BB   | 0.4168      | 203.01605    | 5.77937      | 2.3456  |

Totals : 8655.33344 206.84370

=====  
\*\*\* End of Report \*\*\*



=====

|                                       |                       |
|---------------------------------------|-----------------------|
| Acq. Operator : 系统                    | Seq. Line : 31        |
| Acq. Instrument : HPLC-1260           | Location : 95         |
| Injection Date : 6/15/2020 8:54:24 PM | Inj : 1               |
|                                       | Inj Volume : 3.000 µl |

Different Inj Volume from Sample Entry! Actual Inj Volume : 0.500 µl

|                                                                               |
|-------------------------------------------------------------------------------|
| Acq. Method : D:\zy\20200615\YH 2020-06-15 08-21-52\01PA-30-0.5-1-2-220-JXL.M |
| Last changed : 6/15/2020 8:52:56 PM by 系统                                     |
| Analysis Method : C:\CHEM32\1\METHODS\151PA_30_8_4.M                          |
| Last changed : 12/18/2020 9:43:32 PM by SYSTEM<br>(modified after loading)    |

Additional Info : Peak(s) manually integrated

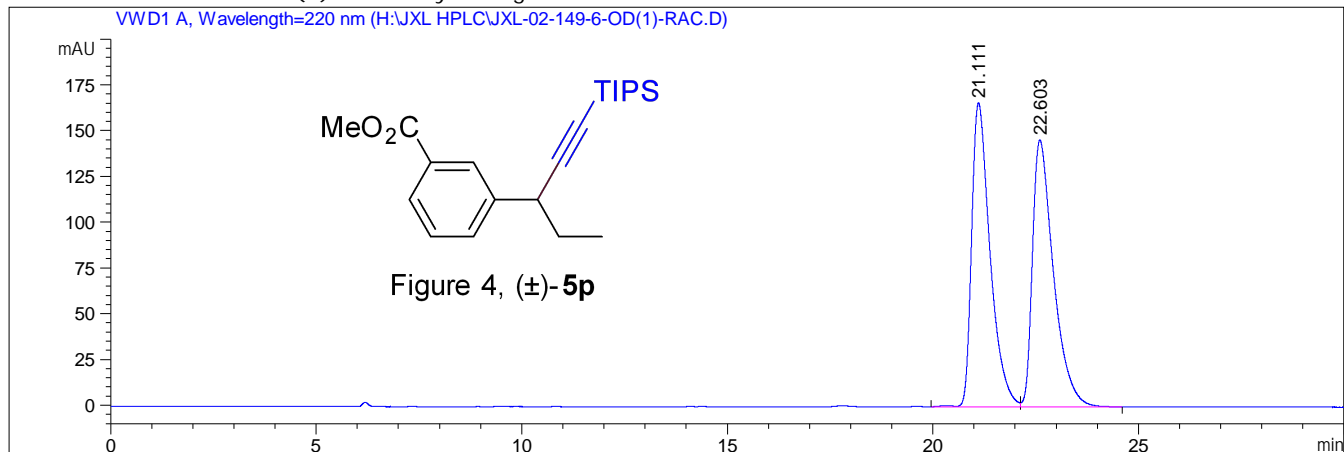

=====  
Area Percent Report  
=====

|            |   |        |
|------------|---|--------|
| Sorted By  | : | Signal |
| Multiplier | : | 1.0000 |
| Dilution   | : | 1.0000 |

Do not use Multiplier & Dilution Factor with ISTDs

Signal 1: VWD1 A, Wavelength=220 nm

| Peak # | RetTime [min] | Type | Width [min] | Area [mAU*s] | Height [mAU] | Area %  |
|--------|---------------|------|-------------|--------------|--------------|---------|
| 1      | 21.111        | W R  | 0.4701      | 5171.46680   | 165.94023    | 50.0069 |
| 2      | 22.603        | VB   | 0.5322      | 5170.04248   | 145.63780    | 49.9931 |

Totals : 1.03415e4 311.57803

=====  
\*\*\* End of Report \*\*\*

```
=====
Acq. Operator   : 系统                      Seq. Line : 49
Acq. Instrument : HPLC-1260                 Location  : 96
Injection Date  : 6/16/2020 4:59:14 PM      Inj       : 1
                                                Inj Volume: 3.000 µl
Different Inj Volume from Sample Entry! Actual Inj Volume : 0.400 µl
Acq. Method     : D:\G527\FZ\20200611\YH 2020-06-15 23-14-24\OIPA-30-0.5-1-2-220-JXL.M
Last changed    : 6/16/2020 8:53:54 AM by 系统
Analysis Method : E:\DATA\20201027\LC 2020-11-24 17-29-49\11PA-40-0.5-220-3-JXL.M (Sequence
Method)
Last changed    : 12/16/2020 11:40:15 AM by SYSTEM
(modified after Loading)
Additional Info  : Peak(s) manually integrated
=====
```

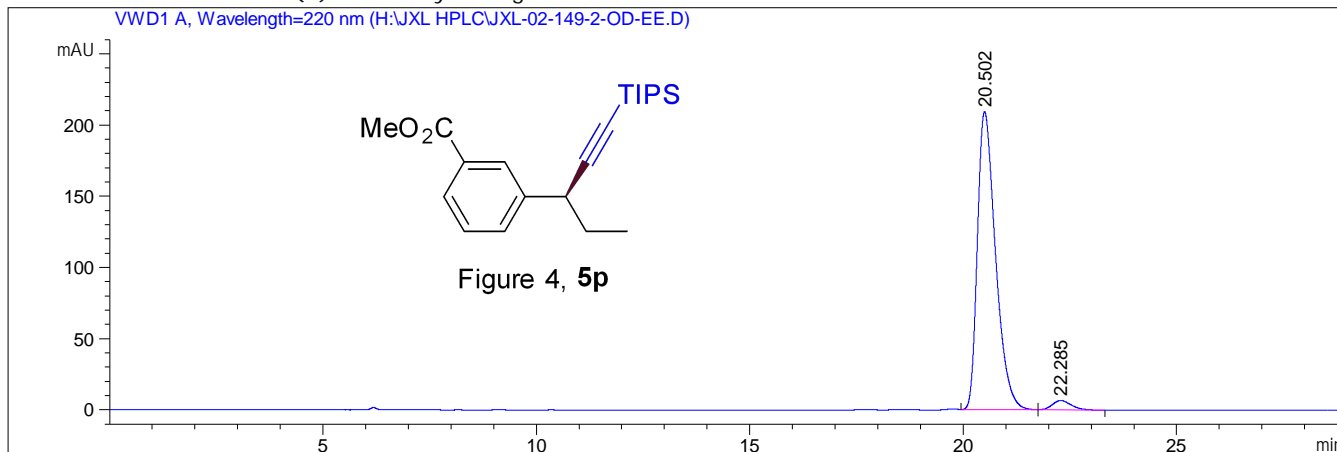

=====  
Area Percent Report  
=====

Sorted By : Signal  
Multiplier : 1.0000  
Dilution : 1.0000  
Do not use Multiplier & Dilution Factor with ISTDs

Signal 1: VWD1 A, Wavelength=220 nm

| Peak # | RetTime [min] | Type | Width [min] | Area [mAU*s] | Height [mAU] | Area %  |
|--------|---------------|------|-------------|--------------|--------------|---------|
| 1      | 20.502        | BB   | 0.4508      | 6165.68359   | 209.24425    | 96.8537 |
| 2      | 22.285        | BB   | 0.3691      | 200.29059    | 6.55361      | 3.1463  |

Totals : 6365.97418 215.79785

=====  
\*\*\* End of Report \*\*\*



=====  
Acq. Operator : 系统 Seq. Line : 124  
Acq. Instrument : HPLC-1260 Location : 86  
Injection Date : 11/1/2020 6:47:32 AM Inj : 1  
Inj Volume : 3.000 µl  
Different Inj Volume from Sample Entry! Actual Inj Volume : 0.800 µl  
Acq. Method : D:\G527\FZ\20201026\YH 2020-10-29 08-35-49\01PA-40-0.5-1-6-220-JXL.M  
Last changed : 10/31/2020 10:15:10 PM by 系统  
Analysis Method : E:\DATA\20201027\LC 2020-12-15 14-02-17\61PA\_10\_0.8\_3.M (Sequence Method)  
Last changed : 12/15/2020 9:24:30 PM by SYSTEM  
(modified after loading)  
Additional Info : Peak(s) manually integrated

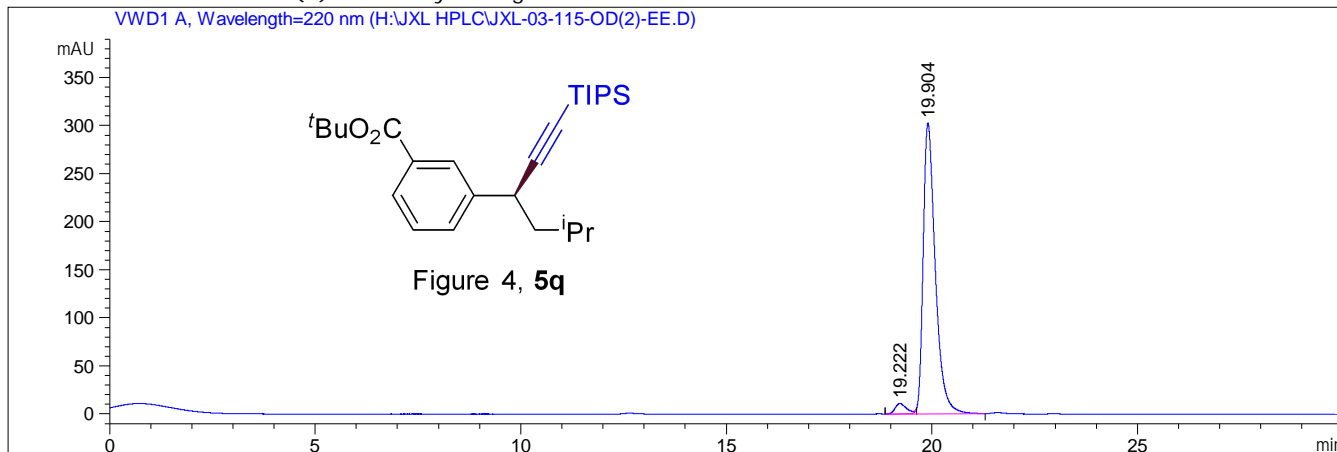

=====  
Area Percent Report  
=====

Sorted By : Signal  
Multiplier : 1.0000  
Dilution : 1.0000  
Do not use Multiplier & Dilution Factor with ISTDs

Signal 1: VWD1 A, Wavelength=220 nm

| Peak # | RetTime [min] | Type | Width [min] | Area [mAU*s] | Height [mAU] | Area %  |
|--------|---------------|------|-------------|--------------|--------------|---------|
| 1      | 19.222        | BV E | 0.2773      | 208.75603    | 10.95368     | 3.2626  |
| 2      | 19.904        | VB R | 0.3090      | 6189.72070   | 302.73431    | 96.7374 |

Totals : 6398.47673 313.68800

=====  
\*\*\* End of Report \*\*\*

=====

|                                       |                       |
|---------------------------------------|-----------------------|
| Acq. Operator : 系统                    | Seq. Line : 35        |
| Acq. Instrument : HPLC-1260           | Location : 94         |
| Injection Date : 9/22/2020 8:11:49 AM | Inj : 1               |
|                                       | Inj Volume : 3.000 µl |

Different Inj Volume from Sample Entry! Actual Inj Volume : 0.500 µl

|                                                                                             |
|---------------------------------------------------------------------------------------------|
| Acq. Method : D:\G527\FZ\20200822\YH 2020-09-21 18-04-54\01PA-35-0.3-1-6-220-JXL.M          |
| Last changed : 9/21/2020 10:01:05 PM by 系统                                                  |
| Analysis Method : E:\DATA\20201027\LC 2020-12-15 14-02-17\61PA_10_0.8_3.M (Sequence Method) |
| Last changed : 12/15/2020 9:26:51 PM by SYSTEM<br>(modified after loading)                  |

Additional Info : Peak(s) manually integrated

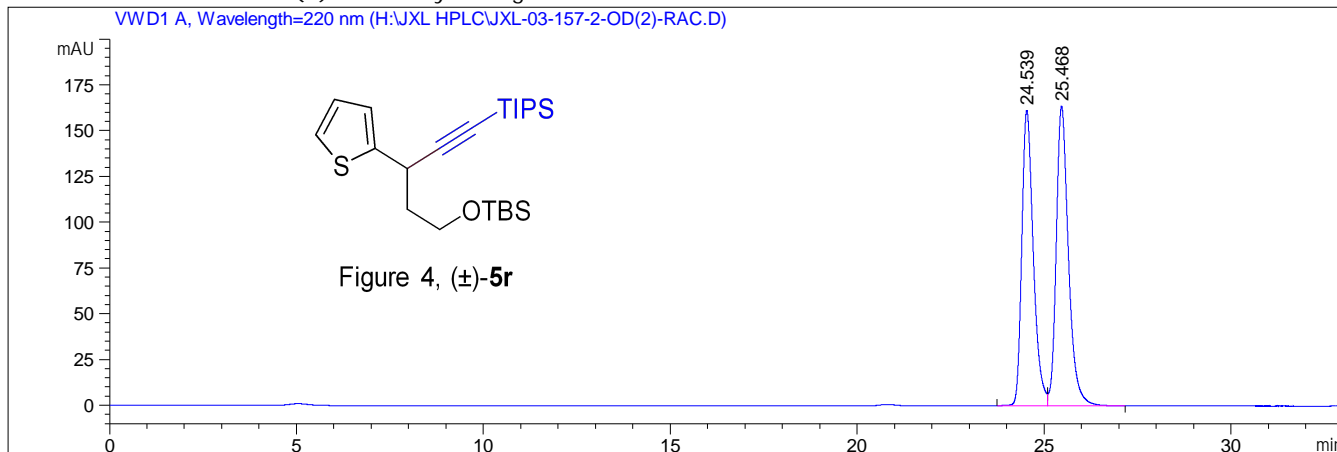

=====  
Area Percent Report  
=====

|            |   |        |
|------------|---|--------|
| Sorted By  | : | Signal |
| Multiplier | : | 1.0000 |
| Dilution   | : | 1.0000 |

Do not use Multiplier & Dilution Factor with ISTDs

Signal 1: VWD1 A, Wavelength=220 nm

| Peak # | RetTime [min] | Type | Width [min] | Area [mAU*s] | Height [mAU] | Area %  |
|--------|---------------|------|-------------|--------------|--------------|---------|
| 1      | 24.539        | BV   | 0.3261      | 3451.30762   | 161.34341    | 48.1006 |
| 2      | 25.468        | VB   | 0.3434      | 3723.87671   | 163.69365    | 51.8994 |

Totals :                      7175.18433   325.03706

=====  
\*\*\* End of Report \*\*\*

=====  
Acq. Operator : 系统 Seq. Line : 38  
Acq. Instrument : HPLC-1260 Location : 95  
Injection Date : 9/22/2020 9:58:01 AM Inj : 1  
Inj Volume : 3.000 µl  
Different Inj Volume from Sample Entry! Actual Inj Volume : 0.300 µl  
Acq. Method : D:\G527\FZ\20200822\YH 2020-09-21 18-04-54\01PA-35-0.3-1-6-220-JXL.M  
Last changed : 9/22/2020 9:56:24 AM by 系统  
Analysis Method : E:\DATA\20201027\LC 2020-12-15 14-02-17\61PA\_10\_0.8\_3.M (Sequence Method)  
Last changed : 12/15/2020 9:28:34 PM by SYSTEM  
(modified after loading)  
Additional Info : Peak(s) manually integrated

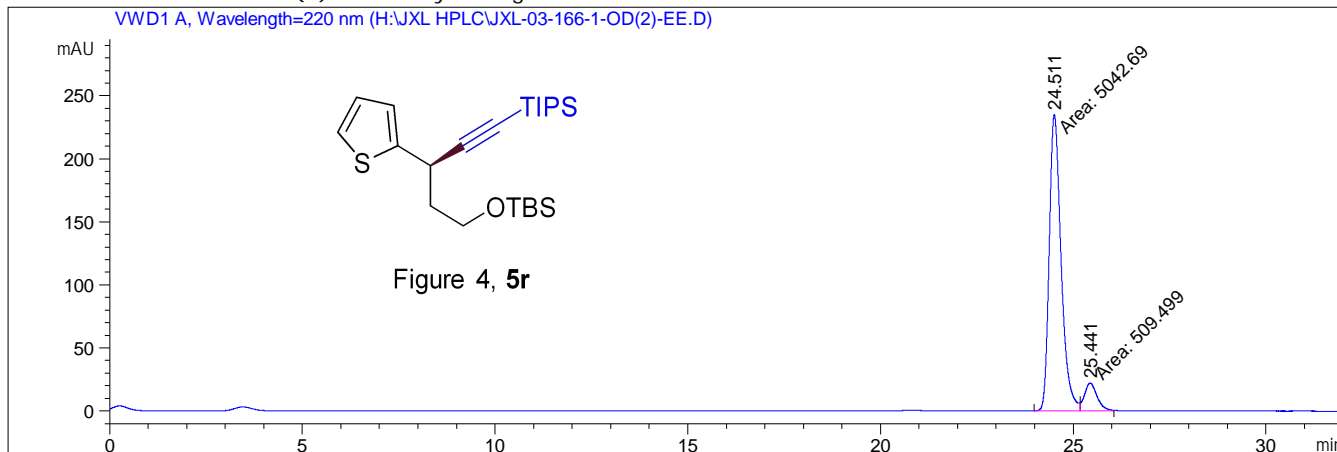

=====  
Area Percent Report  
=====

Sorted By : Signal  
Multiplier : 1.0000  
Dilution : 1.0000  
Do not use Multiplier & Dilution Factor with ISTDs

Signal 1: VWD1 A, Wavelength=220 nm

| Peak # | RetTime [min] | Type | Width [min] | Area [mAU*s] | Height [mAU] | Area %  |
|--------|---------------|------|-------------|--------------|--------------|---------|
| 1      | 24.511        | FM   | 0.3576      | 5042.69092   | 235.04404    | 90.8235 |
| 2      | 25.441        | MF   | 0.3822      | 509.49850    | 22.21989     | 9.1765  |

Totals : 5552.18942 257.26392

=====  
\*\*\* End of Report \*\*\*  
=====

=====

|                                                                      |                                                                                     |            |            |
|----------------------------------------------------------------------|-------------------------------------------------------------------------------------|------------|------------|
| Acq. Operator                                                        | : 系统                                                                                | Seq. Line  | : 116      |
| Acq. Instrument                                                      | : HPLC-1260                                                                         | Location   | : 83       |
| Injection Date                                                       | : 12/15/2020 5:00:41 AM                                                             | Inj        | : 1        |
|                                                                      |                                                                                     | Inj Volume | : 3.000 µl |
| Different Inj Volume from Sample Entry! Actual Inj Volume : 1.000 µl |                                                                                     |            |            |
| Acq. Method                                                          | : D:\G527\FZ\20201127\YH 2020-12-12 20-24-28\01PA-30-0.8-1-6-220-JXL.M              |            |            |
| Last changed                                                         | : 12/14/2020 9:37:57 AM by 系统                                                       |            |            |
| Analysis Method                                                      | : E:\DATA\20201027\LC 2020-11-24 17-29-49\11PA-40-0.5-220-3-JXL.M (Sequence Method) |            |            |
| Last changed                                                         | : 12/16/2020 11:43:39 AM by SYSTEM<br>(modified after loading)                      |            |            |

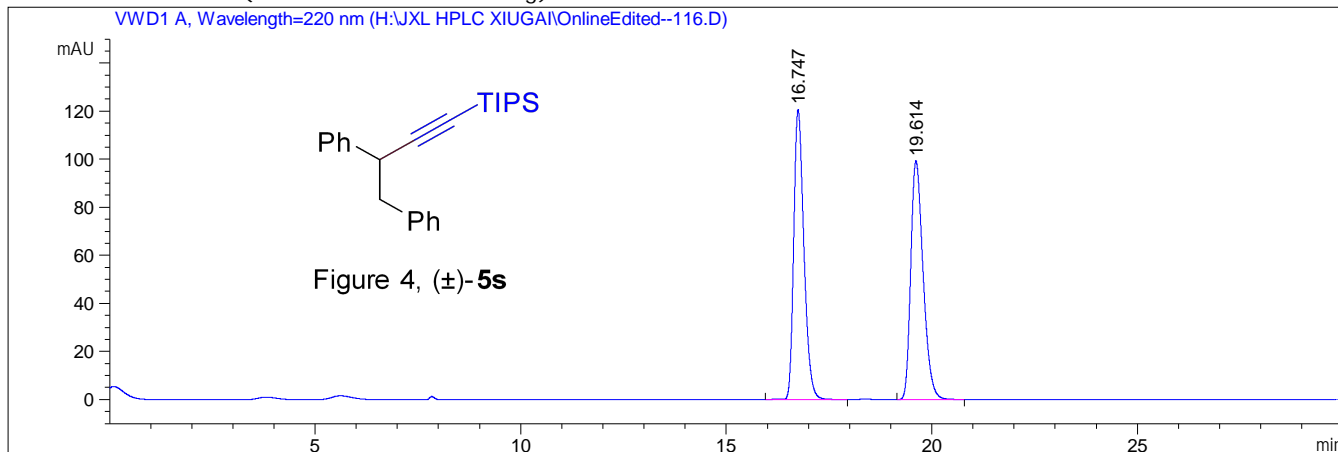

=====  
 Area Percent Report  
 =====

Sorted By : Signal  
 Multiplier : 1.0000  
 Dilution : 1.0000  
 Do not use Multiplier & Dilution Factor with ISTDs

Signal 1: VWD1 A, Wavelength=220 nm

| Peak # | RetTime [min] | Type | Width [min] | Area [mAU*s] | Height [mAU] | Area %  |
|--------|---------------|------|-------------|--------------|--------------|---------|
| 1      | 16.747        | VB R | 0.2644      | 2085.05396   | 120.80421    | 50.0368 |
| 2      | 19.614        | BB   | 0.3213      | 2081.99048   | 99.44037     | 49.9632 |

Totals : 4167.04443 220.24458

=====  
 \*\*\* End of Report \*\*\*

Sample Name: JXL-02-167-2-0D(2)

```

=====
Acq. Operator   : 系统                               Seq. Line : 117
Acq. Instrument : HPLC-1260                          Location  : 84
Injection Date  : 12/15/2020 5:32:11 AM             Inj       : 1
                                                    Inj Volume: 3.000 µl
Different Inj Volume from Sample Entry! Actual Inj Volume : 1.000 µl
Acq. Method     : D:\G527\FZ\20201127\YH 2020-12-12 20-24-28\01PA-30-0.8-1-6-220-JXL.M
Last changed    : 12/14/2020 9:37:57 AM by 系统
Analysis Method : E:\DATA\20201027\LC 2020-11-24 17-29-49\11PA-40-0.5-220-3-JXL.M (Sequence
                  Method)
Last changed    : 12/16/2020 11:45:08 AM by SYSTEM
                  (modified after loading)
Additional Info : Peak(s) manually integrated
  
```

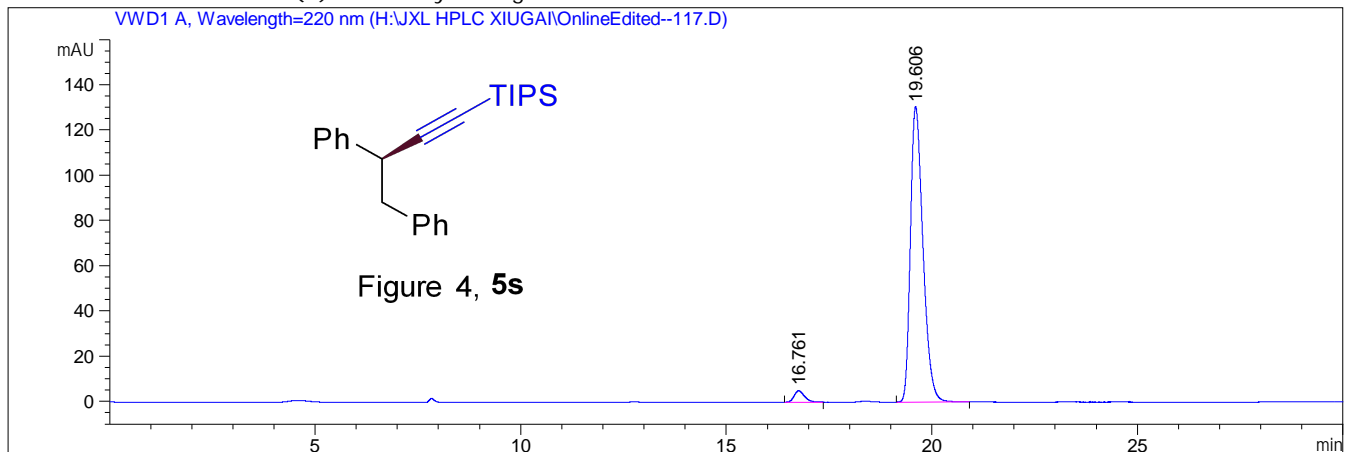

Area Percent Report

```

Sorted By      : Signal
Multiplier     : 1.0000
Dilution       : 1.0000
Do not use Multiplier & Dilution Factor with ISTDs
  
```

Signal 1: VWD1 A, Wavelength=220 nm

| Peak # | RetTime [min] | Type | Width [min] | Area [mAU*s] | Height [mAU] | Area %  |
|--------|---------------|------|-------------|--------------|--------------|---------|
| 1      | 16.761        | BB   | 0.2505      | 86.25835     | 5.04446      | 3.0187  |
| 2      | 19.606        | BB   | 0.3264      | 2771.22437   | 130.70523    | 96.9813 |

Totals :                                    2857.48272    135.74969

\*\*\* End of Report \*\*\*



=====

|                                                                                               |                       |
|-----------------------------------------------------------------------------------------------|-----------------------|
| Acq. Operator : 系统                                                                            | Seq. Line : 10        |
| Acq. Instrument : HPLC-1260                                                                   | Location : 91         |
| Injection Date : 8/8/2020 8:42:21 PM                                                          | Inj : 2               |
|                                                                                               | Inj Volume : 3.000 µl |
| Different Inj Volume from Sample Entry! Actual Inj Volume : 0.500 µl                          |                       |
| Acq. Method : D:\JXL\20200808\YH 2020-08-08 16-05-24\01 PA-40-0.3-1-2-220-JXL.M               |                       |
| Last changed : 8/8/2020 9:16:15 PM by 系统                                                      |                       |
| (modified after Loading)                                                                      |                       |
| Analysis Method : E:\DATA\20201027\LC 2020-12-19 17-11-35\101 PA_45_0.8_4.M (Sequence Method) |                       |
| Last changed : 12/20/2020 1:16:54 PM by SYSTEM                                                |                       |
| (modified after Loading)                                                                      |                       |

Additional Info : Peak(s) manually integrated

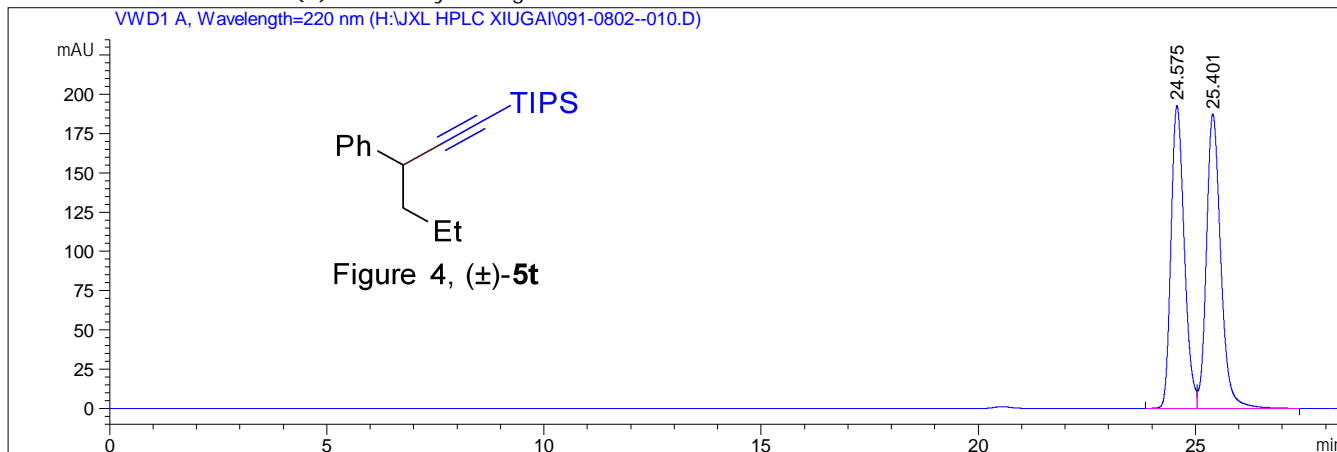

=====  
Area Percent Report  
=====

Sorted By : Signal  
Multiplier : 1.0000  
Dilution : 1.0000  
Do not use Multiplier & Dilution Factor with ISTDs

Signal 1: VWD1 A, Wavelength=220 nm

| Peak # | RetTime [min] | Type | Width [min] | Area [mAU*s] | Height [mAU] | Area %  |
|--------|---------------|------|-------------|--------------|--------------|---------|
| 1      | 24.575        | BV   | 0.3294      | 4100.78613   | 193.01289    | 48.7329 |
| 2      | 25.401        | VB   | 0.3520      | 4314.04102   | 187.80188    | 51.2671 |

Totals :                    8414.82715   380.81477

=====  
\*\*\* End of Report \*\*\*

=====

|                                       |                       |
|---------------------------------------|-----------------------|
| Acq. Operator : 系统                    | Seq. Line : 13        |
| Acq. Instrument : HPLC-1260           | Location : 95         |
| Injection Date : 8/20/2020 3:34:30 AM | Inj : 1               |
|                                       | Inj Volume : 3.000 µl |

Different Inj Volume from Sample Entry! Actual Inj Volume : 0.200 µl

|                                                                                 |
|---------------------------------------------------------------------------------|
| Acq. Method : D:\JXL\20200819\YH 2020-08-19 21-39-43\01 PA-30-0.3-1-6-220-JXL.M |
| Last changed : 8/19/2020 9:39:43 PM by 系统                                       |
| Analysis Method : C:\CHEM32\1\METHODS\11 PA_20_1_0_3.CJM.M                      |
| Last changed : 12/16/2020 2:45:22 PM by SYSTEM<br>(modified after loading)      |

Additional Info : Peak(s) manually integrated

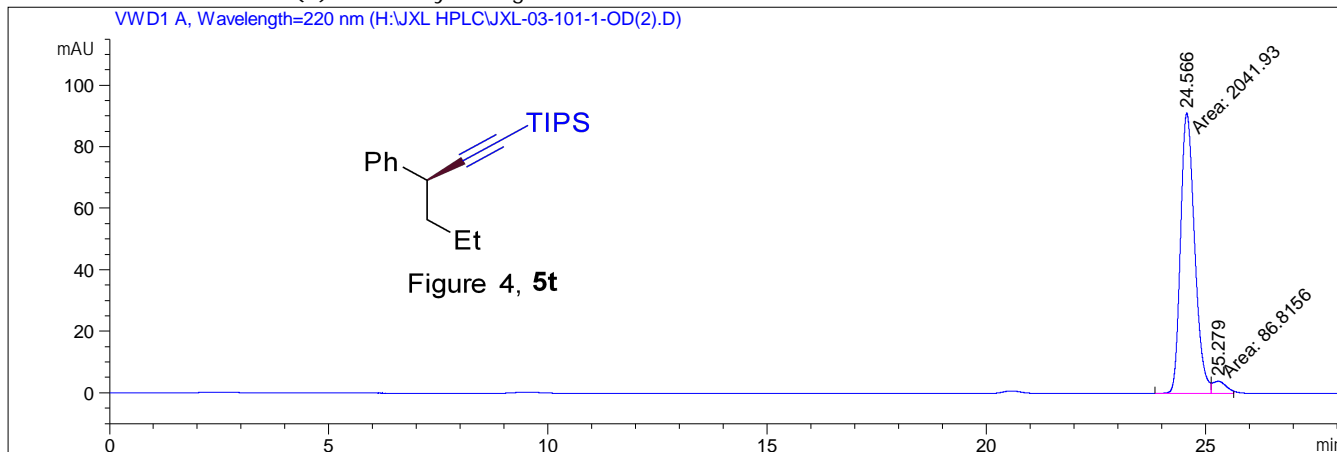

=====  
Area Percent Report  
=====

|            |   |        |
|------------|---|--------|
| Sorted By  | : | Signal |
| Multiplier | : | 1.0000 |
| Dilution   | : | 1.0000 |

Do not use Multiplier & Dilution Factor with ISTDs

Signal 1: VWD1 A, Wavelength=220 nm

| Peak # | RetTime [min] | Type | Width [min] | Area [mAU*s] | Height [mAU] | Area %  |
|--------|---------------|------|-------------|--------------|--------------|---------|
| 1      | 24.566        | MF   | 0.3732      | 2041.93396   | 91.18871     | 95.9218 |
| 2      | 25.279        | MF   | 0.3618      | 86.81557     | 3.99962      | 4.0782  |

Totals :                      2128.74953    95.18834

=====  
\*\*\* End of Report \*\*\*

=====

|                                       |                       |
|---------------------------------------|-----------------------|
| Acq. Operator : 系统                    | Seq. Line : 19        |
| Acq. Instrument : HPLC-1260           | Location : 91         |
| Injection Date : 8/23/2020 1:24:20 AM | Inj : 1               |
|                                       | Inj Volume : 3.000 µl |

Different Inj Volume from Sample Entry! Actual Inj Volume : 0.200 µl

|                                                                                            |
|--------------------------------------------------------------------------------------------|
| Acq. Method : D:\G527\FZ\20200822\YH 2020-08-22 18-57-44\OIPA-40-0.8-1-2-220-JXL.M         |
| Last changed : 8/22/2020 9:23:07 PM by 系统                                                  |
| Analysis Method : E:\DATA\20201027\LC 2020-12-18 10-52-42\OIPA_15_10_3.M (Sequence Method) |
| Last changed : 12/18/2020 3:03:04 PM by SYSTEM<br>(modified after loading)                 |

Additional Info : Peak(s) manually integrated

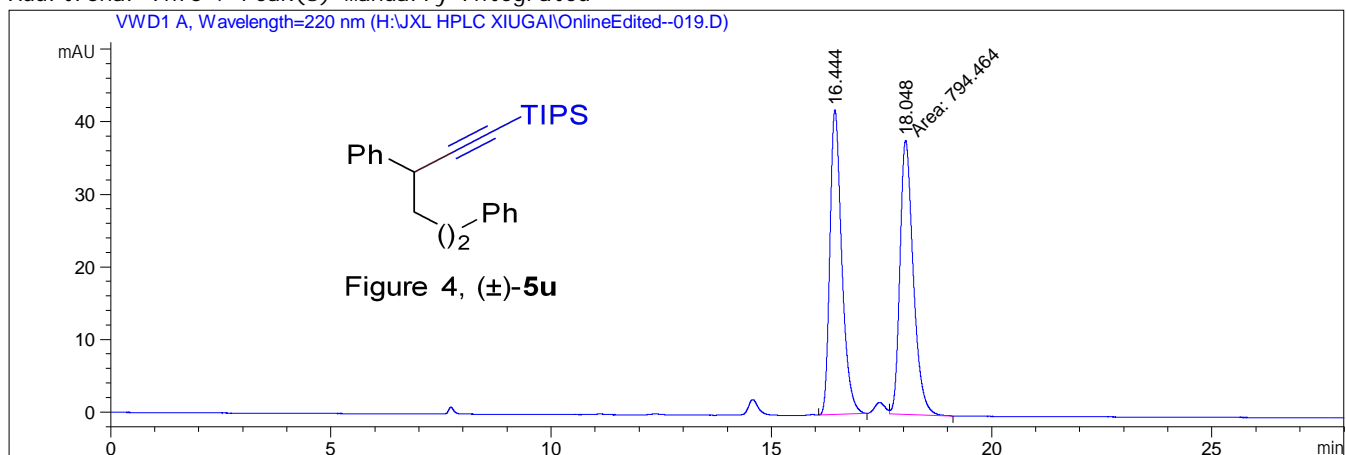

=====  
Area Percent Report  
=====

Sorted By : Signal  
Multiplier : 1.0000  
Dilution : 1.0000  
Do not use Multiplier & Dilution Factor with ISTDs

Signal 1: VWD1 A, Wavelength=220 nm

| Peak # | RetTime [min] | Type | Width [min] | Area [mAU*s] | Height [mAU] | Area %  |
|--------|---------------|------|-------------|--------------|--------------|---------|
| 1      | 16.444        | BB   | 0.2856      | 786.78638    | 41.99541     | 49.7572 |
| 2      | 18.048        | FM   | 0.3504      | 794.46375    | 37.78609     | 50.2428 |

Totals : 1581.25012 79.78150

=====  
\*\*\* End of Report \*\*\*

```

=====
Acq. Operator   : 系统                      Seq. Line :    3
Acq. Instrument : HPLC-1260                 Location  :   92
Injection Date  : 8/23/2020 8:08:34 PM      Inj       :    1
                                           Inj Volume: 3.000 µl
Different Inj Volume from Sample Entry! Actual Inj Volume : 0.600 µl
Acq. Method     : D:\JXL\20200823\YH 2020-08-23 19-08-47\01 PA-40-0.8-1-2-220-JXL.M
Last changed    : 8/23/2020 8:45:56 PM by 系统
                                           (modified after Loading)
Analysis Method : E:\DATA\20201027\LC 2020-12-18 10-52-42\201 PA_15_10_3.M (Sequence Method)
Last changed    : 12/18/2020 3:05:03 PM by SYSTEM
                                           (modified after Loading)
Additional Info : Peak(s) manually integrated
  
```

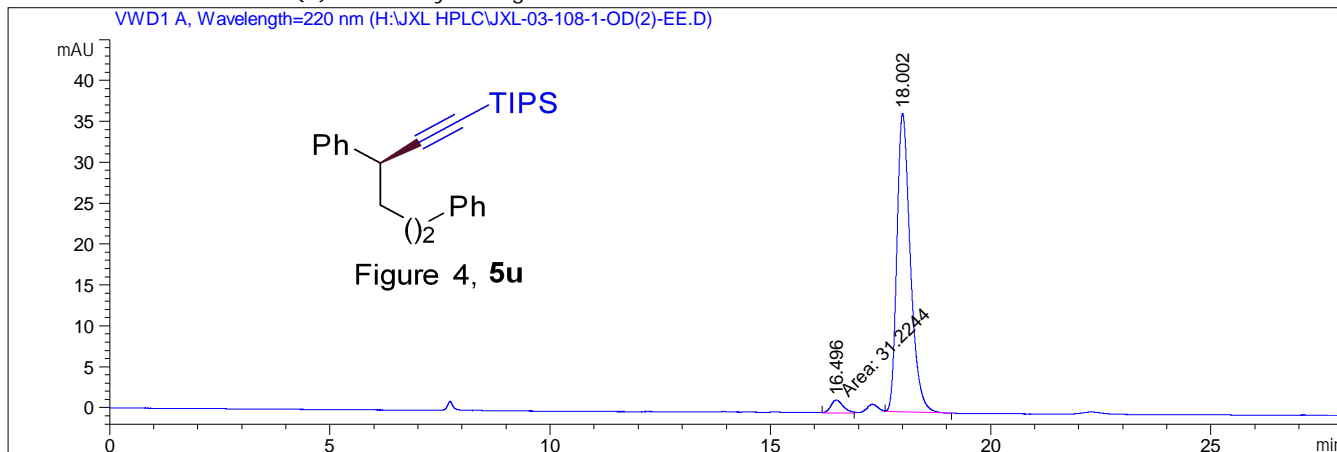

=====  
 Area Percent Report  
 =====

Sorted By : Signal  
 Multiplier : 1.0000  
 Dilution : 1.0000  
 Do not use Multiplier & Dilution Factor with ISTDs

Signal 1: VWD1 A, Wavelength=220 nm

| Peak # | RetTime [min] | Type | Width [min] | Area [mAU*s] | Height [mAU] | Area %  |
|--------|---------------|------|-------------|--------------|--------------|---------|
| 1      | 16.496        | MM   | 0.3235      | 31.22440     | 1.60860      | 3.8895  |
| 2      | 18.002        | BB   | 0.3203      | 771.57056    | 36.47853     | 96.1105 |

Totals : 802.79495 38.08713

=====  
 \*\*\* End of Report \*\*\*



=====  
Acq. Operator : 系统 Seq. Line : 67  
Acq. Instrument : HPLC-1260 Location : 88  
Injection Date : 9/2/2020 10:39:15 AM Inj : 1  
Inj Volume : 3.000 µl  
Different Inj Volume from Sample Entry! Actual Inj Volume : 0.500 µl  
Acq. Method : D:\zy\20200901\YH 2020-09-01 09-59-23\01PA-40-0.8-1-6-220-JXL.M  
Last changed : 9/1/2020 10:11:54 PM by 系统  
Analysis Method : C:\CHEM32\1\METHODS\11PA\_20\_1\_0\_3.CJM.M  
Last changed : 12/16/2020 2:48:23 PM by SYSTEM  
(modified after loading)  
Additional Info : Peak(s) manually integrated

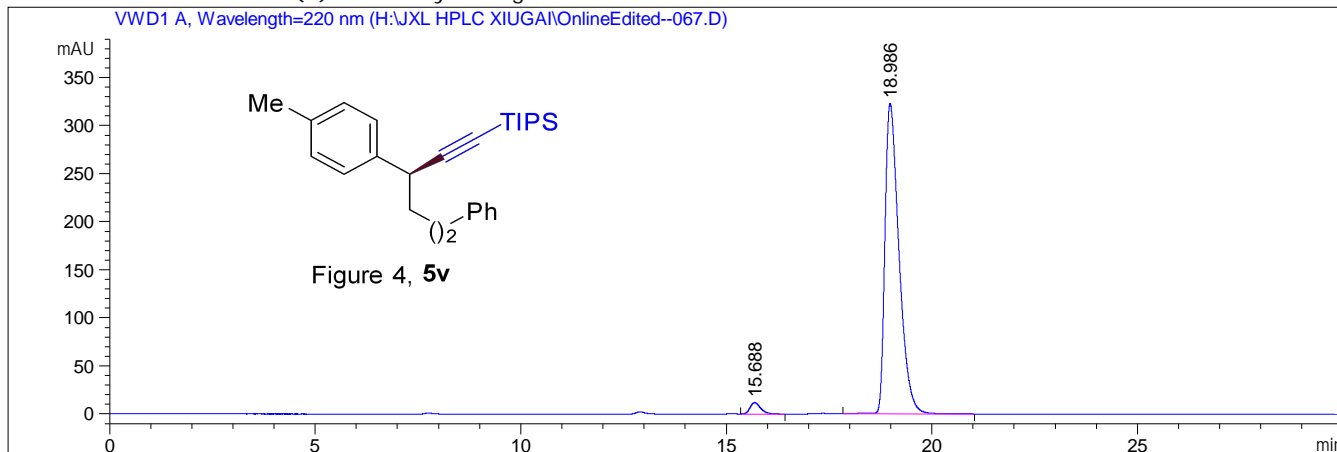

=====  
Area Percent Report  
=====

Sorted By : Signal  
Multiplier : 1.0000  
Dilution : 1.0000  
Do not use Multiplier & Dilution Factor with ISTDs

Signal 1: VWD1 A, Wavelength=220 nm

| Peak # | RetTime [min] | Type | Width [min] | Area [mAU*s] | Height [mAU] | Area %  |
|--------|---------------|------|-------------|--------------|--------------|---------|
| 1      | 15.688        | BB   | 0.2716      | 211.30690    | 11.79120     | 2.6762  |
| 2      | 18.986        | VB R | 0.3611      | 7684.48779   | 322.94391    | 97.3238 |

Totals : 7895.79469 334.73511

=====  
\*\*\* End of Report \*\*\*

```
=====
Acq. Operator   : 系统                               Seq. Line :   36
Acq. Instrument : HPLC-1260                          Location  :   89
Injection Date  : 9/3/2020 11:05:09 PM                Inj       :    1
                                                    Inj Volume : 3.000 µl
Different Inj Volume from Sample Entry! Actual Inj Volume : 2.000 µl
Acq. Method     : D:\JXL\20200902\YH 2020-09-02 16-57-48\01PA-90-0.5-1-6-220-JXL.M
Last changed    : 9/3/2020 11:09:41 PM by 系统
                (modified after Loading)
Analysis Method : E:\DATA\20201027\LC 2020-12-15 14-02-17\61PA_10_0.8_3.M (Sequence Method)
Last changed    : 12/15/2020 10:10:58 PM by SYSTEM
                (modified after Loading)
Additional Info  : Peak(s) manually integrated
=====
```

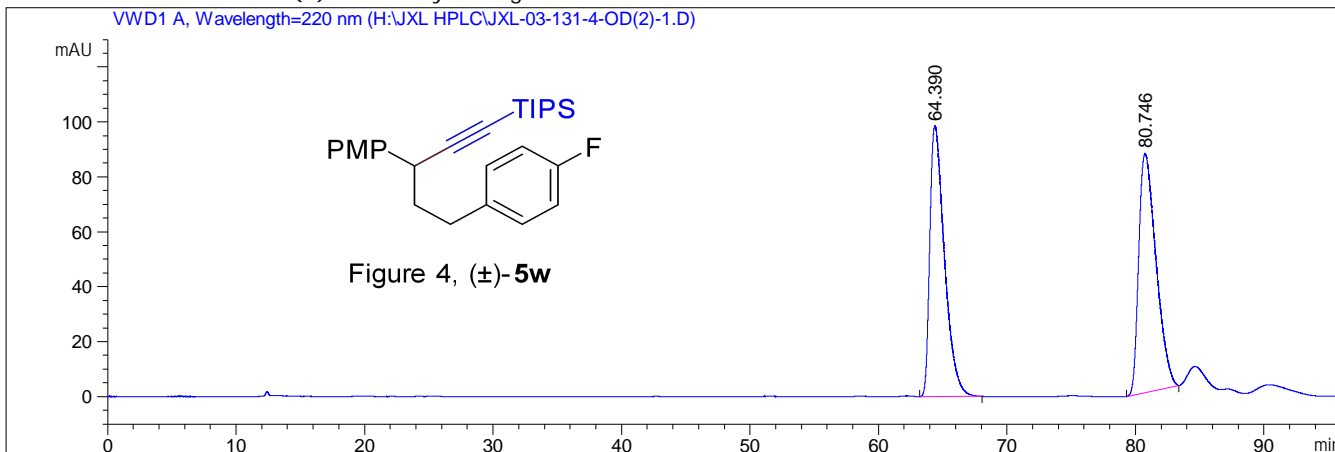

=====  
Area Percent Report  
=====

Sorted By : Signal  
Multiplier : 1.0000  
Dilution : 1.0000  
Do not use Multiplier & Dilution Factor with ISTDs

Signal 1: VWD1 A, Wavelength=220 nm

| Peak # | RetTime [min] | Type | Width [min] | Area [mAU*s] | Height [mAU] | Area %  |
|--------|---------------|------|-------------|--------------|--------------|---------|
| 1      | 64.390        | BB   | 1.0778      | 7801.03662   | 98.67648     | 48.9508 |
| 2      | 80.746        | BB   | 1.2471      | 8135.43311   | 87.11023     | 51.0492 |

Totals : 1.59365e4 185.78671

=====  
\*\*\* End of Report \*\*\*  
=====

=====

|                                                                      |                                                                             |            |            |
|----------------------------------------------------------------------|-----------------------------------------------------------------------------|------------|------------|
| Acq. Operator                                                        | : 系统                                                                        | Seq. Line  | : 35       |
| Acq. Instrument                                                      | : HPLC-1260                                                                 | Location   | : 72       |
| Injection Date                                                       | : 9/3/2020 9:33:43 PM                                                       | Inj        | : 1        |
|                                                                      |                                                                             | Inj Volume | : 3.000 µl |
| Different Inj Volume from Sample Entry! Actual Inj Volume : 2.000 µl |                                                                             |            |            |
| Acq. Method                                                          | : D:\JXL\20200902\YH 2020-09-02 16-57-48\01PA-90-0.5-1-6-220-JXL.M          |            |            |
| Last changed                                                         | : 9/3/2020 11:02:41 PM by 系统<br>(modified after Loading)                    |            |            |
| Analysis Method                                                      | : E:\DATA\20201027\LC 2020-12-15 14-02-17\61PA_10_0.8_3.M (Sequence Method) |            |            |
| Last changed                                                         | : 12/15/2020 10:12:40 PM by SYSTEM<br>(modified after Loading)              |            |            |

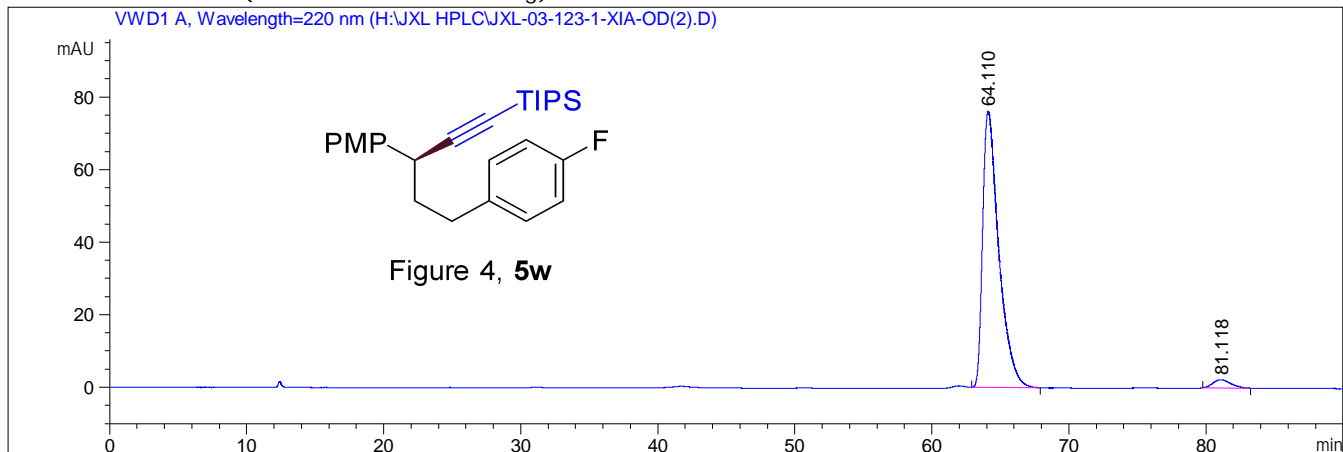

=====  
Area Percent Report  
=====

Sorted By : Signal  
Multiplier : 1.0000  
Dilution : 1.0000  
Do not use Multiplier & Dilution Factor with ISTDs

Signal 1: VWD1 A, Wavelength=220 nm

| Peak # | RetTime [min] | Type | Width [min] | Area [mAU*s] | Height [mAU] | Area %  |
|--------|---------------|------|-------------|--------------|--------------|---------|
| 1      | 64.110        | BB   | 1.1146      | 6215.83203   | 76.20796     | 96.8170 |
| 2      | 81.118        | BB   | 1.0648      | 204.35680    | 2.24434      | 3.1830  |

Totals :                    6420.18883    78.45230

=====  
\*\*\* End of Report \*\*\*



```

=====
Acq. Operator   : 系统                      Seq. Line :    9
Acq. Instrument : HPLC-1260                 Location  :   81
Injection Date  : 9/3/2020 1:06:15 AM       Inj       :    1
                                           Inj Volume: 3.000 µl
Different Inj Volume from Sample Entry! Actual Inj Volume : 0.800 µl
Acq. Method     : D:\JXL\20200902\YH 2020-09-02 16-57-48\01 PA-30-0.5-1-6-220-JXL.M
Last changed    : 9/2/2020 11:43:41 PM by 系统
Analysis Method : E:\DATA\20201027\LC 2020-12-15 14-02-17\61 PA_10_0.8_3.M (Sequence Method)
Last changed    : 12/15/2020 10:13:54 PM by SYSTEM
                (modified after Loading)
=====
  
```

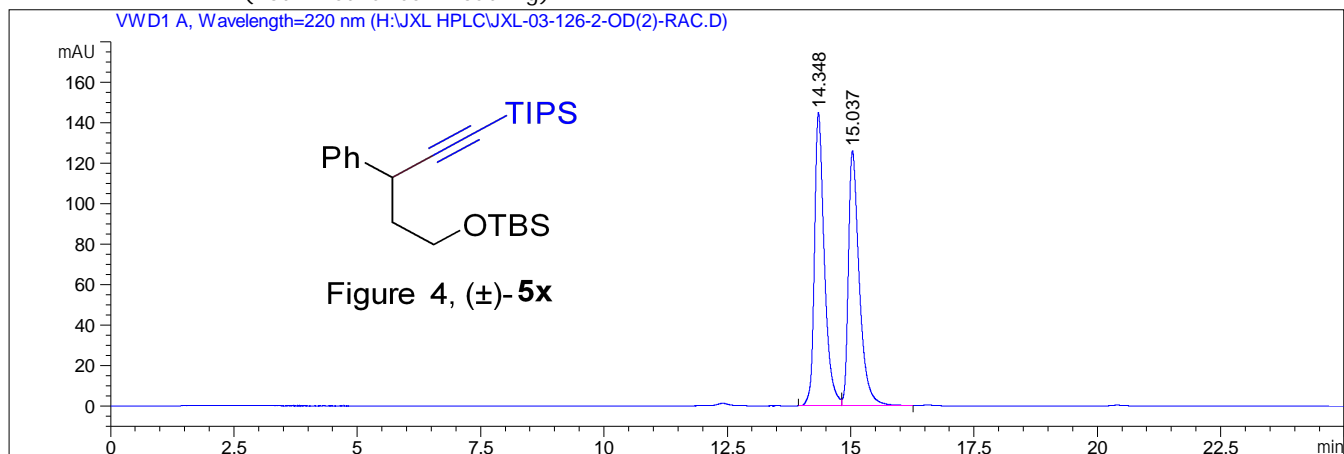

=====  
 Area Percent Report  
 =====

```

Sorted By       :      Signal
Multiplier      :      1.0000
Dilution        :      1.0000
Do not use Multiplier & Dilution Factor with ISTDs
  
```

Signal 1: VWD1 A, Wavelength=220 nm

| Peak # | RetTime [min] | Type | Width [min] | Area [mAU*s] | Height [mAU] | Area %  |
|--------|---------------|------|-------------|--------------|--------------|---------|
| 1      | 14.348        | BV   | 0.2091      | 2025.82507   | 144.89226    | 51.1203 |
| 2      | 15.037        | VB   | 0.2303      | 1937.03552   | 126.01382    | 48.8797 |

Totals :                      3962.86060   270.90607

=====  
 \*\*\* End of Report \*\*\*

```

=====
Acq. Operator   : 系统                               Seq. Line :   10
Acq. Instrument : HPLC-1260                           Location  :    82
Injection Date  : 9/3/2020 1:37:40 AM                  Inj       :    1
                                                    Inj Volume: 3.000 µl
Different Inj Volume from Sample Entry! Actual Inj Volume : 0.800 µl
Acq. Method     : D:\JXL\20200902\YH 2020-09-02 16-57-48\01PA-30-0.5-1-6-220-JXL.M
Last changed    : 9/2/2020 11:43:41 PM by 系统
Analysis Method : E:\DATA\20201027\LC 2020-12-15 14-02-17\61PA_10_0.8_3.M (Sequence Method)
Last changed    : 12/15/2020 10:15:20 PM by SYSTEM
                  (modified after loading)
Additional Info : Peak(s) manually integrated
  
```

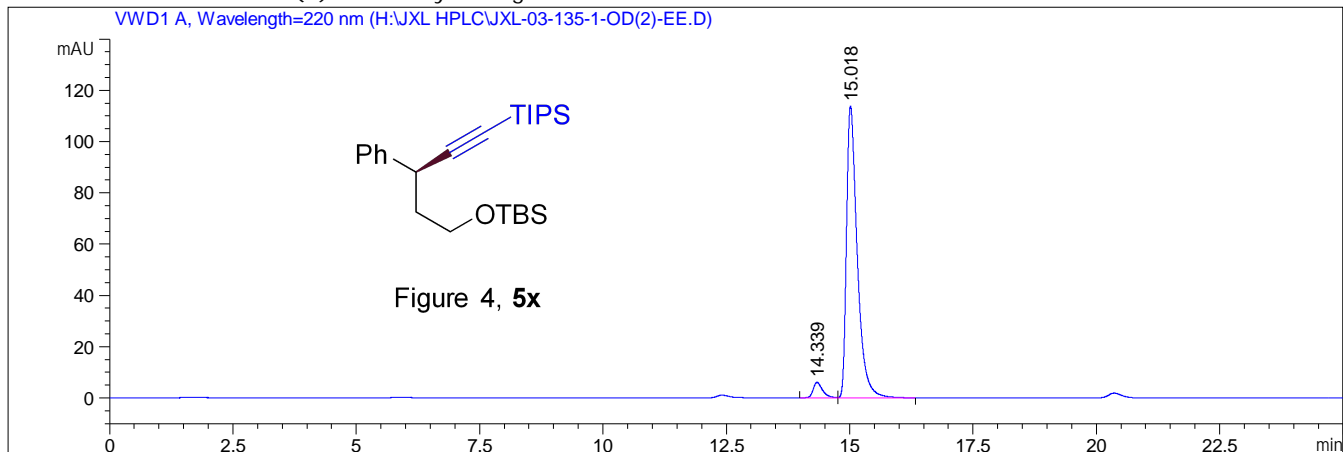

=====  
 Area Percent Report  
 =====

```

Sorted By       :      Signal
Multiplier      :      1.0000
Dilution        :      1.0000
Do not use Multiplier & Dilution Factor with ISTDs
  
```

Signal 1: VWD1 A, Wavelength=220 nm

| Peak # | RetTime [min] | Type | Width [min] | Area [mAU*s] | Height [mAU] | Area %  |
|--------|---------------|------|-------------|--------------|--------------|---------|
| 1      | 14.339        | BV   | 0.1966      | 81.53291     | 6.11455      | 4.5107  |
| 2      | 15.018        | VB   | 0.2278      | 1726.00415   | 113.87477    | 95.4893 |

Totals :                      1807.53706   119.98932

=====  
 \*\*\* End of Report \*\*\*

=====

|                                                                                             |                       |
|---------------------------------------------------------------------------------------------|-----------------------|
| Acq. Operator : 系统                                                                          | Seq. Line : 192       |
| Acq. Instrument : HPLC-1260                                                                 | Location : 95         |
| Injection Date : 9/15/2020 9:49:37 AM                                                       | Inj : 3               |
|                                                                                             | Inj Volume : 3.000 µl |
| Different Inj Volume from Sample Entry! Actual Inj Volume : 1.000 µl                        |                       |
| Acq. Method : D:\G527\FZ\20200822\YH 2020-09-11 23-16-57\11PA-30-0.5-1-2-220-JXL.M          |                       |
| Last changed : 9/15/2020 9:11:51 AM by 系统                                                   |                       |
| Analysis Method : E:\DATA\20201027\LC 2020-12-15 14-02-17\61PA_10_0.8_3.M (Sequence Method) |                       |
| Last changed : 12/15/2020 10:17:14 PM by SYSTEM                                             |                       |
| (modified after loading)                                                                    |                       |

Additional Info : Peak(s) manually integrated

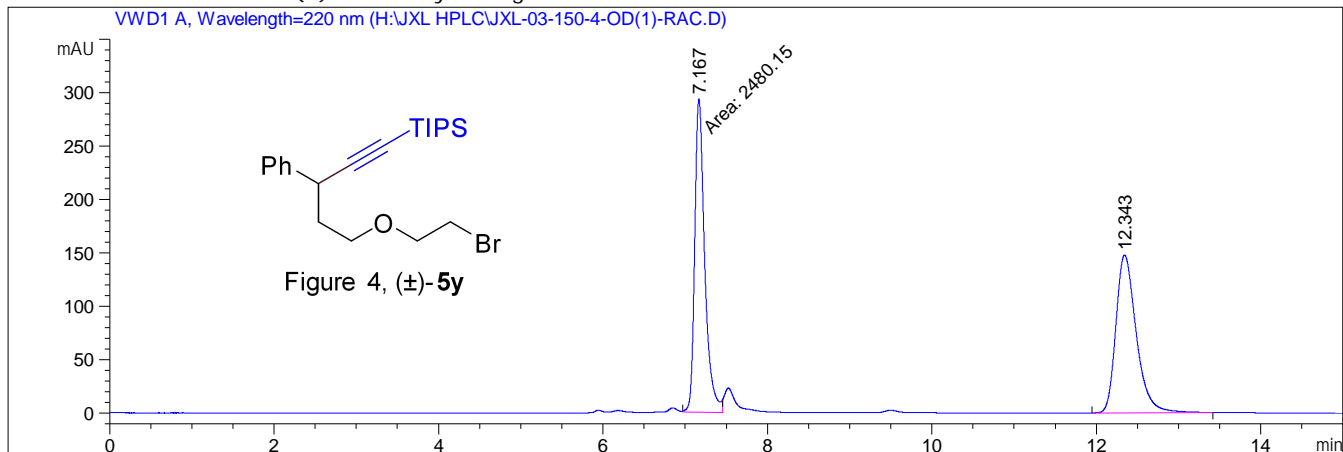

=====  
Area Percent Report  
=====

Sorted By : Signal  
Multiplier : 1.0000  
Dilution : 1.0000  
Do not use Multiplier & Dilution Factor with ISTDs

Signal 1: VWD1 A, Wavelength=220 nm

| Peak # | RetTime [min] | Type | Width [min] | Area [mAU*s] | Height [mAU] | Area %  |
|--------|---------------|------|-------------|--------------|--------------|---------|
| 1      | 7.167         | FM   | 0.1409      | 2480.15137   | 293.46741    | 49.4393 |
| 2      | 12.343        | BB   | 0.2629      | 2536.40210   | 147.66779    | 50.5607 |

Totals : 5016.55347 441.13519

=====  
\*\*\* End of Report \*\*\*

```
=====
Acq. Operator   : 系统                               Seq. Line : 102
Acq. Instrument : HPLC-1260                          Location  : 96
Injection Date  : 9/13/2020 8:02:04 PM                Inj       : 1
                                                    Inj Volume: 3.000 µl
Different Inj Volume from Sample Entry! Actual Inj Volume : 0.500 µl
Acq. Method     : D:\G527\FZ\20200822\YH 2020-09-11 23-16-57\11PA-30-0.5-1-2-220-JXL.M
Last changed    : 9/13/2020 7:58:29 PM by 系统
Analysis Method : E:\DATA\20201027\LC 2020-12-15 14-02-17\61PA_10_0.8_3.M (Sequence Method)
Last changed    : 12/15/2020 10:19:23 PM by SYSTEM
                (modified after loading)
Additional Info : Peak(s) manually integrated
```

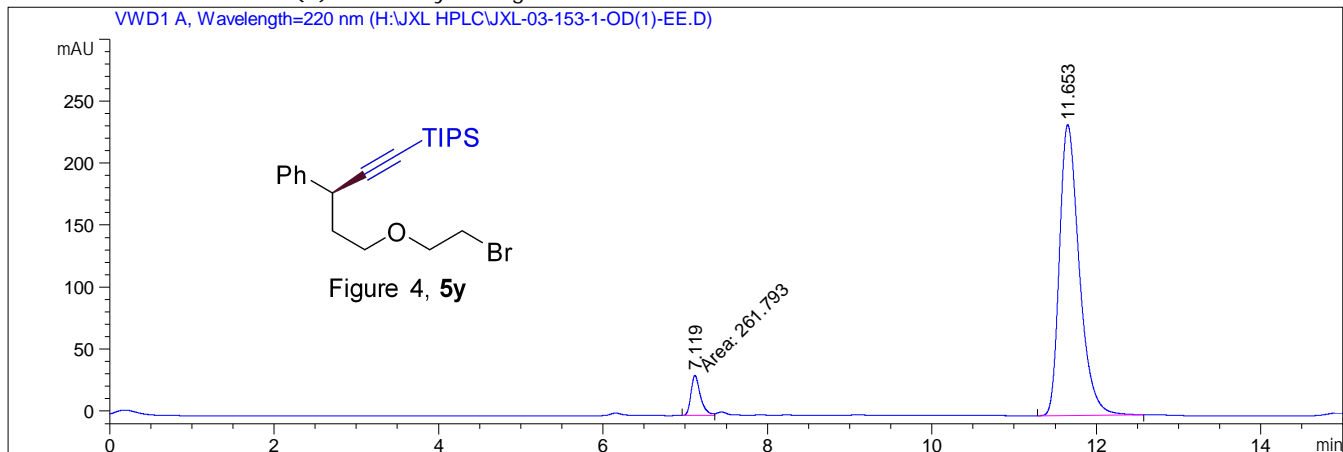

=====  
 Area Percent Report  
 =====

```
Sorted By      :      Signal
Multiplier     :      1.0000
Dilution       :      1.0000
Do not use Multiplier & Dilution Factor with ISTDs
```

Signal 1: VWD1 A, Wavelength=220 nm

| Peak # | RetTime [min] | Type | Width [min] | Area [mAU*s] | Height [mAU] | Area %  |
|--------|---------------|------|-------------|--------------|--------------|---------|
| 1      | 7.119         | FM   | 0.1345      | 261.79251    | 32.42925     | 6.2619  |
| 2      | 11.653        | BB   | 0.2565      | 3918.89722   | 234.48160    | 93.7381 |

Totals :                    4180.68973   266.91085

=====  
 \*\*\* End of Report \*\*\*

```
=====
Acq. Operator   : 系统                               Seq. Line :   29
Acq. Instrument : HPLC-1260                           Location  :   89
Injection Date  : 12/13/2020 11:16:29 AM              Inj       :    1
                                                    Inj Volume: 3.000 µl
Different Inj Volume from Sample Entry! Actual Inj Volume : 4.000 µl
Acq. Method     : D:\G527\FZ\20201127\YH 2020-12-12 20-24-28\01PA-45-0.5-1-6-220-JXL.M
Last changed    : 12/12/2020 9:24:33 PM by 系统
Analysis Method : E:\DATA\20201027\LC 2020-12-18 10-52-42\151PA_30_8_4.M (Sequence Method)
Last changed    : 12/18/2020 3:13:02 PM by SYSTEM
                  (modified after loading)
Additional Info : Peak(s) manually integrated
```

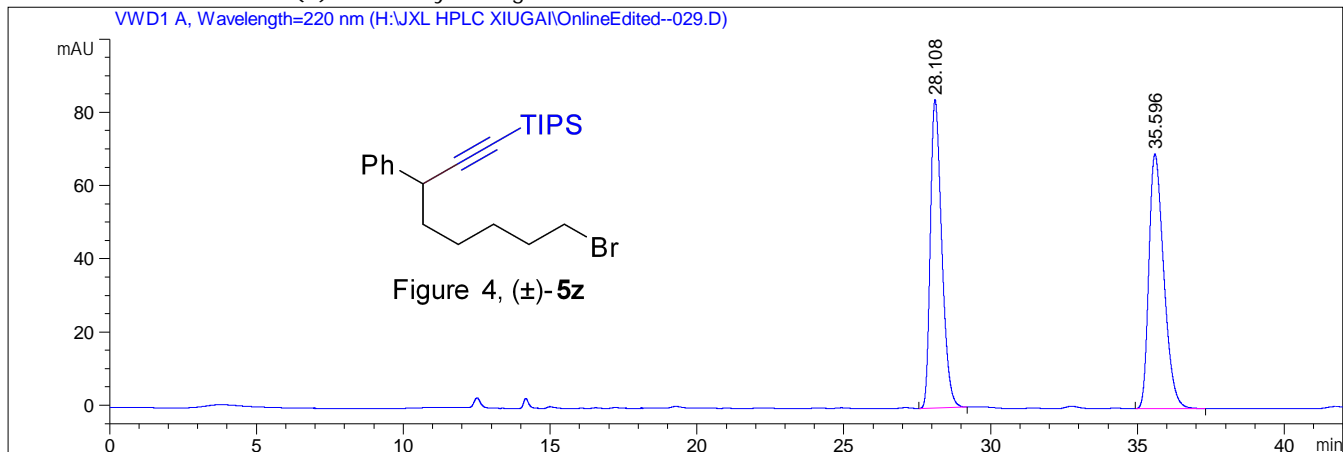

=====  
 Area Percent Report  
 =====

```
Sorted By      :      Signal
Multiplier     :      1.0000
Dilution       :      1.0000
Do not use Multiplier & Dilution Factor with ISTDs
```

Signal 1: VWD1 A, Wavelength=220 nm

| Peak # | RetTime [min] | Type | Width [min] | Area [mAU*s] | Height [mAU] | Area %  |
|--------|---------------|------|-------------|--------------|--------------|---------|
| 1      | 28.108        | BB   | 0.4169      | 2276.74316   | 84.21875     | 48.0828 |
| 2      | 35.596        | BB   | 0.5323      | 2458.30249   | 69.55943     | 51.9172 |

Totals :                    4735.04565   153.77818

=====  
 \*\*\* End of Report \*\*\*

=====

|                 |                         |            |            |
|-----------------|-------------------------|------------|------------|
| Acq. Operator   | : 系统                    | Seq. Line  | : 44       |
| Acq. Instrument | : HPLC-1260             | Location   | : 90       |
| Injection Date  | : 12/13/2020 8:54:29 PM | Inj        | : 1        |
|                 |                         | Inj Volume | : 3.000 µl |

Acq. Method : D:\G527\FZ\20201127\YH 2020-12-12 20-24-28\01PA-45-0.5-1-6-220-JXL.M  
Last changed : 12/12/2020 9:24:33 PM by 系统  
Analysis Method : E:\DATA\20201027\LC 2020-12-15 14-02-17\61PA\_10\_0.8\_3.M (Sequence Method)  
Last changed : 12/15/2020 10:22:57 PM by SYSTEM  
(modified after loading)

Additional Info : Peak(s) manually integrated

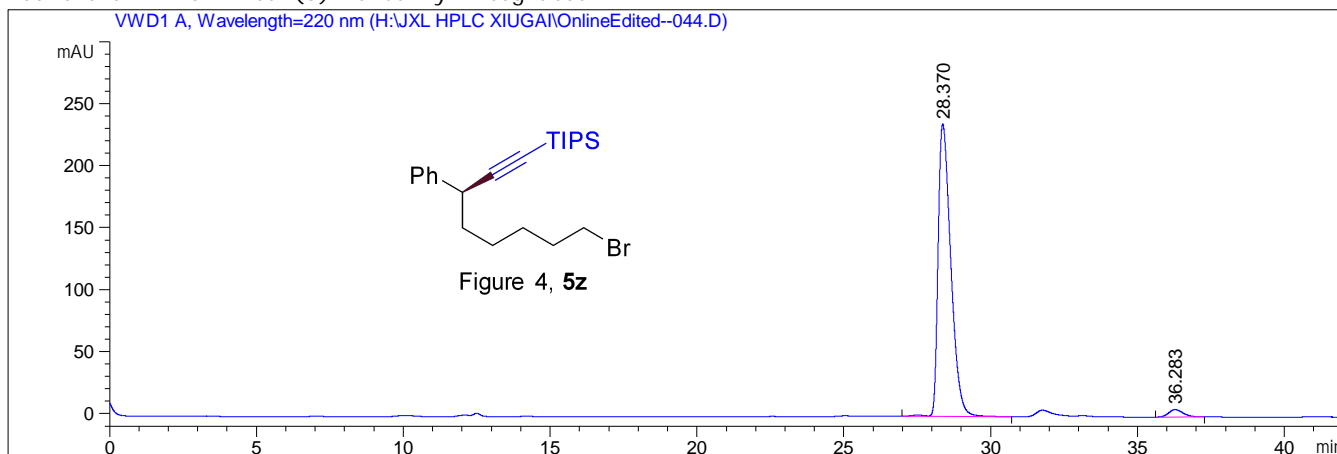

=====  
Area Percent Report  
=====

Sorted By : Signal  
Multiplier : 1.0000  
Dilution : 1.0000  
Do not use Multiplier & Dilution Factor with ISTDs

Signal 1: VWD1 A, Wavelength=220 nm

| Peak # | RetTime [min] | Type | Width [min] | Area [mAU*s] | Height [mAU] | Area %  |
|--------|---------------|------|-------------|--------------|--------------|---------|
| 1      | 28.370        | VB R | 0.4587      | 7076.32129   | 236.06902    | 97.1948 |
| 2      | 36.283        | BB   | 0.4036      | 204.23074    | 5.95462      | 2.8052  |

Totals : 7280.55203 242.02364

=====  
\*\*\* End of Report \*\*\*

=====  
Acq. Operator : 系统 Seq. Line : 6  
Acq. Instrument : HPLC-1260 Location : 81  
Injection Date : 9/20/2020 5:35:17 PM Inj : 1  
Inj Volume : 3.000 µl  
Different Inj Volume from Sample Entry! Actual Inj Volume : 2.000 µl  
Acq. Method : D:\JXL\20200920\YH 2020-09-20 14-51-06\01 PA-45-0.5-1-6-220-JXL.M  
Last changed : 9/20/2020 3:40:59 PM by 系统  
Analysis Method : E:\DATA\20210127\LC 2021-01-27 19-42-16\10I PA\_20\_1\_0\_3.MZWJ.M (Sequence Method)  
Last changed : 1/29/2021 4:34:03 PM by SYSTEM  
(modified after Loading)

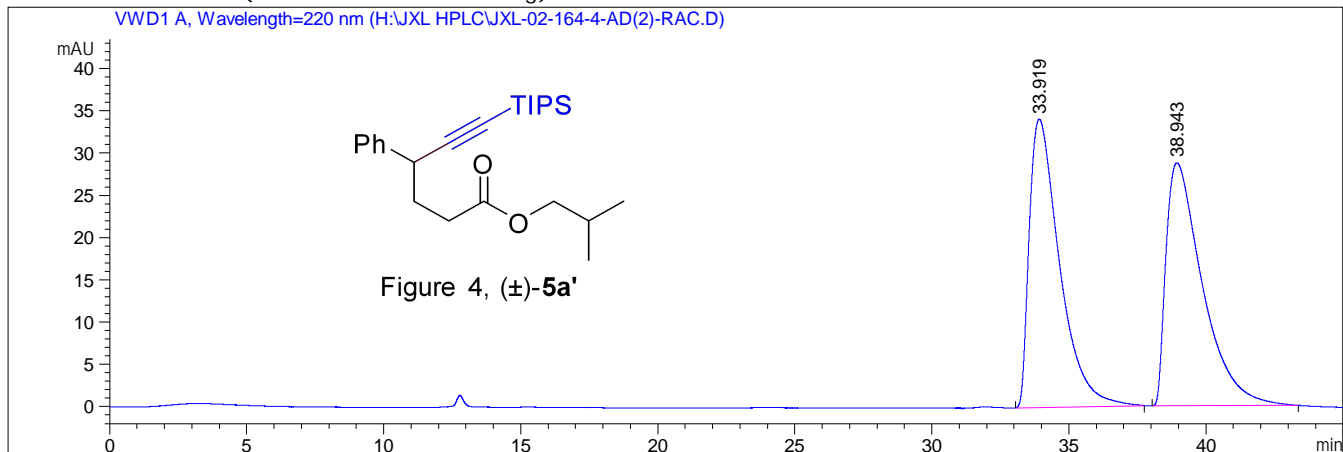

=====  
Area Percent Report  
=====

Sorted By : Signal  
Multiplier : 1.0000  
Dilution : 1.0000  
Do not use Multiplier & Dilution Factor with ISTDs

Signal 1: VWD1 A, Wavelength=220 nm

| Peak # | RetTime [min] | Type | Width [min] | Area [mAU*s] | Height [mAU] | Area %  |
|--------|---------------|------|-------------|--------------|--------------|---------|
| 1      | 33.919        | BB   | 0.9033      | 2623.93433   | 34.13412     | 49.6876 |
| 2      | 38.943        | BB   | 1.0816      | 2656.93164   | 28.77937     | 50.3124 |

Totals : 5280.86597 62.91348

=====  
\*\*\* End of Report \*\*\*

=====  
Acq. Operator : 系统 Seq. Line : 8  
Acq. Instrument : HPLC-1260 Location : 92  
Injection Date : 1/23/2021 1:14:05 PM Inj : 1  
Inj Volume : 3.000 µl  
Different Inj Volume from Sample Entry! Actual Inj Volume : 4.000 µl  
Acq. Method : D:\JXL\20210123\YH 2021-01-23 09-26-26\01PA-45-0.5-1-2-220-JXL.M  
Last changed : 1/23/2021 9:58:41 AM by 系统  
Analysis Method : E:\DATA\20210127\LC 2021-01-27 19-42-16\101PA\_20\_1.0\_3.MZWJ.M (Sequence Method)  
Last changed : 1/29/2021 4:32:32 PM by SYSTEM  
(modified after loading)  
Additional Info : Peak(s) manually integrated

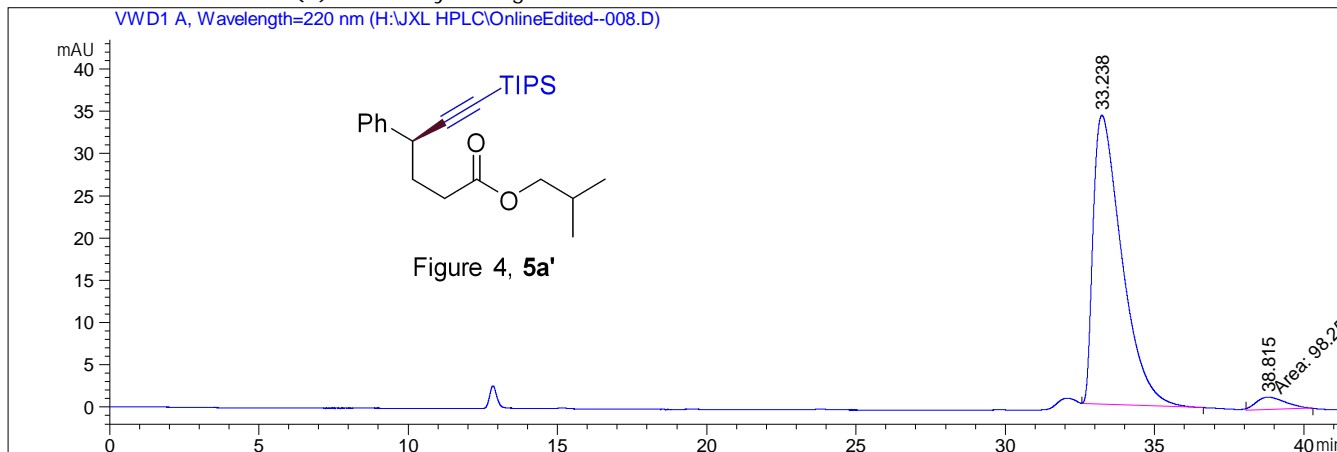

=====  
Area Percent Report  
=====

Sorted By : Signal  
Multiplier : 1.0000  
Dilution : 1.0000  
Do not use Multiplier & Dilution Factor with ISTDs

Signal 1: VWD1 A, Wavelength=220 nm

| Peak # | RetTime [min] | Type | Width [min] | Area [mAU*s] | Height [mAU] | Area %  |
|--------|---------------|------|-------------|--------------|--------------|---------|
| 1      | 33.238        | BB   | 0.7824      | 2280.43457   | 34.18036     | 95.8695 |
| 2      | 38.815        | MM   | 1.1224      | 98.25251     | 1.45902      | 4.1305  |

Totals : 2378.68708 35.63938

=====  
\*\*\* End of Report \*\*\*



```

=====
Acq. Operator   : 系统                      Seq. Line : 10
Acq. Instrument : HPLC-1260                 Locati on : 95
Injection Date  : 12/12/2020 11:47:56 PM   Inj       : 1
                                                Inj Volume: 3.000 µl

Acq. Method     : D:\G527\FZ\20201127\YH 2020-12-12 20-24-28\11PA-20-0.5-1-6-220-JXL.M
Last changed    : 12/12/2020 11:16:10 PM by 系统
Analysis Method : E:\DATA\20201027\LC 2020-12-15 14-02-17\61PA_10_0.8_3.M (Sequence Method)
Last changed    : 12/15/2020 10:41:58 PM by SYSTEM
                  (modified after loading)
Additional Info : Peak(s) manually integrated
  
```

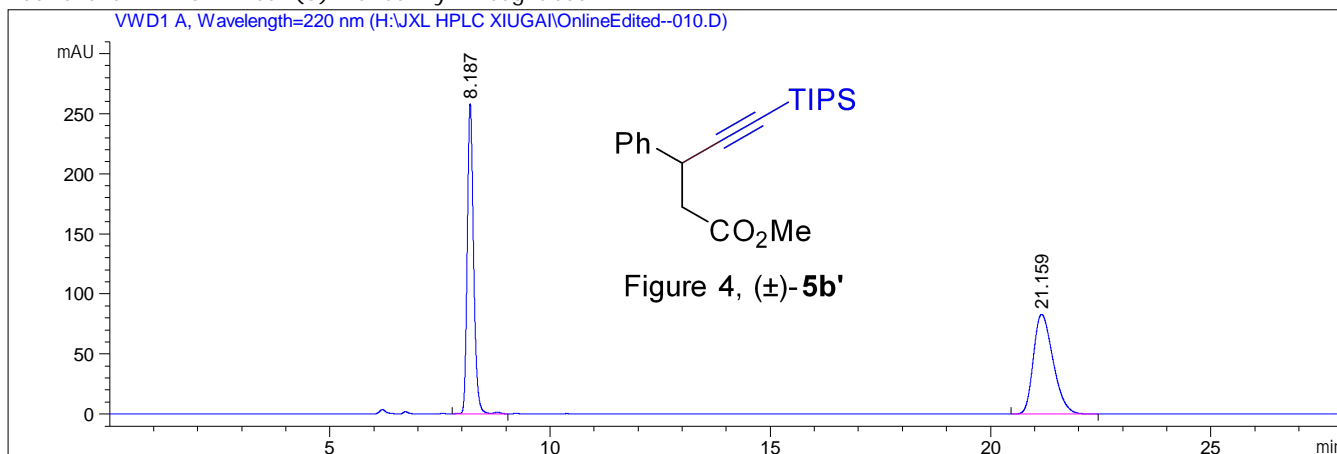

=====  
 Area Percent Report  
 =====

```

Sorted By      :      Signal
Multipl ier   :      1.0000
Diluti on     :      1.0000
Do not use Multipl ier & Diluti on Factor with ISTDs
  
```

Signal 1: VWD1 A, Wavelength=220 nm

| Peak # | RetTime [min] | Type | Width [min] | Area [mAU*s] | Height [mAU] | Area %  |
|--------|---------------|------|-------------|--------------|--------------|---------|
| 1      | 8.187         | BV R | 0.1524      | 2576.23950   | 258.17044    | 49.9962 |
| 2      | 21.159        | BB   | 0.4717      | 2576.62598   | 83.11460     | 50.0038 |

Totals :                    5152.86548   341.28504

=====  
 \*\*\* End of Report \*\*\*





=====  
Acq. Operator : 系统 Seq. Line : 7  
Acq. Instrument : HPLC-1260 Location : 94  
Injection Date : 12/12/2020 10:27:40 PM Inj : 1  
Inj Volume : 3.000 µl  
Different Inj Volume from Sample Entry! Actual Inj Volume : 1.000 µl  
Acq. Method : D:\G527\FZ\20201127\YH 2020-12-12 20-24-28\1PA-20-0.5-1-6-220-JXL.M  
Last changed : 12/12/2020 10:25:23 PM by 系统  
Analysis Method : E:\DATA\20201027\LC 2020-12-15 14-02-17\61PA\_10\_0.8\_3.M (Sequence Method)  
Last changed : 12/15/2020 10:51:28 PM by SYSTEM  
(modified after loading)  
Additional Info : Peak(s) manually integrated

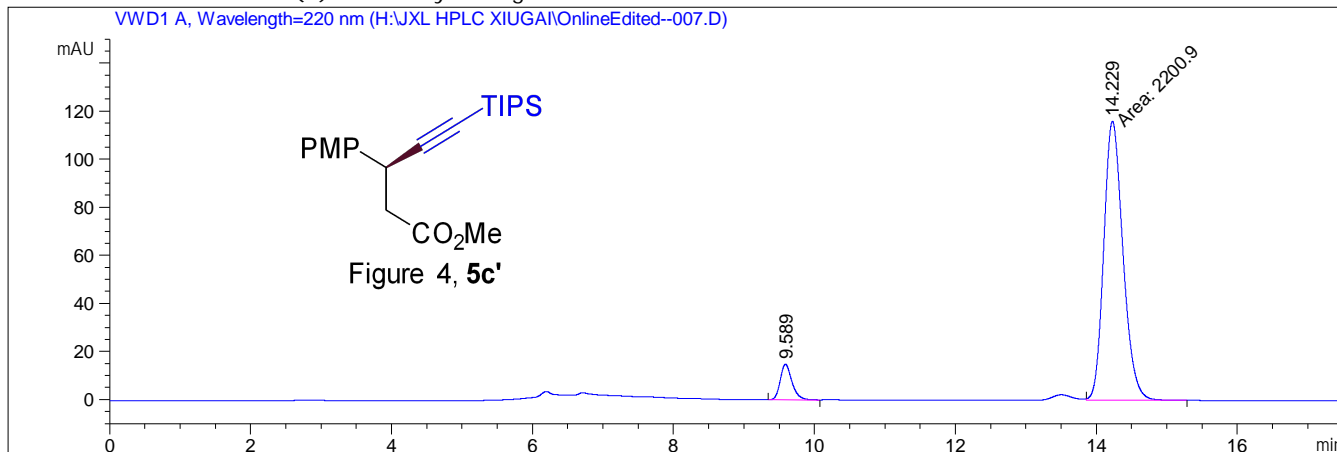

=====  
Area Percent Report  
=====

Sorted By : Signal  
Multiplier : 1.0000  
Dilution : 1.0000  
Do not use Multiplier & Dilution Factor with ISTDs

Signal 1: VWD1 A, Wavelength=220 nm

| Peak # | RetTime [min] | Type | Width [min] | Area [mAU*s] | Height [mAU] | Area %  |
|--------|---------------|------|-------------|--------------|--------------|---------|
| 1      | 9.589         | BB   | 0.1754      | 170.47371    | 14.79596     | 7.1888  |
| 2      | 14.229        | FM   | 0.3158      | 2200.89990   | 116.16302    | 92.8112 |

Totals : 2371.37361 130.95898

=====  
\*\*\* End of Report \*\*\*  
=====

=====

|                                        |                       |
|----------------------------------------|-----------------------|
| Acq. Operator : 系统                     | Seq. Line : 32        |
| Acq. Instrument : HPLC-1260            | Location : 71         |
| Injection Date : 12/13/2020 1:51:07 PM | Inj : 1               |
|                                        | Inj Volume : 3.000 µl |

Different Inj Volume from Sample Entry! Actual Inj Volume : 2.000 µl

|                                                                                            |
|--------------------------------------------------------------------------------------------|
| Acq. Method : D:\G527\FZ\20201127\YH 2020-12-12 20-24-28\01PA-40-0.5-1-6-220-JXL.M         |
| Last changed : 12/12/2020 9:26:27 PM by 系统                                                 |
| Analysis Method : E:\DATA\20201027\LC 2020-12-18 10-52-42\151PA_30_8_4.M (Sequence Method) |
| Last changed : 12/18/2020 3:18:06 PM by SYSTEM<br>(modified after loading)                 |

Additional Info : Peak(s) manually integrated

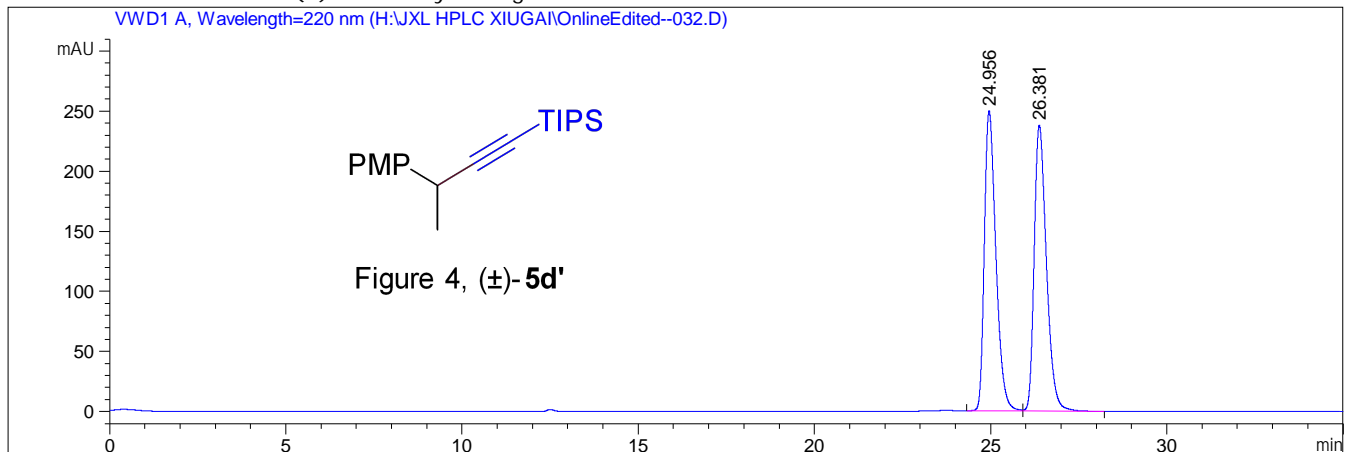

=====  
Area Percent Report  
=====

|            |   |        |
|------------|---|--------|
| Sorted By  | : | Signal |
| Multiplier | : | 1.0000 |
| Dilution   | : | 1.0000 |

Do not use Multiplier & Dilution Factor with ISTDs

Signal 1: VWD1 A, Wavelength=220 nm

| Peak # | RetTime [min] | Type | Width [min] | Area [mAU*s] | Height [mAU] | Area %  |
|--------|---------------|------|-------------|--------------|--------------|---------|
| 1      | 24.956        | BV   | 0.3465      | 5686.15039   | 249.83354    | 49.7768 |
| 2      | 26.381        | VB   | 0.3651      | 5737.15039   | 238.07536    | 50.2232 |

Totals :                      1.14233e4    487.90891

=====  
\*\*\* End of Report \*\*\*

```

=====
Acq. Operator   : 系统                      Seq. Line : 41
Acq. Instrument : HPLC-1260                 Location  : 72
Injection Date  : 12/13/2020 7:34:17 PM     Inj       : 1
                                                Inj Volume: 3.000 µl
Different Inj Volume from Sample Entry! Actual Inj Volume : 1.000 µl
Acq. Method    : D:\G527\FZ\20201127\YH 2020-12-12 20-24-28\OIPA-40-0.5-1-6-220-JXL.M
Last changed   : 12/13/2020 8:07:11 PM by 系统
                                                (modified after Loading)
Analysis Method : E:\DATA\20201027\LC 2020-12-15 14-02-17\6IPA_10_0.8_3.M (Sequence Method)
Last changed   : 12/15/2020 10:54:24 PM by SYSTEM
                                                (modified after Loading)
Additional Info : Peak(s) manually integrated
=====

```

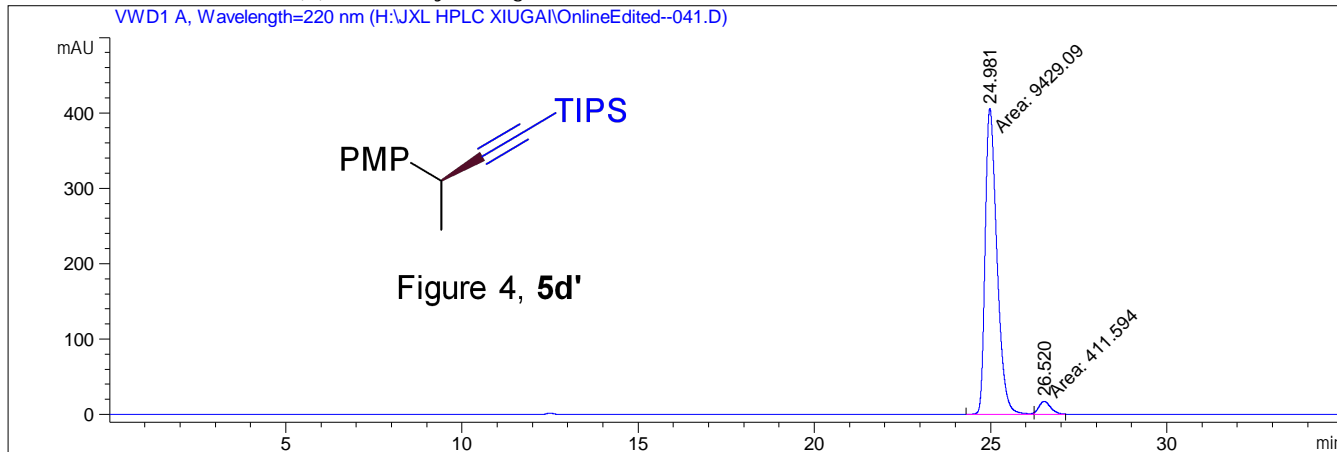

Area Percent Report

```

Sorted By      : Signal
Multiplier    : 1.0000
Dilution      : 1.0000
Do not use Multiplier & Dilution Factor with ISTDs
=====

```

Signal 1: VWD1 A, Wavelength=220 nm

| Peak # | RetTime [min] | Type | Width [min] | Area [mAU*s] | Height [mAU] | Area %  |
|--------|---------------|------|-------------|--------------|--------------|---------|
| 1      | 24.981        | MF   | 0.3870      | 9429.09473   | 406.02753    | 95.8174 |
| 2      | 26.520        | FM   | 0.3954      | 411.59427    | 17.34928     | 4.1826  |

Totals :                      9840.68900    423.37681

\*\*\* End of Report \*\*\*

=====  
Acq. Operator : 系统 Seq. Line : 27  
Acq. Instrument : HPLC-1260 Location : 81  
Injection Date : 3/5/2021 8:58:56 PM Inj : 1  
Inj Volume : 3.000 µl  
Different Inj Volume from Sample Entry! Actual Inj Volume : 2.000 µl  
Acq. Method : D:\ZHH\20210304\YH 2021-03-05 08-58-35\01PA-45-0.5-1-2-220-JXL.M  
Last changed : 3/5/2021 9:34:52 PM by 系统  
(modified after Loading)  
Analysis Method : E:\DATA\20210310\LC 2021-03-10 20-00-42\01PA\_30\_0.5\_2 H.M (Sequence Method)  
Last changed : 3/10/2021 10:33:44 PM by SYSTEM  
(modified after Loading)  
Additional Info : Peak(s) manually integrated

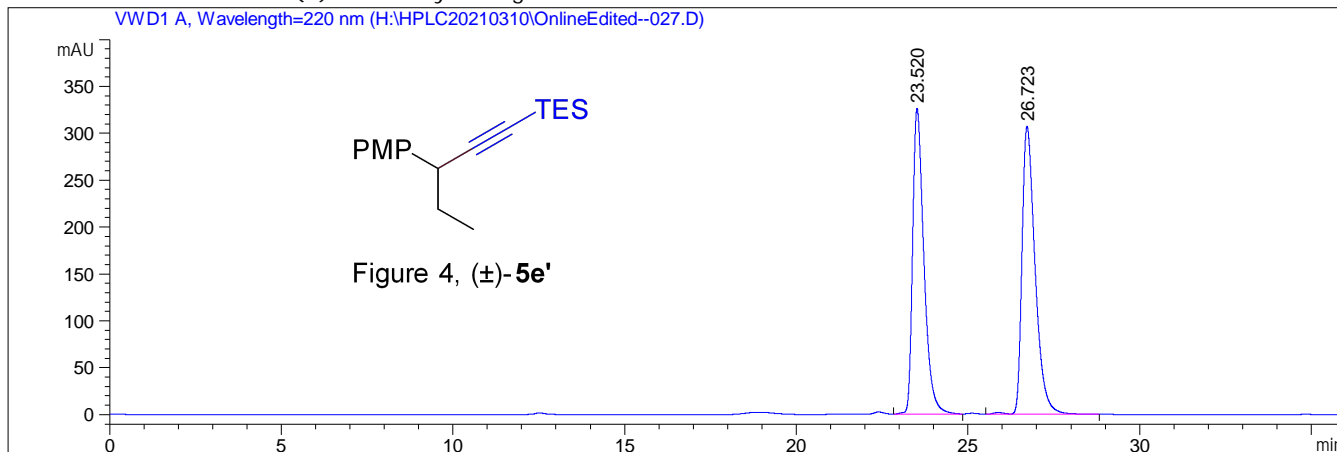

=====  
Area Percent Report  
=====

Sorted By : Signal  
Multiplier : 1.0000  
Dilution : 1.0000  
Do not use Multiplier & Dilution Factor with ISTDs

Signal 1: VWD1 A, Wavelength=220 nm

| Peak # | RetTime [min] | Type | Width [min] | Area [mAU*s] | Height [mAU] | Area %  |
|--------|---------------|------|-------------|--------------|--------------|---------|
| 1      | 23.520        | BB   | 0.3475      | 7443.00439   | 325.79547    | 47.6595 |
| 2      | 26.723        | VB R | 0.3985      | 8174.02979   | 307.09445    | 52.3405 |

Totals : 1.56170e4 632.88992

=====  
\*\*\* End of Report \*\*\*

```

=====
Acq. Operator   : 系统                               Seq. Line :   24
Acq. Instrument : HPLC-1260                           Location  :   93
Injection Date  : 3/5/2021 7:09:43 PM                 Inj       :    1
                                                    Inj Volume: 3.000 µl
Different Inj Volume from Sample Entry! Actual Inj Volume : 0.200 µl
Acq. Method     : D:\ZHH\20210304\YH 2021-03-05 08-58-35\01PA-45-0.5-1-2-220-JXL.M
Last changed    : 3/5/2021 7:39:28 PM by 系统
                  (modified after Loading)
Analysis Method : E:\DATA\20210310\LC 2021-03-10 20-00-42\01PA_30_0.5_2 H.M (Sequence Method)
Last changed    : 3/10/2021 10:35:06 PM by SYSTEM
                  (modified after Loading)
Additional Info : Peak(s) manually integrated
  
```

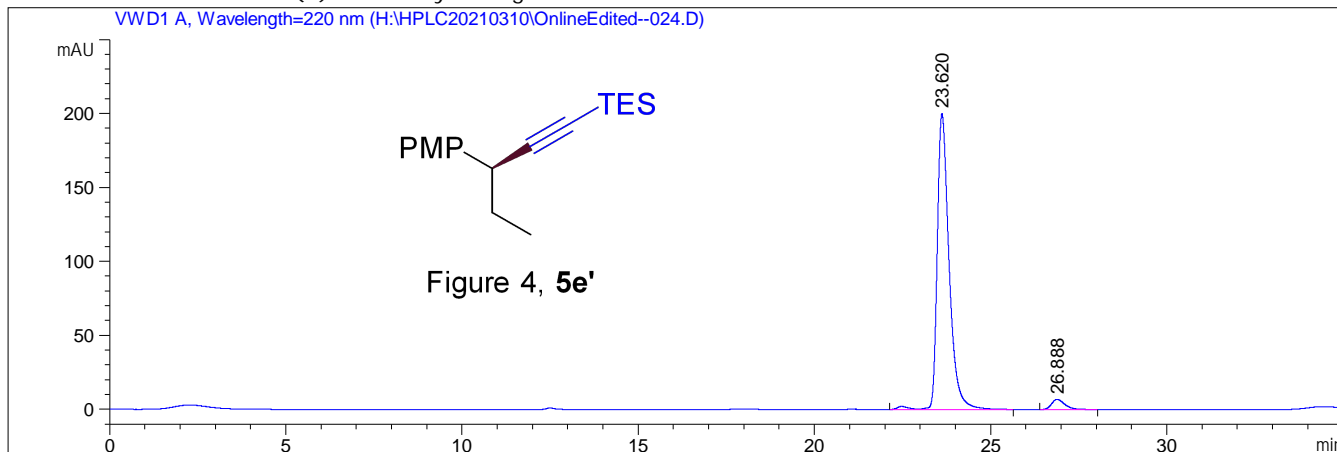

=====  
 Area Percent Report  
 =====

```

Sorted By      :      Signal
Multiplier     :      1.0000
Dilution       :      1.0000
Do not use Multiplier & Dilution Factor with ISTDs
  
```

Signal 1: VWD1 A, Wavelength=220 nm

| Peak # | RetTime [min] | Type | Width [min] | Area [mAU*s] | Height [mAU] | Area %  |
|--------|---------------|------|-------------|--------------|--------------|---------|
| 1      | 23.620        | VB R | 0.3499      | 4690.87891   | 200.07715    | 96.2894 |
| 2      | 26.888        | BB   | 0.3508      | 180.76852    | 6.95428      | 3.7106  |

Totals :                    4871.64743   207.03143

=====  
 \*\*\* End of Report \*\*\*





=====  
Acq. Operator : 系统 Seq. Line : 26  
Acq. Instrument : HPLC-1260 Location : 94  
Injection Date : 3/5/2021 8:22:32 PM Inj : 1  
Inj Volume : 3.000 µl  
Different Inj Volume from Sample Entry! Actual Inj Volume : 0.300 µl  
Acq. Method : D:\ZHH\20210304\YH 2021-03-05 08-58-35\01PA-45-0.5-1-2-220-JXL.M  
Last changed : 3/5/2021 7:39:28 PM by 系统  
Analysis Method : E:\DATA\20210310\LC 2021-03-10 20-00-42\01PA\_30\_0.5\_2 H.M (Sequence Method)  
Last changed : 3/10/2021 10:37:09 PM by SYSTEM  
(modified after Loading)

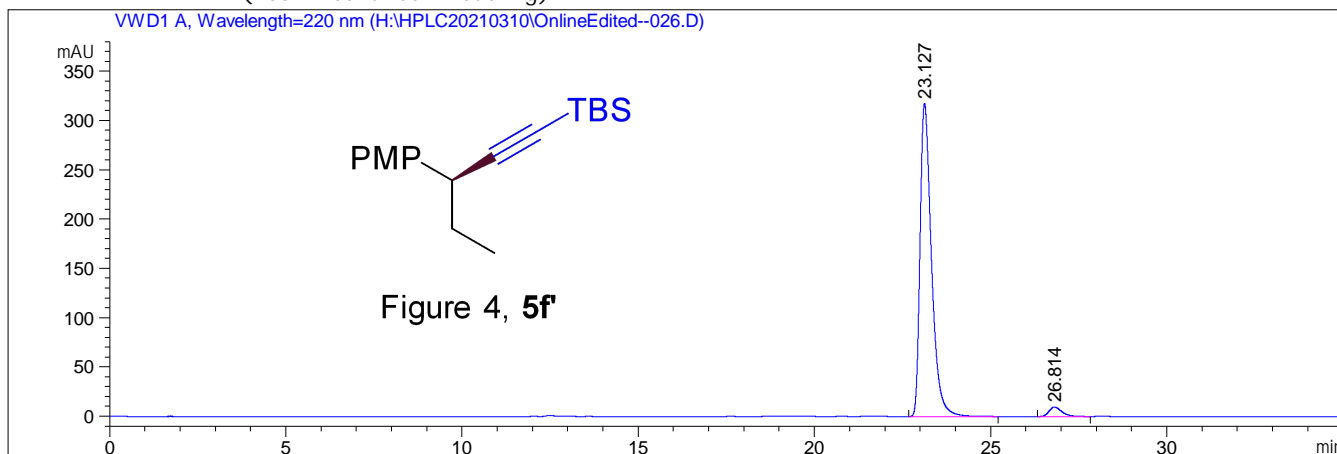

=====  
Area Percent Report  
=====

Sorted By : Signal  
Multiplier : 1.0000  
Dilution : 1.0000  
Do not use Multiplier & Dilution Factor with ISTDs

Signal 1: VWD1 A, Wavelength=220 nm

| Peak # | RetTime [min] | Type | Width [min] | Area [mAU*s] | Height [mAU] | Area %  |
|--------|---------------|------|-------------|--------------|--------------|---------|
| 1      | 23.127        | BB   | 0.3407      | 7151.65332   | 317.55710    | 96.6746 |
| 2      | 26.814        | BB   | 0.3599      | 245.99886    | 9.61679      | 3.3254  |

Totals : 7397.65218 327.17389

=====  
\*\*\* End of Report \*\*\*

=====  
Acq. Operator : 系统 Seq. Line : 15  
Acq. Instrument : HPLC-1260 Location : 97  
Injection Date : 12/13/2020 2:21:41 AM Inj : 1  
Inj Volume : 3.000 µl  
Different Inj Volume from Sample Entry! Actual Inj Volume : 8.000 µl  
Acq. Method : D:\G527\FZ\20201127\YH 2020-12-12 20-24-28\01PA-40-0.8-1-6-220-JXL.M  
Last changed : 12/13/2020 1:42:46 AM by 系统  
Analysis Method : E:\DATA\20201027\LC 2020-12-18 10-52-42\151PA\_30\_8\_4.M (Sequence Method)  
Last changed : 12/18/2020 3:22:43 PM by SYSTEM  
(modified after loading)  
Additional Info : Peak(s) manually integrated

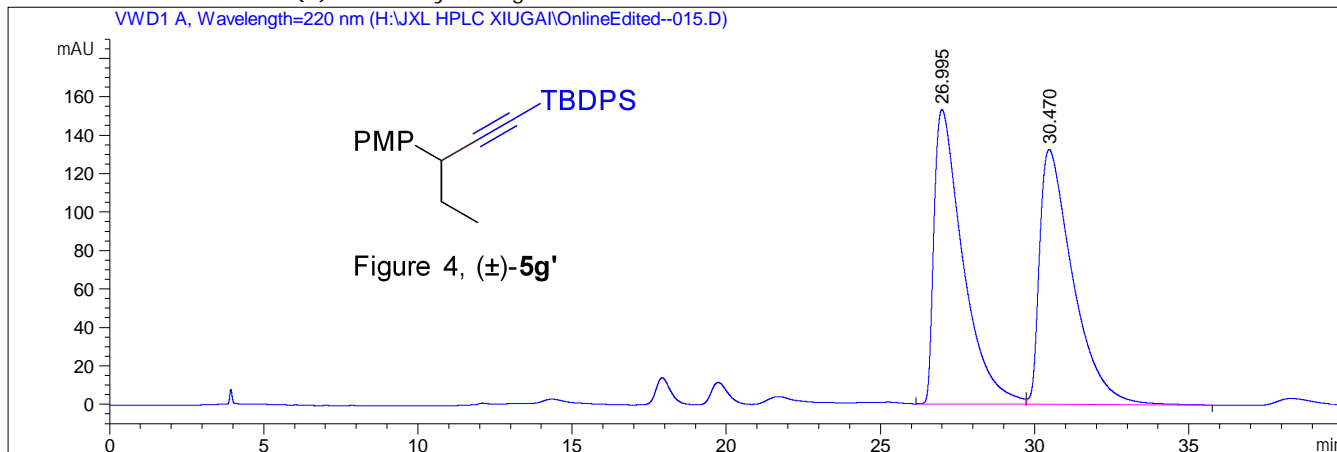

=====  
Area Percent Report  
=====

Sorted By : Signal  
Multiplier : 1.0000  
Dilution : 1.0000  
Do not use Multiplier & Dilution Factor with ISTDs

Signal 1: VWD1 A, Wavelength=220 nm

| Peak # | RetTime [min] | Type | Width [min] | Area [mAU*s] | Height [mAU] | Area %  |
|--------|---------------|------|-------------|--------------|--------------|---------|
| 1      | 26.995        | BV   | 0.9186      | 9964.35254   | 153.24321    | 50.1070 |
| 2      | 30.470        | VB   | 1.0340      | 9921.79297   | 132.51718    | 49.8930 |

Totals : 1.98861e4 285.76039

=====  
\*\*\* End of Report \*\*\*  
=====

```

=====
Acq. Operator   : 系统                               Seq. Line :   14
Acq. Instrument : HPLC-1260                           Location  :    98
Injection Date  : 12/13/2020 1:40:07 AM                Inj       :    1
                                                    Inj Volume: 3.000 µl
Different Inj Volume from Sample Entry! Actual Inj Volume : 5.000 µl
Acq. Method     : D:\G527\FZ\20201127\YH 2020-12-12 20-24-28\01PA-40-0.8-1-6-220-JXL.M
Last changed    : 12/13/2020 1:42:46 AM by 系统
                  (modified after Loading)
Analysis Method : E:\DATA\20201027\LC 2020-12-15 14-02-17\61PA_10_0.8_3.M (Sequence Method)
Last changed    : 12/15/2020 11:00:35 PM by SYSTEM
                  (modified after Loading)
Additional Info  : Peak(s) manually integrated
  
```

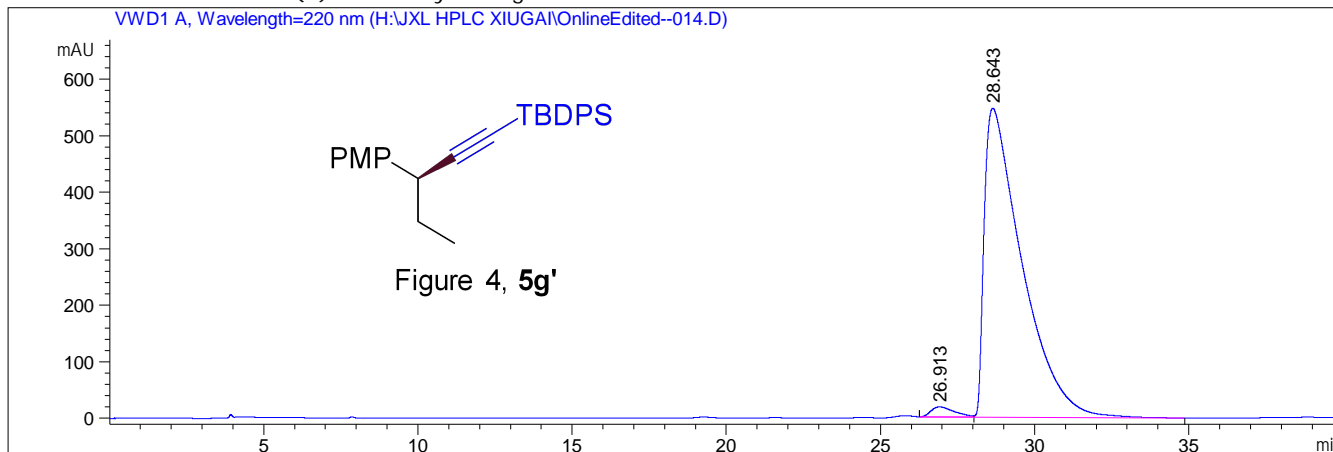

Area Percent Report

```

=====
Sorted By      :      Signal
Multiplier     :      1.0000
Dilution       :      1.0000
Do not use Multiplier & Dilution Factor with ISTDs
  
```

Signal 1: VWD1 A, Wavelength=220 nm

| Peak # | RetTime [min] | Type | Width [min] | Area [mAU*s] | Height [mAU] | Area %  |
|--------|---------------|------|-------------|--------------|--------------|---------|
| 1      | 26.913        | BV E | 0.6800      | 925.29993    | 17.77107     | 1.9496  |
| 2      | 28.643        | VB R | 1.1901      | 4.65365e4    | 546.39746    | 98.0504 |

Totals :                      4.74618e4    564.16853

\*\*\* End of Report \*\*\*

```

=====
Acq. Operator   : 系统                      Seq. Line :   27
Acq. Instrument : HPLC-1260                 Location  :    75
Injection Date  : 12/13/2020 9:15:35 AM     Inj       :    1
                                           Inj Volume: 3.000 µl

Acq. Method    : D:\G527\FZ\20201127\YH 2020-12-12 20-24-28\OIPA-60-0.5-1-6-220-JXL.M
Last changed   : 12/13/2020 10:16:07 AM by 系统
                                           (modified after loading)

Analysis Method : C:\CHEM32\1\METHODS\151PA_30_8_4.M
Last changed   : 12/19/2020 9:38:39 AM by SYSTEM
                                           (modified after loading)

Additional Info : Peak(s) manually integrated
  
```

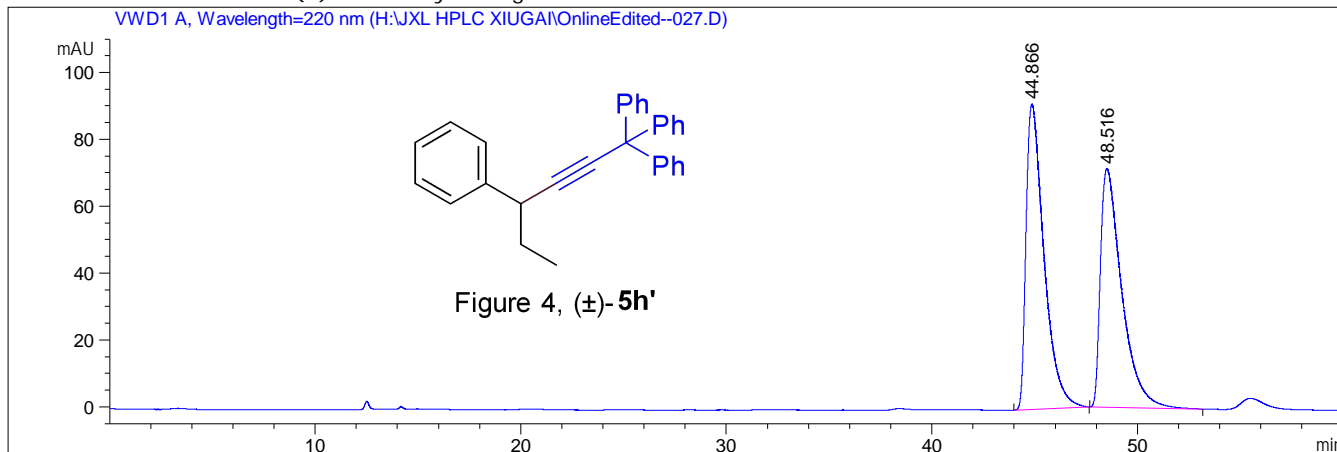

=====  
 Area Percent Report  
 =====

```

Sorted By       :      Signal
Multiplier     :      1.0000
Dilution       :      1.0000
Do not use Multiplier & Dilution Factor with ISTDs
  
```

Signal 1: VWD1 A, Wavelength=220 nm

| Peak # | RetTime [min] | Type | Width [min] | Area [mAU*s] | Height [mAU] | Area %  |
|--------|---------------|------|-------------|--------------|--------------|---------|
| 1      | 44.866        | BB   | 0.8906      | 5530.87402   | 91.31907     | 51.8735 |
| 2      | 48.516        | BB   | 1.0003      | 5131.35156   | 71.41467     | 48.1265 |

Totals :                                  1.06622e4    162.73374

=====  
 \*\*\* End of Report \*\*\*

```
=====
Acq. Operator   : 系统                               Seq. Line :   38
Acq. Instrument : HPLC-1260                           Location  :    76
Injection Date  : 12/13/2020 5:29:55 PM                Inj       :    1
                                                    Inj Volume: 3.000 µl
Different Inj Volume from Sample Entry! Actual Inj Volume : 6.000 µl
Acq. Method     : D:\G527\FZ\20201127\YH 2020-12-12 20-24-28\01PA-60-0.5-1-6-220-JXL.M
Last changed    : 12/13/2020 11:18:35 AM by 系统
Analysis Method : E:\DATA\20201027\LC 2020-12-15 14-02-17\101PA_20_1.0_4.ZWJ.M (Sequence
Method)
Last changed    : 12/16/2020 10:24:22 AM by SYSTEM
(modified after loading)
Additional Info  : Peak(s) manually integrated
```

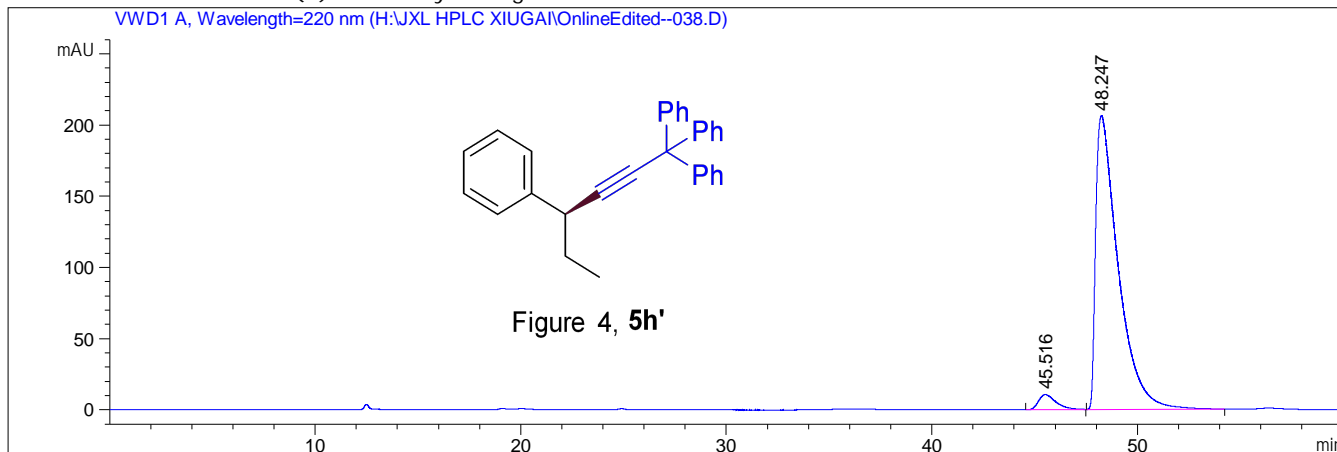

=====  
 Area Percent Report  
 =====

```
Sorted By      :      Signal
Multiplier     :      1.0000
Dilution       :      1.0000
Do not use Multiplier & Dilution Factor with ISTDs
```

Signal 1: VWD1 A, Wavelength=220 nm

| Peak # | RetTime [min] | Type | Width [min] | Area [mAU*s] | Height [mAU] | Area %  |
|--------|---------------|------|-------------|--------------|--------------|---------|
| 1      | 45.516        | BB   | 0.6972      | 631.42139    | 10.64241     | 3.8816  |
| 2      | 48.247        | BB   | 1.0764      | 1.56356e4    | 206.36812    | 96.1184 |

Totals :                    1.62670e4    217.01053

=====  
 \*\*\* End of Report \*\*\*







=====  
Acq. Operator : 系统 Seq. Line : 69  
Acq. Instrument : HPLC-1260 Location : 73  
Injection Date : 10/31/2020 4:30:26 AM Inj : 1  
Inj Volume : 3.000 µl  
Different Inj Volume from Sample Entry! Actual Inj Volume : 0.800 µl  
Acq. Method : D:\G527\FZ\20201026\YH 2020-10-29 08-35-49\0.51PA-60-0.5-1-6-220-JXL.M  
Last changed : 10/30/2020 11:25:02 PM by 系统  
Analysis Method : E:\DATA\20201027\LC 2020-12-18 10-52-42\151PA\_30\_8\_4.M (Sequence Method)  
Last changed : 12/18/2020 3:29:11 PM by SYSTEM  
(modified after Loading)

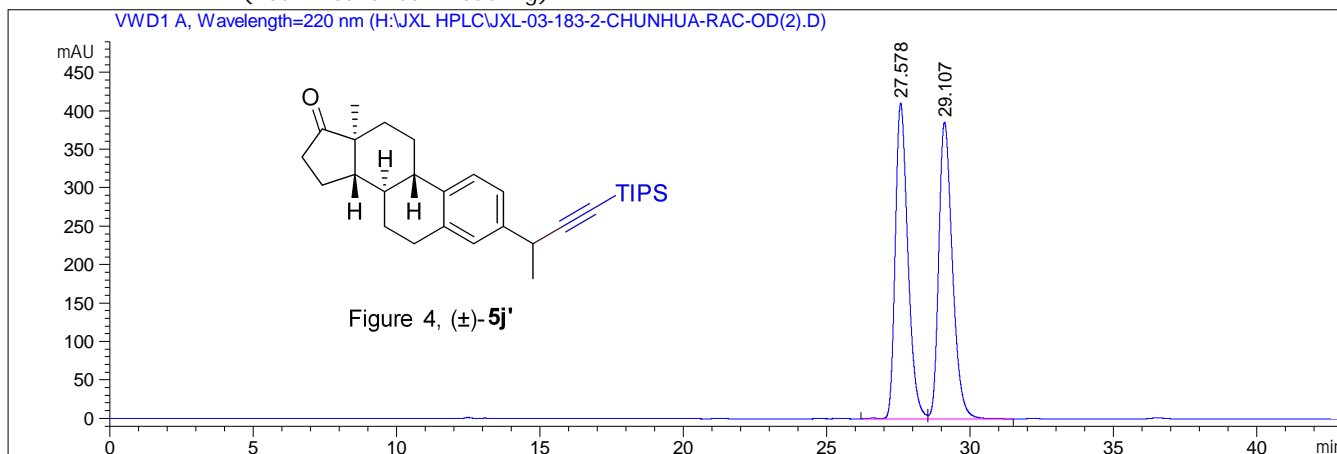

=====  
Area Percent Report  
=====

Sorted By : Signal  
Multiplier : 1.0000  
Dilution : 1.0000  
Do not use Multiplier & Dilution Factor with ISTDs

Signal 1: VWD1 A, Wavelength=220 nm

| Peak # | RetTime [min] | Type | Width [min] | Area [mAU*s] | Height [mAU] | Area %  |
|--------|---------------|------|-------------|--------------|--------------|---------|
| 1      | 27.578        | VR   | 0.4689      | 1.25377e4    | 410.39276    | 49.5354 |
| 2      | 29.107        | VB   | 0.5077      | 1.27729e4    | 385.89130    | 50.4646 |

Totals : 2.53106e4 796.28406

=====  
\*\*\* End of Report \*\*\*

=====  
Acq. Operator : 系统 Seq. Line : 70  
Acq. Instrument : HPLC-1260 Location : 71  
Injection Date : 10/31/2020 5:31:56 AM Inj : 1  
Inj Volume : 3.000 µl  
Different Inj Volume from Sample Entry! Actual Inj Volume : 0.500 µl  
Acq. Method : D:\G527\FZ\20201026\YH 2020-10-29 08-35-49\0.51PA-60-0.5-1-6-220-JXL.M  
Last changed : 10/30/2020 11:25:02 PM by 系统  
Analysis Method : E:\DATA\20201027\LC 2020-12-15 14-02-17\101PA\_20\_1\_0\_4.ZWJ.M (Sequence Method)  
Last changed : 12/16/2020 10:35:31 AM by SYSTEM  
(modified after loading)  
Additional Info : Peak(s) manually integrated

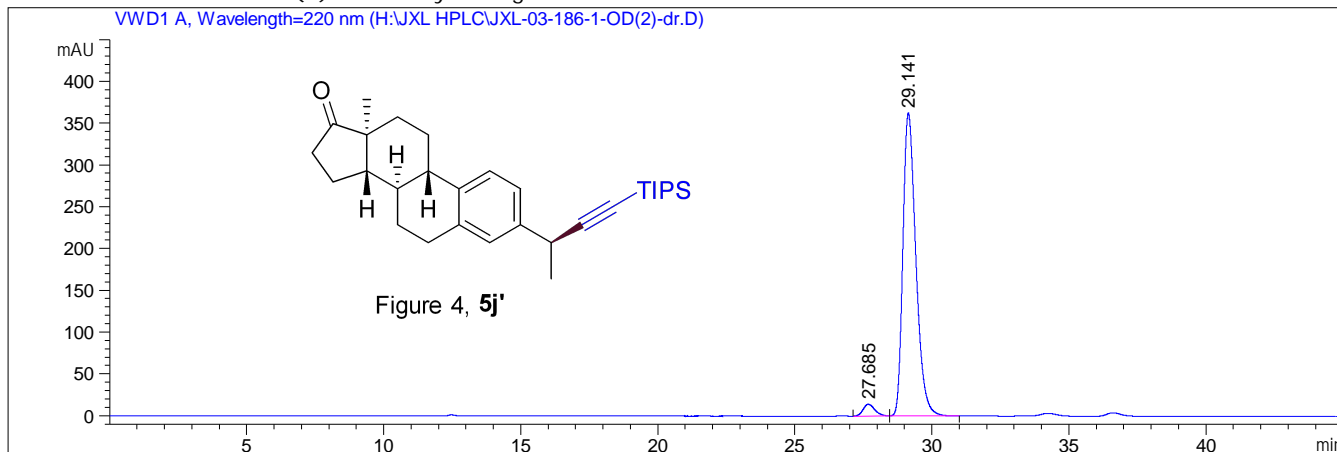

=====  
Area Percent Report  
=====

Sorted By : Signal  
Multiplier : 1.0000  
Dilution : 1.0000  
Do not use Multiplier & Dilution Factor with ISTDs

Signal 1: VWD1 A, Wavelength=220 nm

| Peak # | RetTime [min] | Type | Width [min] | Area [mAU*s] | Height [mAU] | Area %  |
|--------|---------------|------|-------------|--------------|--------------|---------|
| 1      | 27.685        | BB   | 0.4149      | 415.06985    | 14.10046     | 3.3649  |
| 2      | 29.141        | BB   | 0.5068      | 1.19203e4    | 362.34137    | 96.6351 |

Totals : 1.23354e4 376.44183

=====  
\*\*\* End of Report \*\*\*

```

=====
Acq. Operator   : 系统                               Seq. Line :   71
Acq. Instrument : HPLC-1260                          Location  :   72
Injection Date  : 10/31/2020 6:33:24 AM              Inj       :    1
                                                    Inj Volume: 3.000 µl
Different Inj Volume from Sample Entry! Actual Inj Volume : 0.500 µl
Acq. Method     : D:\G527\FZ\20201026\YH 2020-10-29 08-35-49\0.51PA-60-0.5-1-6-220-JXL.M
Last changed    : 10/30/2020 11:25:02 PM by 系统
Analysis Method : E:\DATA\20201027\LC 2020-12-15 14-02-17\101PA_20_1.0_4.ZWJ.M (Sequence
Method)
Last changed    : 12/16/2020 10:38:02 AM by SYSTEM
(modified after loading)
Additional Info  : Peak(s) manually integrated
  
```

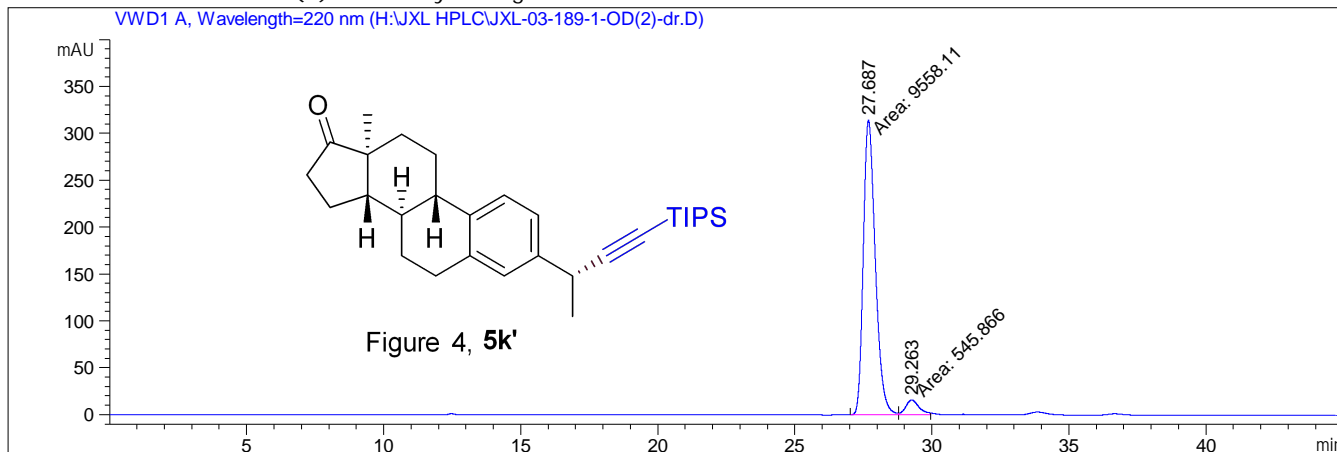

=====  
 Area Percent Report  
 =====

```

Sorted By      :      Signal
Multiplier     :      1.0000
Dilution      :      1.0000
Do not use Multiplier & Dilution Factor with ISTDs
  
```

Signal 1: VWD1 A, Wavelength=220 nm

| Peak # | RetTime [min] | Type | Width [min] | Area [mAU*s] | Height [mAU] | Area %  |
|--------|---------------|------|-------------|--------------|--------------|---------|
| 1      | 27.687        | MF   | 0.5074      | 9558.11328   | 313.93344    | 94.5975 |
| 2      | 29.263        | MF   | 0.5734      | 545.86591    | 15.86660     | 5.4025  |

Totals :                    1.01040e4    329.80004

=====  
 \*\*\* End of Report \*\*\*

```
=====
Acq. Operator   : 系统                      Seq. Line :   20
Acq. Instrument : HPLC-1260                 Location  :   91
Injection Date  : 3/9/2021 4:31:46 PM       Inj       :    1
                                                Inj Volume: 3.000 µl
Different Inj Volume from Sample Entry! Actual Inj Volume : 0.300 µl
Acq. Method     : D:\ZHH\20210309\YH 2021-03-09 10-26-38\11PA-30-0.5-1-2-220-JXL.M
Last changed    : 3/9/2021 4:13:51 PM by 系统
Analysis Method : E:\DATA\20210310\LC 2021-03-10 20-00-42\01PA_30_0.5_2 H.M (Sequence Method)
Last changed    : 3/10/2021 10:29:41 PM by SYSTEM
                  (modified after loading)
Additional Info : Peak(s) manually integrated
```

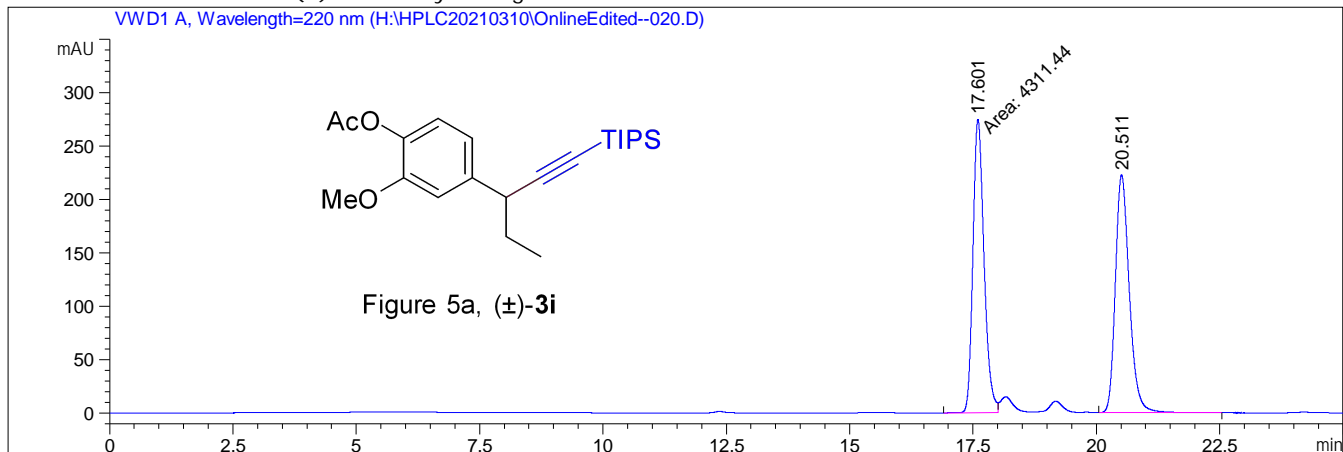

=====  
 Area Percent Report  
 =====

```
Sorted By      : Signal
Multiplier     : 1.0000
Dilution       : 1.0000
Do not use Multiplier & Dilution Factor with ISTDs
```

Signal 1: VWD1 A, Wavelength=220 nm

| Peak # | RetTime [min] | Type | Width [min] | Area [mAU*s] | Height [mAU] | Area %  |
|--------|---------------|------|-------------|--------------|--------------|---------|
| 1      | 17.601        | MF   | 0.2615      | 4311.43701   | 274.81775    | 49.6585 |
| 2      | 20.511        | BB   | 0.3011      | 4370.74121   | 222.61029    | 50.3415 |

Totals :                      8682.17822   497.42804

=====  
 \*\*\* End of Report \*\*\*

=====

|                                      |                       |
|--------------------------------------|-----------------------|
| Acq. Operator : 系统                   | Seq. Line : 22        |
| Acq. Instrument : HPLC-1260          | Location : 92         |
| Injection Date : 3/9/2021 5:34:34 PM | Inj : 1               |
|                                      | Inj Volume : 3.000 µl |

Different Inj Volume from Sample Entry! Actual Inj Volume : 0.800 µl

|                                                                                               |
|-----------------------------------------------------------------------------------------------|
| Acq. Method : D:\ZHH\20210309\YH 2021-03-09 10-26-38\11PA-30-0.5-1-2-220-JXL.M                |
| Last changed : 3/9/2021 4:13:51 PM by 系统                                                      |
| Analysis Method : E:\DATA\20210310\LC 2021-03-10 20-00-42\01PA_30_0.5_2 H.M (Sequence Method) |
| Last changed : 3/10/2021 10:31:15 PM by SYSTEM                                                |
| (modified after loading)                                                                      |

Additional Info : Peak(s) manually integrated

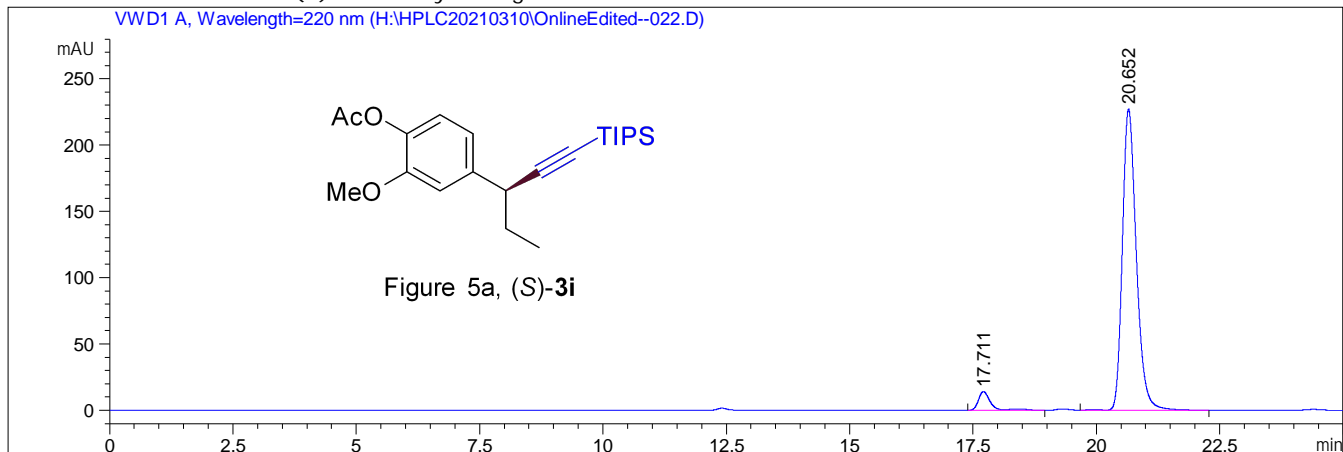

=====  
Area Percent Report  
=====

|            |   |        |
|------------|---|--------|
| Sorted By  | : | Signal |
| Multiplier | : | 1.0000 |
| Dilution   | : | 1.0000 |

Do not use Multiplier & Dilution Factor with ISTDs

Signal 1: VWD1 A, Wavelength=220 nm

| Peak # | RetTime [min] | Type | Width [min] | Area [mAU*s] | Height [mAU] | Area %  |
|--------|---------------|------|-------------|--------------|--------------|---------|
| 1      | 17.711        | BV R | 0.2603      | 247.38464    | 14.19770     | 5.2441  |
| 2      | 20.652        | VB R | 0.3020      | 4470.03857   | 227.23535    | 94.7559 |

Totals :                      4717.42322   241.43305

=====  
\*\*\* End of Report \*\*\*

=====  
Acq. Operator : 系统 Seq. Line : 13  
Acq. Instrument : HPLC-1260 Location : 82  
Injection Date : 10/1/2020 7:46:18 PM Inj : 1  
Inj Volume : 3.000 µl  
Different Inj Volume from Sample Entry! Actual Inj Volume : 2.000 µl  
Acq. Method : D:\zy\20200930\YH 2020-10-01 14-39-42\01PA-80-0.5-1-6-220-JXL.M  
Last changed : 10/1/2020 8:42:50 PM by 系统  
(modified after loading)  
Analysis Method : E:\DATA\20201027\LC 2020-11-25 23-35-05\101PA-60-0.5-220-4-JXL TFA.M (Sequence Method)  
Last changed : 12/16/2020 10:51:17 AM by SYSTEM  
(modified after loading)  
Additional Info : Peak(s) manually integrated

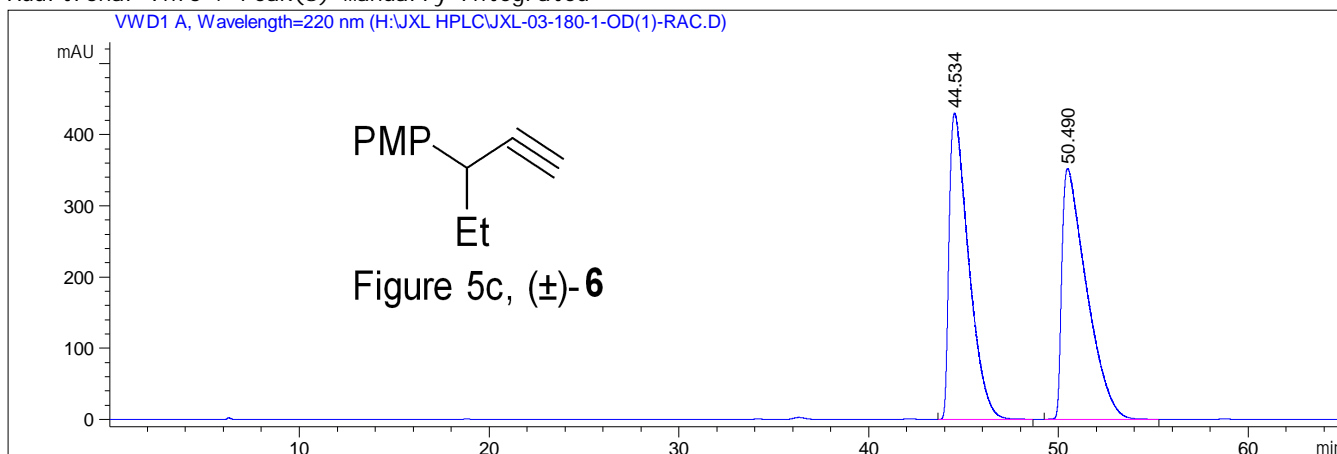

=====  
Area Percent Report  
=====

Sorted By : Signal  
Multiplier : 1.0000  
Dilution : 1.0000  
Do not use Multiplier & Dilution Factor with ISTDs

Signal 1: VWD1 A, Wavelength=220 nm

| Peak # | RetTime [min] | Type | Width [min] | Area [mAU*s] | Height [mAU] | Area %  |
|--------|---------------|------|-------------|--------------|--------------|---------|
| 1      | 44.534        | BB   | 1.0287      | 3.06876e4    | 430.47202    | 49.1524 |
| 2      | 50.490        | BB   | 1.2161      | 3.17460e4    | 352.04309    | 50.8476 |

Totals : 6.24336e4 782.51511

=====  
\*\*\* End of Report \*\*\*

```

=====
Acq. Operator   : 系统                               Seq. Line :   14
Acq. Instrument : HPLC-1260                           Location  :    83
Injection Date  : 10/1/2020 8:52:42 PM                 Inj       :    1
                                                    Inj Volume: 3.000 µl
Different Inj Volume from Sample Entry! Actual Inj Volume : 1.500 µl
Acq. Method     : D:\zy\20200930\YH 2020-10-01 14-39-42\01PA-80-0.5-1-6-220-JXL.M
Last changed    : 10/1/2020 8:42:50 PM by 系统
Analysis Method : E:\DATA\20201027\LC 2020-11-25 23-35-05\101PA-60-0.5-220-4-JXL TFA.M (
Sequence Method)
Last changed    : 12/16/2020 10:54:09 AM by SYSTEM
(modified after loading)
Additional Info  : Peak(s) manually integrated
  
```

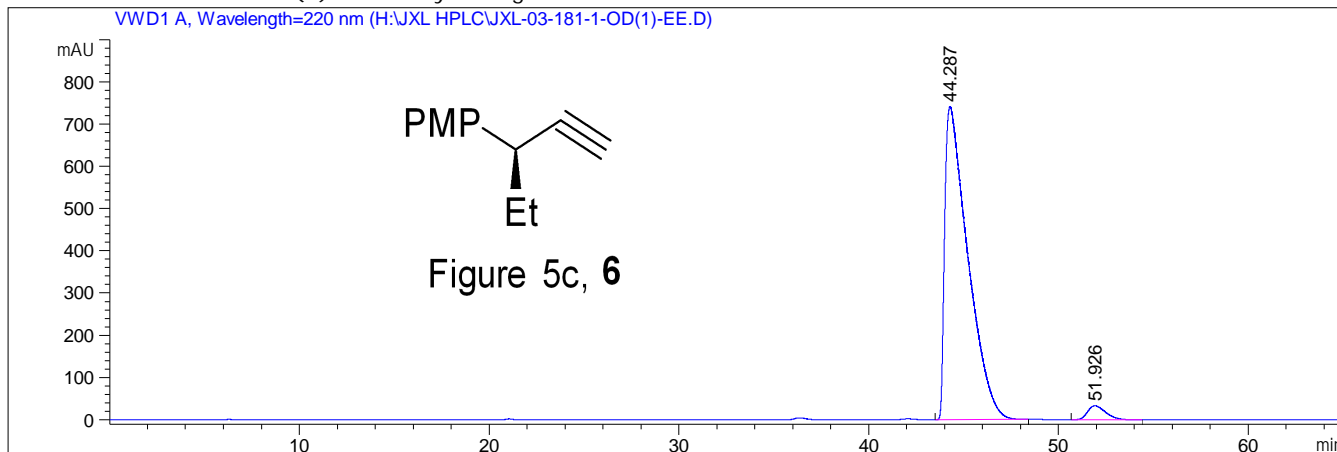

Area Percent Report

```

Sorted By      :      Signal
Multiplier     :      1.0000
Dilution       :      1.0000
Do not use Multiplier & Dilution Factor with ISTDs
  
```

Signal 1: VWD1 A, Wavelength=220 nm

| Peak # | RetTime [min] | Type | Width [min] | Area [mAU*s] | Height [mAU] | Area %  |
|--------|---------------|------|-------------|--------------|--------------|---------|
| 1      | 44.287        | BB   | 1.1729      | 6.26115e4    | 741.29761    | 96.5824 |
| 2      | 51.926        | BB   | 0.7805      | 2215.55591   | 33.26823     | 3.4176  |

Totals :                      6.48271e4    774.56584

\*\*\* End of Report \*\*\*

=====  
Acq. Operator : 系统 Seq. Line : 157  
Acq. Instrument : HPLC-1260 Location : 93  
Injection Date : 11/1/2020 10:51:34 PM Inj : 1  
Inj Volume : 3.000 µl  
Different Inj Volume from Sample Entry! Actual Inj Volume : 8.000 µl  
Acq. Method : D:\G527\FZ\20201026\YH 2020-10-29 08-35-49\201PA-60-0.8-1-2-254-JXL.M  
Last changed : 10/30/2020 11:10:37 PM by 系统  
Analysis Method : E:\DATA\20201027\LC 2020-11-25 23-35-05\101PA-60-0.5-220-4-JXL TFA.M (Sequence Method)  
Last changed : 12/16/2020 10:55:36 AM by SYSTEM (modified after loading)  
Additional Info : Peak(s) manually integrated

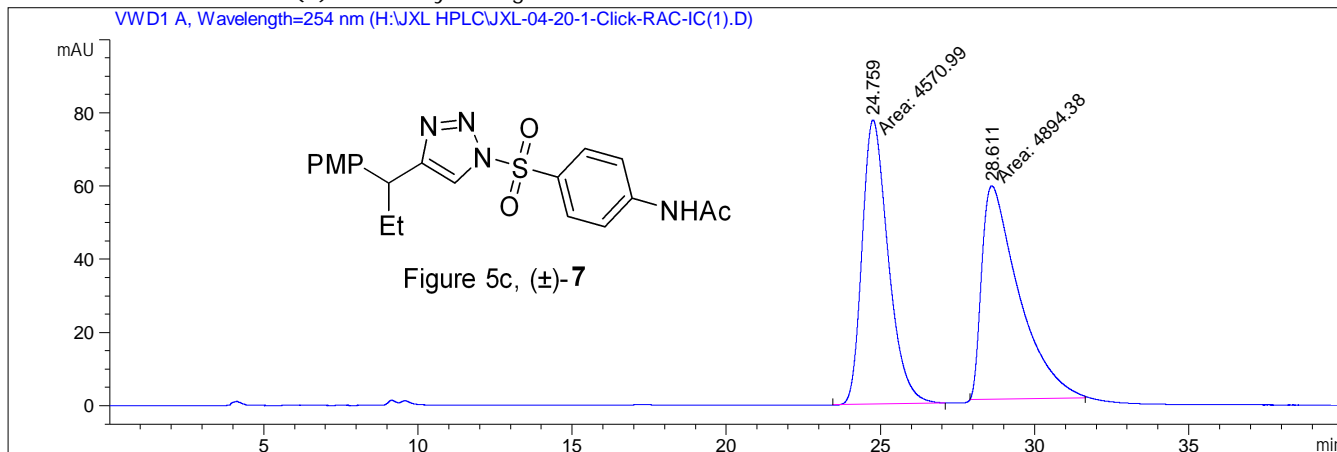

=====  
Area Percent Report  
=====

Sorted By : Signal  
Multiplier : 1.0000  
Dilution : 1.0000  
Do not use Multiplier & Dilution Factor with ISTDs

Signal 1: VWD1 A, Wavelength=254 nm

| Peak # | RetTime [min] | Type | Width [min] | Area [mAU*s] | Height [mAU] | Area %  |
|--------|---------------|------|-------------|--------------|--------------|---------|
| 1      | 24.759        | MM   | 0.9815      | 4570.99170   | 77.61681     | 48.2917 |
| 2      | 28.611        | MM   | 1.3984      | 4894.38379   | 58.33504     | 51.7083 |

Totals : 9465.37549 135.95186

=====  
\*\*\* End of Report \*\*\*



=====  
Acq. Operator : 系统 Seq. Line : 158  
Acq. Instrument : HPLC-1260 Location : 94  
Injection Date : 11/1/2020 11:33:06 PM Inj : 1  
Inj Volume : 3.000 µl  
Different Inj Volume from Sample Entry! Actual Inj Volume : 8.000 µl  
Acq. Method : D:\G527\FZ\20201026\YH 2020-10-29 08-35-49\201PA-60-0.8-1-2-254-JXL.M  
Last changed : 10/30/2020 11:10:37 PM by 系统  
Analysis Method : E:\DATA\20201027\LC 2020-12-29 20-00-48\151PA\_20\_8\_4.M (Sequence Method)  
Last changed : 12/31/2020 11:53:19 PM by SYSTEM  
(modified after loading)  
Additional Info : Peak(s) manually integrated

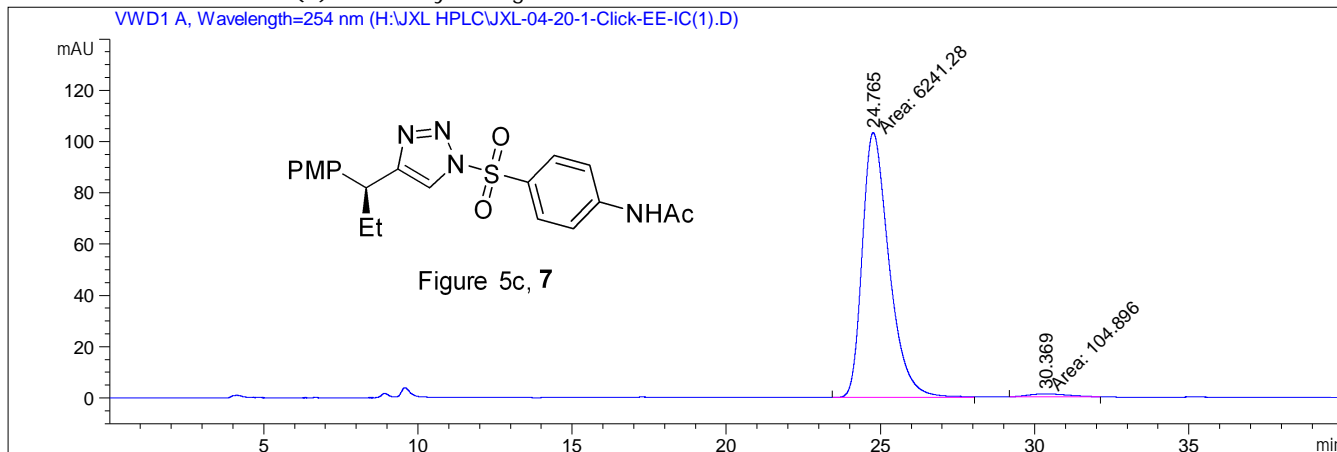

=====  
Area Percent Report  
=====

Sorted By : Signal  
Multiplier : 1.0000  
Dilution : 1.0000  
Do not use Multiplier & Dilution Factor with ISTDs

Signal 1: VWD1 A, Wavelength=254 nm

| Peak # | RetTime [min] | Type | Width [min] | Area [mAU*s] | Height [mAU] | Area %  |
|--------|---------------|------|-------------|--------------|--------------|---------|
| 1      | 24.765        | MF   | 1.0067      | 6241.28369   | 103.32697    | 98.3471 |
| 2      | 30.369        | MM   | 1.4662      | 104.89571    | 1.19238      | 1.6529  |

Totals : 6346.17941 104.51934

=====  
\*\*\* End of Report \*\*\*  
=====

=====

|                 |                         |            |            |
|-----------------|-------------------------|------------|------------|
| Acq. Operator   | : SYSTEM                | Seq. Line  | : 59       |
| Acq. Instrument | : HPLC1260              | Location   | : P2-B1    |
| Injection Date  | : 11/25/2020 4:28:55 PM | Inj        | : 1        |
|                 |                         | Inj Volume | : 3.000 µl |

Different Inj Volume from Sample Entry! Actual Inj Volume : 2.000 µl

|                 |                                                                                    |
|-----------------|------------------------------------------------------------------------------------|
| Acq. Method     | : E:\DATA\20201027\LC 2020-11-24 17-29-49\1PA-40-0.5-220-3-JXL.M                   |
| Last changed    | : 11/25/2020 5:10:38 PM by SYSTEM<br>(modified after loading)                      |
| Analysis Method | : E:\DATA\20201027\LC 2020-11-24 17-29-49\1PA-40-0.5-220-3-JXL.M (Sequence Method) |
| Last changed    | : 12/16/2020 11:01:36 AM by SYSTEM<br>(modified after loading)                     |

Additional Info : Peak(s) manually integrated

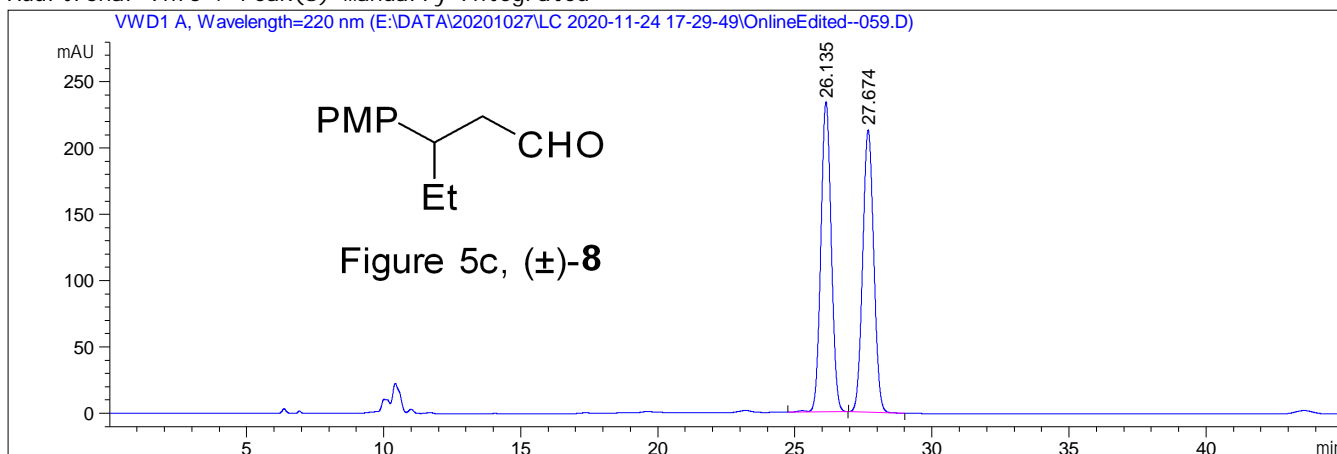

=====  
Area Percent Report  
=====

|            |          |
|------------|----------|
| Sorted By  | : Signal |
| Multiplier | : 1.0000 |
| Dilution   | : 1.0000 |

Do not use Multiplier & Dilution Factor with ISTDs

Signal 1: VWD1 A, Wavelength=220 nm

| Peak # | RetTime [min] | Type | Width [min] | Area [mAU*s] | Height [mAU] | Area %  |
|--------|---------------|------|-------------|--------------|--------------|---------|
| 1      | 26.135        | VB R | 0.4109      | 6170.07764   | 233.78003    | 50.8392 |
| 2      | 27.674        | BB   | 0.4379      | 5966.36768   | 212.94882    | 49.1608 |

Totals : 1.21364e4 446.72885

=====  
\*\*\* End of Report \*\*\*

```

=====
Acq. Operator   : SYSTEM                               Seq. Line :   60
Acq. Instrument : HPLC1260                             Location  : P2-B2
Injection Date  : 11/25/2020 5:14:38 PM                Inj       :    1
                                                    Inj Volume: 3.000 µl
Different Inj Volume from Sample Entry! Actual Inj Volume : 0.300 µl
Acq. Method    : E:\DATA\20201027\LC 2020-11-24 17-29-49\1PA-40-0.5-220-3-JXL.M
Last changed   : 11/25/2020 5:10:38 PM by SYSTEM
Analysis Method : E:\DATA\20201027\LC 2020-11-24 17-29-49\1PA-40-0.5-220-3-JXL.M (Sequence
Method)
Last changed   : 12/16/2020 11:01:36 AM by SYSTEM
(modified after loading)
Additional Info : Peak(s) manually integrated
  
```

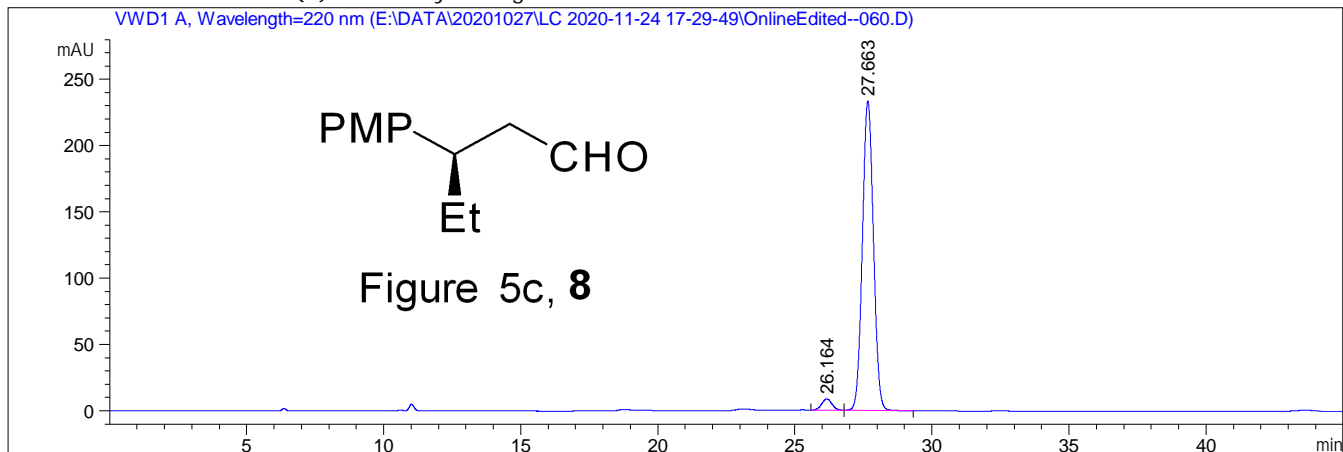

=====  
 Area Percent Report  
 =====

```

Sorted By      : Signal
Multiplier    : 1.0000
Dilution      : 1.0000
Do not use Multiplier & Dilution Factor with ISTDs
  
```

Signal 1: VWD1 A, Wavelength=220 nm

| Peak # | RetTime [min] | Type | Width [min] | Area [mAU*s] | Height [mAU] | Area %  |
|--------|---------------|------|-------------|--------------|--------------|---------|
| 1      | 26.164        | BB   | 0.4043      | 217.16803    | 8.40917      | 3.2146  |
| 2      | 27.663        | BB   | 0.4369      | 6538.50342   | 233.36398    | 96.7854 |

Totals :                      6755.67145    241.77315

=====  
 \*\*\* End of Report \*\*\*

=====  
Acq. Operator : 系统 Seq. Line : 111  
Acq. Instrument : HPLC-1260 Location : 91  
Injection Date : 10/16/2020 2:02:41 AM Inj : 1  
Inj Volume : 3.000 µl  
Different Inj Volume from Sample Entry! Actual Inj Volume : 0.200 µl  
Acq. Method : D:\G527\FZ\20201013\YH 2020-10-13 08-36-19\01PA-40-0.5-1-2-220-JXL.M  
Last changed : 10/15/2020 11:27:15 PM by 系统  
Analysis Method : E:\DATA\20201027\LC 2020-12-15 14-02-17\101PA\_20\_1.0\_4.ZWJ.M (Sequence Method)  
Last changed : 12/16/2020 10:39:43 AM by SYSTEM  
(modified after loading)  
Additional Info : Peak(s) manually integrated

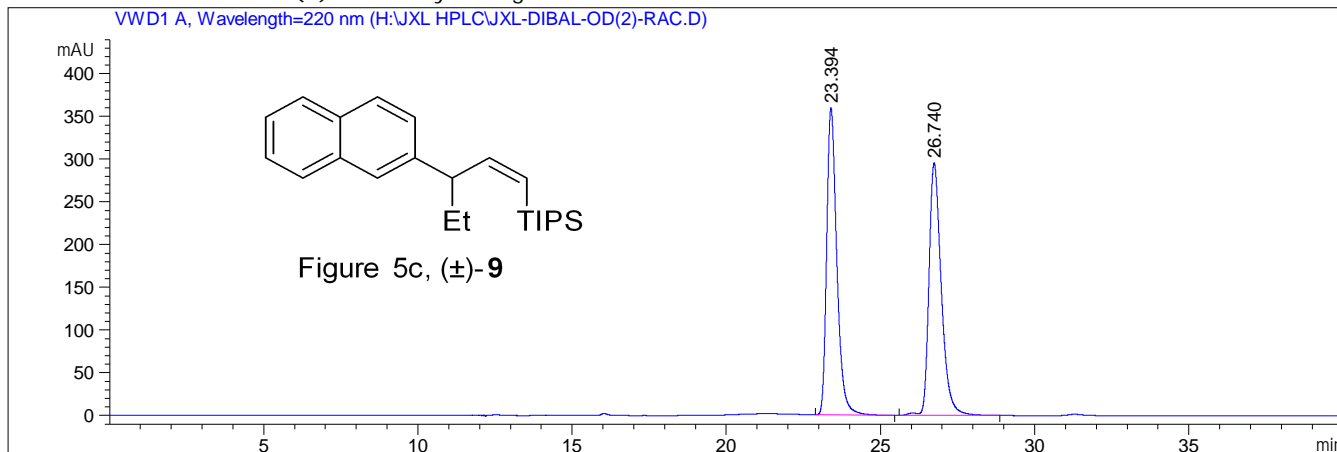

=====  
Area Percent Report  
=====

Sorted By : Signal  
Multiplier : 1.0000  
Dilution : 1.0000  
Do not use Multiplier & Dilution Factor with ISTDs

Signal 1: VWD1 A, Wavelength=220 nm

| Peak # | RetTime [min] | Type | Width [min] | Area [mAU*s] | Height [mAU] | Area %  |
|--------|---------------|------|-------------|--------------|--------------|---------|
| 1      | 23.394        | BB   | 0.3493      | 8235.24219   | 359.38779    | 50.0443 |
| 2      | 26.740        | VB R | 0.4200      | 8220.66504   | 295.71948    | 49.9557 |

Totals : 1.64559e4 655.10727

=====  
\*\*\* End of Report \*\*\*

```

=====
Acq. Operator   : 系统                               Seq. Line :   26
Acq. Instrument : HPLC-1260                           Location  :   93
Injection Date  : 11/6/2020 10:32:36 PM                Inj       :    1
                                                    Inj Volume: 3.000 µl
Different Inj Volume from Sample Entry! Actual Inj Volume : 0.200 µl
Acq. Method     : D:\G527\FZ\20201106\YH 2020-11-06 09-03-38\01PA-40-0.5-1-6-220-JXL.M
Last changed    : 11/6/2020 11:03:43 PM by 系统
                  (modified after loading)
Analysis Method : E:\DATA\20201027\LC 2020-12-15 14-02-17\101PA_20_1.0_4.ZWJ.M (Sequence
                  Method)
Last changed    : 12/16/2020 10:41:24 AM by SYSTEM
                  (modified after loading)
Additional Info : Peak(s) manually integrated
  
```

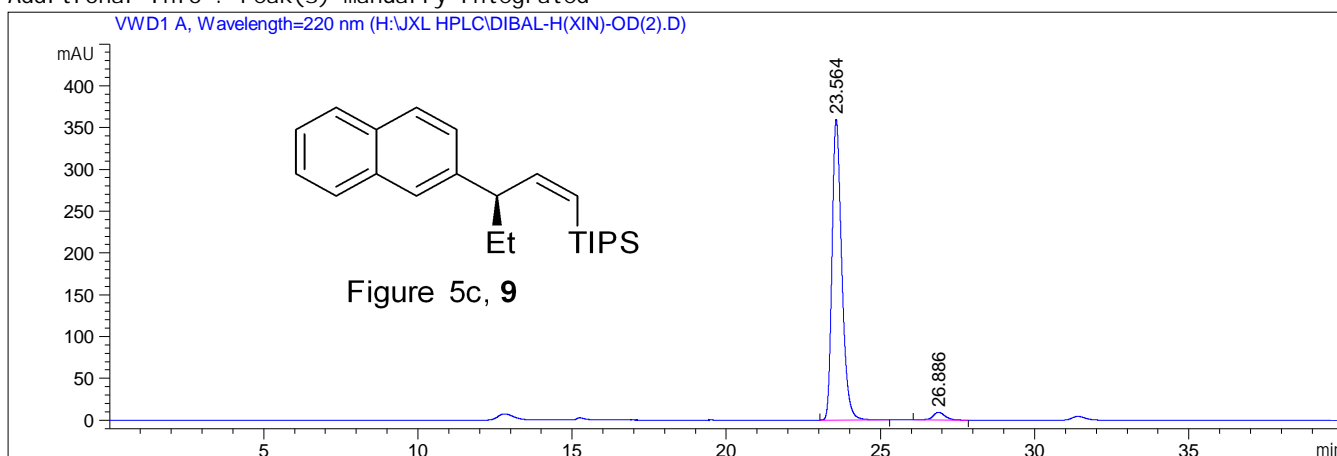

Area Percent Report

```

Sorted By      :      Signal
Multiplier     :      1.0000
Dilution      :      1.0000
Do not use Multiplier & Dilution Factor with ISTDs
  
```

Signal 1: VWD1 A, Wavelength=220 nm

| Peak # | RetTime [min] | Type | Width [min] | Area [mAU*s] | Height [mAU] | Area %  |
|--------|---------------|------|-------------|--------------|--------------|---------|
| 1      | 23.564        | BB   | 0.3336      | 7883.77832   | 359.83118    | 96.8967 |
| 2      | 26.886        | BB   | 0.3775      | 252.49660    | 9.36688      | 3.1033  |

Totals :                      8136.27492   369.19806

\*\*\* End of Report \*\*\*

```

=====
Acq. Operator   : SYSTEM                      Seq. Line :    9
Acq. Instrument : HPLC1260                   Location  : P2-B5
Injection Date  : 11/26/2020 4:53:04 AM      Inj       :    1
                                           Inj Volume: 3.000 µl
Different Inj Volume from Sample Entry! Actual Inj Volume : 6.000 µl
Acq. Method     : E:\DATA\20201027\LC 2020-11-25 23-35-05\101PA-60-0.5-220-4-JXL TFA.M
Last changed    : 11/26/2020 12:35:05 AM by SYSTEM
Analysis Method : E:\DATA\20201027\LC 2020-11-25 23-35-05\101PA-60-0.5-220-4-JXL TFA.M (
                  Sequence Method)
Last changed    : 12/18/2020 3:32:57 PM by SYSTEM
                  (modified after loading)
Additional Info : Peak(s) manually integrated
  
```

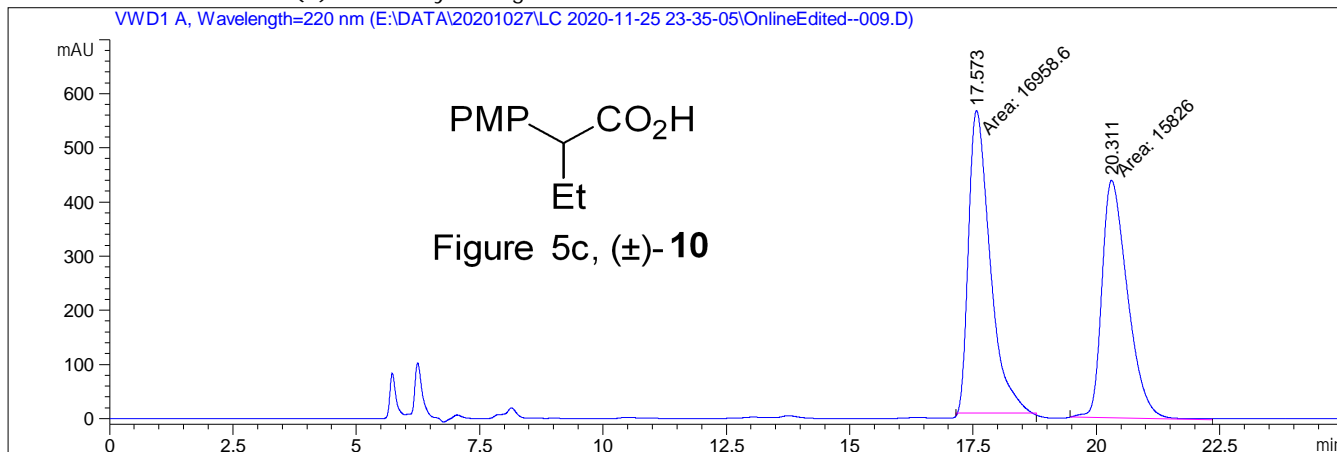

=====  
 Area Percent Report  
 =====

```

Sorted By       :      Signal
Multiplier      :      1.0000
Dilution        :      1.0000
Do not use Multiplier & Dilution Factor with ISTDs
  
```

Signal 1: VWD1 A, Wavelength=220 nm

| Peak # | RetTime [min] | Type | Width [min] | Area [mAU*s] | Height [mAU] | Area %  |
|--------|---------------|------|-------------|--------------|--------------|---------|
| 1      | 17.573        | MM   | 0.5064      | 1.69586e4    | 558.18024    | 51.7273 |
| 2      | 20.311        | PM   | 0.6016      | 1.58260e4    | 438.45648    | 48.2727 |

Totals :                                  3.27845e4    996.63672

=====  
 \*\*\* End of Report \*\*\*



=====  
Acq. Operator : 系统 Seq. Line : 62  
Acq. Instrument : HPLC-1260 Location : 91  
Injection Date : 12/11/2020 6:39:59 AM Inj : 1  
Inj Volume : 3.000 µl  
Different Inj Volume from Sample Entry! Actual Inj Volume : 0.300 µl  
Acq. Method : D:\G527\FZ\20201127\YH 2020-12-10 10-05-55\01PA-40-0.5-1-6-220-JXL.M  
Last changed : 12/11/2020 12:15:19 AM by 系统  
Analysis Method : E:\DATA\20201027\LC 2020-11-24 17-29-49\11PA-40-0.5-220-3-JXL.M (Sequence Method)  
Last changed : 12/16/2020 11:05:22 AM by SYSTEM  
(modified after Loading)

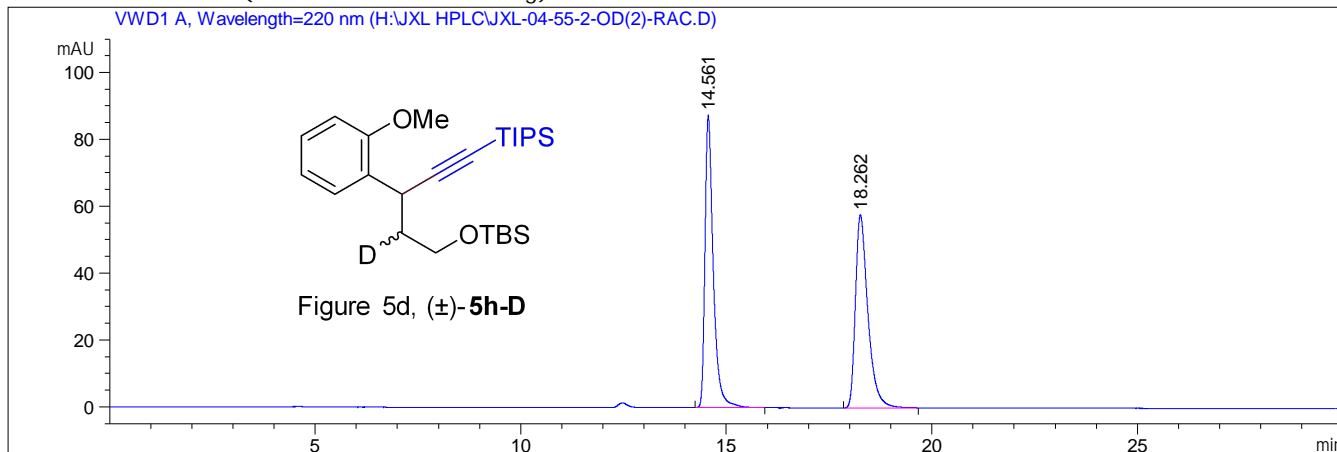

=====  
Area Percent Report  
=====

Sorted By : Signal  
Multiplier : 1.0000  
Dilution : 1.0000  
Do not use Multiplier & Dilution Factor with ISTDs

Signal 1: VWD1 A, Wavelength=220 nm

| Peak # | RetTime [min] | Type | Width [min] | Area [mAU*s] | Height [mAU] | Area %  |
|--------|---------------|------|-------------|--------------|--------------|---------|
| 1      | 14.561        | BB   | 0.2087      | 1226.21692   | 87.40794     | 50.1898 |
| 2      | 18.262        | BB   | 0.3189      | 1216.94397   | 57.72718     | 49.8102 |

Totals : 2443.16089 145.13512

=====  
\*\*\* End of Report \*\*\*





## Supplementary References

- [1] Berk, S. C., Kreutzer, K. A. & Buchwald, S. L. A catalytic method for the reduction of esters to alcohols. *J. Am. Chem. Soc.* **113**, 5093–5095 (1991).
- [2] Berk, S. C. & Buchwald, S. L. An air-stable catalyst system for the conversion of esters to alcohols. *J. Org. Chem.* **57**, 3751–3753 (1992).
- [3] Einaru, S., Shitamichi, K., Nagano, T., Matsumoto, A., Asano, K. & Matsubara, S. *trans*-Cyclooctenes as halolactonization catalysts. *Angew. Chem. Int. Ed.* **57**, 13863–13867 (2018).
- [4] Benoit, G. & Charette, A. B. Diastereoselective borocyclopropanation of allylic ethers using a boromethylzinc carbenoid. *J. Am. Chem. Soc.* **139**, 1364–1367 (2017).
- [5] Chen, Z., Liang, P., Xu, F., Deng, Z., Long, L., Luo, G. & Ye, M. Metal-free aminothiation of alkynes: three-component tandem annulation toward indolizine thiones from 2-alkylpyridines, ynals, and elemental sulfur. *J. Org. Chem.* **84**, 12639–12647 (2019).
- [6] Kim, S. W., Wurm, T., Brito, G. A., Jung, W.-O., Zbieg, J. R., Stivala, C. E. & Krische, M. J. Hydroamination versus allylic amination in iridium-catalyzed reactions of allylic acetates with amines: 1,3-aminoalcohols via ester-directed regioselectivity. *J. Am. Chem. Soc.* **140**, 9087–9099 (2018).
- [7] Hatakeyama, T., Hashimoto, T., Kondo, Y., Fujiwara, Y., Seike, H., Takaya, H., Tamada, Y., Ono, T. & Nakamura, M. Iron-catalyzed suzuki–miyaura coupling of alkyl halides. *J. Am. Chem. Soc.* **132**, 10674–10676 (2010).
- [8] Wang, Y.-F., Gao, Y.-R., Mao, S., Zhang, Y.-L., Guo, D.-D., Yan, Z.-L., Guo, S.-H. & Wang, Y.-Q. Wacker-type oxidation and dehydrogenation of terminal olefins using molecular oxygen as the sole oxidant without adding ligand. *Org. Lett.* **16**, 1610–1613 (2014).
- [9] Zhu, D. Lv, L., Li, C.-C., Ung, S., Gao, J. & Li, C.-J. Umpolung of carbonyl groups as alkyl organometallic reagent surrogates for palladium-catalyzed allylic alkylation.

*Angew. Chem. Int. Ed.* **57**, 16520–16524 (2018).

[10] Chen, F., Xu, X., He, Y., Huang, G. & Zhu, S. NiH-catalyzed migratory defluorinative olefin cross-coupling: trifluoromethyl-substituted alkenes as acceptor olefins to form gem-difluoroalkenes. *Angew. Chem. Int. Ed.* **59**, 5398–5402 (2020).

[11] Cosgrove, S. C., Hussain, S., Turner, N. J. & Marsden, S. P. Synergistic chemo/biocatalytic synthesis of alkaloidal tetrahydroquinolines. *ACS Catal.* **8**, 5570–5573 (2018).

[12] Álvarez-Calero, J. M., Jorge, Z. D. & Massanet, G. M. TiCl<sub>4</sub>/Et<sub>3</sub>N-mediated condensation of acetate and formate esters: direct access to β-alkoxy- and β-aryloxyacrylates. *Org. Lett.* **18**, 6344–6347 (2016).

[13] Taeufer, T. & Pospech, J. Palladium-catalyzed synthesis of N,N-dimethylanilines via Buchwald–Hartwig amination of (hetero)aryl triflates. *J. Org. Chem.* **85**, 7097–7111 (2020).

[14] Liu, X., Liu, B. & Liu, Q. Migratory hydrogenation of terminal alkynes by base/cobalt relay catalysis. *Angew. Chem. Int. Ed.* **59**, 6750–6755 (2020).

[15] Chen, Z.-M., Liu, J., Guo, J.-Y., Loch, M., DeLuca, R. J. & Sigman, M. S. Palladium-catalyzed enantioselective alkenylation of alkenylbenzene derivatives. *Chem. Sci.* **10**, 7246–7250 (2019).

[16] He, J., Song, P., Xu, X., Zhu, S. & Wang, Y. Migratory reductive acylation between alkyl halides or alkenes and alkyl carboxylic acids by nickel catalysis. *ACS Catal.* **9**, 3253–3259 (2019).

[17] He, Y., Cai, Y. & Zhu, S. Mild and regioselective benzylic C–H functionalization: Ni-catalyzed reductive arylation of remote and proximal olefins. *J. Am. Chem. Soc.* **139**, 1061–1064 (2017).

[18] Shimogaki, M., Fujita, M. & Sugimura, T. Metal-free enantioselective oxidative arylation of alkenes: hypervalent-iodine-promoted oxidative C–C bond formation. *Angew. Chem. Int. Ed.* **55**, 15797–15801 (2016).

- [19] Liu, H., Xu, M., Cai, C., Chen, J., Gu, Y. & Xia, Y. Cobalt-catalyzed Z to E isomerization of alkenes: an approach to (E)- $\beta$ -substituted styrenes. *Org. Lett.* **22**, 1193–1198 (2020).
- [20] He, Y., Liu, C., Yu, L. & Zhu, S. Enantio- and regioselective NiH-catalyzed reductive hydroarylation of vinylarenes with aryl iodides. *Angew. Chem. Int. Ed.* **59**, 21530–21534 (2020).
- [21] Pospíšil, J. & Markó, I. E. Efficient and stereoselective synthesis of allylic ethers and alcohols, *Org. Lett.* **8**, 5983–5986 (2006).
- [22] Zhang, C., Liu, P.-X., Huang, L.-Y., Wei, S.-P., Wang, L., Yang, S.-Y., Yu, X.-Q., Pu, L. & Wang, Q. Engineering P450 peroxygenase to catalyze highly enantioselective epoxidation of cis- $\beta$ -methylstyrenes. *Chem. Eur. J.* **22**, 10969–10975 (2016).
- [23] Xu, C., Shen, X. & Hoveyda, A. H. In situ methylene capping: a general strategy for efficient stereoretentive catalytic olefin metathesis. the concept, methodological implications, and applications to synthesis of biologically active compounds. *J. Am. Chem. Soc.* **139**, 10919–10928 (2017).
- [24] Dydio, P., Detz, R. J., de Bruin, B. & Reek, J. N. Beyond classical reactivity patterns: hydroformylation of vinyl and allyl arenes to valuable  $\beta$ - and  $\gamma$ -aldehyde intermediates using supramolecular catalysis. *J. Am. Chem. Soc.* **136**, 8418–8429 (2014).
- [25] Niharika, P. & Satyanarayana, G. [Pd]-catalyzed intermolecular coupling and acid mediated intramolecular cyclodehydration: one-pot synthesis of indenenes. *Eur. J. Org. Chem.* **2018**, 971–979 (2018).
- [26] Kim, H. & Lee, C. A mild and efficient method for the stereoselective formation of C–O bonds: palladium-catalyzed allylic etherification using zinc(II) alkoxides. *Org. Lett.* **4**, 4369–4371 (2002).
- [27] Mikhaylov, A. A., Dilman, A. D., Novikov, R. A., Khoroshutina, Y. A.,

- Struchkova, M. I., Arkhipov, D. E., Nelyubina, Y. V., Tabolin, A. A. & Ioffe, S. L. Tandem Pd-catalyzed C–C coupling/recyclization of 2-(2-bromoaryl)cyclopropane-1,1-dicarboxylates with primary nitro alkanes. *Tetrahedron Lett.* **57**, 11–14 (2016).
- [28] Bejot, R., Anjaiah, S., Falck, J. R. & Mioskowski, C.  $\alpha$ -Haloenol acetates: versatile reactants for oxetan-2-one, azetidin-2-one and isoxazolidin-5-one synthesis. *Eur. J. Org. Chem.* **2007**, 101–107 (2007).
- [29] Ruan, J., Li, X., Saidi, O. & Xiao, J. Oxygen and base-free oxidative heck reactions of arylboronic acids with olefins. *J. Am. Chem. Soc.* **130**, 2424–2425 (2008).
- [30] Lundgren, R. J. & Thomas, B. N. Chemo- and regioselective reductive transposition of allylic alcohol derivatives via iridium or rhodium catalysis. *Chem. Commun.* **52**, 958–961 (2016).
